# Supplementary material for: Lamin A/C-regulated cysteine catabolic flux modulates stem cell fate through epigenome reprogramming
Source: Springer Nature journal article supplement (doi:10.1038/s42255-025-01443-2), 2026-01-28
Supplement: MOESM3 [file 42255_2025_1443_MOESM3_ESM.xlsx]

## Sheet: Supplementary Table 1
Supplementary Table 1： LC-MS-based untargeted metabolomics analysis was performed on control and Lmna-/- mESCs, as well as during cardiomyocyte differentiation of wild-type (WT) mESCs.
Metabolites	ES WT	ES WT	ES WT	ES WT	ES WT	ES WT	ES KO	ES KO	ES KO	ES KO	ES KO	ES KO	Mesoderm stage WT	Mesoderm stage WT	Mesoderm stage WT	Mesoderm stage WT	Mesoderm stage WT	Mesoderm stage WT	Progenitor stage WT	Progenitor stage WT	Progenitor stage WT	Differentiated progeny stage WT	Differentiated progeny stage WT	Differentiated progeny stage WT
Glucose	53.4242	64.6933	65.4565	301.351	574.953	431.736	73.4842	98.8777	124.763	131.039	412.589	406.846	403.23	59.3373	67.4314	217.577	162.944	198.877	64.4118	143.779	65.6706	25.45	27.8614	30.2085
Fructose	51.0642	57.6354	80.1356	113.164	165.955	156.671	66.3157	58.9344	181.279	99.7722	172.448	204.465	64.0517	148.391	123.795	67.9542	74.0276	70.113	95.0069	178.927	91.7305	547.229	393.078	1474.65
Glucose_6P	55.6454	66.0658	83.5931	115.018	179.732	138.312	72.773	68.176	167.332	107.539	150.737	204.765	75.0911	110.301	101.854	83.1875	79.546	80.5361	84.2047	137.727	99.0003	333.594	306.513	485.321
D_gluconic_acid	24.5687	34.6866	28.6066	31.0894	45.9206	37.6592	19.0769	27.2403	11.6241	18.6023	21.2507	17.7313	48.3318	53.1304	47.7177	52.0547	35.4039	30.9509	195.836	255.033	157.64	358.642	183.01	200.622
Gluconic acid_6P	295.185	414.623	806.163	665.314	482.663	727.768	272.879	558.276	267.549	381.933	541.975	649.773	176.312	220.736	283.279	341.817	641.439	512.99	334.007	428.245	318.285	283.385	295.798	243.63
Galactose_6P	133.778	173.693	305.688	244.466	156.602	253.51	129.082	258.662	169.347	126.291	222.646	259.663	200.959	263.887	298.204	192.385	272.04	186.88	203.415	271.199	224.788	324.749	387.591	411.449
Ribose_5P	444.473	615.164	1168.81	762.223	547.55	745.509	476.33	1028.56	531.268	414.969	494.701	502.119	737.802	858.266	891.383	628.28	915.449	654.153	427.094	427.88	451.071	396.023	394.335	456.434
Ribulose_5P	580.005	888.292	1637.29	1081.73	850.762	1139.86	678.758	1354.1	751.87	610.908	743.117	782.552	1021.29	1212.5	1211.19	908.365	1425.12	1027.47	616.018	647.806	707.109	626.811	595.261	648.078
Sedoheptulose_7P	42.3418	56.6396	111.765	62.6474	48.242	76.4574	81.2252	108.786	68.3741	51.8887	49.2217	62.8871	168.77	124.907	118.997	43.6141	58.1051	46.9967	65.0412	69.5098	77.7867	79.3573	75.0734	103.887
Erythrose_4P	0	0	0	0	0	0	0	0	0	0	0	0	220.262	394.272	314.352	0	0	0	1062.03	756.662	984.761	1075.91	941.093	713.424
Fructose_6P	122.235	151.489	292.928	208.821	158.092	286.395	134.394	260.55	166.562	131.048	230.67	285.416	217.23	313.764	345.138	181.468	288.803	194.728	200.478	263.593	241.664	334.991	425.078	446.63
Aldopedose	0	0	0	57799	85023.3	76791.3	0	0	0	5817.87	10340.3	6044.55	0	0	74611.3	10452.3	17059.8	13427.8	1511.76	1971.3	2247	6780.31	5719.14	10626.3
Pyruvate	45.485	47.3575	45.7714	64.7634	97.9126	34.6496	94.9437	109.644	95.0418	88.0851	78.5548	98.54	63.721	73.0059	74.4788	196.759	151.042	106.615	67.3622	110.2	106.735	119.511	110.672	102.543
Lactate	67.0345	69.2453	70.2779	105.348	129.568	85.3895	132.4	125.962	151.768	96.3967	117.164	79.6398	145.951	148.145	125.438	213.629	234.202	188.396	157.112	175.869	167.788	207.701	180.18	180.768
Fumarate	6.41903	7.87433	7.31575	9.08506	11.3771	7.18788	16.411	13.7476	21.3274	11.5784	9.37319	9.14621	19.3024	17.3233	15.8785	18.4815	17.4108	14.5264	14.3348	12.2976	11.8179	24.0518	15.4089	20.5037
Succinate	8.78188	8.6027	7.74695	16.1996	28.4154	24.2625	8.79298	14.2051	15.261	13.4098	24.9135	22.0038	22.3089	22.5369	22.3759	30.5731	31.0379	34.6018	16.9992	20.3169	17.7114	10.2623	7.26243	9.73889
Aspartate	102.477	126.125	109.744	120.056	175.82	126.97	145.577	136.702	230.056	140.234	146.023	99.9578	227.688	207.439	206.379	308.422	272.252	235.089	196.577	167.706	167.577	90.5639	85.4948	77.9021
Malate	114.336	160.221	141.1	233.588	321.372	187.924	214.384	198.389	732.889	240.8	266.961	191.359	237.013	223.997	206.872	321.514	312.974	287.482	226.986	233.418	192.14	193.922	199.172	165.186
aKetogluterate	9.66241	12.0353	13.0139	19.6662	25.6259	13.8206	16.045	14.1392	29.2925	24.1428	14.8557	18.0092	10.5014	11.016	8.86259	26.3062	37.5159	32.473	14.8437	17.9731	12.0257	13.063	14.0205	11.9554
Citrate	37.437	46.7207	43.8591	23.8235	54.4876	34.0113	47.7974	35.7171	47.2943	18.6311	28.8495	12.2658	11.4147	9.69341	7.89671	6.78134	14.6787	8.99334	12.0376	32.1677	18.1397	22.6728	25.5825	27.3257
Isocitrate	1.46764	1.88689	1.87267	1.16468	1.96302	1.4045	1.04911	1.1044	1.14595	0.673454	0.988787	0.663524	0.0996078	0.0720723	0.0521315	0.170672	0.323417	0.28799	0.188721	0.593944	0.286949	0.306694	0.494152	0.428176
2HG	0.466609	0.490947	0.405279	0.58492	0.976766	0.733409	0.601963	0.57612	0.706805	0.650794	0.71634	0.546344	0.434156	0.425052	0.342238	0.442596	0.504916	0.382688	0.534032	0.581204	0.58464	0.833389	0.816447	16.9435
methylcitrate	0.017839	0.0776167	0.0577612	0.0251883	0.0386464	0.0193784	0.0226728	0.0126318	0.0335436	0.0282405	0.018	0.00932998	0.0256976	0.0427609	0.0403536	0.0122071	0.016924	0.0129992	0.0368116	0.0493363	0.021611	0.0455913	0.0438695	0.0532316
cis_aconiti_ acid	3.73606	4.80531	5.71317	3.66824	5.23867	0	5.24484	4.15337	5.00611	2.36485	5.83316	0	1.55857	1.41433	1.20176	0	0	0	3.06656	4.72705	2.76072	2.05179	3.56911	3.37633
Itaconate	17.5061	20.0015	17.9114	39.0985	56.7069	38.45	23.3655	24.0358	25.6146	24.9659	40.5434	28.54	17.228	16.3257	14.5679	31.3109	33.8642	32.0728	29.9948	33.107	27.3139	36.9082	36.8625	32.6551
methyl_malonic_acid	3.69904	2.41944	2.28805	1.74522	2.00483	1.25239	7.48867	3.28019	3.89023	2.2487	4.56	5.34	4.41996	4.87265	5.23735	7.57983	6.33752	7.15873	6.70426	4.97029	3.78932	8.1914	6.73133	8.30255
trans_aconitic_acid	14.3623	15.3739	16.847	9.36179	16.8543	10.4473	14.7024	11.7615	17.506	6.04799	8.68432	4.21167	3.44783	3.91558	3.56126	1.28568	2.50346	2.03002	2.58688	5.03226	2.02362	5.32678	6.40504	7.64983
Glutamine	2214.53	1370.14	2100.96	1969.44	1180.36	1683.85	1283.42	2134.61	1163.51	1807.34	1639.67	1983.72	1991.4	2367.95	3015.49	3332.82	5903.61	5617.54	1370.5	1314.92	2101.48	1222.12	1179.36	1314.07
Glutamate	12336.9	8305.28	13857.8	10481.5	6717.89	8123.7	6081.27	10846.5	6019.46	9048.56	6134.59	6545.05	13816.9	15100.8	19895.6	13079.1	20887.8	20454.4	10234.5	9275.21	11378	9009.8	9642.41	11932.8
Proline	1845.27	917.898	1575.12	1227.11	785.602	1033.75	846.35	1316.3	759.169	1049.24	900.787	1091.06	1930.53	2111.56	2740.54	1753.88	2942.14	3132.19	1896.54	1937.61	2347.46	3009.19	3305.32	3552.76
GPR	3.3759	0.351444	0.520501	0.62337	0.288697	0.439277	0.309752	0.406017	0.247475	0.360775	0.373617	0.494277	3.49812	4.25936	4.87944	1.85253	2.82527	4.14198	1.11054	1.03023	1.62141	1.67451	1.55506	1.69223
Serine	2807.93	1482.67	2151.04	1738.69	1088.98	1399.76	1179.31	1730.08	957.869	1689.87	1359.07	1528.94	2610.37	3245.29	4320.75	3755.95	6471.4	7130.41	1685.31	1500.77	2269.44	1935.66	2011.19	2234.88
Glycine	1787.76	905.272	1373.03	1137.56	686.962	850.356	1051.36	1510.26	817.514	1588.4	1126.05	1288.46	1859.6	2237.91	2869.72	2901.68	5089.54	5777.05	968.521	1143.12	1832.91	2231.32	2088.67	2075.95
Methionine	501.466	285.68	497.2	373.772	261.228	339.982	218.199	400.434	210.502	291.454	311.261	375.612	554.102	614.976	805.931	405.923	637.596	700.528	510.977	424.853	508.807	374.836	423.297	390.008
Cysteine	2.05351	7.67027	6.53795	6.4204	6.67624	7.66603	736.436	1233.71	762.499	849.013	830.238	998.614	2015.66	2177.37	2932.8	2623.02	2643.79	2897.18	1271.82	1158.61	1650.27	1352.94	1355.7	1450.92
Cystathionine	115.742	116.094	247.599	168.675	123.176	163.057	812.489	1576	1783.18	1353.75	1495.01	1830.11	1084.68	1188.37	1621.61	1399.64	2296.28	2194.71	1419.82	1446.58	1501.78	1259.37	1325.31	1218.35
Cystine	25.1155	33.001	56.1208	47.4628	35.8453	38.6087	152.007	134.786	137.053	147.071	165.087	158.859	54.0783	38.4633	61.1239	34.4058	68.3176	31.232	14.34	11.5873	16.4542	15.7018	11.8248	13.961
Homocysteine	55.9387	142.73	184.313	174.798	133.716	176.296	176.491	305.394	165.847	229.171	486.828	499.178	676.538	1056.3	1279.22	484.684	1403.13	1222.24	208.973	439.616	556.695	304.993	261.71	439.196
Arginine	830.955	164.818	285.416	257.345	151.394	195.463	183.86	297.117	190.878	171.333	155.953	184.402	1124.69	1310.48	1773.79	638.827	995.803	1373.57	636.179	474.468	725.708	517.945	513.643	551.239
Citrulline	4.60467	0.522942	0.888086	0.753063	1.38413	0.948345	0.934758	1.55865	1.05896	2.21096	1.9017	2.94521	5.95813	9.00207	14.6027	3.06175	6.00957	6.33466	34.5664	11.6725	9.55934	33.7764	36.8279	59.0899
Ornithine	7.23189	11.5444	19.1221	17.2957	13.5031	18.5442	8.87499	17.3745	12.0245	12.1725	14.5916	16.3504	10.9183	12.7453	35.562	10.5	22.0132	8.39097	34.0188	21.5061	17.4629	42.9793	51.6429	70.315
Asparagine	1437.88	570.726	860.354	617.22	376.773	499.323	482.347	633.154	346.958	472.174	414.644	493.843	1620.8	2030.1	2507.09	1565.65	2227.28	2816.22	958.91	829.44	1184.93	850.356	763.458	864.727
Hypoxanthine	382.041	86.5326	130.619	104.462	57.8058	73.4204	76.8371	116.865	65.5463	120.068	78.3417	92.9315	275.074	347.39	440.571	254.584	438.865	649.59	346.515	283.057	303.739	579.718	559.77	627.505
Threonine	1895.12	735.479	933.546	813.746	454.478	585.656	574.099	859.801	509.228	766.296	613.301	645.107	1905.35	2339.9	3010.19	2316.87	3831.63	4403.31	1773.57	1504.96	1713.71	2974.75	2664.71	2843.63
1MHIS	3.99428	1.70444	2.32126	2.0497	1.36122	1.78279	1.3688	2.59352	1.52336	1.65241	1.68323	2.0288	4.16993	5.1894	7.00505	2.38668	4.99551	5.92323	3.23	2.73446	3.46341	5.11866	4.69753	4.85764
PHP	2.24657	1.30796	1.94639	1.75267	1.26118	1.74125	1.91848	2.77357	1.64917	2.40253	2.43451	3.00341	1.65706	2.30699	3.07455	1.35272	2.43029	3.86282	0.94	0.866621	1.13656	1.96722	1.81893	1.98569
Alanine	3819.82	2436.35	4359.01	3108.14	2064	2844.13	2071.24	3422.21	2022.83	2898.54	2463.07	2898.03	4226.61	4606.54	6142.56	4347.04	7225.54	7275.61	2400.83	3617.43	4796.82	5330.55	6062.1	7167.66
GABA	396.154	53.6949	87.8609	84.0577	61.4667	66.253	139.586	170.291	107.389	135.411	60.8944	65.4326	188.093	193.839	276.06	161.734	169.291	336.824	142.095	130.925	268.436	894.948	809.881	1144.72
Lysine	1455.44	366.295	689.77	602.835	364.801	471.576	364.221	658.488	467.441	336.85	336.715	391.722	1608.93	1720.13	2224.75	1183.69	1854.59	1950.73	1734.47	1073.05	1332.01	1270.17	1372.38	1668.54
Aspartate	3798.98	2378.51	4097.5	2336.16	1221.82	1495.33	2082.35	3321.27	1973.31	2425.91	1644.03	1759.68	4219.81	4587.24	5814.48	3861.04	6096.57	6477.05	5235.8	2671.41	3214.11	2016.78	2138.24	2641.76
Histidine	461.063	88.4987	140.584	113.502	54.8679	76.5966	93.7032	138.537	88.7801	75.3181	59.1355	69.8632	582.532	630.516	819.713	270.109	440.872	550.225	385.808	258.774	327.873	320.731	323.845	436.881
TPR	21.3169	11.2265	18.0667	14.6803	10.4391	12.1652	16.6654	24.7258	12.9006	18.5215	12.3636	14.9891	21.1318	22.6673	30.7475	15.2666	25.6308	26.0135	15.2126	9.58903	14.5952	15.5534	15.2552	18.9934
Valine	3671.89	1031.47	1701.48	1390.33	944.984	1488.22	1030.48	1529.92	1100.45	1306.91	1227.74	1458.07	4549.89	5111.89	6574.34	2840.67	4612.8	4973.72	1837.8	2555.58	3404.14	3064.94	3176.99	4016.48
Tryptophane	172.251	35.8716	61.7431	46.668	26.1314	36.3478	40.0865	61.0182	35.8358	36.1434	32.7587	37.2524	218.582	236.033	282.879	85.4681	132.632	165.642	75.7301	61.3242	89.5395	68.5719	66.5932	89.6446
aminoadipicacid	3.93629	2.62489	4.47344	1.99858	1.26079	1.65465	1.14083	2.21138	1.30322	1.77401	1.40997	1.3497	5.03728	5.47894	7.39066	2.40052	3.62037	3.77887	2.89	2.23118	3.60738	6.56964	6.73087	10.3325
Leucine	1110.03	855.928	1525.85	1206.05	873.576	1154.06	622.022	1177.13	613.015	975.998	1059.34	1283.92	1038.08	1160.02	1593.85	1181.23	1914.05	2007.65	1138.9	1129.71	1313.62	1086.86	1105.37	1113.73
Phenylalanine	592.699	227.45	371.366	262.116	162.827	208.704	222.145	360.863	211.994	202.515	193.592	219.819	593.195	672.111	919.661	494.963	769.389	1004.1	643.063	439.032	615.934	574.954	536.317	624.206
aminopimelicacid	0.584827	0.183974	0.278976	0	0	0	0	0.236521	0	0	0	0	0.381924	0.40532	0.599678	0.317321	0	0.742885	0	0.387912	0.496591	0.935437	0.824976	1.10699
Sarcosine	4714.36	2591.29	4480.13	3043.44	2017.69	2718.26	2203.69	3510.53	2110.49	2801.01	2365.25	2786.49	5352.16	5922.74	7801.76	4666.59	7720.39	8158.69	2361.91	3671.71	5257.58	6138.27	7087.55	8705.71
Isoleucine	1284.53	1235.87	2223.18	1786.06	1297.3	1714.5	853.035	1660.66	825.692	1422.16	1575.76	1923.84	1130.89	1232.58	1680.82	1471.4	2407.98	2291.06	1469.5	1512.76	1576.85	1313.97	1377.98	1278.77
