# Supplementary material for: Lamin A/C-regulated cysteine catabolic flux modulates stem cell fate through epigenome reprogramming
Source: Springer Nature journal article supplement (doi:10.1038/s42255-025-01443-2), 2026-01-28
Supplement: MOESM6 [file 42255_2025_1443_MOESM6_ESM.xlsx]

## Sheet: Supplementary Table 4a
Supplemental Table 4a. RNA-seq analysis of control and Lmna G609G/G609G mESCs
SYMBOL	log2FoldChange	pvalue	padj	RPKM_Ctrl_exp2_r1	RPKM_Ctrl_exp2_r2	RPKM_G609G_homo_exp2_r1	RPKM_G609G_homo_exp2_r2
Zfp85	0.132811	0.736272	0.901047	0.553302	0.667429	0.699163	0.64595
Scap	-0.0109107	0.911145	0.969292	7.77497	8.43362	8.10729	8.11331
Zfp458	0.568136	0.515696		0.0708848	0.0565568	0.093531	0.0956708
Fbxo41	0.767579	0.33804		0.0412027	0.0376561	0.0515048	0.084293
Taf9b	-0.224358	0.526849	0.782343	0.884319	0.688569	0.772467	0.606228
Zfp941	0.262922	0.201663	0.48794	1.39441	1.32987	1.80452	1.49102
BC031181	0.220274	0.0545339	0.223897	21.9024	19.3772	25.3466	23.2768
Baz2b	0.202632	0.301523	0.603927	0.764862	0.712325	0.817975	0.90071
Primpol	0.756842	9.82307e-11	4.84746e-09	4.15534	4.14043	7.4166	6.74132
Zfp456	0.026517	0.933293	0.977253	0.528561	0.72965	0.749094	0.529475
Zfp738	0.0113588	0.969971	0.990772	0.554832	0.565184	0.621153	0.51063
Dis3l	0.495249	3.17447e-05	0.000512632	5.5065	4.78281	7.42799	7.2528
Thnsl1	0.393509	0.0941157	0.312127	1.56492	1.59599	2.22934	1.95565
Itga8	0.585233	0.275419	0.576783	0.137123	0.104947	0.251201	0.117894
Slc35d2	0.196797	0.485093	0.7553	1.12753	1.23468	1.35641	1.36419
Dennd2b	0.298016	0.0553232	0.226252	2.39066	2.12736	2.81428	2.80825
Vkorc1l1	-0.0507236	0.601189	0.827937	6.82617	6.98228	6.7921	6.66288
Hexd	0.16054	0.455799	0.734968	2.12876	2.38704	2.5012	2.58294
Plekha8	-0.161687	0.20632	0.495123	2.8333	2.72428	2.67574	2.34179
Zscan22	0.0333361	0.820248	0.932736	3.30836	3.49273	3.65571	3.35479
Ttyh1	0.162383	0.387609	0.682032	2.24266	2.25876	2.33998	2.75049
Tpm4	-0.114143	0.206343	0.495123	19.784	20.5167	18.8393	18.7331
Lca5l	1.90469	0.0778259		0.0390911	0.0226833	0.0814418	0.133288
Wdr83os	0.549399	3.54973e-06	7.01442e-05	27.5037	26.6863	37.2991	42.7571
Usp17ld	1.23833	0.0109174	0.0705369	0.377402	0.350391	0.901595	0.804263
Chpf	-0.0826575	0.468065	0.743726	7.17473	7.86437	6.89773	7.41402
Dab2ip	-0.51027	4.35771e-08	1.29586e-06	6.99373	6.92478	4.8751	4.99213
Sohlh1	-0.410062	0.708452		0.0966409	0.280388	0.0805362	0.192217
Nsd3	0.487891	0.00412964	0.0325382	2.03424	1.89357	2.72651	2.83224
Zfp950	0.242199	0.751108		0.0531809	0.0877051	0.083972	0.0823143
Itprip	0.00692522	0.983611	0.994873	0.499023	0.542938	0.555991	0.499356
Zfp239	0.161229	0.385607	0.680258	2.10501	2.51581	2.67129	2.52222
Atp11c	-0.0787407	0.757158	0.910392	0.67846	0.611624	0.553859	0.687508
Ephx4	2.03215	0.0545017		0.0439144	0.11467	0.439155	0.196526
Zfp36l2	-0.299856	0.0196735	0.109873	5.19116	5.7427	4.73084	4.22301
Mpzl1	-0.32205	0.000989292	0.0101015	15.9437	16.8013	13.0982	13.3119
Rtel1	0.182928	0.0323901	0.158072	16.7581	16.3048	17.7247	20.169
Hecw2	-1.02066	0.0396145	0.182531	0.103322	0.128474	0.0645778	0.048755
Nckap5l	-0.08267	0.548563	0.795301	2.86487	2.93385	2.69917	2.82252
Tmem151a	1.06772	3.3713e-05	0.000540909	0.599349	0.578969	1.21692	1.27577
H2-K1	0.709215	1.29288e-09	5.49835e-08	9.47119	9.80496	15.5901	16.1933
Eea1	-0.354151	0.15114	0.41115	0.541112	0.552796	0.423853	0.442535
Megf10	-0.55456	0.556896		0.0512814	0.0286942	0.0274729	0.0304432
Limch1	-0.140437	0.707879	0.887051	0.293915	0.256809	0.265661	0.23994
Utp14b	-0.0359737	0.873252	0.956493	1.2486	1.25174	1.2124	1.24964
Ccdc9b	0.588952	0.339449		0.090385	0.110394	0.138497	0.167761
Pi4ka	-0.0927578	0.338981	0.640144	5.33948	5.43207	5.02337	5.17131
Kdm2a	0.211155	0.0271368	0.138569	4.77146	5.20373	6.06389	5.58042
Nat8l	0.191368	0.568797	0.805866	0.292153	0.282647	0.367828	0.300995
Nol4l	-1.11988	3.31248e-05	0.000532096	0.880717	0.792131	0.428137	0.350346
Gp1bb	0.512067	0.528379		0.144894	0.120384	0.156424	0.218951
Bltp2	-0.0561452	0.396882	0.689489	17.6155	17.6005	17.2612	16.9337
Panx2	-1.20989	0.232837		0.0724452	0.115604	0.0402484	0.0411692
Zfp948	0.135922	0.340037	0.641215	4.66135	4.39201	4.97429	5.07498
Lmna	-0.651472	2.18972e-09	8.72954e-08	9.9402	10.4787	6.2996	6.82114
Hspa2	0.320456	0.295326	0.597224	0.789627	0.99539	1.06194	1.16979
Tdrd1	-0.123943	0.76859	0.914102	0.249722	0.340692	0.322683	0.211672
Rpl17	0.370045	0.0443707	0.196893	7.71539	8.76443	10.741	10.7578
Tmem158	0.973631	0.0673012	0.257113	0.380456	0.289756	0.822361	0.506732
Adgrg6	-1.00044	0.145452		0.101604	0.0994907	0.058212	0.0460111
Tro	0.380485	0.00175993	0.0161639	2.16108	2.27863	2.94223	2.88761
Smg6	0.0825523	0.415739	0.703929	6.42083	6.0232	6.26366	7.04826
Pram1	0.166815	0.776855	0.917645	0.314668	0.213317	0.310138	0.309496
Fbxl12	0.0354822	0.848941	0.946347	3.16588	3.39742	3.29378	3.48647
Nlrp14	0.134949	0.686881	0.875369	0.545303	0.629802	0.655429	0.654334
Smim29	0.339477	0.230232	0.523275	4.70135	4.48991	4.73412	6.98534
Atg9b	0.317222	0.247027	0.542593	0.737485	0.69105	0.833661	0.96553
Penk	0.746248	0.0125814	0.0788693	1.54847	1.24608	2.43477	2.34105
Nup85	0.00164588	0.980848	0.994191	58.0815	57.2923	57.339	59.2741
Pcdhac1	0.601702	0.473173		0.046658	0.0473798	0.0777654	0.0696014
Pcdhac2	0.690226	0.388274		0.0432034	0.0501391	0.0840087	0.067517
Osbpl8	0.306719	0.148376	0.407419	0.684647	0.669146	0.788138	0.897667
Ralgapa1	-0.0905156	0.553136	0.797121	1.30944	1.40136	1.29775	1.26963
Erbb2	-0.166618	0.340039	0.641215	1.85167	1.64292	1.60059	1.55605
Kcnq2	0.185993	0.677667	0.869399	0.352176	0.341904	0.451519	0.35216
Masp2	0.166827	0.316059	0.618302	2.93963	2.68013	3.10065	3.26944
Tardbp	0.0659711	0.294114	0.595578	32.0693	31.3313	33.1108	33.9008
Cltc	-0.172878	0.0127916	0.0798581	20.818	20.5617	19.2556	17.8142
Ankib1	-0.0778218	0.668566	0.865099	1.28734	1.28497	1.08493	1.37524
Ttc41	-0.0314245	0.944214	0.981704	0.236582	0.296527	0.216872	0.310567
Adamts7	-0.83415	0.0104557	0.0681809	0.494879	0.578812	0.289976	0.319679
Arhgef11	-0.0594429	0.63637	0.848328	2.58171	2.52007	2.44578	2.49914
Mars1	0.00473447	0.942992	0.98107	50.0761	49.4169	49.7118	51.0596
Zc4h2	-0.0514789	0.835823	0.940218	1.7813	1.64735	1.6932	1.64495
Atg9a	-0.106069	0.502136	0.768133	2.61169	2.71947	2.48314	2.52624
Usp7	-0.0669973	0.264131	0.564232	44.739	44.8101	43.6527	42.6524
Ddx11	0.0682779	0.484267	0.754787	7.93431	7.87775	8.17375	8.56042
Brsk1	0.219886	0.0866676	0.296208	4.91337	4.96464	5.83075	5.77556
Rtn3	0.114759	0.144126	0.400133	13.0365	12.6591	14.365	13.7378
Pid1	-0.408963	0.152963	0.4145	1.602	1.25091	1.30713	0.862815
Tmem259	-0.0243258	0.892091	0.962346	45.2889	45.0916	39.568	50.0836
Rab3ip	-0.0585622	0.566373	0.804186	11.1341	11.8204	11.6532	10.5834
Kdm2b	0.334515	0.000537564	0.00612684	5.78187	6.1219	7.46077	7.67236
Rab11fip5	-0.354422	0.109429	0.340223	0.84973	0.904507	0.68664	0.696616
Dnmt3b	-0.53236	7.69151e-17	1.2539e-14	48.5348	49.1387	34.9932	33.1922
Senp7	0.431972	0.424512	0.710885	0.448847	0.644618	0.673288	0.789126
Crtc1	0.577701	4.24888e-05	0.000665722	2.05757	2.44906	3.15672	3.60389
Zfp386	-0.375661	0.126818	0.371352	0.956602	1.21063	0.722605	0.956751
Zfp619	0.490394	0.11043	0.341825	0.331414	0.420677	0.448802	0.615036
Ckap2	0.400175	3.89975e-06	7.65089e-05	20.1555	20.6401	29.0136	25.3381
Usp22	0.123688	0.0966519	0.316915	16.8933	17.648	19.2781	18.6894
Git1	-0.221495	0.00334218	0.027447	25.8371	24.3672	21.8039	21.6939
Nlrp4g	1.59127	0.164659		0.0171475	0.0597009	0.171479	0.0730844
Slc13a5	-0.385284	0.425276	0.711459	0.307526	0.500508	0.215905	0.414758
A4galt	-0.60176	0.000121662	0.00170004	6.36593	6.27738	4.51603	3.89812
AU018091	-0.439812	4.7795e-09	1.70444e-07	31.5534	29.5287	22.7961	22.6897
Rragb	-0.314991	0.00890529	0.0601475	9.72798	10.9327	8.78956	7.93157
9930012K11Rik	-0.272566	0.305548	0.607547	1.78946	2.01033	1.78604	1.39235
Scarf1	0.212493	0.575787	0.810113	0.477613	0.542509	0.537329	0.659546
Gnptab	-0.0948557	0.458169	0.736232	3.51121	3.22109	3.3289	3.04906
Sgpp2	0.0130056	0.986365		0.0893308	0.0986875	0.0944869	0.0966486
AA467197	0.587705	0.513042		0.346598	0.33939	0.487416	0.553963
Maml3	-2.09359	0.103519		0.0716706	0.016513	0.0158101	0.0053906
Celsr2	0.0708832	0.664189	0.86241	0.850292	0.868586	0.946434	0.879164
Frg2f1	0.378127	0.575721		0.238663	0.23606	0.379701	0.231183
Fam222a	-0.150689	0.452359	0.732543	2.32619	2.26449	2.13622	2.03507
Slc28a1	0.235577	0.0149162	0.0893731	10.7961	11.5171	13.1558	13.3389
Whamm	0.0649694	0.72592	0.896066	2.36388	2.20198	2.31572	2.51781
Rexo5	0.148244	0.635595	0.847952	1.20215	1.36701	1.27005	1.60652
Zfp560	0.325398	0.266277	0.566361	0.557433	0.485191	0.59882	0.723888
Gm5617	0.227248	0.412835	0.701731	4.00485	5.11509	5.65918	5.06507
Amigo1	-0.361577	0.362838	0.660976	0.296642	0.28079	0.207037	0.246542
Cntnap2	0.366415	0.42996	0.715763	0.173398	0.102904	0.18227	0.181401
Gprasp1	-0.0527948	0.590602	0.821086	5.74885	5.57816	5.51579	5.51148
Tpgs2	0.0418117	0.74986	0.907159	3.91097	4.00563	3.89912	4.33305
2610008E11Rik	-0.252845	0.446539	0.728876	0.617231	0.619239	0.670038	0.382144
Nuak1	-1.13161	0.000155753	0.00211281	0.611872	0.712929	0.31082	0.296112
Asap2	0.0343022	0.872771	0.956176	0.876629	1.05024	1.046	0.942563
Actr3b	0.203622	0.225738	0.519015	3.93738	3.97272	4.93002	4.28305
Scube3	-0.634139	0.000118252	0.00165831	1.79338	1.63606	1.12731	1.10582
Wapl	-0.277187	0.000506174	0.00581505	14.3838	15.2358	11.7711	12.8852
Tacc2	-0.297777	0.00159678	0.0149309	4.98385	4.68523	3.85983	4.08684
Pigu	0.000823899	0.995206	0.998853	8.6267	9.68111	9.68502	8.77192
Pla2g4c	0.473645	0.328094	0.631116	0.196123	0.309405	0.383063	0.318686
Znhit3	0.026008	0.823278	0.933778	22.5402	24.0992	25.7025	22.186
Hps5	0.374908	0.0253491	0.131839	1.62012	1.56116	2.13991	2.02388
Ypel2	0.31686	0.296918	0.598831	0.437	0.449856	0.563772	0.558762
Zfp960	-0.296251	0.108457	0.338086	2.93322	2.85882	2.44227	2.33423
Spin2c	0.291017	0.524581	0.781125	0.842536	0.673761	0.829393	1.00996
Ado	0.221716	0.0533225	0.220804	5.37748	4.70745	6.05831	5.84563
Ppp1r26	0.319846	0.221302	0.513766	0.591152	0.504893	0.705091	0.680279
Mreg	-0.0670488	0.377433	0.673035	32.3557	31.3767	31.5098	29.9245
Ajm1	0.249205	0.762227		0.0820217	0.0458948	0.0805591	0.0749111
Zcwpw1	0.526888	6.77296e-06	0.000126879	10.2515	10.8198	13.8592	16.7356
Iqsec2	-0.255564	0.578689	0.812402	0.224488	0.217234	0.174973	0.202615
Txlna	-0.0582465	0.434107	0.719479	16.1822	16.6639	15.8909	15.943
Smg7	-0.234118	0.00136323	0.0130775	16.9032	16.4096	14.2131	14.3894
Arhgap30	-0.625735	0.00248269	0.0214837	1.68913	1.47689	1.08447	0.983851
Eif2a	-0.0884535	0.215053	0.506743	44.3982	44.2904	43.3362	40.8795
Syne2	-0.307866	0.147215	0.405362	0.260914	0.321587	0.222989	0.25163
Lmtk3	-0.196921	0.320117	0.622506	2.03907	1.56125	1.37845	1.80306
Rsrc2	0.189364	0.0438733	0.195224	29.2305	28.029	36.2222	29.759
Aebp2	-0.184235	0.0352021	0.167469	8.25449	9.16082	7.82625	7.63367
Itgb4	0.238801	0.392521	0.686805	0.544636	0.485758	0.4959	0.739375
Phactr1	-0.456035	0.549012		0.1299	0.0542715	0.0844373	0.0564721
Parl	-0.155961	0.0519205	0.216933	50.5051	53.4761	46.3063	47.8208
Patj	-0.29448	0.238288	0.533226	1.27065	1.19964	1.0658	0.968466
Zfp69	0.051363	0.872559	0.956173	1.05345	0.911858	1.20044	0.863252
Aga	0.867162	3.74824e-05	0.000593735	3.34498	3.40139	7.0895	5.38737
Ifit3b	-2.65554	0.000650908		0.450478	0.40992	0.068256	0.0698176
Rpl34	0.133986	0.566436	0.804186	8.42527	8.30542	9.68366	8.85684
Mtus1	0.293737	0.0426674	0.191717	2.05663	2.2084	2.34	2.93289
Zmiz2	-0.142175	0.0810963	0.284606	27.3549	27.4319	23.3813	26.7226
Erbin	0.159217	0.382472	0.677995	1.03953	1.09279	1.29169	1.11249
Zbtb9	-0.0727809	0.622919	0.840855	4.20247	4.79125	4.47017	4.14988
Epb41l1	-0.0868398	0.402271	0.693257	4.30632	4.37171	4.09068	4.15729
Phactr3	-0.579085	0.502629		0.0977755	0.0696306	0.0814817	0.0303076
Adam22	0.134963	0.742236	0.903483	0.422289	0.48797	0.564281	0.453063
Zdhhc23	0.0531787	0.863889	0.952592	0.41673	0.385138	0.383378	0.452019
Rffl	-0.154142	0.218378	0.51046	5.31877	5.47416	5.17718	4.60598
Slc7a6os	0.775636	4.77569e-18	1.08096e-15	22.5105	23.4222	38.3579	40.991
Zfp251	0.0670628	0.76345	0.912579	1.28577	1.76571	1.51905	1.67911
Pnma8a	-0.23916	0.723121		0.16448	0.109564	0.0923127	0.133053
Slc25a42	1.10623	5.25829e-05	0.000805899	0.598448	0.741704	1.35522	1.55811
D8Ertd738e	0.553921	4.84491e-12	3.0295e-10	89.8196	85.1748	126.779	132.7
Maneal	0.225437	0.342199	0.643135	1.33545	1.59224	1.84574	1.598
Zfp58	0.218487	0.439383	0.72366	1.04314	1.36953	1.53706	1.28163
Tceanc	0.114566	0.722414	0.894263	0.492148	0.545061	0.589745	0.53814
Armcx6	0.938807	0.0367053	0.172414	0.398927	0.370768	0.684617	0.821316
Pramel20	1.29073	0.0906934		0.0850069	0.153672	0.26974	0.300995
Fndc3c1	-1.30635	0.000792662	0.00843412	0.685184	0.404245	0.229356	0.219941
Trp53rka	-0.0860666	0.567203	0.804644	6.01015	6.88643	6.08755	6.13277
Akirin2	-0.0137014	0.887332	0.9605	23.6841	26.9797	26.4421	24.1488
Rtn1	-0.46334	0.108109	0.337653	1.99193	2.15948	1.51177	1.52361
Daam2	0.271305	0.802076		0.0273471	0.0297537	0.0199411	0.0437085
Asap3	0.0966299	0.558169	0.80096	2.29073	1.74355	2.11058	2.26303
Plekhn1	0.218399	0.541855	0.791791	0.713138	0.922909	0.78197	1.1278
Bnip2	0.287464	0.0236124	0.124989	2.58385	2.88223	3.47102	3.25507
Nol10	0.022904	0.76142	0.911995	24.2221	24.8029	25.1819	25.0834
Scaf1	0.0506495	0.547864	0.794778	25.8274	26.0674	24.9949	29.2468
Ccdc177	-0.370668	0.760568		0.0124799	0.081469	0.0117002	0.0558501
Cdsn	0.460181	0.131614	0.379475	0.840992	0.796722	0.980755	1.30481
Thoc6	-0.0231884	0.7912	0.92222	30.2228	29.3564	29.659	29.6012
Zfp975	0.158052	0.372943	0.670217	2.21913	2.49236	2.69753	2.59168
Dync2i2	0.0281676	0.78465	0.920278	15.1762	15.8313	15.8665	16.0335
Zfp760	0.42503	0.0257004	0.133109	1.30236	1.35944	1.79119	1.81965
Bbs12	0.48677	0.0993427	0.321721	0.823865	1.05354	1.40371	1.24823
Zc3h14	-0.0512884	0.542179	0.792036	16.99	16.4232	16.4597	16.1174
Mxi1	-0.276861	0.135781	0.386496	3.3095	3.76973	3.38125	2.50566
Pde2a	-0.596263	0.0267955	0.137507	1.10684	0.866196	0.632259	0.684519
Zfp658	0.356199	0.415517	0.70374	0.268231	0.376734	0.355618	0.478077
Zfyve26	-0.05744	0.65822	0.859856	2.22214	2.29641	1.95417	2.42573
Il4ra	0.681797	0.0885196	0.300344	0.177732	0.277754	0.360185	0.371869
Dab2	-0.060421	0.863769	0.952563	0.501536	0.517203	0.563333	0.418225
Bud31	0.14373	0.115859	0.351516	59.6664	56.457	62.9681	66.6155
Kbtbd8	-0.192448	0.210502	0.500455	2.64903	2.7805	2.65127	2.14061
Whrn	-0.0655135	0.789056	0.921135	1.01647	0.953586	0.89196	1.00705
Naaladl1	0.595977	0.020501	0.113179	1.08917	1.02628	1.54774	1.67512
Unc13d	-0.0547099	0.892232	0.962346	0.366172	0.368801	0.305151	0.401313
Armcx5	0.0266965	0.880225	0.958477	2.81739	3.13839	3.36976	2.75002
Septin11	-0.333506	1.34938e-06	2.89177e-05	27.2862	27.8407	22.9275	21.2409
Mief2	0.0229155	0.88302	0.959479	4.10387	4.248	4.05356	4.49473
Brsk2	0.413049	0.55658		0.0699096	0.130392	0.133165	0.127698
Txnip	0.529767	1.2501e-13	1.03751e-11	36.3712	38.9872	57.0541	52.7307
Dock11	-0.637026	0.00148949	0.0140793	1.0891	1.124	0.752016	0.684342
Nrsn2	0.146773	0.584837	0.817137	2.03216	2.211	2.31044	2.43754
Slc25a51	0.0681463	0.574944	0.80955	3.94785	4.26565	4.38962	4.28433
Slc38a8	1.02465	0.0502994	0.21256	0.247021	0.185272	0.374482	0.551054
Cep44	0.755894	3.27514e-10	1.48386e-08	11.14	10.4885	19.2679	17.6721
Slc10a7	0.671765	1.68147e-07	4.49288e-06	3.57207	3.53816	5.90045	5.5362
Ficd	-0.271462	0.327431	0.630505	0.981931	1.12318	0.939593	0.822204
Mdc1	0.0635711	0.420436	0.70792	8.26962	8.43145	8.97706	8.64455
Ppp1r13l	0.00747159	0.962221	0.98878	3.69769	3.19549	3.41715	3.59664
Mrps33	0.085116	0.826564	0.935492	1.62014	1.49991	1.8227	1.48776
Xkr7	-0.0365159	0.97331		0.0354715	0.0992395	0.0506749	0.0907099
Trex1	0.117376	0.562004	0.803168	5.05121	6.06932	5.84345	6.27599
Birc5	-0.0714629	0.319949	0.622488	33.4787	33.7219	31.2514	33.2874
Nsrp1	0.00308515	0.979792	0.994176	9.07384	7.47343	8.86002	7.91719
Slc25a47	0.648634	0.135814	0.386501	0.532092	0.694702	0.905016	0.992641
Pgbd1	0.143986	0.717895	0.892213	0.387875	0.494902	0.523425	0.450863
Zfp708	0.25607	0.354843	0.654099	1.03438	1.12423	1.39455	1.21179
Zbtb18	-0.0776091	0.748626	0.906547	1.17667	1.21407	1.33675	0.942041
Mdk	0.619245	5.66262e-13	4.20292e-11	131.613	117.077	180.185	205.665
Hacd1	-0.578023	0.109235	0.339776	2.88926	2.141	1.67894	1.71735
AU022252	-0.0668827	0.656662	0.858743	6.73818	6.09273	5.99927	6.38161
Hspb6	0.48539	0.155713	0.419314	1.24187	1.21604	1.88872	1.58789
Hs3st6	0.0909011	0.919385		0.12253	0.319953	0.236713	0.256371
Ankrd6	0.452772	0.0278384	0.141114	0.989006	1.21909	1.41082	1.61791
Cxcl12	0.526318	0.254233	0.551914	0.15252	0.154879	0.248154	0.201208
Fut10	1.10356	0.00161817	0.0150948	0.326031	0.366272	0.672931	0.824053
Ehmt1	-0.115743	0.184524	0.464072	9.51866	10.1571	9.39064	8.92184
Rims1	-0.808275	0.122949	0.364823	0.140216	0.207296	0.121145	0.0764594
Acd	0.662152	2.00793e-09	8.11108e-08	13.4821	12.2973	21.3236	19.9439
Smim19	0.626519	0.00226539	0.0199052	3.59806	2.93448	5.31223	4.90246
Adcy5	-0.226499	0.694579	0.879915	0.199722	0.0843628	0.178677	0.0675981
Zfp787	0.353644	0.220131	0.512463	1.40173	1.22323	1.82484	1.56942
Lrrn4cl	0.102174	0.824923	0.934688	0.343335	0.455156	0.442385	0.398476
Mterf1a	0.0126493	0.959607	0.987663	2.81841	2.62279	2.62359	2.91364
Usp13	-0.0884739	0.697995	0.881075	0.94101	1.16332	0.955737	1.04152
Tgfbrap1	0.246533	0.262048	0.561359	0.913662	0.972214	0.946142	1.30918
Ttf2	-0.124327	0.176272	0.452163	9.05751	9.35576	8.8171	8.23458
Tmem263	0.193284	0.233996	0.528115	2.31869	2.59076	3.01656	2.63482
Ctc1	0.232983	0.00229388	0.0201233	18.7112	18.9185	21.5687	23.0612
Npcd	-0.302338	0.202608	0.48972	0.99273	1.069	0.77231	0.912694
Osm	-1.1408	0.0558998	0.227961	0.425354	0.536519	0.198264	0.239672
Wdr91	0.225501	0.119268	0.357857	5.12902	4.3527	5.70487	5.50748
Prkaa1	-0.00817045	0.946506	0.982774	3.9005	3.90901	3.98254	3.85468
E2f8	-0.260341	0.00932418	0.062392	9.0122	8.96114	7.74972	7.3976
Pfdn4	0.124036	0.277005	0.578053	26.2439	27.7901	28.5258	30.9037
Sesn1	0.0759752	0.698117	0.881148	2.44184	2.55459	2.96667	2.3602
Dtx3l	-0.503074	0.0066477	0.0475247	2.00092	1.91692	1.62993	1.1657
Nrp	0.00215749	0.989059	0.996503	9.04752	8.36078	8.90087	8.71388
Tmprss13	-1.60549	0.00269567	0.0229497	0.505345	0.465728	0.0743174	0.249772
Lman2l	0.123562	0.432599	0.718236	4.23512	4.21477	4.70666	4.58026
Utp18	-0.148341	0.0675148	0.257572	23.6124	24.631	22.5596	21.3676
Rpp38	0.328498	0.0431905	0.193158	8.72599	7.92763	10.4051	10.746
Arhgef39	0.0665619	0.665682	0.863365	4.36404	4.89553	5.21114	4.55944
Uspl1	-0.0270638	0.72248	0.894263	28.912	26.7411	27.6735	27.5178
Zfp930	0.559293	6.84206e-05	0.00101953	4.04489	4.25117	6.78179	5.54721
Dync1li2	0.391287	0.00017747	0.00236638	4.96766	5.13281	6.69968	6.67072
Rsad1	0.57119	0.206654	0.495521	0.215289	0.220542	0.281539	0.368446
Grm4	0.289282	0.717348		0.098773	0.0897103	0.123469	0.10433
Rasl10b	0.0686754	0.835711	0.940218	0.599616	0.6438	0.54243	0.761644
Zfp182	-0.014325	0.956117	0.985923	0.565837	0.714538	0.562373	0.711636
Mrs2	0.107877	0.675728	0.868621	1.51933	2.06699	1.71567	2.14672
Cpsf6	-0.0820046	0.282841	0.583169	11.3575	12.0121	11.2642	11.0112
Tcaim	0.226565	0.422464	0.709191	0.82473	0.988027	1.16689	0.973408
Neurl4	-0.0956297	0.231221	0.524636	13.0811	12.9621	11.9881	12.624
Ric8b	0.207451	0.18491	0.464786	2.24517	2.4199	3.04425	2.38805
Inip	0.126409	0.241979	0.53658	7.39241	7.46462	8.45555	7.90594
Pard3	0.329663	0.0504412	0.213056	1.78342	1.92536	2.44692	2.24674
Ercc6l2	0.0645048	0.578748	0.812443	3.49997	3.79631	3.89674	3.79267
Trim6	-0.0913311	0.16517	0.434677	38.4066	39.1779	37.681	35.8284
Zfp57	0.0506319	0.467535	0.743345	138.293	130.616	134.787	146.394
Tmem151b	0.11219	0.746764	0.905854	0.384826	0.369435	0.367858	0.455871
Syna	-0.0150752	0.983148		0.150529	0.147399	0.129364	0.168412
5730409E04Rik	0.691639	0.0413841	0.187698	0.568534	0.503241	0.921483	0.843996
Grhl3	-0.272012	0.0279151	0.141372	7.27398	7.16629	6.36675	5.71575
Lingo3	-0.235702	0.607829	0.832143	0.355282	0.364832	0.389223	0.224585
Zscan4c	0.978038	2.94977e-16	4.18592e-14	7.70787	6.56173	13.7806	14.6906
Capn11	0.752943	0.206955	0.49593	0.177383	0.196503	0.315804	0.309283
Rsl1	0.0518708	0.893543	0.96281	0.7801	0.816557	1.034	0.610514
Lipo3	0.607563	0.0111661	0.0718218	1.42018	1.20871	2.35693	1.71673
Gm973	-0.79393	0.168816	0.44032	0.27248	0.225476	0.1775	0.122677
Tvp23a	0.131459	0.238433	0.533382	6.69013	6.49681	7.24748	7.35492
Aim2	-0.240818	0.0517529	0.216564	7.55098	7.56936	6.68395	6.24689
Slc25a34	2.18115	0.000771903	0.00826138	0.1179	0.0535411	0.352427	0.471915
Ccdc92b	-0.0884172	0.675034	0.868054	1.3074	1.46502	1.36406	1.25925
Zscan26	0.382463	0.0104828	0.068325	2.51978	3.04681	3.80475	3.49513
Otulin	-0.188004	0.11553	0.351024	16.9458	18.8947	14.5812	17.1183
Macrod2	0.0276289	0.953473	0.985051	0.776028	0.535268	0.42097	0.936088
Ankrd13c	0.140907	0.132666	0.381364	8.22991	8.13158	8.96883	9.24738
Fam169b	-0.681302	0.00136039	0.0130594	2.49136	2.27054	1.42891	1.57403
Maml2	-0.00854203	0.986278	0.995327	0.175473	0.16278	0.112559	0.221413
Amt	-0.175422	0.026551	0.136587	31.9302	32.1653	29.0114	28.2714
Eif1ad7	1.16757	6.50381e-13	4.75004e-11	3.29005	3.25328	7.34871	7.47868
Shf	0.347163	0.0458293	0.200828	4.88334	4.98968	5.80575	6.87744
Dyrk2	-0.285948	0.335496	0.63743	1.46642	1.70463	1.01301	1.62007
Zfp985	-0.0941042	0.252411	0.549789	19.9871	21.021	19.6824	19.0878
Abi3bp	-0.122097	0.891931		0.0676007	0.0696788	0.066713	0.06369
Scn2b	0.411017	0.488161	0.757164	0.120389	0.117885	0.142965	0.177023
Tektip1	-0.265001	0.292065	0.593458	5.41326	7.22348	5.47311	5.06394
Snx13	-0.350117	0.0938795	0.311582	1.05309	0.95031	0.832426	0.760949
Ttll4	0.249285	0.00654768	0.0469076	4.53371	4.8484	5.51149	5.73234
Espl1	-0.00756151	0.918997	0.971233	16.0423	15.7888	15.3792	16.5841
Wdr7	-0.228173	0.190956	0.473507	1.3813	1.20397	1.17452	1.0602
Entrep3	0.0378353	0.837298	0.941029	2.15172	2.466	2.49251	2.28617
Cenpj	0.21001	0.265206	0.565514	1.44572	1.40947	1.6612	1.67499
Zfyve28	0.704885	0.000466822	0.0054267	1.08937	1.16944	1.88051	1.83952
Rap1gap2	-0.115625	0.763206	0.912579	0.247522	0.243743	0.254345	0.201158
G2e3	0.178891	0.117118	0.354049	3.16852	3.0546	3.6758	3.43664
Dcaf1	-0.220791	0.0114269	0.0729003	8.85642	9.15458	7.75273	7.84598
E130308A19Rik	-0.0165121	0.93674	0.978594	1.41775	1.52805	1.46301	1.47288
Tyw1	-0.0793484	0.452423	0.732543	12.8428	11.5647	12.5669	10.7989
Taf9	0.0967536	0.284966	0.585671	46.785	46.3633	54.4283	46.2349
Arid3c	-0.679182	0.448895		0.330796	0.102831	0.167371	0.120847
Kdm6b	0.261085	0.0202266	0.112025	3.12835	3.25434	3.69861	4.02065
Rasef	-1.1219	0.200046		0.116858	0.0520128	0.0298793	0.05773
Cox17	-0.0460035	0.685462	0.874403	51.254	52.2546	49.5134	51.7445
Abtb3	-0.104861	0.551711	0.796443	2.11739	2.01509	1.92932	1.95556
Zscan18	-0.0126731	0.946532	0.982774	1.7629	2.18609	1.92246	2.0136
Lamp2	0.299125	0.123951	0.36648	3.22551	3.29444	4.35995	3.74931
Ddi2	-0.0853738	0.305219	0.607156	16.1344	16.8978	16.2757	15.1419
Zdhhc18	-0.0742698	0.397388	0.689646	18.739	20.2124	17.9866	19.3252
Foxred2	-0.00934886	0.945574	0.982264	2.82446	2.90518	2.88906	2.85249
C2cd3	-0.0745309	0.54069	0.791005	2.8158	2.71178	2.46852	2.83386
Dppa4	0.179669	0.0169826	0.0985004	70.6532	70.0431	77.1335	83.7614
Izumo1	-0.0761223	0.939933		0.148141	0.157148	0.150459	0.153902
Sp3	-0.0209088	0.854221	0.949009	7.03219	7.35532	7.91429	6.3955
Rtl8b	0.209311	0.500689	0.767197	1.79373	1.67883	1.86401	2.1968
Ldoc1	0.0745322	0.833222	0.93916	1.282	1.35242	1.46152	1.29825
Kbtbd7	0.291711	0.21839	0.51046	0.996981	1.02867	1.50763	0.988044
Anks6	-0.117566	0.886918		0.0578577	0.141007	0.0819672	0.108502
Adamts15	-0.0904879	0.893744		0.106584	0.0786538	0.0521349	0.124431
Nxf3	-0.15416	0.704622	0.884589	0.50082	0.605438	0.359394	0.640364
Fbxo10	0.154784	0.533851	0.786446	0.845704	0.736103	0.830888	0.948547
Pla2g4f	-0.393911	0.453046	0.732944	0.319096	0.277742	0.21052	0.24367
Nufip2	0.0460277	0.549775	0.79589	7.00852	7.08671	7.61629	7.07526
Trappc1	0.0875703	0.460439	0.738277	27.536	26.5388	27.8944	30.1719
Crls1	-0.0824852	0.514883	0.776646	9.27637	8.81935	8.67876	8.60943
Add1	0.0347979	0.642967	0.851353	19.9978	19.3475	20.3365	20.3671
Bcat1	-0.928083	2.68752e-44	4.90705e-41	23.4757	23.1432	12.6035	12.1363
Diras2	0.484017	0.610881		0.031566	0.0618191	0.078917	0.0565058
Dcun1d2	0.595203	0.00223117	0.019693	2.03531	1.60977	2.82185	2.7589
Brd9	0.150467	0.190984	0.473534	10.3212	9.1594	10.5405	11.3127
Fam149b	-0.3097	0.0901392	0.303742	3.2321	3.5153	2.86153	2.61469
Larp4	-0.0154584	0.873269	0.956493	7.41415	7.44759	8.0966	6.74717
Shc2	-0.184196	0.385435	0.680171	1.35662	1.51234	1.33056	1.20533
Snx32	0.0496976	0.921979	0.972625	0.452415	0.569195	0.524403	0.525883
Cep170b	-0.09911	0.38863	0.68304	4.13916	5.12822	4.3454	4.36271
Ankrd28	-0.197656	0.053802	0.222084	5.98181	6.61842	5.55864	5.51382
Pdp2	0.526659	0.00207923	0.0185552	1.36978	1.51349	2.35966	1.83189
Rabl6	0.117672	0.173397	0.447764	15.3712	14.7272	16.2227	16.7706
Inpp4b	1.26583	0.0838645		0.0436101	0.0813394	0.190799	0.115505
Xirp2	-0.307828	0.512743	0.775296	0.0826594	0.115415	0.0932812	0.0675247
Tsku	0.126923	0.512958	0.775296	2.45136	2.80044	3.17371	2.60965
Pcnp	0.142753	0.171967	0.445643	11.1624	11.4265	12.8859	12.2823
Cdkl5	-1.2418	0.0687688		0.178578	0.277563	0.111614	0.0869851
Zfp873	0.101162	0.6962	0.880339	1.67893	1.34174	1.57591	1.696
Carmil3	-0.200693	0.690128	0.877534	0.233171	0.191244	0.156946	0.214049
Cpa2	0.0695582	0.870185	0.954907	0.919726	0.900598	0.953717	0.9889
Zbtb45	-0.00274049	0.99127	0.997169	15.279	15.4318	12.8713	18.0298
Mctp2	-0.568584	0.110383	0.341776	0.399664	0.366504	0.297377	0.225093
Gm5458	-0.216799	0.779796		0.440113	0.37709	0.29227	0.439642
Lrp3	0.458083	0.0849299	0.292697	0.6746	0.723482	1.02827	0.897771
Gm3696	-0.331404	0.723407		0.123925	0.137527	0.116182	0.079227
Triobp	-0.104201	0.313099	0.615635	12.3837	12.5157	12.4016	11.0004
Gal3st3	0.388471	0.0563246	0.229253	1.99131	2.19248	2.63813	2.8871
Zfp607a	-0.132251	0.624998	0.842112	0.97833	0.945211	0.983247	0.790583
Rps23rg1	0.385576	0.273403	0.574383	1.05414	0.910124	1.33896	1.27176
Cebpz	0.0255176	0.741426	0.903057	26.7658	24.457	27.3391	25.347
Adarb1	0.169708	0.485279	0.7553	0.550744	0.618277	0.727564	0.600169
Gm128	0.277958	0.421215	0.708316	1.27208	1.07466	1.5083	1.37537
Zfp62	0.413675	0.00404036	0.0319819	2.44213	2.65493	3.51897	3.32578
Apol7b	0.495213	0.5764		0.111181	0.0967719	0.138979	0.157954
Gm14325	0.245386	0.104447	0.331394	2.33121	2.86412	3.09768	3.09663
Rhox10	0.0189542	0.986014		0.254267	0.237123	0.317842	0.185779
Ankrd34a	0.139879	0.7374	0.901747	0.467343	0.596298	0.74352	0.434589
Timm9	0.0984633	0.409991	0.699608	19.0957	19.1908	20.2237	21.2089
Ttbk2	-0.346654	0.150018	0.409396	0.387979	0.469561	0.315626	0.365368
Septin10	0.046831	0.856269	0.949491	2.18086	2.57849	2.36344	2.58506
N4bp2	-0.198098	0.470086	0.744784	0.564439	0.561325	0.504406	0.491377
Rfx4	-0.904372	0.219092		0.132925	0.146145	0.0787077	0.0760357
Bod1	-0.00867468	0.932116	0.976692	24.0554	24.6741	26.1778	22.72
Trp53i13	0.102397	0.612099	0.834703	5.35557	4.43282	4.69887	5.94337
Ddx49	0.634594	1.0527e-16	1.62888e-14	33.8039	34.8611	51.8005	55.7774
Cyb5d2	-0.368731	0.407673	0.697798	0.49179	0.611868	0.412247	0.45127
Zfp667	-0.181553	0.497763	0.765197	1.08905	1.03097	1.14147	0.75606
Rbfox3	-0.58628	0.454157		0.137581	0.155677	0.120387	0.082094
Qsox1	-0.0699982	0.729165	0.897303	1.9788	1.84537	2.04337	1.62914
Zfp563	0.11805	0.702899	0.883791	0.436573	0.320094	0.438198	0.393226
Rc3h1	-0.226249	0.132159	0.380406	1.24907	1.13878	1.11215	0.954108
Pbx4	0.976735	0.000461723	0.00537427	1.71282	1.7309	2.72172	4.08318
Pik3r1	-0.868181	0.00193835	0.0175322	0.733491	0.726705	0.480555	0.322674
Lrig2	0.32191	0.0584576	0.234894	1.02162	1.09609	1.3058	1.36509
Ntrk2	0.433453	0.455901	0.735002	0.0644433	0.0677204	0.0805562	0.0944576
Rhox1	-1.29905	0.00815292	0.0563442	1.6298	1.84143	0.959884	0.480903
Atf2	-0.0485455	0.612792	0.834817	8.00069	8.28052	8.12816	7.7533
Arl14ep	0.105441	0.419397	0.707316	4.41152	4.66417	5.06798	4.78026
Cracr2b	0.38988	0.288435	0.589394	0.900508	0.919189	1.00286	1.40263
Ccdc93	-0.141296	0.4701	0.744784	0.889496	0.965711	0.801326	0.892409
Zfp78	-0.138487	0.746498	0.905854	0.239907	0.313224	0.289052	0.221749
Cxadr	-0.362405	0.0958241	0.315211	0.962351	1.07604	0.783473	0.814018
Mbp	-1.41648	0.00313285	0.0259772	0.347507	0.297512	0.135303	0.109262
Trp53i11	-0.388282	0.000444512	0.00518496	10.6005	9.90382	7.93271	7.912
Vegfa	-0.333956	0.13359	0.382956	1.54219	1.45419	1.18783	1.21501
Tpd52	-0.0802107	0.255084	0.552884	20.0523	20.0895	18.8232	19.5062
Dffa	-0.284664	0.039076	0.180657	6.1563	6.96746	5.68106	5.15507
Stx3	-0.18474	0.346918	0.647457	2.2193	2.13596	2.01656	1.85876
Pja2	0.0518098	0.80481	0.926428	1.32332	1.33108	1.62498	1.15044
St6galnac6	-0.240331	0.153948	0.416155	4.09347	4.59819	3.41372	4.0012
Dclre1b	0.0895323	0.636041	0.848137	1.60537	1.91769	2.06089	1.70773
Tapbp	-0.569517	3.21438e-06	6.38863e-05	8.79787	8.15427	6.01179	5.54143
Klc1	-0.30349	0.0113884	0.0727392	8.72183	9.48938	7.32561	7.54443
Rtn2	-0.237953	0.289556	0.590759	4.96766	4.59689	4.41723	3.79798
Miip	0.485723	0.000122304	0.00170577	10.3851	10.5966	13.2862	16.3453
Serinc4	0.250193	0.122931	0.364823	3.33556	3.40295	4.03353	4.07015
Adcyap1r1	-0.797584	0.233297	0.5271	0.125002	0.136974	0.0279029	0.128436
Zfp943	0.117525	0.73983	0.902186	0.633338	0.623448	0.741427	0.636276
Skic8	0.0378042	0.68989	0.877395	42.0836	37.9925	44.4386	38.6576
Orc2	-0.0784647	0.316901	0.619328	22.1544	22.7811	22.0333	20.9313
Insyn2b	0.146261	0.83852		0.0766763	0.0734132	0.0926529	0.0817005
Eno1b	-0.135322	0.0186619	0.10558	227.785	227.449	208.045	210.345
Sufu	0.091007	0.458784	0.736873	3.87825	4.43599	4.52474	4.3949
Bclaf1	-0.0606639	0.337296	0.638393	32.1491	32.7346	32.0062	30.7914
Src	-0.242264	0.0401079	0.183999	5.57673	5.88242	4.75564	5.01916
Depdc5	0.120445	0.255893	0.554042	3.12925	3.02691	3.35135	3.40656
Hmga1	-0.516208	4.04055e-09	1.49544e-07	93.4436	78.1213	62.6377	58.6179
Spag9	-0.0571623	0.74243	0.903491	1.20563	1.16322	1.20221	1.09895
Btbd3	-0.204712	0.236477	0.531089	1.87134	2.13009	1.86916	1.63934
Crebbp	-0.280466	0.0145902	0.0879781	3.30606	3.25288	2.61217	2.83849
Camk2d	0.267918	0.469496	0.744408	0.305868	0.241538	0.370011	0.305935
Aptx	0.178794	0.196918	0.481727	2.52777	2.27983	2.68675	2.82412
Pus1	0.033274	0.695253	0.879915	27.0262	26.7627	27.3386	28.2564
Lhx9	0.0277193	0.974796		0.04462	0.07282	0.0662345	0.0499209
Dmbx1	0.914664	0.194509		0.0547123	0.116078	0.188078	0.131169
Prrx1	-0.442932	0.640381		0.0703537	0.0743581	0.0460661	0.04712
Ankrd12	0.102029	0.720743	0.893486	0.305532	0.305161	0.360919	0.30081
Slc23a4	-0.342168	0.551168	0.796381	0.395792	0.325051	0.215457	0.350985
Ccdc141	-0.275824	0.441304	0.724824	0.300221	0.306759	0.25563	0.250351
Dram2	0.410403	0.147267	0.405362	0.945096	1.19741	1.55889	1.28708
Nr2c2ap	0.558391	2.65212e-08	8.2354e-07	21.6552	22.054	31.4199	33.4988
Rfxank	0.52997	8.06182e-09	2.71918e-07	8.69586	8.94894	12.7155	12.992
Zbtb43	0.286812	0.0259401	0.134072	3.25502	3.86603	4.6526	4.0847
Trim26	-0.174044	0.0449164	0.198351	15.6938	15.2207	13.8186	13.8611
Cadm1	-0.392507	0.0185991	0.105334	2.38572	2.56835	2.04852	1.76606
Il1rl1	0.661003	0.0294453	0.147216	0.3502	0.382712	0.612866	0.553916
Gm527	0.00569699	0.987772	0.995808	1.06421	1.1927	1.2008	1.05968
Szrd1	-0.156037	0.0409512	0.186431	24.7038	24.1315	21.7658	22.4875
Snx22	0.0507673	0.522556	0.78039	33.0366	32.5288	32.6658	35.8922
Otud7b	-0.00928377	0.939769	0.979911	2.16385	2.22512	2.22368	2.17481
Ccdc50	-0.0243321	0.857255	0.949893	2.0139	2.24011	2.12995	2.08275
Cant1	0.187439	0.0992611	0.321571	6.92629	7.0219	7.84547	8.18044
Cdc6	0.0988989	0.325535	0.628401	8.60366	9.63549	10.6283	9.0748
Dnm1l	-0.173843	0.0473535	0.20466	16.0302	16.1505	15.4545	13.339
Dnajc19	-0.195589	0.149231	0.40851	11.8811	11.743	10.7046	10.1506
Ensa	0.0521959	0.577342	0.811366	15.9584	15.8137	16.4388	16.8381
Entpd5	0.274279	0.372656	0.670217	0.514937	0.397599	0.539867	0.576998
Npnt	0.0531675	0.911769	0.969395	0.184617	0.241037	0.249388	0.190368
Pik3cd	-0.531315	0.00436864	0.0339428	1.65629	1.91238	1.19014	1.3002
Pknox2	-0.0132682	0.980103	0.994176	0.248256	0.217771	0.169711	0.297589
Slc16a6	0.167415	0.226513	0.51962	3.68701	3.84846	4.76766	3.76063
Vrk1	-0.168028	0.0620628	0.244607	13.646	13.2444	12.7405	11.4407
Magi1	-0.174014	0.222432	0.515089	1.71315	2.00429	1.6612	1.65864
Psme2	-0.328934	0.107631	0.337212	8.32531	8.15217	6.20916	7.02212
Atad5	0.127754	0.270047	0.570506	2.71332	2.87552	3.18596	2.97095
Pdzd4	-0.00581134	0.937377	0.97891	22.4858	22.3491	22.0338	23.0424
Unc13a	0.299531	0.0519576	0.216989	1.20043	1.22352	1.44861	1.55927
Urb2	0.270314	0.000359883	0.00433988	11.7746	12.5726	14.6511	14.969
Nova2	-0.521893	0.0145301	0.0877317	0.832636	0.706183	0.563437	0.519743
Lonrf2	0.116942	0.876681		0.0718547	0.044301	0.0798406	0.0459378
Usf3	-0.205248	0.312245	0.614705	0.567127	0.572742	0.4259	0.572044
Mex3a	-0.230566	0.0199933	0.111052	5.33855	5.58294	4.66198	4.72919
Ate1	0.0719162	0.588823	0.81973	3.14492	2.85698	3.18555	3.19164
Zswim5	0.0367689	0.888646	0.961068	0.634521	0.665408	0.586119	0.759185
Zmynd15	0.235676	0.563804	0.803572	0.400863	0.463211	0.604765	0.424184
Gm5796	-0.933248	0.250317		0.28836	0.217964	0.113829	0.164947
Zfp114	0.461899	0.509441		0.0883238	0.172974	0.154571	0.197634
Usp32	0.0387104	0.779628	0.918623	1.90316	2.17287	2.1426	2.07962
Trim38	0.637063	0.395452		0.307408	0.145947	0.267825	0.428795
Specc1	-0.504947	0.0171454	0.0992355	1.05479	1.03418	0.860348	0.624874
Rilp	0.887334	0.441318		0.12069	0.0606053	0.162472	0.130577
Tceal3	0.331214	0.770517		0.222161	0.0644565	0.246852	0.12625
Safb2	-0.02563	0.746714	0.905854	24.4678	24.5221	23.241	25.326
Sec23ip	0.0146079	0.865907	0.9532	9.88391	10.2088	10.3424	10.1442
Man1b1	-0.000431985	0.99639	0.999248	9.27519	9.96735	9.82824	9.58266
Kcp	0.507858	0.215478	0.507222	0.265873	0.199412	0.328815	0.34357
Mettl17	0.196946	0.108247	0.337776	12.7054	11.9872	13.2689	15.3181
Zc3h18	0.53177	8.81283e-14	7.54268e-12	21.1429	22.2046	32.2698	30.9549
Mcat	-0.0598969	0.635284	0.847746	9.01798	9.44001	8.68394	9.17994
Ndufs5	0.265379	0.69937		1.00666	0.710429	0.986275	1.1132
Prr7	-0.356461	0.105296	0.333264	3.97707	4.01657	3.13721	3.17016
Dkc1	0.0210575	0.780529	0.919009	43.2089	42.1545	46.4881	41.0067
Nudt10	-0.110624	0.85784		0.400301	0.276689	0.333593	0.331189
Gsk3a	-0.0935052	0.239407	0.534312	34.2441	32.4897	32.74	30.4524
Lin28b	0.565458	5.78565e-05	0.000878367	2.01008	1.94754	2.88433	3.03805
Mrpl41	0.0973814	0.456868	0.735478	6.11639	6.03914	6.682	6.45073
Kcnh8	-0.981321	0.13113	0.3784	0.186299	0.192909	0.148561	0.0533915
Smg1	-0.044375	0.60698	0.831697	2.99159	3.06317	2.99477	2.93197
Pecam1	0.054526	0.583831	0.816482	11.0351	10.5304	11.9938	10.6324
Pear1	0.326342	0.527692	0.782484	0.161098	0.193834	0.177686	0.282724
Klhdc9	0.0812872	0.804817	0.926428	1.23933	1.41003	1.31682	1.50541
Cfap119	0.0329139	0.825193	0.934759	7.13581	7.23202	6.2182	8.61023
Lrrc14b	0.425242	0.423805	0.710506	0.190032	0.346043	0.331313	0.377259
Rnf17	-0.769716	2.49754e-13	1.95436e-11	6.99973	7.51644	4.49237	4.09411
Ntrk1	0.236042	0.747555		0.197491	0.118469	0.146788	0.211569
Bbs1	0.409324	0.0477218	0.205763	0.850564	0.840899	1.13391	1.13785
Krtdap	-1.07851	0.247284		0.664471	0.985837	0.30204	0.424807
Commd6	0.245575	0.20078	0.486892	6.94292	7.04575	8.97475	7.7274
Rnf149	-0.0917907	0.476485	0.749912	8.01815	8.65241	8.69409	7.09271
Rmdn3	-0.141193	0.241505	0.536181	9.23142	9.37156	9.04929	7.99445
Spindoc	-0.0764412	0.414599	0.703055	12.205	12.3092	11.4344	12.0328
Sdhaf1	-0.194776	0.180967	0.458961	13.6412	13.0742	11.5931	12.0039
Ecscr	-0.150086	0.803072	0.92593	0.62159	0.616778	0.761467	0.397392
Rnf166	0.800858	4.94297e-07	1.19066e-05	4.57332	4.01736	7.3762	7.78042
Dipk2a	0.0604591	0.712415	0.889256	2.24193	2.25997	2.42448	2.30661
Cfap96	1.23891	0.273571		0.0401678	0.0393324	0.119251	0.0641997
Ttc9	-0.12783	0.759197	0.911089	0.241322	0.360082	0.301661	0.253462
Plekhm2	0.327586	0.0470943	0.204097	1.98349	2.25676	2.50013	2.86217
Dnajb14	0.0331842	0.91104	0.969292	1.27365	1.65316	1.39659	1.61901
Fbxo33	0.173842	0.329967	0.632388	2.02495	2.15458	2.48143	2.27317
Zfp597	0.134162	0.605921	0.83137	0.680129	0.556976	0.621639	0.76054
Tradd	0.712939	0.00805234	0.0558464	1.92051	1.66296	3.0724	2.83733
Shcbp1l	0.957219	0.266398		0.134897	0.0792549	0.193919	0.198356
2510002D24Rik	0.177995	0.375651	0.671782	4.74957	4.31885	5.33641	5.04411
Dnajc25	0.196406	0.436867	0.721561	1.74698	2.31036	2.53205	2.14709
Selenoh	-0.0629972	0.39344	0.687567	176.664	171.593	161.765	174.813
Slc22a23	-0.643362	0.0429478	0.19245	0.483601	0.424754	0.321493	0.267013
Fam83e	-0.103108	0.917176		0.113755	0.0495065	0.0770239	0.0848466
Klrg2	0.0687173	0.887996	0.960712	0.548491	0.322644	0.421927	0.508648
Rab11fip2	0.350314	0.423892	0.710543	0.274972	0.165955	0.337238	0.23218
Usp31	0.0756743	0.642701	0.851353	0.883383	0.889184	1.00177	0.887722
Osbp	0.0302744	0.830783	0.937996	3.37182	3.0197	3.58865	3.02636
Cln6	-0.493795	7.90073e-05	0.00115776	9.9901	9.98797	7.61009	6.71562
Tmem181a	-0.272634	0.0965166	0.316574	2.22285	2.52664	2.04783	1.91879
Jrkl	0.705844	0.0799819	0.282478	0.334786	0.382461	0.616115	0.564811
Skap1	0.327617	0.712639		0.119785	0.0905429	0.157616	0.120917
Nhsl3	0.0104582	0.899064	0.964679	10.1452	10.3828	10.4937	10.3816
Naa11	0.0257166	0.878185	0.957931	2.50167	2.76002	2.81088	2.57776
Fam8a1	0.133951	0.299838	0.601962	4.25044	4.50224	5.16534	4.51792
Gtf3c3	0.0796137	0.466044	0.741786	4.8097	4.99648	5.32217	5.13718
Znfx1	-0.0791569	0.484751	0.7553	3.05564	3.11396	2.98142	2.91566
Clca4b	0.756035	0.458144		0.0459989	0.066062	0.0517501	0.152921
Ncbp1	-0.0380377	0.61849	0.837963	25.3006	26.4771	24.9058	25.9756
Usp30	0.0330742	0.833498	0.939224	3.56272	4.25151	3.95319	4.1005
Rpusd3	0.153125	0.559921	0.802171	12.8294	10.9722	11.2955	15.4563
Zfp575	0.430501	0.276048	0.577484	0.45624	0.432024	0.589116	0.628237
Pwwp2b	-0.526307	0.0195716	0.109518	2.48351	2.62779	2.04512	1.53507
Nlrc5	1.30058	0.0303368	0.150582	0.0457474	0.0597279	0.134262	0.137334
Myzap	0.186729	0.837498		0.0725517	0.165767	0.105807	0.146881
Xylb	0.0528933	0.722057	0.894158	3.08964	2.98924	3.01828	3.34309
Pls1	0.0633816	0.845701	0.945121	0.752889	0.496354	0.666249	0.657664
Ezhip	0.0255714	0.938822	0.979544	1.11282	1.21887	1.38172	1.0027
Ttc7b	-0.0815544	0.482877	0.754164	6.11038	6.63765	6.00429	6.14165
Prickle1	-0.245145	0.303254	0.60549	1.22736	1.0683	0.897072	1.06767
Slc45a4	-0.313588	0.000563748	0.00636698	5.89158	6.27637	4.97606	4.90286
Mpig6b	0.324423	0.702241		0.15263	0.0876807	0.13737	0.171738
Pdzd8	-0.188123	0.168826	0.44032	2.23268	2.51485	2.2599	1.93956
Pnrc1	-0.0567439	0.719428	0.893258	5.18225	5.58239	5.46078	4.98333
Calr4	0.46897	0.553044		0.135553	0.167664	0.240791	0.173322
Slc5a10	0.139109	0.820927		0.250648	0.263394	0.32096	0.234502
Itga1	-0.768974	0.196598	0.481138	0.117514	0.153427	0.0921702	0.0736554
Mcrip1	0.354517	0.00100599	0.0102462	21.3582	21.4744	25.9115	29.3289
Gm9	-1.78002	0.00202832	0.0181779	0.786159	0.788717	0.124134	0.338596
Vcpkmt	0.334298	0.0590436	0.236451	3.74562	3.75017	5.1693	4.39246
Yeats2	0.198377	0.0645533	0.250672	4.33552	4.76007	5.02298	5.49649
Cblb	-0.0267006	0.881601	0.958956	1.16191	1.29825	1.25931	1.17127
Cln5	0.0675995	0.621782	0.840251	5.34223	5.80136	5.98979	5.79643
Fancd2	0.159051	0.137333	0.388842	5.2109	5.64993	6.37258	5.85913
Zfp583	0.175236	0.587204	0.818753	0.805434	0.68807	0.89495	0.820068
Lemd1	0.341181	0.611146		0.435087	0.458107	0.49124	0.66399
Plekhg1	-1.21139	6.98224e-11	3.59454e-09	1.43796	1.43302	0.642988	0.611244
Pak6	-0.239506	0.417198	0.705278	0.698249	0.685898	0.640078	0.548436
Afg2b	-0.340017	0.226994	0.520158	2.39289	2.81175	2.35393	1.80916
Phactr2	-0.250457	0.444615	0.72734	0.30693	0.253653	0.222449	0.256763
Arfgef3	0.700293	0.210258	0.499961	0.0905211	0.0634696	0.0859135	0.167184
Mcu	-0.0159785	0.914585	0.970277	4.15872	3.98466	3.92286	4.20251
Stox1	1.26248	0.0342796	0.164393	0.118584	0.103216	0.276703	0.262817
Zfc3h1	0.000256819	0.998542	0.999551	1.89066	1.85781	1.95463	1.83464
Marchf9	-0.0700536	0.710112	0.888428	3.46249	4.37684	3.571	3.94315
Agap2	0.170863	0.775076	0.917046	0.129476	0.0924962	0.100774	0.153058
Gls2	-0.199264	0.124202	0.366834	7.31696	8.03425	7.22161	6.27305
Qrich2	0.0596981	0.938365		0.140573	0.200218	0.151759	0.196081
Fam120a	-0.0593989	0.443066	0.725871	15.2302	15.6698	14.5117	15.4178
Eif4e1b	0.469592	0.570096		0.23192	0.0851613	0.22649	0.231672
Slc4a7	0.126438	0.511915	0.774988	0.860509	0.804921	0.945281	0.893079
Pip4p1	-0.0102632	0.912678	0.969568	24.2087	23.8368	25.0198	23.147
Spata13	-0.44945	0.00215517	0.0191332	1.83838	2.10761	1.51912	1.3908
5031439G07Rik	-0.0365845	0.77389	0.916698	2.76704	2.71542	2.51166	2.88608
Brd1	-0.228309	0.0205622	0.113297	8.69533	9.33938	8.38968	7.14051
Gxylt1	0.000763641	0.995655	0.999047	2.00536	1.9339	2.04063	1.94428
Kmt2d	-0.06613	0.528519	0.783298	1.91084	2.05017	1.75049	2.06546
Spryd3	-0.1061	0.454114	0.733961	5.37403	5.45061	5.19739	4.94741
Ilrun	-0.0821652	0.309874	0.612493	22.8226	24.0994	21.1861	23.5232
Cryzl2	0.00688495	0.980131	0.994176	1.9722	1.95605	1.71408	2.24032
Cdc42bpa	-0.0110619	0.937824	0.979115	1.52288	1.57275	1.46802	1.62979
Slc30a10	0.239247	0.787755		0.0470485	0.0429987	0.0352873	0.0721891
Sbspon	0.638461	0.394007		0.125066	0.104504	0.168844	0.179103
Usp40	0.245835	0.182731	0.46116	1.30866	1.34476	1.70759	1.46719
Uap1l1	0.236861	0.0347682	0.166183	11.8685	11.9421	14.0379	14.2978
Ddx31	0.0385371	0.759158	0.911082	5.14314	5.57229	5.32474	5.75946
Smim26	-0.0989766	0.742473	0.903491	5.98408	6.28169	4.81145	6.7671
Kiz	0.238623	0.172788	0.446771	3.71188	3.3141	4.05798	4.33023
Zfp217	-0.075725	0.494427	0.762165	4.11103	4.38031	4.03082	4.08597
Gmps	-0.091966	0.205565	0.494047	19.9761	21.0434	19.4204	19.4177
Fhdc1	-0.368724	0.613313		0.0788062	0.0786803	0.0579472	0.0652002
Ciart	-0.108124	0.622604	0.840698	3.48986	4.58219	3.68273	3.85548
Ampd1	0.730043	0.434071		0.0590029	0.115552	0.0958822	0.21124
Elapor1	-0.270768	0.710627		0.0696176	0.10343	0.0900251	0.0491119
Ndufb6	-0.0376433	0.72197	0.894158	41.0738	45.2916	43.2851	41.5904
Shb	-0.588236	0.00478031	0.0365605	2.39063	2.40144	1.60382	1.62128
Themis2	0.163035	0.776766	0.917645	0.238098	0.282601	0.365273	0.228329
Cox18	-0.146306	0.25402	0.551609	14.8038	16.7355	13.2812	15.4194
Vsig10	0.0123748	0.937541	0.978969	2.39168	2.57336	2.60801	2.42477
Fbxl18	0.00114371	0.993485	0.998083	5.77819	5.16671	5.12281	5.96641
Pdap1	-0.157004	0.0384585	0.178647	81.4693	71.8548	69.7616	69.1856
Ccdc61	0.143422	0.259355	0.557947	9.76501	9.75047	9.87701	11.8879
Hipk4	0.105497	0.734341	0.899832	1.0307	0.91447	0.932493	1.17954
Cog7	0.0115917	0.911789	0.969395	9.89294	9.83561	9.6802	10.4035
Ppfia1	0.0197899	0.837867	0.941217	6.41964	6.47031	6.51097	6.68375
Tmem231	0.22601	0.0709847	0.265216	6.69833	5.89175	7.86085	7.03486
Gucy1a2	-0.483752	0.529428		0.0489974	0.0208886	0.0312491	0.020457
Tmem185a	-0.254419	0.197647	0.482805	2.94522	2.89137	2.74706	2.20882
Arhgef9	-0.25846	0.641502	0.850711	0.195077	0.123809	0.121926	0.155895
Gas2l3	-0.0889215	0.621151	0.839854	1.1101	1.20203	1.0643	1.12771
Tmtc3	-0.0454244	0.94645		0.118678	0.271157	0.173077	0.196005
Myrfl	0.345167	0.766741		0.0666291	0.0231977	0.0555257	0.0681552
Abcc4	-0.433102	5.55418e-06	0.000106302	7.43872	7.91105	5.97941	5.4852
Ttc38	0.203532	0.638058	0.848924	0.356115	0.258836	0.325835	0.384927
Rimbp3	0.553158	0.15061	0.410349	0.288556	0.208279	0.469209	0.275968
Mmp25	-1.12997	0.00368461	0.0297156	0.590949	0.624116	0.329359	0.235826
Zfp407	-0.173173	0.316424	0.61875	1.09219	1.24687	1.11566	0.972449
Cdc42bpg	-0.0987401	0.309004	0.611745	5.7336	6.16001	5.70208	5.49984
Sec31b	0.483412	0.408757	0.698738	0.14786	0.124102	0.193631	0.198061
Styxl2	-0.539093	4.62196e-12	2.95762e-10	21.9765	21.339	14.7512	15.355
D430041D05Rik	1.08254	0.191249		0.019009	0.0248182	0.0339455	0.0590276
Ralgapa2	-0.092827	0.653803	0.857401	0.573316	0.647473	0.55183	0.601108
Klhl21	-0.37104	0.000954319	0.00982221	8.4234	8.64527	7.32968	5.98708
Zfp568	-0.234321	0.00472961	0.0362639	10.1674	10.9531	9.5394	8.57313
Ntn5	0.968024	0.203999		0.146917	0.127877	0.271104	0.250471
Mucl3	-0.574517	0.462009		0.163304	0.171944	0.11853	0.107771
Nlrc4	-0.612282	0.0993751	0.32175	0.462211	0.645568	0.358313	0.361929
Washc4	0.140093	0.266349	0.566361	2.75988	3.09295	3.36163	3.13744
Dcp1b	0.00939232	0.963927	0.989158	1.72027	1.62753	1.62578	1.77986
Itpripl2	0.450316	0.194181	0.477413	0.223841	0.250498	0.294798	0.357763
Zfp865	0.383154	0.00233359	0.0204258	4.29788	4.1983	5.20337	5.99659
Tbc1d32	0.158101	0.555552	0.799174	0.437788	0.395134	0.475868	0.464852
Fubp3	-0.121409	0.127068	0.371769	18.9685	20.319	17.8082	18.6262
Tmem104	-0.0166028	0.933354	0.97728	1.28872	1.35234	1.33995	1.29745
Tmem88b	-0.329607	0.706319		0.102832	0.0774566	0.0889917	0.0606851
Gfod1	-0.329352	0.185921	0.466044	0.600041	0.673038	0.484582	0.540489
Treml2	0.937953	0.0236291	0.12503	0.188841	0.226668	0.418811	0.37387
Rbm44	-0.383852	0.108325	0.337867	1.3308	1.14432	0.974874	0.942287
Lgr6	0.17803	0.81714		0.0875332	0.119253	0.171265	0.0681269
Shisa3	0.143653	0.882807		0.0585057	0.057289	0.073134	0.0514299
Ceacam16	0.421336	0.461482	0.738695	0.337118	0.374121	0.453014	0.495707
Dock1	-0.404671	0.000295092	0.0036653	4.32197	4.12021	3.07272	3.36863
Thoc2	-0.05254	0.647648	0.854199	3.00374	3.12555	2.83644	3.13039
Zscan10	0.00809352	0.911343	0.969395	77.4112	77.7823	74.151	83.357
Trim75	2.57264	0.00052833		0.0767887	0.0429667	0.342816	0.399751
Kdm7a	-0.204221	0.518359	0.778974	0.317953	0.234797	0.221206	0.261219
Nlrp12	-0.0832075	0.93793		0.0444688	0.0580587	0.0119116	0.0812274
Heca	0.0992745	0.766312	0.913143	0.513133	0.581927	0.655479	0.526802
Tmem102	-0.0186415	0.936873	0.978644	2.25824	2.11654	2.28308	2.08187
Atxn7l1	-0.200934	0.526034	0.781893	0.992089	0.938199	0.938486	0.754252
Lrch1	0.184006	0.382897	0.678147	1.00391	1.1655	1.20735	1.26866
Alg10b	0.0508915	0.803583	0.926166	1.5547	1.44781	1.53355	1.61103
Cdkl4	0.237489	0.736764		0.169113	0.147197	0.287735	0.0961038
Garem1	-0.256509	0.477478	0.750871	0.350345	0.476158	0.326662	0.36351
Arl14epl	-1.31751	8.4975e-19	2.21647e-16	7.95189	8.11221	3.47407	3.03696
Ap5b1	-0.0148155	0.95857	0.987123	0.838992	1.00411	0.873972	0.966602
Tmem237	-0.0132881	0.935599	0.978059	4.74996	5.04778	4.96181	4.80225
Ifi211	-2.21038	0.0241778		0.207995	0.31179	0.0674076	0.0295499
Zfp408	0.0645108	0.6445	0.851545	3.49046	3.8767	3.70252	4.05473
Accsl	-0.646703	0.000588228	0.00659451	4.0491	3.6811	2.48417	2.50924
Pdp1	0.142599	0.572666	0.807963	0.77814	0.947645	1.03809	0.877901
Nom1	-0.101461	0.292451	0.593792	10.6077	10.7143	9.66081	10.4035
Nicol1	1.1484	0.232689		0.35235	0.26835	0.917601	0.6007
Drc1	-0.353559	0.692216	0.878721	0.54356	0.512136	0.17512	0.659187
Tatdn2	-0.182539	0.0400438	0.183797	16.4291	15.4534	14.0379	14.342
Spef1l	0.265176	0.685285		0.52192	0.29425	0.489313	0.546008
Zbtb2	-0.121208	0.388752	0.683152	4.61757	4.58405	4.63365	3.89077
Adgrg5	1.21502	0.0163679	0.0959512	0.220533	0.172758	0.428826	0.507565
Foxr1	0.922145	0.0381092	0.177446	0.4298	0.57194	0.857556	1.02513
Bclaf3	0.0147106	0.89062	0.961779	7.55975	8.29981	8.21755	7.92957
Atxn7l3b	0.0430335	0.691329	0.878271	8.43862	8.58797	9.65241	8.04974
Tmed8	0.177844	0.182833	0.461263	1.98485	1.99724	2.16799	2.37407
Gm1322	0.492585	0.607724		0.0698893	0.136872	0.113573	0.196598
Myrf	-0.189156	0.0117242	0.0744669	14.1727	14.238	12.684	12.4736
Iqgap3	0.0730554	0.434215	0.719538	7.7685	7.03279	7.96821	7.77099
Mfsd2b	1.02086	0.0761558	0.274622	0.229346	0.109409	0.248098	0.47935
Rnf207	0.168601	0.67308	0.867429	0.501669	0.59676	0.550456	0.691339
Pusl1	0.104655	0.448638	0.72991	10.9495	11.3659	11.5306	12.7027
Mageb4	0.747797	0.440428		0.0972908	0.0597756	0.178848	0.087811
Zfp213	-0.01772	0.923452	0.973162	3.05517	3.06886	3.47831	2.63717
Gramd2a	-0.257893	0.320065	0.622506	1.08862	0.927143	0.88768	0.820416
Kcnk6	0.408516	0.167781	0.438514	0.587573	0.530421	0.814229	0.686893
Usp36	-0.0297695	0.701492	0.883169	13.3416	13.3261	12.8418	13.5342
AW146154	0.630377	0.0198506	0.110547	0.716824	0.730834	1.17796	1.09677
AW554918	-0.00832394	0.972605	0.992292	0.693577	0.831753	0.789927	0.739024
Ccdc102a	0.506959	0.00041164	0.00484091	5.14285	5.72296	7.0716	8.47973
Layn	1.01791	0.258429		0.0694879	0.181447	0.337797	0.13821
Rfx7	-0.00090069	0.993518	0.998083	2.94362	3.04543	2.92867	3.11638
Pgap3	0.401094	0.118546	0.356707	1.39736	1.35717	1.55503	2.12807
Slc47a2	0.926766	0.00168916	0.0156611	0.715271	0.880715	1.50473	1.55402
Il20rb	0.0880693	0.785255	0.920332	1.02189	0.797614	1.10384	0.859249
Dnaaf3	0.302814	0.133653	0.383072	2.22778	2.58632	3.03165	2.92742
Lrrc8b	-0.318573	0.31095	0.613561	0.346682	0.447304	0.308452	0.333762
Zdhhc6	0.0167878	0.874993	0.956964	11.3242	10.7569	11.1706	11.3964
Acsl6	0.0671351	0.884325	0.959546	0.501734	0.34147	0.40033	0.491386
Acsl4	-0.472357	0.00130128	0.0125979	2.73197	2.75622	2.00074	1.99358
Acsl3	0.1245	0.303035	0.605373	4.79008	4.84268	5.5494	5.05233
2310061I04Rik	-0.033918	0.762575	0.912425	19.166	18.3823	18.226	18.8138
Slc2a13	0.0728664	0.950141		0.0126013	0.0383886	0.0341293	0.0214832
Zyg11b	-0.00895633	0.949707	0.983816	1.20778	1.25377	1.3003	1.16359
Prex2	0.303701	0.132738	0.381432	0.785479	0.800677	0.963496	1.00971
Crxos	-0.459952	0.401519	0.692552	1.05366	0.802474	0.658557	0.711048
Pus10	0.12672	0.282631	0.583016	6.33275	7.01481	7.75326	6.93098
Dnah1	1.15287	0.0168798	0.0980814	0.0407338	0.0671775	0.0951372	0.142544
Fbxw10	-0.334693	0.611001		0.231911	0.137629	0.168667	0.124003
Mef2a	0.215913	0.359426	0.658539	0.680153	0.70976	0.806771	0.825229
Cemip2	-0.802401	2.51569e-17	4.81816e-15	7.65259	8.05545	4.79599	4.29682
Trim80	0.617333	0.787408		0.0784782	0.0838321	0.240791	0
Vrtn	0.299464	0.249757	0.546093	1.45557	0.941318	1.50209	1.50746
Gm5820	0.503418	0.655812		0.0377402	0.10676	0.0943529	0.0965116
Pramel17	0.977341	0.189866		0.194994	0.1182	0.426561	0.195899
Ubtfl1	1.15479	0.139585		0.0624705	0.122343	0.214748	0.199692
Tmem253	-0.0693207	0.81403	0.929641	2.66815	2.07249	2.06872	2.46152
Zfp551	0.520544	0.529928		0.111865	0.107617	0.183993	0.143034
Rps27a	0.124435	0.254118	0.551751	33.1689	29.6914	34.9975	34.2689
Smagp	-0.0237285	0.803878	0.926361	36.0299	37.8706	35.4377	37.8766
Ak8	-0.301925	0.569494	0.806229	0.652545	0.483548	0.485012	0.451008
Adamts17	0.445714	0.667642		0.0182709	0.0417454	0.0342587	0.0438031
Med22	0.0927322	0.489338	0.757927	11.1431	13.6277	13.7277	12.8566
Thnsl2	0.584527	0.054262	0.223377	0.908686	1.17746	1.48605	1.64235
Calca	1.10548	8.91322e-06	0.000162603	2.43125	2.72079	6.07829	5.09823
Rabgap1	-0.354811	0.131891	0.379914	1.06329	1.30333	0.886102	0.977055
Ube3a	0.0347804	0.763024	0.912579	2.54061	2.34915	2.62402	2.43686
Ak2	-0.229073	0.00619865	0.0448175	42.3709	43.9996	37.8284	36.5494
Ncoa4	-0.0666455	0.858462	0.950267	0.466034	0.368626	0.374197	0.439302
Il17re	-0.645602	0.194009	0.477277	0.37145	0.532781	0.228893	0.354539
Limk2	-0.409368	7.1656e-07	1.64917e-05	15.6505	16.1051	12.048	12.0844
Ccdc160	0.00343961	0.985645	0.995275	4.47529	4.16018	4.58728	4.17723
Ppp2r1b	-0.106693	0.427684	0.713302	4.95501	6.41994	5.30571	5.31111
Tnfsfm13	0.370428	0.146531	0.40431	1.63065	1.46771	1.73724	2.32193
Pramel31	1.26132	0.000574209	0.00647178	0.537606	0.554588	1.07856	1.54453
Shank1	0.199181	0.618526	0.837963	0.190222	0.16557	0.233254	0.178364
Ank2	-0.0598648	0.831687	0.938373	0.517824	0.63669	0.49647	0.613894
Retreg1	-0.103887	0.778354	0.918217	0.526046	0.560893	0.504141	0.515675
Armc2	1.48155	0.0806026		0.0424529	0.0295609	0.145051	0.0723754
Tdpoz8	0.798754	0.258869		0.189921	0.178532	0.313377	0.33026
Erich1	0.70163	0.107945	0.337564	3.53499	2.1766	5.64086	3.80569
Tlcd5	0.553368	0.0681548	0.259035	0.592433	0.558342	0.843552	0.862851
Pnldc1	0.28348	0.0166907	0.097364	11.3118	11.141	13.1844	14.4006
Pm20d2	-0.1785	0.631816	0.845756	0.308058	0.312109	0.286501	0.267847
Shisa6	-1.40628	0.0321094		0.0934928	0.124458	0.045831	0.0351596
Bpifb4	-0.173271	0.823397		0.228865	0.170747	0.0899135	0.267551
Ccdc24	-0.337954	0.583201		0.507063	0.507082	0.391096	0.455222
Dnai2	-0.701087	0.182125	0.460151	0.360596	0.37036	0.282474	0.172133
Kbtbd6	0.696644	0.0572323	0.231601	0.543151	0.372599	0.794034	0.718032
Pnpla1	0.098914	0.931572		0.0245355	0.0440463	0.049839	0.0352933
Zfp936	-0.0566725	0.605721	0.831178	9.2284	8.39771	8.29428	8.8399
Foxr2	-0.56715	0.148545	0.407611	0.509607	0.648571	0.460371	0.334013
Tmem92	1.28678	8.6963e-05	0.00126152	0.74084	0.56276	1.58274	1.66201
Zfp345	-0.314247	0.137947	0.38992	2.52407	2.18149	2.10768	1.72083
Mansc4	-0.762838	0.520119		0.17171	0.208172	0.153316	0.0784121
Trim43a	0.328372	0.570083	0.806566	0.319051	0.298833	0.320794	0.46116
Defb42	-0.771097	0.320743		0.74303	0.852514	0.478478	0.489425
Sorbs1	0.1329	0.448714	0.729981	1.56764	1.38945	1.60094	1.67425
Golm1	-0.221553	0.0272685	0.139053	11.8169	11.4184	9.4093	10.7126
Setd6	0.653604	3.57368e-09	1.35562e-07	13.267	12.6816	19.3877	21.8345
Xpo1	0.0314093	0.630804	0.845187	40.7883	43.6486	44.8619	42.2185
St3gal5	0.065332	0.799046	0.924831	1.42529	1.80472	1.62039	1.75958
Zfp748	0.326406	0.0799903	0.282478	1.43698	1.5848	2.14957	1.67379
Trpm3	0.664385	0.075684	0.273644	0.0991061	0.111947	0.148941	0.180825
Zcchc18	0.476507	0.198019	0.483238	0.376489	0.304677	0.388944	0.576872
AU040320	-0.0452241	0.856016	0.949326	1.02347	1.02901	0.961864	1.05073
Pakap	-0.414725	0.000261466	0.00328638	3.58279	3.68865	2.79316	2.71062
Ap2b1	-0.116565	0.112126	0.345125	16.8036	17.3443	15.6384	16.1492
Nrbf2	0.176168	0.34513	0.645701	3.90681	3.68499	4.71059	3.98252
Atp2b2	-0.614973	0.32458		0.0864446	0.0745698	0.0598181	0.0434228
B3gnt8	0.687878	0.418488		0.15847	0.170387	0.279659	0.2503
Nacc2	-0.159613	0.536967	0.788752	0.617401	0.533054	0.592521	0.445645
Cacnb4	1.07859	0.258808		0.034315	0.00896036	0.0600528	0.035101
Ccne2	0.550089	0.000160753	0.00217418	3.09732	3.18311	4.58526	4.70713
Agap1	-0.0883793	0.498329	0.765665	1.73245	1.79923	1.60051	1.74901
Tomm40l	-0.0868981	0.519435	0.779394	5.60185	6.8336	5.67626	6.10156
Nfatc2	-0.451795	0.400896	0.692203	0.239782	0.28653	0.20829	0.181877
Samd4	-0.48949	0.232069	0.525397	0.223874	0.216698	0.161637	0.152997
Piezo1	0.604753	1.32767e-13	1.09525e-11	12.313	12.1655	17.4306	20.1426
Cstf3	0.193441	0.452564	0.732598	4.2873	4.39475	5.60287	4.46252
Slc41a3	-0.0618208	0.906343	0.967488	0.371774	0.372132	0.39502	0.308985
Zfp1	0.490802	5.36514e-06	0.000102972	11.5801	11.3176	15.8633	16.6586
Zfp27	-0.247623	0.298517	0.600584	1.2264	1.48936	1.26049	1.03047
Rusc2	-0.409026	0.0409216	0.186359	1.39275	1.38495	0.940198	1.17063
Cgn	-0.37016	0.00361617	0.029267	3.79826	3.79833	2.87629	3.05471
Kcnh6	-0.0175314	0.941626	0.980729	0.926966	0.902628	0.961093	0.876052
Xaf1	-1.52361	4.27288e-15	4.69982e-13	4.57958	4.31326	1.3567	1.7736
Slc38a6	0.0416576	0.850947	0.947385	2.0235	1.60705	1.7135	2.07462
Adam15	-0.408542	0.00486107	0.037054	4.51558	4.84492	3.54082	3.56891
Adcy7	0.610432	0.0708539	0.265138	0.310656	0.23262	0.42545	0.42058
Fam117b	-0.0180533	0.906624	0.967575	1.86421	2.10659	2.02003	1.92977
Creb1	0.117503	0.375056	0.671393	1.7024	1.73862	1.92023	1.84725
Arhgef10	0.0210793	0.907007	0.967696	1.33784	1.40734	1.36336	1.44995
Arnt	-0.0436712	0.662911	0.862083	7.19539	7.72561	7.54273	7.0616
Strip2	-0.38372	0.687857		0.0312709	0.0816547	0.0325747	0.0533119
Gpx4	-0.0709562	0.386219	0.680767	71.0139	69.2938	64.6336	70.2184
Tyw5	0.121155	0.480489	0.752406	6.23552	7.32445	6.65839	8.18537
Timm8a2	-0.726047	0.0913383	0.30599	1.5955	2.29926	1.50523	0.866062
Zfp791	0.890405	0.0255501	0.132532	0.439466	0.329612	0.882461	0.561915
Prps1l3	0.135545	0.143045	0.398345	10.4846	11.5281	12.802	11.5791
Card9	0.140163	0.870497		0.147762	0.144689	0.193942	0.160593
Baiap2	-0.0894324	0.520161	0.77963	4.66217	4.4082	4.27677	4.34587
Brms1l	-0.109087	0.466775	0.742438	4.49741	5.26223	4.62231	4.49475
Washc1	0.356675	0.000541099	0.00616457	8.95067	9.03238	11.2363	12.012
Btrc	-0.084514	0.482361	0.753788	3.01722	3.26383	3.04882	2.92123
Sgk3	0.556866	0.0378578	0.17655	0.45138	0.635937	0.860705	0.746707
Capzb	-0.219275	0.000783625	0.00836396	102.321	102.651	91.9641	85.7999
Zdhhc12	-0.147613	0.217716	0.509944	19.2331	17.6839	16.6019	17.1195
Rai1	-0.422619	0.00116418	0.0115315	2.61223	2.65851	1.89035	2.08139
Cd6	0.216917	0.844728		0.0944697	0.024668	0.0767586	0.0724751
Cdh3	-0.048021	0.635825	0.848137	7.49927	7.48363	7.55747	7.07599
Spn	-0.194194	0.624554	0.84192	0.984757	1.05525	0.917427	0.879023
Cklf	0.492769	0.126669	0.371196	0.933258	0.988204	1.3595	1.39061
Cnot2	0.0209042	0.80762	0.927468	18.515	19.1505	20.1977	18.3726
Tcf25	0.633086	3.81774e-22	1.47268e-19	41.6236	41.3024	63.8976	65.9301
Ccdc107	0.00144289	0.994732	0.998669	6.63497	6.3304	5.86955	7.222
Ripply1	1.00975	9.21316e-06	0.000167661	4.40097	4.78827	9.57642	9.09212
Ccdc17	0.242049	0.795692		0.124155	0.0990598	0.181065	0.105833
Lipt1	0.250812	0.245191	0.540142	3.22477	3.28279	4.24138	3.52571
Lekr1	0.753117	0.11517	0.350436	0.340296	0.298623	0.641559	0.427981
Tcstv4	1.10528	0.120597		0.307487	0.0868015	0.425922	0.446293
Zfp987	-0.347098	0.00966241	0.0641849	6.61604	5.97182	4.80815	5.21585
Wdr93	0.450908	0.383313	0.67845	0.290591	0.331973	0.461628	0.394781
Deptor	-0.330637	0.0578761	0.233242	1.15964	1.09858	0.982109	0.82841
Dhrs4	0.168628	0.227701	0.52112	8.89016	8.87368	10.0215	10.1239
Dnajb6	0.185198	0.108217	0.337776	8.99741	8.16782	9.35877	10.3663
Dusp22	0.65828	0.0315225	0.154748	0.629622	0.616528	1.0063	0.960315
Dyrk1b	-0.0169832	0.932294	0.976692	2.79051	2.35282	2.4165	2.73712
Fer	-0.24547	0.10283	0.32828	3.86665	3.97905	3.42928	3.25023
Dbi	0.0841503	0.376023	0.671965	60.9928	61.4856	68.5047	62.6347
Kat2a	0.033644	0.624989	0.842112	38.349	37.2911	38.9393	39.239
Gnpda2	0.265294	0.290001	0.591272	1.69086	2.00426	2.32684	2.14302
Grk6	-0.242136	0.00151063	0.0142371	26.2432	27.1513	23.3409	22.2115
Anapc11	0.215212	0.0278348	0.141114	13.2983	14.8669	15.3298	17.6211
Banf1	0.0886339	0.199315	0.485014	222.514	218.409	227.718	245.553
Ctsa	0.0115641	0.875478	0.957037	22.9509	23.0592	23.2087	23.6156
Adar	-0.409269	1.37117e-05	0.000239196	9.88975	10.7217	7.30248	8.34902
Usp14	0.013131	0.860459	0.95111	25.1836	24.9573	26.8903	24.2087
Glrx2	0.548546	0.000136018	0.00187137	2.93535	2.84195	4.09339	4.45026
Marveld2	-0.57991	0.0701181	0.26379	0.885098	0.862291	0.578473	0.597453
Kcnh1	-0.748551	0.197238	0.482102	0.0921188	0.160361	0.0815657	0.0687085
Txnl4a	0.0446063	0.495363	0.762834	83.2703	84.2115	86.7317	87.6434
Mapt	-0.926207	4.59503e-05	0.000712216	1.15504	1.23111	0.699559	0.561995
Olfm1	0.107841	0.855241	0.949255	0.565862	0.584161	0.608646	0.689876
Rabgap1l	-0.542096	0.0277738	0.140917	0.743371	0.75833	0.468683	0.579166
Ric3	0.249736	0.182743	0.46116	1.24112	1.14041	1.42107	1.44691
Sertad2	-0.526839	0.000108309	0.00152906	3.11044	3.01572	2.09792	2.1936
Smurf1	-0.0588218	0.597512	0.825506	4.31783	4.65345	4.32956	4.34941
Stk35	0.00148095	0.9885	0.996296	5.47936	6.19257	5.90061	5.87118
Gng2	-0.644358	6.97341e-05	0.00103629	3.24597	3.14555	2.13851	1.98207
Slx4ip	-0.088849	0.655887	0.858426	1.31037	1.20975	1.27476	1.12516
Ets1	0.145711	0.719743	0.893381	0.243075	0.306158	0.311001	0.288864
Slco3a1	0.485231	0.577126		0.101251	0.0818342	0.096432	0.147957
Zfp953	-0.0874618	0.778891	0.918416	0.52364	0.513716	0.495548	0.480406
Slc16a3	0.114717	0.481237	0.752805	3.75383	4.69107	4.85182	4.34601
Gng7	0.166	0.614255	0.835764	0.713888	0.534099	0.626674	0.794854
Mapk1	-0.168578	0.0853485	0.293733	22.1094	23.8642	22.1617	19.1202
Gngt2	0.532973	0.0766296	0.275641	3.62257	3.65039	5.50085	5.1604
Kdm3a	0.0336085	0.726722	0.89643	14.3778	15.0613	16.9123	13.5195
Rnpc3	0.0604729	0.689483	0.877009	2.7382	2.98765	3.15716	2.85799
Fthl17f	-0.278301	0.597334	0.825471	1.10825	1.25074	0.986182	1.00874
Elavl4	-0.0300428	0.961999		0.137157	0.138781	0.154306	0.118377
Fnbp1	-0.373825	0.000193536	0.00255203	7.54601	7.99119	6.20366	5.89871
Gabrb3	-0.586829	0.213371	0.505019	0.216746	0.224436	0.152598	0.146533
Gpr146	0.758667	0.343006		0.0629003	0.0605116	0.136563	0.0804263
Cdc42se1	-0.181464	0.0215189	0.117099	24.7728	26.2262	23.0662	22.3129
Tmod2	0.387953	0.235356	0.529918	0.169611	0.259252	0.322338	0.241554
P2rx7	0.372421	0.253776	0.551366	0.837762	0.712725	1.15533	0.870773
Rcsd1	-0.374657	0.501283	0.767713	0.309219	0.348033	0.31989	0.184055
Rnf38	0.051103	0.656735	0.858798	4.10674	4.41131	4.52225	4.37346
Svbp	0.00907301	0.952297	0.98473	13.6092	13.8421	13.5107	14.3691
Atp8a1	-1.07629	0.00132713	0.0128062	0.313443	0.492839	0.195907	0.19177
Kif5a	0.0144901	0.933278	0.977253	1.39088	1.26289	1.30466	1.4071
Kctd21	-0.108246	0.738062	0.901893	0.738957	0.765799	0.669697	0.744072
Klk13	1.05877	0.182514		0.280934	0.209594	0.668909	0.359211
Pigc	0.305668	0.306001	0.608182	0.78499	0.648731	0.976043	0.82219
Trim63	0.395035	0.242282	0.536775	1.04579	0.868883	1.11529	1.44939
Klhl15	0.0520995	0.875206	0.956969	0.63503	0.800509	0.886875	0.610377
Ldb3	0.0977953	0.813597	0.929612	0.274869	0.247879	0.251497	0.3116
Plpbp	0.612933	0.00296966	0.0248371	3.1424	3.50597	5.65408	4.59022
Prkcz	-0.129524	0.42924	0.71518	2.3546	2.29579	2.14364	2.14986
Rbms2	0.0480378	0.623232	0.840997	6.50657	6.72271	6.59285	7.20371
Mier1	0.109308	0.322395	0.625247	4.95535	4.76636	5.3179	5.28069
Mrpl1	0.0653764	0.634052	0.846867	8.56799	9.84084	10.0224	9.39185
Rapgef1	-0.240736	0.00132856	0.0128122	13.2372	13.1653	11.2568	11.3053
Seh1l	-0.146958	0.0636802	0.248373	19.083	18.9473	17.8204	16.8527
Sel1l	-0.348343	0.00841493	0.0575681	2.68041	2.73234	2.09174	2.20384
Skil	0.00685857	0.952287	0.98473	3.44442	3.32233	3.66152	3.20808
Tom1l2	-0.199389	0.318457	0.620864	1.33391	1.27254	1.1035	1.19284
Rasa4	-0.497006	0.00207879	0.0185552	5.42518	4.62679	3.24773	3.95843
Trpm1	-0.990368	0.0427754	0.19196	0.23959	0.218019	0.111932	0.123776
Ddhd1	-0.27274	0.157043	0.421469	1.3737	1.51069	1.26816	1.13941
Acsbg2	-0.510864	0.470597		0.222275	0.193469	0.0992326	0.189472
Zkscan4	0.555609	0.383766	0.678745	0.117486	0.30678	0.293722	0.314749
Asb1	0.0648334	0.761425	0.911995	0.836899	0.849513	0.936937	0.846661
Hnrnpa1	0.072957	0.393943	0.68792	70.9982	61.0277	74.1887	66.1605
Scoc	0.895277	3.82243e-05	0.000604787	2.08486	1.97077	4.18478	3.45881
Camk2g	0.0847115	0.50808	0.772686	4.46682	5.24331	5.31129	5.04372
Morf4l1	-0.407363	0.0493312	0.210349	3.52562	3.15664	2.76099	2.36089
Cd44	0.0916241	0.731471	0.898333	0.645187	0.661092	0.796296	0.605664
Tctn1	0.181027	0.132952	0.381846	4.33624	4.50441	4.92153	5.18549
Ube2j2	0.016043	0.866191	0.9532	11.452	10.6366	11.3222	11.2537
Gvin1	-2.08327	0.0924963		0.0217138	0.0445494	0.0116327	0.00396628
Clip2	0.0962261	0.656077	0.858488	1.07167	0.954816	1.1392	1.05018
Eif4e2	-0.191082	0.0122003	0.0770622	36.5559	38.804	34.2283	32.3709
Elovl1	-0.112591	0.457312	0.735631	8.16775	7.04992	7.10118	7.13296
Bicd2	0.200332	0.218995	0.511106	1.36842	1.53541	1.59166	1.76629
Npr3	-0.0142499	0.973398	0.992606	0.164635	0.212358	0.153729	0.225724
Cep350	0.0575825	0.740473	0.90242	0.612903	0.615337	0.60465	0.68456
Ceacam1	0.539631	0.000926482	0.00957528	2.11298	1.98973	3.07384	2.95118
Rreb1	-0.357241	0.0804641	0.283331	0.830545	0.942506	0.741248	0.654601
Fars2	0.0379608	0.79997	0.925314	9.37461	8.71603	9.10988	9.66756
Gmfg	-0.952511	0.0503381	0.212691	0.587923	0.534991	0.274668	0.318919
Aifm2	0.13583	0.485073	0.7553	1.9302	1.8644	2.07982	2.13857
Zfhx2	0.250415	0.0429187	0.192383	2.23344	2.24402	2.46133	2.91612
Emc1	0.0194291	0.8539	0.948877	4.6356	4.28882	4.65617	4.48852
Hdhd2	0.176558	0.17827	0.45507	6.01567	6.84696	7.25353	7.39004
Zfp982	-0.151664	0.186204	0.466328	6.7979	6.47911	5.66506	6.41295
Mex3c	0.0344539	0.813701	0.929612	3.32714	4.12432	4.15483	3.52723
AI429214	0.931841	0.10196	0.326916	0.224332	0.274583	0.525791	0.43922
Gm14137	-0.219794	0.780969		0.0762541	0.222541	0.09532	0.16059
Zfp951	-0.339647	0.0415239	0.188101	3.54644	3.39387	2.66937	2.86363
Zfp808	0.225419	0.060549	0.240545	6.96644	6.60699	7.42326	8.62544
Tmem267	1.34023	0.0132458	0.0819436	0.311643	0.223785	0.584345	0.78699
Nolc1	0.0188772	0.776899	0.917645	113.672	103.948	109.322	113.329
Tsc2	-0.0478135	0.555814	0.79934	13.0508	12.739	11.9971	13.1864
Mobp	0.83507	0.0184994	0.104964	0.853004	0.922084	1.59369	1.55979
Polr2k	0.0900994	0.789385	0.92128	3.25114	2.97418	3.70462	3.0824
Mtcp1	0.453354	0.289804	0.590913	0.614862	0.648812	0.83177	0.904648
Pde4dip	-0.0428463	0.8643	0.952655	0.423972	0.482462	0.439243	0.447183
Vgf	-0.343459	0.221953	0.514372	1.19424	1.38362	1.0154	1.02488
Nsmf	0.197047	0.611518	0.834367	0.456292	0.546604	0.499817	0.655606
Wdr37	-0.105458	0.517163	0.778248	2.03992	2.2834	1.96351	2.08816
Pkig	0.0753743	0.594301	0.823396	10.7203	11.7032	11.7502	12.05
Tmsb10	-0.381779	0.0614949	0.243104	79.8707	102.121	65.0358	75.7975
Rab43	0.0218941	0.932469	0.976838	0.786965	0.71222	0.823503	0.724187
Trim46	0.258097	0.421844	0.708761	0.678024	0.845594	0.853877	0.970458
Kif21b	0.279271	0.143703	0.399498	0.801896	0.790641	0.832498	1.12188
Tcerg1	-0.00894007	0.905186	0.967123	25.1042	22.9695	24.2316	24.0383
Lrif1	0.190718	0.315693	0.618028	3.78892	4.02701	4.32815	4.65787
Klhl20	-0.0619116	0.703698	0.884104	2.45069	2.33186	2.42434	2.21395
Tmco1	-0.0471054	0.677789	0.869444	7.16785	7.34155	7.9005	6.28673
Kcnj10	-0.280418	0.627417	0.843632	0.124357	0.168988	0.158623	0.084371
Piezo2	-0.170729	0.858482		0.0218512	0.0268508	0.019281	0.0230091
Plekhm3	0.278556	0.165477	0.435233	0.599671	0.638489	0.765643	0.746257
Catsperz	1.24508	6.96209e-07	1.60638e-05	3.72038	2.70624	7.61813	7.83772
Lipe	-0.0270719	0.874278	0.956783	3.04607	2.96336	2.96703	2.99698
Pnkd	-0.424408	0.00108678	0.0108869	6.2879	6.05071	4.58795	4.70483
Ivns1abp	-0.0115488	0.927624	0.974918	5.89288	6.22706	6.30692	5.81491
Dhps	0.723909	9.29851e-19	2.40252e-16	37.6491	36.7136	60.0901	63.9202
Arl4a	0.31991	0.00986756	0.0652942	4.1148	4.3289	5.41777	5.21853
Gtf2a2	0.0340409	0.742883	0.903524	30.76	31.0477	33.0076	30.8801
Dnm2	-0.174121	0.0265917	0.136758	19.8807	19.3629	17.774	17.3635
Rrn3	0.0374456	0.576633	0.81072	41.4013	40.1787	43.5418	41.0245
Leo1	0.0740101	0.383127	0.678243	23.71	23.3608	25.9709	24.0696
Parp14	-0.917293	1.44482e-07	3.8986e-06	1.5377	1.51253	0.869838	0.761248
Zfp784	0.576986	0.155216	0.418451	0.467318	0.668639	0.696194	0.974052
Pdxdc1	-0.0762256	0.386193	0.680767	13.0816	13.2388	13.0599	12.1442
Pstk	0.161879	0.180494	0.458102	15.8896	15.3955	17.9665	17.3765
Pigl	0.0556933	0.593123	0.823004	7.19858	8.03838	8.02967	7.93223
Lif	0.970488	3.94757e-07	9.76659e-06	1.21306	1.48315	2.99503	2.3223
Mlf1	0.665914	0.0496743	0.211025	1.27473	1.38432	2.11468	2.14782
Myo6	-0.383836	0.10268	0.328071	0.596947	0.630815	0.452974	0.492435
Cnnm3	0.228937	0.0690328	0.261214	2.85672	2.99736	3.46711	3.45346
Ermard	0.0598792	0.766583	0.913152	2.87238	2.20806	2.83219	2.55374
Angptl7	-2.47963	0.0588286		0.106762	0.174237	0.0333641	0.0170637
Rad54b	0.0972213	0.443868	0.726639	5.59242	5.47304	5.85309	6.10759
Mroh8	-0.152855	0.718104	0.892289	0.343306	0.432586	0.374253	0.331773
Ankrd37	0.763359	0.0402885	0.184519	1.6204	1.21747	2.61793	2.26736
Defb30	0.11169	0.896968		0.220057	0.359133	0.326655	0.281371
Evi5l	0.331417	0.512986	0.775296	0.215867	0.330853	0.346101	0.330018
Abca3	-0.278606	0.0800113	0.2825	1.89587	2.01168	1.4553	1.79402
Glyctk	0.22564	0.318603	0.621061	0.984006	1.08741	1.25103	1.18947
Edem3	-0.046876	0.775521	0.917256	1.35831	1.45518	1.40366	1.33988
Asphd1	0.295025	0.707639		0.693317	0.569939	0.513581	1.01783
Tcstv2c	1.14931	3.3461e-11	1.79341e-09	5.4772	4.3561	9.83606	12.2805
Tesmin	-0.26504	0.5266	0.782317	0.67852	0.579848	0.516614	0.528433
Iffo1	0.258373	0.128354	0.374332	2.68096	2.74125	3.17711	3.36038
Slc39a2	0.539076	0.621812		0.0706818	0.0615217	0.0662659	0.135564
Slc30a2	-0.197043	0.0820816	0.286705	7.15712	7.2034	6.15989	6.47068
Mks1	-0.06865	0.561965	0.803168	7.89327	8.20395	7.87549	7.60303
Arhgap12	-0.103608	0.38755	0.68201	4.07729	4.28367	4.15949	3.69133
Pkd1l3	0.452277	0.0366766	0.172328	0.616993	0.658381	0.964076	0.801549
Coq10b	-0.381354	0.0323229	0.1578	5.30695	5.24845	3.77375	4.40863
Tmem120b	-0.341184	0.149228	0.40851	2.95638	2.42454	2.02421	2.27947
Fdx2	0.0220307	0.827065	0.935735	37.0231	36.9245	37.3455	38.441
Strn4	-0.213967	0.00697711	0.049582	18.9751	19.8652	16.8661	16.9207
Map2	-0.654613	0.0189862	0.106995	0.635404	0.692949	0.439188	0.414189
Asxl1	0.131063	0.0568803	0.230654	16.0124	16.4257	17.6425	18.2097
Zfp606	0.639528	0.315726		0.165779	0.208711	0.36265	0.249822
Ahnak	0.350504	0.572052		0.354288	0.651011	0.623301	0.687895
Zfp869	1.23816	1.09707e-25	6.98759e-23	3.88507	4.41787	9.98303	9.75833
Rnf213	-0.700039	3.50067e-12	2.32146e-10	2.26798	2.2946	1.39338	1.44207
Sco1	0.00254515	0.98328	0.99484	4.29151	4.47989	4.60618	4.2519
Nynrin	0.145018	0.193416	0.476791	2.91175	2.91407	3.21607	3.28965
Sytl2	0.579984	0.558785		0.0436697	0.0342092	0.0764239	0.0446699
Aak1	-0.315054	0.3544	0.65375	0.271803	0.271765	0.212889	0.224358
Arap1	0.185655	0.118748	0.356995	3.31874	3.13245	3.62554	3.79009
Tmem141	-0.240225	0.509098	0.773319	3.0181	2.41437	1.76642	2.89985
Eif4g2	-0.0640087	0.350445	0.650315	59.9163	66.1368	64.0255	57.6864
Pdzd9	-0.0949535	0.847451	0.94593	0.656212	0.522953	0.522	0.621117
Ddx17	0.158894	0.0137919	0.0844254	33.9502	35.9563	39.3253	39.4279
Nadk2	-0.0482283	0.676078	0.868745	5.89489	6.2628	6.20235	5.64945
Selenot	0.130169	0.108055	0.337621	15.0866	15.3747	16.8087	16.8537
Filip1l	-0.318422	0.436523	0.721209	0.445588	0.345421	0.274148	0.364991
Setd1b	-0.25327	0.0123869	0.0779073	4.72693	4.38304	3.65155	4.07231
Larp1b	-0.143608	0.464878	0.741144	1.99812	1.85201	1.94002	1.57484
Tet2	0.125305	0.293818	0.595331	2.02364	1.99376	2.17625	2.24516
Flot2	0.168066	0.118945	0.357277	10.6943	10.5646	13.0002	11.1396
Tacc3	0.0421735	0.573783	0.808748	36.6303	35.1186	36.2744	38.3366
Shroom4	-0.607262	0.0883351	0.300015	0.265388	0.262035	0.165872	0.182392
Peg10	0.105722	0.125569	0.369317	15.3095	15.7986	16.9041	16.8803
C1qtnf5	-1.69815	0.151367		0.207762	0.228425	0.0273378	0.111853
Cdkn2a	0.379659	0.0482658	0.20726	6.45856	7.01281	8.56025	9.10883
Clmn	0.0721033	0.763929	0.912579	0.325051	0.341322	0.33547	0.369768
Med15	-0.0119169	0.904891	0.966959	11.0779	10.4442	11.3661	10.191
Hsd3b7	0.487802	0.0351233	0.16721	2.14011	2.01178	3.11297	2.79612
Zfp692	0.25092	0.0606357	0.240677	10.0591	9.84511	10.5334	13.3673
Rap1gds1	-0.204399	0.136435	0.387702	4.01582	4.00451	3.62314	3.40878
Ung	-0.293964	0.000260176	0.00327349	58.1543	66.3845	53.4614	49.0011
Uevld	0.102256	0.625477	0.842583	1.07178	1.22003	1.20542	1.26353
Mtmr7	0.453853	7.38481e-06	0.000137122	7.81959	7.43253	10.3594	10.7549
BC051019	0.130776	0.820282	0.932736	0.404136	0.277706	0.416555	0.317297
Pex10	-0.110024	0.516641	0.778052	5.21217	5.47243	4.96758	5.01705
P3h1	-0.315104	0.00859726	0.0585871	7.33924	7.8492	6.19752	6.10845
Cabyr	-1.29925	0.167966		0.184621	0.284867	0.0944107	0.107301
Kntc1	-0.0146622	0.874901	0.956964	5.72157	6.33803	6.09809	5.93501
Zhx1	-0.113954	0.661754	0.861986	0.66409	0.72653	0.708731	0.583984
Snca	-0.856123	0.42585		0.193131	0.196118	0.0938853	0.109752
Golga7	0.532735	4.3152e-08	1.28601e-06	22.0154	22.9275	35.7873	29.8447
Tmem183a	0.00251228	0.975918	0.993437	18.7305	19.4855	20.2528	18.4051
Dlgap4	-0.193186	0.0417776	0.188875	11.7996	11.2401	9.87282	10.4925
Hvcn1	0.138842	0.26308	0.562821	6.49113	6.18226	6.76383	7.34744
Anapc5	0.038671	0.556618	0.799795	76.4397	75.5984	76.3694	81.2625
Rabl3	-0.268075	0.188081	0.469278	4.90698	4.11978	4.60893	3.00639
Fam133b	0.0447815	0.759852	0.911418	6.6255	6.1866	7.51079	5.85963
Pitx2	0.474504	0.236064	0.530683	0.58123	0.449119	0.733969	0.712844
Trim71	-0.181081	0.243596	0.537919	2.61501	3.08621	2.23101	2.82975
Txnrd1	-0.00418988	0.944246	0.981704	72.062	73.7701	74.5019	72.2821
Blm	0.0188197	0.839801	0.942334	8.89469	8.71265	8.70155	9.31461
Cacna1b	-0.552884	0.0726942	0.269181	0.269421	0.351758	0.223936	0.202005
Capg	0.34158	0.00648663	0.0465189	13.1492	11.3505	16.0293	15.4108
Akap1	-0.0483748	0.565975	0.804067	18.3624	20.3982	19.8366	17.9777
Rpf2	-0.0135514	0.881597	0.958956	34.2053	30.3895	33.9044	30.8032
Map2k7	0.761744	2.13235e-07	5.57792e-06	6.04953	5.21288	9.46776	9.88033
Apaf1	0.18671	0.196233	0.480376	1.80646	2.18026	2.22925	2.34471
Wsb1	0.213464	0.0336939	0.162482	15.1498	14.6547	18.7764	16.13
Cd63	-0.345276	0.000326243	0.00400141	41.8888	44.5645	33.6733	34.9528
Arrdc3	0.0146018	0.877806	0.95791	10.9698	10.9216	12.0069	10.3221
Arrdc4	0.0458556	0.658525	0.859947	6.94948	7.10042	7.55991	7.08433
Hbs1l	0.0525244	0.513523	0.775494	23.674	22.8513	23.8321	24.8848
Cd74	0.447665	0.361871	0.659972	0.566461	0.561057	0.879014	0.674344
Ryk	-0.0200714	0.837616	0.941207	11.7111	10.7439	11.5136	10.8736
Selenop	0.0518565	0.821178	0.932915	2.19888	2.34484	2.64624	2.11303
Cadps	1.30268	0.276978		0.0303201	0.00659768	0.0694854	0.0290762
Dhx15	-0.192012	0.0209887	0.114945	26.3486	27.9152	25.571	22.3743
Phc1	-0.0925061	0.125184	0.368439	93.3112	93.1119	86.4398	90.0357
Clk1	0.235086	0.0149273	0.0894202	18.8619	17.4986	21.9734	21.2983
Nusap1	0.115744	0.164465	0.433892	22.0292	20.7054	24.3605	22.4377
Oip5	-0.0530731	0.702433	0.883583	9.04709	9.01497	9.30626	8.28542
Tbc1d17	0.216464	0.0532511	0.220623	11.0463	11.2187	11.8631	14.2328
Fzd5	-0.118691	0.236477	0.531089	4.55329	4.73952	4.41936	4.21636
Smad7	-0.941176	1.25092e-17	2.61527e-15	7.76668	8.78388	4.49487	4.18656
Mterf1b	0.274401	0.470686	0.745183	1.14604	0.945016	1.38232	1.18257
Gpcpd1	-0.289975	0.214372	0.506096	1.51319	1.76851	1.59154	1.11304
Fancc	0.0769066	0.697844	0.881036	1.86313	1.89258	2.10043	1.89801
Rbpms	0.559147	5.51167e-14	4.99846e-12	30.6864	30.927	47.8127	43.8359
Syne3	-1.79255	0.00518586	0.0391161	0.148964	0.224156	0.0410293	0.0710228
Ilf3	0.0120196	0.864778	0.952699	36.0753	37.819	36.4521	38.7215
Prss57	0.0215861	0.963622	0.989157	0.357356	0.373253	0.395655	0.352486
Ankdd1b	0.124007	0.810412	0.928461	0.33252	0.200789	0.358507	0.228529
Drc7	-0.304888	0.711343		0.102403	0.171897	0.0670514	0.149641
Calcr	0.420691	0.525847		0.119099	0.134763	0.13399	0.197969
Pcdh8	0.288065	0.689646		0.107272	0.120736	0.180332	0.0851343
Rarg	-0.0597719	0.410576	0.700164	50.2193	49.0444	50.7392	45.4433
Mast2	-0.21937	0.0145969	0.0879991	9.98067	9.74715	8.10363	9.00673
Neo1	0.184041	0.0880703	0.299388	3.13073	3.3517	3.72974	3.69216
Slc22a18	-1.27351	0.00470562	0.0361102	1.10059	1.07181	0.46235	0.461393
Proc	0.108333	0.797441	0.924379	0.783307	0.792871	0.770125	0.922786
Sema3b	-0.283733	0.542586	0.792188	0.25775	0.374978	0.271564	0.244821
Eml1	0.02704	0.946786	0.982812	0.33485	0.320311	0.314966	0.351846
Map6	-0.664537	0.00123548	0.0120847	2.91312	3.13491	2.03041	1.82102
Rad17	0.127014	0.24988	0.546122	8.89623	8.61349	10.1373	9.17527
Ubtf	-0.000790071	0.990779	0.997023	61.572	55.8775	58.9699	59.5898
Timp1	0.204231	0.132544	0.381193	20.0243	16.827	22.8932	20.0774
Zfx	-0.0195327	0.883347	0.959479	2.05949	2.19208	2.12329	2.10666
Clpx	0.0902375	0.461404	0.738612	6.39324	6.63207	7.42222	6.58182
Zfp2	0.388867	0.0806074	0.283654	1.338	1.28993	1.71685	1.77312
Zscan21	-0.00421624	0.972514	0.992292	7.96911	8.08436	8.24756	7.91734
Zfp41	-0.149945	0.293587	0.595078	3.72523	3.67185	3.40388	3.33771
Slc7a2	0.819341	0.130211	0.37756	0.0640594	0.0882827	0.162377	0.109211
Cacnb3	0.190523	0.0499978	0.211841	14.5502	14.8454	15.939	17.8969
Gcdh	0.446698	3.69044e-06	7.26626e-05	13.7839	13.6779	18.5895	19.1813
Zfp68	-0.0858065	0.644894	0.851978	1.51404	1.79492	1.48889	1.65555
Rbak	0.428411	0.0128189	0.0799554	2.02046	2.25046	2.99824	2.79134
Mapk1ip1	0.209399	0.128687	0.374941	8.6694	8.3036	9.60786	10.2083
Mef2b	1.1292	7.66219e-06	0.000141505	2.26804	1.63	4.33071	4.37658
Zfp180	0.0664315	0.585185	0.817332	4.51707	4.64485	4.99867	4.68321
Mfge8	-0.0605303	0.485832	0.755548	26.0287	25.8894	24.2571	25.9932
Raph1	-0.221542	0.0737707	0.270794	2.12418	2.22064	1.80033	1.95902
Akna	-0.408333	0.0455906	0.200198	1.17871	1.18783	0.90165	0.893357
Synj1	-0.0243273	0.892883	0.962558	1.04753	1.07001	1.05149	1.04791
Proca1	-0.219045	0.772741		0.509547	0.154437	0.216108	0.34903
Fam83b	-0.430257	0.406924	0.697162	0.142107	0.149536	0.106053	0.113903
Clint1	0.0340971	0.713258	0.889676	11.0015	11.2906	11.8702	11.1767
Prss38	-0.522632	0.467021		0.578765	0.305161	0.333911	0.284626
Bahd1	-0.22488	0.248539	0.54456	1.48325	1.57191	1.3033	1.32915
Cep126	-0.190903	0.473863	0.74759	0.908841	0.907668	0.846402	0.763912
Cyb5d1	-0.227268	0.0896603	0.303035	4.79393	5.04304	4.31336	4.15961
Hsf5	0.464958	0.542226		0.0991249	0.060395	0.140431	0.0887209
Fkbp15	-0.145595	0.274627	0.575704	3.69539	3.88442	3.26304	3.64733
Morc3	0.00396367	0.964573	0.989158	11.5137	12.9408	12.5836	12.1424
Ccnjl	-0.61256	0.103537	0.329574	0.888429	0.682706	0.640955	0.421933
Spata22	-0.801326	0.165445	0.435191	0.694842	0.666217	0.352859	0.444223
Zzef1	0.207499	0.174935	0.450148	1.05317	1.1281	1.13108	1.41142
Xlr5a	-0.373953	0.690961		0.217522	0.131076	0.156871	0.106973
Zfp868	0.627704	7.24737e-07	1.66101e-05	6.2492	7.3152	11.3593	9.7509
Tulp2	0.0658041	0.840711	0.942857	0.934928	0.927691	1.02845	0.940403
Pick1	-0.0248896	0.787912	0.920703	19.2894	19.8281	19.1764	19.6061
Zfp952	0.32346	0.180938	0.458961	1.31093	1.09134	1.53022	1.53019
Rbm15	0.139632	0.356402	0.655726	3.342	3.67265	3.62129	4.16582
Nelfe	-0.00687189	0.934489	0.977844	36.799	37.962	39.1028	35.9942
Mink1	-0.198479	0.0659835	0.253788	5.23893	5.49517	4.78234	4.65391
Snrpa	-0.0130744	0.845026	0.944983	119.011	118.555	116.078	121.567
Net1	0.0843969	0.480094	0.75222	5.38265	5.32634	6.16482	5.29802
Dph3	-0.0628841	0.563944	0.803572	9.0367	9.6267	9.6157	8.41977
Pard6a	0.540943	0.012252	0.0772995	3.35455	3.24213	4.65619	5.04124
Ttc21b	0.106329	0.636027	0.848137	0.954515	1.0849	1.08506	1.12568
Agtpbp1	-0.0734326	0.775922	0.917334	1.1568	1.27702	1.15212	1.17848
Dusp16	0.0356695	0.835379	0.940171	2.35001	2.22433	2.66413	2.07242
Rpl38	-0.0282251	0.931066	0.976378	6.29003	6.78883	6.70954	6.21964
Idnk	0.163675	0.518921	0.779086	2.28069	2.35273	2.48723	2.76015
Hnrnpab	-0.105048	0.0582064	0.234194	232.995	235.851	223.763	216.309
Bdnf	-0.61881	0.281996	0.58254	0.230902	0.16796	0.148441	0.113878
Mon1b	0.391142	0.0252264	0.13135	1.65712	1.40298	2.12802	1.93444
Syce1l	0.995021	0.316338		0.29954	0.108634	0.374435	0.446835
Azi2	-0.247941	0.314849	0.617328	1.6851	1.73616	1.64207	1.2735
Zgpat	-0.0169498	0.888746	0.961068	9.0793	9.26037	8.89954	9.39295
Nfyc	0.0220889	0.823563	0.933985	16.7966	16.3452	16.8316	17.133
Jak2	-0.132024	0.703085	0.8838	0.497824	0.368311	0.463264	0.335948
Ghr	-0.389899	0.661872		0.217491	0.270435	0.207139	0.172151
Ccl27a	-0.230654	0.58783	0.819192	2.48297	2.16119	1.53792	2.45976
Agbl5	-0.00720111	0.947561	0.983144	7.10929	7.38074	7.30196	7.26036
Zfp455	0.673821	0.439004		0.106415	0.0793916	0.215368	0.0777514
Gypc	0.0796096	0.906003		0.201558	0.246708	0.299196	0.177182
Med14	-0.237626	0.0792091	0.280971	2.24722	2.37026	1.90788	2.04654
Dbndd2	-0.214269	0.627219	0.843632	0.37247	0.32587	0.3024	0.299498
Smim15	-0.116633	0.328359	0.631428	12.1264	13.2128	12.7334	10.8461
Tnpo1	-0.311128	0.00332254	0.0273348	5.45523	5.96983	4.74978	4.54109
Usp33	-0.0714173	0.573737	0.808748	4.27741	4.81281	4.60381	4.1189
Lyrm9	0.0860385	0.725652	0.895837	0.758019	0.723632	0.838869	0.753843
Cbx5	-0.110101	0.073635	0.270748	25.5843	25.4836	23.6749	24.0874
Zfp874b	0.270935	0.195438	0.479157	1.27437	1.30254	1.62032	1.51772
Bsg	-0.00978225	0.884153	0.959546	102.798	110.061	108.263	105.047
Fcgr2b	-1.1679	0.00572859	0.0422783	1.06234	1.39866	0.602606	0.502246
Abi1	0.125058	0.29355	0.595052	5.49779	5.56999	6.35421	5.83059
Hs6st2	-0.123144	0.7275	0.89643	0.381056	0.400251	0.368889	0.351684
Odr4	0.00357275	0.984263	0.995038	2.37808	2.32719	2.29931	2.47511
Ap2a1	-0.224691	0.00194259	0.017559	28.7704	28.3657	24.5299	24.8453
Hnrnpd	-0.113281	0.0705719	0.264844	41.8184	40.9579	40.0464	37.2265
Plin5	0.283803	0.555027	0.79888	0.359757	0.560027	0.562135	0.566149
Gsta3	0.0403506	0.915374	0.970376	1.06129	1.06681	0.997922	1.2249
Nexmif	-0.874812	1.83264e-10	8.68381e-09	1.72248	1.6883	0.909147	0.969962
Git2	-0.0236274	0.841521	0.943297	4.10839	4.2766	4.37311	3.95319
Fhl1	-1.25093	2.26031e-17	4.35953e-15	8.43438	7.89436	3.93931	2.98112
Ptbp1	-0.130946	0.0269929	0.138132	140.382	144.635	135.674	127.097
Tsc22d3	-0.0318454	0.938512	0.97946	0.633761	0.643565	0.744208	0.52386
Nrp2	-0.374193	0.00868989	0.0589689	2.08949	2.10997	1.64011	1.62806
Gba1	0.0683791	0.592183	0.822492	7.91254	8.4947	8.60537	8.74858
Scn8a	-0.0180246	0.948794	0.983482	0.26913	0.254827	0.243981	0.279014
Gnas	-0.0807419	0.260178	0.55884	30.5157	31.1994	30.7414	28.1739
Nme2	-0.00657547	0.919233	0.971407	375.596	365.06	360.519	383.734
Tsks	-0.341799	0.648036		0.354303	0.157474	0.188464	0.231331
Shroom3	-0.50954	1.01252e-07	2.79545e-06	6.13095	6.32866	4.29901	4.52836
Ints14	-0.0988567	0.355216	0.654432	9.17642	9.59456	8.62691	9.05554
Pigw	0.188166	0.569358	0.806171	0.796942	0.953122	1.09506	0.917873
Prmt2	0.003769	0.983839	0.994929	3.27477	3.63335	3.41131	3.5669
Urgcp	-0.306045	0.0222274	0.119836	2.94703	2.97894	2.53248	2.31423
Cfap210	0.574016	0.235571	0.530142	0.478335	0.426753	0.707556	0.632001
Lrba	-0.663249	0.0107445	0.0696991	0.454576	0.53843	0.304621	0.327569
Dysf	-0.90047	2.39579e-05	0.00039671	1.34133	1.38728	0.578261	0.901443
Hdac5	0.00243346	0.980569	0.994176	8.45511	9.37178	8.87737	9.12234
Fmnl1	-0.146506	0.598345	0.82594	0.849239	0.879369	0.690939	0.884604
Ptpn6	0.0993076	0.423659	0.710456	8.19126	7.61458	8.44979	8.65107
Shprh	0.0678754	0.677003	0.869043	1.29847	1.33035	1.34807	1.43467
Slc39a7	0.00138149	0.985112	0.995221	51.2021	54.4679	51.5612	55.1393
Stag2	0.179733	0.0867065	0.296247	4.18004	4.27723	4.76855	4.89834
Sdhaf3	-0.0614117	0.855687	0.949255	3.89268	3.63958	4.14393	3.21116
Srsf1	-0.0303681	0.673478	0.867653	46.8069	45.2324	48.707	42.3347
Henmt1	0.416915	0.596977		0.201082	0.171657	0.16435	0.336221
Tmem134	0.0308401	0.797133	0.924325	15.6777	15.218	14.6044	17.277
Zbtb33	0.211026	0.340967	0.642124	0.90694	0.912522	1.15104	0.97878
Syne1	-0.544034	0.274182	0.575248	0.0874847	0.130774	0.0919247	0.0599832
Srsf5	-0.0324012	0.638482	0.848995	101.323	101.59	105.02	95.3303
Glyr1	-0.0566594	0.42209	0.708795	31.8911	32.6106	32.2919	30.3119
Tcf7l1	-0.477772	2.12642e-09	8.52683e-08	47.254	41.7878	31.9798	32.638
Hnrnph3	0.178448	0.0455688	0.200134	21.0391	20.1946	22.8332	24.307
Trim33	-0.0727478	0.420732	0.708052	4.61648	4.72497	4.50437	4.45996
Gpc6	-0.0137503	0.983473		0.0668595	0.0846468	0.0709134	0.0777169
Paip1	0.290816	0.0205678	0.113297	3.84067	3.45168	4.51946	4.49269
Bcl11b	0.871442	0.111863	0.344519	0.0710122	0.0678393	0.149389	0.1063
Repin1	0.187963	0.342059	0.643033	1.82481	2.17159	2.51027	2.06533
Fgfr1	0.457416	7.23869e-09	2.46584e-07	11.8772	11.3849	15.8995	16.372
Trim72	0.381265	0.434015	0.719479	0.350598	0.305161	0.410433	0.462517
Med1	-0.26002	0.0189123	0.106688	4.52786	4.07696	3.61594	3.64741
Casp8	0.70827	0.0229321	0.122334	0.982304	0.663619	1.41353	1.31442
Rnps1	-0.0281842	0.803657	0.926176	12.4866	12.692	12.9944	11.9302
Tmpo	-0.00128814	0.98774	0.995808	19.9076	21.9472	22.2556	19.9419
Cenpm	-0.285486	0.00180612	0.0165202	40.2999	37.9611	31.9885	32.9109
Clta	-0.143585	0.0490084	0.209431	131.457	131.503	112.973	127.27
Srsf10	0.23536	0.00512995	0.0387905	20.7669	21.8586	26.7193	23.9126
Mark2	-0.108097	0.230059	0.523275	11.1674	10.4669	10.5261	9.76181
Usp6nl	-0.192729	0.331469	0.633981	1.39776	1.34076	1.29795	1.11974
Hdx	-0.42915	0.485127	0.7553	0.141962	0.181134	0.145193	0.0990095
Gsg1	0.625341	0.449839		0.169427	0.265445	0.225908	0.447711
Vamp1	0.608081	0.117444	0.354628	0.365893	0.386719	0.560832	0.590372
Btaf1	-0.0939421	0.323046	0.62558	4.32789	4.3737	4.0317	4.19432
Gtf2i	0.187882	0.00546117	0.0406884	30.713	32.0873	35.3054	36.8787
Ambra1	-0.129102	0.140597	0.393949	9.6447	9.89384	8.80369	9.2262
Zzz3	0.144751	0.145927	0.403494	4.44732	4.90788	4.98575	5.43704
Bltp3a	-0.0117484	0.912478	0.969568	3.3719	3.52021	3.248	3.64654
Pdpk1	-0.527099	0.287189	0.588296	0.641784	0.664202	0.567446	0.340251
Myo1c	-0.433215	2.93739e-06	5.85938e-05	10.5357	9.49612	7.62643	7.36882
Ret	-0.360652	0.468186	0.743752	0.131128	0.146744	0.103032	0.112575
Ash2l	0.588765	1.24407e-21	4.33779e-19	64.118	66.8244	102.174	96.6013
G3bp2	-0.042384	0.514999	0.776675	66.3279	68.9827	69.613	63.0285
Aff1	-0.389671	0.000369926	0.00443975	3.39581	3.51361	2.56181	2.75789
Bicdl1	-0.142487	0.249801	0.546117	6.24443	6.10417	5.52598	5.76871
Cps1	0.395503	0.466763	0.742438	0.116711	0.113473	0.170725	0.13653
Rab11fip1	0.436093	0.0026779	0.0228339	1.46308	1.47821	2.20803	1.80904
Gipr	0.763566	0.153679	0.41568	0.324277	0.362895	0.472916	0.700923
Cdc14a	-0.0937674	0.795329	0.923407	0.420547	0.376732	0.364534	0.384649
Arid1a	-0.265181	4.87703e-05	0.000750827	26.5031	26.4353	21.5712	22.8872
Cass4	0.0448266	0.88457	0.959546	0.617606	0.610588	0.6917	0.579714
Znrf3	-0.222637	0.231048	0.524444	1.14142	1.31107	1.08372	1.03053
Rapgefl1	-0.0941306	0.822087	0.933237	0.287739	0.423173	0.268729	0.405972
Lrp8	-0.53403	0.0238273	0.125714	0.714358	0.689043	0.537196	0.441035
Rbpj	-0.347407	6.3511e-07	1.49193e-05	21.0987	21.6658	17.3217	16.6108
Cdr2l	-0.481382	0.00072572	0.00789357	4.39996	4.17393	3.32326	2.87705
Atxn1l	0.440403	0.00303228	0.0253273	1.36561	1.25492	1.82267	1.77161
Med13	0.0250635	0.839407	0.9422	1.83213	1.66625	1.78618	1.81203
Foxk2	0.0648858	0.524777	0.781231	5.72504	6.34525	6.3617	6.36768
Slc16a5	-0.217234	0.763537		0.118288	0.201956	0.170612	0.104709
Zfp429	-0.0985886	0.907307		0.209813	0.106038	0.135366	0.164425
Ttc5	-0.137154	0.124579	0.367437	24.0357	23.6722	22.0768	21.7134
Sp2	-0.118054	0.226092	0.519354	14.165	13.2158	13.5134	11.9819
Aurkc	0.223471	0.502452	0.768316	1.8355	1.55064	1.81455	2.19353
Tmsb15b2	0.0997511	0.762522	0.912411	3.69177	3.25746	4.79232	2.82706
Golga2	-0.201346	0.0756263	0.273644	5.39848	5.57884	4.78104	4.84918
Thg1l	-0.173589	0.074672	0.27258	9.5566	9.17826	8.56134	8.22493
Sri	-0.0196144	0.877963	0.957931	6.91066	7.15663	7.34707	6.66384
Rsbn1l	-0.0964735	0.5525	0.796708	1.8006	2.27983	1.98183	1.85955
Tead4	-1.33209	5.33596e-08	1.56636e-06	2.20593	2.09903	0.753634	0.974052
Ddx23	0.019309	0.801672	0.92563	40.0481	38.8983	38.3706	42.4026
Ddias	0.513312	9.71329e-05	0.00139063	4.93182	6.10229	8.7043	7.15319
Trmt2a	0.170348	0.0274583	0.139704	17.3835	17.7002	20.287	19.5606
Brca2	-0.0305082	0.751623	0.90784	4.66667	4.90134	4.34849	5.10325
Etl4	-0.106664	0.191844	0.474979	7.91114	7.85262	7.32815	7.44835
Zfp382	0.523711	0.0225251	0.120903	0.47755	0.440511	0.683468	0.65707
Parp8	-0.482868	0.358867	0.658234	0.108858	0.172582	0.0947676	0.104392
Srgap2	-0.356645	0.0011115	0.0110858	3.49522	3.85307	2.81866	2.96846
Zc3h7b	0.00100155	0.991893	0.997355	5.68888	6.25999	6.06302	5.98851
H3f5	0.739809	0.527283		0.197096	0.0735228	0.10559	0.360019
Adamts6	0.680335	0.493221		0.034458	0.0211711	0.0253374	0.0622011
Zfp780b	-0.0329671	0.893085	0.962558	0.735076	0.787294	0.859687	0.643586
Katnip	0.0586631	0.792976	0.922668	0.740663	0.734697	0.775714	0.767866
Cacna1s	1.47449	6.16942e-05	0.000928395	0.165549	0.17917	0.370317	0.598822
Cfap91	-0.744873	0.0445818	0.197542	0.823935	0.723675	0.424462	0.504407
Kcnt2	0.169566	0.821531		0.053187	0.0390607	0.0373981	0.0658813
Sipa1l3	-0.118391	0.245645	0.540689	4.01487	4.19626	3.69882	3.93168
Tmem243	0.179246	0.458353	0.736362	3.92778	3.64991	4.24588	4.39664
Sbf1	-0.158898	0.0870611	0.297051	8.02931	8.36901	6.97843	7.83963
Fbxo11	-0.194322	0.134044	0.383775	3.75441	3.4878	3.23826	3.15726
Nav3	-0.328098	0.672952		0.0353304	0.0461275	0.0373697	0.0295372
Srgap1	-1.26664	5.74823e-06	0.000109404	0.665919	0.558093	0.225217	0.289091
Dock9	-0.121631	0.516665	0.778052	0.967227	0.877588	0.83587	0.877317
Coq10a	0.334017	0.181216	0.459149	1.23959	1.40358	1.72779	1.62706
Vps51	0.132579	0.261391	0.560522	7.08389	7.71755	8.33805	8.01334
Ptpn23	0.0552375	0.549272	0.795742	12.8883	12.5647	12.243	14.455
Kansl1	0.102033	0.239752	0.534735	8.77565	8.87598	9.34504	9.77036
Efcab3	-0.0444846	0.945392	0.982256	0.514606	0.289422	0.178137	0.597254
Cnksr1	-0.495217	0.142185	0.396716	0.908915	1.0475	0.771475	0.624127
Slc25a18	1.40327	0.105354		0.182156	0.0792744	0.430101	0.284668
Nhs	-0.0905762	0.90112		0.0749022	0.0910484	0.0581153	0.0990748
Qrsl1	0.0040036	0.974363	0.992917	8.7795	8.97427	8.77622	9.18307
Trappc10	-0.167236	0.25959	0.558014	1.93939	2.29443	1.97195	1.82589
Xpot	-0.131727	0.0742712	0.271699	13.7949	13.8718	12.8197	12.6672
Tecpr2	-0.023688	0.892816	0.962558	1.16099	1.14659	1.01435	1.27561
Cdk13	-0.112392	0.328756	0.631732	3.5188	3.8517	3.69989	3.17901
Mcur1	-0.291871	0.273841	0.574752	0.889957	0.795222	0.650916	0.738441
Bdp1	-0.363333	0.00780966	0.0543597	1.59468	1.74136	1.25954	1.35224
Ccno	0.854351	1.94625e-05	0.000326217	2.26461	2.55481	4.69974	4.07634
Pdzd2	-0.373334	0.204176	0.492034	0.266967	0.334486	0.279843	0.186749
Zfp707	0.618288	8.58343e-05	0.00124911	4.73165	4.45899	6.66434	7.62098
Dennd3	-0.46127	0.106525	0.334807	0.649994	0.604228	0.425757	0.495337
Ltn1	-0.106037	0.296114	0.598169	4.09144	3.92212	3.73738	3.78648
Rgs11	0.300174	0.373003	0.670217	0.921891	0.90049	1.00728	1.24861
Lclat1	-0.932781	0.000309477	0.00381628	1.1299	1.0142	0.537329	0.596732
Cep76	0.17644	0.21122	0.501618	2.78778	2.95475	3.48093	3.06439
Fra10ac1	0.0561938	0.664322	0.862541	11.6501	10.808	11.9118	11.6845
Gucy2g	0.535023	0.303968	0.605831	0.166059	0.18913	0.295911	0.212329
Cwf19l1	0.0669449	0.569762	0.806358	5.38106	5.35326	5.71199	5.64595
Lct	2.74619	0.0340969		0.00668348	0.00581732	0.0445577	0.0569714
Ogfrl1	-0.152637	0.438678	0.723106	1.44071	1.52183	1.52441	1.16765
Phf3	-0.0769976	0.311478	0.613989	9.9643	9.88166	9.71099	9.28939
Gls	0.108458	0.520273	0.779712	1.6777	1.8398	2.04873	1.76639
Cubn	1.4323	0.0039596	0.0314426	0.077966	0.0302197	0.124871	0.17913
Sapcd2	0.0499687	0.72994	0.897547	3.63186	3.9462	3.70761	4.18458
Ppig	0.0236344	0.793729	0.922772	17.8449	14.9185	17.6293	16.0423
Lrp2	-0.75038	1.69103e-10	8.04063e-09	1.80382	1.72869	1.11793	1.00528
Gpat2	-0.611939	0.000265965	0.00333528	4.79719	5.47947	2.95553	3.81766
Esf1	0.00140768	0.989306	0.996543	10.1502	9.08398	10.2053	9.25984
Cep152	0.150397	0.301804	0.604226	1.99542	2.19651	2.23446	2.45974
Taf4	-0.201588	0.0492391	0.210047	6.8468	6.81005	6.02223	5.97298
Arfip1	-0.248003	0.134947	0.384819	3.40157	3.4241	3.14008	2.65793
Znhit6	0.118236	0.203652	0.491507	13.6095	14.1446	14.6869	15.7052
Grik3	-0.816927	2.12975e-08	6.73553e-07	1.73259	1.73852	0.987236	1.00395
Zfp362	0.555266	0.0380633	0.177292	0.983883	0.922889	1.5881	1.24581
Aunip	0.298162	0.00762399	0.0533758	15.9561	17.4358	20.6096	20.79
Morn1	0.33601	0.385702	0.680338	0.74188	1.00125	0.937794	1.25768
Uvssa	-0.344244	0.420486	0.70792	0.189458	0.208172	0.185242	0.122323
Nsd2	0.123654	0.229325	0.522653	3.81979	4.01359	4.30259	4.30442
Stim2	-0.25345	0.162561	0.430665	1.81486	1.576	1.4319	1.45392
Chrna9	0.124457	0.594184	0.823392	1.92357	2.20646	2.30147	2.23115
Helq	0.165385	0.182851	0.461263	5.24865	5.08092	6.34601	5.34879
Lamtor4	-0.24983	0.0516067	0.216183	21.1745	22.322	17.3966	19.4654
Lmtk2	-0.184081	0.067917	0.258564	5.39469	5.24583	4.36642	5.08599
Tmf1	0.0502548	0.767216	0.913349	1.42557	1.60972	1.39164	1.7787
Ankrd26	0.280524	0.121773	0.362552	1.0264	0.938048	1.27316	1.14329
Ipo8	-0.0341018	0.745486	0.905106	5.29769	5.24459	5.43606	4.95868
Clip3	0.147268	0.224516	0.517095	5.46521	5.19621	5.89311	6.04367
Nccrp1	0.0163602	0.975692	0.993392	0.52896	0.677332	0.470481	0.767391
Arhgef17	-0.170477	0.222602	0.515161	1.53387	1.40919	1.25702	1.38693
Mki67	-0.13497	0.0483333	0.207485	12.4445	12.5492	11.313	11.6607
Phrf1	-0.0477871	0.510827	0.774412	16.4296	16.485	15.9434	16.2034
Abhd13	0.726381	4.61918e-08	1.36916e-06	2.25607	2.29568	3.96987	3.6318
Fam89a	0.604432	0.375515		0.400944	0.183216	0.463603	0.47421
Cep63	0.188732	0.126124	0.370299	7.3658	6.80801	7.68998	8.6453
Arhgap36	1.05349	0.341722		0.0772907	0.0118719	0.0852492	0.0930129
Map7d2	-0.069775	0.762401	0.912387	1.5962	1.34357	1.66197	1.17655
Gli2	-0.332826	0.000360019	0.00433988	6.15536	6.23869	5.09203	4.84173
Gpr161	-0.0693622	0.842972	0.943989	0.277137	0.283173	0.240995	0.295297
Adamts14	-0.584331	4.49139e-05	0.000697732	2.92369	3.21172	1.99892	2.12304
Mtr	-0.245732	0.0321885	0.157285	5.05465	5.31169	4.46531	4.35466
Cntnap3	-0.00913723	0.993735		0.0339833	0.036974	0.0601804	0.0181051
Ogdhl	0.00816976	0.919112	0.971317	17.106	17.4912	18.2721	16.8548
Dhtkd1	0.0233605	0.942356	0.980848	0.811193	0.570283	0.823889	0.608367
Upf2	-0.0508291	0.629431	0.844834	5.17605	5.42299	5.31198	5.00795
Kif16b	-0.12048	0.501942	0.768086	1.40996	1.46739	1.37329	1.29466
Kcng1	0.188238	0.714778	0.890257	0.175712	0.216175	0.232317	0.207388
Prrg3	-0.31254	0.403472	0.69426	0.296231	0.3082	0.266152	0.224895
Ankrd35	0.94662	4.61082e-07	1.11951e-05	1.20521	1.2012	2.23225	2.46564
Kcnq4	-0.366484	0.743386		0.0541185	0.0441608	0.0253687	0.0518982
Zfp518b	-0.0942901	0.422746	0.709534	3.22865	3.37956	2.94654	3.29954
Tigd2	0.0544849	0.779281	0.918475	2.04565	2.021	2.15758	2.11353
Prickle2	0.540372	0.482814		0.0281711	0.0528717	0.0484203	0.0720408
Cyp2b23	0.242977	0.108758	0.338676	4.74121	5.17632	5.56365	6.28021
Kat6a	0.493096	6.77124e-06	0.000126879	2.39693	2.67086	3.44474	3.73751
Lonrf1	-0.82887	3.49855e-06	6.92329e-05	2.63599	2.89891	1.68628	1.45447
Gan	0.107145	0.686481	0.875011	0.972332	0.962516	0.911585	1.17701
Npat	0.30967	0.0138975	0.0848284	2.23454	2.43118	3.1348	2.70161
Marf1	-0.17034	0.152919	0.414464	3.27386	3.11263	2.65	3.08458
Rap1gap	-0.13061	0.381857	0.677482	4.15867	4.07905	3.44287	4.14532
Trnp1	0.471747	0.386788	0.681376	0.415523	0.347206	0.498641	0.573805
Cluh	-0.118775	0.0855949	0.294137	20.5212	20.5837	19.0595	19.1559
Mdga1	-0.304214	0.394362	0.688258	0.230718	0.303598	0.229361	0.209057
Fam171a1	-0.159721	0.47183	0.745903	1.15098	1.27753	1.09048	1.10694
Slc4a11	0.24399	0.10596	0.334269	3.12388	3.29551	3.72696	3.92808
Chsy1	-0.0118906	0.937744	0.979068	2.90331	2.63804	2.95488	2.60026
Otud4	0.319952	1.95459e-05	0.000327415	9.70997	9.7373	12.6191	11.8919
Phf21b	0.0364018	0.86539	0.952855	1.32616	1.3649	1.35759	1.43116
Sap30l	-0.290453	0.0149081	0.0893441	13.6145	13.6098	11.3865	11.1015
Aspg	-0.53462	0.154222	0.4167	0.899	0.639621	0.467189	0.607034
Pacs2	-0.0932438	0.396331	0.689097	4.35957	4.50032	4.21763	4.16624
Lama5	-0.325844	0.045523	0.200029	12.0557	12.7031	8.91527	11.011
Frmpd1	-0.39311	0.480317	0.752355	0.157316	0.175518	0.132292	0.135319
Lrch2	0.0159222	0.943256	0.981084	1.1257	1.03573	1.28495	0.928613
Cplane2	-0.617439	0.597099		0.0436234	0.436654	0.236299	0.111556
Itpkb	-0.493034	0.520793		0.0700293	0.116046	0.0471363	0.0860977
Polr3g	-0.07707	0.416552	0.704796	13.492	13.9114	13.9206	12.3075
Kif13b	0.0456086	0.724233	0.89519	1.94432	2.12888	1.97258	2.26671
Adgrf5	-1.05843	0.0476484	0.205525	0.140151	0.115678	0.064439	0.0617937
Heatr5b	-0.216754	0.140577	0.393949	2.00145	1.93884	1.7572	1.66589
Maip1	0.0526648	0.653905	0.857401	5.57419	6.36112	6.29545	6.17116
Atp8b2	-0.356309	0.00271562	0.0230903	4.07628	4.10451	3.14005	3.30883
Virma	-0.11041	0.269465	0.569756	4.40696	4.52117	4.28036	4.06909
Focad	0.0444496	0.753893	0.909106	2.25835	2.12966	2.27749	2.2991
Flnc	-0.278939	0.0161558	0.0951257	2.49218	2.54885	2.04742	2.14811
Exosc7	0.119812	0.169788	0.441819	47.9596	48.8274	50.9216	55.1938
Uprt	0.223432	0.501141	0.767713	0.280359	0.284696	0.279879	0.38337
Eml5	0.116631	0.28172	0.582341	2.4326	2.35806	2.56517	2.67946
Lemd3	0.0934439	0.611742	0.834548	1.50522	1.40102	1.56979	1.57604
Kcnh4	0.338824	0.496377	0.763966	0.182102	0.299569	0.391529	0.218871
Arid4a	-0.192322	0.286858	0.588078	1.55377	1.37211	1.37925	1.20665
Hnrnpul2	0.0276585	0.674751	0.867977	27.2661	28.3215	28.0857	29.0906
Mamdc4	-0.173338	0.762112	0.912316	0.211278	0.167316	0.138546	0.19486
Dpy19l4	0.323073	0.104247	0.330894	0.76168	0.840233	0.985219	1.0312
L1td1	-0.0499633	0.372537	0.670116	156.39	156.922	153.519	151.996
Sbno1	-0.027646	0.71809	0.892289	8.25647	7.83703	7.87412	8.07166
B3glct	-0.168598	0.475291	0.748921	0.975791	0.97909	0.832004	0.928056
Nipal1	-0.0949507	0.936229		0.0522746	0.0255937	0.0245043	0.0543074
Dgki	0.585723	0.514402		0.0155798	0.0162728	0.0272653	0.0239049
Prdm14	-0.0972233	0.501815	0.768086	4.76187	5.39233	4.74474	4.80578
Mrpl44	-0.121439	0.203105	0.490532	25.9257	25.9452	24.8771	23.2701
Irs2	0.0638012	0.767045	0.913208	0.799714	0.6908	0.792666	0.787562
Ermp1	-0.285209	0.00543988	0.0405629	5.69242	5.93432	4.89782	4.73608
Pprc1	0.0997344	0.197649	0.482805	38.1966	36.7953	37.7602	43.3494
Phip	0.0651373	0.631893	0.845777	1.32157	1.28152	1.42907	1.31739
Zfp174	-0.443173	0.506568		0.110862	0.0814175	0.0837262	0.0649696
Hcfc2	-0.106239	0.73425	0.899811	0.949267	1.17891	1.10702	0.888118
Myo1a	0.567252	0.411913		0.144383	0.0861747	0.13923	0.216261
Gpr179	0.134918	0.865323		0.032504	0.0385795	0.0369374	0.0415607
Ercc6	-0.0385116	0.772875	0.916066	1.72873	1.85635	1.81407	1.71364
Esco1	-0.0286597	0.862645	0.952014	1.96885	2.14739	2.14686	1.92099
Rbbp8	0.00969412	0.942861	0.981045	4.50214	3.97674	4.25541	4.39176
Slf2	0.131843	0.211514	0.5019	3.80008	3.6636	4.06769	4.19144
2310009B15Rik	0.124689	0.693003	0.878947	3.56131	4.71293	5.11801	3.93407
Tsc22d2	0.291089	0.0403137	0.184572	1.20711	1.1628	1.52643	1.40557
Map9	-0.347747	0.0986224	0.320282	1.10326	0.958357	0.892691	0.746323
D5Ertd579e	0.248915	0.149442	0.408842	1.12356	1.28919	1.34607	1.53533
Pigg	-0.00570608	0.979739	0.994176	1.05041	1.06574	1.07575	1.04777
Mn1	0.187205	0.611504	0.834367	0.224561	0.230362	0.243114	0.282004
Spring1	0.00308636	0.985373	0.995221	3.29033	3.17988	3.22476	3.33146
Klhl42	0.00683293	0.972568	0.992292	0.916797	0.962487	1.02855	0.873175
Palb2	0.16848	0.199337	0.485025	3.89157	4.46731	4.63512	4.82097
Prmt9	0.414503	0.000433835	0.00506906	6.1004	6.10132	8.35667	8.07896
Ripor1	0.126364	0.389991	0.684289	2.65302	2.73618	2.98681	2.957
Tln2	-0.0315878	0.756508	0.909945	2.46671	2.66303	2.48296	2.58042
Polr3a	-0.16422	0.0800813	0.282565	9.05622	9.48518	8.01889	8.68373
Vcan	-0.421137	0.00997355	0.0658047	0.853773	0.953182	0.644764	0.71318
Myh13	-0.206663	0.361163	0.659611	0.900738	0.870551	0.690194	0.855557
Pbrm1	0.14399	0.179438	0.456684	3.22871	3.14994	3.41458	3.70313
Uggt2	-0.341252	0.539888	0.790128	0.148287	0.105099	0.111218	0.0920933
Fam186b	0.413212	0.707135		0.0474772	0.0394459	0.0755338	0.0551871
Lrch3	-0.0627448	0.711598	0.889148	1.61663	1.61869	1.41313	1.71612
Kdm3b	-0.155255	0.0554723	0.226577	8.54937	8.59769	7.69714	7.85097
Flvcr1	0.339274	0.0685396	0.259987	1.45703	1.54206	1.97277	1.8544
Tnks1bp1	-0.180432	0.130618	0.377837	3.99194	4.20012	3.39646	3.88703
Alg6	0.352977	0.0823749	0.287088	1.56737	2.04637	2.30795	2.32678
Dnaaf5	-0.384222	0.000103628	0.00147208	10.9842	10.5911	8.61796	8.08267
Ccdc142	0.26002	0.44972	0.730542	0.518938	0.597143	0.687171	0.66353
Rsf1	-0.116472	0.269393	0.569697	2.4164	2.45396	2.29552	2.24231
Prss53	0.474684	0.00370821	0.0298707	3.44713	3.15681	4.34306	4.9368
Dscaml1	-0.234216	0.670782	0.866044	0.119149	0.118649	0.123696	0.0800473
Pgd	-0.345692	1.54387e-07	4.14543e-06	68.2872	68.138	54.187	54.184
Cfap126	-0.0996512	0.872493		0.611548	0.56778	0.5606	0.538673
Ak5	0.892099	0.315244		0.0580501	0.0595497	0.150312	0.0848282
Tbc1d4	0.290927	0.57796	0.811844	0.10771	0.129809	0.183836	0.103291
Mfhas1	-0.160997	0.692098	0.878721	0.205299	0.248495	0.192473	0.213283
Nlrc3	-1.25148	0.0330488	0.160543	0.174095	0.197391	0.0400887	0.114231
Ibtk	0.012758	0.894926	0.963422	5.93247	6.32126	6.16812	6.29988
Nalf2	-0.294277	0.229753	0.523109	1.11196	0.910185	0.727403	0.939264
Mup6	0.379006	0.153622	0.415587	3.18854	3.24014	4.20175	4.23763
Fat1	-0.0935076	0.170935	0.443971	7.84283	7.81278	7.45088	7.36554
Mpp7	0.0675198	0.724034	0.895126	1.43874	1.53886	1.37306	1.77594
Taf2	0.0379242	0.710116	0.888428	6.28765	7.23266	7.13372	6.84853
Prrc2c	-0.171512	0.0162021	0.0952732	12.4685	13.3183	11.2526	11.8453
Ccdc88b	0.850802	0.00865953	0.0588864	0.314298	0.326826	0.552816	0.604584
Rprd2	0.0157874	0.889049	0.961239	2.82043	3.3054	3.12188	3.10987
Prr19	-0.0170931	0.941821	0.98082	3.66228	3.09963	3.40686	3.38952
Arhgef26	0.288522	0.163352	0.431968	0.946039	0.979841	1.13633	1.23667
Adgrl2	-0.482915	0.00327779	0.026991	1.84741	1.74364	1.34237	1.25672
Cdh18	0.482348	0.473638		0.110461	0.216328	0.188291	0.250379
Tshz1	0.66824	0.306137		0.0576045	0.0877435	0.108011	0.119689
Trio	-0.110758	0.596251	0.824961	0.471142	0.507126	0.461563	0.450663
Atf6	-0.278948	0.0536675	0.221763	1.84734	2.02233	1.72214	1.49307
Ptprz1	-0.0637209	0.933704		0.0631352	0.0334174	0.053325	0.043636
Ppp1r12b	0.448127	0.090486	0.30404	0.292984	0.330722	0.41965	0.437055
Taok3	-0.708647	0.00634472	0.0456806	1.0988	1.00167	0.601431	0.694168
Pik3r4	-0.0452447	0.625824	0.842843	7.95041	7.98667	7.66082	7.93346
C2cd4b	0.260991	0.679302		0.372279	0.405041	0.568774	0.357005
Brpf3	0.0797757	0.306287	0.608442	11.5627	12.458	12.7132	12.8893
Dsel	-0.0601126	0.85299	0.94839	0.361914	0.397909	0.369067	0.365333
Ric1	0.0739701	0.720351	0.893471	0.815633	0.993328	0.962011	0.955985
Cyb561d1	0.196094	0.466161	0.741805	0.763249	0.667185	0.87219	0.787432
Pds5a	0.0545131	0.481623	0.753065	7.88586	7.9406	8.10754	8.48084
Myo5c	0.341088	0.138524	0.390753	0.586292	0.567408	0.761072	0.718198
Mphosph9	-0.0531278	0.697932	0.881036	1.92288	1.88695	1.76224	1.94785
Neto2	0.682754	0.0315288	0.154751	0.308869	0.344722	0.582257	0.471367
Agl	0.19215	0.288719	0.589887	0.73359	0.698263	0.849085	0.800858
Zkscan2	0.373435	0.668875		0.0364947	0.0476476	0.0669087	0.052885
Dnah2	0.257429	0.56201	0.803168	0.0694879	0.0854643	0.0906387	0.094
Slc9a5	0.714939	1.84996e-05	0.000311453	1.33855	1.32792	2.10143	2.31459
Plekhg4	0.575761	0.199408	0.485155	0.213855	0.200031	0.331165	0.293848
Cul9	0.469395	0.190769	0.473301	0.184565	0.192775	0.261473	0.258465
Dgkh	-0.479047	0.0414041	0.187698	0.333918	0.341403	0.252797	0.236932
Sipa1l2	0.0433061	0.725564	0.895769	2.82948	3.2868	3.1071	3.23518
L3mbtl1	0.00556798	0.994463		0.0593605	0.0673924	0.0483929	0.0792002
Setd2	-0.1886	0.0196463	0.109774	7.88616	7.86029	6.81967	7.1294
Scaper	-0.342153	0.0582768	0.234397	1.57513	1.65615	1.36288	1.20975
Adgrd1	-0.682148	0.132142	0.380398	0.344476	0.226618	0.166901	0.191206
C9orf72	0.0735421	0.705395	0.885044	2.13244	1.86559	2.11938	2.14552
Stxbp5	0.0811775	0.77208	0.915762	0.301652	0.330507	0.3676	0.308173
Chd2	0.36773	0.000213662	0.00277994	3.88742	4.29628	5.00746	5.64044
Rhobtb1	0.0838977	0.873652	0.956535	0.146383	0.228511	0.218785	0.179032
Slc43a1	-0.0775809	0.624728	0.841989	4.13761	3.90426	3.87401	3.8236
Cped1	-0.077479	0.927902		0.0675204	0.05877	0.0492349	0.0683475
Skic3	-0.244988	0.094679	0.313318	2.70115	2.64675	2.44237	2.11604
2210408I21Rik	-0.331546	0.459302	0.737124	0.747799	0.678292	0.619902	0.513306
Prdm2	0.223024	0.04593	0.20117	2.90559	3.16783	3.49817	3.6527
Vma21	-0.097248	0.561185	0.802862	2.26465	2.11074	2.14362	1.99599
Lrrc7	0.271356	0.468779	0.744077	0.0646891	0.0734077	0.101268	0.06648
Ubr5	-0.22674	0.000354753	0.00429341	26.9186	27.9527	23.0775	24.2398
Trrap	0.00189726	0.980784	0.994191	6.03159	6.30624	6.02124	6.44165
Cenpf	-0.178974	0.0281342	0.142242	6.11013	5.81978	5.24321	5.39949
Arhgap21	-0.356654	0.000396127	0.00469253	5.0281	5.56033	4.1588	4.17789
Cystm1	-0.500983	0.125108	0.368439	4.16016	4.30881	2.90522	3.14999
Vps8	0.302695	0.0791887	0.280936	1.66485	1.53412	1.83688	2.14983
Tbccd1	0.0512903	0.764296	0.912689	4.09453	4.43564	5.27786	3.64092
Shank2	0.672261	0.420861		0.0426841	0.0232202	0.0666956	0.0409329
Dmxl1	0.172422	0.278597	0.579244	0.774316	0.902056	1.01864	0.88342
Cep164	-0.164396	0.105975	0.334269	6.55968	6.11132	5.5197	5.90829
Chd5	-0.459938	0.0227033	0.121611	0.711609	0.73568	0.508305	0.553359
Kidins220	-0.109693	0.512574	0.775296	1.24691	1.57694	1.34465	1.28499
Ankrd11	0.392851	1.22159e-08	4.00681e-07	13.2207	13.3119	17.1073	18.0526
Elp6	-0.233336	0.0962059	0.315858	7.11303	8.49403	6.88968	6.49273
Zfp777	0.23393	0.0345116	0.165245	6.90696	7.63307	8.78859	8.45288
Kmt2c	0.0675715	0.602739	0.829205	0.999904	0.959346	0.981928	1.09123
Ctcfl	-1.29363	0.0201995	0.111898	0.3167	0.368784	0.128395	0.153222
Rimbp2	0.0565147	0.89513	0.963503	0.157228	0.18475	0.179343	0.183446
Palld	0.557181	0.00162454	0.0151388	2.07558	1.66194	2.9614	2.61773
Mdn1	-0.219155	0.00369692	0.0297922	6.64993	7.07589	5.69471	6.20011
Tmem248	0.0222949	0.787916	0.920703	14.6155	15.4498	15.5306	15.2719
Amotl1	-0.405984	0.0130574	0.0811291	1.15407	1.3084	0.911234	0.959553
Tbc1d31	-0.101064	0.485317	0.7553	3.81197	4.29233	3.98998	3.61301
Prss33	1.75389	0.114921		0.0897531	0.0651011	0.174524	0.280527
Hapstr1	-0.0456947	0.647084	0.853759	7.85388	8.10643	8.14061	7.46486
Adamts3	-0.779916	0.150679	0.410422	0.148829	0.130331	0.05672	0.109073
Wdr70	-0.0566434	0.663576	0.862275	7.61221	7.74584	7.15071	7.77505
Lrr1	0.0764976	0.65248	0.85693	5.41346	5.46532	5.86245	5.72719
Plb1	-1.43839	0.072888		0.117321	0.119551	0.0321926	0.0585407
Agmat	1.0672	0.367416		0.0982959	0.0513342	0.208884	0.125684
Phf20l1	0.114115	0.569602	0.806298	0.878807	0.84841	1.01086	0.880999
Sclt1	0.0201	0.90723	0.967797	2.65827	2.76577	2.88825	2.66182
Bcr	0.0608068	0.626957	0.843628	3.15222	2.74095	3.21916	2.99395
Unc13b	-0.154603	0.393373	0.687509	1.30809	1.20421	1.08561	1.19587
Samd1	0.187008	0.0156786	0.092865	29.0583	30.9804	34.9164	34.0331
Fndc1	0.00919428	0.988749		0.0913557	0.0960014	0.128124	0.0598297
Bicra	-0.10271	0.526856	0.782343	1.8449	2.0871	1.73525	1.96196
Dip2a	0.420578	0.0986292	0.320282	0.447305	0.612352	0.689431	0.730192
Abitram	0.0735574	0.657907	0.859638	1.93972	2.2196	2.22099	2.186
Galnt16	0.0298165	0.953924	0.985368	0.210688	0.210891	0.23703	0.202044
Bod1l	-0.233337	0.0385409	0.178908	2.27168	2.46847	2.08286	1.9837
Ttll5	-0.223516	0.148895	0.408272	2.34209	2.28042	2.04513	1.95415
Dip2c	-0.184133	0.360005	0.65903	0.791654	0.851981	0.798544	0.65872
Flnb	-0.358039	1.0663e-05	0.000191627	8.57642	9.5181	7.3006	6.93298
Fam184a	0.0250711	0.960156	0.987969	0.244239	0.200439	0.222438	0.236449
Ccdc15	0.0164971	0.944538	0.981867	0.338089	0.359779	0.338676	0.373073
Zscan25	0.159334	0.214496	0.506235	5.18868	5.82596	6.12634	6.26047
Ankrd44	0.114287	0.798737	0.924801	0.161585	0.187525	0.185154	0.19226
Fbxo47	-1.28418	0.265734		0.139753	0.160996	0.0308287	0.0840908
Ino80d	-0.283607	0.030057	0.149483	1.84274	1.96445	1.37647	1.77497
Fbln2	0.0570399	0.621291	0.839878	4.69146	4.67787	4.90361	4.9305
Wdr86	-0.276882	0.20336	0.490889	3.44735	3.36307	2.44868	3.22456
Ncam1	-0.264252	0.169783	0.441819	1.41928	1.14143	1.13178	1.02399
Iqck	0.421311	0.62512		0.273153	0.106989	0.193488	0.325978
Nin	0.20895	0.335858	0.637655	0.459256	0.514214	0.54387	0.590855
Furin	-0.27049	0.123975	0.36648	2.19238	2.56062	2.19986	1.76891
Plcd4	0.28564	0.609467	0.833353	0.27263	0.217523	0.359729	0.245306
Ppp2r5c	-0.101179	0.231088	0.524482	16.0231	15.3459	15.5398	14.0064
Sh2b1	0.128016	0.160279	0.426601	11.8625	12.5448	13.0878	13.7997
Gtf2ird1	0.0310333	0.766815	0.913197	5.96583	6.11362	6.55242	5.91581
Zxdb	-0.0488397	0.957438		0.0439183	0.0509688	0.0548993	0.0374369
Nasp	0.0992245	0.112372	0.34553	219.977	210.004	226.483	238.48
Brwd3	-0.430576	0.0165591	0.0967823	0.66813	0.759939	0.566204	0.500745
Fbxo9	0.0559727	0.734281	0.899811	5.06093	5.09699	5.7758	4.87715
Tbc1d8b	-0.283338	0.711388		0.0792348	0.0943214	0.122351	0.0238381
Rcan1	-0.121732	0.341121	0.642312	8.43337	10.4452	9.07152	8.39605
Camta1	-0.468755	0.0191771	0.107694	0.815703	0.860916	0.580043	0.643277
Mapk10	-3.20279	0.00615995		0.0833446	0.0598483	0.0104183	0.00532835
Ess2	0.0222616	0.825642	0.934871	10.2182	10.5018	10.574	10.6597
Ccnd3	-0.593674	2.31506e-19	6.67419e-17	86.7913	84.5005	57.1359	57.4747
Xlr4a	0.0253235	0.977174		0.19755	0.318609	0.319574	0.163443
Xlr3b	-0.626076	0.170882	0.443949	0.887968	0.758027	0.501629	0.578609
Rgs3	0.911251	0.25417		0.0722061	0.05387	0.128943	0.101118
Nacad	-0.0814421	0.913838		0.0898613	0.0769934	0.0737162	0.082584
Tex264	-0.333864	0.00884994	0.0598327	12.5776	12.9312	10.1571	10.2665
Dact3	-0.354854	0.0443559	0.196891	3.30902	3.34964	2.39315	2.85174
Neurl1b	0.298022	0.573052	0.808208	0.0963033	0.137164	0.15595	0.134331
Fam90a1a	1.24215	0.210875		0.0437626	0.123796	0.218818	0.158543
Klhl34	0.152435	0.851511		0.125465	0.122856	0.0914872	0.187161
Nup62cl	-1.48098	2.61487e-15	3.02177e-13	9.62437	10.9308	3.59082	3.84563
Fam43b	-0.796532	0.355335		0.162413	0.166608	0.0725075	0.11125
Zfp800	-0.0471285	0.929314	0.975698	0.169368	0.216875	0.166929	0.212394
Tomt	0.235312	0.3519	0.651029	2.3075	3.34594	3.34392	3.34209
Zfp72	0.0565259	0.863291	0.952244	0.592506	0.932137	1.00287	0.58349
Gnb1l	0.152145	0.341763	0.642827	2.64004	2.57028	2.77856	3.07493
Zbtb21	0.275979	0.0132277	0.0819082	3.49822	3.83152	4.53365	4.41313
Dnmt3l	-0.0682864	0.286369	0.587452	122.461	121.622	114.623	120.362
Zfp664	-0.143751	0.115425	0.350837	10.2775	10.7408	9.89636	9.29607
Nckap5	0.0607783	0.918691	0.971059	0.102928	0.0721687	0.0833927	0.0950493
Dux	1.81814	0.162602		0.0677819	0.00884963	0.152513	0.112668
Akap17b	-0.122806	0.562279	0.803168	1.01994	0.847936	0.848112	0.887491
Clasp2	0.0526447	0.656184	0.858488	3.83404	3.52932	3.77159	3.94883
Sap25	-0.112422	0.431191	0.71668	14.3603	13.554	12.005	14.086
Jcad	-0.281251	0.270904	0.57139	0.634129	0.569695	0.555642	0.448426
Apol8	-0.636409	0.360316		0.208997	0.219625	0.140185	0.136874
Mfap1b	-0.114119	0.74911	0.906869	1.19015	1.11535	1.38733	0.765549
Rnf144a	0.297466	0.323636	0.626281	0.40127	0.52043	0.627831	0.519872
Mecp2	0.117005	0.45475	0.734407	1.07016	0.986971	1.22927	1.03046
Nfix	0.768626	0.0512089	0.215274	0.220318	0.17978	0.319219	0.377741
Tmsb15b1	0.0747776	0.832469	0.938737	4.58129	4.16632	5.52928	3.71666
Slc25a53	-0.166561	0.732023	0.898531	0.336127	0.298193	0.253179	0.308562
Sh3d19	-0.21836	0.0955926	0.315053	2.31165	2.24436	1.98975	1.95998
Ndor1	0.159034	0.0937427	0.311241	10.0969	9.57258	10.3835	11.8082
Efr3b	0.171442	0.490106	0.758528	0.502489	0.592917	0.630756	0.610239
Snx27	-0.0290694	0.771836	0.915704	5.50753	5.87133	5.7094	5.54112
Zfp266	-0.0607952	0.577418	0.811366	3.89094	3.90705	3.73802	3.80677
Pigyl	-0.0362028	0.813966	0.929641	17.4248	15.349	16.0929	16.2314
Mrtfa	-0.130837	0.363137	0.661189	3.45262	3.05617	2.88253	3.13479
Spint2	0.219553	0.00489321	0.0372575	66.5168	63.7429	73.5675	79.5757
Trim21	-0.791476	0.00100984	0.0102816	2.00729	1.85497	1.1503	1.09904
Itgam	0.692744	0.457825		0.0412843	0.0462008	0.0442343	0.0980336
Snrpn	-0.159602	0.0228033	0.121885	50.9487	51.03	46.5804	45.5925
Neurl2	0.101295	0.754882	0.909601	1.66642	1.95812	1.94917	1.9481
Sdr39u1	0.612262	2.29762e-05	0.000381839	8.38035	9.28185	12.7396	14.455
Tc2n	0.326943	0.67046		0.0572103	0.0712989	0.0780161	0.079801
Pja1	0.0434935	0.699548	0.882057	7.99035	8.10142	8.28429	8.44781
Pphln1	-0.0293161	0.78286	0.919498	6.97687	7.1745	7.26242	6.74092
Terf2	0.554824	4.8107e-08	1.41673e-06	10.5796	10.1886	14.9111	15.9151
Ptpru	-0.536989	0.0258784	0.133854	0.902288	0.844256	0.604674	0.612099
Enah	-0.0730742	0.272026	0.572531	18.9547	18.1145	17.2945	18.285
Lhx6	-1.03519	0.0217773	0.11806	0.43169	0.48386	0.244359	0.213499
Lig1	0.10745	0.10537	0.333356	73.0039	70.8519	75.6086	80.855
Gbp7	-1.59321	0.032451		0.112818	0.128083	0.0490525	0.0313592
St7	-0.195093	0.611955	0.834631	0.747942	0.707975	0.638884	0.6535
Pdgfra	0.629899	0.314308	0.616885	0.0921552	0.0546901	0.149232	0.0883744
Slc35a4	-0.192096	0.0249323	0.130116	18.4656	18.4735	16.3619	16.2865
Etv3	-0.0484121	0.782613	0.91945	1.56719	1.91019	1.80552	1.58739
Ubp1	-0.0646268	0.413223	0.701983	14.8228	15.2123	14.9312	14.05
Mtg2	-0.378481	0.00116932	0.0115747	15.0932	14.8978	11.4641	11.8282
Nup88	0.0327453	0.650052	0.856002	36.01	36.2339	38.2157	36.4025
Bin1	-0.484749	0.0335209	0.161917	3.32221	2.50044	1.96244	2.25721
Mboat2	-0.0964017	0.650756	0.856129	2.0441	1.94335	1.84152	1.92276
Disp3	0.0476143	0.95103		0.0506338	0.0351197	0.0395587	0.0505797
Tns3	-0.412957	2.22598e-07	5.80622e-06	12.6227	13.6494	9.56663	10.3385
Cacna1d	1.57765	0.167959		0.0121711	0.00993166	0.0342321	0.0272341
Ttll9	0.238016	0.676416	0.868874	0.206482	0.245076	0.199448	0.336018
Greb1l	0.0402713	0.87776	0.95791	0.363001	0.469666	0.425147	0.432783
Rusc1	-0.449946	0.0530989	0.220078	1.80897	1.54077	1.08725	1.39407
Prr5l	-0.114007	0.758924	0.911002	0.348807	0.509718	0.42802	0.355978
1600012H06Rik	0.199779	0.162755	0.4309	4.49763	4.75498	5.44391	5.26689
Pars2	-0.011566	0.939031	0.979554	3.5742	4.07226	3.69255	3.9539
Ndufv3	-0.319281	0.0159923	0.0942945	48.2774	59.2798	39.3313	47.4699
Liph	-0.373295	0.00160354	0.0149788	6.06177	5.79278	4.65954	4.59031
Mfsd14b	0.0490437	0.710518	0.888576	4.46057	5.07246	5.17284	4.75372
Slc12a8	0.962597	9.75307e-07	2.16816e-05	1.34955	1.43269	2.80425	2.64776
Sbsn	0.151776	0.840082		0.339974	0.764445	0.495808	0.748652
Fetub	0.0822387	0.817368	0.931289	1.46292	1.21056	1.30069	1.56756
Nr3c2	-0.0672119	0.930091		0.056048	0.0827213	0.0822465	0.0498537
Plekhg2	-0.493665	0.000643346	0.00710196	3.66533	3.37547	2.26362	2.79313
Kdf1	0.059412	0.797662	0.92448	2.28283	2.90045	2.52803	2.88951
Scn3b	0.496507	0.374211	0.670782	0.125801	0.164246	0.190361	0.215881
Zfp991	-0.294837	0.0353993	0.16794	6.27959	5.66346	4.60499	5.2401
Rbck1	0.0519549	0.532107	0.785294	23.9663	23.2218	24.1539	25.251
Wbp1	0.0210024	0.895391	0.963525	7.16469	8.27544	7.77938	7.98411
Oas1b	-1.73594	0.000140042	0.00191522	1.05132	1.1275	0.431805	0.220842
Tle3	-0.33453	9.31294e-05	0.00134173	10.488	10.441	8.28251	8.46861
Myom1	-0.527528	0.484834		0.0805077	0.0915484	0.0779126	0.0464888
Pth1r	-0.452315	0.0925592	0.308583	1.7599	1.65631	1.3837	1.13706
Slc35a2	-0.0812612	0.651714	0.856364	3.08768	3.24288	2.99803	3.04477
Rnaset2a	-0.00687468	0.984006	0.994941	2.69146	2.68172	3.64773	1.75692
Rsph3b	0.215885	0.731038		0.42744	0.24555	0.448823	0.338854
Zfp655	0.336064	0.222147	0.514542	1.47342	1.62377	1.93094	1.98524
Tcf4	0.0544177	0.735426	0.900718	1.7215	1.48246	1.86517	1.4962
Arid1b	-0.078296	0.575396	0.810011	1.25197	1.30672	1.14798	1.29678
Speg	-0.622354	0.0387554	0.179595	0.352418	0.290984	0.217655	0.208386
Mcc	-0.0616039	0.776893	0.917645	0.715621	0.619071	0.684581	0.612993
Myh7b	-0.410884	0.139412	0.392095	0.713993	0.576371	0.405432	0.573104
Anxa9	0.348601	0.410935	0.700425	0.730239	0.510408	0.737635	0.877118
1600014C10Rik	0.222208	0.447414	0.729479	0.835662	0.698698	0.998292	0.815853
Dusp5	0.0106622	0.948699	0.983455	4.83606	5.3936	4.984	5.39848
Entr1	0.139063	0.0896105	0.302957	26.4538	25.842	29.0315	29.1354
Steap3	-0.488467	0.00028547	0.00355546	5.38822	5.43396	3.8347	3.95053
Pramel24	1.93053	0.0137999		0.0847241	0.0850894	0.30143	0.341659
Zfp467	0.608764	0.277106	0.578053	0.159885	0.186774	0.278755	0.263613
Tspyl5	1.14273	0.0530031	0.219835	0.130071	0.080442	0.256727	0.218833
Smcr8	0.235995	0.0382535	0.178027	2.62477	2.70953	3.22535	3.11639
Ctnnd1	-0.344567	1.45484e-05	0.000252504	21.5044	20.5811	17.846	15.6413
Acin1	0.042498	0.533703	0.786328	67.4802	64.0828	67.1535	69.6709
Rere	0.00466585	0.960151	0.987969	5.11005	5.2073	5.08712	5.35919
Ndufaf6	-0.200882	0.256241	0.55451	7.83558	8.50843	6.65786	7.66145
Arfgef2	-0.120823	0.205243	0.49378	4.26517	4.43727	3.92855	4.14287
Slc25a43	-0.44428	0.369614	0.667612	0.876432	0.81113	0.596322	0.65252
Chmp6	-0.0321698	0.776501	0.917582	14.0748	14.313	14.3558	13.6443
Cisd3	0.503125	0.000867259	0.00906238	12.2975	12.8351	17.0954	18.8549
Zbtb34	0.0981778	0.518851	0.779086	2.00373	2.24972	2.00586	2.57798
Tmem8b	0.216559	0.620583	0.839376	0.218981	0.244522	0.298946	0.239471
Myom3	-0.918478	0.205514		0.148535	0.071107	0.0680804	0.0538111
Fam131c	0.107161	0.63822	0.848924	3.10912	3.02287	3.0714	3.58875
Myorg	-0.157599	0.563956	0.803572	0.854757	0.759721	0.801355	0.655751
Pramel19	0.534148	0.173839	0.448422	0.918571	0.803648	1.07722	1.41668
Syndig1	-0.222022	0.762108		0.334609	0.192221	0.108751	0.359387
Zfp992	-0.138013	0.293854	0.595359	4.67743	4.44534	4.00494	4.37253
Fthl17c	-1.01224	0.138747		0.702774	0.874869	0.4086	0.376154
Slc2a7	-0.143418	0.800497	0.925508	0.304165	0.356597	0.310381	0.277797
Tmem235	-0.0145086	0.990077		0.0831505	0.108562	0.179534	0.0193307
Pramel30	-0.0879062	0.934143		0.118209	0.10289	0.137914	0.0906876
Gm14393	-0.540452	0.445543		1.00922	0.744757	0.411379	0.785476
Trabd2b	0.542273	0.614044		0.0332016	0.0162556	0.0207516	0.0530658
Tcp11	-0.520349	0.015878	0.0937614	4.5207	3.8798	2.47973	3.43585
Mpzl3	0.157031	0.712255	0.889239	0.328582	0.350522	0.415747	0.353528
Ptchd1	-0.295907	0.753899		0.0528697	0.0303718	0.0343662	0.0378564
Srsf11	0.198546	0.00420486	0.0329884	51.6153	48.3143	57.7222	58.103
Dennd2d	0.33219	0.691225		0.0543599	0.0931514	0.110421	0.0695062
Ogfod1	0.52569	6.40599e-05	0.000959252	2.62677	2.58773	4.05634	3.52491
Trappc13	0.095431	0.349866	0.649856	11.1259	10.2266	12.4029	10.6508
Myadm	-0.494461	9.1639e-08	2.54287e-06	20.0291	19.9378	15.461	13.1848
C1s1	-0.14684	0.677773	0.869444	0.790728	0.686192	0.858223	0.514606
Kif26a	-0.656776	0.005751	0.0423865	0.757156	0.752437	0.447151	0.518365
Trerf1	-0.160908	0.270146	0.570673	2.26589	2.24845	1.77694	2.29928
Ccnyl1	-0.0458704	0.697907	0.881036	6.68903	7.04927	6.70215	6.72307
Hic1	0.324049	0.456371	0.735151	0.317904	0.33758	0.370898	0.44984
Bhlhb9	0.210881	0.106119	0.334446	5.13722	5.84009	6.62313	6.18148
Tead3	-0.985779	0.000136887	0.00188064	1.93718	1.99247	1.07702	0.93605
Sdcbp	-0.120567	0.673091	0.867429	6.69431	7.5851	7.9298	5.31782
Purg	0.972875	0.0339516	0.163283	0.382384	0.479272	0.994223	0.713834
Zbtb3	0.184301	0.404417	0.695041	2.32296	2.14084	2.57923	2.55088
Tmem176a	1.53284	0.00401126	0.0317699	0.382795	0.48193	1.2988	1.27608
Grsf1	0.078752	0.395829	0.688976	15.7183	15.536	17.2544	16.087
Yy2	0.0906309	0.657527	0.859497	2.10185	2.05657	2.51965	1.95287
Ndufa4l2	0.958311	0.174879		0.343523	0.280315	0.679906	0.585651
Tox2	-0.677789	0.745804		0.0853565	0.117997	0.119251	0
Ptrh2	0.151813	0.123812	0.366352	10.9046	10.3283	11.7686	12.0736
Atxn7l3	0.00616151	0.936418	0.978393	18.0577	18.0337	18.4732	18.1218
Pik3c2b	0.0288988	0.91325	0.969912	0.451633	0.378739	0.432102	0.426441
Zfp541	-0.254249	0.716492		0.118057	0.0924811	0.0922341	0.0867967
Arhgap44	0.0389139	0.870587	0.955082	0.987284	1.00703	1.01131	1.05198
Fam110d	-0.137464	0.615036	0.836127	3.0746	2.63707	2.27235	2.99868
Duox1	-0.548953	0.472372		0.086488	0.0889665	0.0655229	0.0536175
Scn2a	-0.380789	0.719615		0.0171598	0.0305509	0.0234004	0.0159572
Shisal2a	0.870523	0.339029		0.214734	0.300383	0.172558	0.823695
Ctag2l1	0.376303	0.559023		0.770352	0.660938	0.935452	0.984996
Msmp	-0.572466	0.160832	0.427395	2.43402	2.23179	1.97421	1.21163
Tmem35b	0.630616	0.286836	0.588078	0.362759	0.552556	0.589498	0.834902
Zkscan16	0.41713	0.538853		0.0505629	0.0710932	0.0632053	0.096977
Fthl17d	-2.11074	0.0508116		0.544734	0.515012	0.0704416	0.144106
Gm14305	0.255648	0.703674		0.305661	0.243877	0.318405	0.347402
R3hdml	0.252052	0.747321		0.428903	0.214109	0.378453	0.387112
Rapgef2	-0.0916128	0.69492	0.879915	0.742792	0.652007	0.713434	0.614391
Sh2d5	-0.240298	0.430126	0.715925	0.916197	0.82417	0.684974	0.812748
Rnf39	-0.372737	0.353558	0.652691	1.276	0.982168	0.987976	0.779242
Myof	-0.624646	1.09027e-06	2.39075e-05	3.06038	2.83077	1.9067	1.95281
Myh3	0.508401	0.131108	0.3784	0.308866	0.358116	0.354398	0.598283
Pnma8b	-0.317955	0.45528	0.734916	0.291187	0.414737	0.322631	0.245393
Cep170	-0.00106592	0.995573	0.999026	0.934928	0.917428	0.947854	0.923855
Htr3a	-0.0820372	0.936128		0.106814	0.0958767	0.133521	0.059752
Npw	-0.0223118	0.967418	0.990254	0.976765	1.1036	1.10358	0.912673
Rbis	-0.0382872	0.851349	0.947643	15.6563	13.869	14.7541	14.4258
Tomm5	-0.1415	0.0854424	0.293936	89.2817	91.8085	82.4765	83.226
Dnajc28	0.121353	0.8487		0.186403	0.131825	0.228155	0.11917
Pklr	0.879709	0.265035		0.113924	0.0743697	0.220086	0.145666
D3Ertd751e	0.195464	0.503119	0.768856	0.739485	0.763036	0.765347	0.981112
Trmt61a	-0.130404	0.230276	0.523299	12.854	13.6314	11.6315	12.7722
Smim24	0.0607445	0.944411		0.457879	0.534882	0.512115	0.554645
Srp54b	-0.126847	0.550719	0.796068	1.59445	1.95572	1.72562	1.5505
Srp54c	-0.109484	0.609497	0.833353	1.18679	1.47829	1.3031	1.17706
Fam177a2	-1.62963	0.102872		0.100142	0.0887202	0.0357658	0.0274381
Cyp2t4	-0.175954	0.874294		0.0730834	0.190836	0.0913566	0.14017
Zscan4d	1.03146	4.29334e-20	1.32119e-17	8.62368	8.68998	16.8646	18.8395
Taf4b	-0.158771	0.217404	0.509561	2.53067	2.40318	2.25104	2.21329
Msl2	-0.114449	0.288013	0.589025	5.29512	5.22715	4.97658	4.83556
Bicral	-0.301983	0.00139331	0.0133219	6.11894	6.23844	5.24196	4.8759
Wfikkn1	-0.0485413	0.927747	0.97495	0.352013	0.282825	0.264017	0.346227
Fam169a	-0.0919446	0.202197	0.48903	20.6183	21.7248	20.1203	19.9626
Zbtb42	0.339214	0.44166	0.725147	0.315769	0.273129	0.379919	0.373471
Pnma5	-0.650881	2.39991e-05	0.000397152	5.74198	6.33617	4.1219	3.64022
Tmem221	-0.760613	0.49781		0.161005	0.151818	0.145356	0.045748
Rc3h2	0.0294911	0.827196	0.935742	1.70847	1.91823	2.01295	1.7178
Adat3	0.0194118	0.914366	0.970232	5.74999	5.80219	5.28721	6.52968
Psmg4	-0.245869	0.387272	0.681746	25.2516	26.6422	17.8901	26.2515
Mkrn2os	-0.0876096	0.923823		0.129923	0.0918817	0.0744369	0.124593
Zcchc24	0.0819517	0.660082	0.860996	1.48467	1.46943	1.51165	1.64575
Prrt4	-1.09886	0.0841453		0.277788	0.199738	0.0905855	0.133839
Cyp4f17	0.144111	0.567286	0.804644	1.18501	1.18492	1.39313	1.25665
Mageb11	-0.526499	0.593816		0.193715	0.379373	0.224854	0.176922
S100a7l2	-0.534607	0.572415		0.592506	0.663067	0.529036	0.288608
Foxi3	-0.345144	0.323486	0.626094	1.8823	2.27881	2.12477	1.1815
Akap5	0.753908	0.121382	0.361939	0.110831	0.101827	0.19242	0.167955
Zfp267	0.275553	0.109789	0.340802	1.17877	1.14411	1.33366	1.50456
Pabpc4l	0.236786	0.678681	0.870058	0.0841566	0.199149	0.197247	0.134507
Gm4984	0.410195	0.442319	0.725563	1.03443	1.44479	2.01479	1.2919
Zfp703	0.269503	0.515632	0.777099	0.463282	0.322217	0.519582	0.442891
Clec2l	0.392918	0.479846	0.751996	0.395361	0.516185	0.530376	0.653478
Susd5	-0.045776	0.952872		0.0992872	0.0925927	0.106382	0.0816118
Ccdc8	0.2036	0.499178	0.766168	0.67593	0.684184	0.91139	0.670049
Rpl32l	0.118452	0.438703	0.723106	17.2044	20.4864	20.633	20.599
Cyp4f40	-0.886913	0.29225		0.21242	0.153265	0.139754	0.0500328
Isoc2a	0.394373	0.00198104	0.01783	14.7289	14.5014	18.1416	20.6528
Acp5	-0.0388459	0.887055	0.9605	2.10581	2.30179	2.15484	2.17909
Rbm8a	0.0399805	0.57053	0.806653	72.2366	65.591	72.7366	70.4343
Kng1	-0.485312	0.610298		0.155889	0.0939369	0.0824436	0.0919962
Stx16	0.218344	0.0342538	0.164327	7.3398	7.10521	8.29348	8.69094
Arfgef1	0.0534801	0.674308	0.867653	2.58109	2.50823	2.4945	2.83201
Acbd5	0.0583737	0.768765	0.914121	1.63643	1.6812	1.66234	1.81798
Aplp2	-0.144613	0.0372586	0.174404	34.389	33.2313	31.6488	30.1288
Azin1	-0.0433128	0.664733	0.862952	12.6154	13.553	14.3096	11.3354
Calml4	-1.34811	4.99212e-15	5.44718e-13	18.5587	17.5011	7.13999	7.18039
Cnnm2	-0.0081269	0.949396	0.983722	5.55653	5.00508	5.40817	5.20871
Prrt2	0.943887	0.0138707	0.0847026	0.402977	0.4973	0.938465	0.776418
Alkbh1	0.015409	0.881001	0.958927	14.5817	15.9741	15.462	15.6802
Col6a6	0.945249	0.401562		0.0174827	0.0202893	0.021854	0.0471916
Smyd4	0.271675	0.0536357	0.221698	3.32632	3.74508	4.47108	4.12304
Phldb3	-0.93174	0.0312635	0.153924	0.62356	0.84574	0.378384	0.410263
Kif19a	-0.813491	0.310428		0.180901	0.11022	0.0502515	0.113083
Nt5c3b	0.147455	0.249858	0.546122	11.9271	14.2275	14.1369	15.0372
Steap2	0.132967	0.424117	0.710615	0.843996	0.847234	1.00028	0.870454
Zfp980	-0.224011	0.0365486	0.171963	6.90261	6.86357	5.85704	6.04827
Pcbp2	-0.039106	0.487681	0.756919	181.155	180.994	181.568	174.29
Zglp1	0.0324171	0.903058	0.96616	3.26743	3.07007	3.2641	3.30381
Ablim1	-0.41438	0.326451	0.62946	0.173145	0.283223	0.164193	0.178129
Brwd1	-0.367333	0.0087256	0.0591673	1.9461	1.97303	1.56012	1.50469
Tulp4	-0.717667	0.000512912	0.00587521	0.825405	0.771777	0.498436	0.48405
Lin9	0.124152	0.52074	0.779731	1.876	2.02781	2.22508	2.06401
Cyp2c69	0.280739	0.66221		0.288433	0.264624	0.360551	0.328929
Med7	0.233112	0.0152833	0.0910339	12.7874	13.3202	15.6902	15.2853
Rdx	0.0729748	0.398992	0.691361	14.3116	14.5177	16.3543	14.2643
AW209491	0.0435075	0.78575	0.920332	5.04221	6.09379	6.10845	5.41631
Tfe3	-0.163098	0.0238043	0.125641	32.0966	32.3588	30.0479	28.0649
Pcdh19	-0.0287032	0.945891	0.982344	0.103982	0.163607	0.144978	0.115909
Tmc5	-1.2658	0.151527		0.146264	0.0907075	0.0274253	0.0701317
Zfp938	0.0696652	0.75022	0.907376	2.25491	2.50197	2.60709	2.43297
Gm11545	1.20697	0.0469754	0.203796	0.153153	0.146635	0.261643	0.437344
Dtymk	0.153429	0.0208876	0.114505	128.849	126.452	145.8	140.968
Kif21a	0.151322	0.617855	0.837714	0.436806	0.338263	0.473754	0.39972
Zfp185	0.0677902	0.67674	0.868943	2.65787	2.50254	2.77434	2.68898
Cdk12	-0.117777	0.205873	0.494556	5.85365	5.50676	5.5053	5.07912
Gas7	-0.268316	0.51987	0.779559	0.187627	0.214662	0.16442	0.170655
Bach2	-0.702272	0.271386		0.117959	0.0611809	0.0666564	0.0454542
Kazn	-0.438161	0.000149462	0.00203049	7.44552	7.03549	5.35274	5.44444
C2cd5	-0.238701	0.0214933	0.117006	7.1907	6.93039	6.17917	5.91117
Phf21a	0.25144	0.105027	0.332708	1.61144	1.48115	1.78874	1.93681
Cnbp	-0.000146716	0.997986	0.999454	171.933	178.695	180.098	173.78
Cenpw	0.305708	0.015173	0.0905551	10.291	9.94336	12.4092	12.8443
Tomm40	-0.141336	0.0468121	0.203506	138.796	136.71	119.426	132.678
Dgcr2	0.00308513	0.971478	0.991645	11.3334	11.5631	11.5145	11.6397
Dlg4	-0.370804	0.138907	0.391278	1.33169	1.3692	0.920764	1.19724
Atp7a	-0.0858555	0.707637	0.886829	0.570436	0.54543	0.526408	0.532016
Bcan	-0.0378933	0.955206		0.194791	0.174009	0.160194	0.203185
Capn3	0.188294	0.241693	0.536296	3.56519	3.32579	4.00171	3.94491
Cbfa2t3	-0.567332	0.284872	0.585522	0.102103	0.170726	0.082849	0.0984868
Trpc2	0.663611	0.120451	0.360142	0.284384	0.30134	0.422466	0.51118
Rnft2	0.653316	0.0530055	0.219835	0.344943	0.384251	0.597336	0.542214
Stau1	0.00792362	0.938984	0.979544	8.71588	8.02522	8.74295	8.28108
Srrt	-0.212827	0.0020192	0.0181021	90.7972	87.2859	74.1924	80.9185
Hnrnpm	0.00894561	0.891081	0.962052	127.817	129.922	125.601	136.122
Sec61g	0.303552	0.483618	0.754595	1.20625	1.62121	1.70743	1.79185
Mdfi	-0.454033	0.103773	0.330141	2.01982	2.34291	1.3781	1.84178
Synpo	-0.55344	0.375569		0.159338	0.148023	0.10725	0.101867
Nos1ap	-0.322009	0.744171		0.0686988	0.0358774	0.0480904	0.0351361
Nrep	-0.193258	0.357272	0.65662	2.60017	2.58925	2.29803	2.27815
Col18a1	-0.437883	1.64328e-12	1.14229e-10	46.1626	45.56	33.7874	34.5667
Ptpn11	-0.166765	0.0693487	0.261816	7.67553	8.40768	7.18678	7.25696
Eftud2	-0.052002	0.391497	0.686097	73.622	74.2346	71.3032	72.6584
Apoc1	-0.808635	0.000505489	0.00580962	15.6114	13.5322	9.57631	7.24365
Wdr36	-0.126363	0.0925327	0.30857	26.9065	27.9099	26.3113	24.3716
Dzip3	0.63519	5.79097e-06	0.000110051	1.97588	2.09854	2.94844	3.43545
Banp	0.503388	0.000163557	0.00220882	2.23986	2.2538	3.33858	3.09141
Lsm2	-0.0719585	0.451341	0.731897	64.6914	55.5798	58.9078	56.7733
Ppih	-0.336726	0.0780872	0.278289	3.67753	3.56417	2.6123	3.19364
Atp2a2	-0.16511	0.0103926	0.0678183	42.4193	45.0248	39.1751	39.5196
Cul4b	-0.227404	0.000483277	0.00558716	34.7808	35.4391	31.2289	29.3226
Ssb	-0.0670555	0.412841	0.701731	81.7243	76.6226	82.9909	69.7121
Prg4	-0.0524113	0.825461	0.93486	2.6398	2.50831	2.08989	2.91591
Tnk2	0.103778	0.22491	0.517634	21.5433	21.3817	21.4968	25.061
Mgat1	-0.171823	0.282036	0.582577	3.38123	3.53846	2.88675	3.30936
Nxt1	0.121219	0.226189	0.519354	27.5014	27.9585	29.7481	31.166
Lrrc61	0.323037	0.18325	0.461845	1.23446	1.43784	1.75442	1.61117
Cdca2	-0.234862	0.00391852	0.0311797	18.1385	18.1555	15.0441	16.0848
Inpp5d	0.0738256	0.348921	0.649249	13.1284	13.3797	14.5634	13.5998
Echdc1	-0.0887257	0.62379	0.84138	2.63231	3.32098	2.99876	2.6198
Rnf146	0.108735	0.409884	0.699564	3.96701	5.02665	5.08534	4.67222
Yif1b	0.0619218	0.497665	0.765166	39.5767	40.7547	40.3304	44.2453
Acvr1	0.185245	0.483425	0.754591	1.01495	1.04156	1.38881	0.987997
Akt2	0.0952615	0.309395	0.612085	8.03719	7.75735	8.50225	8.54189
Lnpk	0.348597	0.0274364	0.139635	0.964352	1.05876	1.32289	1.27308
Anxa6	-0.350413	6.12002e-06	0.000115676	35.9183	35.6556	27.2555	29.4086
Gigyf2	-0.181035	0.070334	0.264494	6.42507	6.98631	5.69553	6.23537
Dclre1c	-0.213564	0.545217	0.793029	0.497548	0.562341	0.436294	0.484257
Ppm1h	-0.227186	0.577416	0.811366	0.223698	0.230279	0.207034	0.184268
Celf2	0.211445	0.603408	0.829518	0.185252	0.145589	0.200096	0.195475
Bex3	-0.217245	0.00111129	0.0110858	224.273	216.319	186.424	196.225
Acp1	-0.00486513	0.979291	0.994174	2.14157	2.23568	2.25114	2.14989
Ndufaf8	-0.147864	0.420941	0.708153	17.0772	15.5231	13.8108	15.8836
Hmbs	-0.0250091	0.775004	0.917046	29.3526	29.2773	29.4502	28.7185
Hpn	-0.0147045	0.948077	0.983455	2.63869	2.43865	2.39044	2.70102
Fyco1	-0.125226	0.540378	0.790676	0.785394	0.806349	0.678313	0.794254
Zfp945	0.231413	0.177675	0.454103	1.20643	1.13651	1.38922	1.39399
Ttk	-0.033112	0.720807	0.893486	13.9622	14.5394	13.9907	14.1085
Abhd14a	-0.0976896	0.408586	0.698738	14.8133	14.6881	13.8252	14.0263
Itsn1	-0.0764162	0.509285	0.773359	4.8056	4.79042	4.24261	4.94131
Ap1m2	-0.549189	1.61959e-05	0.000277755	11.2321	12.0286	8.23751	7.80597
Keap1	-0.085372	0.488085	0.757164	5.42327	5.66974	5.54849	5.00502
Zfp426	0.436944	0.0597782	0.238256	1.03003	1.43412	1.61449	1.7286
Snx12	-0.00903396	0.933947	0.977519	9.87216	10.2936	9.96162	10.2547
Kif1a	-0.377903	0.0800606	0.282565	0.796564	0.701342	0.531335	0.635499
Zscan4f	1.05478	5.3887e-10	2.39587e-08	3.11403	3.1131	6.66638	6.38611
Cd72	0.108013	0.84766	0.94593	0.450336	0.45597	0.494004	0.458301
Dmtf1	0.0987143	0.359494	0.658583	7.37963	6.87549	7.81835	7.6076
Fiz1	0.0105497	0.896649	0.963861	30.6404	31.8739	30.0699	33.4773
Eci2	0.0884169	0.513678	0.775617	9.97873	10.4834	10.4372	11.5068
Gprc5c	-1.37073	9.6175e-12	5.7891e-10	2.54212	2.30888	0.872151	1.02018
Sin3a	-0.402341	2.99605e-08	9.21368e-07	20.9538	20.6614	15.6517	16.1442
Tmem87a	-0.0232744	0.821189	0.932915	9.54473	9.9508	9.85211	9.50355
Ifnar2	0.20924	0.434517	0.719719	3.77088	2.56195	4.27042	3.2043
Canx	-0.178031	0.00657594	0.0470731	57.4097	54.8913	51.9846	48.269
Capn1	-0.108289	0.267926	0.56812	11.3869	11.6472	10.4941	11.0704
Efcab12	-0.0450103	0.910434	0.969176	0.523658	0.690738	0.479132	0.68337
Mettl8	0.130359	0.398102	0.690383	5.43341	5.1439	5.33537	6.36289
Ebf4	0.0283679	0.976894		0.0724149	0.121558	0.0387947	0.158729
Samd11	0.0528136	0.815664	0.930666	10.528	9.95977	9.14702	12.302
Adam11	-0.300532	0.444009	0.726826	0.315939	0.334928	0.226158	0.300387
Syn1	0.156383	0.389675	0.684085	2.45172	2.31717	2.43009	2.9351
Ank1	-0.493746	0.675654		0.0316912	0.0130662	0.01251	0.021327
Xlr3a	-0.53478	0.192878	0.475906	0.980645	1.10525	0.880089	0.567999
Sf1	-0.0376406	0.550784	0.796089	61.6074	62.0996	59.125	62.5191
Anxa7	-0.105835	0.212895	0.504216	18.2298	19.3237	17.4552	17.7308
Pclo	0.395595	0.454104	0.733961	0.0463225	0.0445634	0.0406348	0.0779334
Capn12	0.148641	0.366433	0.664362	4.45832	3.40823	4.67476	4.18165
Gpatch4	0.0314365	0.720502	0.893471	40.8079	36.7415	38.7091	41.3846
Foxp4	-0.495921	9.15041e-09	3.07122e-07	16.1802	15.3108	11.0093	11.5588
Ddx6	-0.205743	0.008295	0.057024	12.8463	13.6765	11.9779	11.2258
Rbfox2	-0.116917	0.164932	0.434581	8.66904	8.26637	7.7016	8.07056
Dnpep	0.0261848	0.765863	0.91313	27.6833	27.9868	27.4233	29.7632
Nfya	-0.0879965	0.44079	0.724692	6.35754	6.62583	6.55233	5.77321
Cacna2d1	0.0909666	0.777964	0.918052	0.263875	0.330061	0.288332	0.349196
Crem	-0.172758	0.593414	0.823283	0.956804	1.0686	0.778144	1.02441
Nav2	-0.15225	0.163155	0.431697	2.63913	2.68664	2.26417	2.56906
Serac1	0.242493	0.125999	0.370025	1.58115	1.88887	2.07119	2.05921
Runx1	0.147812	0.780881	0.919009	0.135318	0.123981	0.151347	0.133561
Pigx	-0.130693	0.368361	0.666227	13.1924	12.6384	11.837	11.982
Runx1t1	-0.303191	0.465526	0.741398	0.180079	0.21307	0.159449	0.160699
Kctd9	-0.126997	0.471395	0.745573	3.72684	3.04995	3.60722	2.68345
Zfp661	-0.156066	0.514172	0.775918	1.48388	1.65227	1.5199	1.33258
Serpinh1	-0.102607	0.279873	0.580342	16.0491	16.5433	15.7786	14.8546
Cd151	-0.257437	0.0146396	0.0882179	20.1206	22.4087	19.293	16.5852
Cd34	0.745406	0.0678193	0.258336	0.483159	0.452541	1.05037	0.530487
Cd59a	0.0455392	0.920511	0.97204	0.53817	0.606385	0.663514	0.5373
Comt	0.195893	0.209784	0.499362	4.60033	4.41779	5.52085	4.92607
Reps1	-0.0431961	0.622762	0.840745	18.2467	17.8743	18.0809	17.3239
Fkbp8	0.626506	1.38359e-17	2.8279e-15	87.9351	93.6381	133.978	148.797
Fxyd5	-0.155143	0.646515	0.853381	1.88766	1.79803	1.89958	1.4421
Cdc25b	-0.140387	0.35649	0.655844	3.77987	4.20368	3.48395	3.81986
Uhrf1	-0.156117	0.010254	0.0671535	83.8513	86.997	79.4755	75.2933
Lyn	-0.0655652	0.879129	0.958257	0.410452	0.306965	0.353675	0.341385
Cdkn1a	0.934309	8.31392e-05	0.00121376	13.033	15.3255	31.6282	23.1058
Lipa	-0.251283	0.426204	0.71207	0.96023	0.823674	0.887192	0.640581
Uba3	-0.0249546	0.789209	0.921192	15.1203	16.6564	15.9941	15.4939
Zfp322a	0.0795975	0.621145	0.839854	1.90386	1.92076	2.15656	1.92748
Cmah	0.165018	0.889979		0.0183244	0.0147227	0.00881002	0.0270348
Atg16l2	-0.264912	0.38696	0.681487	1.73962	1.34438	0.991351	1.60282
Ccnb1ip1	0.212376	0.0931747	0.309881	10.1244	11.2757	12.5874	12.3851
Ccdc6	-0.235935	0.00763521	0.053427	9.18473	8.83096	7.94709	7.5041
Sprtn	0.654079	9.51775e-07	2.12101e-05	2.5803	2.80536	4.15032	4.38718
Lrrc73	-0.399753	0.512308		0.508231	0.455377	0.336338	0.395001
Ubap1l	0.334724	0.562571	0.803404	0.361621	0.510415	0.488689	0.587347
Ncoa7	-0.135283	0.627732	0.843795	1.24249	1.10752	0.960582	1.19949
Stau2	-0.201139	0.647866	0.854297	0.704603	0.371888	0.555951	0.396152
Igf1	-0.183047	0.869291		0.0155999	0.0432804	0.0292505	0.0199465
Eif2b3	0.0146296	0.865034	0.95281	33.1639	32.4713	32.602	34.3491
Wdfy1	0.0713456	0.606189	0.831552	3.08881	3.08179	3.51354	3.02585
Sco2	0.037687	0.724092	0.895126	21.018	22.4959	21.9037	23.109
Caprin1	-0.151646	0.017786	0.101887	51.1421	54.4338	49.8562	46.0729
Xlr5b	0.45684	0.664162		0.122104	0.207245	0.290004	0.124901
Tbc1d9	0.862129	5.49572e-09	1.92723e-07	1.40771	1.59512	2.70427	2.79323
Lrrfip1	-0.197498	0.334768	0.637002	1.66335	2.12265	1.8117	1.50749
Ngef	-0.419459	0.617153		0.0752692	0.184982	0.110693	0.0792577
Idh1	0.0135539	0.89229	0.962346	14.4781	14.9741	15.8744	14.1173
Nedd9	-0.53425	0.415809		0.131361	0.136425	0.0783707	0.11452
Kcnip3	0.215199	0.518217	0.778803	0.568604	0.846671	0.816507	0.817162
Ngf	-0.706658	0.29438		0.605711	0.53843	0.322195	0.379001
Cyth1	-0.351592	0.317754	0.620075	0.641048	0.664978	0.499459	0.527728
Cyth2	-0.313551	0.000287563	0.0035799	20.6667	21.4905	17.5642	16.6668
Abl1	0.298053	0.000382532	0.00456108	6.4543	6.81403	8.17838	8.26738
Tlk2	0.0380648	0.652897	0.85693	9.06864	9.21878	9.33838	9.61307
Ifitm1	-0.447928	4.15777e-06	8.12218e-05	116.653	107.853	75.4636	90.7543
Arhgef10l	0.292794	0.0339527	0.163283	2.94904	3.29617	3.61228	4.08596
[truncated: 13,052 more rows]

## Sheet: Supplementary Table 4b
Supplemental Table 4b. RNA-seq analysis of Lmna G609G/G609G and CBS_OE_Lmna G609G/G609G mESCs
SYMBOL	log2FoldChange	pvalue	padj	RPKM_G609G_homo_exp2_r1	RPKM_G609G_homo_exp2_r2	RPKM_G609G_homo_CBS OE_exp2_r1	RPKM_G609G_homo_CBS OE_exp2_r2
Zfp85	-0.0812498	0.836226	0.961069	0.699178	0.645964	0.590007	0.657329
Scap	0.0950251	0.332061	0.761983	8.10746	8.11348	9.00277	8.27584
Zfp458	0.0813526	0.918176		0.0935329	0.0956728	0.115456	0.0898672
Fbxo41	0.265731	0.696858		0.0515058	0.0842947	0.0836299	0.0791795
Taf9b	-0.229954	0.544611	0.873678	0.772483	0.606241	0.558659	0.614241
Zfp941	0.177525	0.361249	0.784541	1.80456	1.49105	1.93674	1.78868
BC031181	-0.0487245	0.664541	0.911806	25.3472	23.2772	22.2908	24.6369
Baz2b	0.0943108	0.615785	0.899803	0.817992	0.900729	0.905307	0.929019
Tmem204	0.881612	0.349694		0.0386497	0.19767	0.174321	0.250661
Primpol	-0.0876847	0.422007	0.816881	7.41675	6.74146	6.60932	6.68177
Zfp456	0.103241	0.736745	0.931862	0.749109	0.529486	0.626386	0.752099
Zfp738	0.448369	0.112712	0.509893	0.621166	0.510641	0.818145	0.735958
Dis3l	0.164941	0.1173	0.518568	7.42815	7.25295	8.07898	8.34119
Thnsl1	0.112469	0.607336	0.896945	2.22938	1.9557	2.25075	2.26968
Itga8	-0.0580579	0.907759	0.979036	0.251206	0.117896	0.146625	0.207287
Slc35d2	0.00550005	0.98408	0.996799	1.35644	1.36422	1.44916	1.28143
Dennd2b	-0.161584	0.28363	0.720949	2.81434	2.80831	2.54234	2.47838
Vkorc1l1	0.142723	0.141578	0.55552	6.79224	6.66302	7.46564	7.34865
Hexd	-0.149294	0.487365	0.850754	2.50125	2.58299	2.29231	2.28037
Plekha8	0.100459	0.447542	0.830176	2.67579	2.34184	2.57041	2.79513
Cyp2c23	0.0359658	0.974728		0.105322	0.0628434	0.0633374	0.11806
Zscan22	0.0493517	0.735287	0.931721	3.65579	3.35486	3.61901	3.62183
Ttyh1	-0.204109	0.288083	0.723814	2.34003	2.75055	2.10567	2.29779
Tpm4	0.00714543	0.938328	0.986368	18.8397	18.7335	19.0521	18.598
Lca5l	-0.748536	0.413285		0.0814435	0.133291	0.0783643	0.0521677
Wdr83os	-0.0354209	0.756303	0.937107	37.2999	42.758	37.6627	40.2584
Usp17ld	-2.75906	9.63993e-06	0.000782068	0.901613	0.80428	0.16077	0.10073
Chpf	-0.0656343	0.568649	0.882834	6.89787	7.41418	6.7827	6.86223
Dab2ip	0.0553762	0.579339	0.888315	4.8752	4.99224	5.22924	5.00174
Prss48	0.743447	0.462866		0.101771	0.193327	0.157377	0.335254
Nsd3	-0.00239977	0.987926	0.997147	2.72657	2.8323	2.75262	2.78712
Zfp950	-0.195278	0.804914		0.0839737	0.082316	0.107311	0.0437031
Itprip	-0.337414	0.363649	0.785787	0.556002	0.499366	0.505622	0.330082
Zfp239	0.0907386	0.60601	0.896945	2.67135	2.52227	2.70834	2.80796
Atp11c	0.297493	0.236761	0.673132	0.55387	0.687523	0.689582	0.831505
Ephx4	-2.31489	0.0353858		0.439164	0.19653	0.0742782	0.0659301
Zfp36l2	0.271781	0.0398209	0.310669	4.73093	4.2231	5.74412	5.03087
Mpzl1	-0.178114	0.089352	0.461754	13.0985	13.3122	11.5329	11.7628
2510009E07Rik	1.01847	0.315082		0.0232535	0.0339793	0.0839037	0.0414925
Rtel1	0.118678	0.169389	0.594793	17.7251	20.1695	19.9046	21.13
Hecw2	-0.520266	0.423258		0.0645791	0.048756	0.0429969	0.0369334
Nckap5l	-0.0567678	0.689133	0.920927	2.69922	2.82258	2.68409	2.61045
Tmem151a	0.520349	0.0101876	0.149969	1.21694	1.27579	1.82828	1.72683
H2-K1	-0.948292	1.53332e-14	5.97095e-12	15.5905	16.1937	8.63844	7.79173
Eea1	0.0773223	0.766468	0.940341	0.423862	0.442545	0.459608	0.445231
Megf10	-0.534369	0.634601		0.0274734	0.0304438	0.0206521	0.0175978
Limch1	-1.17084	0.0124972	0.170587	0.265666	0.239945	0.135119	0.0923261
Utp14b	-0.101751	0.662265	0.911137	1.21242	1.24966	1.19424	1.09796
Ccdc9b	0.00272143	0.996323	0.999636	0.138499	0.167765	0.20384	0.0945508
Pi4ka	-0.156044	0.128277	0.537574	5.02348	5.17142	4.44655	4.67932
Kdm2a	0.0774943	0.418618	0.814964	6.06401	5.58054	6.46289	5.78542
Nat8l	0.365097	0.238219	0.675811	0.367836	0.301001	0.452681	0.406432
Nol4l	0.594617	0.044765	0.330154	0.428146	0.350353	0.584834	0.584728
Gp1bb	-0.8241	0.342999		0.156427	0.218956	0.0742663	0.142386
Bltp2	0.219317	0.00300095	0.0698572	17.2616	16.934	21	18.7077
Zfp948	0.0738634	0.601901	0.895773	4.97439	5.07508	5.00759	5.54932
Lmna	-0.0466586	0.699883	0.923032	6.29973	6.82128	6.56375	6.09976
Hspa2	-0.206314	0.504657	0.856735	1.06196	1.16982	1.13603	0.797959
Tdrd1	0.278674	0.513788	0.861092	0.32269	0.211677	0.246788	0.404404
Rpl17	-0.105815	0.550889	0.877469	10.7412	10.758	9.60839	10.3417
Tmem158	-0.477891	0.333031	0.762544	0.822378	0.506743	0.482637	0.475993
Adgrg6	-0.114639	0.89163		0.0582132	0.0460121	0.0501246	0.0457623
Tro	-0.216469	0.0705917	0.412931	2.9423	2.88767	2.52076	2.48335
Smg6	-0.117426	0.247143	0.686177	6.26379	7.04841	6.29588	5.94726
Pram1	-0.156659	0.789284	0.945556	0.310144	0.309502	0.307061	0.247113
Fbxl12	-0.0768773	0.685717	0.91965	3.29385	3.48655	3.07471	3.33008
Nlrp14	-0.50081	0.163007	0.586125	0.655443	0.654348	0.411507	0.508842
Smim29	-0.232229	0.406909	0.809565	4.73422	6.98549	4.95774	5.01923
Atg9b	0.269517	0.302867	0.738272	0.833678	0.96555	1.24542	0.919673
Penk	-0.844723	0.00502859	0.0977293	2.43482	2.34109	1.29584	1.35685
Nup85	0.0206691	0.775324	0.943465	57.3402	59.2754	57.2855	60.7086
Pcdhac1	-1.27114	0.190668		0.077767	0.0696029	0.0467667	0.0124532
Pcdhac2	-1.45437	0.12121		0.0840105	0.0675184	0.043304	0.0115311
Osbpl8	-0.119067	0.567554	0.882158	0.788154	0.897685	0.806916	0.74565
Ralgapa1	0.177205	0.24502	0.683834	1.29778	1.26966	1.4048	1.48825
Erbb2	0.093042	0.595806	0.893361	1.60062	1.55609	1.73635	1.62075
Kcnq2	0.225689	0.606637	0.896945	0.451528	0.352167	0.35639	0.574827
Masp2	0.131445	0.407187	0.809652	3.10071	3.26951	3.462	3.50366
Tardbp	0.154189	0.0137345	0.178566	33.1115	33.9015	37.1895	37.1792
Cltc	0.0323074	0.65937	0.910732	19.256	17.8145	18.4741	19.3243
Ankib1	0.0314479	0.868353	0.971214	1.08495	1.37527	1.15194	1.35416
Ttc41	-0.411622	0.395471	0.803879	0.216877	0.310574	0.209863	0.185645
Adamts7	-0.294743	0.459986	0.836685	0.289982	0.319686	0.223796	0.275521
Arhgef11	0.0725035	0.568897	0.883119	2.44583	2.4992	2.68461	2.50599
Mars1	0.116805	0.0874858	0.459229	49.7128	51.0606	53.4179	55.553
Zc4h2	0.315397	0.213143	0.64772	1.69324	1.64498	2.42709	1.73088
Atg9a	-0.0314063	0.84706	0.964253	2.48319	2.52629	2.50184	2.38158
Usp7	-0.0235906	0.710485	0.925712	43.6536	42.6533	41.5566	43.1091
Ddx11	0.018782	0.850879	0.965594	8.17392	8.5606	8.17884	8.73151
Brsk1	0.0230564	0.85403	0.966938	5.83087	5.77568	5.89384	5.86807
Rtn3	-0.180117	0.0258772	0.250938	14.3653	13.7381	12.1371	12.603
Pid1	-0.0707427	0.815038	0.95373	1.30716	0.862834	1.04553	1.02701
Tmem259	-0.118456	0.510157	0.859039	39.5688	50.0846	40.5631	41.8275
Rab3ip	-0.0921132	0.380205	0.795458	11.6535	10.5836	10.2651	10.5511
Kdm2b	0.2178	0.0174643	0.203628	7.46093	7.67252	9.00562	8.55484
Rab11fip5	-0.498323	0.0597946	0.381623	0.686654	0.696631	0.561252	0.414696
Dnmt3b	-0.288997	2.85027e-05	0.00194239	34.994	33.1929	27.5942	28.0589
Senp7	-0.559567	0.324181	0.755868	0.673302	0.789142	0.341637	0.660391
Crtc1	-0.108792	0.411249	0.812029	3.15678	3.60396	3.34769	2.91372
Zfp386	0.089732	0.727917	0.930122	0.72262	0.956771	0.989346	0.789457
Zfp619	0.111824	0.689043	0.920891	0.448811	0.615049	0.615064	0.533498
Ckap2	-0.0560398	0.515066	0.861423	29.0142	25.3387	25.862	26.281
Usp22	-0.0618462	0.43695	0.824194	19.2785	18.6898	19.0947	17.1836
Git1	0.154319	0.0394432	0.308872	21.8044	21.6943	24.6978	23.5782
Nlrp4g	-1.18715	0.271976		0.171483	0.0730859	0.0386717	0.0686509
Slc13a5	-0.58129	0.293551	0.729524	0.21591	0.414766	0.171011	0.247926
A4galt	-0.545644	0.00370144	0.0806535	4.51613	3.8982	2.86983	2.87125
AU018091	-0.326641	0.000282173	0.0123265	22.7966	22.6902	16.7455	19.4237
Rragb	0.323441	0.00797873	0.130862	8.78974	7.93173	9.9332	10.9433
9930012K11Rik	0.45703	0.0772694	0.431111	1.78608	1.39238	2.18208	2.14926
Scarf1	-1.04864	0.0157828	0.193446	0.53734	0.65956	0.306983	0.27535
Gnptab	0.279553	0.0249811	0.247615	3.32897	3.04913	3.75001	3.96639
Sgpp2	0.232682	0.751539		0.0944888	0.0966506	0.104606	0.111419
AA467197	-0.572461	0.535253		0.487426	0.553975	0.488539	0.234161
Celsr2	-0.0488746	0.766076	0.940298	0.946453	0.879182	0.874468	0.884144
Frg2f1	-0.306101	0.652725		0.379709	0.231188	0.285432	0.1911
Fam222a	-0.217668	0.328892	0.760178	2.13627	2.03512	2.02482	1.55626
Slc28a1	0.0185049	0.851703	0.965915	13.1561	13.3392	12.7156	14.045
Whamm	-0.139293	0.460411	0.836765	2.31576	2.51787	2.29127	2.09571
Rexo5	0.127702	0.67258	0.914641	1.27007	1.60656	1.47801	1.67674
Zfp560	-0.317735	0.278951	0.718094	0.598833	0.723903	0.566371	0.495161
Gm5617	0.0381129	0.884507	0.975239	5.6593	5.06518	5.6204	5.38521
Amigo1	0.498387	0.202153	0.635782	0.207041	0.246547	0.3345	0.305813
Cntnap2	-1.18234	0.0217559	0.229955	0.182274	0.181405	0.0933201	0.0686321
Gprasp1	0.133874	0.170836	0.597196	5.5159	5.51159	6.0409	6.03239
Tpgs2	0.104317	0.42129	0.816477	3.8992	4.33314	4.39085	4.435
2610008E11Rik	-0.0921551	0.795252	0.947419	0.670051	0.382152	0.53116	0.448703
Nuak1	0.724689	0.0278065	0.259548	0.310826	0.296118	0.569011	0.430399
Asap2	-0.0158672	0.940787	0.986707	1.04603	0.942582	0.918299	1.04392
Actr3b	-0.294053	0.0938037	0.471716	4.93012	4.28314	3.50478	3.97617
Scube3	-0.708163	0.000617125	0.0230126	1.12733	1.10585	0.748211	0.609427
Wapl	0.240536	0.00272188	0.0658222	11.7713	12.8855	14.3557	14.7027
Tacc2	-0.106448	0.28812	0.723814	3.85991	4.08692	3.5539	3.81037
Pigu	-0.0163508	0.905401	0.978845	9.68522	8.77211	8.81358	9.37738
Pla2g4c	-0.283364	0.56103	0.880231	0.383071	0.318692	0.377802	0.201205
Znhit3	0.037228	0.756144	0.937107	25.7031	22.1864	23.2948	25.7095
Hps5	-0.0624382	0.698677	0.922734	2.13995	2.02392	2.03383	1.94588
Ypel2	0.0173096	0.953654	0.98927	0.563784	0.558773	0.644392	0.484491
Zfp960	0.197994	0.296945	0.73265	2.44232	2.33428	2.84496	2.61144
Spin2c	-0.0334131	0.939619	0.986642	0.82941	1.00998	0.807552	1.02459
Ado	0.204847	0.0491868	0.346009	6.05844	5.84575	6.98969	6.68488
Ppp1r26	0.408956	0.078803	0.436311	0.705105	0.680293	0.972119	0.857932
Mreg	-0.273484	0.000744729	0.026433	31.5105	29.9251	24.6301	26.0621
Ajm1	0.397473	0.586615		0.0805608	0.0749126	0.105702	0.0985135
Zcwpw1	-0.406432	0.000688239	0.0250812	13.8595	16.736	12.2489	10.7848
Iqsec2	0.121794	0.797752	0.948154	0.174977	0.202619	0.193576	0.212528
Txlna	0.193635	0.0138161	0.179104	15.8912	15.9433	19.03	17.279
Smg7	0.125777	0.0949836	0.472942	14.2134	14.3897	16.036	15.0929
Arhgap30	0.186138	0.403813	0.807993	1.08449	0.983872	1.26519	1.08617
Eif2a	0.0817645	0.266015	0.706966	43.3371	40.8803	43.9011	44.9859
Syne2	0.263739	0.214293	0.648896	0.222993	0.251635	0.30495	0.26229
Lmtk3	-0.41141	0.0463751	0.336028	1.37848	1.8031	1.29753	1.09073
Rsrc2	0.121308	0.191989	0.622434	36.2229	29.7596	35.3831	36.1504
Aebp2	-0.0760022	0.403396	0.807583	7.82641	7.63383	7.00159	7.6257
Itgb4	-0.598934	0.0428226	0.32237	0.495911	0.739391	0.437229	0.374181
Phactr1	0.0613641	0.940463		0.0844391	0.0564733	0.108394	0.0374445
Parl	0.154569	0.0540065	0.360918	46.3072	47.8218	52.1467	52.3625
Patj	-0.265668	0.336261	0.764577	1.06582	0.968486	0.896092	0.790409
Zfp69	0.0665399	0.833799	0.960346	1.20046	0.86327	1.1682	0.985644
Aga	-0.237795	0.228861	0.663214	7.08965	5.38748	5.6578	4.86741
Rpl34	-0.124695	0.598512	0.894131	9.68386	8.85703	8.00211	8.89684
Mtus1	0.100138	0.469429	0.842015	2.34005	2.93295	2.87994	2.75749
Zmiz2	-0.105688	0.212803	0.64772	23.3818	26.7231	23.9908	22.4654
Erbin	0.081943	0.644531	0.908028	1.29172	1.11251	1.24444	1.28826
Zbtb9	0.0508083	0.745234	0.933594	4.47026	4.14997	4.93346	3.95738
Epb41l1	-0.170846	0.114717	0.514658	4.09077	4.15738	3.67582	3.63395
Phactr3	0.23564	0.797516		0.0814834	0.0303082	0.0601384	0.067614
Adam22	-0.470772	0.280123	0.718534	0.564292	0.453073	0.350295	0.378941
Zdhhc23	-0.0514855	0.869694	0.971558	0.383385	0.452028	0.438233	0.371172
Rffl	-0.150238	0.256596	0.696947	5.17728	4.60608	4.32836	4.4637
Slc7a6os	-0.0978109	0.255296	0.695146	38.3587	40.9919	38.1769	35.7704
Zfp251	0.357946	0.0747496	0.423706	1.51908	1.67915	2.21458	1.88329
Pnma8a	0.36198	0.590181		0.0923146	0.133056	0.189256	0.104823
Slc25a42	-0.213784	0.368592	0.789166	1.35524	1.55815	1.2763	1.224
D8Ertd738e	-0.133515	0.082056	0.445393	126.782	132.703	119.997	115.888
Maneal	0.160444	0.486008	0.850306	1.84577	1.59804	2.15369	1.67659
Zfp58	0.0351405	0.899734	0.978378	1.53709	1.28165	1.68882	1.21088
Tceanc	0.0466036	0.883299	0.975049	0.589757	0.538151	0.623848	0.542184
Armcx6	-0.127647	0.758532	0.937846	0.684631	0.821333	0.861555	0.527864
Pramel20	-5.20772	0.00138557		0.269746	0.301001	0.014747	0.00785376
Fndc3c1	0.138435	0.757501	0.93747	0.229361	0.219945	0.252155	0.241032
Trp53rka	0.379585	0.00843111	0.135749	6.08768	6.13289	8.35326	7.49249
Akirin2	0.160258	0.0906491	0.464557	26.4426	24.1493	26.9776	29.3793
Rtn1	-0.123005	0.704897	0.923536	1.5118	1.52365	1.25342	1.53799
Daam2	0.107196	0.916953		0.0199415	0.0437094	0.0334069	0.0437942
Asap3	0.32135	0.0292613	0.266586	2.11063	2.26307	2.96719	2.48152
Plekhn1	-0.51865	0.164139	0.587258	0.781986	1.12783	0.663071	0.668691
Bnip2	0.102272	0.391343	0.802651	3.47109	3.25514	3.58226	3.61822
Nol10	-0.0296324	0.700816	0.923338	25.1824	25.0839	25.1007	24.012
Scaf1	-0.066538	0.445589	0.828919	24.9954	29.2474	26.9067	24.7792
Ccdc177	0.397014	0.72904		0.0117004	0.0558513	0.0527722	0.0374729
Cdsn	-0.293164	0.358632	0.781951	0.980776	1.30483	1.14492	0.708293
Thoc6	-0.0382114	0.666434	0.912516	29.6596	29.6018	28.8547	28.6809
Zfp975	0.0992779	0.564831	0.881331	2.69759	2.59173	2.98999	2.65482
Dync2i2	-0.108656	0.302399	0.737699	15.8668	16.0338	15.1165	14.398
Zfp760	0.0221253	0.901876	0.97856	1.79123	1.81969	1.81454	1.8504
Bbs12	0.409939	0.105498	0.49544	1.40374	1.24826	1.83256	1.67404
Zc3h14	0.2088	0.0163461	0.195859	16.4601	16.1177	18.0573	19.4847
Mxi1	0.136964	0.492638	0.852693	3.38132	2.50571	2.85032	3.61812
Pde2a	-0.550493	0.0851097	0.452772	0.632272	0.684534	0.485163	0.414199
Zfp658	-0.331467	0.442957	0.827549	0.355625	0.478087	0.34829	0.317281
Zfyve26	-0.0203992	0.877045	0.974373	1.95421	2.42578	2.17241	2.13727
Il4ra	-0.840576	0.0525723	0.357106	0.360193	0.371877	0.279365	0.129374
Dab2	-0.141597	0.699445	0.92293	0.563345	0.418234	0.450794	0.436505
Bud31	-0.0076593	0.932298	0.984793	62.9694	66.6169	63.2819	65.2851
Kbtbd8	0.22933	0.140219	0.553291	2.65133	2.14065	2.92494	2.67984
Whrn	-0.0644732	0.801238	0.949123	0.891979	1.00707	1.00577	0.80851
Naaladl1	-0.217418	0.382232	0.796922	1.54778	1.67516	1.53522	1.23412
Unc13d	-0.691348	0.135643	0.547407	0.305158	0.401322	0.251674	0.184296
Armcx5	0.153161	0.377321	0.793855	3.36983	2.75008	3.29217	3.49491
Septin11	0.118773	0.0961111	0.475566	22.928	21.2414	24.0094	23.8157
Mief2	0.0181331	0.908567	0.979036	4.05365	4.49483	4.55387	4.08461
Brsk2	-0.429501	0.536141		0.133167	0.127701	0.105109	0.0879645
Txnip	0.113224	0.152379	0.57182	57.0552	52.7318	63.5719	54.8663
Dock11	0.228067	0.299408	0.734842	0.752032	0.684356	0.7813	0.896969
Nrsn2	-0.0722747	0.786556	0.94507	2.31048	2.43759	2.23695	2.26642
Slc25a51	0.0290967	0.815323	0.953935	4.38971	4.28442	4.7238	4.1099
Slc38a8	0.212855	0.621565	0.900709	0.37449	0.551066	0.557091	0.498688
Cep44	-0.0477238	0.673822	0.915091	19.2683	17.6725	17.0576	18.5845
Slc10a7	-0.0889192	0.458863	0.836685	5.90057	5.53631	5.37495	5.3443
Ficd	-0.110539	0.712891	0.926292	0.939612	0.822221	0.901475	0.720142
Mdc1	0.0395193	0.623899	0.902073	8.97724	8.64473	9.3018	8.76015
Ppp1r13l	-0.187853	0.270671	0.711841	3.41722	3.59672	3.47466	2.65942
Mrps33	-0.176309	0.659303	0.910732	1.82274	1.48779	1.32866	1.60979
Xkr7	1.12528	0.206096		0.0506759	0.0907118	0.131423	0.164328
Trex1	-0.0291163	0.884149	0.975239	5.84357	6.27613	6.39868	5.45859
Birc5	-0.0800748	0.304423	0.739395	31.252	33.2881	29.3062	31.5916
Nsrp1	0.388083	0.000220206	0.0100546	8.86021	7.91736	11.0679	10.8347
Slc25a47	-0.0842417	0.831818	0.959669	0.905034	0.992662	0.914751	0.880041
Pgbd1	0.178804	0.635482	0.905659	0.523436	0.450872	0.571571	0.524097
Zfp708	-0.171975	0.534662	0.869354	1.39458	1.21182	1.25188	1.06673
Zbtb18	-0.174189	0.495944	0.853819	1.33678	0.942061	1.08486	0.936442
Mdk	-0.080628	0.306632	0.742118	180.189	205.669	178.641	185.304
Hacd1	0.283316	0.456445	0.835441	1.67897	1.71739	1.74347	2.36348
AU022252	-0.0398963	0.792729	0.946705	5.9994	6.38175	6.20153	5.80854
Hspb6	0.219641	0.476568	0.846635	1.88876	1.58792	2.13554	1.90174
Hs3st6	0.245035	0.771097		0.236718	0.256377	0.364261	0.214061
Ankrd6	0.0174466	0.926468	0.983625	1.41085	1.61794	1.48587	1.57916
Cxcl12	-1.21372	0.019116	0.21442	0.248159	0.201212	0.0873573	0.107586
Fut10	0.549985	0.0515289	0.352547	0.672945	0.82407	1.26537	0.91977
Ehmt1	0.120334	0.173438	0.600806	9.39083	8.92203	9.71643	10.132
Rims1	-0.120969	0.845343	0.964051	0.121148	0.076461	0.109282	0.066868
Acd	-0.157088	0.124502	0.531321	21.3241	19.9443	18.5467	18.3619
Smim19	-0.094449	0.611574	0.898362	5.31234	4.90256	4.65358	4.91131
Adcy5	-0.853899	0.181626	0.610638	0.178681	0.0675995	0.083902	0.0517386
Zfp787	0.00140961	0.995931	0.999589	1.82488	1.56945	1.85088	1.51783
Lrrn4cl	0.0492251	0.913553	0.980418	0.442394	0.398484	0.500319	0.380647
Mterf1a	-0.148599	0.571514	0.88396	2.62364	2.9137	2.8062	2.18471
Usp13	-0.0425803	0.852496	0.966245	0.955757	1.04155	0.941728	0.99247
Tgfbrap1	-0.0589085	0.784978	0.94507	0.946161	1.3092	1.1297	1.0297
Ttf2	0.198175	0.0328814	0.280976	8.81728	8.23475	10.0012	9.51473
Tmem263	0.349608	0.0199711	0.219159	3.01662	2.63487	3.7252	3.46585
Ctc1	-0.15102	0.0494197	0.34716	21.5692	23.0617	20.1995	19.8889
Npcd	0.190493	0.451668	0.832962	0.772326	0.912714	1.09237	0.821306
Osm	0.618501	0.347789		0.198268	0.239677	0.341438	0.329041
Wdr91	-0.381132	0.0105093	0.153358	5.70499	5.5076	3.94228	4.65165
Prkaa1	0.0828439	0.496767	0.853819	3.98262	3.85476	4.12193	4.1528
E2f8	0.323479	0.00129747	0.0398733	7.74988	7.39776	9.44728	9.46226
Pfdn4	-0.0578208	0.624026	0.902073	28.5264	30.9043	26.9496	29.9811
Sesn1	0.226999	0.234491	0.670723	2.96673	2.36025	2.94377	3.27487
Dtx3l	0.368618	0.0565345	0.369792	1.62996	1.16572	1.92456	1.67431
Nrp	-0.123024	0.446295	0.829243	8.90105	8.71407	8.47972	7.649
Tmprss13	-0.114008	0.87765		0.074319	0.249778	0.105348	0.193817
Lman2l	-0.182754	0.254116	0.693876	4.70676	4.58035	4.13565	4.03121
Utp18	0.19665	0.0161583	0.195847	22.56	21.3681	24.9885	25.2209
Rpp38	-0.0723793	0.643245	0.908028	10.4053	10.7462	9.80938	10.2712
Arhgef39	-0.120686	0.449569	0.831857	5.21125	4.55954	4.15694	4.80701
Uspl1	0.0816847	0.260131	0.700891	27.6741	27.5184	29.5045	28.7516
Zfp930	0.170669	0.189698	0.619186	6.78193	5.54733	7.15194	6.68688
Dync1li2	0.0828737	0.413734	0.812533	6.69982	6.67086	7.35277	6.76178
Rsad1	-0.0730428	0.867185	0.970744	0.281545	0.368453	0.242765	0.381898
Podnl1	-0.703309	0.543148		0.0828875	0.118697	0.0598153	0.0716751
Grm4	1.42405	0.0163294	0.195859	0.123472	0.104332	0.334136	0.314635
Rasl10b	0.157195	0.626737	0.902986	0.542441	0.76166	0.787347	0.672798
Zfp182	-0.08316	0.75097	0.935034	0.562385	0.711651	0.564831	0.635043
Mrs2	-0.0205532	0.933332	0.984801	1.71571	2.14677	1.95798	1.85548
Cpsf6	0.223401	0.0032847	0.0746229	11.2645	11.0114	12.8425	13.0957
Tcaim	0.174625	0.514242	0.861409	1.16691	0.973429	1.10883	1.30623
Neurl4	0.0987741	0.224018	0.657993	11.9883	12.6242	13.4424	12.849
Ric8b	0.317837	0.0302017	0.270812	3.04432	2.3881	3.42467	3.32728
Inip	0.05129	0.640096	0.906943	8.45572	7.9061	8.13346	8.79152
Pard3	0.0428389	0.798815	0.94859	2.44697	2.24678	2.19249	2.6351
Ercc6l2	0.0706154	0.551677	0.877516	3.89682	3.79275	3.80647	4.25053
Trim6	-0.131943	0.0592178	0.379815	37.6818	35.8291	32.7798	34.1252
Zfp57	0.182618	0.0139704	0.180654	134.79	146.397	151.579	166.682
Tmem151b	0.83764	0.00633439	0.112856	0.367866	0.45588	0.83916	0.628731
Syna	-0.109711	0.88255		0.129367	0.168416	0.111392	0.169496
Pcdh17	0.812449	0.446898		0.0324677	0.00369006	0.0390502	0.024263
5730409E04Rik	-0.092846	0.765852	0.940207	0.921502	0.844014	0.760617	0.885386
Grhl3	-0.0313563	0.812	0.953079	6.36688	5.71587	5.70425	6.08766
Lingo3	0.447774	0.315893	0.748184	0.389231	0.22459	0.436634	0.397949
Zscan4c	-2.7581	5.78686e-78	5.25813e-74	13.7809	14.6909	1.84593	2.34344
Capn11	-0.114569	0.832658	0.959859	0.315811	0.30929	0.278817	0.296978
Rsl1	0.285536	0.440359	0.826783	1.03402	0.610527	0.985823	1.03388
Lipo3	-0.227908	0.320574	0.752218	2.35698	1.71676	1.59596	1.85709
Gm973	0.307034	0.627641		0.177504	0.122679	0.151463	0.202813
Tvp23a	0.0385168	0.725608	0.929	7.24763	7.35507	7.52989	7.42716
Aim2	0.463678	0.000130719	0.00672316	6.68409	6.24702	8.98598	8.79539
Slc25a34	-0.562221	0.261345	0.70196	0.352435	0.471924	0.265893	0.301681
Ccdc92b	-0.115092	0.606802	0.896945	1.36408	1.25927	1.33882	1.07982
Zscan26	0.31288	0.0175116	0.203734	3.80483	3.4952	4.69542	4.34711
Otulin	-0.0596141	0.628503	0.903265	14.5815	17.1187	14.5847	15.7572
Macrod2	-0.252372	0.604055	0.896596	0.420978	0.936108	0.643916	0.49241
Ankrd13c	-0.070085	0.464376	0.838889	8.96901	9.24757	8.41043	8.89697
Fam169b	-0.477764	0.0719373	0.414925	1.42894	1.57406	1.2339	0.921157
Maml2	0.387333	0.423922	0.81735	0.112562	0.221417	0.171832	0.271762
Amt	-0.208963	0.0147383	0.186341	29.012	28.272	25.7147	23.7091
Eif1ad7	-2.5575	8.0807e-37	1.22373e-33	7.34887	7.47884	1.37966	1.12902
Shf	0.322551	0.0422914	0.320495	5.80587	6.87758	7.89073	7.89466
Dyrk2	-0.36269	0.268783	0.710284	1.01303	1.6201	0.986335	1.05058
Zfp985	-0.0777603	0.402028	0.806492	19.6828	19.0882	17.1516	19.4606
Abi3bp	0.300864	0.731717		0.0667143	0.0636913	0.076228	0.0897396
Scn2b	0.194347	0.720366	0.927274	0.142968	0.177026	0.162903	0.202433
Tektip1	0.0252339	0.921243	0.982478	5.47322	5.06405	5.7226	4.99578
Snx13	0.303505	0.149011	0.569137	0.832443	0.760965	1.00288	0.951279
Ttll4	0.153717	0.0794026	0.438056	5.51161	5.73246	6.22896	6.2463
Espl1	-0.0128131	0.864351	0.969722	15.3795	16.5845	15.9779	15.6255
Wdr7	0.251946	0.141721	0.555609	1.17455	1.06022	1.30636	1.34491
Entrep3	0.0643768	0.722615	0.928153	2.49256	2.28622	2.60422	2.38434
Cenpj	-0.0789549	0.678214	0.916277	1.66124	1.67503	1.70854	1.44069
Zfyve28	-0.143828	0.451138	0.832823	1.88055	1.83956	1.55207	1.811
Rap1gap2	-0.0143217	0.971219	0.993612	0.254351	0.201162	0.20815	0.239343
G2e3	-0.147378	0.199066	0.631528	3.67588	3.43671	3.16395	3.24061
Dcaf1	0.235552	0.00955195	0.144493	7.75289	7.84615	9.57866	8.7407
E130308A19Rik	0.0507075	0.820493	0.956495	1.46304	1.47291	1.28228	1.74715
Tyw1	0.0535731	0.606284	0.896945	12.5671	10.7991	11.7958	12.3792
Taf9	0.0997372	0.306395	0.742023	54.4294	46.2359	50.5487	56.9442
Arid3c	0.409565	0.649385		0.167375	0.12085	0.133219	0.227033
Kdm6b	-0.310879	0.00764306	0.126883	3.69869	4.02074	3.26815	2.94043
Rasef	0.284487	0.776174		0.02988	0.0577312	0.0628912	0.0382785
Cox17	-0.17098	0.16329	0.586636	49.5144	51.7456	47.9294	41.7274
Abtb3	-0.0829928	0.652391	0.909451	1.92936	1.9556	1.93377	1.71923
Zscan18	0.459953	0.00723845	0.122936	1.9225	2.01364	2.79052	2.60905
Lamp2	-0.0853624	0.653851	0.909554	4.36004	3.74938	3.933	3.68869
Ddi2	0.172632	0.0386736	0.306099	16.2761	15.1422	17.9567	17.3519
Zdhhc18	0.189671	0.0282267	0.261533	17.987	19.3256	21.779	20.6665
Foxred2	0.289449	0.0331347	0.28191	2.88912	2.85255	3.71197	3.2856
C2cd3	0.220735	0.0656762	0.398436	2.46857	2.83392	3.08768	3.07278
Dppa4	-0.204511	0.0100508	0.149713	77.1351	83.7631	67.3003	71.9482
Izumo1	-0.102704	0.923093		0.150462	0.153905	0.0835233	0.189047
Sp3	0.246582	0.0290291	0.265717	7.91446	6.39564	8.31926	8.60817
Rtl8b	-0.298373	0.35834	0.781626	1.86405	2.19684	1.9008	1.41462
Ldoc1	-0.48974	0.221096	0.655598	1.46155	1.29828	0.728588	1.23181
Kbtbd7	0.202195	0.376747	0.793395	1.50766	0.988065	1.58894	1.27751
Anks6	0.0356918	0.965769		0.0819689	0.108504	0.0652416	0.120451
Adamts15	0.188233	0.780576		0.0521359	0.124434	0.0783825	0.122449
Nxf3	0.264864	0.507768	0.858012	0.359402	0.640378	0.585652	0.612657
Fbxo10	-0.286142	0.289232	0.725134	0.830905	0.948567	0.873328	0.588064
Pla2g4f	-0.259616	0.662238	0.911137	0.210525	0.243676	0.154922	0.223566
Nufip2	0.0169177	0.829406	0.958954	7.61645	7.0754	7.3391	7.48434
Trappc1	-0.0215141	0.858307	0.9683	27.895	30.1725	27.3837	29.6359
Crls1	0.297825	0.0158758	0.194024	8.67894	8.60961	10.4684	10.7337
Add1	-0.179015	0.0190575	0.214271	20.3369	20.3676	18.2394	17.6109
Bcat1	0.358717	3.79864e-07	4.6854e-05	12.6038	12.1365	15.7035	15.9302
Diras2	0.30802	0.716952		0.0789187	0.056507	0.113902	0.053078
Dcun1d2	0.232643	0.162821	0.585996	2.82191	2.75896	3.4247	3.10876
Brd9	0.0988892	0.357736	0.780828	10.5407	11.313	11.8694	11.4739
Fam149b	0.159051	0.410261	0.811851	2.86159	2.61474	2.80549	3.29523
Larp4	0.248205	0.0101116	0.149765	8.09676	6.74731	8.89697	8.67979
Shc2	0.0178065	0.935017	0.985371	1.33059	1.20536	1.28264	1.27844
Snx32	-0.0644997	0.899912	0.978378	0.524414	0.525894	0.565805	0.454463
Cep170b	-0.158968	0.151422	0.571362	4.34549	4.3628	4.16516	3.61037
Ankrd28	0.186141	0.0647371	0.39567	5.55875	5.51394	6.26044	6.31024
Pdp2	0.190193	0.22444	0.658232	2.3597	1.83193	2.48062	2.28757
Rabl6	0.127676	0.129843	0.539255	16.2231	16.771	18.2683	17.6783
Inpp4b	-2.18589	0.00891383		0.190803	0.115508	0.0281004	0.0374133
Xirp2	-0.162326	0.750177	0.935034	0.0932831	0.0675261	0.0634335	0.079975
Tsku	-0.0222588	0.910314	0.979526	3.17378	2.60971	3.14675	2.53021
Pcnp	0.0730487	0.481305	0.848298	12.8861	12.2826	12.9763	13.4286
Cdkl5	0.355736	0.655355		0.111617	0.0869869	0.134246	0.112349
Zfp873	0.163437	0.508257	0.85856	1.57594	1.69603	1.69782	1.96627
Carmil3	-0.530051	0.353905	0.777193	0.15695	0.214054	0.148319	0.107713
Cpa2	0.449651	0.252034	0.691584	0.953737	0.988921	1.28459	1.35571
Zbtb45	-0.0121047	0.961624	0.991674	12.8715	18.0301	15.8156	14.7908
Mctp2	0.653693	0.0639942	0.393688	0.297383	0.225098	0.394336	0.422877
Gm5458	0.00830556	0.991872		0.292276	0.439652	0.449754	0.280821
Lrp3	-0.233883	0.373364	0.792895	1.0283	0.89779	0.904293	0.735829
Gm3696	0.509879	0.576853		0.116185	0.0792287	0.13974	0.148842
Triobp	-0.160962	0.139635	0.552837	12.4018	11.0006	10.7669	10.0931
Gal3st3	-0.260752	0.197778	0.630092	2.63819	2.88716	2.17508	2.42577
Zfp607a	0.64919	0.00930081	0.141947	0.983267	0.7906	1.39443	1.37715
Rps23rg1	0.257421	0.418843	0.81511	1.33899	1.27179	1.65838	1.44987
Cebpz	0.0469852	0.523305	0.864831	27.3397	25.3475	26.7342	27.5463
Adarb1	0.0212764	0.928327	0.984185	0.727579	0.600182	0.682193	0.663985
Gm128	0.265981	0.399156	0.805316	1.50833	1.3754	1.75084	1.69636
Zfp62	0.254235	0.0530477	0.358727	3.51904	3.32585	4.18007	3.96152
Apol7b	-1.79904	0.108328		0.138982	0.157958	0.0696498	0.0148372
Gm14325	0.0577306	0.675714	0.915725	3.09775	3.0967	3.27709	3.14899
Ankrd34a	1.00876	0.00347719	0.0774187	0.743535	0.434598	1.10787	1.26295
Timm9	-0.0283121	0.816494	0.95445	20.2241	21.2094	19.451	21.0733
Ttbk2	0.416264	0.0781186	0.433959	0.315632	0.365376	0.472215	0.433443
Septin10	-0.14617	0.576435	0.887344	2.36349	2.58512	2.30087	2.15844
N4bp2	0.398705	0.137572	0.549644	0.504416	0.491387	0.622932	0.686583
Rfx4	0.885716	0.233407		0.0787093	0.0760373	0.134111	0.142846
Bod1	0.118921	0.244674	0.683146	26.1783	22.7204	26.9814	25.9664
Trp53i13	0.00958092	0.960633	0.991372	4.69897	5.94349	5.51491	5.17018
Ddx49	-0.0470399	0.529865	0.86693	51.8016	55.7786	51.348	52.4965
Cyb5d2	-0.334493	0.506175	0.857358	0.412255	0.451279	0.358829	0.312709
Zfp667	0.341146	0.199615	0.63205	1.14149	0.756076	1.29977	1.09676
Rbfox3	-0.392432	0.673267		0.120389	0.0820957	0.0723985	0.077114
Qsox1	-0.283463	0.191828	0.622324	2.04342	1.62918	1.40902	1.61397
Zfp563	0.344716	0.21649	0.650353	0.438207	0.393234	0.543216	0.516604
Rc3h1	0.0795684	0.604286	0.896596	1.11217	0.954128	1.06093	1.11354
Pbx4	-0.242855	0.342193	0.770642	2.72178	4.08327	2.70617	3.0219
Pik3r1	0.104142	0.745895	0.933886	0.480565	0.32268	0.428177	0.441902
Lrig2	-0.0955929	0.563062	0.881288	1.30583	1.36512	1.23413	1.25005
Ntrk2	-0.120272	0.829055	0.958954	0.0805578	0.0944596	0.0833019	0.073625
Rhox1	-0.2408	0.71047		0.959904	0.480913	0.671503	0.527019
Atf2	0.0526982	0.590349	0.892203	8.12833	7.75346	8.06506	8.36349
Arl14ep	0.163294	0.197278	0.629475	5.06808	4.78036	5.47572	5.53302
Cracr2b	-0.0445194	0.899112	0.978241	1.00288	1.40266	1.11697	1.21922
Ccdc93	0.179307	0.359561	0.782662	0.801342	0.892428	0.992321	0.922557
Zfp78	0.325577	0.431107	0.822183	0.289058	0.221753	0.322673	0.312445
Cxadr	0.31674	0.149561	0.570077	0.783489	0.814035	1.02395	0.960243
Mbp	-0.398657	0.547804		0.135306	0.109264	0.0995699	0.0855284
Trp53i11	-0.0730083	0.532135	0.868383	7.93288	7.91216	7.63333	7.38302
Vegfa	0.572172	0.0083871	0.135121	1.18785	1.21503	1.89271	1.66985
Tpd52	-0.0780656	0.292588	0.728813	18.8236	19.5066	17.7188	18.4931
Dffa	0.229817	0.0950536	0.472942	5.68118	5.15518	6.52697	6.16847
Stx3	0.440266	0.0208279	0.224229	2.0166	1.8588	2.73377	2.51775
Pja2	0.296896	0.140036	0.553291	1.62501	1.15046	1.73596	1.65606
St6galnac6	0.262749	0.136045	0.547856	3.41379	4.00128	3.99089	4.88879
Dclre1b	0.0764578	0.675113	0.915568	2.06093	1.70776	2.06188	1.90816
Tapbp	-0.504282	0.000377401	0.0156823	6.01191	5.54155	4.19851	3.91297
Klc1	0.163293	0.195785	0.627796	7.32576	7.54459	7.85374	8.76395
Rtn2	0.0554886	0.811203	0.952636	4.41732	3.79806	4.3456	4.16731
Miip	-0.311168	0.0130863	0.174421	13.2865	16.3456	11.7448	12.0891
Serinc4	0.275449	0.0748773	0.423801	4.03361	4.07023	5.21544	4.54214
Adcyap1r1	-1.2975	0.159717		0.0279035	0.128439	0.0327217	0.0348529
Zfp943	0.220116	0.520789	0.86443	0.741442	0.636289	0.906877	0.706347
Skic8	-0.0446199	0.644122	0.908028	44.4395	38.6584	38.0808	42.223
Orc2	0.0978585	0.226733	0.66031	22.0337	20.9317	22.4467	23.3949
Insyn2b	0.80277	0.191263	0.621782	0.0926548	0.0817023	0.132575	0.156559
Eno1b	-0.0514271	0.414966	0.81294	208.049	210.35	195.588	207.012
Sufu	-0.0438582	0.712642	0.926292	4.52483	4.39499	4.3732	4.25251
Bclaf1	0.0483626	0.457901	0.836534	32.0069	30.7921	32.1412	32.6147
Src	0.159246	0.18609	0.615432	4.75574	5.01927	5.58615	5.30028
Depdc5	0.0315285	0.770742	0.941692	3.35142	3.40663	3.64218	3.24628
Hmga1	0.176654	0.0154788	0.191355	62.639	58.6191	67.3514	69.3052
Spag9	0.0933457	0.59185	0.89267	1.20224	1.09898	1.22421	1.21654
Btbd3	0.346907	0.0428633	0.322587	1.8692	1.63937	2.38061	2.06267
Crebbp	0.129149	0.276195	0.715857	2.61222	2.83855	2.92736	3.01887
Camk2d	-0.346342	0.353496	0.777093	0.370019	0.305942	0.269804	0.263675
Aptx	-0.0827388	0.539505	0.871797	2.6868	2.82418	2.59378	2.59339
Pus1	0.0783717	0.356893	0.779742	27.3391	28.257	29.76	28.7748
Lhx9	-0.0256576	0.976717		0.0662358	0.049922	0.0471698	0.0636399
Dmbx1	0.811111	0.120995	0.525401	0.188082	0.131172	0.242923	0.30803
Prrx1	-0.127913	0.904285		0.0460671	0.047121	0.0604437	0.0321903
Ankrd12	0.299355	0.266295	0.70721	0.360926	0.300816	0.413429	0.396321
Slc23a4	-1.21179	0.104054		0.215461	0.350993	0.158366	0.0843402
Ccdc141	0.518363	0.134659	0.546824	0.255635	0.250357	0.377786	0.347521
Dram2	0.111735	0.666384	0.912516	1.55892	1.28711	1.45668	1.61201
Nr2c2ap	0.0921038	0.331489	0.761922	31.4206	33.4996	35.3441	33.6747
Rfxank	0.0599555	0.496961	0.853819	12.7158	12.9923	13.7678	12.9502
Zbtb43	0.234009	0.0426909	0.322001	4.65269	4.08478	5.24081	5.018
Ikzf1	0.723498	0.503424		0.0441051	0.00966732	0.0454688	0.0484303
Trim26	0.0386169	0.672175	0.914631	13.8188	13.8614	14.8301	13.5291
Cadm1	0.0381865	0.82987	0.958954	2.04856	1.76609	2.02581	1.8716
Il1rl1	-0.764843	0.0170882	0.201158	0.612878	0.553928	0.403668	0.280409
Gm527	-0.175691	0.648186	0.90872	1.20082	1.05971	0.955771	1.02933
Szrd1	0.0456829	0.555921	0.879212	21.7663	22.488	22.7823	22.7748
Snx22	-0.170002	0.0350343	0.290009	32.6665	35.893	30.7059	30.0795
Otud7b	0.105383	0.398046	0.805316	2.22373	2.17486	2.47633	2.24249
Ccdc50	0.210198	0.116091	0.516684	2.12999	2.08279	2.57148	2.28365
Cant1	0.0189876	0.872155	0.972593	7.84564	8.18061	8.71729	7.48198
Cdc6	0.173742	0.0995753	0.483232	10.6285	9.07499	12.0516	10.1155
Dnm1l	0.0818805	0.367735	0.788801	15.4548	13.3393	14.9256	15.4701
Dnajc19	0.100077	0.485622	0.850252	10.7048	10.1509	10.4337	11.8377
Ensa	0.0556053	0.554866	0.878864	16.4392	16.8385	17.001	17.4919
Entpd5	-0.133374	0.653332	0.909452	0.539878	0.57701	0.487	0.528695
Npnt	-0.555697	0.313512	0.745856	0.249393	0.190372	0.0940158	0.207431
Pik3cd	0.127351	0.520711	0.86443	1.19016	1.30023	1.42616	1.28899
Pknox2	-0.388418	0.49778	0.854039	0.169714	0.297595	0.201206	0.158404
Slc16a6	0.038065	0.780214	0.944638	4.76776	3.76071	4.44402	4.29533
Vrk1	0.109841	0.263256	0.703953	12.7408	11.4409	12.2527	13.7628
Magi1	-0.248483	0.0916677	0.466324	1.66124	1.65868	1.41108	1.37597
Psme2	-0.280196	0.216829	0.650606	6.20929	7.02227	5.36445	5.50379
Atad5	0.096963	0.39538	0.803875	3.18602	2.97101	3.3967	3.17024
Pdzd4	0.0184069	0.806925	0.951094	22.0343	23.0429	22.5533	22.9789
Unc13a	-0.0437927	0.770052	0.941692	1.44864	1.5593	1.47473	1.43347
Urb2	0.0729121	0.318037	0.749558	14.6514	14.9693	15.5918	15.4843
Nova2	-0.387809	0.111286	0.508421	0.563449	0.519754	0.417699	0.40947
Lonrf2	0.830192	0.189215	0.618692	0.0798423	0.0459388	0.108033	0.117467
Usf3	0.418767	0.0348376	0.28895	0.425909	0.572056	0.686147	0.641934
Mex3a	0.246639	0.0153205	0.190482	4.66208	4.72929	5.79368	5.31329
Ate1	0.0578758	0.653643	0.909452	3.18561	3.19171	3.33238	3.28528
Zswim5	-0.0628014	0.813356	0.95331	0.586131	0.759201	0.6178	0.664161
Zmynd15	-0.399537	0.345708	0.773659	0.604778	0.424193	0.348108	0.420588
Gm5796	0.473223	0.593724		0.113832	0.164951	0.154023	0.227855
Zfp114	-0.171817	0.795848		0.154574	0.197638	0.189232	0.127299
Usp32	0.0338733	0.802952	0.949345	2.14264	2.07966	2.08992	2.21408
Trim38	-1.4192	0.108086		0.26783	0.428804	0.042017	0.21258
Specc1	-0.412895	0.104037	0.492779	0.860366	0.624888	0.486783	0.626099
Rilp	-0.122706	0.903949		0.162475	0.13058	0.167499	0.111505
Safb2	-0.0589962	0.464954	0.839295	23.2415	25.3265	23.3575	23.1462
Sec23ip	0.0846112	0.334759	0.763753	10.3426	10.1444	10.6294	11.029
Man1b1	0.0439594	0.646276	0.908459	9.82844	9.58287	10.3054	9.6421
Kcp	0.0106324	0.977548	0.995053	0.328821	0.343578	0.37635	0.298948
Mettl17	0.0903788	0.449856	0.83221	13.2692	15.3185	14.7502	15.6085
Zc3h18	0.0534586	0.438556	0.824853	32.2705	30.9556	33.2011	32.2291
Mcat	0.155882	0.214308	0.648896	8.68412	9.18013	9.85749	9.99332
Ndufs5	0.341172	0.587311		0.986295	1.11323	1.04309	1.56851
Prr7	0.512104	0.0190109	0.214148	3.13727	3.17023	4.7699	4.1933
Dkc1	0.0609012	0.424567	0.817834	46.489	41.0075	45.3711	45.6247
Nudt10	0.235036	0.696632	0.92258	0.3336	0.331196	0.345179	0.40537
Gsk3a	0.0433971	0.58796	0.891192	32.7406	30.453	33.3753	31.5675
Lin28b	0.215288	0.0914072	0.46583	2.88439	3.03811	3.36983	3.4886
Mrpl41	-0.117322	0.376179	0.793377	6.68214	6.45086	6.00848	6.06622
Kcnh8	-0.096454	0.904114		0.148565	0.0533926	0.0651957	0.115737
Smg1	-0.0171457	0.848087	0.964641	2.99483	2.93203	3.02396	2.81791
Pecam1	-0.394933	0.000165606	0.00813378	11.994	10.6326	8.36882	8.79688
Pear1	-0.714128	0.203017	0.636828	0.17769	0.28273	0.174534	0.110023
Klhdc9	-0.178622	0.596291	0.893548	1.31685	1.50544	1.3376	1.15891
Cfap119	-0.186014	0.222377	0.65643	6.21833	8.61041	6.60743	6.39206
Lrrc14b	0.637065	0.151627	0.571362	0.33132	0.377267	0.659768	0.444468
Rnf17	-0.253828	0.034998	0.289973	4.49246	4.09419	3.57124	3.61043
Ntrk1	-0.351455	0.634195		0.146791	0.211574	0.144451	0.141038
Bbs1	-0.167899	0.411849	0.812029	1.13393	1.13787	1.09217	0.921197
Commd6	-0.0623497	0.741283	0.932535	8.97493	7.72757	8.23823	7.75139
Rnf149	0.0298777	0.82068	0.956495	8.69427	7.09285	7.77257	8.28561
Rmdn3	0.262402	0.0288456	0.265105	9.04948	7.99462	10.1676	10.2041
Spindoc	-0.0649579	0.533087	0.868613	11.4346	12.0331	10.451	11.9305
Sdhaf1	0.0475784	0.750332	0.935034	11.5934	12.0041	12.126	12.1982
Ecscr	0.367497	0.531282	0.86777	0.761483	0.3974	0.644844	0.806296
Rnf166	-0.198245	0.169999	0.595858	7.37635	7.78059	6.52408	6.62645
Dipk2a	0.163295	0.30747	0.742905	2.42453	2.30666	2.63387	2.65096
Cfap96	-0.295224	0.773968		0.119254	0.064201	0.0339705	0.11458
Ttc9	-0.406058	0.364137	0.785845	0.301667	0.253467	0.194371	0.220833
Plekhm2	-0.275174	0.0946729	0.472676	2.50018	2.86223	2.10221	2.3147
Dnajb14	0.12593	0.662588	0.911226	1.39662	1.61904	1.51179	1.77128
Fbxo33	0.0822393	0.648531	0.908772	2.48148	2.27321	2.77781	2.2406
Zfp597	0.130953	0.602469	0.895875	0.621652	0.760556	0.8329	0.673413
Tradd	-0.0259583	0.914522	0.980424	3.07247	2.83739	2.85008	2.97596
Shcbp1l	-1.01298	0.247566		0.193923	0.19836	0.136901	0.056707
2510002D24Rik	-0.259167	0.204577	0.638315	5.33652	5.04422	4.19636	4.45625
Dnajc25	-0.00540063	0.982142	0.996536	2.53211	2.14713	2.52185	2.12537
Selenoh	0.00824306	0.911355	0.979639	161.768	174.817	169.493	168.113
Slc22a23	-0.528993	0.185855	0.615131	0.321499	0.267019	0.247872	0.16105
Fam83e	-0.0150634	0.987921		0.0770255	0.0848483	0.0908601	0.0683139
Klrg2	-0.0969008	0.837738	0.961685	0.421936	0.508658	0.462168	0.39816
Rab11fip2	0.520938	0.153722	0.574015	0.337245	0.232185	0.403668	0.414382
Usp31	0.197068	0.213126	0.64772	1.00179	0.887741	1.102	1.05306
Osbp	0.0519557	0.709487	0.925576	3.58873	3.02642	3.56197	3.27153
Cln6	-0.747614	1.0855e-06	0.000122271	7.61025	6.71576	4.54516	3.94554
Tmem181a	-0.0524331	0.760829	0.938054	2.04787	1.91883	1.84024	1.97512
Jrkl	0.500123	0.132976	0.543631	0.616128	0.564823	0.88086	0.79303
Ccdc190	0.0117367	0.991281		0.131487	0.122269	0.140174	0.126334
Skap1	-0.283375	0.749213		0.15762	0.120919	0.120854	0.113582
Nhsl3	0.0608648	0.493413	0.852803	10.4939	10.3818	11.5265	10.1939
Naa11	-0.226583	0.19497	0.626698	2.81094	2.57781	2.42518	2.1665
Fam8a1	0.0579826	0.648466	0.908772	5.16544	4.51802	5.15547	4.90085
Gtf3c3	0.047327	0.675049	0.915546	5.32228	5.13729	5.10737	5.66915
Znfx1	0.143844	0.208558	0.642224	2.98148	2.91572	3.35108	3.14377
Clca4b	0.0298838	0.973726		0.0517512	0.152924	0.114113	0.0828716
Ncbp1	0.0548951	0.494535	0.853114	24.9063	25.9761	25.433	27.2817
Usp30	0.14027	0.345968	0.7739	3.95327	4.10058	4.51888	4.31467
Rpusd3	-0.139436	0.602617	0.895875	11.2957	15.4566	11.0743	13.1571
Zfp575	-0.431502	0.281357	0.719601	0.589129	0.62825	0.401397	0.493779
Pwwp2b	-0.190517	0.458701	0.836685	2.04517	1.5351	1.68558	1.44195
Nlrc5	-0.878976	0.125571	0.532334	0.134265	0.137337	0.0919571	0.0597235
Myzap	-1.21422	0.252169		0.105809	0.146884	0.0681757	0.0435697
Xylb	-0.0553753	0.714578	0.926292	3.01834	3.34316	2.93215	3.17032
Pls1	0.0973369	0.751407	0.935135	0.666263	0.657678	0.785931	0.631198
Ezhip	-0.630065	0.0876295	0.459325	1.38175	1.00272	0.74111	0.78041
Ttc7b	-0.00802301	0.945999	0.987875	6.00441	6.14178	6.25724	5.78835
Prickle1	-0.0896342	0.721922	0.928112	0.89709	1.06769	0.983171	0.857904
Slc45a4	-0.314291	0.0013466	0.0410593	4.97616	4.90297	4.03928	3.8785
Mpig6b	-0.64719	0.477991		0.137373	0.171742	0.144571	0.0513292
Pdzd8	0.110056	0.426564	0.818552	2.25994	1.9396	2.36669	2.15506
Pnrc1	-0.176438	0.345211	0.773209	5.46089	4.98344	5.44117	3.77226
Calr4	-1.24092	0.166315		0.240796	0.173326	0.0965385	0.0856886
Slc5a10	0.331436	0.561916	0.880962	0.320966	0.234507	0.344678	0.3451
Itga1	0.169484	0.798679		0.0921721	0.073657	0.0831443	0.0996297
Mcrip1	-0.193787	0.0740573	0.421985	25.912	29.3295	25.1036	23.1093
Gm9	-1.75436	0.105694		0.124136	0.338603	0.0186629	0.119271
Trim40	0.752923	0.47118		0.0626446	0.104127	0.0565089	0.203139
Vcpkmt	0.0849883	0.618921	0.900295	5.16941	4.39255	5.38737	4.71543
Yeats2	0.0657815	0.523752	0.865071	5.02309	5.49661	5.61981	5.36186
Cblb	-0.0930284	0.61013	0.898199	1.25934	1.1713	1.13599	1.13419
Cln5	0.447343	0.00045519	0.0184369	5.98992	5.79655	7.89899	8.12335
Fancd2	0.0228503	0.831248	0.959355	6.37271	5.85925	5.95757	6.43606
Zfp583	0.158583	0.60975	0.898199	0.894969	0.820086	1.0652	0.836007
Lemd1	0.715126	0.204674	0.638354	0.491251	0.664004	0.917923	0.927138
Plekhg1	-0.338852	0.187571	0.616536	0.643002	0.611257	0.582179	0.406509
Pak6	0.540792	0.0558167	0.367815	0.640091	0.548447	0.8436	0.874584
Afg2b	0.240355	0.399997	0.80584	2.35398	1.8092	2.42844	2.43666
Phactr2	0.0231759	0.94549	0.987702	0.222453	0.256768	0.250371	0.233343
Arfgef3	-0.199059	0.698796	0.922846	0.0859152	0.167188	0.113415	0.102682
Mcu	-0.0718561	0.636103	0.905717	3.92294	4.2026	3.80343	3.9073
Stox1	-1.62971	0.0109049	0.156616	0.276709	0.262823	0.111432	0.0664661
Zfc3h1	0.0432598	0.76046	0.937858	1.95467	1.83467	2.02245	1.87092
Marchf9	0.126591	0.548658	0.876149	3.57107	3.94323	4.99108	3.19135
Agap2	-0.536345	0.395108		0.100776	0.153061	0.0881511	0.082156
Gls2	0.0767986	0.560245	0.880231	7.22176	6.27319	7.30021	6.88473
Qrich2	-0.986043	0.273544		0.151762	0.196085	0.0720515	0.107442
Fam120a	-0.0279092	0.723929	0.928473	14.512	15.4181	14.5733	14.7072
Eif4e1b	-0.700387	0.393433		0.226495	0.231677	0.138931	0.14798
Slc4a7	0.49665	0.00458722	0.0926931	0.9453	0.893098	1.31267	1.28184
Pip4p1	0.0841572	0.373017	0.792584	25.0203	23.1475	25.1419	25.7803
Spata13	-0.025627	0.868445	0.971277	1.51915	1.39083	1.45254	1.39615
5031439G07Rik	-0.208149	0.115836	0.516198	2.51172	2.88614	2.35888	2.29951
Brd1	0.0981308	0.326148	0.757836	8.38985	7.14066	8.28356	8.29255
Gxylt1	0.043745	0.755081	0.936857	2.04067	1.94432	2.04871	2.05276
Kmt2d	0.166165	0.444258	0.828037	1.75053	2.06551	2.41123	1.86269
Spryd3	-0.0176634	0.903569	0.97856	5.1975	4.94752	5.00737	4.9938
Ilrun	0.0621096	0.445614	0.828919	21.1865	23.5237	23.8334	22.7325
Cryzl2	-0.221676	0.443661	0.827908	1.71411	2.24037	1.61304	1.79943
Cdc42bpa	0.0139457	0.922611	0.982753	1.46805	1.62982	1.61136	1.50607
Slc30a10	-0.116699	0.894428		0.035288	0.0721906	0.0424423	0.0593337
Sbspon	-0.607931	0.419882		0.168847	0.179107	0.141027	0.0901278
Usp40	0.0886766	0.616526	0.899803	1.70762	1.46722	1.70981	1.65711
Uap1l1	-0.18516	0.102373	0.489326	14.0382	14.2981	12.2132	12.654
Ddx31	0.0937729	0.447648	0.830197	5.32485	5.75958	6.01933	5.7837
Smim26	-0.233352	0.473104	0.844686	4.81155	6.76724	4.34028	5.48978
Kiz	-0.539363	0.00297189	0.069517	4.05806	4.33032	2.86951	2.88788
Zfp217	0.140883	0.222441	0.65643	4.0309	4.08606	4.77731	4.15432
Gmps	0.13116	0.0922072	0.467365	19.4208	19.4181	20.3331	22.0883
Fhdc1	0.0765982	0.921033		0.0579484	0.0652016	0.0601135	0.0668128
Ciart	0.580453	0.00288066	0.0677515	3.68281	3.85556	5.60743	5.61644
Ampd1	-0.746811	0.421415		0.0958841	0.211245	0.0931461	0.077953
Elapor1	0.113878	0.879734		0.090027	0.0491129	0.0839163	0.0634323
Ndufb6	-0.0471287	0.671988	0.914631	43.286	41.5913	38.5017	43.355
Shb	-0.454512	0.0871999	0.458966	1.60385	1.62132	1.40155	0.939042
Themis2	0.324906	0.545499	0.87461	0.365281	0.228334	0.323401	0.415958
Cox18	0.0264445	0.83948	0.962476	13.2815	15.4197	13.9266	15.2332
Vsig10	-0.0761649	0.666833	0.912563	2.60806	2.42482	2.74663	2.02505
Fbxl18	0.00393319	0.977216	0.994921	5.12292	5.96654	5.67789	5.40619
Pdap1	-0.009048	0.890581	0.975307	69.7631	69.187	69.025	68.6751
Ccdc61	-0.0668426	0.599067	0.894547	9.87721	11.8882	10.5692	10.1509
Hipk4	-0.0428139	0.889675	0.975239	0.932512	1.17957	1.04666	0.998557
Cog7	0.0933068	0.371533	0.791282	9.6804	10.4037	10.632	10.7324
Ppfia1	0.115555	0.23355	0.669843	6.5111	6.68389	7.32296	6.93042
Tmem231	-0.0898453	0.451525	0.832924	7.86102	7.035	6.93703	7.02677
Gucy1a2	0.571055	0.437845		0.0312498	0.0204574	0.0326993	0.0432361
Tmem185a	-0.0260692	0.903502	0.97856	2.74711	2.20886	2.6952	2.14285
Arhgef9	1.02862	0.0361237	0.294554	0.121929	0.155898	0.223028	0.341688
Gas2l3	0.0669101	0.715472	0.926292	1.06432	1.12774	1.08181	1.20364
Tmtc3	0.367273	0.551562		0.17308	0.196009	0.239768	0.231628
Abcc4	0.228151	0.0198224	0.21823	5.97954	5.48531	6.70501	6.69067
Ttc38	0.506708	0.18532	0.614479	0.325842	0.384935	0.554737	0.454175
Rimbp3	0.0189283	0.959419	0.990753	0.469218	0.275973	0.473523	0.276133
Mmp25	-0.114053	0.814867	0.95373	0.329366	0.235831	0.263151	0.253166
Zfp407	0.253471	0.135091	0.547257	1.11568	0.972469	1.27269	1.21169
Cdc42bpg	-0.00613674	0.952296	0.989258	5.7022	5.49995	5.89669	5.21875
Sec31b	-0.777556	0.214727	0.649543	0.193635	0.198066	0.146881	0.0845666
Styxl2	-0.158872	0.0585049	0.377279	14.7515	15.3553	13.7686	13.1279
D430041D05Rik	-1.29024	0.133123		0.0339462	0.0590288	0.0183728	0.0179387
Ralgapa2	-0.0450338	0.833669	0.960346	0.551842	0.601121	0.602845	0.512999
Klhl21	0.117699	0.34827	0.775159	7.32983	5.9872	7.85636	6.55132
Zfp568	0.136271	0.100142	0.484687	9.5396	8.57331	9.9801	9.87379
Ntn5	-0.335161	0.639672		0.27111	0.250476	0.291889	0.142846
Mucl3	0.5606	0.481403		0.118533	0.107773	0.130684	0.196139
Nlrc4	0.0771528	0.851564	0.965915	0.35832	0.361937	0.311103	0.456167
Washc4	0.111706	0.36163	0.784909	3.3617	3.13751	3.37233	3.63157
Dcp1b	-0.0795512	0.707523	0.924501	1.62581	1.7799	1.68211	1.52716
Itpripl2	-0.961162	0.0108769	0.156573	0.294805	0.35777	0.175784	0.158428
Zfp865	-0.0841035	0.492194	0.852693	5.20348	5.99672	5.40572	5.13287
Tbc1d32	-0.000220197	0.999336	0.999833	0.475878	0.464861	0.44	0.500664
Fubp3	0.282693	0.000267165	0.0117652	17.8086	18.6265	22.2801	21.9201
Tmem104	0.0175719	0.930261	0.984711	1.33997	1.29748	1.38868	1.26938
Tmem88b	0.379052	0.664878		0.0889935	0.0606864	0.080277	0.109257
Gfod1	0.555942	0.0218012	0.230166	0.484591	0.5405	0.70452	0.79251
Treml2	-0.53624	0.170792	0.597196	0.418819	0.373878	0.281631	0.263392
Rbm44	-0.216833	0.409372	0.811452	0.974894	0.942306	0.875374	0.769114
Lgr6	-0.236233	0.763715		0.171269	0.0681283	0.124453	0.0822782
Shisa3	0.227203	0.813981		0.0731355	0.051431	0.115451	0.0351346
Ceacam16	-0.35772	0.53144	0.867896	0.453023	0.495717	0.332624	0.394778
Dock1	0.0532874	0.648709	0.908772	3.07278	3.3687	3.37329	3.29582
Thoc2	0.162098	0.180612	0.609492	2.8365	3.13045	3.10143	3.55336
Zscan10	-0.1185	0.112233	0.509386	74.1525	83.3587	71.352	73.3722
Lhfpl7	0.456453	0.697315		0.0847639	0.0867032	0.127436	0.0814418
Trim75	-3.26018	0.000100587		0.342823	0.399759	0.0371094	0.0395264
Kdm7a	0.300989	0.321413	0.753216	0.221211	0.261224	0.311484	0.28166
Nlrp12	0.818558	0.389518		0.0119118	0.0812291	0.0752159	0.0991899
Heca	0.150337	0.641196	0.907546	0.655493	0.526813	0.625079	0.679287
Tmem102	-0.184974	0.453176	0.833882	2.28312	2.08191	2.0595	1.76002
Atxn7l1	0.222243	0.484631	0.849838	0.938506	0.754268	1.00985	0.959692
Lrch1	0.172665	0.387528	0.80052	1.20738	1.26869	1.46537	1.32528
Alg10b	0.0835926	0.677681	0.916087	1.53358	1.61107	1.63263	1.6903
Cdkl4	0.267726	0.697457	0.922714	0.287741	0.0961058	0.312529	0.141053
Garem1	-0.0420894	0.916901	0.981303	0.326669	0.363518	0.443629	0.231088
Arl14epl	-0.527354	0.0145161	0.184387	3.47414	3.03702	1.91207	2.60274
Ap5b1	0.107817	0.700093	0.923039	0.87399	0.966623	0.980557	0.981443
Tmem237	0.271324	0.090694	0.464557	4.96191	4.80236	5.68831	6.08534
Zfp408	0.165268	0.253196	0.69296	3.7026	4.05481	4.80091	3.87929
Accsl	0.0699802	0.740412	0.932381	2.48422	2.5093	2.39497	2.8344
Pdp1	0.117058	0.629703	0.903904	1.03811	0.877919	0.973303	1.09953
Nom1	0.332814	0.000611035	0.022915	9.66101	10.4037	12.2156	12.9832
Nicol1	-0.259783	0.758678		0.91762	0.600713	0.496646	0.670059
Drc1	-0.870608	0.184593	0.613438	0.175124	0.659201	0.296986	0.148069
Tatdn2	0.0944995	0.28714	0.723068	14.0381	14.3423	15.0332	15.1939
Spef1l	-0.404356	0.543661		0.489323	0.54602	0.454772	0.31343
Zbtb2	0.401411	0.00447898	0.0914129	4.63375	3.89085	6.02269	5.21887
Adgrg5	0.0527482	0.901346	0.978526	0.428835	0.507576	0.397885	0.565067
Foxr1	-0.746821	0.0877808	0.459411	0.857573	1.02515	0.484652	0.625418
Bclaf3	-0.0548453	0.606	0.896945	8.21772	7.92974	7.82799	7.68438
Atxn7l3b	0.151068	0.160337	0.582594	9.65261	8.04991	9.87675	9.72772
Tmed8	-0.107189	0.445081	0.828539	2.16804	2.37412	2.29422	1.91541
Gm1322	-0.617135	0.527138		0.113575	0.196602	0.0788086	0.117518
Myrf	0.109524	0.162284	0.584914	12.6843	12.4739	13.9741	13.095
Iqgap3	-0.136218	0.132297	0.542544	7.96838	7.77115	7.28394	6.99567
Mfsd2b	-0.367441	0.4691	0.841732	0.248103	0.47936	0.283483	0.270163
Rnf207	-0.320094	0.453101	0.833882	0.550467	0.691354	0.615976	0.381607
Pusl1	0.171652	0.201281	0.634596	11.5308	12.703	13.9872	13.2188
Mageb4	-0.581746	0.53822		0.178852	0.0878129	0.090347	0.0756105
Zfp213	-0.165864	0.38905	0.801527	3.47838	2.63723	2.8477	2.56986
Gramd2a	0.17441	0.513001	0.860865	0.887698	0.820433	0.865788	1.05639
Kcnk6	-0.237915	0.41753	0.814593	0.814246	0.686907	0.704206	0.568604
Usp36	-0.0407616	0.61799	0.900295	12.842	13.5345	13.3198	12.2562
AW146154	-0.0280557	0.909966	0.979497	1.17798	1.0968	1.1171	1.09796
AW554918	0.0338689	0.889911	0.975239	0.789944	0.73904	0.709676	0.851543
Ccdc102a	0.126484	0.336396	0.764577	7.07175	8.47991	8.55717	8.37473
Layn	-0.585444	0.477855		0.337804	0.138213	0.165418	0.148372
Rfx7	0.179278	0.10116	0.486936	2.92873	3.11645	3.46831	3.35406
Pgap3	-0.242778	0.336377	0.764577	1.55506	2.12811	1.56928	1.54187
Slc47a2	-0.819701	0.00494358	0.0965619	1.50476	1.55405	0.931145	0.796228
Il20rb	-0.308814	0.355581	0.778745	1.10386	0.859267	0.713931	0.867159
Dnaaf3	-0.308331	0.12695	0.534303	3.03171	2.92748	2.31725	2.49041
Lrrc8b	0.362166	0.240395	0.678177	0.308459	0.333769	0.425419	0.396793
Zdhhc6	-0.221395	0.0433403	0.32404	11.1708	11.3966	9.59839	9.70714
Acsl6	0.187632	0.672468	0.914641	0.400338	0.491397	0.601878	0.416702
Acsl4	0.054824	0.728827	0.930144	2.00078	1.99362	2.06931	2.07151
Acsl3	0.203105	0.0839209	0.449961	5.54952	5.05244	6.00064	6.17003
2310061I04Rik	0.164089	0.139619	0.552837	18.2264	18.8141	20.4448	20.961
Zyg11b	0.139567	0.322575	0.7538	1.30033	1.16361	1.39245	1.31594
Prex2	0.165101	0.400544	0.806306	0.963516	1.00973	0.999398	1.2108
Crxos	0.0889402	0.891591	0.975597	0.658571	0.711062	0.330037	1.10733
Pus10	-0.0867224	0.478296	0.847767	7.75342	6.93113	6.44546	7.34521
Dnah1	-0.693616	0.119418	0.522481	0.0951392	0.142547	0.0676896	0.0798233
Fbxw10	-0.25582	0.738213		0.16867	0.124006	0.0570563	0.192446
Mef2a	0.136229	0.543891	0.873296	0.806788	0.825246	0.915307	0.867592
Cemip2	0.0753808	0.468622	0.841458	4.79609	4.29691	4.8258	4.72301
Trim80	-0.587401	0.798411		0.240796	0	0.104583	0.0771197
Vrtn	-1.00944	0.000156995	0.00778435	1.50212	1.50749	0.726071	0.767916
Gm5820	-0.127913	0.904285		0.0943549	0.0965136	0.113484	0.0528832
Pramel17	-3.2287	0.0022057		0.42657	0.195903	0.0157057	0.0501859
Ubtfl1	-2.74346	0.0059635		0.214752	0.199696	0.0293513	0.0375156
Tmem253	0.148215	0.606787	0.896945	2.06876	2.46157	2.33584	2.71785
Zfp551	0.0629382	0.934212		0.183997	0.143037	0.19917	0.1485
Rps27a	-0.0479028	0.691929	0.921962	34.9982	34.2696	29.8608	36.9852
Smagp	0.188393	0.0463022	0.33559	35.4384	37.8774	41.2931	42.0508
Ak8	-0.820096	0.210806		0.485022	0.451017	0.348025	0.180051
Adamts17	-0.2275	0.819		0.0342594	0.0438041	0.0360545	0.0329167
Med22	-0.0391626	0.755586	0.936887	13.728	12.8569	13.3491	12.4518
Thnsl2	-0.419473	0.153008	0.572746	1.48608	1.64238	1.23267	1.0996
Calca	0.0885724	0.672949	0.914666	6.07842	5.09834	5.74939	6.10717
Rabgap1	0.387027	0.0932928	0.470503	0.88612	0.977075	1.22466	1.21069
Ube3a	0.198032	0.105289	0.49495	2.62407	2.43691	2.63998	3.15382
Ak2	0.195206	0.021604	0.229234	37.8292	36.5502	42.3309	42.5543
Ncoa4	0.286825	0.435769	0.823952	0.374205	0.439311	0.575375	0.412653
Il17re	-0.558781	0.395362	0.803875	0.228897	0.354546	0.100289	0.307897
Limk2	-0.0311848	0.722769	0.928192	12.0482	12.0846	12.0067	11.5421
Ccdc160	-0.398276	0.0506851	0.350026	4.58738	4.17732	3.25999	3.36482
Ppp2r1b	0.0400561	0.738144	0.931862	5.30581	5.31122	5.56181	5.33392
Tnfsfm13	-0.42439	0.101781	0.488632	1.73728	2.32198	1.61587	1.38728
Pramel31	-2.5972	6.93426e-09	1.32183e-06	1.07858	1.54456	0.202072	0.223205
Shank1	-0.116893	0.768847	0.941467	0.233259	0.178368	0.204284	0.174072
Ank2	-0.216346	0.466297	0.840034	0.49648	0.613907	0.530053	0.425697
Retreg1	-0.335585	0.401117	0.806397	0.504151	0.515685	0.395454	0.410681
Armc2	-0.203542	0.772646		0.145054	0.0723769	0.0765932	0.112175
Tdpoz8	-1.70906	0.0379381		0.313384	0.330267	0.119929	0.0729943
Erich1	-0.0733266	0.724005	0.928473	5.64097	3.80576	4.52746	4.41349
Tlcd5	-0.18867	0.516553	0.862267	0.843569	0.862869	0.814035	0.673853
Pnldc1	0.0101505	0.930695	0.984711	13.1847	14.4009	13.4229	14.2873
Pm20d2	-0.222879	0.583576	0.889892	0.286507	0.267852	0.264003	0.201279
Shisa6	0.224625	0.788118		0.0458319	0.0351604	0.0682158	0.030825
Bpifb4	-0.582938	0.505258		0.0899153	0.267556	0.110603	0.117806
Ccdc24	0.288773	0.649423		0.391104	0.455231	0.608271	0.388734
Dnai2	-0.605072	0.357975		0.28248	0.172136	0.146382	0.150141
Kbtbd6	-0.0084215	0.979054	0.9956	0.794051	0.718047	0.74742	0.751873
Pnpla1	0.0289672	0.979505		0.04984	0.0352941	0.0345834	0.0405195
Zfp936	-0.154502	0.194094	0.625595	8.29445	8.84008	7.07358	8.27181
Foxr2	0.780348	0.0396095	0.30964	0.46038	0.33402	0.733998	0.612071
Tmem92	-2.92741	4.8347e-12	1.605e-09	1.58278	1.66205	0.167077	0.266939
Zfp345	-0.066917	0.763804	0.939004	2.10772	1.72086	1.82111	1.81773
Trim43a	-1.41192	0.0397659		0.3208	0.461169	0.164242	0.124957
Defb42	-0.800367	0.432837		0.478488	0.489435	0.279285	0.243389
Sorbs1	-0.381927	0.0362525	0.29482	1.60097	1.67429	1.19415	1.31579
Golm1	0.0363433	0.726158	0.929309	9.40949	10.7129	10.6556	9.92342
Setd6	0.00811213	0.938101	0.986304	19.3881	21.8349	20.1576	21.1834
Xpo1	0.128198	0.0566918	0.370116	44.8628	42.2194	46.1332	48.7665
St3gal5	-1.0291	0.000462098	0.0186061	1.62042	1.75961	0.872869	0.782146
Zfp748	0.227861	0.190279	0.620062	2.14962	1.67382	2.33494	2.12969
Trpm3	-1.24121	0.00276	0.0658222	0.148944	0.180829	0.0602719	0.0802469
Zcchc18	-0.0613619	0.859398	0.96831	0.388952	0.576884	0.456113	0.467136
AU040320	0.128696	0.60876	0.897667	0.961883	1.05076	1.01509	1.18888
Pakap	-0.156841	0.211699	0.646216	2.79322	2.71067	2.56722	2.36035
Ap2b1	-0.146819	0.055814	0.367815	15.6387	16.1495	14.71	13.9187
Nrbf2	-0.040607	0.826755	0.95821	4.71069	3.98261	4.01515	4.40599
Atp2b2	0.345544	0.60029		0.0598193	0.0434237	0.0591823	0.0760152
B3gnt8	0.0117519	0.987735		0.279665	0.250305	0.262785	0.268704
Nacc2	0.270403	0.294276	0.730004	0.592533	0.445654	0.689457	0.559742
Cacnb4	-0.396016	0.63365		0.060054	0.0351017	0.0290207	0.0432753
Ccne2	0.108369	0.421348	0.816477	4.58535	4.70723	5.16406	4.81485
Agap1	-0.0923876	0.499293	0.854757	1.60054	1.74904	1.64604	1.48877
Tomm40l	0.139806	0.265549	0.706809	5.67638	6.10169	6.58262	6.36007
Nfatc2	0.1931	0.733016	0.930445	0.208295	0.181881	0.210807	0.2343
Samd4	-0.0494165	0.913067	0.980086	0.161641	0.153	0.150161	0.159942
Piezo1	-0.0523209	0.517675	0.862788	17.4309	20.143	18.5251	17.6274
Cstf3	0.0230678	0.927299	0.984006	5.60298	4.46261	4.81447	5.36211
Slc41a3	-0.276361	0.622981	0.901514	0.395028	0.308992	0.265506	0.32001
Zfp1	0.111609	0.278882	0.718094	15.8636	16.659	16.9712	18.0677
Zfp27	-0.0632573	0.8008	0.948964	1.26052	1.03049	1.18535	1.01004
Rusc2	0.225088	0.283428	0.720639	0.940217	1.17066	1.31314	1.14634
Cgn	-0.465149	0.00360648	0.0793216	2.87635	3.05478	2.44876	1.84131
Kcnh6	-0.380441	0.175126	0.602256	0.961113	0.876071	0.870472	0.536194
Xaf1	0.268346	0.265618	0.706809	1.35673	1.77364	1.94621	1.81226
Slc38a6	-0.16882	0.440812	0.826838	1.71353	2.07467	1.69817	1.66317
Adam15	-0.233273	0.148032	0.567818	3.54089	3.56899	3.14223	2.88849
Adcy7	-0.140289	0.654129	0.909554	0.425459	0.420589	0.419848	0.34294
Fam117b	0.0254909	0.867228	0.97075	2.02007	1.92981	2.02095	1.9886
Creb1	0.0295544	0.822555	0.957097	1.92027	1.84729	1.97777	1.851
Arhgef10	-0.0682505	0.709019	0.925363	1.36339	1.44998	1.34767	1.32832
Arnt	0.0537806	0.590814	0.8923	7.54289	7.06174	7.53718	7.58462
Strip2	-0.512505	0.64082		0.0325753	0.053313	0.0411386	0.0187792
Gpx4	-0.274479	0.0011996	0.0376727	64.635	70.2198	56.3486	54.8436
Tyw5	-0.034364	0.838804	0.962279	6.65853	8.18554	6.87701	7.58318
Timm8a2	-0.229423	0.645717	0.908319	1.50526	0.86608	0.916533	1.0847
Zfp791	-0.277173	0.446625	0.829292	0.882479	0.561927	0.653706	0.539058
Prps1l3	0.151135	0.0870174	0.458359	12.8023	11.5793	13.6077	13.3911
Card9	0.183152	0.824738		0.193946	0.160596	0.149957	0.230713
Baiap2	0.329723	0.0141952	0.182365	4.27685	4.34596	5.44981	5.34579
Brms1l	-0.0169764	0.910326	0.979526	4.6224	4.49484	4.32096	4.66685
Washc1	0.016257	0.873042	0.973065	11.2366	12.0122	12.2235	11.2202
Btrc	-0.133119	0.282804	0.720395	3.04888	2.92129	2.70859	2.72313
Sgk3	-0.258057	0.300309	0.735831	0.860723	0.746722	0.724658	0.615648
Capzb	-0.0405467	0.556537	0.879611	91.966	85.8017	84.8466	87.4905
Zdhhc12	0.0512755	0.669205	0.913601	16.6022	17.1199	17.7444	17.0735
Rai1	-0.104562	0.460576	0.836765	1.89039	2.08143	1.82905	1.84869
Cd6	-0.385656	0.726033		0.0767602	0.0724766	0.0585893	0.0397125
Cdh3	-0.506475	4.25917e-06	0.000384439	7.55762	7.07614	5.09381	5.18381
Spn	0.475232	0.211447	0.645926	0.917446	0.879041	1.24662	1.26086
Cklf	-0.456006	0.158027	0.580469	1.35953	1.39064	1.01093	0.99734
Cnot2	0.0599359	0.487399	0.850754	20.1981	18.373	20.1816	19.9068
Tcf25	-0.0867887	0.178406	0.606057	63.8989	65.9314	61.6101	60.328
Ccdc107	-0.215627	0.342532	0.771017	5.86967	7.22215	5.54416	5.70093
Ripply1	0.0117371	0.952596	0.98927	9.57662	9.09231	9.81037	8.90764
Ccdc17	0.351812	0.679963		0.181068	0.105835	0.163334	0.198825
Lipt1	0.0335327	0.872312	0.972689	4.24147	3.52578	4.10008	3.86193
Lekr1	-0.336593	0.455399	0.835059	0.641572	0.42799	0.408888	0.44222
Tcstv4	-2.30124	0.00434915		0.425931	0.446302	0.0749685	0.0998142
Zfp987	0.0671816	0.624949	0.902304	4.80825	5.21596	5.20695	5.25481
Wdr93	-0.119518	0.809522	0.951892	0.461638	0.39479	0.430076	0.349019
Deptor	0.176092	0.335498	0.764393	0.98213	0.828428	1.09863	0.943638
Dhrs4	0.303309	0.0213482	0.22785	10.0217	10.1242	12.3631	12.4295
Dnajb6	0.0138537	0.900252	0.978378	9.35896	10.3665	10.1686	9.69468
Dusp22	-0.527334	0.0816955	0.444587	1.00632	0.960335	0.720118	0.653588
Dyrk1b	-0.139932	0.492477	0.852693	2.41655	2.73718	2.51854	2.15131
Fer	-0.108672	0.497578	0.853894	3.42935	3.2503	3.09851	3.07456
Dbi	-0.299546	0.00248914	0.062135	68.5061	62.636	54.131	52.1015
Kat2a	0.0834644	0.227267	0.660978	38.9401	39.2398	42.2158	40.3921
Gnpda2	-0.0522156	0.829066	0.958954	2.32689	2.14306	2.24115	2.06646
Grk6	0.237002	0.00217097	0.0567387	23.3414	22.212	26.9177	26.6392
Anapc11	-0.154311	0.10302	0.490741	15.3301	17.6215	15.119	14.4174
Banf1	-0.0449959	0.52753	0.866084	227.723	245.558	223.888	233.622
Ctsa	-0.133135	0.0823087	0.445877	23.2092	23.6161	20.9842	21.5953
Adar	0.0465265	0.629112	0.903623	7.30263	8.34919	7.99708	8.12722
Usp14	0.0620595	0.434164	0.823552	26.8909	24.2092	25.6727	27.5111
Glrx2	-0.454452	0.00157482	0.0457168	4.09348	4.45035	3.23688	2.98069
Marveld2	0.0921314	0.80387	0.94967	0.578485	0.597465	0.780205	0.47487
Kcnh1	-1.26974	0.111745		0.0815673	0.0687099	0.0389532	0.0230502
Txnl4a	-0.0263721	0.693168	0.922165	86.7335	87.6453	84.9628	85.7783
Mapt	-0.0771253	0.783939	0.944796	0.699573	0.562007	0.688684	0.506419
Olfm1	0.281429	0.614289	0.899803	0.608658	0.68989	0.697433	0.821887
Rabgap1l	-0.412914	0.154222	0.575016	0.468692	0.579178	0.403235	0.380042
Ric3	0.150302	0.396907	0.804615	1.42109	1.44694	1.66118	1.51572
Sertad2	-0.0494724	0.756861	0.937331	2.09796	2.19365	2.31303	1.82462
Smurf1	0.0521063	0.647832	0.908638	4.32964	4.3495	4.72045	4.25605
Stk35	-0.15347	0.182126	0.610927	5.90074	5.8713	5.84313	4.70639
Gng2	-0.488865	0.0130942	0.174421	2.13856	1.98211	1.56686	1.36833
Slx4ip	0.213572	0.279773	0.718313	1.27479	1.12519	1.32304	1.44872
Ets1	-0.926209	0.044206	0.328025	0.311007	0.28887	0.174132	0.144257
Slco3a1	-0.445298	0.608392		0.096434	0.14796	0.0978623	0.0810727
Zfp953	0.474839	0.107972	0.50161	0.495558	0.480416	0.640507	0.717758
Slc16a3	-0.228808	0.147854	0.567641	4.85192	4.3461	3.82023	4.00246
Gng7	-0.0721877	0.825114	0.957734	0.626687	0.79487	0.578873	0.765904
Faim2	1.1606	0.288857		0.0222709	0.0303738	0.0602686	0.0570614
Mapk1	0.260423	0.00727204	0.123151	22.1622	19.1206	25.1081	24.1985
Gngt2	0.128944	0.636266	0.905717	5.50097	5.16051	5.81205	5.78179
Kdm3a	0.0788715	0.416322	0.814009	16.9126	13.5197	15.8326	16.2052
Rnpc3	-0.0583063	0.70672	0.924311	3.15723	2.85805	2.71618	3.05051
Fthl17f	-1.50031	0.0352605		0.986202	1.00877	0.254174	0.473776
Elavl4	0.175201	0.778206		0.154309	0.118379	0.135328	0.172971
Fnbp1	0.152169	0.149756	0.570594	6.20378	5.89884	6.99776	6.40596
Gabrb3	-0.237143	0.6694	0.913729	0.152601	0.146536	0.103943	0.149613
Gpr146	0.344526	0.617855		0.136566	0.080428	0.182919	0.0954284
Cdc42se1	0.113361	0.175662	0.602707	23.0667	22.3134	23.5278	25.4194
Tmod2	0.104882	0.722699	0.928153	0.322344	0.241559	0.273668	0.331242
P2rx7	-0.203021	0.522152	0.864751	1.15535	0.870791	0.865447	0.895849
Rcsd1	-0.701394	0.311815		0.319897	0.184059	0.0961882	0.217713
Rnf38	-0.121502	0.296138	0.731795	4.52234	4.37356	4.05747	4.09481
Svbp	-0.107997	0.492965	0.852724	13.511	14.3694	13.6215	12.1559
Atp8a1	0.213107	0.563483	0.881331	0.195911	0.191774	0.216627	0.228713
Kif5a	0.0437433	0.80204	0.949199	1.30469	1.40713	1.49452	1.28765
Kctd21	-0.0875597	0.800105	0.948863	0.669711	0.744088	0.557245	0.7655
Klk13	0.0290901	0.96556		0.668922	0.359219	0.482724	0.5463
Pigc	0.0975417	0.726371	0.929397	0.976063	0.822207	0.94638	0.97793
Trim63	-0.278433	0.413387	0.812263	1.11532	1.44942	1.23698	0.878365
Klhl15	-0.40648	0.244514	0.68284	0.886894	0.61039	0.528413	0.58913
Ldb3	-0.575126	0.234134	0.670334	0.251503	0.311607	0.121423	0.258663
Plpbp	0.194674	0.288946	0.724597	5.65419	4.59032	5.92719	5.75283
Prkcz	-0.147836	0.390588	0.802501	2.14369	2.14991	1.92617	1.93899
Rbms2	-0.289361	0.00480981	0.0946785	6.59299	7.20386	5.49264	5.77684
Mier1	0.123401	0.252415	0.692056	5.318	5.2808	5.87132	5.63902
Mrpl1	-0.00483038	0.971646	0.993612	10.0227	9.39204	9.20841	10.0809
Rapgef1	0.0729744	0.38826	0.800972	11.2571	11.3055	12.6065	11.0654
Seh1l	0.267284	0.000987951	0.0322895	17.8208	16.853	20.3755	21.2502
Sel1l	0.0925444	0.505406	0.857075	2.09178	2.20388	2.34754	2.2197
Skil	0.0866723	0.454713	0.83487	3.6616	3.20815	3.79908	3.47763
Tom1l2	-0.138763	0.522505	0.864783	1.10352	1.19286	1.14617	0.936518
Rasa4	-0.313181	0.0747225	0.423706	3.24779	3.95852	2.96898	2.82161
Trpm1	0.49266	0.358762	0.78211	0.111935	0.123779	0.166466	0.165682
Kcnrg	0.565948	0.581363		0.114656	0.0781864	0.137902	0.137704
Ddhd1	0.0604887	0.767671	0.940618	1.26819	1.13944	1.36659	1.13286
Acsbg2	-0.116442	0.883364		0.0992347	0.189476	0.119354	0.146196
Zkscan4	0.530894	0.315727	0.747992	0.293728	0.314755	0.580386	0.295655
Asb1	0.192605	0.360923	0.784249	0.936957	0.846679	1.10445	0.92785
Hnrnpa1	-0.0631319	0.393576	0.803875	74.1902	66.1619	67.2731	66.6979
Scoc	0.309845	0.0998552	0.483903	4.18487	3.45889	5.14846	4.29011
Camk2g	0.0104492	0.933498	0.984801	5.3114	5.04383	4.93945	5.46872
Morf4l1	-0.0213096	0.924035	0.982753	2.76105	2.36094	2.66347	2.3432
Cd44	-0.470346	0.110265	0.506468	0.796312	0.605677	0.583249	0.425058
Tctn1	-0.0226032	0.858045	0.9683	4.92163	5.1856	5.3931	4.53374
Ube2j2	-0.00405239	0.965499	0.992322	11.3224	11.254	11.1394	11.3083
Clip2	-0.0952582	0.66252	0.911226	1.13923	1.0502	1.09742	0.945932
Eif4e2	0.0515391	0.509884	0.859039	34.229	32.3716	33.837	35.0019
Elovl1	-0.077307	0.609707	0.898199	7.10133	7.13311	6.6939	6.79233
Bicd2	-0.0753066	0.636244	0.905717	1.5917	1.76632	1.57962	1.60202
Npr3	0.340516	0.42665	0.818556	0.153732	0.225729	0.301953	0.173913
Cep350	0.000901932	0.995905	0.999589	0.604662	0.684575	0.679467	0.605792
Ceacam1	0.695253	1.62871e-06	0.000172081	3.0739	2.95124	4.45396	5.2923
Rreb1	0.241331	0.245995	0.685221	0.741263	0.654614	0.816098	0.833863
Fars2	-0.053586	0.722156	0.928112	9.11007	9.66777	8.80917	9.2517
Gmfg	0.683338	0.182924	0.611914	0.274674	0.318925	0.475452	0.463624
Aifm2	0.125321	0.505273	0.857075	2.07986	2.13862	2.33903	2.23962
Zfhx2	0.335544	0.00510203	0.0987377	2.46138	2.91618	3.58514	3.18347
Emc1	-0.113769	0.284104	0.721347	4.65627	4.48862	4.34478	4.07817
Hdhd2	-0.0468603	0.719483	0.926905	7.25368	7.39019	6.67304	7.46721
Zfp982	-0.118176	0.337782	0.765823	5.66518	6.41308	5.2297	5.87131
Mex3c	0.107706	0.428351	0.820333	4.15492	3.52731	4.29423	3.95571
AI429214	0.000161761	0.999752	0.999996	0.525802	0.439229	0.632403	0.319957
Gm14137	0.168411	0.824361		0.095322	0.160593	0.156797	0.118523
Zfp951	-0.92154	7.57998e-06	0.000639508	2.66942	2.86369	1.34547	1.57528
Zfp808	0.124382	0.306551	0.742099	7.42341	8.62562	8.14405	9.31037
Tmem267	-0.39298	0.401787	0.806492	0.584357	0.787006	0.562264	0.477237
Nolc1	-0.00904736	0.881355	0.97479	109.324	113.331	109.487	111.177
Tsc2	-0.123181	0.136265	0.548257	11.9974	13.1867	11.7051	11.3624
Mobp	-0.0635735	0.852885	0.966398	1.59372	1.55982	1.10666	1.88378
Polr2k	-0.382748	0.297253	0.73265	3.7047	3.08247	3.06751	2.07195
Mtcp1	0.20156	0.605235	0.896928	0.831787	0.904667	0.911779	1.09256
Pde4dip	0.0604553	0.809761	0.952059	0.439252	0.447192	0.485521	0.437888
Vgf	-0.00163399	0.995727	0.999543	1.01542	1.0249	1.15254	0.872249
Nsmf	-0.211405	0.587379	0.890951	0.499827	0.655619	0.493307	0.502838
Wdr37	0.12734	0.432504	0.822952	1.96355	2.0882	2.15963	2.25036
Pkig	-0.113549	0.464167	0.838738	11.7505	12.0503	9.73903	12.2065
Tmsb10	-0.0162006	0.930969	0.984711	65.0371	75.7991	76.9135	62.0645
Rab43	-0.134914	0.620286	0.900355	0.82352	0.724202	0.800003	0.601489
Trim46	-0.385313	0.240257	0.678059	0.853894	0.970478	0.753143	0.644188
Kif21b	-0.202164	0.289417	0.725446	0.832515	1.1219	0.880394	0.812584
Tcerg1	0.0273256	0.698399	0.922734	24.2321	24.0388	24.3552	24.7059
Lrif1	-0.131022	0.488992	0.851467	4.32824	4.65797	4.10777	4.07606
Klhl20	0.1013	0.533926	0.868613	2.42439	2.214	2.44444	2.51359
Tmco1	-0.0327786	0.783114	0.944638	7.90066	6.28686	6.59699	7.22586
Kcnj10	0.235441	0.71078	0.9258	0.158626	0.0843727	0.211772	0.0731564
Piezo2	-0.808723	0.476402		0.0192814	0.0230096	0.00869643	0.0154381
Plekhm3	-0.325703	0.111936	0.508896	0.765659	0.746273	0.632809	0.571959
Catsperz	-0.35163	0.116687	0.517451	7.61828	7.83789	5.19404	6.89414
Lipe	0.161848	0.340072	0.768468	2.96709	2.99704	3.23966	3.42691
Pnkd	0.0557064	0.688159	0.920664	4.58805	4.70493	4.99477	4.6376
Ivns1abp	0.485149	9.34362e-05	0.00509395	6.30705	5.81503	9.01733	7.90031
Dhps	-0.0301678	0.697987	0.922714	60.0913	63.9216	60.6902	60.4666
Arl4a	0.0585363	0.625621	0.902721	5.41788	5.21864	5.74228	5.30823
Gtf2a2	0.0364693	0.761199	0.938235	33.0083	30.8807	29.2877	36.036
Dnm2	-0.154709	0.0592788	0.379939	17.7744	17.3639	16.073	15.3976
Rrn3	0.123686	0.0709934	0.413461	43.5427	41.0254	47.3677	44.5243
Leo1	-0.1616	0.0625682	0.389661	25.9714	24.0701	22.2776	22.3372
Parp14	-0.0106847	0.95887	0.9906	0.869856	0.761263	0.759001	0.853983
Zfp784	0.129419	0.721647	0.928049	0.696209	0.974072	1.0467	0.807321
Pdxdc1	0.107884	0.226458	0.659935	13.0601	12.1445	13.485	13.6013
Pstk	-0.0225235	0.853915	0.966888	17.9668	17.3769	16.6209	18.1295
Pigl	0.124443	0.212274	0.647173	8.02984	7.93239	8.84893	8.49877
Lif	-0.192061	0.627897	0.903265	2.99509	2.32235	2.90956	1.74272
Mlf1	-0.713766	0.0394972	0.309117	2.11472	2.14787	1.1956	1.40226
Myo6	-0.293205	0.273072	0.713565	0.452983	0.492446	0.355318	0.416307
Cnnm3	-0.100863	0.443513	0.827908	3.46718	3.45353	3.49658	2.93828
Ermard	0.0197858	0.923612	0.982753	2.83225	2.55379	2.29452	3.15329
Rad54b	0.0362439	0.772874	0.942419	5.85321	6.10772	6.1094	6.11654
Mroh8	0.0412889	0.92364	0.982753	0.374261	0.33178	0.355609	0.364387
Ankrd37	-0.180347	0.602305	0.895875	2.61799	2.26741	2.51671	1.76261
Defb30	-2.30988	0.0695801		0.326662	0.281377	0.108561	0
Evi5l	-0.180689	0.724108	0.928475	0.346108	0.330025	0.216958	0.394543
Abca3	-0.399113	0.0235329	0.240076	1.45533	1.79405	1.26668	1.19152
Glyctk	0.0841927	0.697403	0.922714	1.25106	1.1895	1.32923	1.24236
Edem3	0.372469	0.0214297	0.228336	1.40369	1.3399	1.91692	1.62892
Asphd1	-0.548716	0.510007		0.513592	1.01785	0.694932	0.370098
Tcstv2c	-2.52281	2.89948e-37	4.64924e-34	9.83626	12.2807	1.83764	2.01524
Tesmin	-0.0370724	0.933272	0.984801	0.516624	0.528444	0.549491	0.466743
Iffo1	-0.0934437	0.576176	0.887344	3.17718	3.36045	3.09895	3.01226
Slc30a2	-0.26478	0.0320062	0.277764	6.16001	6.47081	5.49113	5.00114
Mks1	0.0269624	0.822899	0.957097	7.87566	7.60319	7.79038	7.95897
Arhgap12	0.186761	0.11928	0.522322	4.15957	3.69141	4.40941	4.50598
Pkd1l3	0.0636422	0.753612	0.936058	0.964096	0.801566	0.885277	0.954813
Coq10b	0.158967	0.39962	0.805552	3.77383	4.40872	4.86443	4.22707
Tmem120b	0.350155	0.13603	0.547856	2.02425	2.27952	2.55471	2.9263
Fdx2	-0.0295248	0.773096	0.942424	37.3462	38.4418	37.9018	36.1914
Strn4	0.0960334	0.235209	0.671959	16.8664	16.9211	18.3122	17.6996
Map2	0.848589	0.00192726	0.0526932	0.439197	0.414198	0.817647	0.706299
Asxl1	-0.17429	0.0127078	0.172339	17.6429	18.2101	15.8727	15.8124
Zfp606	0.530896	0.330314	0.761633	0.362658	0.249827	0.547454	0.312889
Ahnak	-0.353451	0.565032	0.881331	0.623314	0.68791	0.443892	0.567365
Zfp869	-0.0396802	0.700257	0.923172	9.98324	9.75853	10.0385	9.10927
Rnf213	-0.185081	0.105331	0.49495	1.3934	1.4421	1.25137	1.2371
Sco1	0.212144	0.0746423	0.423706	4.60628	4.25199	5.18304	5.05029
Nynrin	0.0832726	0.446696	0.829292	3.21613	3.28971	3.42329	3.44604
Sytl2	0.147126	0.869281		0.0764254	0.0446708	0.04596	0.0874169
Aak1	0.21553	0.558166	0.880152	0.212893	0.224363	0.31425	0.194219
Arap1	-0.120832	0.311979	0.745463	3.62561	3.79017	3.55304	3.25355
Tmem141	0.255545	0.49178	0.852693	1.76645	2.89991	3.26556	2.28392
Eif4g2	0.279591	3.19902e-05	0.00212688	64.0269	57.6876	71.7779	75.5045
Pdzd9	-0.0433872	0.932515	0.984801	0.522011	0.62113	0.63425	0.450374
Ddx17	0.122641	0.0541715	0.361745	39.3261	39.4287	42.3934	43.1163
Nadk2	0.215416	0.0588784	0.378619	6.20248	5.64957	6.75707	6.96763
Selenot	0.0762973	0.348663	0.775388	16.8091	16.854	17.4287	17.9628
Filip1l	-0.532006	0.258424	0.698931	0.274154	0.364999	0.247302	0.192331
Setd1b	0.0064743	0.949714	0.988833	3.65163	4.07239	3.96571	3.77124
Larp1b	-0.0735597	0.719279	0.926817	1.94006	1.57488	1.74574	1.59839
Tet2	0.483311	1.40675e-05	0.00107214	2.1763	2.24521	3.04253	3.12213
Flot2	0.00849448	0.937172	0.986194	13.0004	11.1398	11.8931	12.3141
Tacc3	-0.135449	0.0704073	0.412295	36.2751	38.3374	33.9852	33.7772
Shroom4	0.305507	0.441433	0.826956	0.165875	0.182396	0.265591	0.163359
Peg10	-0.0656662	0.349185	0.775623	16.9044	16.8806	16.4138	15.7846
Cdkn2a	-0.606942	0.00373876	0.0812047	8.56042	9.10902	6.60576	4.97004
Clmn	-0.732159	0.0082203	0.133618	0.335477	0.369776	0.243921	0.177837
Med15	-0.0263098	0.794646	0.947287	11.3663	10.1912	10.3145	10.8102
Hsd3b7	0.059066	0.783257	0.944638	3.11303	2.79617	3.21179	2.91625
Zfp692	-0.107986	0.414358	0.812916	10.5336	13.3676	11.2025	10.9473
Rap1gds1	-0.0815879	0.590252	0.892203	3.62322	3.40885	3.04425	3.58029
Ung	-0.108084	0.161142	0.58345	53.4625	49.0022	48.9812	45.8318
Uevld	-0.101264	0.632446	0.904581	1.20544	1.26356	1.08401	1.21915
Mtmr7	0.0727322	0.480408	0.848171	10.3596	10.7551	10.3547	11.7974
BC051019	-0.754186	0.233394		0.416563	0.317304	0.239849	0.212892
Pex10	0.0772054	0.672316	0.914641	4.96769	5.01716	4.66037	5.84817
P3h1	0.106201	0.391824	0.802701	6.19765	6.10858	6.54807	6.66979
Cabyr	0.531938	0.627448		0.0944126	0.107303	0.0946282	0.181425
Kntc1	0.0960891	0.287801	0.723814	6.09822	5.93513	6.33739	6.48503
Zhx1	-0.0652313	0.809057	0.95172	0.708745	0.583996	0.642287	0.595847
Golga7	0.0657026	0.487443	0.850754	35.788	29.8454	33.735	34.7494
Tmem183a	0.0694775	0.4062	0.809211	20.2533	18.4055	20.3763	20.0596
Dlgap4	-0.096086	0.339322	0.7676	9.87303	10.4928	9.97371	9.02937
Hvcn1	0.102692	0.403535	0.807746	6.76397	7.34759	7.9536	7.14461
Anapc5	-0.0892395	0.191191	0.621771	76.371	81.2642	72.5175	75.2849
Rabl3	0.332552	0.0934239	0.470748	4.60902	3.00646	4.84924	4.68214
Fam133b	-0.157312	0.306342	0.74201	7.51095	5.85975	5.55938	6.38196
Pitx2	-0.401225	0.320538	0.752218	0.733985	0.712859	0.655407	0.441652
Trim71	0.353782	0.0274632	0.258191	2.23106	2.82981	3.63151	2.81687
Txnrd1	-0.0330979	0.58882	0.891565	74.5034	72.2836	71.7175	71.3413
Blm	-0.00262815	0.977595	0.995053	8.70173	9.31481	8.97513	8.9548
Cacna1b	-0.70272	0.0601685	0.382316	0.22394	0.202009	0.138382	0.121983
Capg	-0.407142	0.000769283	0.0270471	16.0297	15.4111	11.8752	11.7825
Akap1	0.0229402	0.778092	0.944276	19.837	17.9781	19.4341	18.8749
Rpf2	0.0882624	0.302452	0.737699	33.9051	30.8038	33.6291	34.9679
Map2k7	0.116054	0.362228	0.785163	9.46796	9.88053	10.7508	10.1722
Apaf1	-0.0930034	0.507203	0.857666	2.22929	2.34476	2.2857	1.99055
Wsb1	0.0370825	0.70813	0.924856	18.7768	16.1303	18.2014	17.4982
Cd63	-0.27635	0.00851899	0.136519	33.674	34.9535	29.3783	27.1479
Arrdc3	-0.00933736	0.922967	0.982753	12.0072	10.3223	11.267	10.8585
Arrdc4	-0.0640138	0.54319	0.873198	7.56006	7.08448	6.99435	6.97187
Hbs1l	0.0643025	0.421288	0.816477	23.8326	24.8854	25.2017	25.6216
Cd74	-0.36853	0.454351	0.834701	0.879033	0.674358	0.682806	0.516133
Ryk	-0.0105063	0.913694	0.980418	11.5138	10.8738	10.8536	11.3014
Selenop	-0.259851	0.282622	0.720272	2.64629	2.11308	1.83268	2.13248
Cadps	-0.855601	0.437099		0.0694868	0.0290768	0.0341896	0.0182082
Dhx15	0.356449	1.56909e-05	0.00117829	25.5715	22.3747	30.6767	30.5356
Phc1	-0.0942094	0.129002	0.538253	86.4415	90.0375	81.9412	82.9565
Clk1	0.0142963	0.881925	0.974844	21.9739	21.2987	20.8689	22.7088
Nusap1	-0.155218	0.0638085	0.393253	24.361	22.4382	20.5313	21.3599
Oip5	0.167859	0.250581	0.689678	9.30645	8.28559	9.0238	10.6854
Tbc1d17	-0.156018	0.164102	0.587258	11.8634	14.2331	11.7674	11.6089
Fzd5	0.459668	2.55743e-06	0.000252139	4.41945	4.21645	6.08217	5.76415
Smad7	0.145182	0.22809	0.662103	4.49496	4.18664	4.99255	4.58616
Mterf1b	0.0887285	0.806215	0.950628	1.38235	1.1826	1.21295	1.49721
Gpcpd1	0.221306	0.352412	0.776694	1.59157	1.11306	1.4632	1.67087
Fancc	-0.00704465	0.971678	0.993612	2.10047	1.89805	1.9291	2.03906
Rbpms	-0.199467	0.0079096	0.130235	47.8136	43.8368	39.1752	40.4052
Syne3	-0.0995647	0.915763		0.0410302	0.0710242	0.0227763	0.0788442
Ilf3	0.027573	0.697275	0.922714	36.4528	38.7223	37.9504	38.486
Prss57	-0.653775	0.216414	0.650353	0.395663	0.352494	0.259047	0.220736
Ankdd1b	-0.221434	0.664911	0.911806	0.358514	0.228534	0.262469	0.234634
Drc7	-0.694413	0.476646		0.0670528	0.149644	0.0439893	0.0878521
Calcr	-0.508264	0.452882		0.133993	0.197973	0.120869	0.114437
Pcdh8	0.0283209	0.967327		0.180336	0.0851361	0.150159	0.119955
Rarg	0.378896	1.54212e-07	2.11239e-05	50.7403	45.4443	62.7562	61.9515
Mast2	-0.155282	0.0983265	0.480103	8.10379	9.00692	7.83435	7.49396
Neo1	-0.166648	0.123106	0.529346	3.72982	3.69224	3.26248	3.33009
Slc22a18	0.623541	0.224466	0.658232	0.46236	0.461403	0.76294	0.628436
Proc	-0.997946	0.0490924	0.345681	0.770141	0.922805	0.297733	0.539112
Sema3b	0.0761478	0.873234	0.97308	0.27157	0.244826	0.28234	0.260927
Eml1	-0.200373	0.64467	0.908028	0.314973	0.351853	0.358892	0.222989
Map6	-0.146229	0.539847	0.871797	2.03045	1.82106	1.85149	1.61159
Rad17	0.0382377	0.728358	0.930144	10.1375	9.17546	9.65389	10.1242
Ubtf	-0.0280798	0.646672	0.908522	58.9711	59.591	58.9411	57.0322
Timp1	-0.278508	0.0318527	0.277383	22.8937	20.0778	17.7763	17.571
Zfx	0.325632	0.0113635	0.16033	2.12333	2.10671	2.59215	2.69503
Clpx	0.146701	0.22283	0.65643	7.42237	6.58196	7.62454	7.81843
Zfp2	0.066803	0.753441	0.936058	1.71688	1.77316	1.98336	1.66024
Zscan21	0.0616922	0.615689	0.899803	8.24773	7.91751	8.34129	8.48577
Zfp41	0.246064	0.0968303	0.477273	3.40395	3.33778	4.32768	3.63445
Slc7a2	-0.589901	0.26106	0.701876	0.16238	0.109213	0.0802608	0.0983117
Cacnb3	-0.311819	0.00169056	0.0481211	15.9393	17.8973	13.7725	13.4245
Gcdh	-0.0732529	0.443735	0.827908	18.5899	19.1817	18.6634	17.1419
Zfp68	0.212261	0.238827	0.676808	1.48892	1.65559	1.87765	1.75085
Rbak	0.256809	0.115516	0.516095	2.9983	2.7914	3.79107	3.09563
Mapk1ip1	-0.0737777	0.587589	0.890951	9.60806	10.2085	9.28752	9.48071
Mef2b	-0.303442	0.158079	0.580502	4.3308	4.37667	3.57814	3.43632
Zfp180	0.128483	0.295908	0.731557	4.99877	4.68331	5.03431	5.52202
Mfge8	-0.560305	2.35373e-09	4.86063e-07	24.2576	25.9937	16.8048	17.1843
Raph1	0.000525444	0.996763	0.999636	1.80037	1.95906	1.83128	1.91618
Akna	-0.0333954	0.88032	0.974762	0.901669	0.893376	0.904043	0.842182
Synj1	-0.177319	0.348101	0.775056	1.05151	1.04793	0.968468	0.882834
Proca1	-0.950749	0.26117		0.216113	0.349037	0.123123	0.163928
Fam83b	-0.624038	0.322166		0.106055	0.113905	0.083709	0.0560442
Clint1	0.159807	0.0822443	0.445705	11.8705	11.1769	12.8677	12.8089
Prss38	-0.649398	0.462648		0.333918	0.284632	0.112955	0.294095
Bahd1	-0.0653645	0.755557	0.936887	1.30333	1.32918	1.36812	1.14044
Cep126	-0.000399336	0.998861	0.999833	0.84642	0.763928	0.869675	0.739316
Cyb5d1	0.207745	0.125777	0.532403	4.31345	4.1597	4.80564	4.95884
Hsf5	-0.232516	0.753472		0.140433	0.0887227	0.119227	0.0714333
Fkbp15	0.0722468	0.593711	0.893091	3.26311	3.64741	3.62441	3.6225
Morc3	0.264035	0.00149356	0.0439993	12.5839	12.1427	14.6891	14.9135
Ccnjl	0.524381	0.170966	0.597196	0.640968	0.421942	0.847246	0.652432
Spata22	-0.587958	0.425758		0.352866	0.444233	0.281577	0.234717
Zzef1	-0.0509332	0.7435	0.933302	1.1311	1.41145	1.13461	1.31096
Xlr5a	0.779658	0.374014		0.156874	0.106976	0.188679	0.271307
Zfp868	0.0999927	0.381324	0.796332	11.3595	9.7511	10.9376	11.6163
Tulp2	0.403059	0.186157	0.615432	1.02847	0.940423	1.27915	1.31006
Pick1	0.0714721	0.448437	0.831009	19.1768	19.6066	21.0104	19.6423
Zfp952	0.317869	0.149214	0.569547	1.53025	1.53022	2.08601	1.72264
Rbm15	-0.0888164	0.559947	0.880231	3.62137	4.1659	3.86319	3.4391
Nelfe	-0.0286596	0.73692	0.931862	39.1036	35.9949	37.3714	36.0451
Mink1	-0.165233	0.147466	0.567121	4.78244	4.65401	4.20445	4.1882
Snrpa	-0.0799824	0.240572	0.678177	116.081	121.57	112.243	112.02
Net1	0.214718	0.0651313	0.39676	6.16495	5.29813	6.62611	6.6355
Dph3	0.0181295	0.869466	0.971537	9.6159	8.41995	9.03378	9.17335
Pard6a	0.26792	0.162925	0.586125	4.65629	5.04135	5.98103	5.6642
Ttc21b	-0.0327931	0.886096	0.975239	1.08508	1.1257	0.961383	1.19096
Agtpbp1	0.22589	0.37695	0.79358	1.15215	1.17851	1.26201	1.45716
Dusp16	-0.365208	0.0439846	0.327142	2.66419	2.07246	1.89868	1.77154
Rpl38	-0.0210184	0.949768	0.988833	6.70968	6.21977	5.81607	6.9
Idnk	-0.291551	0.285782	0.722179	2.48728	2.76021	1.79917	2.46871
Hnrnpab	0.0964401	0.116165	0.516729	223.768	216.313	227.89	241.245
Bdnf	0.0910196	0.885217		0.148444	0.11388	0.156222	0.126779
Mon1b	0.0480118	0.765589	0.940139	2.12806	1.93448	2.18429	2.01409
Syce1l	-0.0421612	0.959398		0.374442	0.446844	0.356532	0.399741
Azi2	0.418356	0.0850833	0.452772	1.6421	1.27352	2.03978	1.83639
Zgpat	0.245697	0.0397143	0.310104	8.89972	9.39315	10.5913	11.057
Nfyc	-7.52159e-06	0.999944	0.999996	16.832	17.1333	15.774	18.0944
Jak2	0.0779595	0.825817	0.957882	0.463274	0.335955	0.495865	0.342142
Ghr	-0.928674	0.405258		0.207144	0.172155	0.116784	0.0746345
Ccl27a	-0.256685	0.588927	0.891567	1.53795	2.45981	2.06836	1.28961
Agbl5	0.00738706	0.947281	0.988285	7.30211	7.26051	7.12009	7.4783
Zfp455	-0.639435	0.465281		0.215373	0.077753	0.114281	0.0730348
Gypc	-0.843734	0.271498		0.299202	0.177185	0.113641	0.151303
Med14	0.16259	0.247292	0.686239	1.90792	2.04658	2.09922	2.31073
Dbndd2	0.172817	0.700911	0.923338	0.302406	0.299505	0.376706	0.299778
Smim15	0.262202	0.0275901	0.258891	12.7337	10.8463	13.5991	14.5823
Tnpo1	0.249334	0.0203861	0.222104	4.74988	4.54119	5.73883	5.27363
Usp33	0.292219	0.0162712	0.195859	4.6039	4.11899	5.44118	5.20924
Lyrm9	-0.213895	0.408298	0.810521	0.838887	0.753859	0.606603	0.763588
Cbx5	0.00655932	0.91792	0.981493	23.6753	24.0879	23.6907	24.1631
Zfp874b	0.0202963	0.921195	0.982478	1.62035	1.51775	1.47396	1.70116
Bsg	-0.11212	0.0915309	0.466193	108.266	105.049	98.5261	98.3084
Fcgr2b	1.11676	0.00849534	0.136461	0.602618	0.502256	1.16772	1.22233
Abi1	0.186668	0.117131	0.518323	6.35435	5.83071	6.58518	7.24129
Hs6st2	-0.00428367	0.990599	0.998299	0.368896	0.351692	0.35538	0.364762
Odr4	0.00280974	0.987737	0.997147	2.29935	2.47516	2.33094	2.44068
Ap2a1	-0.0278955	0.710553	0.925712	24.5304	24.8458	24.0006	24.2962
Hnrnpd	0.0396904	0.532844	0.868613	40.0472	37.2273	39.6607	39.5458
Plin5	-0.527405	0.287112	0.723068	0.562146	0.566161	0.343259	0.440401
Gsta3	0.232844	0.537771	0.870822	0.997943	1.22493	1.04847	1.52285
Nexmif	-0.409351	0.0149782	0.188326	0.909166	0.969982	0.694488	0.714163
Git2	-0.0384017	0.756114	0.937107	4.3732	3.95327	4.28722	3.80371
Fhl1	-0.149288	0.41859	0.814964	3.93939	2.98119	2.92373	3.3111
Ptbp1	0.0502074	0.414777	0.81294	135.677	127.099	138.905	132.431
Tsc22d3	-0.147634	0.731641	0.930328	0.744223	0.523871	0.512521	0.62279
Nrp2	0.541398	0.000114636	0.00599783	1.64014	1.62809	2.36305	2.37972
Gba1	0.00021225	0.998702	0.999833	8.60555	8.74876	8.20446	9.11696
Scn8a	0.211768	0.441659	0.827094	0.243986	0.27902	0.323981	0.279561
Gnas	0.0140751	0.8491	0.964993	30.7421	28.1745	30.3108	29.0259
Nme2	-0.130552	0.0443807	0.32849	360.527	383.742	341.65	336.551
Tsks	0.806533	0.231274		0.188468	0.231336	0.442021	0.280676
Shroom3	-0.206784	0.0539215	0.360876	4.2991	4.52845	3.98222	3.64565
Ints14	0.106715	0.325484	0.757507	8.62709	9.05573	9.2956	9.68953
Pigw	0.549916	0.0659057	0.398962	1.09509	0.917893	1.30338	1.6294
Prmt2	-0.251877	0.196232	0.628523	3.41138	3.56697	2.78852	3.05108
Urgcp	-0.741556	2.44946e-06	0.000243686	2.53253	2.31428	1.4194	1.4701
Cfap210	-0.402119	0.395865	0.80396	0.70757	0.632014	0.530391	0.47876
Lrba	0.770329	0.00241144	0.060908	0.304627	0.327576	0.542535	0.534719
Dysf	-0.217498	0.397106	0.804647	0.578273	0.901462	0.690198	0.572594
Hdac5	-0.184907	0.0702251	0.411847	8.87755	9.12253	8.25419	7.53334
Fmnl1	-0.0157508	0.956828	0.989685	0.690953	0.884622	0.8503	0.703442
Ptpn6	0.10122	0.416025	0.813925	8.44997	8.65125	8.64707	9.65883
Shprh	0.37443	0.01481	0.18672	1.3481	1.4347	1.79055	1.81194
Slc39a7	-0.100317	0.189123	0.618689	51.5623	55.1405	48.2882	50.9859
Stag2	0.162752	0.112682	0.509893	4.76865	4.89845	5.5686	5.22321
Sdhaf3	-0.0375641	0.914279	0.980424	4.14401	3.21123	3.22838	3.92127
Srsf1	0.202509	0.0066112	0.115973	48.708	42.3356	50.8598	53.5676
Henmt1	-0.870799	0.311006		0.164354	0.336228	0.174419	0.0928897
Tmem134	-0.183226	0.1374	0.549497	14.6047	17.2773	14.4567	13.5405
Zbtb33	0.184334	0.41868	0.815026	1.15106	0.978801	1.41987	0.992691
Syne1	-0.0204687	0.969789	0.993069	0.0919266	0.0599845	0.0686258	0.077664
Srsf5	0.0601042	0.400884	0.806324	105.022	95.3323	102.543	105.713
Glyr1	0.131112	0.0702699	0.412012	32.2926	30.3125	33.7489	34.6232
Tcf7l1	-0.461406	1.80001e-09	3.86349e-07	31.9804	32.6387	23.0451	23.7533
Hnrnph3	-0.0622336	0.479889	0.847963	22.8336	24.3075	22.7129	22.2978
Trim33	0.0700176	0.445754	0.829011	4.50447	4.46005	4.78736	4.59936
Gpc6	0.0670853	0.919099		0.0709149	0.0777185	0.0845306	0.0730024
Paip1	0.000547487	0.996312	0.999636	4.51955	4.49279	4.56388	4.43505
Bcl11b	-0.655559	0.224357	0.658232	0.149392	0.106303	0.0956991	0.0686483
Repin1	0.25275	0.209049	0.642385	2.51032	2.06537	3.17515	2.26512
Fgfr1	-0.332861	1.9265e-05	0.00138561	15.8999	16.3724	12.8393	12.7103
Trim72	-0.161898	0.732148	0.930328	0.410441	0.462526	0.363965	0.414407
Med1	0.198954	0.0673824	0.402486	3.61602	3.64749	4.10407	4.2168
Casp8	-0.0481278	0.858212	0.9683	1.41355	1.31445	1.30086	1.33072
Rnps1	0.126037	0.274579	0.715079	12.9947	11.9305	13.0954	14.0311
Tmpo	0.197137	0.0163079	0.195859	22.256	19.9423	23.5388	24.6971
Cenpm	-0.142106	0.14638	0.56502	31.9891	32.9116	30.7823	27.885
Clta	-0.0156441	0.833146	0.960203	112.975	127.273	118.113	118.953
Srsf10	0.105311	0.204415	0.638121	26.7198	23.9131	27.8082	26.4994
Mark2	-0.0988774	0.288341	0.723814	10.5263	9.76202	9.85059	9.03738
Usp6nl	0.0917791	0.661943	0.911137	1.29798	1.11977	1.42818	1.14432
Hdx	0.278008	0.670413		0.145195	0.0990116	0.101869	0.193757
Gsg1	-0.468078	0.566875		0.225913	0.44772	0.292942	0.189927
Vamp1	-0.162509	0.658445	0.910574	0.560844	0.590384	0.569765	0.460388
Btaf1	0.223329	0.0183753	0.210371	4.03178	4.19441	4.79806	4.77998
Gtf2i	-0.138746	0.0411251	0.316091	35.3061	36.8794	33.2578	32.1339
Ambra1	0.04674	0.601443	0.895678	8.80387	9.22639	9.43643	9.14121
Zzz3	0.192691	0.0409425	0.315358	4.98586	5.43715	6.04965	5.83402
Bltp3a	-0.0633763	0.564859	0.881331	3.24807	3.64662	3.42761	3.15354
Pdpk1	0.445743	0.383283	0.797483	0.567458	0.340258	0.714864	0.526417
Myo1c	0.100288	0.280904	0.719051	7.62659	7.36897	8.3159	7.72108
Ret	-0.0906678	0.867408	0.970835	0.103034	0.112577	0.114066	0.0922463
Ash2l	-0.27764	1.39809e-05	0.00107077	102.176	96.6033	80.0803	83.4347
G3bp2	0.093883	0.172556	0.599276	69.6145	63.0298	68.727	72.4024
Aff1	0.247225	0.0497437	0.348305	2.56187	2.75795	3.50092	2.80118
Bicdl1	-0.305255	0.0293951	0.267199	5.5261	5.76884	4.97972	4.12963
Cps1	-0.587211	0.298156	0.733123	0.170728	0.136532	0.0980041	0.10737
Rab11fip1	-0.0897468	0.525915	0.865548	2.20808	1.80908	1.95489	1.80279
Gipr	-0.513803	0.336286	0.764577	0.472925	0.700937	0.522373	0.296745
Cdc14a	-0.30559	0.431216	0.822183	0.364542	0.384657	0.287299	0.317073
Arid1a	0.00598987	0.931138	0.984748	21.5717	22.8877	23.0637	21.4737
Cass4	-0.046103	0.889301	0.975239	0.691715	0.579727	0.479044	0.758936
Znrf3	0.077415	0.687547	0.920293	1.08374	1.03055	1.19621	1.02557
Rapgefl1	-0.0737726	0.86422	0.9697	0.268735	0.405981	0.369214	0.262175
Lrp8	0.0740678	0.773293	0.942424	0.537207	0.441044	0.531349	0.495778
Rbpj	0.0190084	0.7985	0.948406	17.3221	16.6112	16.7904	17.4914
Cdr2l	0.0934751	0.542872	0.873046	3.32333	2.87711	3.48769	3.11281
Atxn1l	0.353845	0.0277815	0.259526	1.82271	1.77165	2.6994	1.88196
Med13	0.030419	0.802453	0.949345	1.78621	1.81206	1.89232	1.77263
Foxk2	0.225005	0.0320826	0.278161	6.36183	6.36782	8.00652	6.82372
Slc16a5	-0.180683	0.814613		0.170615	0.104711	0.143644	0.0983571
Zfp429	-0.0451356	0.957864		0.135369	0.164429	0.167902	0.121935
Ttc5	-0.0741969	0.421934	0.816809	22.0773	21.7138	20.8997	20.5844
Sp2	-0.0425418	0.676062	0.915852	13.5137	11.9822	13.0273	11.6574
Aurkc	-0.671947	0.0601623	0.382316	1.81459	2.19358	1.28514	1.19594
Tmsb15b2	-0.253066	0.45632	0.835441	4.79242	2.82712	2.99638	3.289
Golga2	0.178813	0.119749	0.522481	4.78114	4.84929	5.53834	5.32968
Thg1l	0.058228	0.567068	0.882003	8.56152	8.2251	8.40056	9.03031
Sri	-0.217299	0.103252	0.491129	7.34723	6.66398	5.9739	6.03899
Rsbn1l	0.251162	0.0960233	0.475304	1.98187	1.85959	2.19774	2.3587
Tead4	0.897034	0.000743627	0.026433	0.753649	0.974072	1.58628	1.62785
Ddx23	0.0331096	0.665804	0.912256	38.3714	42.4035	41.288	41.1616
Ddias	-0.06863	0.558121	0.880152	8.70448	7.15334	7.69086	7.38642
Trmt2a	0.020363	0.793527	0.946932	20.2874	19.561	19.9392	20.3605
Brca2	-0.0122394	0.899828	0.978378	4.34858	5.10335	4.637	4.70913
Etl4	0.0583999	0.492273	0.852693	7.32831	7.44851	7.48524	7.86802
Zfp382	0.29002	0.173938	0.60124	0.683482	0.657084	0.924808	0.708649
Parp8	0.280262	0.601238	0.895582	0.0947695	0.104394	0.124943	0.121407
Srgap2	-0.0127747	0.910902	0.979576	2.81872	2.96852	2.79729	2.92195
Zc3h7b	0.180775	0.0586549	0.377947	6.06314	5.98864	7.0117	6.61792
Adamts6	-0.224458	0.811643		0.025338	0.0622024	0.0502837	0.0243449
Zfp780b	0.205741	0.414727	0.81294	0.859704	0.643599	0.738973	0.987622
Katnip	0.0465224	0.833694	0.960346	0.77573	0.767882	0.815123	0.780057
Cacna1s	-2.18598	9.02146e-08	1.27418e-05	0.370325	0.598834	0.0957947	0.117732
Cfap91	0.240946	0.553428	0.878203	0.424471	0.504418	0.574344	0.527787
Kcnt2	0.684643	0.301233		0.0373988	0.0658827	0.104956	0.0658774
Sipa1l3	-0.171434	0.107226	0.499296	3.6989	3.93177	3.36678	3.39541
Tmem243	-0.0313932	0.894649	0.976267	4.24597	4.39673	4.27143	4.1635
Sbf1	0.0197783	0.838179	0.961866	6.97857	7.83979	7.81412	7.16583
Fbxo11	0.164859	0.20404	0.637585	3.23833	3.15732	3.65388	3.49644
Nav3	-0.36514	0.677415		0.0373704	0.0295378	0.0275811	0.0228492
Srgap1	-0.590903	0.119191	0.522182	0.225222	0.289097	0.179261	0.163357
Dock9	-0.116646	0.547712	0.875467	0.835887	0.877335	0.789453	0.786351
Coq10a	0.0745463	0.750857	0.935034	1.72783	1.62709	1.73177	1.79845
Vps51	-0.102279	0.386099	0.799368	8.33822	8.0135	7.44479	7.74732
Ptpn23	-0.179886	0.056894	0.370756	12.2432	14.4553	12.1508	11.3601
Kansl1	-0.0156045	0.85838	0.9683	9.34523	9.77057	9.62911	9.23759
Efcab3	-0.813337	0.272934		0.178141	0.597266	0.142838	0.294775
Cnksr1	-0.00637695	0.986891	0.996875	0.771491	0.62414	0.531436	0.86929
Slc25a18	-0.688279	0.387506		0.43011	0.284674	0.319515	0.121545
Nhs	0.578246	0.390109		0.0581165	0.0990769	0.122323	0.108575
Qrsl1	0.059165	0.641281	0.907546	8.7764	9.18326	8.95973	9.7032
Trappc10	0.153851	0.288135	0.723814	1.97199	1.82592	2.06473	2.15496
Xpot	0.209407	0.00512496	0.0989386	12.82	12.6675	14.963	14.4362
Tecpr2	0.198821	0.276712	0.716257	1.01437	1.27564	1.46958	1.15182
Cdk13	0.124158	0.277164	0.716814	3.69996	3.17907	3.76653	3.70648
Mcur1	0.137874	0.615603	0.899803	0.650929	0.738457	0.80425	0.720178
Bdp1	0.379727	0.0054845	0.103352	1.25956	1.35226	1.65578	1.73528
Ccno	-0.996135	1.77599e-06	0.000183378	4.69984	4.07642	2.41314	1.96294
Pdzd2	-0.092514	0.777006	0.944024	0.279849	0.186752	0.260539	0.178296
Zfp707	-0.100406	0.496572	0.853819	6.66447	7.62114	6.87761	6.41206
Dennd3	-0.165591	0.609212	0.89804	0.425766	0.495347	0.363542	0.45592
Ltn1	0.147344	0.144929	0.562127	3.73746	3.78656	4.19618	4.11039
Rgs11	-0.62701	0.0791526	0.437385	1.0073	1.24864	0.71613	0.754572
Lclat1	0.161646	0.58446	0.890243	0.53734	0.596745	0.616274	0.652726
Cep76	0.252707	0.0638923	0.393458	3.481	3.06446	4.10273	3.66524
Fra10ac1	-0.343506	0.0110671	0.158112	11.9121	11.6847	9.04811	9.53179
Gucy2g	-0.487492	0.357475	0.780575	0.295918	0.212333	0.219125	0.144282
Cwf19l1	0.015482	0.898704	0.978033	5.71211	5.64607	6.08514	5.35889
Lct	-0.805126	0.428225		0.0445586	0.0569726	0.0125607	0.0481638
Ogfrl1	-0.0225243	0.912936	0.980075	1.52444	1.16768	1.25681	1.39317
Phf3	-0.0126729	0.874383	0.973605	9.71119	9.28958	9.75614	9.02496
Gls	0.0393092	0.812341	0.953084	2.04877	1.76643	2.00107	1.91195
Cubn	-0.286499	0.468779	0.84166	0.124873	0.179134	0.116764	0.133148
Sapcd2	0.0734387	0.612641	0.899057	3.70769	4.18467	4.39568	3.90165
Ppig	-0.11578	0.127896	0.537101	17.6296	16.0427	15.2801	15.7063
Klhl41	-0.861242	0.750513		0.182929	0	0.0122231	0.0911347
Lrp2	-0.556709	0.000134061	0.00681784	1.11795	1.0053	0.67398	0.766166
Gpat2	-0.331144	0.0830218	0.447605	2.9556	3.81774	2.59485	2.78916
Esf1	0.215893	0.0286637	0.264194	10.2055	9.26004	11.4822	11.069
Cep152	0.0329305	0.81604	0.954165	2.2345	2.4598	2.38751	2.39664
Taf4	0.143272	0.170708	0.597118	6.02235	5.9731	6.56602	6.64231
Arfip1	0.387337	0.0185055	0.211329	3.14014	2.65799	3.89805	3.66478
Znhit6	-0.0336465	0.725044	0.928759	14.6872	15.7055	14.2809	15.3228
Grik3	0.288787	0.0712666	0.414261	0.987256	1.00397	1.23229	1.19306
Zfp362	-0.833885	0.00322095	0.0737195	1.58814	1.24584	0.861707	0.722793
Aunip	-0.156923	0.167213	0.591413	20.61	20.7905	19.7281	17.3026
Morn1	-0.634944	0.118906	0.521638	0.937813	1.25771	0.808361	0.610717
Uvssa	-0.0893607	0.847005	0.964231	0.185246	0.122325	0.139604	0.15095
Nsd2	-0.0629082	0.547028	0.875369	4.30268	4.30451	3.99337	4.2272
Stim2	0.344385	0.0508068	0.350169	1.43193	1.45395	1.80646	1.84002
Chrna9	0.672857	0.00126319	0.0389957	2.30152	2.23119	3.35429	3.8533
Helq	0.0407974	0.738077	0.931862	6.34615	5.3489	6.00279	5.99416
Lamtor4	-0.0304733	0.820372	0.956495	17.397	19.4658	18.3559	17.6606
Lmtk2	0.046281	0.652277	0.909451	4.36651	5.08609	4.84838	4.88824
Tmf1	0.198929	0.221827	0.656189	1.39167	1.77874	1.82474	1.80232
Ankrd26	0.331406	0.0446432	0.329702	1.27319	1.14331	1.53799	1.49118
Ipo8	0.242108	0.0194651	0.216168	5.43617	4.95878	6.13328	6.12813
Clip3	-0.152252	0.213689	0.648298	5.89323	6.0438	5.54272	5.16453
Nccrp1	-0.0040239	0.994014	0.999258	0.470491	0.767407	0.584996	0.623098
Arhgef17	-0.00806258	0.955699	0.989425	1.25705	1.38696	1.24732	1.37526
Mki67	-0.0599897	0.393949	0.803875	11.3133	11.661	11.1044	10.8797
Phrf1	-0.0383737	0.614919	0.899803	15.9438	16.2037	16.1611	15.0636
Abhd13	0.133276	0.273086	0.713565	3.96995	3.63187	4.3437	3.97032
Fam89a	-0.596	0.376284		0.463613	0.474219	0.384296	0.216702
Cep63	-0.0161753	0.894504	0.97625	7.69014	8.64548	7.73401	8.36694
Arhgap36	-1.30378	0.236352		0.085251	0.0930149	0.0307604	0.0382246
Map7d2	-0.117529	0.616482	0.899803	1.662	1.17657	1.28323	1.3217
Gli2	0.30707	0.00141604	0.0422318	5.09214	4.84183	6.34248	5.91882
Gpr161	-0.617598	0.116662	0.517426	0.241	0.295303	0.176634	0.173666
Adamts14	0.0451897	0.774517	0.943031	1.99897	2.12308	2.26299	1.98464
Mtr	0.0203388	0.866544	0.970226	4.4654	4.35475	4.30607	4.61245
Ogdhl	-0.00310086	0.970511	0.993509	18.2724	16.8551	17.0139	17.935
Dhtkd1	0.678765	0.0165886	0.197759	0.823906	0.60838	1.26213	1.00708
Upf2	0.0569867	0.591432	0.892523	5.31209	5.00806	5.34724	5.36613
Kif16b	-0.0133075	0.943379	0.986974	1.37332	1.29469	1.24737	1.39246
Kcng1	-0.613778	0.275221	0.715796	0.232322	0.207392	0.175274	0.109579
Prrg3	-0.3016	0.47295	0.844666	0.266158	0.2249	0.219212	0.177897
Ankrd35	-0.101497	0.551112	0.877469	2.23229	2.46569	2.32757	2.03879
Zfp518b	0.120915	0.332669	0.762421	2.9466	3.29961	3.66543	3.10896
Tigd2	-0.168341	0.398865	0.805316	2.15763	2.11357	1.9257	1.85918
Prickle2	-0.0741796	0.916994		0.0484213	0.0720423	0.0675034	0.0465236
Cyp2b23	0.49847	0.000482208	0.0193018	5.56377	6.28035	7.73112	8.94743
Kat6a	-0.0454663	0.672382	0.914641	3.44481	3.73759	3.70577	3.23557
Lonrf1	0.044058	0.828562	0.958954	1.68631	1.4545	1.6527	1.57205
Gan	0.293957	0.252648	0.692128	0.911604	1.17704	1.14585	1.41672
Npat	0.105815	0.375643	0.793377	3.13486	2.70167	3.1317	3.13113
Marf1	0.126141	0.292571	0.728813	2.65005	3.08465	3.09805	3.14229
Rap1gap	0.292611	0.0474713	0.340711	3.44294	4.14541	4.79847	4.4898
Trnp1	-0.347215	0.546663	0.875271	0.498651	0.573817	0.590377	0.239554
Cluh	0.122721	0.0813399	0.44336	19.0599	19.1563	21.0694	20.4325
Mdga1	0.422567	0.222968	0.656583	0.229366	0.209062	0.294987	0.285835
Fam171a1	-0.473233	0.0605669	0.38361	1.0905	1.10696	0.699429	0.872469
Slc4a11	-0.143501	0.342346	0.770858	3.72704	3.92817	3.61499	3.30112
Chsy1	0.232368	0.113606	0.511976	2.95495	2.60031	3.34757	3.16507
Otud4	0.191257	0.00971097	0.14654	12.6193	11.8922	14.2784	13.6361
Phf21b	-0.054141	0.803673	0.949589	1.35762	1.43119	1.30379	1.38871
Sap30l	-0.0964448	0.468051	0.841107	11.3867	11.1018	11.2936	9.63825
Aspg	-0.189626	0.646224	0.908459	0.467199	0.607046	0.47839	0.46102
Pacs2	0.0943264	0.425926	0.818175	4.21771	4.16633	4.83372	4.09469
Lama5	-0.330325	0.0594012	0.380455	8.91545	11.0112	8.38137	7.4372
Frmpd1	0.112696	0.849797	0.965121	0.132295	0.135322	0.112887	0.1649
Lrch2	0.242417	0.261073	0.701876	1.28497	0.928633	1.32606	1.28829
Itpkb	0.0229161	0.977938		0.0471373	0.0860995	0.0668178	0.0614648
Polr3g	0.082121	0.40621	0.809211	13.9208	12.3078	14.5041	13.1701
Kif13b	-0.00797929	0.951338	0.988924	1.97262	2.26676	2.00772	2.19789
Adgrf5	-0.228361	0.74534		0.0644404	0.061795	0.076294	0.0290226
Heatr5b	0.115091	0.444096	0.827908	1.75724	1.66592	1.87509	1.82478
Maip1	-0.0305685	0.790081	0.946008	6.29558	6.17129	5.94569	6.22297
Atp8b2	-0.0396611	0.755185	0.936878	3.14012	3.3089	3.08618	3.16578
Virma	0.206369	0.0406573	0.314494	4.28045	4.06917	4.71852	4.88411
Focad	-0.107467	0.457459	0.836343	2.27754	2.29915	2.04908	2.18827
Flnc	-0.0298439	0.814971	0.95373	2.04746	2.14815	2.20138	1.89496
Exosc7	0.0297828	0.73687	0.931862	50.9227	55.1949	52.7252	55.3255
Uprt	0.196972	0.528558	0.866087	0.279885	0.383378	0.37761	0.383497
Eml5	-0.0154537	0.888594	0.975239	2.56522	2.67952	2.48561	2.68994
Hcn4	1.04835	0.342692		0.005218	0.0373617	0.0353019	0.050135
Lemd3	0.109341	0.542214	0.872427	1.56982	1.57607	1.74964	1.62325
Kcnh4	0.163877	0.715822	0.926292	0.391537	0.218875	0.328547	0.358695
Arid4a	0.301293	0.0915688	0.466207	1.37927	1.20667	1.69563	1.48264
Hnrnpul2	0.0760625	0.248821	0.687763	28.0862	29.0912	30.2692	29.8496
Mamdc4	0.429951	0.445258	0.82854	0.138549	0.194864	0.285108	0.166399
Dpy19l4	0.0304236	0.874192	0.97355	0.98524	1.03122	1.10691	0.949073
L1td1	0.130677	0.0307159	0.273087	153.523	151.999	162.888	170.653
Sbno1	0.109889	0.142455	0.557287	7.87428	8.07182	8.59542	8.56876
B3glct	-0.0346091	0.888927	0.975239	0.832021	0.928075	0.906747	0.795795
Nipal1	1.03213	0.30151		0.0245048	0.0543085	0.0736824	0.0784815
Dgki	-0.188293	0.824931		0.0272659	0.0239054	0.0187393	0.0261973
Prdm14	0.107058	0.46355	0.838582	4.74484	4.80588	4.86076	5.40689
Mrpl44	0.0565237	0.566846	0.882003	24.8776	23.2706	25.8322	24.1117
Irs2	0.027888	0.90107	0.978489	0.792683	0.787578	0.931378	0.674297
Ermp1	-0.0390523	0.71729	0.926292	4.89792	4.73618	4.6884	4.65391
Pprc1	-0.115847	0.136381	0.548633	37.761	43.3503	36.8367	37.831
Phip	0.0320565	0.812794	0.953168	1.4291	1.31742	1.43381	1.36846
Zfp174	-0.595148	0.456098		0.083728	0.064971	0.0572965	0.0388363
Hcfc2	-0.287193	0.392016	0.802842	1.10705	0.888137	0.900713	0.72301
Myo1a	0.408423	0.482229	0.848617	0.139233	0.216265	0.232585	0.237824
Gpr179	-0.0524105	0.947109		0.0369381	0.0415615	0.0399843	0.0354905
Ercc6	0.276946	0.0358357	0.293528	1.8141	1.71367	2.24387	2.01161
Esco1	0.111888	0.494972	0.853247	2.1469	1.92103	2.23036	2.16099
Rbbp8	0.0998314	0.442384	0.827549	4.2555	4.39186	4.61675	4.61526
Slf2	0.177389	0.0840675	0.450215	4.06777	4.19152	4.79474	4.52811
2310009B15Rik	-0.510969	0.131216	0.541041	5.11811	3.93415	2.75916	3.60812
Tsc22d2	0.115255	0.669944	0.91402	1.52646	1.4056	1.88383	1.28667
Map9	0.493065	0.0170328	0.200734	0.89271	0.746339	1.23409	1.06751
D5Ertd579e	-0.0732224	0.661369	0.911017	1.3461	1.53537	1.41357	1.32262
Pigg	0.335914	0.117426	0.518699	1.07577	1.04779	1.35214	1.32621
Mn1	0.303045	0.41366	0.812448	0.243119	0.28201	0.411483	0.228774
Spring1	0.147838	0.393232	0.803875	3.22482	3.33153	3.98895	3.24687
Klhl42	0.100597	0.633421	0.904679	1.02857	0.873194	1.17274	0.860339
Palb2	0.0560579	0.653598	0.909452	4.63522	4.82107	4.81876	4.9871
Prmt9	0.00781581	0.946313	0.987934	8.35685	8.07913	8.72301	7.75553
Ripor1	-0.410989	0.00925461	0.141931	2.98687	2.95706	2.38575	2.0722
Tln2	-0.0842656	0.413146	0.812199	2.48301	2.58048	2.4255	2.33386
Polr3a	0.202019	0.0317288	0.277122	8.01905	8.68391	9.53207	9.62301
Vcan	-0.263287	0.145586	0.56323	0.644777	0.713195	0.55547	0.573077
Myh13	0.262274	0.245493	0.684417	0.690208	0.855575	0.947099	0.902006
Pbrm1	0.167561	0.106752	0.498144	3.41465	3.70321	4.00044	3.97367
Uggt2	0.0585162	0.920139	0.982262	0.11122	0.0920952	0.119436	0.0941396
Lrch3	0.298361	0.0708413	0.413342	1.41316	1.71615	1.95409	1.88301
Kdm3b	0.0934822	0.269309	0.710741	7.6973	7.85114	8.57777	7.96274
Flvcr1	-0.0289516	0.871357	0.972021	1.97281	1.85444	1.87824	1.86316
Tnks1bp1	-0.039683	0.749116	0.935034	3.39653	3.88711	3.46572	3.60527
Alg6	-0.0478837	0.799952	0.948863	2.30799	2.32683	2.40147	2.07396
Dnaaf5	0.222073	0.0287562	0.264582	8.61814	8.08284	9.86097	9.5554
Ccdc142	0.3802	0.222777	0.65643	0.687185	0.663544	0.927338	0.813431
Rsf1	0.046686	0.664505	0.911806	2.29556	2.24236	2.35601	2.31973
Prss53	-0.246724	0.120461	0.52446	4.34315	4.9369	4.05285	3.73471
Dscaml1	-0.0734568	0.900349	0.978378	0.123699	0.080049	0.0865339	0.109149
Pgd	0.0490327	0.472941	0.844666	54.1881	54.1852	56.0954	55.7234
Cfap126	0.0368386	0.955949		0.560612	0.538684	0.796865	0.342771
Ak5	-0.248146	0.758971		0.150315	0.08483	0.0888366	0.104583
Tbc1d4	-0.0827037	0.871151	0.971965	0.18384	0.103293	0.126127	0.149269
Mfhas1	-0.0727236	0.871545	0.972126	0.192477	0.213287	0.24838	0.133563
Nlrc3	0.401976	0.559236		0.0400895	0.114233	0.111072	0.0935446
Ibtk	0.154567	0.104069	0.492779	6.16825	6.30001	6.86019	6.9846
Nalf2	0.0231824	0.926754	0.983742	0.727418	0.939284	0.890054	0.799248
Mup6	-0.740995	0.00908135	0.140813	4.20184	4.23772	2.42649	2.62227
Fat1	-0.14138	0.0484732	0.344024	7.45103	7.36569	6.60474	6.79238
Mpp7	0.0724617	0.702316	0.92339	1.37309	1.77597	1.58803	1.71805
Taf2	0.0777011	0.416327	0.814009	7.13386	6.84867	7.35577	7.3709
Prrc2c	0.0378435	0.611165	0.898299	11.2528	11.8456	12.3496	11.3056
Ccdc88b	-0.400238	0.195358	0.627167	0.552828	0.604597	0.492408	0.384173
Rprd2	0.00534844	0.960641	0.991372	3.12195	3.10994	3.25027	2.9898
Prr19	0.113729	0.620516	0.900453	3.40693	3.38959	3.86556	3.45242
Arhgef26	-0.260189	0.214131	0.648742	1.13636	1.23669	1.05187	0.929951
Adgrl2	0.197166	0.255513	0.69539	1.3424	1.25674	1.44181	1.53025
Cdh18	-1.08867	0.141015		0.188295	0.250384	0.135882	0.0723662
Tshz1	-0.0896011	0.882526	0.974932	0.108013	0.119692	0.135325	0.0836007
Trio	-0.36154	0.172848	0.599984	0.461573	0.450672	0.455567	0.254859
Atf6	0.00178953	0.990743	0.998299	1.72217	1.4931	1.50988	1.69671
Ptprz1	0.557211	0.423301		0.0533261	0.0436369	0.0654202	0.07378
Ppp1r12b	-0.264492	0.310301	0.744266	0.419658	0.437064	0.328654	0.383051
Taok3	0.0682679	0.81456	0.953662	0.601443	0.694182	0.722158	0.63644
Pik3r4	0.0509372	0.590362	0.892203	7.66098	7.93362	7.9283	8.18047
C2cd4b	0.0385192	0.949241	0.988833	0.568786	0.357013	0.489754	0.471972
Brpf3	-0.207337	0.00914133	0.141421	12.7134	12.8895	11.4578	10.6561
Dsel	0.0655276	0.845168	0.964051	0.369075	0.365341	0.445691	0.317433
Ric1	0.138415	0.48034	0.848171	0.96203	0.956005	1.07301	1.02966
Cyb561d1	0.396378	0.111342	0.508421	0.872208	0.787449	1.1931	0.971794
Pds5a	0.107744	0.164414	0.587541	8.10771	8.48102	9.03373	8.79884
Myo5c	-0.215594	0.342986	0.771029	0.761088	0.718213	0.638	0.632773
Mphosph9	0.282602	0.039414	0.308872	1.76228	1.94789	2.13024	2.37348
Neto2	-0.255566	0.397474	0.804882	0.582269	0.471377	0.404462	0.481665
Agl	-0.228738	0.213264	0.647783	0.849102	0.800875	0.727237	0.676705
Zkscan2	0.639306	0.38684		0.06691	0.0528861	0.0877913	0.0905872
Dnah2	-0.480524	0.297739	0.733026	0.0906406	0.094002	0.0692712	0.0616875
Slc9a5	-0.248019	0.148434	0.568271	2.10147	2.31464	2.11254	1.5982
Plekhg4	-0.871378	0.0684843	0.405917	0.331172	0.293854	0.147568	0.19935
Cul9	-0.414263	0.247472	0.68667	0.261479	0.258471	0.196226	0.192118
Dgkh	0.296933	0.233651	0.669843	0.252802	0.236937	0.331985	0.268878
Sipa1l2	0.310091	0.00636973	0.113337	3.10716	3.23525	4.02354	3.8267
L3mbtl1	-0.649059	0.478991		0.0483939	0.0792018	0.0582053	0.0216987
Setd2	0.116729	0.158971	0.581422	6.81981	7.12955	7.70791	7.37531
Scaper	0.169502	0.365565	0.786808	1.3629	1.20977	1.48062	1.40392
Adgrd1	0.434139	0.352497	0.776694	0.166905	0.19121	0.280037	0.208473
C9orf72	-0.0751633	0.701223	0.923386	2.11943	2.14557	2.16314	1.87366
Stxbp5	-0.218836	0.463501	0.838582	0.367608	0.30818	0.244429	0.336815
Chd2	0.102109	0.278192	0.717504	5.00757	5.64056	5.89038	5.5062
Rhobtb1	0.350801	0.467716	0.840672	0.218789	0.179036	0.251185	0.256079
Slc43a1	-0.27751	0.0983961	0.480103	3.87409	3.82368	3.22488	3.10188
Cped1	-0.286475	0.758546		0.0492359	0.0683489	0.0317239	0.0675804
Skic3	0.281491	0.0572824	0.372309	2.44242	2.11609	2.87121	2.65677
2210408I21Rik	0.453791	0.302946	0.738272	0.619915	0.513317	0.789977	0.784705
Prdm2	-0.0294714	0.794833	0.947287	3.49824	3.65277	3.72993	3.25504
Vma21	0.28055	0.0883624	0.459678	2.14366	1.99603	2.63486	2.3741
Lrrc7	-0.0476653	0.895797	0.976766	0.10127	0.0664814	0.0790803	0.0827788
Ubr5	0.0522645	0.417106	0.814377	23.078	24.2403	24.4408	24.4941
Trrap	-0.137481	0.0853534	0.453361	6.02137	6.44179	5.68835	5.61147
Cenpf	0.0185073	0.822969	0.957097	5.24332	5.3996	5.31053	5.44429
Arhgap21	0.0768226	0.451882	0.833131	4.15888	4.17798	4.44238	4.32213
Cystm1	0.37415	0.267456	0.708813	2.90528	3.15005	4.14074	3.65675
Vps8	-0.140432	0.404288	0.80819	1.83692	2.14988	1.79974	1.80789
Tbccd1	0.211675	0.211228	0.6455	5.27797	3.641	4.86621	5.42492
Shank2	-0.526029	0.515437		0.066697	0.0409338	0.0360986	0.0384498
Dmxl1	0.10218	0.51064	0.859087	1.01866	0.883439	0.949392	1.08568
Cep164	0.0290278	0.777307	0.944024	5.51981	5.90841	5.98065	5.64603
Chd5	0.165115	0.44294	0.827549	0.508316	0.553371	0.62884	0.558165
Kidins220	-0.156793	0.345448	0.773372	1.34468	1.28501	1.22347	1.12433
Ankrd11	-0.028389	0.678563	0.916351	17.1077	18.053	17.3559	17.0332
Elp6	0.0803814	0.558774	0.880152	6.88982	6.49287	7.19314	6.90831
Zfp777	0.0859183	0.430184	0.82132	8.78877	8.45305	9.672	8.58762
Kmt2c	-0.0892664	0.50693	0.857638	0.981948	1.09125	0.919911	1.027
Ctcfl	-1.0147	0.221821		0.128398	0.153225	0.0723888	0.0668232
Rimbp2	-1.11369	0.0290274	0.265717	0.179347	0.18345	0.0753499	0.0896997
Palld	0.077078	0.631085	0.904118	2.96146	2.61779	3.2017	2.67128
Mdn1	0.12936	0.0853841	0.45341	5.69483	6.20024	6.51571	6.46229
Tmem248	0.0036403	0.965138	0.992247	15.5309	15.2722	15.7244	15.0687
Amotl1	-0.0947837	0.591129	0.892423	0.911252	0.959573	0.915448	0.834987
Tbc1d31	0.147146	0.334283	0.763296	3.99006	3.61308	3.80104	4.60842
Prss33	0.0253156	0.976282		0.174528	0.280533	0.281132	0.179666
Hapstr1	0.0885853	0.378052	0.79406	8.14078	7.46502	8.35828	8.18609
Adamts3	0.699703	0.229067	0.663494	0.0567212	0.109075	0.0920981	0.178754
Wdr70	-0.00483392	0.972216	0.993612	7.15085	7.77521	6.87856	7.95258
Lrr1	-0.090098	0.600022	0.894815	5.86257	5.72731	5.39165	5.44578
Plb1	0.450924	0.645213		0.0321933	0.0585419	0.0774403	0.0412421
Agmat	-0.342338	0.748032		0.208888	0.125687	0.0886724	0.165284
Phf20l1	0.240258	0.228219	0.662162	1.01088	0.881018	1.00027	1.23142
Sclt1	0.0506798	0.770568	0.941692	2.88831	2.66188	2.74472	2.98394
Bcr	-0.220861	0.0821376	0.445647	3.21923	2.99402	2.84456	2.47344
Unc13b	-0.265982	0.181315	0.610426	1.08563	1.19589	1.04491	0.848962
Samd1	-0.0169327	0.827198	0.958454	34.9171	34.0339	35.1195	32.8432
Fndc1	-0.19223	0.778417		0.128127	0.0598309	0.0653264	0.0963433
Bicra	-0.33105	0.0538738	0.36069	1.73528	1.962	1.49877	1.42997
Dip2a	0.0621387	0.789391	0.945556	0.689446	0.730207	0.815349	0.665033
Abitram	0.0367505	0.829723	0.958954	2.22104	2.18604	2.50798	2.0035
Galnt16	-0.334213	0.541821	0.872393	0.237035	0.202048	0.154424	0.18557
Bod1l	0.0899682	0.444921	0.828536	2.0829	1.98374	2.06134	2.25358
Ttll5	-0.197691	0.239001	0.676946	2.04517	1.95419	1.82887	1.6517
Dip2c	0.358338	0.0695669	0.409573	0.79856	0.658734	0.906241	0.957016
Flnb	-0.110726	0.176096	0.602933	7.30075	6.93312	6.74455	6.40687
Fam184a	0.137254	0.778847	0.944296	0.222442	0.236454	0.247868	0.25144
Ccdc15	-0.0826445	0.741271	0.932535	0.338683	0.373081	0.292455	0.378254
Zscan25	-0.0444495	0.722225	0.928152	6.12647	6.2606	6.15405	5.83537
Ankrd44	0.232027	0.590204	0.892203	0.185158	0.192264	0.19486	0.253375
Ino80d	0.255663	0.0515717	0.352547	1.3765	1.77501	1.90859	1.84765
Fbln2	-0.789108	2.84824e-09	5.75112e-07	4.90371	4.93061	3.04804	2.6209
Wdr86	-0.352719	0.148041	0.567818	2.44873	3.22463	2.39152	2.03783
Ncam1	0.133788	0.479835	0.847963	1.1318	1.02401	1.14136	1.22104
Iqck	-1.58013	0.110668		0.193492	0.325984	0.0924039	0.0984224
Nin	0.420942	0.0335703	0.282872	0.543881	0.590867	0.795238	0.718954
Furin	-0.128357	0.487913	0.85085	2.19991	1.76895	1.88764	1.72902
Plcd4	-0.0982483	0.864688	0.969901	0.359737	0.245311	0.387125	0.169787
Ppp2r5c	-0.106619	0.224513	0.658232	15.5401	14.0067	13.3609	13.9991
Sh2b1	0.0553397	0.554126	0.878492	13.0881	13.8	14.6887	13.1784
Gtf2ird1	-0.0482365	0.655144	0.90998	6.55256	5.91594	6.26588	5.7549
Zxdb	0.794159	0.329007		0.0549004	0.0374377	0.0687822	0.0937756
Nasp	-0.126336	0.0395477	0.309334	226.488	238.485	211.138	213.733
Brwd3	0.280839	0.149004	0.569137	0.566216	0.500755	0.567778	0.724935
Fbxo9	0.0199581	0.906666	0.978845	5.77592	4.87726	5.87515	4.91301
Tbc1d8b	-0.356063	0.675145		0.122353	0.0238386	0.0578126	0.0531811
Rcan1	-0.245928	0.0519255	0.354213	9.07171	8.39623	7.82681	6.86047
Camta1	0.248918	0.235572	0.672053	0.580055	0.64329	0.754569	0.690297
Ess2	-0.043083	0.67577	0.915729	10.5742	10.6599	10.5525	10.0072
Ccnd3	0.212538	0.00202366	0.0539817	57.1371	57.4759	65.355	67.0982
Xlr4a	-0.0321455	0.971065		0.31958	0.163446	0.262072	0.23727
Xlr3b	0.326587	0.498761	0.854486	0.50164	0.578621	0.673946	0.676822
Rgs3	-0.791127	0.320755		0.128945	0.10112	0.0852983	0.0495567
Nacad	-0.246919	0.759283		0.0737178	0.0825857	0.0506647	0.080947
Tex264	-0.206928	0.143102	0.558377	10.1573	10.2667	8.46845	9.18172
Dact3	-0.570398	0.00525073	0.100796	2.3932	2.8518	1.75334	1.77416
Neurl1b	-0.644565	0.247057	0.686159	0.155953	0.134333	0.0888493	0.0946363
Fam90a1a	-2.85581	0.0245246		0.218823	0.158546	0.0328984	0.0175206
Klhl34	0.567469	0.436732		0.0914891	0.187165	0.2299	0.182086
Nup62cl	-0.10698	0.667098	0.912563	3.59089	3.84571	3.1146	3.78928
Fam43b	0.69191	0.44004		0.072509	0.111252	0.196221	0.111468
Zfp800	0.600699	0.217524	0.651448	0.166933	0.212399	0.326874	0.246453
Tomt	-0.0360287	0.879639	0.974762	3.34399	3.34216	2.91284	3.60535
Zfp72	0.291098	0.337379	0.765364	1.00289	0.583502	1.10385	0.835402
Gnb1l	-0.167435	0.304979	0.739957	2.77862	3.075	2.74172	2.46471
Zbtb21	0.0338271	0.755077	0.936857	4.53375	4.41323	4.78053	4.36168
Dnmt3l	-0.810492	5.01298e-29	5.6937e-26	114.625	120.364	64.2548	69.3792
Zfp664	0.0935691	0.337052	0.765246	9.89656	9.29627	10.8296	9.60172
Nckap5	0.150981	0.793713	0.947024	0.0833945	0.0950513	0.118213	0.0847047
Akap17b	-0.218594	0.319309	0.751213	0.848129	0.887509	0.747443	0.745195
Clasp2	0.101846	0.376708	0.793377	3.77166	3.94891	4.26526	4.00096
Sap25	0.237672	0.0943048	0.47246	12.0053	14.0863	14.79	15.8778
Jcad	-0.117825	0.669057	0.913528	0.555653	0.448435	0.50123	0.423672
Apol8	0.583054	0.410717		0.140188	0.136877	0.178189	0.22653
Mfap1b	-0.0925898	0.806765	0.951029	1.38735	0.765565	0.848036	1.16636
Rnf144a	0.408925	0.151019	0.571012	0.627844	0.519883	0.614295	0.900069
Mecp2	0.19534	0.194658	0.626097	1.2293	1.03048	1.34164	1.23796
Nfix	-0.344152	0.351201	0.776694	0.319225	0.377749	0.268197	0.273637
Tmsb15b1	-0.415815	0.267078	0.708405	5.5294	3.71674	3.45585	3.4912
Popdc2	0.138067	0.901645		0.0864127	0.0642834	0.11338	0.0603826
Slc25a53	0.226285	0.639486	0.90689	0.253185	0.308569	0.335291	0.33125
Sh3d19	-0.125433	0.373497	0.792895	1.98979	1.96002	1.90628	1.7042
Ndor1	-0.0774576	0.407182	0.809652	10.3837	11.8084	10.5441	10.4388
Efr3b	-0.380017	0.137833	0.5501	0.630769	0.610251	0.488381	0.464637
Snx27	0.0816132	0.419425	0.815312	5.70952	5.54123	6.14238	5.72125
Zfp266	0.260037	0.01552	0.191404	3.7381	3.80685	4.50828	4.50524
Pigyl	-0.0579646	0.713959	0.926292	16.0932	16.2317	16.7676	14.2159
Mrtfa	0.0076512	0.958028	0.990251	2.88259	3.13485	3.17531	2.86473
Spint2	-0.184241	0.0173926	0.203216	73.5691	79.5774	66.9065	67.5102
Trim21	0.195559	0.468804	0.84166	1.15033	1.09906	1.1973	1.37245
Itgam	0.484795	0.53235		0.0442352	0.0980357	0.109732	0.0920867
Snrpn	-0.426688	6.81279e-08	1.04331e-05	46.5814	45.5935	32.8877	35.4918
Neurl2	0.0867585	0.78476	0.94507	1.94921	1.94814	2.24149	1.88711
Sdr39u1	0.0314833	0.811615	0.952833	12.7398	14.4553	13.9274	13.7807
Tc2n	-0.878164	0.312769		0.0780177	0.0798026	0.0263911	0.0593434
Pja1	0.154594	0.164237	0.587258	8.28446	8.44798	9.48038	9.11434
Pphln1	-0.163182	0.138876	0.551669	7.26257	6.74106	6.25421	6.21335
Terf2	0.0811233	0.392629	0.803204	14.9114	15.9154	16.3485	16.1815
Ptpru	-0.224957	0.413143	0.812199	0.604686	0.612111	0.50872	0.526802
Enah	-0.00103487	0.988302	0.997147	17.2949	18.2854	17.0763	18.3819
Lhx6	0.416693	0.422271	0.816881	0.244364	0.213503	0.362791	0.234787
Lig1	-0.090346	0.176094	0.602933	75.6101	80.8567	72.5878	73.9965
St7	-0.00805961	0.984306	0.996799	0.638897	0.653514	0.541179	0.74112
Pdgfra	-1.18547	0.0799759		0.149235	0.0883762	0.061405	0.0402489
Slc35a4	0.150464	0.0845666	0.451823	16.3623	16.2869	18.2839	17.8513
Etv3	0.246518	0.140069	0.553291	1.80556	1.58742	2.1104	1.89834
Ubp1	0.0492893	0.539261	0.871797	14.9315	14.0503	15.0379	14.8613
Mtg2	0.0955763	0.447671	0.830197	11.4643	11.8285	11.7988	13.0032
Nup88	-0.0795265	0.304596	0.739422	38.2165	36.4033	34.0282	36.3782
Bin1	-0.0555934	0.817618	0.95492	1.96248	2.25726	2.23303	1.82297
Mboat2	-0.273391	0.228436	0.662512	1.84156	1.9228	1.56347	1.54898
Disp3	-0.113397	0.884832		0.0395595	0.0505807	0.0339006	0.0456109
Tns3	0.314881	8.1413e-05	0.00456633	9.56682	10.3388	12.7226	11.9751
Cacna1d	0.192869	0.828296		0.0342328	0.0272347	0.0497509	0.0201002
Ttll9	0.0573457	0.916521	0.981108	0.199452	0.336025	0.291042	0.259271
Greb1l	-0.728383	0.010956	0.157184	0.425156	0.432792	0.250759	0.267092
Rusc1	-0.114761	0.649356	0.908876	1.08727	1.3941	1.20641	1.07409
Prr5l	-0.290802	0.48556	0.850252	0.428028	0.355985	0.223724	0.422784
1600012H06Rik	0.0859148	0.54694	0.875355	5.44402	5.267	6.08594	5.25701
Pars2	0.176105	0.227037	0.660843	3.69262	3.95398	4.41275	4.20711
Ndufv3	-0.359388	0.00701074	0.120621	39.3321	47.4709	34.4211	33.0412
Liph	-0.425483	0.0015698	0.045626	4.65964	4.5904	3.29323	3.57292
Mfsd14b	0.147578	0.242439	0.680251	5.17295	4.75382	5.54524	5.43096
Slc12a8	0.0745377	0.682933	0.91862	2.80431	2.64782	3.2581	2.47651
Sbsn	-0.653944	0.409617		0.495818	0.748667	0.404659	0.340276
Fetub	0.248874	0.459345	0.836685	1.30072	1.56759	1.76579	1.62095
Nr3c2	-0.320174	0.695877		0.0822482	0.0498548	0.0494616	0.0585369
Plekhg2	-0.0833004	0.592068	0.892717	2.26367	2.79319	2.3833	2.37148
Kdf1	-0.0172144	0.939033	0.986615	2.52808	2.88957	2.63463	2.73262
Scn3b	-0.0948494	0.858201	0.9683	0.190365	0.215886	0.220249	0.159047
Zfp991	-0.517637	0.00124672	0.0386865	4.60508	5.2402	3.15774	3.70515
Rbck1	0.115998	0.159793	0.581556	24.1544	25.2515	27.2714	26.1174
Wbp1	-0.0147177	0.925505	0.983109	7.77954	7.98427	7.96111	7.57514
Oas1b	-0.923992	0.204701		0.431814	0.220847	0.19476	0.153329
Tle3	-0.190022	0.0442226	0.328025	8.28268	8.46879	7.66844	6.98516
Myom1	-0.0368751	0.964877		0.0779143	0.0464898	0.0556407	0.0592647
Pth1r	-0.775465	0.0189246	0.213936	1.38373	1.13708	0.792396	0.679687
Slc35a2	-0.10585	0.570874	0.88375	2.9981	3.04484	2.77511	2.82586
Rnaset2a	0.381084	0.244727	0.683225	3.6478	1.75695	3.37039	3.60692
Rsph3b	0.487712	0.374896	0.793377	0.448833	0.338861	0.49163	0.626328
Zfp655	-0.0295336	0.910958	0.979578	1.93098	1.98528	1.8669	1.96947
Tcf4	0.32237	0.0310721	0.274375	1.86521	1.49623	2.15206	2.04217
Arid1b	0.109729	0.451516	0.832924	1.148	1.29681	1.4227	1.20792
Speg	-0.4367	0.221364	0.655683	0.21766	0.208391	0.15079	0.158938
Mcc	0.511322	0.0111371	0.158642	0.684596	0.613006	0.889814	0.951973
Myh7b	-0.140923	0.642071	0.90767	0.405441	0.573116	0.401287	0.489644
Anxa9	-0.117355	0.769529	0.941623	0.73765	0.877137	0.731941	0.744177
1600014C10Rik	-0.210802	0.469942	0.842108	0.998313	0.81587	0.835546	0.731751
Dusp5	0.217816	0.186683	0.616	4.9841	5.39859	6.53876	5.50799
Entr1	0.0749862	0.363072	0.785163	29.0321	29.136	31.6011	29.5056
Steap3	-0.863629	1.91934e-07	2.58217e-05	3.83478	3.95061	2.20535	2.06923
Pramel24	-2.55431	0.0034593		0.301436	0.341666	0.0440939	0.0547934
Zfp467	-1.38019	0.0353458	0.291437	0.27876	0.263618	0.142334	0.0656955
Tspyl5	0.183015	0.705483	0.923934	0.256732	0.218838	0.324221	0.213781
Smcr8	0.234405	0.0391126	0.307254	3.22542	3.11645	3.97912	3.45796
Ctnnd1	-0.0248691	0.760447	0.937858	17.8464	15.6417	16.4004	16.4194
Acin1	-0.0869653	0.208484	0.642224	67.1549	69.6724	66.5027	62.0026
Rere	-0.111485	0.24789	0.68678	5.08723	5.3593	4.73457	4.90779
Ndufaf6	0.0296885	0.871007	0.971965	6.65799	7.66161	7.5651	7.01216
Arfgef2	0.115176	0.243124	0.681662	3.92863	4.14296	4.56167	4.15929
Slc25a43	-0.183889	0.74011	0.932329	0.596334	0.652534	0.575456	0.532988
Chmp6	0.0489016	0.676137	0.915863	14.3561	13.6446	13.8771	15.0465
Cisd3	0.169753	0.220513	0.654279	17.0958	18.8553	19.9618	20.347
Zbtb34	0.107649	0.467417	0.840641	2.00591	2.57804	2.39305	2.53394
Tmem8b	0.632933	0.111133	0.508157	0.298952	0.239476	0.506852	0.325303
Myom3	-0.0462808	0.955861		0.0680818	0.0538123	0.0697881	0.0475735
Fam131c	-0.257465	0.281872	0.719995	3.07146	3.58883	3.04769	2.50843
Myorg	0.728884	0.00327946	0.0746201	0.801372	0.655765	1.23075	1.18456
Pramel19	-2.92172	4.8562e-07	5.83646e-05	1.07724	1.41671	0.234924	0.0909909
Syndig1	0.370627	0.60001		0.108753	0.359394	0.271665	0.32151
Zfp992	-0.596298	4.81216e-05	0.00295438	4.00503	4.37262	2.68544	2.84694
Fthl17c	-0.906083	0.340811		0.408609	0.376161	0.202723	0.196297
Slc2a7	-0.0740122	0.900868	0.978489	0.310387	0.277802	0.244988	0.313134
Gm14393	0.112132	0.88403		0.411387	0.785492	0.766927	0.527019
Tcp11	-0.371764	0.130713	0.540439	2.47978	3.43592	2.45079	2.10732
Mpzl3	-0.113507	0.789864	0.945831	0.415755	0.353535	0.338886	0.370584
Ptchd1	0.178229	0.853109		0.0343669	0.0378572	0.0429242	0.03556
Srsf11	0.0107722	0.879824	0.974762	57.7234	58.1042	55.9471	60.417
Dennd2d	-0.346063	0.684097		0.110424	0.0695076	0.091946	0.0489673
Ogfod1	0.115064	0.346585	0.774003	4.05643	3.52498	4.13184	4.06635
Trappc13	0.0344568	0.729013	0.930144	12.4032	10.6511	12.0466	11.4973
Myadm	0.104013	0.292791	0.728942	15.4613	13.185	15.0138	15.6898
C1s1	-0.218308	0.587438	0.890951	0.858241	0.514617	0.416456	0.756361
Kif26a	0.412274	0.131397	0.541344	0.44716	0.518376	0.782076	0.501241
Trerf1	-0.5406	0.000794001	0.0276773	1.77698	2.29933	1.45854	1.33734
Ccnyl1	0.0765553	0.518194	0.862876	6.70228	6.72321	7.18705	6.93149
Hic1	0.118629	0.772807	0.942419	0.370906	0.44985	0.492306	0.397097
Bhlhb9	0.27328	0.02665	0.25365	6.62327	6.18161	7.36219	8.06458
Tead3	-0.414206	0.21737	0.651202	1.07704	0.93607	0.8509	0.642541
Sdcbp	0.207759	0.472571	0.84421	7.92997	5.31793	7.20801	8.04678
Purg	0.174318	0.659494	0.910732	0.994243	0.713849	1.14695	0.780755
Zbtb3	0.0865039	0.683744	0.918937	2.57928	2.55093	2.76579	2.65873
Tmem176a	-1.5308	0.00612804	0.110919	1.29883	1.2761	0.632056	0.279141
Grsf1	0.298912	0.000898249	0.0304844	17.2548	16.0873	20.5437	20.3529
Yy2	-0.0123216	0.951761	0.988924	2.5197	1.95291	2.20272	2.21968
Ndufa4l2	-0.780624	0.260271		0.67992	0.585664	0.306663	0.395402
Ptrh2	-0.01678	0.865015	0.970108	11.7689	12.0739	11.4037	12.1018
Atxn7l3	0.201231	0.0204495	0.222598	18.4736	18.1222	22.5568	19.4179
Pik3c2b	0.216692	0.414376	0.812916	0.432111	0.42645	0.579785	0.419349
Zfp541	-0.614976	0.447561		0.092236	0.0867985	0.0599054	0.0567175
Arhgap44	-0.544578	0.0367348	0.296253	1.01133	1.052	0.718995	0.687595
Fam110d	0.345562	0.189448	0.618829	2.27239	2.99874	3.22657	3.42325
Duox1	1.38476	0.0360698		0.0655242	0.0536187	0.162543	0.144799
Scn2a	0.275519	0.800138		0.0234009	0.0159575	0.0175907	0.031852
Ajap1	1.56544	0.201841		0.0448281	0.0114634	0.0909841	0.0753746
Shisal2a	-0.475082	0.603427		0.172562	0.823712	0.536163	0.165799
Ctag2l1	-0.599908	0.37176		0.935471	0.985017	0.570837	0.687324
Msmp	0.614335	0.136991	0.548856	1.97425	1.21165	2.74465	2.09772
Tmem35b	-0.498584	0.390219	0.802238	0.58951	0.834919	0.436324	0.566406
Zkscan16	0.383832	0.522643	0.864783	0.0632066	0.096979	0.12061	0.0887583
Gm14305	-0.406195	0.584997		0.318411	0.347409	0.105316	0.387514
R3hdml	-0.450507	0.568381		0.378461	0.38712	0.256045	0.287873
Rapgef2	0.0951417	0.688664	0.920735	0.713449	0.614403	0.77607	0.635084
Sh2d5	-0.164424	0.616436	0.899803	0.684988	0.812765	0.711817	0.605491
Rnf39	0.458137	0.243702	0.68211	0.987996	0.779258	1.19188	1.22376
Myof	-0.31599	0.0322702	0.279078	1.90674	1.95285	1.48494	1.60739
Myh3	-0.302112	0.359517	0.78263	0.354406	0.598296	0.42106	0.357126
Pnma8b	-0.0989881	0.828561	0.958954	0.322637	0.245399	0.305961	0.222559
Cep170	0.215073	0.255135	0.694901	0.947874	0.923874	1.14825	1.02039
Htr3a	0.479471	0.619333		0.133524	0.0597532	0.112918	0.160364
Npw	-0.677979	0.27352	0.713961	1.10361	0.912693	0.55071	0.721944
Rbis	-0.329248	0.129244	0.538445	14.7544	14.4261	10.9606	12.1331
Tomm5	-0.0270327	0.750877	0.935034	82.4782	83.2277	80.345	81.7995
Dnajc28	0.242234	0.684728	0.919303	0.22816	0.119173	0.210192	0.205225
Pklr	-1.21605	0.144095		0.22009	0.145669	0.0700706	0.0870736
D3Ertd751e	0.255695	0.350538	0.776694	0.765362	0.981133	0.999734	1.06485
Trmt61a	0.137436	0.213282	0.647783	11.6318	12.7725	13.0101	13.7567
Smim24	0.0502744	0.953722		0.512125	0.554656	0.434791	0.636776
Srp54b	0.310824	0.124899	0.531662	1.72565	1.55053	2.0487	2.00071
Srp54c	0.288475	0.156461	0.578458	1.30313	1.17709	1.52633	1.49476
Cyp2t4	0.337159	0.767478		0.0913585	0.140173	0.23693	0.043889
Zscan4d	-2.67906	1.6934e-83	2.30802e-79	16.8649	18.8399	2.67825	2.87757
Taf4b	0.149316	0.253432	0.693328	2.25108	2.21334	2.39489	2.55088
Msl2	0.246993	0.0214437	0.228336	4.97669	4.83566	5.95189	5.66176
Bicral	0.289485	0.00389222	0.0836075	5.24207	4.876	6.52306	5.80917
Wfikkn1	0.0302497	0.955268	0.98932	0.264022	0.346234	0.341977	0.279693
Fam169a	0.33777	2.65803e-06	0.000258906	20.1207	19.963	24.8847	25.6383
Zbtb42	-0.252225	0.597074	0.893657	0.379927	0.373479	0.436183	0.18963
Pnma5	-0.231625	0.209529	0.642863	4.12198	3.64029	2.95293	3.62859
Rc3h2	0.126129	0.335498	0.764393	2.013	1.71784	2.02509	2.03541
Adat3	0.0739828	0.680478	0.917368	5.28732	6.52982	6.11017	6.29745
Psmg4	-0.0776293	0.666186	0.912404	17.8905	26.2521	20.1094	21.5991
Mkrn2os	-0.569564	0.575863		0.0744384	0.124595	0.0732519	0.0650191
Zcchc24	-0.267201	0.16683	0.590676	1.51168	1.64578	1.33324	1.27987
Prrt4	0.273568	0.710973		0.0905873	0.133842	0.15435	0.116049
Cyp4f17	-0.118024	0.643091	0.908028	1.39316	1.25667	1.29382	1.12394
S100a7l2	-0.231782	0.831113		0.529047	0.288614	0.318153	0.40665
Foxi3	-0.646109	0.117485	0.51871	2.12482	1.18153	1.20919	0.876904
Akap5	-0.16012	0.720323	0.927274	0.192424	0.167959	0.175891	0.147906
Zfp267	0.0234954	0.887572	0.975239	1.33369	1.5046	1.47404	1.40334
Pabpc4l	-0.809422	0.174624	0.601777	0.197251	0.134509	0.11269	0.0758083
Gm4984	0.210671	0.663587	0.911732	2.01484	1.29193	2.11589	1.76251
Zfp703	-0.474988	0.27481	0.715273	0.519592	0.4429	0.429642	0.260015
Clec2l	0.0790613	0.878098	0.974621	0.530387	0.653492	0.598048	0.625418
Susd5	0.594285	0.415114		0.106384	0.0816135	0.0959643	0.183135
Ccdc8	-0.00881554	0.976521	0.994834	0.911409	0.670063	0.873525	0.693254
Rpl32l	-0.0346131	0.830803	0.959217	20.6334	20.5994	17.5361	22.565
Cyp4f40	-0.585968	0.588256		0.139757	0.0500339	0.0567306	0.0738536
Isoc2a	0.0785377	0.518694	0.863351	18.142	20.6532	21.0797	19.7815
Acp5	0.122862	0.656655	0.910373	2.15489	2.17914	2.13158	2.57628
Rbm8a	-0.0375464	0.555792	0.879212	72.7381	70.4357	70.0485	69.0538
Kng1	0.554084	0.556056		0.0824453	0.0919981	0.108175	0.158428
Stx16	0.0584015	0.566147	0.881914	8.29365	8.69112	8.58459	9.04617
Arfgef1	0.0355244	0.795194	0.947419	2.49455	2.83207	2.47546	2.97775
Acbd5	0.0816774	0.676864	0.915909	1.66237	1.81801	1.81502	1.8688
Aplp2	0.0103184	0.883064	0.975049	31.6495	30.1294	31.0761	30.9742
Azin1	0.087912	0.381117	0.796266	14.3099	11.3356	13.4049	13.7557
Calml4	-0.76901	0.00159784	0.0462372	7.14014	7.18054	4.18543	4.20396
Cnnm2	-0.0149974	0.905551	0.978845	5.40828	5.20882	5.18733	5.30257
Prrt2	0.113935	0.726344	0.929397	0.938484	0.776435	0.890137	0.961375
Alkbh1	0.204236	0.0393491	0.308578	15.4624	15.6806	18.2199	17.573
Col6a6	0.709785	0.413342		0.0218544	0.0471926	0.061332	0.0513282
Smyd4	0.123972	0.347469	0.774651	4.47118	4.12313	4.67309	4.66255
Phldb3	-0.420505	0.453261	0.833887	0.378392	0.410272	0.204798	0.370833
Kif19a	0.450025	0.601488		0.0502525	0.113085	0.140525	0.0724246
Nt5c3b	0.0195127	0.869604	0.971537	14.1371	15.0375	14.8982	14.5844
Steap2	-0.00850614	0.960937	0.991421	1.0003	0.870472	0.834988	1.01848
Zfp980	0.194621	0.123737	0.530171	5.85716	6.0484	6.02884	7.55861
Pcbp2	-0.0220406	0.739231	0.931992	181.572	174.294	166.977	182.422
Zglp1	-0.399607	0.159695	0.581556	3.26416	3.30388	2.42031	2.57795
Ablim1	-0.0839956	0.854711	0.96717	0.164197	0.178132	0.195242	0.124297
Brwd1	0.236559	0.105434	0.495266	1.56015	1.50472	1.89157	1.71409
Tulp4	-0.219918	0.365852	0.786992	0.498447	0.48406	0.444378	0.395056
Lin9	0.239233	0.193875	0.625238	2.22513	2.06405	2.6123	2.4366
Cyp2c69	-0.616873	0.366285		0.360558	0.328936	0.210969	0.22471
Med7	0.0320236	0.740241	0.932364	15.6906	15.2856	15.2679	16.3176
Rdx	0.230371	0.00794205	0.130574	16.3547	14.2646	17.6279	18.1914
AW209491	0.1657	0.269104	0.710512	6.10857	5.41643	6.49111	6.41277
Tfe3	-0.0580988	0.451294	0.832823	30.0486	28.0655	28.8926	26.7796
Pcdh19	-0.253536	0.558772	0.880152	0.144981	0.115911	0.118755	0.0992708
Tmc5	0.866561	0.364192		0.0274258	0.0701332	0.119575	0.0658774
Zfp938	0.0948273	0.657552	0.910514	2.60715	2.43302	2.63431	2.73269
Gm11545	-1.97428	0.00403002		0.261648	0.437353	0.103619	0.0674471
Dtymk	-0.147518	0.0392135	0.30778	145.803	140.971	124.692	133.491
Kif21a	0.252001	0.368729	0.789166	0.473763	0.399729	0.550499	0.480913
Zfp185	-0.0888374	0.605836	0.896945	2.7744	2.68904	2.31015	2.81013
Cdk12	0.119168	0.211638	0.646141	5.50541	5.07923	6.01074	5.44674
Gas7	0.00151025	0.997268	0.999636	0.164423	0.170658	0.183217	0.148686
Bach2	0.258788	0.698139		0.0666577	0.0454552	0.0692394	0.0640453
Kazn	-0.167441	0.181922	0.610818	5.35285	5.44455	4.79239	4.79634
C2cd5	0.111975	0.292736	0.728923	6.17929	5.9113	6.43689	6.59081
Phf21a	0.057247	0.70247	0.92339	1.78878	1.93685	1.85101	2.01286
Cnbp	0.172174	0.00468851	0.0937865	180.102	173.784	194.932	202.673
Cenpw	-0.32611	0.0148038	0.18672	12.4094	12.8446	10.9375	9.15814
Tomm40	0.118833	0.10253	0.489812	119.429	132.681	134.293	138.78
Dgcr2	-4.41577e-07	0.999996	0.999996	11.5147	11.6399	11.4652	11.6316
Dlg4	-0.122942	0.658306	0.910574	0.920783	1.19727	1.07461	0.854706
Atp7a	0.206621	0.369483	0.789569	0.526419	0.532027	0.559993	0.66095
Bcan	-0.603326	0.422929		0.160198	0.20319	0.115606	0.123135
Capn3	0.161864	0.289633	0.725686	4.0018	3.94499	4.50784	4.36438
Cbfa2t3	-0.524887	0.406645		0.0828507	0.0984888	0.0504972	0.0796036
Trpc2	-0.371153	0.375138	0.793377	0.422475	0.51119	0.418275	0.297013
Rnft2	-0.487969	0.151236	0.571227	0.597349	0.542225	0.346143	0.475114
Stau1	0.0280878	0.787217	0.94507	8.74313	8.28125	9.0845	8.22546
Srrt	-0.143593	0.0388836	0.306426	74.1939	80.9202	69.479	70.59
Hnrnpm	0.0149453	0.823205	0.957097	125.604	136.125	130.448	133.322
Sec61g	0.318989	0.424462	0.817834	1.70746	1.79189	1.80026	2.53538
Mdfi	-0.31468	0.318728	0.750534	1.37813	1.84182	1.30667	1.28546
Synpo	-0.183895	0.802361		0.107252	0.101869	0.124389	0.0588848
Nos1ap	-0.679693	0.565398		0.0480914	0.0351369	0.0123946	0.0429061
Nrep	-0.0878885	0.698032	0.922714	2.29808	2.2782	1.9665	2.34412
Col18a1	-0.333319	3.12011e-07	3.93756e-05	33.7881	34.5675	27.0735	27.0321
Ptpn11	0.182813	0.0421231	0.320199	7.18693	7.25711	8.28661	8.06499
Eftud2	0.0435016	0.492031	0.852693	71.3046	72.66	72.8828	75.0918
Apoc1	0.109741	0.672902	0.914666	9.5765	7.24381	9.47335	8.62128
Wdr36	0.040739	0.605807	0.896945	26.3119	24.3722	25.3161	26.6666
Dzip3	0.123202	0.334437	0.763508	2.9485	3.43552	3.48551	3.4498
Banp	0.113967	0.368979	0.789569	3.33865	3.09147	3.65862	3.271
Lsm2	-0.0184119	0.830652	0.959217	58.909	56.7745	57.0002	56.9254
Ppih	0.123503	0.537572	0.870822	2.61236	3.19371	3.01461	3.28633
Atp2a2	0.0505055	0.431173	0.822183	39.1759	39.5204	40.5573	40.7249
Cul4b	-0.100377	0.187736	0.616864	31.2295	29.3232	26.6986	29.6127
Ssb	0.125969	0.123145	0.529346	82.9926	69.7135	81.6319	84.4949
Prg4	0.182028	0.437324	0.824231	2.08994	2.91597	2.92708	2.74783
Tnk2	0.120373	0.167165	0.591413	21.4972	25.0616	26.2718	24.223
Mgat1	0.348713	0.0262566	0.252551	2.88681	3.30943	3.87662	4.00351
Nxt1	-0.0232052	0.82372	0.95711	29.7487	31.1667	28.5112	31.2764
Lrrc61	0.550242	0.00906183	0.14067	1.75445	1.6112	2.55875	2.35013
Cdca2	0.0493466	0.566662	0.882003	15.0444	16.0852	15.6077	16.521
Inpp5d	-0.391338	1.17482e-05	0.000925562	14.5637	13.6001	11.4266	9.98966
Echdc1	0.200552	0.23946	0.677402	2.99882	2.61985	3.28402	3.15597
Rnf146	0.197216	0.0863144	0.456357	5.08544	4.67231	5.72795	5.42904
Yif1b	-0.0597729	0.524515	0.865429	40.3312	44.2463	39.3909	41.5906
Acvr1	0.0137711	0.957616	0.990087	1.38883	0.988017	1.23868	1.14377
Akt2	-0.0677593	0.480606	0.848171	8.50243	8.54206	7.85406	8.36198
Lnpk	0.118987	0.424562	0.817834	1.32291	1.27311	1.46873	1.34252
Anxa6	-0.2617	0.0018184	0.0506793	27.256	29.4092	23.0314	24.1237
Gigyf2	0.0072695	0.942536	0.98692	5.69565	6.2355	6.03935	5.91786
Dclre1c	0.303142	0.386219	0.799368	0.436303	0.484267	0.544298	0.584209
Ppm1h	0.0605551	0.892099	0.975597	0.207038	0.184272	0.264374	0.147255
Celf2	-1.01336	0.0292191	0.266471	0.2001	0.195479	0.0811241	0.11233
Bex3	-0.0881958	0.212709	0.647629	186.428	196.229	173.934	185.032
Acp1	0.103073	0.582982	0.889583	2.25119	2.14994	2.25522	2.46588
Ndufaf8	-0.0707028	0.714258	0.926292	13.8111	15.884	13.1856	15.0548
Hmbs	0.0248028	0.794243	0.947287	29.4508	28.7191	27.8971	31.1316
Hpn	-0.69755	0.00611255	0.110712	2.39049	2.70108	1.471	1.65584
Fyco1	-0.0368701	0.861621	0.968671	0.678327	0.794271	0.734668	0.698907
Zfp945	0.243673	0.131381	0.541344	1.38925	1.39402	1.58673	1.70023
Ttk	0.117327	0.204629	0.638354	13.9909	14.1088	15.3645	15.0356
Abhd14a	-0.110489	0.375185	0.793377	13.8255	14.0266	13.442	12.2618
Itsn1	-0.0768446	0.517965	0.862788	4.2427	4.94141	4.38382	4.30494
Ap1m2	0.0219838	0.879238	0.974762	8.23768	7.80613	7.48462	8.75501
Keap1	-0.193036	0.143569	0.559236	5.5486	5.00513	4.87878	4.32164
Zfp426	0.00402756	0.984455	0.996799	1.61453	1.72864	1.72861	1.61407
Snx12	-0.0340629	0.765294	0.939904	9.96182	10.2549	9.38848	10.3197
Kif1a	-0.547055	0.0324877	0.279716	0.531346	0.635513	0.452885	0.341688
Zscan4f	-2.84847	3.06403e-36	4.39592e-33	6.66652	6.38624	0.780322	1.0299
Cd72	0.0352198	0.950868	0.988833	0.494014	0.45831	0.642533	0.364268
Dmtf1	0.0438274	0.678819	0.916351	7.81851	7.60776	7.77518	8.08922
Fiz1	0.125747	0.121998	0.527528	30.0705	33.478	35.3406	33.8107
Eci2	-0.273507	0.0505164	0.350026	10.4374	11.507	8.95586	9.13152
Gprc5c	-0.768121	0.00752237	0.125414	0.872169	1.0202	0.510215	0.597377
Sin3a	0.101752	0.175492	0.602707	15.6521	16.1446	17.0881	16.9387
Tmem87a	0.08435	0.417387	0.814486	9.85231	9.50375	10.5444	9.90885
Ifnar2	-0.171108	0.494755	0.853114	4.27051	3.20436	3.17243	3.43585
Canx	0.0582634	0.396853	0.804615	51.9857	48.27	50.5059	53.5794
Capn1	-0.0289615	0.773073	0.942424	10.4943	11.0706	10.5246	10.5513
Efcab12	0.0511641	0.89786	0.977954	0.479142	0.683385	0.651362	0.557623
Mettl8	0.166473	0.262756	0.703722	5.33548	6.36303	6.43897	6.64959
Ebf4	-0.58386	0.586572		0.0387955	0.158732	0.0816565	0.0559125
Samd11	-0.109265	0.62195	0.900741	9.14721	12.3023	10.1655	9.68152
Adam11	0.000568581	0.998919	0.999833	0.226163	0.300393	0.298405	0.230272
Syn1	-0.394277	0.0422065	0.320333	2.43014	2.93516	1.85938	2.20981
Ank1	0.785327	0.475724		0.0125103	0.0213275	0.031974	0.0280466
Xlr3a	0.763775	0.0657989	0.39866	0.880107	0.56801	0.945125	1.49996
Sf1	-0.126487	0.0514286	0.352411	59.1263	62.5204	55.171	55.9715
Anxa7	0.0573755	0.510104	0.859039	17.4555	17.7312	17.8293	18.7001
Pclo	-0.889564	0.121151	0.525573	0.0406357	0.077935	0.0284081	0.0361148
Capn12	-0.351741	0.0227794	0.23619	4.67486	4.18174	3.50037	3.39955
Gpatch4	0.00191611	0.981968	0.996518	38.7099	41.3855	41.6701	38.3171
Foxp4	-0.0456723	0.616086	0.899803	11.0095	11.559	11.2088	10.5904
Ddx6	0.150398	0.0676126	0.402882	11.9781	11.2261	13.4863	12.1975
Rbfox2	0.050289	0.552145	0.877553	7.70176	8.07073	8.07331	8.22292
Dnpep	-0.104992	0.262212	0.703266	27.4239	29.7638	25.3986	27.6561
Nfya	0.130439	0.270603	0.711782	6.55246	5.77333	7.13128	6.31792
Cacna2d1	-0.0149242	0.962509	0.99171	0.288338	0.349203	0.310036	0.316931
Crem	0.178463	0.586104	0.890622	0.77816	1.02443	0.929425	1.11457
Nav2	-0.348688	0.00368576	0.0803895	2.26422	2.56911	2.00595	1.78225
Serac1	-0.0885818	0.562297	0.881182	2.07123	2.05925	2.04473	1.83156
Runx1	-0.646862	0.27342	0.713902	0.15135	0.133564	0.0696015	0.111202
Pigx	0.112166	0.443779	0.827908	11.8372	11.9823	12.7373	12.9426
Runx1t1	-0.166481	0.716906	0.926292	0.159452	0.160702	0.171333	0.119408
Kctd9	0.152157	0.384206	0.798192	3.60729	2.68351	3.81274	3.15083
Zfp661	0.293247	0.212985	0.64772	1.51993	1.33261	1.68445	1.80012
Serpinh1	-0.174271	0.0863679	0.456357	15.7789	14.8549	14.1584	12.9064
Cd151	-0.105506	0.327011	0.758897	19.2934	16.5856	16.6637	16.5992
Cd34	0.185644	0.607183	0.896945	1.0504	0.530498	0.834997	0.971382
Cd59a	-0.206282	0.661545	0.911083	0.663528	0.537311	0.498782	0.531269
Comt	-0.359481	0.0265114	0.253036	5.52097	4.92618	3.92987	4.18583
Reps1	-0.149294	0.101961	0.488722	18.0813	17.3242	15.6896	16.1551
Fkbp8	-0.0624498	0.379688	0.79543	133.98	148.8	135.808	134.323
Fxyd5	-1.02017	0.0141476	0.182166	1.89962	1.44213	0.96388	0.68444
Cdc25b	0.0326804	0.83678	0.961174	3.48402	3.81994	4.02604	3.42405
Uhrf1	-0.0167881	0.787038	0.94507	79.4771	75.2949	77.2069	75.3568
Lyn	-0.411894	0.373282	0.792895	0.353682	0.341392	0.260625	0.272814
Cdkn1a	-0.175271	0.615266	0.899803	31.6288	23.1063	28.9139	19.4352
Lipa	-0.122555	0.715576	0.926292	0.88721	0.640594	0.659081	0.729866
Uba3	0.0987372	0.278247	0.717504	15.9944	15.4942	16.647	16.9946
Zfp322a	0.395631	0.0093874	0.142717	2.1566	1.92752	2.78585	2.57836
Cmah	-0.00619458	0.995855		0.00881021	0.0270353	0.0254313	0.0101579
Atg16l2	-0.611894	0.0741774	0.422099	0.991372	1.60286	0.88706	0.791205
Ccnb1ip1	0.170666	0.163672	0.586966	12.5877	12.3854	13.321	14.715
Ccdc6	0.175871	0.0511702	0.351613	7.94725	7.50425	8.96248	8.44129
Lrrc10b	2.37458	0.0131798		0.0495886	0.0507232	0.328032	0.190581
Sprtn	0.226268	0.0618504	0.388296	4.15041	4.38727	4.77633	5.17629
Lrrc73	0.095971	0.883758		0.336345	0.395009	0.483195	0.311194
Ubap1l	0.186064	0.730508	0.930328	0.4887	0.587359	0.473896	0.751274
Ncoa7	0.0131587	0.963374	0.99179	0.960602	1.19951	1.02406	1.1507
Stau2	-0.119007	0.786336	0.94507	0.555962	0.396161	0.501509	0.372121
Eif2b3	-0.0511042	0.571693	0.884135	32.6026	34.3498	31.0449	33.441
Wdfy1	0.129633	0.349532	0.77595	3.51361	3.02592	3.76928	3.36865
Sco2	0.0579321	0.588089	0.891278	21.9041	23.1095	24.2833	22.4631
Caprin1	0.0934825	0.154419	0.575121	49.8572	46.0738	49.9758	52.0773
Xlr5b	-0.211938	0.834828		0.29001	0.124903	0.165224	0.205317
Tbc1d9	-0.0375817	0.781012	0.944638	2.70433	2.79329	2.86151	2.48242
Lrrfip1	-0.0849731	0.682087	0.918174	1.81174	1.50752	1.51574	1.60545
Ngef	-0.110129	0.901496		0.110695	0.0792594	0.0848751	0.0957211
Idh1	0.0482279	0.67605	0.915852	15.8748	14.1176	13.9459	16.9836
Nedd9	-0.350191	0.668298		0.0783723	0.114522	0.0336648	0.114744
Kcnip3	-0.670589	0.0522624	0.355711	0.816524	0.817179	0.519294	0.507965
Ngf	-0.491029	0.554053		0.322202	0.379009	0.261579	0.247659
Cyth1	0.127487	0.729929	0.930328	0.49947	0.52774	0.539669	0.585366
Cyth2	0.0640264	0.476032	0.846381	17.5645	16.6671	17.8463	17.8407
Abl1	-0.0800563	0.338683	0.7671	8.17854	8.26756	8.01121	7.51015
Tlk2	-0.0447587	0.602952	0.896176	9.33857	9.61328	9.33345	8.98767
Ifitm1	-0.559289	6.60934e-08	1.0387e-05	75.4652	90.7562	55.0261	57.4775
Arhgef10l	0.383931	0.0023166	0.0591274	3.61236	4.08605	4.87726	5.14245
Aldh3a1	0.52502	0.0481921	0.343117	1.72278	1.97277	2.37505	2.93575
Zfp607b	0.175401	0.397941	0.805316	1.09879	1.21156	1.30028	1.30624
Atp5f1c	0.0301649	0.686007	0.91965	102.31	103.052	98.5329	110.551
Arhgef16	-0.338683	0.106562	0.497905	2.59656	2.33777	1.73521	2.14101
Bicd1	0.221599	0.36708	0.788489	0.372244	0.37893	0.442332	0.431594
Slc8a1	-0.756229	0.420555		0.0184691	0.0188916	0.0174931	0.00532357
Cacna1g	-0.337525	0.59837		0.0633527	0.090723	0.0647673	0.0568118
Bub1	-0.0316448	0.678313	0.916277	18.1314	18.2533	17.5825	17.9252
Gria4	1.19369	0.160049		0.0284369	0.0517111	0.102607	0.0728598
Fxr1	0.119081	0.0890008	0.461054	57.7566	54.7669	59.71	62.1636
Mitf	0.218339	0.498478	0.854323	0.372481	0.61823	0.592751	0.557081
Naca	-0.0491476	0.518311	0.862914	19.7673	21.1758	18.9277	20.5404
Nfib	0.362794	0.17621	0.603052	0.393836	0.292633	0.403858	0.47657
Nemp1	0.0480466	0.768346	0.941037	1.57103	1.6743	1.59527	1.74866
Odf2	-0.0347989	0.62021	0.900325	34.733	35.609	33.4398	35.0446
Chn1	-0.0114801	0.920757	0.982383	5.53954	5.25782	5.43765	5.24488
Sin3b	-0.180146	0.0383598	0.304588	86.5974	100.048	80.3947	83.9492
[truncated: 13,003 more rows]
