# Supplementary material for: Lamin A/C-regulated cysteine catabolic flux modulates stem cell fate through epigenome reprogramming
Source: Springer Nature journal article supplement (doi:10.1038/s42255-025-01443-2), 2026-01-28
Supplement: MOESM7 [file 42255_2025_1443_MOESM7_ESM.xlsx]

## Sheet: Real-time PCR primers
Supplemental Table 5a. Primers used for real-time PCR: qPCR primers were designed in-house using Primer3 and synthesized by Sigma-Aldrich.
Genes	Sequence of oligos
qmAfp_for	CTCAGCGAGGAGAAATGGTC
qmAfp_rev	GAGTTCACAGGGCTTGCTTC
qmAtp2a3_for	TGGGTAAGGTGATCCGGTCT
qmAtp2a3_rev	GTACCTTGTCTCCCACTGCC
qmBmp4_for	TTCCTGGTAACCGAATGCTGA
qmBmp4_rev	CCTGAATCTCGGCGACTTTTT
qmBrachyury_for	AGGGAGACCCCACCGAACGC
qmBrachyury_rev	CCGGGAACATCCTCCTGCCGTT
qmCalca_for	TCCTGGTTGTCAGCATCTTG
qmCalca_rev	GCATATAGTCCTGCACCAGTG
qmCbs_for	CACGAGCAGATCCAATCACG
qmCbs_rev	TAGCAGGTCAATGGCAGTGA
qmCcl2_for	TTAAAAACCTGGATCGGAACCAA
qmCcl2_rev	GCATTAGCTTCAGATTTACGGGT
qmCdkn1a_for	CCTGGTGATGTCCGACCTG
qmCdkn1a_rev	CCATGAGCGCATCGCAATC
qmCdkn2a_for	CGCAGGTTCTTGGTCACTGT
qmCdkn2a_rev	TGTTCACGAAAGCCAGAGCG
qmCstc_for	TCCGGGCTCTTGGGTATTTT
qmCstc_rev	CAGATCAGGGTAGGTGCAGT
qmCth_for	TGAGAGTCTGGCTGAGCTTC
qmCth_rev	TCTAGGCCCACAGAAAGTCG
qmCxcl1_for	CTGGGATTCACCTCAAGAACATC
qmCxcl1_rev	CAGGGTCAAGGCAAGCCTC
qmDchs2_for	TCCTTGACGGCTCTCACATT
qmDchs2_rev	ACTCGGTGTGTGTGTTTTCG
qmEomes_for	CAGGGCAGGCGCATGTTTCCT
qmEomes_rev	TCCGCTTTGCCGCAGGTCAC
qmFoxa2_for	GGGAAATGAGAGGCTGAGTG
qmFoxa2_rev	GGTGAGACTGCTCCCTTGAG
qmGata4_for	TCTCACTATGGGCACAGCAG
qmGata4_rev	GCGATGTCTGAGTGACAGGA
qmGata6_for	CAAAAGCTTGCTCCGGTAAC
qmGata6_rev	TGAGGTGGTCGCTTGTGTAG
qmHox_for	GGGCTGAGTGAAAAGTCCCA
qmHox_rev	AGGAACCACTGAAAGTCGCC
qmIL-1a_for	CGAAGACTACAGTTCTGCCATT
qmIL-1a_rev	GACGTTTCAGAGGTTCTCAGAG
qmIL-1b_for	GCAACTGTTCCTGAACTCAACT
qmIL-1b_rev	ATCTTTTGGGGTCCGTCAACT
qmIL-6_for	TAGTCCTTCCTACCCCAATTTCC
qmIL-6_rev	TTGGTCCTTAGCCACTCCTTC
qmIsl1_for	ACGTGCTTTGTTAGGGATGG
qmIsl1_rev	CAAGAAGTCGTTCTTGCTGA
qmKlf4_for	GGCGAGTCTGACATGGCTG
qmKlf4_rev	GCTGGACGCAGTGTCTTCTC
qmKlf5_for	CACCGGATCTAGACATGCCC
qmKlf5_rev	ACGTCTGTGGAACAGCAGAG
qmLmna_for	GGAAGTCGATGAAGAGGGAAAG
qmLmna_rev	TTTAGGGTGAACTTCGGTGG
qmMesp1_for	GTTTAAGCCCGGCCGTCTGCA
qmMesp1_rev	ATGTCGCTGCTGAAGAGCGGAGA
qmMesp2_for	TAGAAAGAGCCGCTGACTCC
qmMesp2_rev	CTAGGCTCTGGGGACATCTG
qmMlc2a_for	CCCATCAACTTCACCGTCTT
qmMlc2a_rev	CGTGGGTGATGATGTAGCAG
qmMlc2v_for	CTGCCCTAGGACGAGTGAAC
qmMlc2v_rev	CCTCTCTGCTTGTGTGGTCA
qmMmp10_for	GAGCCACTAGCCATCCTGG
qmMmp10_rev	CTGAGCAAGATCCATGCTTGG
qmMmp12_for	CTGCTCCCATGAATGACAGTG
qmMmp12_rev	AGTTGCTTCTAGCCCAAAGAAC
qmMycbp2_for	TGGGTGCAGCTGGATAAGAA
qmMycbp2_frev	TGAGAAAGGGCTTGGAGGAG
qmMyl4_for	CCCAATCAGCCATCCTAACTG
qmMyl4_rev	TTCTTAGGCTCGGGTTTCTTG
qmNkx2-5_for	AGCAACAGCGGTACCTGTC
qmNkx2-5_rev	GCTGTCGCTTGCACTTGTAG
qmProgerin_for	TGAGTACAACCTGCGCTCAC
qmProgerin_probe	CGGGAGCCCAGAGCTCCCAGAA
qmProgerin_rev	TGGCAGGTCCCAGATTACAT
qmSlc1a1_for	ATGTGTCTGGGAAGATTGGTC
qmSlc1a1_rev	TTTACCCGTCCTGTTGATGTC
qmSlc1a5_for	CATCTACTTCCTCTTCACCCG
qmSlc1a5_rev	CCACACCATTCTTCTCCTCTAC
qmSmarcd3_for	AGGGGAAGCTCTTGGATGAT
qmSmarcd3_rev	TTGTCTGGGCCATAAAGGTC
qmSox17_for	CCAGAAACTGCAGACCAGAAG
qmSox17_rev	AGATGTCTGGAGGTGCTGCT
qmSynapt_for	AGAACAACAAAGGGCCAATG
qmSynapt_rev	TCAGTGGCCATCTTCACATC
qmTh_for	TCAGTGATGCCAAGGACAAG
qmTh_rev	CAGGGTGTACGGGTCAAACT
qmTnfrsf1b_for	ACACCCTACAAACCGGAACC
qmTnfrsf1b_rev	AGCCTTCCTGTCATAGTATTCCT
qmTnnt2_for	ATCCCCGATGGAGAGAGAGT
qmTnnt2_rev	CTGTTCTCCTCCTCCTCACG
qmTtn_for	ACCACCCAACTTCAGTCAGC
qmTtn_rev	TCCCGGTAGAACTTCACCAC
qmTuba1a_for	CCGCGAAGCAGCAACCAT
qmTuba1a_rev	CCAGGTCTACGAACACTGCC
qmVim_for	TGCACGATGAAGAGATCCAGG
qmVim_rev	CTCCTGGAGGTTCTTGGCAG

## Sheet: ChIP qPCR primers
Supplemental Table 5b. Primers used for ChIP-qPCR: qPCR primers were designed in-house using Primer3 and synthesized by Sigma-Aldrich.
Target	Sequence of oligos
ChIP_CTH_promoter_for	TGCTGGAAACTAGGCAGGAA
ChIP_CTH_promoter_rev	CCTAGGGACCAGCGATGATT
ChIP_CBS_promoter_for	CCAGGTACAGAGGAAGCCAA
ChIP_CBS_promoter_rev	GTCCGAGTCTAGGTGAGCTC
ChIP_negtive_for	ATGTTCTGCCCAGCTCTTCT
ChIP_negtive_rev	AAGAGTCACTGTCAGGGAGC

## Sheet: Primary antibodies used for WB
Supplementary Table 5c: Primary antibodies used for WB in this study
Antidbodies	Company	Catalog number	Dilution
Rabbit monoclonal anti-CTH (D1N1D)	Cell Signaling Technology	Cat# 19689T	1:1000 for WB
Rabbit monoclonal anti-CBS (D8F2P)	Cell Signaling Technology	Cat# 14782T	1:1000 for WB
Mouse monoclonal anti-LaminA/C (E-1)	Santa Cruz	Cat# sc-376248	1:1000 for WB
Rabbit polyclonal anti-LaminB1	Abcam	Cat# ab16048	1:1000 for WB
Mouse monoclonal anti-LaminB1	Santa Cruz	Cat# sc-374015	1:1000 for WB
Rabbit monoclonal anti-Acetyl-Histone H3 (Lys9) (C5B11)	Cell Signaling Technology	Cat# 9649S	1:1000 for WB
Rabbit monoclonal anti-Acetyl-Histone H3 (Lys27) (D5E4)	Cell Signaling Technology	Cat# 8173	1:5000 for WB
Rabbit polyclonal anti-Histone H3ac (pan-acetyl)	Invitrogen	Cat# PA5-114693	1:5000 for WB
Rabbit polyclonal anti-Histone H3 (tri methyl K9)	Abcam	Cat# ab8898	1:5000 for WB
Rabbit polyclonal anti-Acetyl-Histone H3 (Lys56)	Cell Signaling Technology	Cat# 4243T	1:5000 for WB
Rabbit polyclonal anti-Acetyl-Histone H4 (Lys8)	Cell Signaling Technology	Cat# 2594T	1:1000 for WB
Rabbit polyclonal anti-Acetylated-Lysine	Cell Signaling Technology	Cat# 9441S	1:1000 for WB
Rabbit polyclonal anti-Histone H2B	Abcam	Cat# ab1790	1:5000 for WB
Rabbit polyclonal anti-Histone H3	Abcam	Cat# ab1791	1:5000 for WB
Rabbit monoclonal anti-Phospho-Histone H2A.X (Ser139) (20E3)	Cell Signaling Technology	Cat# 9718T	1:1000 for WB
Rabbit monoclonal anti-SUV39H1 (D11B6)	Cell Signaling Technology	Cat# 8729T	1:1000 for WB
Rabbit monoclonal anti-AHCYL1/IRBIT (D3A5G)	Cell Signaling Technology	Cat# 94248T	1:1000 for WB
Rabbit monoclonal anti-Thymidylate Synthase (D5B3)	Cell Signaling Technology	Cat# 9045T	1:1000 for WB
Rabbit monoclonal anti-MTHFD1L (D8T7L)	Cell Signaling Technology	Cat# 14999T	1:1000 for WB
Rabbit monoclonal anti-MTHFD2 (D8W9U)	Cell Signaling Technology	Cat# 41377T	1:1000 for WB
Rabbit monoclonal anti-SHMT1 (D3B3J)	Cell Signaling Technology	Cat# 80715T	1:1000 for WB
Rabbit monoclonal anti-MTHFR (D1E4V)	Cell Signaling Technology	Cat# 25164T	1:1000 for WB
Rabbit polyclonal anti-3-MPST	Sigma-Aldrich	Cat# HPA001240	1:1000 for WB
Rabbit polyclonal anti-α-Tubulin	Cell Signaling Technology	Cat# 2144S	1:1000 for WB
Mouse monoclonal Anti-phospho-Histone H2A.X (Ser139)	Millipore	Cat# 05-636-I	1:1000 for WB
Mouse monoclonal anti-SP1	Santa Cruz Biotechnology	Cat# sc-17824	1:1000 for WB

## Sheet: Primary antibodies used for IF
Supplementary Table 5d: Primary antibodies used for IF in this study
Antidbodies	Company	Catalog number	Dilution
Rabbit monoclonal anti-CTH (D1N1D)	Cell Signaling Technology	Cat# 19689T	1:100 for IF
Rabbit monoclonal anti-CBS (D8F2P)	Cell Signaling Technology	Cat# 14782T	1:100 for IF
Mouse monoclonal anti-LaminA/C (E-1)	Santa Cruz	Cat# sc-376248	1:100 for IF
Rabbit polyclonal anti-LaminB1	Abcam	Cat# ab16048	1:100 for IF
Mouse monoclonal anti-LaminB1	Santa Cruz	Cat# sc-374015	1:100 for IF
Rabbit monoclonal anti-Acetyl-Histone H3 (Lys9) (C5B11)	Cell Signaling Technology	Cat# 9649S	1:100 for IF
Rabbit polyclonal anti-Histone H3 (tri methyl K9)	Abcam	Cat# ab8898	1:100 for IF
Rabbit monoclonal anti-Phospho-Histone H2A.X (Ser139) (20E3)	Cell Signaling Technology	Cat# 9718T	1:100 for IF
Mouse monoclonal Anti-phospho-Histone H2A.X (Ser139)	Millipore	Cat# 05-636-I	1:100 for IF
Mouse monoclonal anti-Alpha-Actinin ACTN2	Boster Biological Technology	Cat# MA1104	1:100 for IF
Mouse monoclonal anti-OCT3/4 (C-10)	Santa Cruz	Cat# sc-5279	1:100 for IF
Goat polyclonal anti-cardiac troponin I	Abcam	Cat# ab56357	1:100 for IF
Rabbit polyclonal anti-trimethyl-Histone H3 (Lys27) Antibody	Millipore	Cat# 07-449	1:100 for IF

## Sheet: Antibodies used for ChIP
Supplementary Table 5e: Antibodies used for ChIP in this study
Antidbodies	Company	Catalog number	Dilution
Rabbit monoclonal anti-Acetyl-Histone H3 (Lys9) (C5B11)	Cell Signaling Technology	Cat# 9649S	1µg for 1 Million cells
Rabbit monoclonal anti-Acetyl-Histone H3 (Lys27) (D5E4)	Active motif	Cat# 39135	1µg for 1 Million cells
Mouse monoclonal anti-LaminA/C (131C3)	Abcam	Cat# ab8984	5µg for 5 Million cells
Rabbit polyclonal anti-trimethyl-Histone H3 (Lys27) Antibody	Millipore	Cat# 07-449	1µg for 1 Million cells
Rabbit polyclonal anti-Histone H3 (tri methyl K9)	Abcam	Cat# ab8898	1µg for 1 Million cells
Mouse monoclonal anti-SP1	Santa Cruz Biotechnology	Cat# sc-17824	2µg for 5 Million cells

## Sheet: Primary antibodies  for FACS
Supplementary Table 5f: Primary antibodies used for FACS in this study
Antidbodies	Company	Catalog number	Dilution
Mouse monoclonal anti-OCT3/4 (C-10)	Santa Cruz	Cat# sc-5279	1:00 for FACS
Rabbit polyclonal anti-NANOG	Cell Signaling Technology	Cat# 3580	1:00 for FACS
Alexa Fluor® 647 Mouse Anti-Cardiac Troponin T Clone 13-11	BD Biosciences	Cat# 565744	1:40 for FACS
Mouse monoclonal anti-LaminA/C (E-1)	Santa Cruz	Cat# sc-376248	1:00 for FACS

## Sheet: Secondary antibodies
Supplementary Table 5g: Secondary antibodies used in this study
Antidbodies	Company	Catalog number	Dilution
Donkey anti-Mouse IgG (H+L) Highly Cross-Adsorbed Secondary Antibody, Alexa Fluor 555	Thermo Fisher Scientific	Cat# A-31570	1:500 for IF and 1:200 for FACS
Donkey anti-Mouse IgG (H+L) Highly Cross-Adsorbed Secondary Antibody, Alexa Fluor™ 488	Thermo Fisher Scientific	Cat# A-21202	1:500 for IF and 1:200 for FACS
Donkey anti-Rabbit IgG (H+L) Highly Cross-Adsorbed Secondary Antibody, Alexa Fluor 488	Thermo Fisher Scientific	Cat# A-21206	1:500 for IF and 1:200 for FACS
Donkey anti-Rabbit IgG (H+L) Highly Cross-Adsorbed Secondary Antibody, Alexa Fluor™ 555	Thermo Fisher Scientific	Catalog # A-31572	1:500 for IF and 1:200 for FACS
Donkey anti-Goat IgG (H+L) Cross-Adsorbed Secondary Antibody, Alexa Fluor™ 555	Thermo Fisher Scientific	Catalog # A-21432	1:500 for IF and 1:200 for FACS
Donkey anti-Mouse IgG (H+L) Highly Cross-Adsorbed Secondary Antibody, Alexa Fluor™ 647	Thermo Fisher Scientific	Catalog # A-31571	1:500 for IF and 1:200 for FACS
Goat anti-Mouse HRP IgG (H+L)	Jackson Immunoresearch	115-035-003	1:5000 for WB
Goat anti-Rabbit HRP IgG (H+L)	Jackson Immunoresearch	115-035-045	1:5000 for WB
