# Supplementary material for: Lamin A/C-regulated cysteine catabolic flux modulates stem cell fate through epigenome reprogramming
Source: Springer Nature journal article supplement (doi:10.1038/s42255-025-01443-2), 2026-01-28
Supplement: MOESM8 [file 42255_2025_1443_MOESM8_ESM.xlsx]

## Sheet: Supplementary Fig. 1a
Supplementary Fig. 1a： Gene ontology analyses of genes upregulated in Lmna-/- mESCs. Log2 fold change ≥ 0.58; p-adjust value <0.05.
Category	Term	Count	%	PValue	Genes	List Total	Pop Hits	Pop Total	Fold Enrichment	Bonferroni	Benjamini	FDR
GOTERM_BP_DIRECT	GO:0045944~positive regulation of transcription by RNA polymerase II	81	7.90244	5.89999e-08	MESP2, CREBZF, ACVRL1, CITED2, BMYC, NR3C1, SOX21, FGF4, IRF2BPL, SOX1, SOX17, HNF4A, MYC, ZC3H12A, NFATC2IP, SOX7, TEAD4, EOMES, FOXD3, NKX6-3, TCF15, NOG, TET2, ABHD14B, HNF1B, BHLHA15, ETV4, GTF2F2, KLF15, POU5F1, METTL23, ELF1, PLSCR1, PAX8, ELF4, TFR2, TFEC, TET3, ITGA6, IRF5, RBCK1, RAPGEF3, NUFIP1, AIRE, EPAS1, GATA6, GATA4, NOD2, FOXO3, GATA1, ABLIM2, GBX2, BLOC1S2, E2F2, CAMTA1, STAT6, P…	989	1284	29712	1.8952	0.00023609	0.000236118	0.000235292
GOTERM_BP_DIRECT	GO:0030154~cell differentiation	50	4.87805	2.1656e-07	ACVRL1, PIWIL4, ROBO4, TCF23, FGF3, FGF4, M1AP, FOXQ1, FHAD1, ZCWPW1, HNF4A, ANPEP, INSC, ZC3H12A, SOX7, EOMES, SEMA6C, FOXD3, NKX6-3, NKX6-2, TESC, BHLHA15, ETV4, EID1, ELF1, ELF4, SFRP5, ERF, COL13A1, EPAS1, SHCBP1L, ECSCR, NEDD4L, SPATA6, BTBD1, RAB29, MOV10L1, SEMA4A, CDX1, BTBD18, NTRK3, TNFSF12, SEMA4G, PLET1, POU2F3, VEGFA, DAZL, DAB1, MORN2, FGFR3	989	665	29712	2.25883	0.000866296	0.000311901	0.000310809
GOTERM_BP_DIRECT	GO:0098609~cell-cell adhesion	24	2.34146	2.33809e-07	ROBO4, CDSN, COL13A1, ITGB4, ITGA3, TCAM1, CELSR1, VEGFA, CDH5, LRRC7, DCHS2, ITGA10, BOC, CNTN2, ITGB7, DSG2, ITGA6, ESAM, PKP3, JAM2, LIMS2, ITGA9, NECTIN1, MPZL2	989	199	29712	3.62321	0.000935264	0.000311901	0.000310809
GOTERM_BP_DIRECT	GO:0007165~signal transduction	59	5.7561	3.43006e-06	ACVRL1, RTKN, GMFG, PITPNC1, CCND3, UBASH3B, PGLYRP1, PDE8A, PDGFRB, CHRNB4, CAMK1D, DAPK1, PPP2R5A, IRAK3, KREMEN2, CSNK1E, COMMD6, ANK1, DGKZ, TIRAP, SIGIRR, MOB3C, OLFM2, CEACAM1, ACAP1, MRAS, MMRN2, RIN3, RHOV, PLPP2, PDE9A, HDGFL3, DGKH, PNCK, PEX11B, PPM1J, NOD2, NDRG1, RHOBTB1, SCUBE2, WNT6, WNT11, CEACAM20, STAT6, CMTM7, STAT5A, NGFR, WNT10A, TNFSF13, PILRA, NFKB1, VEGFA, PTPRD, PPP1R1B, …	989	925	29712	1.91622	0.0136333	0.00343177	0.00341977
GOTERM_BP_DIRECT	GO:0001525~angiogenesis	27	2.63415	4.65632e-06	ACVRL1, ROBO4, EPAS1, ECSCR, SAT1, SOX17, ANPEP, ZC3H12A, PDGFRB, SEMA4A, FZD5, NOS3, TNFSF12, VEGFC, VEGFA, BMP4, BCAM, KLF5, COL4A2, ADM2, TGFBI, PLCD3, MFGE8, RAPGEF3, EPHA2, FGF10, HBEGF	989	288	29712	2.81648	0.0184621	0.00372692	0.00371388
GOTERM_BP_DIRECT	GO:0007267~cell-cell signaling	13	1.26829	1.88745e-05	WNT10A, DHH, GATA4, BHLHA15, BARX1, GATA1, PANX1, WNT6, WNT11, GJB4, GJB5, FGFR3, FGF10	989	83	29712	4.70545	0.0727541	0.0113176	0.011278
GOTERM_BP_DIRECT	GO:0007160~cell-matrix adhesion	14	1.36585	1.97958e-05	SNED1, COL13A1, ITGB4, ITGA3, ITGB3, EMP2, BCAM, BCL6, COL5A3, ITGA10, CNTN2, ITGB7, ITGA6, ITGA9	989	97	29712	4.33603	0.0761667	0.0113176	0.011278
GOTERM_BP_DIRECT	GO:0030336~negative regulation of cell migration	17	1.65854	4.58069e-05	ACVRL1, NGFR, CITED2, NOG, FIGNL2, ABHD6, FOXO3, KLF4, RAP2A, SFRP1, WNT11, STK24, HNF4A, MMRN2, CLDN19, EPPK1, ARPIN	989	151	29712	3.38226	0.167501	0.0229149	0.0228347
GOTERM_BP_DIRECT	GO:0031175~neuron projection development	19	1.85366	6.99405e-05	LYN, SEMA7A, UNC5A, LAMA1, STMN3, NEDD4L, GDPD5, POU4F1, SNX1, BLOC1S2, TMEM108, CDH23, CNTN2, NCAM1, MAPT, HAP1, NPTXR, LONRF2, HDGFL3	989	190	29712	3.00425	0.24415	0.0269501	0.0268558
GOTERM_BP_DIRECT	GO:0000122~negative regulation of transcription by RNA polymerase II	58	5.65854	7.25858e-05	CITED2, EHMT2, TCF23, BMYC, NR3C1, SOX21, LOXL2, IRF2BPL, DMBX1, FOXQ1, CCND3, SOX1, TRIM29, MYC, EOMES, FOXD3, NKX6-3, NKX6-2, NOG, ZBTB32, HNF1B, POU5F1, TLE5, EID1, RIPPLY3, TFEC, CRY1, JDP2, RPL10, SATB1, EPAS1, GATA6, GATA4, FOXO3, GATA1, PURA, ZFP57, HSF4, STAT6, MSC, IRX2, MAGEE2, MBD2, KLF4, POU4F1, SORBS3, TBX3, POU4F2, HOPX, NFKB1, VEGFA, KLF8, BMP4, KLF5, BCL6, NFIB, LPIN1, FGFR3	989	1005	29712	1.73379	0.25211	0.0269501	0.0268558
GOTERM_BP_DIRECT	GO:0008285~negative regulation of cell population proliferation	30	2.92683	7.40757e-05	ACVRL1, SPIN4, NDRG1, GATA1, CDH5, ATG101, HNF4A, ADORA1, SOX7, ZBTB7C, LYN, GABBR1, FZD5, NOS3, TESC, FBXO2, KLF4, BMP4, RIPPLY3, SFRP1, RGCC, DDAH1, SFRP5, CTH, MMRN2, CLDN19, SPRY2, CD9, FGFR3, PTGES	989	397	29712	2.27021	0.256556	0.0269501	0.0268558
GOTERM_BP_DIRECT	GO:0045893~positive regulation of DNA-templated transcription	48	4.68293	8.0903e-05	ACVRL1, ZFP423, SMARCD3, INO80D, CITED2, AIRE, EPAS1, GATA6, BMYC, GATA4, FOXO3, GATA1, WNT6, WNT11, SOX17, MYC, HNF4A, BLOC1S2, PCBD1, PCBD2, SOX7, PPARGC1B, TRIM44, TEAD4, EOMES, KCNH2, TESC, MBD2, MSL3, HNF1B, MAFA, KLF4, KLF15, ETV4, TBX3, NFKB1, TDRD3, POU5F1, BMP4, ELF1, SFRP1, KLF5, PAX8, NFIB, ELF4, IRF5, LPIN1, FGF10	989	782	29712	1.84404	0.276596	0.0269811	0.0268868
GOTERM_BP_DIRECT	GO:0001706~endoderm formation	6	0.585366	0.000129452	EOMES, SOX17, NOG, HNF1B, GATA4, SOX7	989	16	29712	11.2659	0.404349	0.0398513	0.0397119
GOTERM_BP_DIRECT	GO:0007155~cell adhesion	35	3.41463	0.000181338	COL15A1, CALCA, ITGB4, LAMA1, AMIGO1, ITGB3, ZAN, TCAM1, ADGRE5, CDH23, NCAM1, CGREF1, MOG, ITGA3, PCDH8, EMP2, PARVB, ATP1B1, AJAP1, CEACAM1, BCAM, DAB1, ITGA10, MMRN2, CLDN19, CD9, CNTN2, DSG2, ITGA6, COL6A6, TGFBI, MFGE8, EPHA2, ITGA9, NECTIN1	989	523	29712	2.01049	0.516054	0.0518369	0.0516555
GOTERM_BP_DIRECT	GO:0048513~animal organ development	9	0.878049	0.000260155	PDGFRB, IRX2, WNT10A, SPRY4, GATA6, SPRY2, GATA4, NRG2, BARX1	989	51	29712	5.30161	0.646996	0.0667692	0.0665356
GOTERM_BP_DIRECT	GO:0006357~regulation of transcription by RNA polymerase II	79	7.70732	0.000266943	MESP2, ZFP169, CITED2, EHMT2, TCF24, TCF23, NR3C1, CDC14B, IRF2BPL, DMBX1, FOXQ1, A430033K04RIK, PPP3CC, ZFP874B, SOX17, HNF4A, MYC, SOX7, ZFP760, TEAD4, EOMES, FOXD3, NKX6-3, NKX6-2, TCF15, ANXA4, HNF1B, ETV4, KLF15, POU5F1, TLE5, ELF1, PAX8, ELF4, SFRP5, TFEC, ERF, IRF5, JDP2, PPIC, ZFP423, SMARCD3, SATB1, EPAS1, ZFP229, FOXO6, PPM1J, GATA4, FOXO3, BARX1, PURA, GBX2, E2F2, CAMTA1, ZKSCAN2, STAT…	989	1569	29712	1.51265	0.656459	0.0667692	0.0665356
GOTERM_BP_DIRECT	GO:0045165~cell fate commitment	11	1.07317	0.000387064	TEAD4, BMP4, WNT6, WNT10A, NKX6-2, WNT11, GATA6, SPRY2, GATA4, GATA1, POU5F1	989	82	29712	4.03009	0.78761	0.0911194	0.0908007
GOTERM_BP_DIRECT	GO:0001714~endodermal cell fate specification	4	0.390244	0.000679951	EOMES, SOX17, HNF1B, POU5F1	989	6	29712	20.0283	0.934263	0.136671	0.136193
GOTERM_BP_DIRECT	GO:0010628~positive regulation of gene expression	36	3.5122	0.000695249	RPL5, CITED2, ITGB3, TCF23, ALOX12B, BMYC, GATA4, FGF4, CDH5, WNT6, SOX17, MYC, HNF4A, ZC3H12A, WNT10A, NOS3, ITGA3, WHRN, TESC, NTRK3, NOG, RAB27A, HNF1B, KLF4, ETV4, POU4F1, NFKB1, POU5F1, VEGFA, BMP4, PLSCR1, RGCC, ADM2, CLDN19, SPRY2, FGFR4	989	586	29712	1.84561	0.938169	0.136671	0.136193
GOTERM_BP_DIRECT	GO:0030335~positive regulation of cell migration	21	2.04878	0.000706828	PDGFRB, LYN, SEMA5B, SEMA6C, SEMA4A, SEMA7A, ITGB3, NTRK3, TRADD, VEGFC, SEMA4G, PLET1, VEGFA, VIL1, BMP4, CDH5, SPRY2, F2RL1, ITGA6, HBEGF, EPHA2	989	268	29712	2.35407	0.940971	0.136671	0.136193
GOTERM_BP_DIRECT	GO:1902895~positive regulation of miRNA transcription	9	0.878049	0.000717166	BMP4, NGFR, KLF5, MYC, BMYC, GATA4, FOXO3, KLF4, NR3C1	989	59	29712	4.58275	0.943365	0.136671	0.136193
GOTERM_BP_DIRECT	GO:0008543~fibroblast growth factor receptor signaling pathway	12	1.17073	0.000751655	KLB, PDGFRB, NGFR, NTRK3, NOG, SPRY2, FGFR4, FGFR3, FGF3, FGF10, EPHA2, FGF4	989	105	29712	3.43342	0.950672	0.136733	0.136255
GOTERM_BP_DIRECT	GO:0006654~phosphatidic acid biosynthetic process	6	0.585366	0.000821812	DGKE, GPAT2, LPIN1, DGKZ, AGPAT2, DGKH	989	23	29712	7.83717	0.962755	0.140563	0.140072
GOTERM_BP_DIRECT	GO:0042472~inner ear morphogenesis	10	0.97561	0.000842959	GBX2, PAX8, PRRX2, CDH23, CHRNA9, SPRY2, ATP2B2, CELSR1, TBX3, FGF10	989	75	29712	4.00566	0.96578	0.140563	0.140072
GOTERM_BP_DIRECT	GO:0030855~epithelial cell differentiation	12	1.17073	0.00102707	VIL1, BDH2, TST, PAX8, COL4A1, ANXA4, GATA6, KRT13, TAGLN2, KLF4, VEGFA, FGF10	989	109	29712	3.30743	0.983632	0.164414	0.163839
GOTERM_BP_DIRECT	GO:0071456~cellular response to hypoxia	14	1.36585	0.00114164	CITED2, EPAS1, PRKCE, GATA6, BMYC, FOXO3, NDRG1, VEGFA, PTPRD, SFRP1, RGCC, CBS, MYC, KCNK3	989	145	29712	2.90065	0.989657	0.17551	0.174896
GOTERM_BP_DIRECT	GO:0060070~canonical Wnt signaling pathway	12	1.17073	0.00119323	WNT6, FRAT1, WNT10A, SFRP1, WNT11, FZD5, SFRP5, SIAH2, DIXDC1, CSNK1E, FOXO3, KLF4	989	111	29712	3.24783	0.991588	0.17551	0.174896
GOTERM_BP_DIRECT	GO:0048863~stem cell differentiation	10	0.97561	0.00122795	BMP4, DNMT3L, SOX17, NOG, GATA6, A2M, EPOP, ETV4, SOX21, POU5F1	989	79	29712	3.80284	0.992681	0.17551	0.174896
GOTERM_BP_DIRECT	GO:0048514~blood vessel morphogenesis	7	0.682927	0.00147898	ACVRL1, LAMA1, COL4A1, SLC1A1, VEGFA, FGF10, EPHA2	989	38	29712	5.53414	0.997324	0.204099	0.203385
GOTERM_BP_DIRECT	GO:0009100~glycoprotein metabolic process	5	0.487805	0.00160599	PORCN, GMPPA, PCSK6, ST6GALNAC3, ASGR2	989	16	29712	9.38827	0.998391	0.214239	0.213489
GOTERM_BP_DIRECT	GO:0043066~negative regulation of apoptotic process	38	3.70732	0.00179281	RPL10, CITED2, GATA6, HSPB2, HSPB1, GATA4, NR3C1, GATA1, FGF4, CKMT1, ALDH2, CBS, ADORA1, MIR92-1, AAMDC, PDGFRB, NGFR, CAMK1D, DAPK1, PRKCE, SIAH2, TEX11, ASNS, HNF1B, PRAMEL1, POU4F1, TBX3, NFKB1, VEGFA, HIGD2A, DNAJC3, SFRP1, BCL6, CTH, SPRY2, DSG2, NAA16, LIMS2	989	666	29712	1.71413	0.999239	0.231445	0.230636
GOTERM_BP_DIRECT	GO:0030513~positive regulation of BMP signaling pathway	7	0.682927	0.00194379	ACVRL1, BMP4, CDH5, ZFP423, GATA6, KCP, GATA4	989	40	29712	5.25743	0.999585	0.233327	0.23251
GOTERM_BP_DIRECT	GO:0033627~cell adhesion mediated by integrin	7	0.682927	0.00194379	ITGA3, ITGB4, ITGB3, ITGA10, ITGA6, ITGB7, ITGA9	989	40	29712	5.25743	0.999585	0.233327	0.23251
GOTERM_BP_DIRECT	GO:0002089~lens morphogenesis in camera-type eye	5	0.487805	0.00204525	BCAR3, SOX1, CITED2, FGFR3, NECTIN1	989	17	29712	8.83602	0.999724	0.233327	0.23251
GOTERM_BP_DIRECT	GO:0006629~lipid metabolic process	18	1.7561	0.00208527	B3GALNT1, RETSAT, CIDEA, ANO9, HPS6, PLAAT3, FAH, GDPD5, MTLN, MTM1, OSBPL10, GPR180, HNF4A, CTH, FDX1, LPIN1, ST6GALNAC3, BCAT2	989	232	29712	2.33088	0.999765	0.233327	0.23251
GOTERM_BP_DIRECT	GO:0007411~axon guidance	16	1.56098	0.00209889	NGFR, SEMA5B, SEMA6C, SEMA4A, SEMA7A, UNC5A, LAMA1, NOG, MYCBP2, SEMA4G, POU4F2, GBX2, BOC, CNTN2, CDK5R2, NECTIN1	989	193	29712	2.49057	0.999777	0.233327	0.23251
GOTERM_BP_DIRECT	GO:0045600~positive regulation of fat cell differentiation	8	0.780488	0.00222306	SFRP1, KLF5, ZC3H12A, CCDC3, UCHL3, AAMDC, ZBTB7C, CMKLR1	989	55	29712	4.36981	0.999865	0.240451	0.23961
GOTERM_BP_DIRECT	GO:0032956~regulation of actin cytoskeleton organization	11	1.07317	0.00245821	PDGFRB, ARHGEF15, ITGB3, DIXDC1, ESAM, BAIAP2, CELSR1, CORO2B, RHOBTB1, RAPGEF3, MYO1F	989	104	29712	3.17757	0.999947	0.258888	0.257982
GOTERM_BP_DIRECT	GO:0032682~negative regulation of chemokine production	4	0.390244	0.00264938	SIGIRR, F2RL1, SLC37A4, EPHA2	989	9	29712	13.3522	0.999976	0.270553	0.269606
GOTERM_BP_DIRECT	GO:0007399~nervous system development	22	2.14634	0.00270418	SEMA6C, SEMA4A, SMARCD3, CAMK1D, NTRK3, ISLR2, NRG2, SEMA4G, POU4F1, GFRA2, VEGFA, IRF2BPL, PTPRD, PURA, DAB1, GLRB, PAX8, BOC, ZC3H12A, INSC, TNIK, MDGA1	989	321	29712	2.05899	0.99998	0.270553	0.269606
GOTERM_BP_DIRECT	GO:0043410~positive regulation of MAPK cascade	17	1.65854	0.00286239	LYN, BCAR3, NGFR, PRKCE, PELI2, LAPTM5, ADRB1, ALOX12B, NOD2, SORBS3, FGF3, VEGFA, FGF4, GRM4, ADORA1, FGFR3, FGF10	989	219	29712	2.33206	0.99999	0.270592	0.269646
GOTERM_BP_DIRECT	GO:0035556~intracellular signal transduction	27	2.63415	0.00290393	NIM1K, DGKE, HSPB1, NOD2, NRGN, WNT11, MKNK1, PAK6, PLEK2, LYN, PDGFRB, DAPK1, PRKCE, DCLK3, IRAK3, NRG2, DGKZ, ZAP70, DAB1, TCL1, STK24, PPP1R1B, CLNK, TNIK, PLCD3, RAPGEF3, DGKH	989	432	29712	1.87765	0.999991	0.270592	0.269646
GOTERM_BP_DIRECT	GO:0045766~positive regulation of angiogenesis	14	1.36585	0.00290741	ACVRL1, NOS3, ITGB3, GATA6, VEGFC, HSPB1, EMP2, GATA4, VEGFA, CDH5, DDAH1, ADM2, ZC3H12A, RAPGEF3	989	161	29712	2.61239	0.999991	0.270592	0.269646
GOTERM_BP_DIRECT	GO:0002720~positive regulation of cytokine production involved in immune response	5	0.487805	0.00315932	LACC1, LAPTM5, F2RL1, IRF5, NOD2	989	19	29712	7.90591	0.999997	0.287355	0.286349
GOTERM_BP_DIRECT	GO:0019344~cysteine biosynthetic process	3	0.292683	0.00324063	CBS, CTH, GGT1	989	3	29712	30.0425	0.999998	0.2882	0.287192
GOTERM_BP_DIRECT	GO:0038063~collagen-activated tyrosine kinase receptor signaling pathway	8	0.780488	0.00333361	PDGFRB, COL4A2, UBASH3B, COL4A1, NTRK3, FGFR4, FGFR3, EPHA2	989	59	29712	4.07355	0.999998	0.290024	0.28901
GOTERM_BP_DIRECT	GO:0071314~cellular response to cocaine	4	0.390244	0.00369167	EHMT2, PPP1R1B, SLC1A1, TGM2	989	10	29712	12.017	1	0.307859	0.306782
GOTERM_BP_DIRECT	GO:0010976~positive regulation of neuron projection development	15	1.46341	0.00369587	LYN, NGFR, CAMK1D, ITGA3, NTRK3, AMIGO1, ACSL6, HSPB1, BAIAP2, FIG4, BMP4, LRRC7, ITGA6, MAPT, HAP1	989	185	29712	2.43588	1	0.307859	0.306782
GOTERM_BP_DIRECT	GO:0071773~cellular response to BMP stimulus	6	0.585366	0.00384188	ACVRL1, BMP4, SPINT1, KCND3, NOG, GATA6	989	32	29712	5.63296	1	0.307859	0.306782
GOTERM_BP_DIRECT	GO:0032695~negative regulation of interleukin-12 production	5	0.487805	0.00384632	IRAK3, NOD2, PIBF1, NFKB1, CMKLR1	989	20	29712	7.51062	1	0.307859	0.306782
GOTERM_BP_DIRECT	GO:0010629~negative regulation of gene expression	25	2.43902	0.00396718	ACVRL1, CITED2, GATA4, MYC, ZC3H12A, CPNE1, MIR124A-1HG, BBS2, NDFIP2, ACE, NOG, KLF4, POU4F1, NFKB1, POU5F1, VEGFA, TLE5, BMP4, SFRP1, TCL1, CLDN19, CCDC3, MAPT, FGFR4, FGFR3	989	398	29712	1.88709	1	0.308738	0.307658
GOTERM_BP_DIRECT	GO:0032088~negative regulation of NF-kappaB transcription factor activity	9	0.878049	0.00403562	TRIM40, ANXA4, ZC3H12A, IRAK3, NOD2, RBCK1, KLF4, COMMD6, CMKLR1	989	77	29712	3.51146	1	0.308738	0.307658
GOTERM_BP_DIRECT	GO:0050679~positive regulation of epithelial cell proliferation	10	0.97561	0.00408874	BMP4, SFRP1, MYC, NOG, HTRA1, VEGFC, BMYC, NOD2, VEGFA, FGF10	989	94	29712	3.19601	1	0.308738	0.307658
GOTERM_BP_DIRECT	GO:1990830~cellular response to leukemia inhibitory factor	21	2.04878	0.00423138	EIF4A2, FOXD3, SPRY4, ILDR1, LAPTM5, VEGFC, KLF4, POU5F1, FGF4, SYNGR1, KLF5, SOX1, MRAS, SOX17, CTH, SPRY2, PADI2, MSC, MIR92-1, PFKP, BCAT2	989	312	29712	2.02209	1	0.308878	0.307798
GOTERM_BP_DIRECT	GO:0006915~apoptotic process	33	3.21951	0.00424495	HRK, RTKN, TRADD, ECSCR, FGF4, SYCE3, FHAD1, WNT11, ZC3H12A, PMAIP1, PGLYRP1, RNF152, CTSC, SRGN, NGFR, UNC5A, DAPK1, SIAH2, TEX11, CIDEA, EMP1, HNF1B, EMP2, IRAK3, NFKB1, POU4F2, VEGFA, VIL1, PLSCR1, CYCT, TMEM219, XAF1, FGFR3	989	583	29712	1.70052	1	0.308878	0.307798
GOTERM_BP_DIRECT	GO:0044027~negative regulation of gene expression via chromosomal CpG island methylation	5	0.487805	0.00462777	DNMT3L, ZFP57, EHMT2, MYC, BMYC	989	21	29712	7.15297	1	0.327872	0.326725
GOTERM_BP_DIRECT	GO:0022008~neurogenesis	12	1.17073	0.00466984	EOMES, IFT20, BTBD1, NFIB, SLC1A1, HAP1, CELSR1, FGF11, FGF3, CLN5, FGF10, FGF4	989	132	29712	2.73113	1	0.327872	0.326725
GOTERM_BP_DIRECT	GO:0031642~negative regulation of myelination	4	0.390244	0.00495133	FIG4, LPIN1, CTSC, JAM2	989	11	29712	10.9245	1	0.335696	0.334521
GOTERM_BP_DIRECT	GO:0030033~microvillus assembly	4	0.390244	0.00495133	RAP2A, KLF5, MYO1A, TNIK	989	11	29712	10.9245	1	0.335696	0.334521

## Sheet: Supplementary Fig. 1d
Supplementary Fig. 1d: Metabolites detected by LC-MS/MS based untargeted metabolomics in ESC
Metabolites	ES WT	ES WT	ES WT	ES WT	ES WT	ES WT	ES KO	ES KO	ES KO	ES KO	ES KO	ES KO
Glucose	53.4242	64.6933	65.4565	301.351	574.953	431.736	73.4842	98.8777	124.763	131.039	412.589	406.846
Glucose_6P	55.6454	66.0658	83.5931	115.018	179.732	138.312	72.773	68.176	167.332	107.539	150.737	204.765
Fructose_6P	122.235	151.489	292.928	208.821	158.092	286.395	134.394	260.55	166.562	131.048	230.67	285.416

## Sheet: Supplementary Fig. 1e
Supplementary Fig. 1e: Metabolites detected by LC-MS/MS based untargeted metabolomics in ESC
Metabolites	ES WT	ES WT	ES WT	ES WT	ES WT	ES WT	ES KO	ES KO	ES KO	ES KO	ES KO	ES KO
Glutamine	2214.53	1370.14	2100.96	1969.44	1180.36	1683.85	1283.42	2134.61	1163.51	1807.34	1639.67	1983.72
Glutamate	12336.9	8305.28	13857.8	10481.5	6717.89	8123.7	6081.27	10846.5	6019.46	9048.56	6134.59	6545.05

## Sheet: Supplementary Fig. 1f
Supplementary Fig. 1f: Metabolites detected by LC-MS/MS based untargeted metabolomics in ESC
Metabolites	ES WT	ES WT	ES WT	ES WT	ES WT	ES WT	ES KO	ES KO	ES KO	ES KO	ES KO	ES KO
Fumarate	6.41903	7.87433	7.31575	9.08506	11.3771	7.18788	16.411	13.7476	21.3274	11.5784	9.37319	9.14621
Succinate	8.78188	8.6027	7.74695	16.1996	28.4154	24.2625	8.79298	14.2051	15.261	13.4098	24.9135	22.0038
Malate	114.336	160.221	141.1	233.588	321.372	187.924	214.384	198.389	732.889	240.8	266.961	191.359
aKetogluterate	9.66241	12.0353	13.0139	19.6662	25.6259	13.8206	16.045	14.1392	29.2925	24.1428	14.8557	18.0092
Citrate	37.437	46.7207	43.8591	23.8235	54.4876	34.0113	47.7974	35.7171	47.2943	18.6311	28.8495	12.2658
Isocitrate	1.46764	1.88689	1.87267	1.16468	1.96302	1.4045	1.04911	1.1044	1.14595	0.673454	0.988787	0.663524
cis_aconiti_ acid	3.73606	4.80531	5.71317	3.66824	5.23867	0	5.24484	4.15337	5.00611	2.36485	5.83316	0

## Sheet: Supplementary Fig. 2b
Supplementary Fig. 2b： Relative mRNA expression after 3 days of 100nM Cheatocin or 5nM TSA treatment
Cbs			Cth
DMSO	100nM Cheatocin	5nM TSA	DMSO	100nM Cheatocin	5nM TSA
1.20387	2.47163	1.15227	0.978419	1.38987	0.822342
0.830652	2.33253	0.860494	1.02206	0.981646	1.03564
1.21453	1.31944	0.909276	0.740786	1.56097	1.27811
1.27993	1.37146	0.936597	0.782897	2.02593	1.85081

## Sheet: Supplementary Fig. 3c
Supplementary Fig. 3c
% of OCT4 high cells
shCtrl	shLmna KO	shCbs WT	ShCbs Lmna KO	shCth WT	ShCth Lmna KO	CBS OE	CTH OE
48.06	41.24	61.2	47.6	58.7	47.9	37.7	40.68
49.86	42.33	67.8	47.1	59.4	48.5	34.66	39.01
48.03	40.2	65.4	46.76	62.5	46.78	35.21	39.77

## Sheet: Supplementary Fig. 3d
Supplementary Fig. 3d
% of NANOG high cells
+Cys	+AOAA	-Cys	+AOAA-Cys
47.62	68.63	76.6	82.37
47.49	69.67	75.21	81.94
53	67.72	71.8	78.71

## Sheet: Supplementary Fig. 3g
Supplementary Fig. 3g : Relative mRNA expression
	Lmna+/+				Lmna-/- (-dox)				Lmna-/- (+dox 48h)
Cth	1.03791	0.963473	1.18	0.85	3.78	3.04	3.76	4.18	1.58	1.3	1.49	1.37
Cbs	1.01	0.98	1	1	3.35	2.90861	2.92	2.73	1.3	1.62	1.26	1.34

## Sheet: Supplementary Fig. 3h
Supplementary Fig. 3h
% of NANOG high cells
Lmna+/+	Lmna-/- (-dox)	Lmna-/- (+dox 48h)
49.68	19.95	40.33
48.64	20.67	40.61
50.36	21.79	42

## Sheet: Supplementary Fig. 4a
Supplementary Fig. 4a
AMC standard curve
AMC concentration (µM)	Relative fluorescent units
0	0
1.5625	359643
3.125	639549
6.25	1.09229e+06
12.5	1.69964e+06
25	2.62331e+06
50	3.52573e+06
	2.17751e+06
	2.16876e+06
	2.12876e+06
	2.17301e+06
	2.15108e+06
	2.18648e+06
	2.19771e+06
	2.20697e+06
	2.1131e+06
	1.98623e+06
	1.96059e+06
	1.90764e+06
	2.18818e+06
	2.16831e+06
	2.28499e+06
	2.2431e+06
	2.28845e+06
	2.29302e+06
	2.2789e+06
	2.29473e+06
	2.09348e+06
	2.02226e+06
	1.96546e+06
	1.95225e+06
	1.79894e+06
	1.81172e+06
	1.8249e+06
	1.75093e+06
	1.77385e+06
	1.76464e+06
	1.85745e+06
	1.85756e+06
	1.80796e+06
	1.67489e+06
	1.60643e+06
	1.54498e+06
	1.52144e+06
	1.40972e+06
	1.47491e+06
	1.49009e+06
	1.50235e+06
	1.49261e+06
	1.53572e+06
	1.56212e+06
	1.40868e+06
	1.4305e+06
	1.32646e+06
	1.46597e+06
	2145768
	1969897
	1928627
	1918250
	1902880
	1877493
	1885197
	1909912
	1922940
	1867125
	1908326
	1917721
	1996329
	1931007
	1905446
	1890836
	1889459
	1824006
	1827662
	1773251
	1661496
	1650705
	1723985
	1835941
	1774777
	1792426
	1742769
	1763988
	1743628
	1657194
	1607455
	1608755
	1661780
	1638943
	1475614
	1509576
	1508938
	1507756
	1444091
	1473179
	1478045
	1452898
	1410895
	1424136
	1337220
	1376425
	1426016
	1565580
	1.58666e+06
	1.54546e+06
	1.55586e+06
	1.51783e+06
	1.45997e+06
	1.52542e+06
	1.44096e+06
	1.46081e+06
	1.49665e+06
	1.43652e+06
	1.4055e+06
	1.57775e+06
	1.37448e+06
	1.29783e+06
	1.33749e+06
	1.29047e+06
	1.28854e+06
	1.33127e+06
	1.30129e+06
	1.32613e+06
	1.32953e+06
	1.33406e+06
	1.31554e+06
	1.35171e+06
	1.07813e+06
	1.15422e+06
	1.16388e+06
	1.17913e+06
	1.15846e+06
	1.15893e+06
	1.15908e+06
	1.18054e+06
	1.21177e+06
	1.15861e+06
	1.1615e+06
	1.04752e+06
	1.06548e+06
	1.09687e+06
	1.11758e+06
	1.11382e+06
	1.11278e+06
	1.13927e+06
	1.11758e+06
	1.08632e+06
	1.14513e+06
	1.10605e+06
	1.15672e+06
	1.15165e+06

[truncated: 8 more sheets: Supplementary Fig. 4b, Supplementary Fig. 5b, Supplementary Fig. 6a, Supplementary Fig. 6d, Supplementary Fig. 6e, Supplementary Fig. 6f, Supplementary Fig. 6g, Supplementary Fig. 6h]
