# Supplementary material for: Lamin A/C-regulated cysteine catabolic flux modulates stem cell fate through epigenome reprogramming
Source: Springer Nature journal article supplement (doi:10.1038/s42255-025-01443-2), 2026-01-28
Supplement: MOESM9 [file 42255_2025_1443_MOESM9_ESM.xlsx]

## Sheet: Fig.1a
Figure 1a
Genes within Lamin A/LaminB1 LADs	Genes shows increased ATAC signal upon Lmna loss
Rp1	Gm6994
Xkr4	Pcdh9
Oprk1	Spry2
Npbwr1	Klf5					.
Rb1cc1	Gm9748
St18	Tbc1d4
Sntg1	Slc15a1
Cpa6	Tdrd3
A830018L16Rik	Mir5130
Trpa1	Dach1
Kcnb2	Uggt2
Stau2	Cln5
Gdap1	4930474H20Rik
Jph1	Gpc6
Defb44-ps	Gm5089
Defb18	Pcdh17
NA	Fbxl3
Defb41	Lmo7
Crisp4	Ndfip2
Crispld1	Slitrk5
Pi15	Erdr1
Tfap2d	LOC105245869
Pkhd1	Vwa8
Rims1	Bora
Kcnq5	Mzt1
Mir30a	Sugt1
Ppp1r14bl	Rap2a
Ogfrl1	Dgkh
Mir30c-2	Slain1
Col19a1	Enox1
Col9a1	Ipo5
Adgrb3	Klf12
4931408C20Rik	1700128A07Rik
Gm597	Tmtc4
Lmbrd1	4930529K09Rik
Khdrbs2	Ednrb
Gm4850	1700024B18Rik
Lgsn	Gpalpp1
Semp2l1	4930524C18Rik
Gm9839	Nalcn
4931428L18Rik	Naa16
Dnaaf6	Clybl
Col3a1	Hs6st3
Col5a2	Kbtbd7
Gulp1	Abcc4
Gm3852	Dock9
Stk-ps2	Gpc5
Dnah7b	Pibf1
Tmeff2	2610035F20Rik
Mstn	Ubac2
Pms1	A330035P11Rik
1700019A02Rik	Wbp4
Hecw2	Spertl
Ccdc150	Diaph3
Satb2	G530011O06Rik
Plcl1	Gpr180
Hsfy2	Mbnl2
Boll	1810041H14Rik
9130024F11Rik	9630013A20Rik
Icos	Mir1971
Pard3b	Dis3
Crygf	Tsc22d1
Map2	Stk24
Pth2r	Dct
Unc80	Gm32455
Erbb4	D130009I18Rik
Cps1	Dnajc3
Ikzf2	Oxgr1
Vwc2l	Rbm26
Spag16	2900040C04Rik
Abca12	Nufip1
Scg2	Mir17
Ap1s3	Zc3h13
Kcne4	Mycbp2
Irs1	Glra1
Dock10	Fgf14
Nyap2	Pcca
Col4a3	Rgcc
Col4a4	Commd6
Mff	Slain1os
Rhbdd1	Tnfsf11
Ccl20	Klhl1
Daw1	Smim31
Sphkap	Slitrk1
Pid1	5430440P10Rik
St8sia4	Mir6239
Slco4c1	Mir6390
Fam174a	Nkx6-3
Ppip5k2	Kctd4
Macir	Dzip1
Slco6b1	Dnajc15
Slco6c1	Lacc1
Pam	Farp1
Cdh20	Zic5
Cntnap5b	Kbtbd6
Slco6d1	Mir6391
Rnf152	4930449E01Rik
Phlpp1	4930594M22Rik
Bcl2	Cacna1c
Serpinb7	4930433B08Rik
Serpinb2	Akap11
Serpinb3a	Tas2r130
Serpinb8	Uchl3
Cdh19	Scel
Serpinb13	Itgbl1
Serpinb10	Mras
Cdh7	Elf1
Dsel	Prr30
Serpinb3c	Foxn3
Serpinb3b	Cldn10
Serpinb3d	Gm1587
Serpinb11	Snora31
Serpinb12	Gtf2f2
Cntnap5a	Olfm4
Dpp10	Eea1
Nckap5	Esrrb
Thsd7b	Cnmd
Ptprc	Zfp521
Atp6v1g3	Gm16835
Nek7	2025-09-01
Mir181a-1	Zmat4
Crb1	Lars
Dennd1b	Slitrk6
Cfh	Cggbp1
F13b	Lcp1
Cfhr4	Mir759
Kcnt2	Zic2
Cfhr1	St3gal1
Cfhr2	Tgds
Rgs2	1700044C05Rik
Rgs13	D330050G23Rik
Rgs1	Myl4
Rgs18	Tm9sf2
Brinp3	4930474G06Rik
Pla2g4a	Tacc2
Pdc	Pde3a
Hmcn1	Hcrtr2
Cacna1e	Bvht
Rasal2	Pde4d
Astn1	Nrg1
Pappa2	Bub1b
Brinp2	Gm10400
Mir488	Mir92-1
Sec16b	AI427809
Tnr	Olfr478
Tnn	Tox2
4930523C07Rik	Pcdh20
Rabgap1l	Vwc2l
Gpr52	Vwf
Fasl	Pou4f1
Tnfsf4	Mir9b-1
Suco	Pcsk2os2
Tnfsf18	Gpr18
Dnm3	4933432I03Rik
Dnm3os	Tmem154
Pigc	Mtrf1
Fmo1	C2cd5
Fmo3	Prodh
Fmo4	Msln
Fmo6	Mir710
Fmo2	Pramel6
Mroh9	Slc7a12
Prrx1	BB014433
Kifap3	Sall3
Ntmt2	Nr4a1
Gorab	Adap1
Sele	Crybg3
Sell	1700019D03Rik
Selp	Map3k7cl
F5	Ptprk
Xcl1	4930505G20Rik
Dpt	1700096K18Rik
Gm4846	Strn3
Gm4847	Tet2
Fmo9	Csrp2
Pbx1	Hopx
Rgs4	Ssr2
Rgs5	Cdc37l1
Cd48	Kmt2c
Cd84	Dhrs7
Itln1	1700012D16Rik
Ly9	Sulf2
Cd244a	Rbpj
Slamf1	Camkmt
Slamf7	Clec4a4
Crp	Jam2
Fcer1a	Cd9
Or10j5	Cd2ap
Apcs	Srpr
Or10j2	Tbx19
Or10j7	Ncam2
Or10j27	Timm8a2
Or10j3	Ppp1r21
Or10j3b	Rnf2
Ifi208	Ptprg
Mndal	A330009N23Rik
Ifi203	Cemip
Ifi204	Pdzd2
Spta1	Bcat1
Ifi205	Zswim6
Ifi209	Manba
Grem2	Clasp2
Or10x1	Fbxw10
Or6k2	Arl15
Or10x4	Gm14725
Or10z1	Ildr1
Or10aa3	1700071M16Rik
Or10aa1	Tbx20
Or6n2	Foxn2
Olfr421-ps1	Olfr382
Or6k4	Iqgap2
Or6n1	Cdk5rap2
Or6p1	Dysf
Or6k14	Ric8b
Ifi202b	Trim52
Ifi211	Tfcp2l1
Or6k6	Zfyve26
Fmn2	Plpp4
Ifi214	Rbms3
Ifi213	Asap1
Mptx1	Slc9b2
Chml	Slc15a2
Opn3	Dpyd
Fh1	4921525O09Rik
Rgs7	Nlrc4
Wdr64	Anapc10
Kmo	Zbtb7c
Pld5	Ahi1
Rbm8a2	Slc6a6
Cep170	Trappc12
Mir350	Steap2
Sdccag8	Mapt
Akt3	Mctp2
Lyplal1	Mir1195
Spata17	AU023762
Ush2a	Adamts20
Esrrg	Gm6602
Kcnk2	Ccser1
Cd34	Adam29
Cr2	Zfp326
Cr1l	Fam129a
Cd46	Rnd3
Plxna2	Idh3b
Gm16897	A530072M11Rik
A330023F24Rik	Atg14
Mir29c	Acod1
Mir29b-2	Tgm1
Oprm1	Mettl11b
Ipcef1	Srek1ip1
Rgs17	Cdadc1
Vip	L1td1
Syne1	Gm36582
Esr1	Gna14
Grm1	Nlrc3
Samd5	Acnat1
Gm5177	Agps
Rab32	Actr2
Stxbp5	Pla2g7
Epm2a	Gtf2h2
Phactr2	F630040K05Rik
Aig1	Rel
Hivep2	Golga4
Adgrg6	Msh2
Nmbr	Arhgap26
Vta1	Man1a
Gje1	Nde1
Eya4	AW549542
Gm9767	Ralgps2
L3mbtl3	Olfr1057
Samd3	Pcsk6
Tmem200a	4933406D12Rik
Lama2	Rnf219
Gm8709	Pitpna
Arhgap18	H2al2a
4930519F09Rik	2810414N06Rik
Ptprk	Slc35f2
Themis	Sinhcaf
9330159F19Rik	Ctnnbl1
Echdc1	Shq1
Soga3	Sorbs1
2310057J18Rik	Mir6406
Rspo3	Bckdhb
Supt4b	Ppm1a
Clvs2	Sipa1l1
Sult3a2	Gstp3
Tpd52l1	1700100I10Rik
Rnf217	Ttc27
Nkain2	Nova1
Sult3a1	Mybl2
Trdn	Cdyl2
Col10a1	Fxyd6
Frk	Plekhh1
Nt5dc1	Shc4
Hs3st5	Kcnk13
Grik2	Eml4
Hace1	Bicral
Lin28b	4921531C22Rik
Ascc3	Inhbb
Lilrb4b	Pik3r3
Lilrb4a	Gpt2
Ros1	Tns3
Sim1	Gm4668
Gprc6a	Top1
Vgll2	Degs1
Rfx6	Wwc1
Fam162b	Gjb4
Slc35f1	Slc18a1
Zfa-ps	Mir195b
Man1a	Ick
Fam184a	Gm4710
Tbc1d32	Zc3h12a
Msl3l2	Pole4
Fabp7	Tcf7l2
Pkib	Corin
Smpdl3a	Atmin
Lrrtm3	Ranbp6
Ctnna3	Mad1l1
Tmem26	Strn
1700049L16Rik	Fam53a
Pcdh15	Egfem1
Or7a41	Eed
Or7a42	Dusp23
Or7a39	Arhgef3
Or7c70	Lingo1
Or7a35	Mir5623
Or7a37	Fmn2
Or7a36	Pax8
Or7a38	Gm5907
Vmn2r81	Plpp3
Vmn2r80	4930522O17Rik
Vmn2r82	F13b
Vmn2r83	Lrp1b
1700113H08Rik	Prok2
Pah	Ate1
Pmch	Lrrc38
Parpbp	Schip1
Slc5a8	Fbxo47
Ano4	Twf1
Nr1h4	Hnrnpa3
Slc17a8	Osbpl9
Bltp3b	Noct
Anks1b	Lrrc63
Mir1251	Qpct
Rmst	Ebf1
Mir135a-2	Camta1
Nedd1	Mir1929
Gm10754	Mettl8
Dcn	Glrp1
Epyc	Pde6a
Kera	Got1
Lum	Rell1
Ccer1	Tanc2
Csl	2310005A03Rik
Gm4302	Scd3
Gm4307	Tlr4
Gm4312	Slc12a7
Kitl	Crygd
Tmtc3	Hdac4
Cep290	Itpk1
Mir3059	Enpp7
Alx1	Fam216b
Rassf9	Ncoa1
1700017N19Rik	Gli2
Nts	Glud1
Mgat4c	1700049E22Rik
Gm4340	Gm20757
Slc6a15	Itgb5
Lin7a	Mm2pr
Myf5	Tshz3
Myf6	Tmem17
Mettl25	Cpb2
Ptprq	Slc6a1
Tmtc2	Wt1os
Ppfia2	Tbc1d2
Acss3	Mme
Ccdc59	Dennd6a
Otogl	B3galnt2
Lrriq1	Etv6
Syt1	Tln2
Brcc3dc	Agpat4
9230102K24Rik	Slc19a3
Nav3	Nppb
Tph2	C030018K13Rik
Trhde	Gm10845
Kcnc2	Mir721
Caps2	Grtp1
Atxn7l3b	Ppfibp2
Glipr1l2	Casq2
Glipr1l1	Ndufb9
Lgr5	Dnajb6
Ptprr	Washc5
Tspan8	Dipk1a
Taf7l2	Gsta3
Gm4489	Sh3d19
Avpr1a	Tead4
Slc16a7	9030404E10Rik
Tafa2	Sap30bp
4930503E24Rik	Ofcc1
Or10u4	Adamts9
Neurod4	Ddx47
Or10p22	Kcnq1ot1
Or6c204	Zcchc10
Or6c203	Epgn
Or6c2b	Gm6614
Or6c6	Scarb2
Or6c6c	Ephb2
Or6c5c	Irak3
Or6c66b	Mir365-2
Or6c5	Gm9871
Or6c76b	1700010I02Rik
Or10u3	Slc29a3
Or6c68	Wdfy3
Or6c211	Ctdp1
Or9k7	4921513I03Rik
Or6c8	Dync1li2
Or6c76	Zfp957
Or6c88	Prkn
Or6c207	Fars2
Or6c205	Pcdh8
Or6c202	Ndufs1
Or6c210	Slc4a4
Or6c1b	Ly75
Or6c69b	Dhrs4
Or6c3	Klf10
Or6c215	Xaf1
Or6c213	Jmy
Or6c3b	Tmem230
Or6c212	Mesd
Or6c66	Pitx2
Or6c217	Tmem192
Or6c69c	D630013N20Rik
Or6c69	Msc
Or9r3	Magi2
Or9r7	Zfp827
Or6c33	4930432J09Rik
Or9k2b	Ufm1
Or9k2	C8a
Or6c35	Sdr16c6
Or6c208	Ccnb1
Or6c74	Pitpnc1
Or6c219	Spata6
Or6c216	Dip2b
Or10p21	Hmces
Or6c201	Oxsr1
Or6c38	Zfp704
Or6c209	Bub3
Or6c65	Myh10
Or6c214	Mir6350
Or6c2	Gphn
Or10p1	Gm7609
Or6c1	Nfyb
Or6c75	Bach2
Or6c70	Ugt8a
Or6c206	Gm4632
Olfr765	Kbtbd8
Vmn2r85	Baz1a
Vmn2r84	Map4k3
Vmn2r86	Ankmy1
Vmn2r87	Far1
Tespa1	Tbc1d22a
Abca13	Il6st
Ikzf1	Magef1
Vwc2	Ftmt
Zpbp	Gm12887
Spata48	Clhc1
Vstm2a	Nek7
Pom121l12	Slc10a7
Egfr	Mir6943
Fbxo48	Zfp57
Cnrip1	Ldhd
Plek	Gm31108
Eldr	Atp1b1
4932414J04Rik	Psmg1
Wdpcp	1700096J18Rik
Ehbp1	Esrrg
Gm10466	Zbtb44
5730522E02Rik	4930505K13Rik
Ccdc85a	Kl
Gm12070	Rad21
Fancl	Kdm3a
Vrk2	Arntl
Efemp1	Ets2
Mir216a	Cfh
Mir217	Cdh13
Mir216b	Foxo6
Ccdc88a	Hes1
Eml6	Stn1
4930505A04Rik	Dock2
Acyp2	Tor3a
Asb3	Usp45
Tenm2	AI662270
Gabra1	Tac1
Gabra6	Abhd12
Gabrb2	Gpr107
Gabrg2	Hdac2
Atp10b	AA536875
Adra1b	Fnbp1
Ebf1	Upk3b
Havcr1	Lama1
Timd2	Pkia
Gm4926	Zfp423
Sgcd	Tbc1d2b
Timd4	Cipc
Dppa1	Trpc4
BC053393	Wdr11
Tgtp2	Arid5b
Ifi47	Zfp90
Or2v1	Fgf1
9930111J21Rik2	Capsl
Or2o1	Prim2
Or2v2	Nsmce4a
Or2t26	D16Ertd472e
Gm5431	Bcl7a
Gm12185	Gm38404
9930111J21Rik1	Helz
Or2y1b	Pik3c3
Or2y1c	Mta3
Or2y12	Jup
Or2y1	Dusp16
Or2y16	1700006H21Rik
Or2y1e	4921504A21Rik
Or2y11	Hmgcll1
Or2y1f	Shisal2b
Or2y14	Mgat4e
Or2y15	Cracr2a
Or2y17	Rps6ka2
Or2y1d	Igf2bp3
Or2y10	Clasp1
Or2y13	Mylpf
Glra1	Tbx3
Gria1	Adgrl2
Hs3st3a1	Helt
Dnah9	Ndrg1
Shisa6	Whrn
Nlrp1a	Raf1
Nlrp1c-ps	Ldlrad4
Nlrp1b	Prss36
Or1e17	Mgat3
Or1p1	Id1
Or1e25	Bambi
Or1p1c	Mast4
Or1e36-ps1	Gm23450
Or1e31	Gm29811
Or1e1f	Grid2
Or1e30	4833422M21Rik
Or1e23	Gm12718
Or3a1b	Gpbp1
Or3a1	Mir8118
Or3a1c	Ncor1
Or3a1d	Anpep
Or1r1	Tbc1d1
Or1a1b	Arhgap44
Or1e16	Vac14
Or1e1c	Nuak1
Or1e1	Lrrc4c
Or3a10	Zfp516
Or3a4	Sgms2
Or1e35	Mnd1-ps
Or1e32	Psat1
Or1e34	Irx3
Or1e33	Arhgap28
Or1e29	Mir669h
Or1e22	Cdk19
Or1e26	AU019990
Or1e19	Eif4a2
Or1e21	Gcnt2
Zfp616	Tfap2c
Spata22	Fzd10os
Or1a1	Glra2
Zfp735	1700108J01Rik
Ccl11	Ninj2
Ccl12	Zfp648
Ccl7	Asb1
Ccl8	Gtf3c3
Stxbp4	Wapl
Car10	Wdr75
Kif2b	Dctd
Efcab3	Ccdc121
Marchf10	Gtf2a1
Tanc2	4933416M06Rik
Cep112	Nudcd3
Abca8a	Klhl31
Abca9	Dtnbp1
Abca5	Abca12
Abca8b	Lama3
1700012B07Rik	Platr10
Abca6	Rnf111
Kcnj16	Syndig1
Map2k6	Fndc3b
BC006965	Tigar
Ldah	Lrrc8a
Rdh14	Foxp1
Nt5c1b	Acaca
Rad51ap2	Atp6v0a4
Vsnl1	Ivns1abp
Tubb2a-ps2	Wipi2
Lratd1	Epb41l2
Nbas	Mosmo
Sh3yl1	Kcnh5
Sntg2	Bach1
Ccdc71l	Trmt1
Snx13	Cd81
Prps1l1	Hlcs
Hdac9	Ubald2
Agr2	Clca4a
Agr3	Cdkal1
Etv1	Lonrf2
Meox2	Gm14393
Dgkb	Tmem108
Agmo	Slc25a46
Sostdc1	Pfdn4
Lrrc72	Efnb2
Crppa	Hsd17b3
Scin	Timm8a1
Lsmem1	Galntl5
Dock4	Jakmip3
Lrrn3	Foxd3
Immp2l	Celf4
Stxbp6	Hmga2
Nrcam	Gucy1a2
Nova1	Fundc1
Prkd1	Etl4
3110039M20Rik	Prr5l
Akap6	Tspan18
Npas3	Mtf2
Slc25a21	Fam210b
Mipol1	Glis3
Sstr1	Zbtb7a
Clec14a	Scd1
Ttc6	Lhcgr
Lrfn5	Plk3
Fscb	Kdm5b
Gm17821	1190005I06Rik
Mdga2	Aplp2
Syt16	Atp11b
Kcnh5	Rassf4
Rhoj	Cfap43
Fut8	D830005E20Rik
Gphn	Rfx3
Pals1	Ddb2
Garin2	Ext1
Gm1995	St8sia1
Eif1ad3	Kif5b
Eif1ad4	Gfpt2
Pramel51	A730020M07Rik
Ubl5b	Tesc
Oog1	Dpysl2
Eif1ad15	Tctn1
Eif1ad7	4933402J10Rik
Eif1ad2	Ppp2r5c
Gm7104	Smarca2
Eif1ad8	Gm29684
Dio2	Btg1
Nrxn3	Rexo5
Cep128	Hpcal4
Tshr	Bclaf3
Galc	Nr1i2
Gpr65	Gls
Flrt2	Mia2
1700019M22Rik	Nedd4l
Kcnk10	Stoml1
Fbln5	Mir692-1
Catsperb	Copb1
Tc2n	Ces1h
Kif4-ps	Tgfbr3
Adam6b	Rabgap1
Adam6a	2610035D17Rik
Dync2i1	Plec
Vipr2	Tmem232
Ptprn2	Aldh2
D430020J02Rik	Nrp2
Esyt2	Celf1
Ncapg2	Adgrf5
Dnah11	Pou6f2
Sp4	Atp2a3
Cdca7l	Osbpl10
Tmem196	Snapc3
Macc1	NA
Itgb8	Nmnat2
Abcb5	Lonrf1
Speer6-ps1	Arl6ip6
Akr1c14	Armc9
Akr1c20	1700027F09Rik
Akr1e1	Tcim
Akr1c21	Snord11
Akr1c6	Pxk
Adarb2	C77080
Chrm3	Gm11110
Ryr2	4933406J10Rik
Zp4-ps	Cst13
Prl2c5	Ccdc122
Prl2c2	Asns
Prl2c3	Fut9
Hecw1	Prss48
Gli3	Nfkbia
Inhba	Ankib1
Sugct	Tcf4
Pou6f2	Dock4
Vps41	Gm14164
Amph	Serpinb3b
Gpr141b	Bcl2l11
Gpr141	Bmp6
Nme8	Nufip2
Elmo1	Mir692-2
Aoah	Serpinb3d
Or2w1	4933427E13Rik
Or2ad1	Fut8
Or2p2	Echdc2
Vmn1r223	Atf2
Vmn1r196	Rmst
Vmn1r221	Asah1
Vmn1r-ps103	Cox7c
Vmn1r200	Mlxip
Vmn1r199	Dlg5
Vmn1r214	Eri3
Vmn1r213	Mapk6
Vmn1r206	Insyn2b
Vmn1r205	Lmna
Vmn1r208	Nupl2
Vmn1r215	Neat1
Vmn1r198	Rin3
Vmn1r201	Ints4
Vmn1r218	Nap1l1
Vmn1r195	N4bp1
Vmn1r202	Aff1
Vmn1r193	Frmd4b
Vmn1r210	Sec61g
Vmn1r203	Tox3
Vmn1r220	Dsel
Vmn1r219	Tmprss11d
Vmn1r217	Hspa12a
Vmn1r222	Adcyap1
Vmn1r212	Nup98
Vmn1r211	Zfp706
Vmn1r197	Camk1d
Vmn1r216	Ap3s2
Vmn1r189	Lin54
Vmn1r192	Tagap
Vmn1r188	Tmem179
Vmn1r207	Palld
Vmn1r209	4932702P03Rik
Vmn1r194	2310039L15Rik
Vmn1r191	Arl4a
Vmn1r204	Cfap206
Dcdc2a	Dpf3
Nrsn1	Zfp277
Prl8a2	Eppk1
Hdgfl1	Ssbp3
Prl3d1	Tmem248
Prl3b1	Tigit
Prl7d1	Barx2
Prl	1700027A15Rik
Prl4a1	Cops5
Prl6a1	Mir1192
Prl8a6	4930545L23Rik
Prl7a1	Cdh17
Prl7a2	1700016C15Rik
Prl3d2	Larp4b
Prl3d3	Tex2
Prl3c1	Arid1b
Prl5a1	Tmsb10
Prl2a1	Cradd
Prl2b1	E230016M11Rik
Prl2c1	Nudcd2
Prl3a1	Olfr761
Prl8a9	Gm14015
Prl7c1	Tm4sf1
Prl8a1	Siah1a
Prl8a8	Lcmt1
Prl7b1	Brd1
Gmds	Klk7
Mylk4	Plekhf2
Serpinb6b	Thumpd3
Serpinb9c	Robo1
Serpinb9f	1300002E11Rik
Serpinb9e	Ppp1r9a
Serpinb9d	Kctd12
Serpinb6d	Nol6
Serpinb6e	Agpat2
Serpinb9g	Drd3
Serpinb6c	Rnf19a
F13a1	Dclk2
Ofcc1	Dok5
Ctsq	Akirin2
Cts8-ps	Atf1
Tpbpb	Med13l
Cts3	Xxylt1
Ctla2a	Olfr267
Ctla2b	Tmem210
Tpbpa	Pcmtd1
Ctsj	Synj2
Cts7	Gm10790
Cts8	Suco
Ctsr	Mtus2
Cts6	Gpx2
Ctsm	C2cd4b
Adcy2	Jun
Adamts16	Clec16a
Cast	Anapc7
Pcsk1	Hs3st2
Mir682	Mcc
Erap1	2310043M15Rik
Rfesd	Sik1
Rhobtb3	Dact1
Spata9	Gpr22
Slf1	Idh2
Fam172a	Slc44a3
2210408I21Rik	Slc13a2
Pou5f2	Nsf
Mctp1	Rps6ka1
Adgrv1	Ssr3
9330111N05Rik	4930543N07Rik
Cetn3	Bmp4
Mef2c	Spata31d1a
Rasa1	Aoah
Tmem161b	Il17f
Hapln1	Spc24
Vcan	2700054A10Rik
Edil3	Mob3a
Xrcc4	Hmgxb4
Atg10	Galnt2
4833422C13Rik	Prickle2
Ssbp2	BC064078
Acot12	Marcksl1
Ckmt2	Slc1a3
Rasgrf2	Nipsnap3b
Naip1	Ush2a
Naip2	Sulf1
Naip5	Sh3rf2
Naip6	Mir290a
Naip7	Mir6398
Mast4	Fbxo44
Erbin	Arl14
Adamts6	Apol7d
Cwc27	Pltp
Rgs7bp	Strit1
Nt5el	Pcgf6
Rnf180	1700006F04Rik
Htr1a	Ptbp3
Pde4d	Dusp22
Mir582	D430020J02Rik
Plk2	Pde9a
Gapt	Dpys
Actbl2	Capn5
Rab3c	Tmem45b
Itga1	Rad1
Itga2	Mgat4c
Parp8	Zfp931
Emb	Gm28856
Hcn1	Cdk7
Fgf10	1810013L24Rik
Nnt	Rab12
Gm10406	Gm11468
Gm2897	Fblim1
Gm3002	Mtbp
Gm3020	Tspan5
Gm3696	Rad23b
4930555G01Rik	Zdhhc17
D830030K20Rik	Mtf1
Gm5796	Tmem201
Gm5797	Mcu
4933406F09Rik	2900052N01Rik
Cfap20dc	A830082K12Rik
Mnd1-ps	Prpf40a
Fhit	Pigz
Cadps	Bsph2
Gm5087	Tnfaip6
Synpr	Zfp771
Sntn	Ndc1
Il3ra	Cog2
Or2t1	Bcas3
Or2t6	BC016579
Lrrc3b	Alpl
Thrb	Zfp36l1
Rarb	Mrm3
Ube2e2	Gm15706
Gm5458	Rhof
Grid1	Dera
4930474N05Rik	Basp1
4930596D02Rik	Creb1
Nrg3	Pramel7
Mat1a	Rbfox2
Mbl1	Ankrd28
Sftpa1	Ptprd
Dydc1	Cxcl17
Gm10375	Fign
Ang3	Zfp263
Ear1	Npc1
Ear2	Znrf1
BC061237	Bend5
Ang5	Has3
Ear12	Trpm3
Ang6	Cyp4f13
Gm8267	Dmtn
1700001F09Rik	Tmem39a
4930503E14Rik	Sel1l
Ear10	Vgll4
Ptger2	Strbp
Gpr137c	Ctnnd2
Or11g27	Rrs1
Tlr11	Fer
Or11g2	Capza3
Or4q3	Pdgfc
Or4k1	Mbd2
Or11h23	Calm2
Or11g25	Pcsk1
Or11h4b	Spin1
Or4k5	2410137M14Rik
Or11h7	3830408C21Rik
Or11h6	Veph1
Or4k15c	Got2
Or4k15b	Zfp345
Or4k15	Pum1
Or4k6	Epb41
Or11g26	9630028H03Rik
Or4l15	Gm32921
Or4k2	Rybp
Or4n5	Pbx4
Or4n4b	Tank
Or4m1	I0C0044D17Rik
Or4n4	Sash1
Or11j4	Mir3066
Or11g7	4930555K19Rik
Or11g1	Enah
Or11g24	Ptdss2
Or4l1	Adgrd1
Or11h4	Adamts14
Ang4	Kif13b
Vmn2r89	Adrb1
AY358078	Tbl1xr1
Gm5622	Rap2b
Gm5800	Hemk1
Vmn2r88	5031425F14Rik
Or10g1b	Ndufaf5
Or10g1	Mta1
Or4e5	Gm7977
Or4e1	Mapre3
Or4e2	Kidins220
Adam7	Tmc7
Adam28	Mtch2
Stc1	Actl7b
Adamdec1	Cops8
Lrrc63	Kirrel
Pcdh17	Gm14812
9630013A20Rik	Gsx2
Olfm4	Mgme1
Diaph3	1700025G04Rik
Tdrd3	Litaf
Pcdh20	Nrip3
Gm5088	Dtd1
Dach1	Kyat3
Pcdh9	Dixdc1
Spertl	Rprl1
Klhl1	C8b
Tbc1d4	Ankrd13c
Prr30	Mir6352
Lmo7	Wwox
Mycbp2	Bcl2l1
Scel	Krt42
Ednrb	Osbpl6
D130009I18Rik	Ano4
Obi1	Ndufaf2
Trim52	Abca15
Slitrk6	Pigx
Slitrk5	Esp8
Slitrk1	Naa60
Gpc5	Plpp1
Gpc6	Pdia3
Oxgr1	Cpe
Hs6st3	Itpkb
Uggt2	Lif
Pcca	Slc15a5
Ggact	Msi2
Tmtc4	Elovl6
Fgf14	Rapgef2
Itgbl1	Bmp7
Nalcn	B930018H19Rik
Ccdc152	Vwa3b
Ghr	Ptpn23
C6	Slco4a1
Mroh2b	Mir6516
Plcxd3	Malat1
Oxct1	Ldlrad3
C9	Loxhd1
Dab2	B4galnt3
Ugt3a1	Cdca7
Ugt3a2	Cabin1
Il7r	2700081O15Rik
Prlr	Fxyd4
Agxt2	Tiparp
Spef2	Gm45521
Adamts12	Ankrd6
Cdh6	Iyd
Cdh9	Cadm2
Cdh12	Mms22l
Cdh18	Plxnb3
Cdh10	Zhx2
Hnrnpa1l2-ps2	Ajap1
Acot10	3110056K07Rik
Marchf11	Immp1l
Fbxl7	Col18a1
Dnah5	Nsun3
Ctnnd2	Palm3
Tas2r119	Spag17
Sdc2	1110051M20Rik
Sema5a	Bcl2l14
Tspyl5	Rnf168
Cpq	Pisd-ps3
1700084J12Rik	Gm2721
Zfpm2	Tcl1
Oxr1	Ap2a2
Angpt1	Fam20c
Rspo2	Ncoa3
Tmem74	Arhgap32
Emc2	Mir3473f
Trhr	Chst10
Pkhd1l1	2310043L19Rik
A930017M01Rik	Ino80c
Csmd3	Nanos3
Sybu	Ptk2b
Ebag9	Arap1
Kcnv1	Slc1a1
Trps1	Aldh3b2
Slc30a8	Mpp7
Med30	Arhgef2
Samd12	Pparg
Mal2	Cobl
Ccn3	Rsf1os1
Tnfrsf11b	Ralyl
Enpp2	Dhx57
Colec10	Herc4
Col14a1	Fam136a
Sntb1	Foxc1
Has2	Gpa33
Slc22a22	Ablim2
Has2os	Rassf8
4933412E24Rik	Dab2ip
A1bg	Pex2
Pvt1	Pcdh15
Gsdmc	Exoc4
Adcy8	Rem2
Kcnq3	Smim38
Sla	Klf3
Tmem71	Lbx1
Tg	Bnc2
Phf20l1	Pdcl2
Dnaaf11	Pros1
Zfat	Ifnar2
Khdrbs3	Eif3m
Col22a1	Aox2
Fam135b	Syt7
Syt10	Kank4os
Kif21a	2900041M22Rik
Spn-ps	Kcnh1
Cpne8	Tex35
Cntn1	Xpr1
Smgc	Trio
Slc2a13	Olfr821
Muc19	Dgke
Pdzrn4	Frk
Abcd2	Tead1
Lrrk2	Nampt
Adamts20	Tdh
LOC100043315	Dnase2a
Tmem117	Sars
Nell2	Gpat4
Glycam1	B020004C17Rik
Or1f19	Wdr70
Rbfox1	Plaur
Snai2	Fam20a
A630010A05Rik	Macrod2
Clxn	Ppfia2
Lamp3	Zfp532
Or2aj4	Ism2
Or2l13b	Pecr
Or2m12	Fgf4
Or2m13	Prelid2
Or2l5	Ehf
Or2aj5	1700095B10Rik
Or2aj6	C430042M11Rik
Or2l13	Rpia
Lpp	Csnk1e
Tprg	Galr1
Tmem207	Gm32200
Cldn16	Ripply3
Cldn1	Cyp3a13
Il1rap	Sdhaf4
P3h2	Xrn1
Trp63	Nuf2
Gm10823	Chrd
Fgf12	1700108F19Rik
Uts2b	Homer2
Ostn	Tjp2
Ccdc50	Pip5k1a
Mir690	Ttc8
Atp13a4	Mettl15
Atp13a5	Eif4g1
Plaat1	Tef
Stxbp5l	Nup210
Polq	Eaf1
Lsamp	Notch1
Ndufs5-ps	Mb
Zbtb20	Gm15501
Cd200r4	Serpinb6c
Cd200r2	Mcf2l
Cd200r1	Sod1
Cd200r3	9430078K24Rik
Cd200	Nynrin
Btla	F11r
Cd200l1	Map7
Slc9c1	Mir6356
Atg3	Cyp39a1
Phldb2	Eaf2
Plcxd2	Tmem135
Cd96	Spats2l
Nectin3	Cacybp
Dzip3	Psd4
Retnlg	Shox2
Retnla	Fyb
Retnlb	Kifc3
Trat1	Dsg2
Myh15	Mrps6
Dubr	B230206H07Rik
Ccdc54	Kif18a
Alcam	Brinp3
Cblb	Bmp2
Zpld1	Clic5
Tfg	A930031H19Rik
Impg2	Gm17634
Adgrg7	Pdzrn3
Abi3bp	Elk4
Tmem45a	Crtac1
Senp7	Eif2s2
Tmem45a2	Baiap2
Col8a1	Agfg1
Ftdc1	Gpr183
Or5ac23	Kir3dl1
Or5h25	Dnajc24
Or5h23	Abcb10
Or5ac16	Lyplal1
Or5k16	Mapk10
Or5h18	Lats2
Or5h19	Twistnb
Or5h22	Ccnd3
Olfr197	Nr2c1
Or5h17	Jag1
Or5ac21	Nme9
Or5h26	4933405E24Rik
Or5ac24	Spen
Or5ac22	Gpx4
Olfr176	Dcaf5
Or5ac19	Eda2r
Or5ac20	Txndc2
Or5k15	Mir6358
Or5k3	Zfp518b
Or5k17	Dad1
Or5k1	E330020D12Rik
Or5k1b	Cth
Or5k8	4930558J18Rik
Gabrr3	5033403H07Rik
Olfr192	Mboat2
Or5ac17	Themis
Olfr209	Fam189a1
Or5ac15	D630039A03Rik
Nsun3	Slc12a4
Epha6	D830032E09Rik
Epha3	Ucn3
Pros1	Sema3e
Csnka2ip	Rabl2
Htr1f	Pepd
Pou1f1	Commd1
Chmp2b	Alkbh3
Speer2	Taf15
Cadm2	Otoa
Vgll3	Lama5
Gbe1	Pfdn1
Robo1	Bbx
Hspa13	Phip
Rbm11	Plce1
Robo2	Mief1
Lipi	Klf2
Mir691	Mir3068
Nrip1	Fnip2
Samsn1	Evl
Usp25	Zfp882
Mir99a	Vangl1
Mirlet7c-1	Castor2
Mir125b-2	Gadl1
Mir99ahg	Ift52
Ncam2	Capzb
Tmprss15	Cbx7
Chodl	1700065L07Rik
App	Dlgap5
Cyyr1	Fam92a
Adamts5	Nkx6-1
Grik1	Plekhm1
Cldn17	Spire1
Krtap24-1	Nf2
Krtap27-1	Cbr3
Cldn8	Immp2l
Krtap26-1	Smarca5
2310079G19Rik	Lhx6
Gm10229	Rai14
2310034C09Rik	Dennd1c
Krtap11-1	Psen1
Krtap13	Ice1
Krtap6-1	Cst3
Krtap6-2	Trpv1
Krtap8-1	Edem1
Krtap19-5	Mir7007
Krtap19-2	Ippk
Krtap19-4	Cpa6
Krtap21-1	Hoxd13
Krtap19-1	Tmem220
Krtap19-9b	Rgs22
Krtap14	Sh3tc1
Krtap15	2810001G20Rik
Krtap20-2	Map3k7
Krtap6-5	Dmac1
Krtap22-2	Ednra
2310057N15Rik	Zfp970
Krtap7-1	Spp1
Krtap16-3	Tnip1
Krtap19-3	Dmrt1i
Nox3	Ptpn3
Vmn2r90	Ino80
Fpr-rs4	Sgms1
Fpr3	Stk39
Vmn2r95	Kcnj16
Vmn2r92	Cyb561
Vmn2r93	6030466F02Rik
Vmn2r91	Mir719
Vmn2r94	Camk2n1
Vmn2r104	Tmcc1
Vmn2r98	5730420D15Rik
Vmn2r102	Sdccag8
Vmn2r96	Mir7089
Vmn2r97	Tmem156
Vmn2r100	Src
Vmn2r101	Thada
Vmn2r103	Slc17a9
Vmn2r99	Mir7048
Fpr-rs3	Sigirr
Vmn1r229	Wtap
Vmn1r226	Hhla1
Vmn1r228	Sorcs3
Vmn1r232	Grin2a
Vmn1r225	Lrig1
Vmn1r227	Dock5
Vmn1r231	Mfsd6
Vmn1r230	Klhdc4
Vmn2r107	9530052C20Rik
Vmn2r106	Plcd3
Vmn2r110	Clrn3
Fpr-rs6	Arhgef10l
Vmn2r105	Cmas
Vmn2r108	Tmtc2
Vmn2r109	Mtcl1
Vmn1r224	Psmd7
Vmn1r233	Aldh3a2
Vmn1r234	Dennd2a
Vmn1r235	Mreg
Vmn1r237	Rps4l
Vmn1r236	Casc4
Zfp677	A530046M15Rik
Zfp54	Ino80d
Zfp948	Tcf12
Zfp983	Mir6349
Gm16386	Nt5e
Zfp947	Crybg2
Vmn2r111	Rasgef1a
Zfp758	Ehmt1
Zfp40	Gm38509
Zfp945	Flacc1
Zfp944	Trim26
Zfp229	Rapgef4
Vmn2r113	Zfhx2
Vmn2r112	Cpne4
Vmn2r-ps129	0610043K17Rik
Zfp942	Slco5a1
Zfp946	Echdc1
Zfp943	Rras2
Zfp820	Gm13034
Vmn2r116	Tanc1
Vmn2r117	Rcn1
Vmn2r115	Birc6
Vmn2r114	Rasa1
H2-M10.3	Snx2
H2-M9	Nod1
H2-M10.4	Dse
H2-M11	Capn2
H2-M1	H2bc21
H2-M2	Eif3k
Or12d15	Sft2d2
Or14j4	Chmp6
Or12d16-ps1	Lmntd1
Or12d14-ps1	Jade1
Or14j8	B230303A05Rik
Or10al3	Cnn3
Or14j9	Rad51b
Or12d2	Fam78b
Or2g25	Itgav
Or14j3	Zfp846
Or10al6	Gm12298
Or14j2	St8sia6
Or14j1	Vsig8
Or5v1	Sucla2
Or14j6	Dusp6
Or1o11	Rab3ip
Or1o1	Krtap20-2
Or1o4	4930443O20Rik
Or10al5	Gm36908
Or2g1	Sntg1
Or10al4	4930431P22Rik
Or14j10	Prdm1
Or12d13	Six4
Or12d12	Vtcn1
Or12d17	BB123696
Or14j5	Actn1
Or2b4	Fbxo15
Or14j7	Anxa4
Or10al2	Cyp4a10
Or5v1b	Dapk2
Esp36	Creb3l2
Esp31	Parvb
Esp34	Gm20740
Esp4	Ifitm2
Esp8	Ptprf
Esp23	Mgat5
Crisp1	4930459C07Rik
Crisp3	Kcnn2
Or2n1e	Btbd11
Pgk2	Gsta4
Rhag	Fnbp1l
Crisp2	Adam10
Or2h15	Adgrb1
Or10al7	1110065P20Rik
Or2n1c	Ankrd11
Or2g7	Tc2n
Or2j3	Gm10857
Or2n1d	Cyp3a44
Or2n1b	Insyn2a
Or2n1	Mctp1
Or2y3	2025-09-09
Esp6	Ccdc59
Esp1	Rnf220
Opn5	Atp7a
Adgrf2	Smu1
Ptchd4	Arhgap23
Adgrf4	Sipa1l2
Supt3	Serpini2
Runx2	Aldh1a2
Dazl	Slc6a20a
Satb1	Dab2
Plcl2	Platr26
Tbc1d5	2310022A10Rik
Kcnh8	Dcaf12l1
Efhb	Cwh43
Zfp119a	Mir101b
4932415M13Rik	Deptor
Zfp959	Gm26685
St6gal2	Gdpd5
Vmn2r118	Nod2
Adgre4	Hk1
Slc5a7	Enc1
Sult1c2	Stmn1
Pot1b	Gm13986
Efna5	Slc27a1
Adgre1	Arhgap8
Vmn2r120	Actg1
Cntnap5c	St6galnac2
Nudt12	Myo10
Pdzph1	Frmd4a
Fbxl17	Mir568
Man2a1	Creld2
Tmem232	Rhobtb1
Ptprm	Bcar1
L3mbtl4	Cited2
Dlgap1	Mdga1
Alk	Olfr976
Smchd1	Ghitm
Capn13	Sox6
Galnt14	Tada2a
Ltbp1	Inha
Gm4710	Flrt2
Slc8a1	Nme7
Fshr	Trmt13
Lhcgr	Gm13889
Nrxn1	Pomp
Gtf2a1l	Lgals12
Adcyap1	Ndrg4
Mkx	2810405F15Rik
Odad2	Kif24
Mpp7	Lrrc74b
Aqp4	Rap1gap2
Chst9	Snx17
Cdh2	Usp24
Dsc1	Zfp804b
Dsc2	Aasdhppt
Dsc3	Rora
Dsg1a	Mir7049
Dsg4	Clec14a
Dsg1c	Pdlim5
Dsg1b	Ucp2
4921533I20Rik	Gemin8
Dtna	Dusp27
Asxl3	Plcg1
Klhl14	Pef1
Nol4	1700044K03Rik
Ccdc178	Upk1b
Rit2	Etfa
Syt4	Gm17746
Pcdha1	Klhl8
Vaultrc5	Igsf3
Gm37013	Eogt
Pcdha4	Dppa5a
Pcdha6	Cdc42bpa
Pcdha7	Slco1b2
Pcdha5	H2al1k
Pcdha11	Mga
Pcdha10	Cmtm3
Pcdha9	Hvcn1
Pcdha3	Hunk
Pcdha12	Olfr129
Pcdha2	4930554G24Rik
Pcdha8	Tbc1d23
Nr3c1	4930461G14Rik
Pabpc2	1700031L13Rik
Kctd16	Sorl1
Stk32a	Myo1e
Ppp2r2b	Sik2
Gm10267	Ppp1r12a
Scgb3a2	Tpx2
Npy6r	Def8
Dpysl3	Katnal2
Gm94	Ss18
Spink14	Ang2
Spink6	Nrf1
Spink11	Lin7c
Spink5	Ube2l6
Jakmip2	Faxc
Spinkl	Ybx3
Spink12	Chn1
Kcnn2	Gm10516
Sema6a	Naf1
Commd10	Map2k6
Gm5095	Btbd7
1700044K03Rik	Ube2q2
Hsd17b4	Cyp2s1
Fam170a	Kit
Pudp	Slc28a1
Ftmt	4930448C13Rik
Prr16	Upb1
Gykl1	Cerkl
Lox	Ip6k3
Zfp474	Sgo2b
Sncaip	Slc7a7
1700034E13Rik	Slc35f4
Gm10536	Acap2
Marchf3	Kalrn
Megf10	Grk2
4930511M06Rik	Lig1
C330018D20Rik	Zfp273
Ctxn3	Qrich1
1700066O22Rik	Prep
Ccdc192	Rpe65
Fbn2	Txndc5
Slc27a6	Btg3
Minar2	Eif2d
Gm4841	Trim8
Adamts19	Nobox
Gm4951	Fat3
F830016B08Rik	Gskip
Iigp1	Vmn2r-ps54
Chsy3	Fbrsl1
Htr4	Mdfi
Spink13	Macroh2a1
Spink10	Vrk2
Spink7	Sh3pxd2a
Piezo2	Ptpn12
Mc4r	Gm17767
Mc2r	Epop
Ccdc68	Ccdc141
Dynap	Qars
Rab27b	Ly86
Dcc	Platr22
Setbp1	Kcnj2
Slc14a2	Snx30
Cbln2	Aven
Cd226	Afdn
Rttn	Srrm4
Neto1	Aox4
Socs6	Eomes
Dok6	Mir7233
Slc22a27	Slc7a5
Slc22a19	Gna15
Slc22a26	Ddit4l
Slc22a29	Ect2
Slc22a30	Inmt
Slc22a28	Bdnf
Plaat5	Mir6387
Ms4a8a	Fry
Ms4a20	Glo1
Ms4a19	Abhd2
Ms4a13	Tfap2a
Ms4a7	Cyp26b1
Ms4a2	Nhlrc3
Cblif	Arhgap27
Ms4a3	Plbd1
Oosp1	Gpd2
Oosp2	Gm13580
Oosp3	Plekha7
Ms4a4b	Nr0b1
Ms4a4c	Rac1
Ms4a4d	Sim1
Gm8369	Ube2r2
Ms4a6d	Spata31d1b
Ms4a6b	Dennd2c
Ms4a6c	Yars
Or5an1b	Parp1
Or5an9	Pmepa1
Or4d6	Rabif
Or4z4	Trhde
Or5a1	Adam12
Or5an6	Gss
Or5an1	Pign
Or5an11	Pde7a
Or5an10	Map2k3os
Or5an1c	Nudt12os
Or4d10c	Pptc7
Glyat	Cenpu
Gm4952	Gm32926
Or5b94	Lgr4
Or5b95	Lmx1a
Keg1	Mkrn1
Or9q1	Taf1b
Or10w1	Kctd1
Or5b109	Snca
Or5b111	Larp1
Or5b118	Nkx6-2
Or9i1b	Fam160b1
Or5b116	Lamc1
Or5b122	Calr4
Or5b119	4930484H19Rik
Or5b107	Mtfr2
Or5b24	Dnm2
Or10q12	Appbp2os
Or10q1b	Prune2
Or5b98	Manbal
Or5b104	Mnx1
Or9i2	Xiap
Or9i16	Chd7
Or5b124	Rilpl1
Or5b123	Lrp6
Or5b106	Btbd9
Or5b117	Zfp825
Or5b113	Tyrp1
Or5b102	Gm5570
Or5b108	Avpr1b
Or5b112	Mindy1
Or5b3	Tsn
Or5b120	Tmem38b
Or5b12b	Kremen1
Or5b101	Wdr78
Or5b12	Bdh1
Or5b21	Sh3tc2
Or5b97	Tox
Or5b96	Trps1
Or5b99	Ccnc
Or9q2	Gm20611
Or9i14	Gm525
Or9i1	Enpp1
Or1s2	Dhx58
Or10q1	4930404A05Rik
Or5b121	Coro1c
Gm5512	Hpgd
Pcsk5	Dmxl2
Aldh1a1	Gramd1b
Tmc1	Mir8110
Anxa1	Acsl6
Trpm6	Gbx2
Rorb	Mir183
Aldh1a7	Slc5a9
E030003E18Rik	Gjd4
Gda	Rprl2
Zfand5	D730003I15Rik
Trpm3	1700019M22Rik
Mir204	Neo1
Snora19	St6galnac3
Rfx3	1700034H15Rik
Prkg1	Rpl10l
Gm6642	Baz2b
Asah2	Ncoa7
A1cf	Uvrag
8430431K14Rik	4930543E12Rik
Lipo3	Mir7011
Rnls	Ccz1
Lipk	Ccdc57
Ankrd22	Tob1
Lipf	Irf4
Lipn	Pja1
Lipm	9330188P03Rik
Fas	Mroh7
Ifit2	Cnot2
Ifit3	AU040320
Ifit3b	Susd1
Ifit1bl1	Slc45a2
Slc16a12	Ash2l
Htr7	Zswim4
Hectd2	Il20ra
Hectd2os	Pla2g12b
Cyp2c69	Arglu1
Cyp2c50	Ing3
Cyp2c29	Mir3961
Cyp2c37	Mmrn1
Cyp2c38	Rbm28
Cyp2c39	Lgals3
Cyp2c40	Lmnb2
Cyp2c70	Mvb12b
Cyp2c54	Dck
Cyp2c68	Nav1
Cyp2c67	Nfatc2ip
Cyp2c53-ps	Gas2
Cyp2c66	Gm15217
Cyp2c55	Tfeb
Cyp2c65	Mettl14
Hpse2	G6pd2
Sorcs3	Kcnd3os
Ins1	Gm20544
Sorcs1	Myo6
Rab11fip2	Hnrnpf
Grk5	Gm10778
Celf2	Anxa2
5031426D15Rik	Myc
Mir467d	Abcd3
Mir297a-3	9530002B09Rik
Mir466g	Cps1
Mir669k	Itgal
Mir669i	Ttc39b
Mir669j	Fcgr2b
Mir669g	Pde1a
Mir669e	Efcab14
Mir669h	Magi3
Mir669m-2	Mybpc3
Mir466o	Jdp2
Mir669p-2	Sema5b
Mir669p-1	Ube2n
Mir467a-7	Cry1
Sfmbt2	Evi5
Mir466	Dner
Mir669b	Vmn2r74
Mir669a-1	Smpd3
Mir467b	Mir5120
Mir669a-2	Rad18
Mir669a-3	Xrcc5
Mir669c	Prkcb
Mir297b	Zfyve1
Prkcq	Fbxo42
Pter	Atrnl1
Rsu1	Gm12159
C1ql3	Hps1
Itga8	Fam117b
Mindy3	Ccn2
Cubn	Olfr1122
St8sia6	Jarid2
Hacd1	Zfhx3
Mir511	Myo1f
Cacnb2	Epcam
Mrc1	Uqcc1
Slc39a12	Sh3gl2
Tmem236	Man2b2
Plxdc2	4931406C07Rik
Nebl	Gm5092
Nsun6	Atg4c
Arl5b	Ncam1
Armc3	Gm12338
Etl4	Syt9
Gpr158	Hmgb1
Myo3a	Dhrs2
Gad2	Pwwp2a
Apbb1ip	Dscam
Hnmt	Nup35
Il1rn	Cldn11
Nxph2	Mlip
Il36g	Slc30a6
Il1f10	Gm7550
Tbpl2	Cln6
Il36a	Myo3b
Il36rn	Ptprj
Il36b	Zc3h3
Potegl	Piga
Spopl	Slc24a5
Or1j1	Gm13056
Or1j21	Mir5100
Or12k5	Igfbp3
Or1af1	Nfe2l2
Or12k8	1190028D05Rik
Or5c1	Gm10575
Or12k7	Mir6372
Or1q1	Armcx1
Or1ak2	Upf3b
Or1l8	Kank1
Or1j4	Mtdh
Or1j15	Baiap2l1
Or1l4	Rnpc3
Or1j17	Cndp2
Or1n2	Ptar1
Or1j20	Sorcs1
Or1n1b	Myh9
Or1n1	Eif4e1b
Or1j18	Cdh9
Or1j19	Cd163l1
Or1j16	Snx19
Or1j10	Nid1
Or1j14	Rpl38
Or1j11	Socs3
Or1j13	Zmym2
Or1j12	Gpr25
Or1b1	Rhbdd2
Or7c74	Creld1
Kynu	Camk2d
Arhgap15	Kirrel3
Lrp1b	Gm7904
Gtdc1	Csn1s2a
Mbd5	Mirg
Lypd6	Snx16
Lypd6b	Gls2
Gm13498	Osmr
Tas2r134	Gemin6
Kcnj3	Rab27b
Galnt13	Ezr
Cytip	Gm20758
Galnt5	Elovl7
Acvr1c	ccdc198
Ermn	Rbmxl2
Tank	Atp10b
Dpp4	Aldh18a1
Fap	Rtbdn
Gcg	Slc39a14
Ifih1	Tenm3
Slc4a10	Hs3st5
Kcnh7	Gata3
Gca	Elac1
Cobll1	Gm28269
Slc38a11	Arfgap3
Grb14	Lpgat1
Fign	Erh
Scn3a	Cntn5
Gm13629	Magi1
Scn2a	Gm3716
Galnt3	Gm32461
Scn1a	Muc4
Scn7a	Limk1
Scn9a	Daam1
Xirp2	Npr3
B3galt1	0610040F04Rik
Gm1322	1700067G17Rik
Ttc21b	Olfr76
Csrnp3	Bmp2k
Stk39	Fignl2
4933409G03Rik	Ino80dos
4932414N04Rik	Dsp
Pde11a	Foxp4
Zfp385b	Gjb5
Cwc22	Eps8
Ube2e3	Aars2
Gm14461	1700054M17Rik
Itga4	Slc9a4
Cerkl	Kctd8
Pde1a	4930440I19Rik
Prdx6b	Bbs9
Itprid2	Apbb2
Ppp1r1c	Gm46993
Zfp804a	Plekhg5
Fam171b	Rec114
Gm13695	Syt14
Calcrl	Tbc1d8
Gm13698	Tmem60
Gm13697	Actrt2
Zswim2	Piezo1
Prg2	Syde2
Prg3	Dok2
Or8u8	Rbfox1
Fads2b	Cldn14
Or5t17	Usp46
Aplnr	2700089I24Rik
Lrrc55	Gxylt1
Or10ag54	Abi1
Or8k28	Lcorl
Or5g23	Gprc5c
Or5m12	4930405J17Rik
Or5t18	Nabp1
Or9g20	Gm12866
Or5m8	Samm50
Or8k39	Lrba
Or5m11	Yeats2
Or5al1	Mical3
Or5al5	Tmem126b
Or5ak4	Nxph3
Or8k21	Ahnak
Or5be3	Trim71
Or5m11b	4930587E11Rik
Or5ak20	Tyro3
Or5m9	A530053G22Rik
Or8k37	Bcl2a1c
Or5m9b	Prg3
Or9g10	Mir378a
Or10ag53	1700116B05Rik
Or12e9	Gm19276
Or10ag2	Extl3
Or5t9	Ski
Or5t5	Cacna1a
Or8k24	Nup54
Or8k41	Atxn7l3b
Or8k30	Nanog
Or8k32	Slc44a1
Or8k27	A430090L17Rik
Or8k33	Bdkrb1
Or5ak24	Rlbp1
Or5ak25	Srprb
Or5ak23	Acot4
Or5g29	Armc2
Or5g27	Akr1e1
Or9g3	Rufy3
Or9g8	Spef2
Or9g4	Usp53
Or9g4b	Patj
Or5g9	Lifr
Or5g25	Chd6
Or5al7	Nppc
Or5m3b	Nxph1
Or5m3	Kctd3
Or5ap2	Cnnm1
Or8k1	Spire2
Or5m13b	Haglr
Or2ah1	Acer3
Or5m10	Cacnb3
Or5m5	Slc45a3
Or5m10b	Ctnna1
Or8k38	Resf1
Or5t16	Med28
Or5t7	Sun1
Or5as1	P4ha2
Or8h10	Myo18a
Or12e1	Mirt1
Or5t15	Snx10
Or5j1	Bri3
Or9g19	Plxdc2
Or5aq6	Gm6116
Or8i2	Ephb3
Or8h9	1700012I11Rik
Or5aq1	Tgif1
Or5aq7	Acot9
Or12e7	Srsf6
Or8h7	Garem1
Or5aq1b	Mog
Or8h8	Dock10
Or8k3b	Nudt21
Or8k40	Ythdc2
Or5ak22	E130114P18Rik
Or8k16	Nfib
Or5j3	Mir1951
Or8u9	Bbs10
Or8k3	Arhgap22
Or8u3-ps	Plcb4
Or8k17	Cdh1
Or5ar1	Mt1
Or8k18	Efcab5
Or8j3	4930529C04Rik
Or8k23	Fxn
Or8k22	Gstp2
Or8k25	Cbfa2t2
Or8k53	Mcl1
Or10ag58	St18
Or12e8	Mettl4
Or10ag57	Gm31938
Or8j3c	Nostrin
Or8u10	Sema3d
Or5g26	Tmem229a
Or5al6	4930470O06Rik
Or8k20	Ldhal6b
Or8j3b	Dock1
Or8k36-ps1	Reep3
Or10ag52	Il7
Or10ag56	Erbb4
Or8k35	Lims1
Or8k31-ps1	Svil
Or5d18	Eya4
Or5d47	C1qtnf9
Or4b1d	Tbc1d13
Or4c58	Fyn
Or4a67	Ccn6
Or4c15b	Hbegf
Or4a76	Olfr339
Or4c15	Bank1
Or4p20	Slc16a7
Or5w14	Asxl1
Or5w19	Ywhaz
Or5d14	Npm3-ps1
Or10ag59	Mpv17l
Or4p21	Rxra
Or4c117	Susd6
Or4p7	Ttc7b
Or4c3	Ddx54
Or12e13	Pvt1
Or4c107	Dubr
Or5w18	Pax1
Or5d39	4930578M01Rik
Or12e10	4930581F22Rik
Or4c124	Rbck1
Or4x13	Ago2
Or4c12	Depdc1a
Or4x6	Nrep
Or4x11	Lipk
Or5w1b	Pde5a
Or4a80	Marcks
Or4c1	Gm5083
Or4a69	Cnnm2
Or4c104	Rsl24d1
Or4c110	Serp2
Or4c29	Hsd17b11
Or4c105	Vstm2l
Or4c106	Rgs3
Or4a66	Sgk2
Or4c126	Rundc3b
Or4a81	Zfp42
Or4c31	Plekhm2
Or4c100	Scml4
Or5d40	Gm36201
Or5d41	Mir28c
Olfr1141	2810410L24Rik
Or5w8	Dcp2
Or5w15	Mfap3l
Or5w20	Nrros
Or5d37	Hdgfl2
Or5w16	Cop1
Or5d16	Rusc2
Or5d36	Gca
Or9m2	Heatr6
Or5i1	Pcyt1b
Or9m1	Api5
Or5d20-ps1	Slc25a42
Or9m1b	2310003N18Rik
Or5d38	Srd5a3
Or5w11	Olfr1044
Or5w13	Cep128
Or5w12	Nudt3
Or4c103	Adcyap1r1
Or5d46	Phf11d
Or4c102	Sh2d5
Or4p8	Gpr158
Or4a72	Ppm1f
Or4c123	Sertad2
Or4a39	Camsap1
Or4a75	Gm15270
Or4a73	Mefv
Or4b12	Grap2
Or4c52	Tmem132d
Or4a68	Rnf32
Or5l13	Gm13103
Or4c113	Mpzl1
Or4p22	Slc52a3
Or8w1	Mrpl15
Or10ag60	Wac
Or5d35	Adipor2
Or5l14	Ercc4
Or4c120	Ndufs4
Or4c118	Abcg1
Or4c111	Rassf3
Or4c11	Rabgap1l
Or4c11b	Grm7
Or4c11c	Cyfip1
Or4c109	Chrnb1
Or4c108	Cdc20
Or4c114	Dlgap4
Or4c115	Mir192
Or4c112	Terf2ip
Or4c116	Arhgef10
Or4p18	Tns1
Or4p19	Mrps14
Or4c101	Sptbn1
Or4a77	Kcnq1
Or4a74	Ifnar1
Or4c121	4930563F08Rik
Or4a70	Tex50
Or4a71	4933438B17Rik
Or4a2	Gata2
Or4c122	Cyp4a31
Or4c125	Slc46a1
Or4a15	Tmem125
Or4c127	Enoph1
Or4b1c	Tafa5
Or4c12b	Hipk1
Or4c10	Gm41341
Or4b1b	Cpxcr1
Or4c35	Slc6a8
Or4c10b	9230020A06Rik
Or4a47	Casq1
[truncated: 5,979 more rows]

## Sheet: Fig.1b
Figure 1b： KEGG pathway analyses of genes upregulated in Lmna-/- mESCs. Log2 fold change ≥ 0.58; p-adjust value <0.05
Category	Term	Count	%	PValue	Genes	List Total	Pop Hits	Pop Total	Fold Enrichment	Bonferroni	Benjamini	FDR
KEGG_PATHWAY	mmu01100:Metabolic pathways	112	10.9268	3.31678e-07	GALNT12, DGKE, EHMT2, SAT1, TM7SF2, PNP, ANPEP, PIP4K2A, CAR9, NUDT16, GGT1, PDE8A, PSPH, NUDT12, ALG9, OXSM, ACSL6, SDHC, ACYP1, COX6B2, DGKZ, DPM1, PHOSPHO1, DPM3, SUCLG2, PLPP2, PDE9A, PTGES, DGKH, SHMT2, PNP2, NDUFB11, GSTT3, MTM1, ACAT1, CYP11A1, PMVK, ST3GAL4, B4GALNT1, ATP6V0A4, B4GALNT2, PCK2, B4GALNT4, B3GALNT2, B3GALNT1, TGDS, ASNS, LACC1, HAL, CYP2S1, CYCT, KYAT3, QPRT, PIGP, COX4I2, P…	413	1650	9565	1.57206	0.000106463	0.000106469	0.000104479
KEGG_PATHWAY	mmu05412:Arrhythmogenic right ventricular cardiomyopathy	14	1.36585	7.19593e-05	ITGB4, LAMA1, ITGA3, ITGB3, ATP2A3, CACNA2D2, CACNB1, DES, ITGA10, ITGB7, DSG2, ITGA6, ITGA9, CACNG5	413	86	9565	3.7702	0.022835	0.00968921	0.0095081
KEGG_PATHWAY	mmu05410:Hypertrophic cardiomyopathy	15	1.46341	9.05534e-05	ACE, ITGB4, LAMA1, ITGA3, TPM3, ITGB3, ATP2A3, CACNA2D2, CACNB1, DES, ITGA10, ITGB7, ITGA6, ITGA9, CACNG5	413	100	9565	3.47397	0.0286505	0.00968921	0.0095081
KEGG_PATHWAY	mmu05414:Dilated cardiomyopathy	15	1.46341	0.000125365	ITGB4, LAMA1, ITGA3, TPM3, ITGB3, ATP2A3, CACNA2D2, ADRB1, CACNB1, DES, ITGA10, ITGB7, ITGA6, ITGA9, CACNG5	413	103	9565	3.37279	0.0394455	0.0100605	0.00987246
KEGG_PATHWAY	mmu04151:PI3K-Akt signaling pathway	32	3.12195	0.000247454	ITGB4, LAMA1, ITGB3, FOXO3, FGF3, FGF4, CCND3, GNGT2, MYC, ITGB7, PCK2, PDGFRB, NGFR, NOS3, ITGA3, VEGFC, PPP2R5A, NFKB1, VEGFA, TCL1, COL4A2, LPAR5, COL4A1, ITGA10, ITGA6, COL6A6, FGFR4, EIF4E2, FGFR3, EPHA2, FGF10, ITGA9	413	367	9565	2.01938	0.0763689	0.0158865	0.0155896
KEGG_PATHWAY	mmu04510:Focal adhesion	21	2.04878	0.000436474	PDGFRB, ITGB4, LAMA1, ITGA3, ITGB3, EMP1, VEGFC, EMP2, PARVB, VEGFA, MYLPF, CCND3, MYL7, COL4A2, COL4A1, ITGA10, PAK6, COL6A6, ITGB7, ITGA6, ITGA9	413	202	9565	2.4077	0.130762	0.0233513	0.0229149
KEGG_PATHWAY	mmu04810:Regulation of actin cytoskeleton	22	2.14634	0.00115233	PDGFRB, ITGB4, ITGA3, ITGB3, BAIAP2, FGF3, FGF4, MYLPF, DIAPH3, RGCC, MYL7, MRAS, LPAR5, ITGA10, PAK6, PIP4K2A, ITGB7, ITGA6, FGFR4, FGFR3, ITGA9, FGF10	413	234	9565	2.17742	0.309343	0.0528426	0.0518549
KEGG_PATHWAY	mmu04512:ECM-receptor interaction	12	1.17073	0.00146487	COL4A2, ITGA3, ITGB4, SV2A, LAMA1, COL4A1, ITGB3, ITGA10, COL6A6, ITGA6, ITGB7, ITGA9	413	89	9565	3.12267	0.375352	0.0587778	0.0576791
KEGG_PATHWAY	mmu04820:Cytoskeleton in muscle cells	21	2.04878	0.00242028	ITGB4, LAMA1, ITGA3, TPM3, ITGB3, ANKRD23, ATP1B1, MYL4, MYLPF, DES, DIAPH3, MYL7, COL4A2, COL4A1, COL5A3, ITGA10, COL6A6, ITGB7, DSG2, ITGA6, ITGA9	413	232	9565	2.09636	0.540608	0.0863232	0.0847097
KEGG_PATHWAY	mmu00561:Glycerolipid metabolism	9	0.878049	0.00537016	DGKE, ALDH2, GPAT2, LPIN1, PLPP2, DGKZ, AGPAT2, AKR1B8, DGKH	413	63	9565	3.30854	0.822443	0.172382	0.16916
KEGG_PATHWAY	mmu05200:Pathways in cancer	37	3.60976	0.00719253	GSTP3, LAMA1, EPAS1, CAMK2A, GSTT3, FGF3, FGF4, WNT6, FRAT1, CCND3, WNT11, GNGT2, MYC, E2F2, PMAIP1, STAT6, IL12RB2, PDGFRB, STAT5A, WNT10A, FZD5, DAPK1, ITGA3, TPM3, VEGFC, NFKB1, VEGFA, BMP4, PAX8, COL4A2, LPAR5, COL4A1, CYCT, ITGA6, FGFR4, FGFR3, FGF10	413	548	9565	1.56371	0.901446	0.209891	0.205968
KEGG_PATHWAY	mmu04020:Calcium signaling pathway	20	1.95122	0.01411	PDGFRB, CAMK1D, NOS3, NTRK3, CAMK2A, ATP2A3, VEGFC, ADRB1, ATP2B2, FGF3, VEGFA, FGF4, P2RX5, PPP3CC, P2RX2, ITPKA, FGFR4, PLCD3, FGFR3, FGF10	413	255	9565	1.81646	0.989554	0.349326	0.342797
KEGG_PATHWAY	mmu04260:Cardiac muscle contraction	10	0.97561	0.0141472	COX8A, CACNB1, MYL4, TPM3, COX4I2, ATP2A3, CACNA2D2, COX6B2, ATP1B1, CACNG5	413	89	9565	2.60223	0.98968	0.349326	0.342797
KEGG_PATHWAY	mmu04974:Protein digestion and absorption	11	1.07317	0.0177851	COL15A1, SLC15A1, COL13A1, COL4A2, COL4A1, COL5A3, SLC1A1, COL20A1, COL6A6, SLC1A5, ATP1B1	413	108	9565	2.35887	0.99685	0.401237	0.393737
KEGG_PATHWAY	mmu04010:MAPK signaling pathway	22	2.14634	0.0187494	PDGFRB, NGFR, TRADD, PLA2G4C, VEGFC, CACNA2D2, HSPB1, NFKB1, FGF3, VEGFA, FGF4, CACNB1, PPP3CC, MRAS, MKNK1, MYC, MAPT, FGFR4, FGFR3, EPHA2, CACNG5, FGF10	413	299	9565	1.70407	0.997702	0.401237	0.393737
KEGG_PATHWAY	mmu00564:Glycerophospholipid metabolism	10	0.97561	0.0297326	PHOSPHO1, DGKE, PLA2G4C, PLAAT3, GPAT2, LPIN1, PLPP2, DGKZ, AGPAT2, DGKH	413	101	9565	2.29305	0.999938	0.572266	0.56157
KEGG_PATHWAY	mmu05219:Bladder cancer	6	0.585366	0.0303069	DAPK1, MYC, E2F2, FGFR3, HBEGF, VEGFA	413	41	9565	3.38924	0.999949	0.572266	0.56157
KEGG_PATHWAY	mmu01200:Carbon metabolism	11	1.07317	0.0374596	PCCA, SHMT2, HKDC1, SUCLG2, SDHC, ACADS, HIBCH, PFKP, PSPH, FBP2, ACAT1	413	122	9565	2.08818	0.999995	0.627123	0.615401
KEGG_PATHWAY	mmu04310:Wnt signaling pathway	14	1.36585	0.0389752	WNT10A, FZD5, CAMK2A, CSNK1E, WNT6, FRAT1, SFRP1, PORCN, CCND3, WNT11, PPP3CC, SOX17, MYC, SFRP5	413	175	9565	1.85278	0.999997	0.627123	0.615401
KEGG_PATHWAY	mmu04550:Signaling pathways regulating pluripotency of stem cells	12	1.17073	0.0390731	BMP4, WNT6, WNT10A, WNT11, FZD5, MYC, INHBB, KLF4, FGFR4, FGFR3, POU5F1, TBX3	413	140	9565	1.98513	0.999997	0.627123	0.615401
KEGG_PATHWAY	mmu04931:Insulin resistance	10	0.97561	0.0473954	TBC1D4, PPP1R3B, NOS3, PRKCE, PPP1R3D, PYGM, PYGL, NFKB1, PPARGC1B, PCK2	413	110	9565	2.10544	1	0.687253	0.674407
KEGG_PATHWAY	mmu04014:Ras signaling pathway	17	1.65854	0.0485272	PDGFRB, NGFR, PLA2G4C, VEGFC, PLAAT3, NFKB1, FGF3, VEGFA, FGF4, ZAP70, GNGT2, MRAS, PAK6, FGFR4, FGFR3, EPHA2, FGF10	413	236	9565	1.66829	1	0.687253	0.674407
KEGG_PATHWAY	mmu05222:Small cell lung cancer	9	0.878049	0.0492424	COL4A2, ITGA3, LAMA1, COL4A1, MYC, CYCT, E2F2, ITGA6, NFKB1	413	94	9565	2.21743	1	0.687253	0.674407
KEGG_PATHWAY	mmu01230:Biosynthesis of amino acids	8	0.780488	0.0532135	SHMT2, CBS, CTH, ASNS, PFKP, PSPH, ASS1, BCAT2	413	79	9565	2.3453	1	0.700303	0.687213
KEGG_PATHWAY	mmu04070:Phosphatidylinositol signaling system	9	0.878049	0.0545407	DGKE, ITPKA, ITPK1, PIP4K2A, PLCD3, DGKZ, PIK3C2B, MTM1, DGKH	413	96	9565	2.17123	1	0.700303	0.687213
KEGG_PATHWAY	mmu05165:Human papillomavirus infection	23	2.2439	0.0606051	PDGFRB, WNT10A, FZD5, ITGB4, LAMA1, ITGA3, ITGB3, TRADD, PPP2R5A, NFKB1, VEGFA, WNT6, CCND3, WNT11, COL4A2, COL4A1, ITGA10, COL6A6, ITGB7, ATP6V0A4, ITGA6, OASL1, ITGA9	413	359	9565	1.48378	1	0.741851	0.727985
KEGG_PATHWAY	mmu03266:Virion - Herpesvirus	3	0.292683	0.0662489	ITGB3, PILRA, NECTIN1	413	10	9565	6.94794	1	0.741851	0.727985
KEGG_PATHWAY	mmu00051:Fructose and mannose metabolism	5	0.487805	0.0675565	HKDC1, GMPPA, PFKP, FBP2, AKR1B8	413	36	9565	3.21664	1	0.741851	0.727985
KEGG_PATHWAY	mmu05207:Chemical carcinogenesis - receptor activation	16	1.56098	0.0677206	STAT5A, CHRNB4, PAQR7, GSTT3, CHRNA9, ADRB1, KLF4, NFKB1, FGF3, VEGFA, FGF4, CCND3, KLF5, BCL6, MYC, FGF10	413	228	9565	1.62525	1	0.741851	0.727985
KEGG_PATHWAY	mmu04933:AGE-RAGE signaling pathway in diabetic complications	9	0.878049	0.0693319	STAT5A, COL4A2, COL4A1, NOS3, PRKCE, VEGFC, PLCD3, NFKB1, VEGFA	413	101	9565	2.06375	1	0.741851	0.727985
KEGG_PATHWAY	mmu04261:Adrenergic signaling in cardiomyocytes	12	1.17073	0.0736488	CACNB1, MYL4, TPM3, CAMK2A, ATP2A3, PPP2R5A, CACNA2D2, ADRB1, ATP2B2, ATP1B1, RAPGEF3, CACNG5	413	156	9565	1.78152	1	0.762089	0.747844
KEGG_PATHWAY	mmu05230:Central carbon metabolism in cancer	7	0.682927	0.0759715	PDGFRB, HKDC1, NTRK3, MYC, SLC1A5, FGFR3, PFKP	413	69	9565	2.34955	1	0.762089	0.747844
KEGG_PATHWAY	mmu04814:Motor proteins	14	1.36585	0.0857825	DNAH8, TPM3, MYL6B, KIF23, KIF17, MYL4, MYLPF, KIF19A, MYL7, MYO1A, KIFC3, DYNC1I1, MYO1F, MYO1G	413	198	9565	1.63756	1	0.811864	0.796689
KEGG_PATHWAY	mmu00270:Cysteine and methionine metabolism	6	0.585366	0.0869991	LACC1, TST, CBS, CTH, KYAT3, BCAT2	413	55	9565	2.52652	1	0.811864	0.796689
KEGG_PATHWAY	mmu00562:Inositol phosphate metabolism	7	0.682927	0.0891742	FIG4, ITPKA, ITPK1, PIP4K2A, PLCD3, PIK3C2B, MTM1	413	72	9565	2.25165	1	0.811864	0.796689
KEGG_PATHWAY	mmu04360:Axon guidance	13	1.26829	0.0910502	SEMA5B, SEMA6C, SEMA4A, SEMA7A, UNC5A, CAMK2A, SEMA4G, ABLIM2, PPP3CC, RGS3, BOC, PAK6, EPHA2	413	181	9565	1.66341	1	0.811864	0.796689
KEGG_PATHWAY	mmu00280:Valine, leucine and isoleucine degradation	6	0.585366	0.0978441	PCCA, ALDH2, ACADS, HIBCH, BCAT2, ACAT1	413	57	9565	2.43787	1	0.848864	0.832997

## Sheet: Fig.1c
Figure 1c: Metabolites detected by LC-MS/MS based untargeted metabolomics in ESC
Metabolites	ES WT	ES WT	ES WT	ES WT	ES WT	ES WT	ES KO	ES KO	ES KO	ES KO	ES KO	ES KO
Glucose	53.4242	64.6933	65.4565	301.351	574.953	431.736	73.4842	98.8777	124.763	131.039	412.589	406.846
Fructose	51.0642	57.6354	80.1356	113.164	165.955	156.671	66.3157	58.9344	181.279	99.7722	172.448	204.465
Glucose_6P	55.6454	66.0658	83.5931	115.018	179.732	138.312	72.773	68.176	167.332	107.539	150.737	204.765
D_gluconic_acid	24.5687	34.6866	28.6066	31.0894	45.9206	37.6592	19.0769	27.2403	11.6241	18.6023	21.2507	17.7313
Gluconic acid_6P	295.185	414.623	806.163	665.314	482.663	727.768	272.879	558.276	267.549	381.933	541.975	649.773
Galactose_6P	133.778	173.693	305.688	244.466	156.602	253.51	129.082	258.662	169.347	126.291	222.646	259.663
Ribose_5P	444.473	615.164	1168.81	762.223	547.55	745.509	476.33	1028.56	531.268	414.969	494.701	502.119
Ribulose_5P	580.005	888.292	1637.29	1081.73	850.762	1139.86	678.758	1354.1	751.87	610.908	743.117	782.552
Sedoheptulose_7P	42.3418	56.6396	111.765	62.6474	48.242	76.4574	81.2252	108.786	68.3741	51.8887	49.2217	62.8871
Erythrose_4P	0	0	0	0	0	0	0	0	0	0	0	0
Fructose_6P	122.235	151.489	292.928	208.821	158.092	286.395	134.394	260.55	166.562	131.048	230.67	285.416
Aldopedose	0	0	0	57799	85023.3	76791.3	0	0	0	5817.87	10340.3	6044.55
Pyruvate	45.485	47.3575	45.7714	64.7634	97.9126	34.6496	94.9437	109.644	95.0418	88.0851	78.5548	98.54
Lactate	67.0345	69.2453	70.2779	105.348	129.568	85.3895	132.4	125.962	151.768	96.3967	117.164	79.6398
Fumarate	6.41903	7.87433	7.31575	9.08506	11.3771	7.18788	16.411	13.7476	21.3274	11.5784	9.37319	9.14621
Succinate	8.78188	8.6027	7.74695	16.1996	28.4154	24.2625	8.79298	14.2051	15.261	13.4098	24.9135	22.0038
Aspartate	102.477	126.125	109.744	120.056	175.82	126.97	145.577	136.702	230.056	140.234	146.023	99.9578
Malate	114.336	160.221	141.1	233.588	321.372	187.924	214.384	198.389	732.889	240.8	266.961	191.359
aKetogluterate	9.66241	12.0353	13.0139	19.6662	25.6259	13.8206	16.045	14.1392	29.2925	24.1428	14.8557	18.0092
Citrate	37.437	46.7207	43.8591	23.8235	54.4876	34.0113	47.7974	35.7171	47.2943	18.6311	28.8495	12.2658
Isocitrate	1.46764	1.88689	1.87267	1.16468	1.96302	1.4045	1.04911	1.1044	1.14595	0.673454	0.988787	0.663524
2HG	0.466609	0.490947	0.405279	0.58492	0.976766	0.733409	0.601963	0.57612	0.706805	0.650794	0.71634	0.546344
methylcitrate	0.017839	0.0776167	0.0577612	0.0251883	0.0386464	0.0193784	0.0226728	0.0126318	0.0335436	0.0282405	0.018	0.00932998
cis_aconiti_ acid	3.73606	4.80531	5.71317	3.66824	5.23867	0	5.24484	4.15337	5.00611	2.36485	5.83316	0
Itaconate	17.5061	20.0015	17.9114	39.0985	56.7069	38.45	23.3655	24.0358	25.6146	24.9659	40.5434	28.54
methyl_malonic_acid	3.69904	2.41944	2.28805	1.74522	2.00483	1.25239	7.48867	3.28019	3.89023	2.2487	4.56	5.34
trans_aconitic_acid	14.3623	15.3739	16.847	9.36179	16.8543	10.4473	14.7024	11.7615	17.506	6.04799	8.68432	4.21167
Glutamine	2214.53	1370.14	2100.96	1969.44	1180.36	1683.85	1283.42	2134.61	1163.51	1807.34	1639.67	1983.72
Glutamate	12336.9	8305.28	13857.8	10481.5	6717.89	8123.7	6081.27	10846.5	6019.46	9048.56	6134.59	6545.05
Proline	1845.27	917.898	1575.12	1227.11	785.602	1033.75	846.35	1316.3	759.169	1049.24	900.787	1091.06
GPR	3.3759	0.351444	0.520501	0.62337	0.288697	0.439277	0.309752	0.406017	0.247475	0.360775	0.373617	0.494277
Serine	2807.93	1482.67	2151.04	1738.69	1088.98	1399.76	1179.31	1730.08	957.869	1689.87	1359.07	1528.94
Glycine	1787.76	905.272	1373.03	1137.56	686.962	850.356	1051.36	1510.26	817.514	1588.4	1126.05	1288.46
Methionine	501.466	285.68	497.2	373.772	261.228	339.982	218.199	400.434	210.502	291.454	311.261	375.612
Cysteine	2.05351	7.67027	6.53795	6.4204	6.67624	7.66603	736.436	1233.71	762.499	849.013	830.238	998.614
Cystathionine	115.742	116.094	247.599	168.675	123.176	163.057	812.489	1576	1783.18	1353.75	1495.01	1830.11
Cystine	25.1155	33.001	56.1208	47.4628	35.8453	38.6087	152.007	134.786	137.053	147.071	165.087	158.859
Homocysteine	55.9387	142.73	184.313	174.798	133.716	176.296	176.491	305.394	165.847	229.171	486.828	499.178
Arginine	830.955	164.818	285.416	257.345	151.394	195.463	183.86	297.117	190.878	171.333	155.953	184.402
Citrulline	4.60467	0.522942	0.888086	0.753063	1.38413	0.948345	0.934758	1.55865	1.05896	2.21096	1.9017	2.94521
Ornithine	7.23189	11.5444	19.1221	17.2957	13.5031	18.5442	8.87499	17.3745	12.0245	12.1725	14.5916	16.3504
Asparagine	1437.88	570.726	860.354	617.22	376.773	499.323	482.347	633.154	346.958	472.174	414.644	493.843
Hypoxanthine	382.041	86.5326	130.619	104.462	57.8058	73.4204	76.8371	116.865	65.5463	120.068	78.3417	92.9315
Threonine	1895.12	735.479	933.546	813.746	454.478	585.656	574.099	859.801	509.228	766.296	613.301	645.107
1MHIS	3.99428	1.70444	2.32126	2.0497	1.36122	1.78279	1.3688	2.59352	1.52336	1.65241	1.68323	2.0288
PHP	2.24657	1.30796	1.94639	1.75267	1.26118	1.74125	1.91848	2.77357	1.64917	2.40253	2.43451	3.00341
Alanine	3819.82	2436.35	4359.01	3108.14	2064	2844.13	2071.24	3422.21	2022.83	2898.54	2463.07	2898.03
GABA	396.154	53.6949	87.8609	84.0577	61.4667	66.253	139.586	170.291	107.389	135.411	60.8944	65.4326
Lysine	1455.44	366.295	689.77	602.835	364.801	471.576	364.221	658.488	467.441	336.85	336.715	391.722
Aspartate	3798.98	2378.51	4097.5	2336.16	1221.82	1495.33	2082.35	3321.27	1973.31	2425.91	1644.03	1759.68
Histidine	461.063	88.4987	140.584	113.502	54.8679	76.5966	93.7032	138.537	88.7801	75.3181	59.1355	69.8632
TPR	21.3169	11.2265	18.0667	14.6803	10.4391	12.1652	16.6654	24.7258	12.9006	18.5215	12.3636	14.9891
Valine	3671.89	1031.47	1701.48	1390.33	944.984	1488.22	1030.48	1529.92	1100.45	1306.91	1227.74	1458.07
Tryptophane	172.251	35.8716	61.7431	46.668	26.1314	36.3478	40.0865	61.0182	35.8358	36.1434	32.7587	37.2524
aminoadipicacid	3.93629	2.62489	4.47344	1.99858	1.26079	1.65465	1.14083	2.21138	1.30322	1.77401	1.40997	1.3497
Leucine	1110.03	855.928	1525.85	1206.05	873.576	1154.06	622.022	1177.13	613.015	975.998	1059.34	1283.92
Phenylalanine	592.699	227.45	371.366	262.116	162.827	208.704	222.145	360.863	211.994	202.515	193.592	219.819
aminopimelicacid	0.584827	0.183974	0.278976	0	0	0	0	0.236521	0	0	0	0
Sarcosine	4714.36	2591.29	4480.13	3043.44	2017.69	2718.26	2203.69	3510.53	2110.49	2801.01	2365.25	2786.49
Isoleucine	1284.53	1235.87	2223.18	1786.06	1297.3	1714.5	853.035	1660.66	825.692	1422.16	1575.76	1923.84

## Sheet: Fig.1d
Figure 1d: Intracellular levels of metabolites in control and Lmna-/- mESCs determined by LC-MS or by fluorometric assay (acetyl-CoA)
Metabolites	Lmna+/+ mESC	Lmna+/+ mESC	Lmna+/+ mESC	Lmna+/+ mESC	Lmna+/+ mESC	Lmna+/+ mESC	Lmna-/- mESC	Lmna-/- mESC	Lmna-/- mESC	Lmna-/- mESC	Lmna-/- mESC	Lmna-/- mESC
Methionine	501.466	285.68	497.2	373.772	261.228	339.982	218.199	400.434	210.502	291.454	311.261	375.612
Homocysteine	55.9387	142.73	184.313	174.798	133.716	176.296	176.491	305.394	165.847	229.171	486.828	499.178
Cystathionine	115.742	116.094	247.599	168.675	123.176	163.057	812.489	1576	1783.18	1353.75	1495.01	1830.11
Cysteine	2.05351	7.67027	6.53795	6.4204	6.67624	7.66603	736.436	1233.71	762.499	849.013	830.238	998.614
Cystine	25.1155	33.001	56.1208	47.4628	35.8453	38.6087	152.007	134.786	137.053	147.071	165.087	158.859
Pyruvate	45.485	47.3575	45.7714	64.7634	97.9126	34.6496	94.9437	109.644	95.0418	88.0851	78.5548	98.54
Acetyl-CoA	4.23503	3.27778	3.72564	6.7541	7.1245	2.1452	9.45637	9.25332	9.60485	12.0123	8.7412	13.5632

## Sheet: Fig.1f
Figure 1f: Lamin A/C enrichment in Lmna+/+ and Lmna-/- mESCs (% of input)
	Lmna+/+			Lmna-/-
Cbs	0.4265	0.2606	0.4809	0.038	0.0186	0.0327
Cth	0.80003	0.94589	0.87317	0.07142	0.0222	0.03353

## Sheet: Fig.1h
Figure 1g： TOBIAS motif analysis showing SP1 is the most enriched transcription factor (TF) in the accessible chromatin regions within ±5 kb of the Cbs and Cth transcription start sites in Lmna-/- cells
	log10Pvalue	MotifScore
Sp1	3	10.6955
Sp5	3	10.5803
Sp5	3	9.19673
KLF1	3	9.03078
KLF5	3	8.09733
Sp5	3	8.0133
KLF6	3	6.34796
KLF3	2	10.6585
Sp2	2	8.13689
PR	2	6.03512
Erra	1	6.43085
WT1	0	10.9358
WT1	0	10.8681
Zic3	0	9.642
GLIS3	0	7.90406
GLIS3	0	7.16519
BORIS	4	9.13722
Sp1	3	10.3288
Sp5	3	10.1645
KLF1	3	9.34038
KLF6	3	8.87557
KLF1	3	8.32181
KLF5	3	8.06471
KLF5	3	8.06348
KLF5	3	7.69955
KLF5	3	7.68819
Sp2	2	10.3038
Sp2	2	9.8001
Stat3	2	7.15779
Sox6	2	6.38676
SCL	2	6.09948
Pitx1	2	5.78079
SCL	2	5.69564
SCL	2	5.22597
Pitx1	2	4.95891
Pitx1	2	4.72834
OCT4SOX2TCFNANOG	1	9.23864
OCT4SOX2TCFNANOG	1	8.79759
Erra	1	8.61472
Sox2	1	8.17496
Erra	1	8.03768
COUPTFII	1	7.87248
Erra	1	7.74923
Elk1	1	7.55993
Elk4	1	7.47865
COUPTFII	1	7.05786
ETV4	1	7.01569
COUPTFII	1	6.74548
ETV4	1	6.68947
Fli1	1	6.33475
Erra	1	6.23205
Fli1	1	6.09476
ERG	0	8.551
EWS	0	8.32715
GLIS3	0	8.12601
ETS1	0	7.78621
Etv2	0	7.75641
Zic	0	7.61333
ETV1	0	7.58355

## Sheet: Fig.1i
Fgiure 1i： ChIP-qPCR analysis of SP1 enrichment at Cth and Cbs gene promoter region in control and Lmna-/- mESCs; GD, gene desert region, used as a negative control
	WT				Lmna-/-
Cth promoter	1.64131	0.862592	4.74042	5.79828	15.2768	12.4748	21.9948	22.3494
Cbs promoter	1.47	1.73	1.21	1.98	3.89	5.51	4.47	6.49
Negative	0.064762	0.148751	0.02	0.01	0.080247	0.081964	0.712276	0.966611

## Sheet: Fig.1j
Fgiure 1j： qPCR analysis of Cth and Cbs mRNA level in control and Lmna-/- mESCs after Sp1 knockdown by siRNA
	siCtrl control				siCtrl Lmna-/-				siSp1 Control				siSp1 Lmna-/-
Cbs	1.03042	0.970476	1.06	0.95	3.33613	3.72519	3.06	3.83	0.612764	0.2	0.25	0.3	1.2068	1.91011	1.49	0.74
Cth	0.990654	1.00943	1.01	0.99	3.24	2.98	3.91	4.12	0.378415	0.425841	0.3	0.27	1.1319	1.18609	1.01	1.58

## Sheet: Fig.1l
Figure 1l： KEGG pathway analyses of genes down-regulated in Lmna G609G/+ and Lmna G609G/G609G mESCs. Log2 fold change ≤- 0.58; p-adjusted value <0.05
KEGG_PATHWAY for down-regulated gene in Lmna G609G/G609G														KEGG_PATHWAY for down-regulated gene in Lmna G609G/+
Category	Term		Count	%	PValue	Genes	List Total	Pop Hits	Pop Total	Fold Enrichment	Bonferroni	Benjamini	FDR	Category	Term		Count	%	PValue	Genes	List Total	Pop Hits	Pop Total	Fold Enrichment	Bonferroni	Benjamini	FDR
KEGG_PATHWAY	mmu04260	Cardiac muscle contraction	17	2.01183	1.59e-08	COX8A, ATP2A3, ATP1A4, CACNA2D2, UQCR11, ATP1B2, COX6C, ATP1B1, COX6A1, COX7A1, CACNB1, MYL4, CACNG6, CACNG7, CACNG8, FXYD2, CASQ2	305	89	9565	5.99024	4.9e-06	4.9e-06	4.15e-06	KEGG_PATHWAY	mmu04020	Calcium signaling pathway	22	2.62843	0.00010556	CAMK2B, PDGFRA, FLT4, CAMK2A, ATP2A3, TFEB, PDGFB, ADRB1, ITPR3, PRKCA, CALML4, GRIN2C, GRIN1, P2RX4, PPP3CC, P2RX2, ADORA2B, ITPKA, SLC25A31, FGFR4, PLCD1, FGF10	317	255	9565	2.6032	0.0320934	0.024879	0.0217389
KEGG_PATHWAY	mmu04261	Adrenergic signaling in cardiomyocytes	17	2.01183	3.48e-05	CAMK2A, ATP2A3, ATP1A4, CACNA2D2, ADRB1, PRKCA, CALML4, ATP1B2, ATP1B1, MAPK13, CACNB1, MYL4, CACNG6, CACNG7, CACNG8, FXYD2, RAPGEF3	305	156	9565	3.41751	0.0106903	0.00537381	0.00455644	KEGG_PATHWAY	mmu04550	Signaling pathways regulating pluripotency of stem cells	15	1.79211	0.000210905	WNT7B, ESX1, ESRRB, PIK3CD, INHBB, LIFR, KLF4, DUSP9, TBX3, BMP4, MYC, HAND1, NANOG, FGFR4, LEFTY2	317	140	9565	3.23288	0.0630979	0.024879	0.0217389
KEGG_PATHWAY	mmu04550	Signaling pathways regulating pluripotency of stem cells	15	1.77515	0.000141	LEFTY1, WNT7B, ESRRB, PIK3CD, INHBB, KLF4, DUSP9, TBX3, MAPK13, BMP4, MYC, HAND1, NANOG, FGFR4, LEFTY2	305	140	9565	3.36007	0.0425839	0.0131052	0.0111119	KEGG_PATHWAY	mmu04820	Cytoskeleton in muscle cells	20	2.38949	0.000241544	TRIM63, ITGB4, LAMA1, FHL1, ATP1A4, AMPD3, ATP1B2, NID1, ATP1B1, SGCZ, MYPN, MYOM2, SYNE1, MYLPF, FMNL1, SGCD, COL6A4, DSG2, COL9A2, ITGA9	317	232	9565	2.60116	0.071928	0.024879	0.0217389
KEGG_PATHWAY	mmu04932	Non-alcoholic fatty liver disease	16	1.89349	0.000195	COX8A, XBP1, NDUFA3, PIK3CD, UQCR11, FOS, COX6C, COX6A1, COX7A1, NFKB1, MAPK13, MLXIPL, SOCS3, CYCT, CYCS, BID	305	162	9565	3.09735	0.0583405	0.0131052	0.0111119	KEGG_PATHWAY	mmu04010	MAPK signaling pathway	23	2.74791	0.000366034	PDGFRA, NGFR, PLA2G4E, FLT4, PDGFB, CACNA2D2, PRKCA, FOS, DUSP9, NFKB1, CACNB1, CACNG6, CACNG7, EFNA3, PPP3CC, MRAS, MYC, KIT, MAPT, MAP3K6, FGFR4, EPHA2, FGF10	317	299	9565	2.32104	0.106961	0.0282761	0.0247073
KEGG_PATHWAY	mmu04010	MAPK signaling pathway	23	2.72189	0.000212	PLA2G4F, PLA2G4E, PDGFB, CACNA2D2, HSPB1, PRKCA, FOS, DUSP9, NFKB1, MAPK13, CACNB1, CACNG6, CACNG7, EFNA3, CACNG8, MRAS, ERBB3, MYC, KIT, MAPT, MAP3K6, FGFR4, EPHA2	305	299	9565	2.41236	0.063432	0.0131052	0.0111119	KEGG_PATHWAY	mmu05412	Arrhythmogenic right ventricular cardiomyopathy	11	1.31422	0.000513318	CACNB1, CACNG6, CACNG7, SGCD, ITGB4, LAMA1, ATP2A3, CACNA2D2, DSG2, SGCZ, ITGA9	317	86	9565	3.8594	0.14671	0.0317231	0.0277192
KEGG_PATHWAY	mmu05162	Measles	14	1.6568	0.000701	STAT5A, PIK3CD, FOS, CD3E, NFKB1, NFKBIA, CCND3, CCND2, OAS2, CYCT, CYCS, FCGR2B, BID, TLR2	305	145	9565	3.02793	0.194765	0.0345104	0.0292613	KEGG_PATHWAY	mmu04015	Rap1 signaling pathway	18	2.15054	0.000721491	PDGFRA, NGFR, FLT4, PDGFB, PIK3CD, PRKCA, CALML4, RAP1GAP, GRIN1, EFNA3, MRAS, ADORA2B, KIT, FGFR4, RAPGEF3, LAT, EPHA2, FGF10	317	214	9565	2.53796	0.199902	0.0358687	0.0313416
KEGG_PATHWAY	mmu05132	Salmonella infection	19	2.24852	0.00111	ARPC1B, BRK1, PIK3CD, NOD1, NLRC4, FOS, TUBA3B, TUBA3A, NFKB1, MAPK13, PYCARD, MYLPF, NFKBIA, TUBB2A, MYC, CYCT, CYCS, S100A10, TLR2	305	252	9565	2.36449	0.289658	0.0345104	0.0292613	KEGG_PATHWAY	mmu04014	Ras signaling pathway	19	2.27001	0.000812561	PDGFRA, NGFR, PLA2G1B, PLA2G4E, FLT4, PDGFB, PIK3CD, PLAAT3, PRKCA, CALML4, NFKB1, GRIN1, EFNA3, MRAS, KIT, FGFR4, LAT, EPHA2, FGF10	317	236	9565	2.42922	0.22212	0.0358687	0.0313416
KEGG_PATHWAY	mmu04960	Aldosterone-regulated sodium reabsorption	7	0.828402	0.00115	FXYD2, ATP1A4, PIK3CD, SFN, PRKCA, ATP1B2, ATP1B1	305	38	9565	5.77696	0.298757	0.0345104	0.0292613	KEGG_PATHWAY	mmu04360	Axon guidance	16	1.91159	0.000954092	CAMK2B, SEMA6C, EPHA4, SEMA4A, SEMA7A, CAMK2A, PIK3CD, PRKCA, SEMA4G, NTN1, EFNA3, ABLIM1, EFNB3, PPP3CC, PLXNC1, EPHA2	317	181	9565	2.66727	0.255435	0.0368518	0.0322006
KEGG_PATHWAY	mmu04820	Cytoskeleton in muscle cells	18	2.13018	0.00115	ITGB4, ITGA1, FHL1, ATP1A4, AMPD3, ATP1B2, NID1, ATP1B1, SGCZ, MYPN, MYOM2, MYL4, MYLPF, FMNL1, CSRP2, LMNA, COL6A4, COL9A2	305	232	9565	2.43315	0.299856	0.0345104	0.0292613	KEGG_PATHWAY	mmu05231	Choline metabolism in cancer	11	1.31422	0.001433	PDGFRA, DGKE, SLC44A2, PLA2G4E, PDGFB, PIK3CD, PRKCA, FOS, GPCPD1, PLPP3, PLPP2	317	98	9565	3.38682	0.357966	0.0430305	0.0375994
KEGG_PATHWAY	mmu05022	Pathways of neurodegeneration - multiple diseases	29	3.43195	0.0014	CAMK2A, ATP2A3, UQCR11, CALML4, TUBA3B, COX6A1, TUBA3A, COX7A1, ATP5MC1, UBA1Y, NEFL, BID, COX8A, XBP1, ATP5PD, WNT7B, NDUFA3, WIPI1, PRKCA, COX6C, GRIN2C, NFKB1, GRIN1, MAPK13, TUBB2A, CYCT, CYCS, HAP1, MAPT	305	481	9565	1.89077	0.350811	0.0345104	0.0292613	KEGG_PATHWAY	mmu04720	Long-term potentiation	9	1.07527	0.0015525	CAMK2B, PPP3CC, CAMK2A, ITPR3, PRKCA, CALML4, GRIN2C, RAPGEF3, GRIN1	317	67	9565	4.05316	0.381276	0.0430305	0.0375994
KEGG_PATHWAY	mmu01100	Metabolic pathways	74	8.7574	0.00144	DMGDH, DGKE, ST6GALNAC2, PIK3CD, COX6A1, ATP12A, IL4I1, MCEE, AUH, NAT8F2, ACP5, PGM2, GGT1, PDE8A, COX8A, VKORC1, PLA2G4F, URAH, PLA2G4E, ITPK1, PLAAT3, NME4, AMPD3, TST, BDH1, ITPKA, PLA2G10, B4GALT6, MGLL, PDE9A, FBP2, BLVRA, PTGES, TPH2, GSTP3, PLA2G1B, COX17, GSTT1, UQCR11, AK4, NPL, AGPAT2, COX7A1, AK8, PTS, PTGS1, ATP5MC1, SELENBP1, LDHB, EXTL1, CYP11A1, PPCS, CBS, CHST10, B3GALNT1, ATP5PD…	305	1650	9565	1.40648	0.35943	0.0345104	0.0292613	KEGG_PATHWAY	mmu05031	Amphetamine addiction	9	1.07527	0.00188008	CAMK2B, PPP3CC, CAMK2A, PRKCA, CALML4, FOS, GRIN2C, SIRT1, GRIN1	317	69	9565	3.93567	0.440936	0.0430305	0.0375994
KEGG_PATHWAY	mmu05417	Lipid and atherosclerosis	17	2.01183	0.0015	ABCA1, XBP1, CAMK2A, PIK3CD, PRKCA, FOS, CALML4, NFKB1, MAPK13, PYCARD, NFKBIA, CASP6, CYCT, CYCS, BID, ABCG1, TLR2	305	217	9565	2.45683	0.370769	0.0345104	0.0292613	KEGG_PATHWAY	mmu04261	Adrenergic signaling in cardiomyocytes	14	1.67264	0.00195299	CAMK2B, CAMK2A, ATP2A3, ATP1A4, CACNA2D2, ADRB1, PRKCA, CALML4, ATP1B2, ATP1B1, CACNB1, CACNG6, CACNG7, RAPGEF3	317	156	9565	2.70788	0.453414	0.0430305	0.0375994
KEGG_PATHWAY	mmu05414	Dilated cardiomyopathy	11	1.30178	0.00157	CACNB1, CACNG6, CACNG7, CACNG8, ITGB4, ITGA1, LMNA, ATP2A3, CACNA2D2, ADRB1, SGCZ	305	103	9565	3.3492	0.384335	0.0345104	0.0292613	KEGG_PATHWAY	mmu04310	Wnt signaling pathway	15	1.79211	0.0019543	CAMK2B, WNT7B, CAMK2A, PRKCA, MCC, SIRT1, VANGL1, SFRP4, PORCN, PPP3CC, SOX17, MYC, SFRP5, ROR2, NOTUM	317	175	9565	2.5863	0.453636	0.0430305	0.0375994
KEGG_PATHWAY	mmu05412	Arrhythmogenic right ventricular cardiomyopathy	10	1.18343	0.00158	CACNB1, CACNG6, CACNG7, CACNG8, ITGB4, ITGA1, LMNA, ATP2A3, CACNA2D2, SGCZ	305	86	9565	3.64659	0.386191	0.0345104	0.0292613	KEGG_PATHWAY	mmu05414	Dilated cardiomyopathy	11	1.31422	0.0020883	CACNB1, CACNG6, CACNG7, SGCD, ITGB4, LAMA1, ATP2A3, CACNA2D2, ADRB1, SGCZ, ITGA9	317	103	9565	3.22241	0.475841	0.0430305	0.0375994
KEGG_PATHWAY	mmu00270	Cysteine and methionine metabolism	8	0.946746	0.00168	LDHB, IL4I1, TST, CBS, CTH, KYAT3, CDO1, LDHAL6B	305	55	9565	4.56155	0.404343	0.0345104	0.0292613	KEGG_PATHWAY	mmu00270	Cysteine and methionine metabolism	8	0.955795	0.00208886	LDHB, LACC1, BHMT, TST, CBS, CTH, KYAT3, CDO1	317	55	9565	4.38887	0.475931	0.0430305	0.0375994
KEGG_PATHWAY	mmu05235	PD-L1 expression and PD-1 checkpoint pathway in cancer	10	1.18343	0.00186	NFKBIA, IFNGR2, PIK3CD, FOS, CD3E, NFKBIE, NFKB1, LAT, TLR2, MAPK13	305	88	9565	3.56371	0.436676	0.0348723	0.0295681	KEGG_PATHWAY	mmu04922	Glucagon signaling pathway	11	1.31422	0.00224455	CAMK2B, LDHB, CPT1A, PPP3CC, CAMK2A, ITPR3, SIK1, PYGM, CALML4, SIRT1, FBP2	317	104	9565	3.19143	0.500599	0.0433479	0.0378768
KEGG_PATHWAY	mmu05014	Amyotrophic lateral sclerosis	24	2.84024	0.00192	COX8A, XBP1, ATP5PD, NDUFA3, CHCHD10, UQCR11, WIPI1, COX6C, TUBA3B, GRIN2C, COX6A1, TUBA3A, COX7A1, ATP5MC1, MAPK13, GRIN1, NXF2, TUBB2A, CYCT, CYCS, NEFL, ANG, HAP1, BID	305	375	9565	2.00708	0.447554	0.0348723	0.0295681	KEGG_PATHWAY	mmu04024	cAMP signaling pathway	17	2.03106	0.00306686	CAMK2B, CAMK2A, ATP2A3, ATP1A4, PIK3CD, ADRB1, FOS, CALML4, ATP1B2, ATP1B1, GRIN2C, SSTR2, NFKB1, GRIN1, NFKBIA, CNGA3, RAPGEF3	317	224	9565	2.28995	0.612917	0.05491	0.0479796
KEGG_PATHWAY	mmu04024	cAMP signaling pathway	17	2.01183	0.00208	CAMK2A, ATP2A3, ATP1A4, PIK3CD, ADRB1, FOS, CALML4, ATP1B2, ATP1B1, GRIN2C, SSTR2, NFKB1, GRIN1, NFKBIA, FXYD2, CNGA3, RAPGEF3	305	224	9565	2.38005	0.474167	0.0352586	0.0298956	KEGG_PATHWAY	mmu04971	Gastric acid secretion	9	1.07527	0.00319864	CAMK2B, CAMK2A, ATP1A4, ITPR3, PRKCA, CALML4, ATP1B2, ATP1B1, SSTR2	317	75	9565	3.62082	0.62841	0.05491	0.0479796
KEGG_PATHWAY	mmu05161	Hepatitis B	14	1.6568	0.00217	STAT5A, PIK3CD, PRKCA, FOS, NFKB1, MAPK13, NFKBIA, CCNA1, MYC, CYCT, CYCS, E2F2, BID, TLR2	305	164	9565	2.67713	0.488619	0.0352586	0.0298956	KEGG_PATHWAY	mmu05207	Chemical carcinogenesis - receptor activation	17	2.03106	0.00364343	STAT5A, PAQR8, VDR, EPHX2, EPHX1, CHRNA9, PIK3CD, ADRB1, GSTT1, PRKCA, FOS, KLF4, NFKB1, KLF5, CYP2B23, MYC, FGF10	317	228	9565	2.24978	0.67628	0.0592537	0.0517751
KEGG_PATHWAY	mmu04115	p53 signaling pathway	9	1.06509	0.00252	CCND3, STEAP3, CCND2, AIFM2, SESN1, CYCT, CYCS, SFN, BID	305	75	9565	3.76328	0.541495	0.0389401	0.0330172	KEGG_PATHWAY	mmu04070	Phosphatidylinositol signaling system	10	1.19474	0.00435673	DGKE, ITPKA, ITPK1, PIK3CD, ITPR3, PRKCA, CALML4, PLCD1, PIK3C2B, MTM1	317	96	9565	3.14307	0.740545	0.0673115	0.0588159
KEGG_PATHWAY	mmu04072	Phospholipase D signaling pathway	13	1.53846	0.00278	PLA2G4F, DGKE, FCER1G, PLA2G4E, PDGFB, PIK3CD, PRKCA, AGPAT2, GRM2, MRAS, LPAR5, KIT, RAPGEF3	305	149	9565	2.73616	0.5773	0.0409473	0.0347191	KEGG_PATHWAY	mmu05022	Pathways of neurodegeneration - multiple diseases	28	3.34528	0.00481612	CAMK2B, CAMK2A, ATP2A3, ITPR3, CALML4, TUBA3B, TUBA3A, COX7A1, UBA1Y, PPP3CC, BID, XBP1, DNAI2, GPX2, DNAH10, WNT7B, NDUFA3, WIPI1, PRKCA, GRIN2C, NFKB1, GRIN1, PINK1, TUBB2A, CYCT, HAP1, MAPT, SLC25A31	317	481	9565	1.75646	0.775027	0.0708658	0.0619216
KEGG_PATHWAY	mmu05010	Alzheimer disease	24	2.84024	0.00307	COX8A, XBP1, ATP5PD, NDUFA3, WNT7B, ATP2A3, PIK3CD, UQCR11, WIPI1, CALML4, COX6C, TUBA3B, GRIN2C, COX6A1, TUBA3A, COX7A1, NFKB1, ATP5MC1, GRIN1, TUBB2A, CYCT, CYCS, MAPT, BID	305	389	9565	1.93485	0.613518	0.0431459	0.0365832	KEGG_PATHWAY	mmu05417	Lipid and atherosclerosis	16	1.91159	0.0055194	CAMK2B, ABCA1, XBP1, CAMK2A, PIK3CD, PRKCA, FOS, CALML4, NFKB1, NFKBIA, PPP3CC, CASP6, CYCT, BID, ABCG1, TLR2	317	217	9565	2.22477	0.819174	0.0765925	0.0669255
KEGG_PATHWAY	mmu04015	Rap1 signaling pathway	16	1.89349	0.0034	PDGFB, PIK3CD, PRKCA, CALML4, RAP1GAP, MAPK13, GRIN1, EFNA3, MRAS, LPAR5, ADORA2B, KIT, FGFR4, RAPGEF3, LAT, EPHA2	305	214	9565	2.34472	0.65108	0.0445938	0.037811	KEGG_PATHWAY	mmu05410	Hypertrophic cardiomyopathy	10	1.19474	0.00570106	CACNB1, CACNG6, CACNG7, SGCD, ITGB4, LAMA1, ATP2A3, CACNA2D2, SGCZ, ITGA9	317	100	9565	3.01735	0.829098	0.0765925	0.0669255
KEGG_PATHWAY	mmu04014	Ras signaling pathway	17	2.01183	0.00346	PLA2G4F, PLA2G1B, PLA2G4E, PDGFB, PIK3CD, PLAAT3, PRKCA, CALML4, NFKB1, GRIN1, EFNA3, MRAS, PLA2G10, KIT, FGFR4, LAT, EPHA2	305	236	9565	2.25903	0.657714	0.0445938	0.037811	KEGG_PATHWAY	mmu01100	Metabolic pathways	73	8.72162	0.00625948	DGKE, ST6GALNAC2, HEXB, PIK3CD, PYGM, ATP12A, PIK3C2B, MCEE, AOX3, ACP5, PGM2, GGT1, PDE8A, GPX2, URAH, PLA2G4E, ITPK1, SIRT4, PLAAT3, ELOVL7, AMPD3, SIRT1, CYP2B23, TST, BDH1, ITPKA, B4GALT6, PLPP3, PLPP2, MGLL, PDE9A, FBP2, BLVRA, PTGES, GSTP3, PLA2G1B, GSTT1, AK4, NPL, AGPAT2, COX7A1, AK8, PTS, PTGS1, MTM1, SELENBP1, LDHB, ADH1, EXTL1, CYP11A1, CBS, PRDM16, CHST10, MGAT3, SMYD1, INPP5K, B3GALN…	317	1650	9565	1.33495	0.856333	0.0805908	0.0704191
KEGG_PATHWAY	mmu05410	Hypertrophic cardiomyopathy	10	1.18343	0.00444	CACNB1, CACNG6, CACNG7, CACNG8, ITGB4, ITGA1, LMNA, ATP2A3, CACNA2D2, SGCZ	305	100	9565	3.13607	0.747063	0.0548624	0.0465176	KEGG_PATHWAY	mmu04510	Focal adhesion	15	1.79211	0.00707765	PDGFRA, ITGB4, LAMA1, FLT4, PDGFB, EMP1, PIK3CD, LAMC2, PRKCA, PARVB, MYLPF, COL6A4, SPP1, COL9A2, ITGA9	317	202	9565	2.24061	0.888616	0.0874798	0.0764386
KEGG_PATHWAY	mmu00190	Oxidative phosphorylation	12	1.42012	0.00524	COX8A, ATP5PD, NDUFA3, COX17, CYCT, CYCS, UQCR11, COX6C, ATP12A, COX6A1, COX7A1, ATP5MC1	305	141	9565	2.66899	0.802775	0.0622752	0.0528029	KEGG_PATHWAY	mmu04960	Aldosterone-regulated sodium reabsorption	6	0.716846	0.00782101	ATP1A4, PIK3CD, SFN, PRKCA, ATP1B2, ATP1B1	317	38	9565	4.76424	0.911627	0.0906033	0.0791679
KEGG_PATHWAY	mmu05169	Epstein-Barr virus infection	16	1.89349	0.0061	PIK3CD, CD3E, NFKB1, MAPK13, NFKBIA, CCNA1, CCND3, CCND2, OAS2, MYC, CYCT, CYCS, E2F2, NFKBIE, BID, TLR2	305	228	9565	2.20075	0.848951	0.0686071	0.0581717	KEGG_PATHWAY	mmu05200	Pathways in cancer	30	3.58423	0.00791679	CAMK2B, GSTP3, LAMA1, EPAS1, NOTCH4, FLT4, CAMK2A, PDGFB, PIK3CD, LAMC2, GSTT1, CALML4, MYC, E2F2, BID, IL13RA1, STAT5A, PDGFRA, WNT7B, IFNGR2, PRKCA, FOS, NFKB1, NFKBIA, BMP4, CCNA1, KIT, CYCT, FGFR4, FGF10	317	548	9565	1.65183	0.914225	0.0906033	0.0791679
KEGG_PATHWAY	mmu05208	Chemical carcinogenesis - reactive oxygen species	16	1.89349	0.00634	COX8A, ATP5PD, NDUFA3, EPHX2, EPHX1, PIK3CD, UQCR11, GSTT1, FOS, COX6C, COX6A1, COX7A1, NFKB1, ATP5MC1, MAPK13, NFKBIA	305	229	9565	2.19114	0.85978	0.0686071	0.0581717	KEGG_PATHWAY	mmu05235	PD-L1 expression and PD-1 checkpoint pathway in cancer	9	1.07527	0.00843476	NFKBIA, PPP3CC, IFNGR2, PIK3CD, FOS, NFKBIE, NFKB1, LAT, TLR2	317	88	9565	3.08593	0.927007	0.0930836	0.0813351
KEGG_PATHWAY	mmu05012	Parkinson disease	18	2.13018	0.00644	COX8A, XBP1, ATP5PD, NDUFA3, CAMK2A, UQCR11, CALML4, COX6C, TUBA3B, COX6A1, TUBA3A, COX7A1, ATP5MC1, UBA1Y, TUBB2A, CYCT, CYCS, MAPT	305	274	9565	2.06019	0.864128	0.0686071	0.0581717	KEGG_PATHWAY	mmu04260	Cardiac muscle contraction	9	1.07527	0.00901	CACNB1, CACNG6, CACNG7, ATP2A3, ATP1A4, CACNA2D2, ATP1B2, ATP1B1, COX7A1	317	89	9565	3.05125	0.93899	0.0949117	0.0829325
KEGG_PATHWAY	mmu04658	Th1 and Th2 cell differentiation	9	1.06509	0.00674	STAT5A, NFKBIA, IFNGR2, FOS, CD3E, NFKBIE, NFKB1, LAT, MAPK13	305	88	9565	3.20734	0.876266	0.0694191	0.0588602	KEGG_PATHWAY	mmu04978	Mineral absorption	7	0.83632	0.00921473	VDR, ATP1A4, SLC5A1, ATP1B2, STEAP1, ATP1B1, GM5134	317	55	9565	3.84026	0.942763	0.0949117	0.0829325
KEGG_PATHWAY	mmu00590	Arachidonic acid metabolism	9	1.06509	0.00721	PLA2G4F, PLA2G1B, PLA2G4E, EPHX2, PLA2G10, PLAAT3, GGT1, PTGES, PTGS1	305	89	9565	3.1713	0.893012	0.0718379	0.0609111	KEGG_PATHWAY	mmu04151	PI3K-Akt signaling pathway	22	2.62843	0.0100861	PDGFRA, NGFR, ITGB4, LAMA1, FLT4, PDGFB, PIK3CD, LAMC2, PRKCA, NFKB1, EFNA3, TCL1, MYC, KIT, COL6A4, SPP1, COL9A2, FGFR4, ITGA9, EPHA2, FGF10, TLR2	317	367	9565	1.80877	0.956388	0.0999838	0.0873645
KEGG_PATHWAY	mmu00592	alpha-Linolenic acid metabolism	5	0.591716	0.00747	PLA2G4F, PLA2G1B, PLA2G4E, PLA2G10, PLAAT3	305	25	9565	6.27213	0.901287	0.071952	0.0610079	KEGG_PATHWAY	mmu04072	Phospholipase D signaling pathway	12	1.43369	0.0103543	PDGFRA, DGKE, MRAS, PLA2G4E, KIT, PDGFB, PIK3CD, PRKCA, PLPP3, PLPP2, AGPAT2, RAPGEF3	317	149	9565	2.43008	0.959891	0.0999838	0.0873645
KEGG_PATHWAY	mmu04978	Mineral absorption	7	0.828402	0.00768	FXYD2, ATP1A4, ATP1B2, STEAP1, ATP1B1, STEAP2, ATOX1	305	55	9565	3.99136	0.907781	0.071952	0.0610079	KEGG_PATHWAY	mmu05214	Glioma	8	0.955795	0.0116835	CAMK2B, PDGFRA, CAMK2A, PDGFB, E2F2, PIK3CD, PRKCA, CALML4	317	75	9565	3.21851	0.973522	0.108565	0.0948625
KEGG_PATHWAY	mmu05200	Pathways in cancer	29	3.43195	0.00853	GSTP3, EPAS1, NOTCH4, CAMK2A, PDGFB, PIK3CD, LAMC2, GSTT1, CALML4, CCND3, CCND2, MYC, E2F2, BID, STAT5A, WNT7B, IFNGR2, PRKCA, FOS, NFKB1, NFKBIA, BMP4, CCNA1, PAX8, LPAR5, KIT, CYCT, CYCS, FGFR4	305	548	9565	1.6596	0.929168	0.0775332	0.0657401	KEGG_PATHWAY	mmu04666	Fc gamma R-mediated phagocytosis	9	1.07527	0.0123352	GSN, PLA2G4E, ASAP3, PIK3CD, PRKCA, FCGR2B, PLPP3, PLPP2, LAT	317	94	9565	2.88895	0.978405	0.108565	0.0948625
KEGG_PATHWAY	mmu05164	Influenza A	13	1.53846	0.0095	IFNGR2, PIK3CD, PRKCA, NFKB1, PYCARD, NFKBIA, SOCS3, CCND3, NXF2, OAS2, CYCT, CYCS, BID	305	174	9565	2.34304	0.94766	0.0838847	0.0711256	KEGG_PATHWAY	mmu05014	Amyotrophic lateral sclerosis	22	2.62843	0.0126195	XBP1, DNAI2, GPX2, DNAH10, NDUFA3, CHCHD10, ITPR3, WIPI1, TUBA3B, NXT2, GRIN2C, TUBA3A, COX7A1, GRIN1, PINK1, NXF2, TUBB2A, NXF3, PPP3CC, CYCT, HAP1, BID	317	375	9565	1.77018	0.980243	0.108565	0.0948625
KEGG_PATHWAY	mmu04210	Apoptosis	11	1.30178	0.0108	NFKBIA, CASP6, LMNA, CYCT, PIK3CD, CYCS, FOS, TUBA3B, BID, TUBA3A, NFKB1	305	135	9565	2.55531	0.964997	0.0926168	0.0785294	KEGG_PATHWAY	mmu05164	Influenza A	13	1.55317	0.0126483	IFNGR2, PIK3CD, PRKCA, NXT2, NFKB1, NFKBIA, SOCS3, NXF2, NXF3, OAS2, CYCT, SLC25A31, BID	317	174	9565	2.25434	0.98042	0.108565	0.0948625
KEGG_PATHWAY	mmu05134	Legionellosis	7	0.828402	0.0116	NFKBIA, PYCARD, CYCT, CYCS, NLRC4, NFKB1, TLR2	305	60	9565	3.65874	0.973123	0.0971729	0.0823925	KEGG_PATHWAY	mmu04921	Oxytocin signaling pathway	12	1.43369	0.0130487	CAMK2B, CACNB1, CACNG6, CACNG7, PPP3CC, PLA2G4E, CAMK2A, CACNA2D2, ITPR3, PRKCA, CALML4, FOS	317	154	9565	2.35118	0.982727	0.108975	0.0952206
KEGG_PATHWAY	mmu05020	Prion disease	17	2.01183	0.0135	COX8A, ATP5PD, NDUFA3, PIK3CD, UQCR11, COX6C, TUBA3B, GRIN2C, COX6A1, TUBA3A, COX7A1, ATP5MC1, MAPK13, GRIN1, TUBB2A, CYCT, CYCS	305	273	9565	1.95286	0.985144	0.108991	0.0924131	KEGG_PATHWAY	mmu04210	Apoptosis	11	1.31422	0.0138718	NFKBIA, CASP6, CYCT, PIK3CD, CTSH, ITPR3, FOS, TUBA3B, BID, TUBA3A, NFKB1	317	135	9565	2.45858	0.986652	0.1128	0.0985631
KEGG_PATHWAY	mmu05207	Chemical carcinogenesis - receptor activation	15	1.77515	0.014	STAT5A, PAQR8, EPHX2, EPHX1, CHRNA9, PIK3CD, ADRB1, GSTT1, PRKCA, FOS, KLF4, NFKB1, CCND3, KLF5, MYC	305	228	9565	2.0632	0.987153	0.108991	0.0924131	KEGG_PATHWAY	mmu04380	Osteoclast differentiation	11	1.31422	0.0145502	NFKBIA, SOCS3, PPP3CC, IFNGR2, ATP2A3, PIK3CD, ACP5, ITPR3, FOS, FCGR2B, NFKB1	317	136	9565	2.4405	0.989209	0.115282	0.100732
KEGG_PATHWAY	mmu04919	Thyroid hormone signaling pathway	10	1.18343	0.0141	BMP4, FXYD2, NOTCH4, MYC, ATP2A3, ATP1A4, PIK3CD, PRKCA, ATP1B2, ATP1B1	305	120	9565	2.61339	0.987608	0.108991	0.0924131	KEGG_PATHWAY	mmu04919	Thyroid hormone signaling pathway	10	1.19474	0.0177368	BMP4, NOTCH4, MYC, ATP2A3, ATP1A4, PIK3CD, PRKCA, ATP1B2, ATP1B1, PLCD1	317	120	9565	2.51446	0.996033	0.137017	0.119724
KEGG_PATHWAY	mmu04020	Calcium signaling pathway	16	1.89349	0.016	CAMK2A, ATP2A3, TFEB, PDGFB, ADRB1, PRKCA, CALML4, GRIN2C, GRIN1, GNA15, ERBB3, P2RX2, ADORA2B, ITPKA, CASQ2, FGFR4	305	255	9565	1.96773	0.993192	0.120722	0.10236	KEGG_PATHWAY	mmu00564	Glycerophospholipid metabolism	9	1.07527	0.0183978	DGKE, PLA2G1B, PLA2G4E, ETNK2, PLAAT3, GPCPD1, PLPP3, PLPP2, AGPAT2	317	101	9565	2.68873	0.996778	0.138657	0.121156
KEGG_PATHWAY	mmu05142	Chagas disease	9	1.06509	0.0166	NFKBIA, GNA15, IFNGR2, PIK3CD, FOS, CD3E, NFKB1, TLR2, MAPK13	305	103	9565	2.74025	0.994353	0.122226	0.103635	KEGG_PATHWAY	mmu05161	Hepatitis B	12	1.43369	0.019996	STAT5A, NFKBIA, CCNA1, MYC, CYCT, E2F2, PIK3CD, PRKCA, FOS, BID, NFKB1, TLR2	317	164	9565	2.20782	0.998053	0.147114	0.128546
KEGG_PATHWAY	mmu04664	Fc epsilon RI signaling pathway	7	0.828402	0.018	PLA2G4F, FCER1G, PLA2G4E, PIK3CD, PRKCA, LAT, MAPK13	305	66	9565	3.32613	0.996401	0.129638	0.10992	KEGG_PATHWAY	mmu04925	Aldosterone synthesis and secretion	9	1.07527	0.0215584	CAMK2B, CYP11A1, CAMK2A, ATP1A4, ITPR3, PRKCA, CALML4, ATP1B2, ATP1B1	317	104	9565	2.61117	0.998811	0.15492	0.135367
KEGG_PATHWAY	mmu04659	Th17 cell differentiation	9	1.06509	0.0185	STAT5A, NFKBIA, IFNGR2, FOS, CD3E, NFKBIE, NFKB1, LAT, MAPK13	305	105	9565	2.68806	0.996841	0.129638	0.10992	KEGG_PATHWAY	mmu04973	Carbohydrate digestion and absorption	6	0.716846	0.022166	ATP1A4, PIK3CD, SLC5A1, ATP1B2, ATP1B1, GM5134	317	49	9565	3.69471	0.999018	0.155666	0.136019
KEGG_PATHWAY	mmu04970	Salivary secretion	8	0.946746	0.0205	FXYD2, ATP1A4, ADRB1, PRKCA, CALML4, AQP5, ATP1B2, ATP1B1	305	87	9565	2.88374	0.998321	0.140528	0.119154	KEGG_PATHWAY	mmu04540	Gap junction	8	0.955795	0.0233235	PDGFRA, TUBB2A, PDGFB, ADRB1, ITPR3, PRKCA, TUBA3B, TUBA3A	317	86	9565	2.80684	0.999319	0.160155	0.139941
KEGG_PATHWAY	mmu05415	Diabetic cardiomyopathy	14	1.6568	0.021	COX8A, ATP5PD, NDUFA3, CAMK2A, ATP2A3, PIK3CD, UQCR11, PRKCA, COX6C, COX6A1, COX7A1, NFKB1, ATP5MC1, MAPK13	305	217	9565	2.02327	0.99858	0.141041	0.119588	KEGG_PATHWAY	mmu04970	Salivary secretion	8	0.955795	0.0246742	ATP1A4, ADRB1, ITPR3, PRKCA, CALML4, AQP5, ATP1B2, ATP1B1	317	87	9565	2.77457	0.999556	0.165746	0.144827
KEGG_PATHWAY	mmu04974	Protein digestion and absorption	9	1.06509	0.0215	SLC15A1, COL13A1, FXYD2, SLC1A1, ATP1A4, COL6A4, COL9A2, ATP1B2, ATP1B1	305	108	9565	2.61339	0.998788	0.141342	0.119844	KEGG_PATHWAY	mmu04658	Th1 and Th2 cell differentiation	8	0.955795	0.0260776	STAT5A, NFKBIA, PPP3CC, IFNGR2, FOS, NFKBIE, NFKB1, LAT	317	88	9565	2.74305	0.999716	0.171446	0.149807
KEGG_PATHWAY	mmu04151	PI3K-Akt signaling pathway	20	2.36686	0.0249	ITGB4, ITGA1, PDGFB, PIK3CD, LAMC2, PRKCA, NFKB1, EFNA3, CCND3, TCL1, CCND2, ERBB3, LPAR5, MYC, KIT, COL6A4, COL9A2, FGFR4, EPHA2, TLR2	305	367	9565	1.70903	0.999585	0.157288	0.133364	KEGG_PATHWAY	mmu00590	Arachidonic acid metabolism	8	0.955795	0.0275346	CYP2B23, PLA2G1B, PLA2G4E, EPHX2, PLAAT3, GGT1, PTGES, PTGS1	317	89	9565	2.71222	0.999821	0.177254	0.154882
KEGG_PATHWAY	mmu04921	Oxytocin signaling pathway	11	1.30178	0.0249	CACNB1, CACNG6, CACNG7, PLA2G4F, CACNG8, PLA2G4E, CAMK2A, CACNA2D2, PRKCA, CALML4, FOS	305	154	9565	2.24005	0.999592	0.157288	0.133364	KEGG_PATHWAY	mmu00562	Inositol phosphate metabolism	7	0.83632	0.0312781	ITPKA, ITPK1, PIK3CD, INPP5K, PLCD1, PIK3C2B, MTM1	317	72	9565	2.93353	0.999946	0.197244	0.172349
KEGG_PATHWAY	mmu05152	Tuberculosis	12	1.42012	0.0285	CD74, FCER1G, IFNGR2, CAMK2A, CYCT, CYCS, CALML4, FCGR2B, BID, NFKB1, TLR2, MAPK13	305	180	9565	2.09071	0.999869	0.167822	0.142295	KEGG_PATHWAY	mmu05222	Small cell lung cancer	8	0.955795	0.03565	NFKBIA, LAMA1, MYC, CYCT, E2F2, PIK3CD, LAMC2, NFKB1	317	94	9565	2.56796	0.999987	0.219949	0.192189
KEGG_PATHWAY	mmu04380	Osteoclast differentiation	10	1.18343	0.0292	NFKBIA, SOCS3, IFNGR2, ATP2A3, PIK3CD, ACP5, FOS, FCGR2B, NFKB1, MAPK13	305	136	9565	2.30593	0.999896	0.167822	0.142295	KEGG_PATHWAY	mmu05152	Tuberculosis	12	1.43369	0.0363023	CAMK2B, CD74, PPP3CC, VDR, IFNGR2, CAMK2A, CYCT, CALML4, FCGR2B, BID, NFKB1, TLR2	317	180	9565	2.01157	0.999989	0.219949	0.192189
KEGG_PATHWAY	mmu04360	Axon guidance	12	1.42012	0.0295	SEMA6C, SEMA4A, EFNA3, SEMA7A, EFNB3, ABLIM2, CAMK2A, PIK3CD, PRKCA, SEMA4G, RND1, EPHA2	305	181	9565	2.07916	0.999905	0.167822	0.142295	KEGG_PATHWAY	mmu05132	Salmonella infection	15	1.79211	0.0397784	AHNAK2, PIK3CD, NOD1, FOS, TUBA3B, TUBA3A, NFKB1, PIK3C2B, MYLPF, NFKBIA, TUBB2A, MYC, CYCT, S100A10, TLR2	317	252	9565	1.79604	0.999996	0.234218	0.204656
KEGG_PATHWAY	mmu04666	Fc gamma R-mediated phagocytosis	8	0.946746	0.0298	PLA2G4F, PLA2G4E, ARPC1B, ASAP3, PIK3CD, PRKCA, FCGR2B, LAT	305	94	9565	2.66899	0.999912	0.167822	0.142295	KEGG_PATHWAY	mmu04218	Cellular senescence	12	1.43369	0.0401733	CCNA1, PPP3CC, MRAS, TRPV4, MYC, E2F2, PIK3CD, ITPR3, CALML4, SLC25A31, SIRT1, NFKB1	317	183	9565	1.97859	0.999997	0.234218	0.204656
KEGG_PATHWAY	mmu05222	Small cell lung cancer	8	0.946746	0.0298	NFKBIA, MYC, CYCT, E2F2, PIK3CD, CYCS, LAMC2, NFKB1	305	94	9565	2.66899	0.999912	0.167822	0.142295	KEGG_PATHWAY	mmu05017	Spinocerebellar ataxia	10	1.19474	0.0438845	XBP1, ATP2A3, CYCT, PIK3CD, ITPR3, PRKCA, WIPI1, SLC25A31, GRIN2C, GRIN1	317	141	9565	2.13996	0.999999	0.251117	0.219423
KEGG_PATHWAY	mmu04917	Prolactin signaling pathway	7	0.828402	0.0299	STAT5A, SOCS3, CCND2, PIK3CD, FOS, NFKB1, MAPK13	305	74	9565	2.96655	0.999915	0.167822	0.142295	KEGG_PATHWAY	mmu04713	Circadian entrainment	8	0.955795	0.0452105	CAMK2B, CAMK2A, ITPR3, PRKCA, CALML4, FOS, GRIN2C, GRIN1	317	99	9565	2.43826	0.999999	0.254001	0.221942
KEGG_PATHWAY	mmu04964	Proximal tubule bicarbonate reclamation	4	0.473373	0.0313	FXYD2, ATP1A4, ATP1B2, ATP1B1	305	22	9565	5.70194	0.999946	0.171503	0.145417	KEGG_PATHWAY	mmu00920	Sulfur metabolism	3	0.358423	0.0491459	SELENBP1, TST, SUOX	317	11	9565	8.22914	1	0.27118	0.236954
KEGG_PATHWAY	mmu04971	Gastric acid secretion	7	0.828402	0.0316	CAMK2A, ATP1A4, PRKCA, CALML4, ATP1B2, ATP1B1, SSTR2	305	75	9565	2.92699	0.999951	0.171503	0.145417	KEGG_PATHWAY	mmu05162	Measles	10	1.19474	0.0508331	STAT5A, NFKBIA, OAS2, CYCT, PIK3CD, FOS, FCGR2B, BID, NFKB1, TLR2	317	145	9565	2.08093	1	0.275569	0.240788
KEGG_PATHWAY	mmu05231	Choline metabolism in cancer	8	0.946746	0.0362	PLA2G4F, DGKE, SLC44A2, PLA2G4E, PDGFB, PIK3CD, PRKCA, FOS	305	98	9565	2.56005	0.999989	0.191171	0.162093	KEGG_PATHWAY	mmu04975	Fat digestion and absorption	5	0.597372	0.052595	ABCA1, PLA2G1B, PLPP3, PLPP2, AGPAT2	317	43	9565	3.50855	1	0.280204	0.244839
KEGG_PATHWAY	mmu04370	VEGF signaling pathway	6	0.710059	0.0365	PLA2G4F, PLA2G4E, PIK3CD, HSPB1, PRKCA, MAPK13	305	58	9565	3.24421	0.99999	0.191171	0.162093	KEGG_PATHWAY	mmu04630	JAK-STAT signaling pathway	11	1.31422	0.0570252	STAT5A, PDGFRA, SOCS3, IFNGR2, MYC, FHL1, AOX3, PDGFB, PIK3CD, LIFR, IL13RA1	317	171	9565	1.94099	1	0.289078	0.252592
KEGG_PATHWAY	mmu04714	Thermogenesis	14	1.6568	0.0391	COX8A, COA4, SMARCD3, ATP5PD, NDUFA3, COX17, BMP8A, UQCR11, COX6C, COX6A1, COX7A1, ATP5MC1, MAPK13, MGLL	305	237	9565	1.85253	0.999995	0.201142	0.170548	KEGG_PATHWAY	mmu05010	Alzheimer disease	20	2.38949	0.0572233	XBP1, NDUFA3, WNT7B, ATP2A3, PIK3CD, ITPR3, WIPI1, CALML4, TUBA3B, GRIN2C, TUBA3A, COX7A1, NFKB1, GRIN1, TUBB2A, PPP3CC, CYCT, MAPT, SLC25A31, BID	317	389	9565	1.55134	1	0.289078	0.252592
KEGG_PATHWAY	mmu00920	Sulfur metabolism	3	0.35503	0.0458	SELENBP1, TST, SUOX	305	11	9565	8.55291	0.999999	0.230582	0.19551	KEGG_PATHWAY	mmu04659	Th17 cell differentiation	8	0.955795	0.0586796	STAT5A, NFKBIA, PPP3CC, IFNGR2, FOS, NFKBIE, NFKB1, LAT	317	105	9565	2.29893	1	0.289078	0.252592
KEGG_PATHWAY	mmu05418	Fluid shear stress and atherosclerosis	10	1.18343	0.0463	BMP4, GSTP3, TRPV4, PDGFB, PIK3CD, GSTT1, CALML4, FOS, NFKB1, MAPK13	305	148	9565	2.11896	1	0.230582	0.19551	KEGG_PATHWAY	mmu04012	ErbB signaling pathway	7	0.83632	0.0589382	STAT5A, CAMK2B, MYC, CAMK2A, PIK3CD, PRKCA, HBEGF	317	84	9565	2.51446	1	0.289078	0.252592
KEGG_PATHWAY	mmu04925	Aldosterone synthesis and secretion	8	0.946746	0.0475	CYP11A1, CAMK2A, PDE2A, ATP1A4, PRKCA, CALML4, ATP1B2, ATP1B1	305	104	9565	2.41236	1	0.232914	0.197487	KEGG_PATHWAY	mmu04662	B cell receptor signaling pathway	7	0.83632	0.0589382	NFKBIA, PPP3CC, PIK3CD, FOS, FCGR2B, NFKBIE, NFKB1	317	84	9565	2.51446	1	0.289078	0.252592
KEGG_PATHWAY	mmu04012	ErbB signaling pathway	7	0.828402	0.0506	STAT5A, ERBB3, MYC, CAMK2A, PIK3CD, PRKCA, HBEGF	305	84	9565	2.61339	1	0.244309	0.207148	KEGG_PATHWAY	mmu04911	Insulin secretion	7	0.83632	0.0646231	CAMK2B, CAMK2A, ATP1A4, ITPR3, PRKCA, ATP1B2, ATP1B1	317	86	9565	2.45598	1	0.312008	0.272629
KEGG_PATHWAY	mmu05167	Kaposi sarcoma-associated herpesvirus infection	13	1.53846	0.0522	PDGFB, PIK3CD, FOS, CALML4, NFKB1, MAPK13, NFKBIA, ZFP36, MYC, CYCT, CYCS, E2F2, BID	305	223	9565	1.8282	1	0.245345	0.208027	KEGG_PATHWAY	mmu04974	Protein digestion and absorption	8	0.955795	0.0662514	SLC15A1, COL13A1, SLC1A1, ATP1A4, COL6A4, COL9A2, ATP1B2, ATP1B1	317	108	9565	2.23507	1	0.314949	0.275198
KEGG_PATHWAY	mmu04310	Wnt signaling pathway	11	1.30178	0.0524	PORCN, CCND3, CCND2, SFRP5, WNT7B, MYC, CAMK2A, PRKCA, ROR2, NOTUM, MCC	305	175	9565	1.97124	1	0.245345	0.208027	KEGG_PATHWAY	mmu05012	Parkinson disease	15	1.79211	0.070186	CAMK2B, XBP1, NDUFA3, CAMK2A, ITPR3, CALML4, TUBA3B, TUBA3A, COX7A1, UBA1Y, PINK1, TUBB2A, CYCT, MAPT, SLC25A31	317	274	9565	1.65183	1	0.328598	0.287125
KEGG_PATHWAY	mmu04510	Focal adhesion	12	1.42012	0.0575	MYLPF, CCND3, CCND2, ITGB4, ITGA1, COL6A4, PDGFB, EMP1, PIK3CD, PRKCA, LAMC2, COL9A2	305	202	9565	1.86301	1	0.262918	0.222928	KEGG_PATHWAY	mmu00565	Ether lipid metabolism	5	0.597372	0.0731221	PLA2G1B, PLA2G4E, PLAAT3, PLPP3, PLPP2	317	48	9565	3.14307	1	0.335055	0.292766
KEGG_PATHWAY	mmu05145	Toxoplasmosis	8	0.946746	0.0584	NFKBIA, IFNGR2, CYCT, CYCS, LAMC2, NFKB1, TLR2, MAPK13	305	109	9565	2.3017	1	0.262918	0.222928	KEGG_PATHWAY	mmu04512	ECM-receptor interaction	7	0.83632	0.0737337	ITGB4, LAMA1, COL6A4, SPP1, LAMC2, COL9A2, ITGA9	317	89	9565	2.3732	1	0.335055	0.292766
KEGG_PATHWAY	mmu04350	TGF-beta signaling pathway	8	0.946746	0.0608	BMP4, LEFTY1, MYC, BMP8A, INHBB, SMAD6, LEFTY2, SMAD7	305	110	9565	2.28077	1	0.262918	0.222928	KEGG_PATHWAY	mmu04912	GnRH signaling pathway	7	0.83632	0.0769257	CAMK2B, PLA2G4E, CAMK2A, ITPR3, PRKCA, CALML4, HBEGF	317	90	9565	2.34683	1	0.3413	0.298224
KEGG_PATHWAY	mmu04720	Long-term potentiation	6	0.710059	0.0613	CAMK2A, PRKCA, CALML4, GRIN2C, RAPGEF3, GRIN1	305	67	9565	2.80842	1	0.262918	0.222928	KEGG_PATHWAY	mmu05230	Central carbon metabolism in cancer	6	0.716846	0.0773173	LDHB, PDGFRA, MYC, IDH2, KIT, PIK3CD	317	69	9565	2.62378	1	0.3413	0.298224
KEGG_PATHWAY	mmu00230	Purine metabolism	9	1.06509	0.0635	URAH, PDE2A, PGM2, AK4, NME4, AMPD3, PDE8A, AK8, PDE9A	305	134	9565	2.10631	1	0.262918	0.222928	KEGG_PATHWAY	mmu05221	Acute myeloid leukemia	6	0.716846	0.0811334	STAT5A, CCNA1, MYC, KIT, PIK3CD, NFKB1	317	70	9565	2.5863	1	0.353102	0.308536
KEGG_PATHWAY	mmu00565	Ether lipid metabolism	5	0.591716	0.0653	PLA2G4F, PLA2G1B, PLA2G4E, PLA2G10, PLAAT3	305	48	9565	3.26673	1	0.262918	0.222928	KEGG_PATHWAY	mmu04724	Glutamatergic synapse	8	0.955795	0.0891977	PPP3CC, PLA2G4E, SLC1A1, GRIK3, ITPR3, PRKCA, GRIN2C, GRIN1	317	116	9565	2.08093	1	0.382807	0.334491
KEGG_PATHWAY	mmu05030	Cocaine addiction	5	0.591716	0.0653	GRM2, GRIN2C, RGS9, NFKB1, GRIN1	305	48	9565	3.26673	1	0.262918	0.222928	KEGG_PATHWAY	mmu04066	HIF-1 signaling pathway	8	0.955795	0.0923465	CAMK2B, LDHB, EPAS1, IFNGR2, CAMK2A, PIK3CD, PRKCA, NFKB1	317	117	9565	2.06315	1	0.390891	0.341555
KEGG_PATHWAY	mmu04625	C-type lectin receptor signaling pathway	8	0.946746	0.0657	NFKBIA, PYCARD, MRAS, FCER1G, PIK3CD, CALML4, NFKB1, MAPK13	305	112	9565	2.24005	1	0.262918	0.222928	KEGG_PATHWAY	mmu05168	Herpes simplex virus 1 infection	12	1.43369	0.0951776	NFKBIA, CD74, SOCS3, NXF2, NXF3, OAS2, IFNGR2, CYCT, PIK3CD, BID, NFKB1, TLR2	317	213	9565	1.69992	1	0.397431	0.34727
KEGG_PATHWAY	mmu04912	GnRH signaling pathway	7	0.828402	0.0664	PLA2G4F, PLA2G4E, CAMK2A, PRKCA, CALML4, HBEGF, MAPK13	305	90	9565	2.43916	1	0.262918	0.222928	KEGG_PATHWAY	mmu04918	Thyroid hormone synthesis	6	0.716846	0.0973759	GPX2, ATP1A4, ITPR3, PRKCA, ATP1B2, ATP1B1	317	74	9565	2.4465	1	0.401189	0.350553
KEGG_PATHWAY	mmu05016	Huntington disease	16	1.89349	0.0666	COX8A, ATP5PD, NDUFA3, UQCR11, WIPI1, COX6C, TUBA3B, COX6A1, TUBA3A, COX7A1, ATP5MC1, GRIN1, TUBB2A, CYCT, CYCS, HAP1	305	308	9565	1.62912	1	0.262918	0.222928
KEGG_PATHWAY	mmu04218	Cellular senescence	11	1.30178	0.0667	CCNA1, CCND3, CCND2, MRAS, TRPV4, MYC, E2F2, PIK3CD, CALML4, NFKB1, MAPK13	305	183	9565	1.88507	1	0.262918	0.222928
KEGG_PATHWAY	mmu05031	Amphetamine addiction	6	0.710059	0.0679	CAMK2A, PRKCA, CALML4, FOS, GRIN2C, GRIN1	305	69	9565	2.72701	1	0.262918	0.222928
KEGG_PATHWAY	mmu05230	Central carbon metabolism in cancer	6	0.710059	0.0679	LDHB, MYC, IDH2, KIT, PIK3CD, LDHAL6B	305	69	9565	2.72701	1	0.262918	0.222928
KEGG_PATHWAY	mmu05135	Yersinia infection	9	1.06509	0.0681	NFKBIA, PYCARD, ARPC1B, PIK3CD, NLRC4, FOS, NFKB1, LAT, MAPK13	305	136	9565	2.07534	1	0.262918	0.222928
KEGG_PATHWAY	mmu04973	Carbohydrate digestion and absorption	5	0.591716	0.0694	FXYD2, ATP1A4, PIK3CD, ATP1B2, ATP1B1	305	49	9565	3.20007	1	0.264907	0.224614
KEGG_PATHWAY	mmu05221	Acute myeloid leukemia	6	0.710059	0.0713	STAT5A, CCNA1, MYC, KIT, PIK3CD, NFKB1	305	70	9565	2.68806	1	0.265477	0.225097
KEGG_PATHWAY	mmu05140	Leishmaniasis	6	0.710059	0.0713	NFKBIA, IFNGR2, FOS, NFKB1, TLR2, MAPK13	305	70	9565	2.68806	1	0.265477	0.225097
KEGG_PATHWAY	mmu04972	Pancreatic secretion	8	0.946746	0.0734	PLA2G1B, FXYD2, PLA2G10, ATP2A3, ATP1A4, PRKCA, ATP1B2, ATP1B1	305	115	9565	2.18161	1	0.270173	0.229079
KEGG_PATHWAY	mmu01522	Endocrine resistance	7	0.828402	0.0753	BIK, NOTCH4, E2F2, PIK3CD, FOS, HBEGF, MAPK13	305	93	9565	2.36048	1	0.273614	0.231997
KEGG_PATHWAY	mmu04724	Glutamatergic synapse	8	0.946746	0.0762	GRM2, PLA2G4F, PLA2G4E, SLC1A1, GRIK3, PRKCA, GRIN2C, GRIN1	305	116	9565	2.1628	1	0.273614	0.231997
KEGG_PATHWAY	mmu05168	Herpes simplex virus 1 infection	12	1.42012	0.0771	NFKBIA, CD74, SOCS3, NXF2, OAS2, IFNGR2, CYCT, PIK3CD, CYCS, BID, NFKB1, TLR2	305	213	9565	1.7668	1	0.273971	0.232299
KEGG_PATHWAY	mmu04066	HIF-1 signaling pathway	8	0.946746	0.0789	LDHB, EPAS1, IFNGR2, CAMK2A, PIK3CD, PRKCA, NFKB1, LDHAL6B	305	117	9565	2.14432	1	0.277102	0.234954
KEGG_PATHWAY	mmu05017	Spinocerebellar ataxia	9	1.06509	0.0802	XBP1, ATP2A3, CYCT, PIK3CD, CYCS, PRKCA, WIPI1, GRIN2C, GRIN1	305	141	9565	2.00174	1	0.278514	0.236151
KEGG_PATHWAY	mmu00480	Glutathione metabolism	6	0.710059	0.0821	GGCT, GSTP3, NAT8F2, IDH2, GSTT1, GGT1	305	73	9565	2.57759	1	0.280631	0.237946
KEGG_PATHWAY	mmu05170	Human immunodeficiency virus 1 infection	13	1.53846	0.0826	PIK3CD, PRKCA, FOS, CALML4, CD3E, NFKB1, MAPK13, NFKBIA, CYCT, CYCS, BID, AP1M2, TLR2	305	241	9565	1.69165	1	0.280631	0.237946
KEGG_PATHWAY	mmu05160	Hepatitis C	10	1.18343	0.0848	NFKBIA, SOCS3, OAS2, MYC, CYCT, E2F2, PIK3CD, CYCS, BID, NFKB1	305	167	9565	1.87788	1	0.284957	0.241614
KEGG_PATHWAY	mmu04918	Thyroid hormone synthesis	6	0.710059	0.0859	PAX8, FXYD2, ATP1A4, PRKCA, ATP1B2, ATP1B1	305	74	9565	2.54276	1	0.285424	0.24201
KEGG_PATHWAY	mmu05214	Glioma	6	0.710059	0.0898	CAMK2A, PDGFB, E2F2, PIK3CD, PRKCA, CALML4	305	75	9565	2.50885	1	0.29513	0.250239
KEGG_PATHWAY	mmu04660	T cell receptor signaling pathway	8	0.946746	0.0936	NFKBIA, PIK3CD, FOS, CD3E, NFKBIE, NFKB1, LAT, MAPK13	305	122	9565	2.05644	1	0.301745	0.255849
KEGG_PATHWAY	mmu05220	Chronic myeloid leukemia	6	0.710059	0.0937	STAT5A, NFKBIA, MYC, E2F2, PIK3CD, NFKB1	305	76	9565	2.47584	1	0.301745	0.255849
KEGG_PATHWAY	mmu05166	Human T-cell leukemia virus 1 infection	13	1.53846	0.0949	STAT5A, PIK3CD, FOS, CD3E, NFKB1, NFKBIA, CCNA1, ZFP36, CCND3, CCND2, MYC, TSPO, E2F2	305	247	9565	1.65056	1	0.30231	0.256327
KEGG_PATHWAY	mmu00591	Linoleic acid metabolism	5	0.591716	0.0968	PLA2G4F, PLA2G1B, PLA2G4E, PLA2G10, PLAAT3	305	55	9565	2.85097	1	0.305129	0.258718
KEGG_PATHWAY	mmu05133	Pertussis	6	0.710059	0.0978	PYCARD, NOD1, CALML4, FOS, NFKB1, MAPK13	305	77	9565	2.44369	1	0.305255	0.258825

## Sheet: Fig.1n
Fgiure 1n： Relative levels of intracellular cysteine, pyruvate and acetyl-CoA in control, Lmna G609G/+ and Lmna G609G/G609G mESCs
Relative cysteine level				Relative Pruvate level				Relative Aectyl-CoA level
Lmna +/+	Lmna G609G/+	Lmna G609G/G609G		Lmna +/+	Lmna G609G/+	Lmna G609G/G609G		Lmna +/+	Lmna G609G/+	Lmna G609G/G609G
0.963039	0.15501	0.006699		0.897804	0.625099	0.231636		0.971736	0.620807	0.405736
1.00358	0.6412	0.033889		1.0611	0.446358	0.319233		1.00776	0.591088	0.456656
1.03338	0.20226	0.044735		0.987563	0.474647	0.27922		1.0205	0.616683	0.468911
1.3123	0.42156	0.1452		1.0535	0.2804	0.3741		0.953426	0.7586	0.5341
0.91236	0.5214	0.3674		1.2145	0.6741	0.5412		1.34535	0.8145	0.6239
0.81254	0.3415	0.2741		0.9541	0.2456	0.1452		0.759238	0.43695	0.3141
