# Supplementary material for: Lamin A/C-regulated cysteine catabolic flux modulates stem cell fate through epigenome reprogramming
Source: Springer Nature journal article supplement (doi:10.1038/s42255-025-01443-2), 2026-01-28
Supplement: MOESM11 [file 42255_2025_1443_MOESM11_ESM.xlsx]

## Sheet: Fig.2f
Figure 2f: TOBIAS motif analysis showing significant enrichment of retinoic acid–responsive motifs in accessible chromatin regions within ±5 kb of the Lmna transcription start site in mESCs cultured under primed conditions compared to naïve conditions
	Differential binding score	-logP value
Stat6	0.29209	143.987
RARA::RXRG	0.27579	21.339
Rarb	0.27579	148.066
EOMES	0.26676	126.6
TBR1	0.26676	106.069
TBX18	0.26676	128.099
TBX2	0.26676	103.27
TBX3	0.26676	83.1535
Tbx6	0.26676	98.0952
FIGLA	0.23867	192.936
MGA	0.23867	116.973
Ptf1A	0.23867	177.316
TBX1	0.23867	113.447
TBX15	0.23867	108.513
TBX21	0.23867	110.553
TBX4	0.23867	108.513
TBX5	0.23867	151.327
ZBTB18	0.23867	104.49
ZEB1	0.23867	192.936
ZNF784	0.22561	57.3955
BHLHE22	0.22344	178.886
ERF::NHLH1	0.22344	170.849
ETV5::FIGLA	0.22344	162.641
Neurod2	0.22344	178.886
NHLH1	0.22344	183.709
NHLH2	0.22344	173.057
Olig2	0.22344	178.886
Tcf12	0.22344	178.886
TFAP4	0.22344	132.845
Twist2	0.22344	178.886
IKZF2	0.1941	97.6243
EWSR1-FLI1	0.18175	179.209
ZNF530	0.18175	199.605
ZNF740	0.18175	187.903
EGR1	0.17246	168.737
KLF1	0.17246	79.6235
KLF10	0.17246	163.204
KLF11	0.17246	124.266
KLF12	0.17246	190.786
KLF13	0.17246	114.238
KLF14	0.17246	166.046
KLF15	0.17246	179.178
KLF16	0.17246	181.224
KLF2	0.17246	109.154
KLF3	0.17246	147.56
KLF4	0.17246	102.632
KLF5	0.17246	110.958
KLF6	0.17246	159.609
KLF7	0.17246	136.775
KLF9	0.17246	50.8258
MAZ	0.17246	203.303
PATZ1	0.17246	203.107
SP1	0.17246	202.575
SP2	0.17246	203.162
SP3	0.17246	141.815
SP4	0.17246	184.445
SP9	0.17246	178.462
ZNF148	0.17246	208.804
ZNF281	0.17246	206.685
ZNF708	0.16666	163.483
ZBED4	0.16623	180.712
EGR3	0.16598	178.824
EGR4	0.16598	184.213
THAP1	0.14731	160.232
SP2	0.12071	203.162
SP5	0.12071	199.169
KLF17	0.11204	173.933
Wt1	0.09042	207.903
TCF7L1	0.08915	191.756
ZBTB7C	0.07134	159.452
ZBTB12	0.06212	100.68
PRDM9	0.06094	201.914
SP8	0.05896	177.473
NFYB	0.05158	142.329
Plagl1	0.05158	164.38
Pparg::Rxra	0.05158	137.467
ZNF148	0.05158	208.804
ZNF257	0.05158	183.005
ZNF530	0.05158	199.605
ARNT2	0.04974	109.487
Arntl	0.04974	124.171
HES1	0.04974	99.1127
HES2	0.04974	11.8769
HEY2	0.04974	79.0635
HIF1A	0.04974	90.5013
MLXIPL	0.04974	117.203
TFEB	0.04974	147.232
TFEC	0.04974	138.611
ZNF740	0.04767	187.903
ZKSCAN5	0.03495	170.81
PRDM9	0.02164	201.914
ASCL1	0.01005	202.4
FIGLA	0.01005	192.936
SNAI1	0.01005	182.773
TCF12	0.01005	187.468
TCF3	0.01005	182.773
TCF4	0.01005	190.638
ZEB1	0.01005	192.936
Arnt	0.00389	68.612
ARNT::HIF1A	0.00389	112.125
HES5	0.00389	38.2701
HES6	0.00389	146.644
HEY1	0.00389	54.3691
MAX	0.00389	68.612
MAX::MYC	0.00389	105.671
MLX	0.00389	103.191
Mlxip	0.00389	68.612
MNT	0.00389	68.612
MYC	0.00389	43.4849
MYCN	0.00389	39.6481
Npas2	0.00389	77.7186
SOHLH2	0.00389	54.9377
TFE3	0.00389	142.59
USF2	0.00389	137.247
ZNF320	0.00233	203.442
NFIA	-0.01588	79.3326
NFIC	-0.01588	85.5421
NFIX	-0.01588	79.3326
RFX4	-0.01588	103.627
Rfx6	-0.01588	79.5927
KLF12	-0.01927	190.786
PATZ1	-0.01927	203.107
SP2	-0.01927	203.162
ZNF148	-0.01927	208.804
ZNF281	-0.01927	206.685
ZFP14	-0.02146	166.885
EGR4	-0.0316	184.213
MAZ	-0.03598	203.303
ZNF257	-0.03598	183.005
SOX13	-0.04203	176.216
SOX15	-0.04203	193.4
SOX2	-0.04203	176.216
Sox3	-0.04203	176.216
THAP1	-0.05845	160.232
EGR3	-0.06681	178.824
EHF	-0.06681	165.819
ELF1	-0.06681	111.112
ELF2	-0.06681	90.3735
ELF3	-0.06681	154.356
ELF4	-0.06681	88.2707
Elf5	-0.06681	151.716
ELK1::SREBF2	-0.06681	34.5593
ELK4	-0.06681	70.1235
Erg	-0.06681	121.998
ETV1	-0.06681	76.7486
GABPA	-0.06681	123.6
IKZF2	-0.06681	97.6243
Ikzf3	-0.06681	75.7012
Nfatc1	-0.06681	155.585
NFATC3	-0.06681	155.585
NKX2-4	-0.06681	95.4539
NKX2-8	-0.06681	82.0394
STAT1	-0.06681	141.583
STAT3	-0.06681	136.164
Stat4	-0.06681	149.707
Stat5a	-0.06681	147.595
Stat5a::Stat5b	-0.06681	137.08
Stat5b	-0.06681	75.4558
ZBTB11	-0.06681	64.6257
ZBTB7A	-0.06681	140.462
ZNF135	-0.06681	143.453
ZNF175	-0.06681	115.859
IKZF2	-0.0702	97.6243
Zic1::Zic2	-0.08033	199.967
Zic3	-0.08033	199.967
Smad4	-0.08199	130.291
ZNF213	-0.08234	187.385
EGR1	-0.08598	168.737
Wt1	-0.08598	207.903
ZNF740	-0.08598	187.903
SOX12	-0.09255	158.013
ESR1	-0.10026	126.953
RUNX2	-0.10026	89.4413
SP8	-0.10239	177.473
KLF17	-0.1157	173.933
NR2C2	-0.1157	163.764
Pparg::Rxra	-0.1157	137.467
ZNF148	-0.1157	208.804
ZNF701	-0.1157	195.881
ZNF768	-0.1157	169.806
ETV2::FIGLA	-0.11706	156.656
TFAP4::ETV1	-0.11706	153.761
ZNF257	-0.11706	183.005
KLF10	-0.12374	163.204
KLF11	-0.12374	124.266
KLF12	-0.12374	190.786
KLF14	-0.12374	166.046
KLF16	-0.12374	181.224
KLF6	-0.12374	159.609
PATZ1	-0.12374	203.107
SP1	-0.12374	202.575
SP2	-0.12374	203.162
SP3	-0.12374	141.815
SP4	-0.12374	184.445
SP9	-0.12374	178.462
ZNF148	-0.12374	208.804
ZNF281	-0.12374	206.685
ZNF675	-0.12544	93.3309
PRDM9	-0.12619	201.914
RARA::RXRG	-0.12619	21.339
Hand1	-0.12734	142.786
Sox11	-0.12907	166.056
SOX14	-0.12907	164.424
Sox17	-0.12907	186.446
Sox6	-0.12907	179.622
Sox7	-0.12907	182.776
ZNF530	-0.13199	199.605
IRF2	-0.13207	90.748
E2F6	-0.13226	179.292
KLF1	-0.13226	79.6235
KLF15	-0.13226	179.178
KLF2	-0.13226	109.154
KLF4	-0.13226	102.632
KLF5	-0.13226	110.958
KLF7	-0.13226	136.775
MAZ	-0.13226	203.303
PRDM9	-0.13226	201.914
Prdm15	-0.13436	65.6373
ZNF684	-0.13437	140.468
CEBPA	-0.13611	156.227
CEBPD	-0.13611	144.344
SOX18	-0.13613	177.811
SOX4	-0.13613	177.984
Sox5	-0.13613	186.102
SOX8	-0.13613	181.996
SOX9	-0.13613	183.663
Hic1	-0.14129	111.6
CTCF	-0.14535	184.236
ZBED4	-0.14535	180.712
RARA::RXRA	-0.15393	43.8764
ZBTB7B	-0.18385	165.69
HIC2	-0.18792	127.636
NR4A1	-0.21631	171.391
NR4A2	-0.21631	168.59
FEZF2	-0.21808	173.591
INSM1	-0.23572	182.188
TFAP2A	-0.23572	156.51
TFAP2B	-0.23572	146.035
TFAP2C	-0.23572	166.891
TFAP2E	-0.23572	152.094
ZNF701	-0.23572	195.881
TFAP2A	-0.23956	158.647
Wt1	-0.24465	207.903
CTCF	-0.24569	183.76
HAND2	-0.25341	142.073
SP5	-0.26016	199.169
SP8	-0.26016	177.473
SP9	-0.26016	178.462
ZNF148	-0.26016	208.804
ZNF281	-0.26016	206.685
ZNF740	-0.26016	187.903
MYB	-0.26168	133.363
Hic1	-0.26545	111.6
FLI1::FOXI1	-0.28244	128.907
IKZF1	-0.28244	144.948
Ahr::Arnt	-0.29001	163.537
FEZF2	-0.29437	173.591
PRDM9	-0.29437	201.914
Wt1	-0.29437	207.903
ZFP14	-0.29437	166.885
ZNF135	-0.29437	143.453
ZNF257	-0.29437	183.005
ZNF460	-0.29437	190.645
ZNF770	-0.29437	178.524
ETV2::FIGLA	-0.2973	156.656
ETV5::FIGLA	-0.2973	162.641
TFAP4::ETV1	-0.2973	153.761
TFAP4::FLI1	-0.2973	156.711
ZNF549	-0.2973	201.028
ZNF93	-0.2973	197.393
SP5	-0.29755	199.169
Smad4	-0.32164	130.291
ZNF667	-0.3265	53.633
IKZF2	-0.32803	97.6243
KLF13	-0.33429	114.238
GCM2	-0.33917	136.313
ASCL1	-0.3509	185.288
Ascl2	-0.3509	182.27
Bhlha15	-0.3509	175.633
BHLHE22	-0.3509	178.886
FERD3L	-0.3509	177.632
MSC	-0.3509	166.275
MYOG	-0.3509	181.856
Neurod2	-0.3509	178.886
NHLH1	-0.3509	183.709
NHLH2	-0.3509	173.057
Olig2	-0.3509	178.886
Tcf12	-0.3509	178.886
Twist2	-0.3509	178.886
KLF1	-0.35251	79.6235
KLF10	-0.35251	163.204
KLF12	-0.35251	190.786
KLF14	-0.35251	166.046
KLF16	-0.35251	181.224
KLF4	-0.35251	102.632
KLF5	-0.35251	110.958
KLF9	-0.35251	50.8258
MAZ	-0.35251	203.303
PATZ1	-0.35251	203.107
SP1	-0.35251	202.575
SP2	-0.35251	203.162
SP3	-0.35251	141.815
SP4	-0.35251	184.445
FIGLA	-0.35304	192.936
MEIS1	-0.35304	200.148
MEIS1	-0.35304	200.148
MYOD1	-0.35304	191.566
PKNOX2	-0.35304	99.6721
SNAI2	-0.35304	197.417
TGIF1	-0.35304	85.905
TGIF2	-0.35304	100.121
TGIF2LX	-0.35304	125.625
TGIF2LY	-0.35304	115.704
USF1	-0.35304	152.103
ZEB1	-0.35304	192.936
ZNF768	-0.35426	169.806
EGR1	-0.35775	168.737
EGR2	-0.35775	163.897
EGR3	-0.35775	178.824
EGR4	-0.35775	184.213
Wt1	-0.35775	207.903
ZNF610	-0.36917	176.226
Plagl1	-0.3702	164.38
ZNF148	-0.37093	208.804
ZBTB14	-0.37585	159.499
MAZ	-0.38212	203.303
PATZ1	-0.38212	203.107
REL	-0.38217	102.773
RELA	-0.38217	94.0843
ZNF766	-0.38217	122.893
ETV5::FOXO1	-0.38338	102.833
NFIA	-0.40136	79.3326
NFIC	-0.40136	85.5421
NFIX	-0.40136	79.3326
RFX1	-0.40136	124.049
RFX2	-0.40136	129.733
RFX3	-0.40136	114.204
RFX5	-0.40136	115.364
Rfx6	-0.40136	79.5927
ZNF547	-0.40136	95.3677
ZNF582	-0.40484	39.403
SP1	-0.40879	202.575
ZFP14	-0.40879	166.885
E2F4	-0.40954	130.453
NFKB1	-0.41537	146.289
NFKB2	-0.41537	142.905
STAT1::STAT2	-0.41856	129.34
ZNF449	-0.4413	142.517
E2F6	-0.45004	179.292
HIC2	-0.45004	127.636
KLF14	-0.45004	166.046
KLF15	-0.45004	179.178
SP1	-0.45004	202.575
SP2	-0.45004	203.162
ZBED4	-0.45004	180.712
ESRRA	-0.46278	202.585
ESRRB	-0.46278	211.596
Nr5A2	-0.46278	203.461
RREB1	-0.46379	152.614
OSR1	-0.4764	114.345
OSR2	-0.4764	152.474
CEBPD	-0.48146	144.344
DUXA	-0.48146	119.856
NR5A1	-0.48146	204.677
Pax7	-0.48146	143.828
ZBTB6	-0.48146	117.876
Sox17	-0.48264	186.446
KLF3	-0.48581	147.56
ZNF610	-0.48581	176.226
MXI1	-0.49251	108.451
NHLH2	-0.49251	173.057
MYBL2	-0.5108	39.1437
Ahr::Arnt	-0.52005	163.537
Atf1	-0.52568	29.5846
FOS::JUND	-0.52568	125.084
FOSL1::JUN	-0.52568	133.631
JUN::JUNB	-0.52568	122.592
TFAP2A	-0.5405	156.51
TFAP2B	-0.5405	146.035
TFAP2C	-0.5405	166.891
TFAP2E	-0.5405	152.094
Zfx	-0.54923	176.719
EWSR1-FLI1	-0.60472	179.209
SP5	-0.61589	199.169
Rfx6	-0.63533	79.5927
MEF2C	-0.64002	147.022
TFAP2A	-0.64955	176.024
TFAP2B	-0.64955	187.19
TFAP2C	-0.64955	172.357
Bcl11B	-0.66411	109.93
GLI3	-0.66411	146.882
KLF9	-0.66411	50.8258
RREB1	-0.66411	152.614
ZFP14	-0.66575	166.885
ZNF343	-0.68867	161.305
ZNF682	-0.71002	179.952
Tfcp2l1	-0.7144	121.495
TCF7L2	-0.71518	188.025
ELF1	-0.71532	111.112
ELF3	-0.71532	154.356
Erg	-0.71532	121.998
GABPA	-0.71532	123.6
Ikzf3	-0.71532	75.7012
SMAD2	-0.7184	127.569
KLF1	-0.72508	79.6235
KLF12	-0.72508	190.786
KLF4	-0.72508	102.632
KLF5	-0.72508	110.958
MAZ	-0.72508	203.303
PATZ1	-0.72508	203.107
SP2	-0.72508	203.162
SP4	-0.72508	184.445
ZNF320	-0.72508	203.442
SP5	-0.74153	199.169
ZNF148	-0.74153	208.804
ZNF281	-0.74153	206.685
DUXA	-0.76251	119.856
KLF17	-0.77739	173.933
ZSCAN4	-0.78318	88.1723
PRDM9	-0.83577	201.914
ZNF574	-0.83684	170.983
FOXH1	-0.85897	148.941
TCF7L1	-0.99862	191.756
TCF7L2	-0.99862	188.025
ZNF454	-1.07276	185.425
MSANTD3	-1.12746	128.912
Mafb	-1.16342	100.698
MAFF	-1.16342	136.103
NRL	-1.16342	104.107
Bach1::Mafk	-1.18162	148.138
HNF4A	-1.18162	139.769
HNF4G	-1.18162	139.774
MEIS1	-1.18162	200.148
REST	-1.18162	157.634
ZNF135	-1.18162	143.453
ZNF460	-1.18162	190.645

## Sheet: Fig.2h
Figure 2h: Relative mRNA expression after 24 hours treatment with all-trans-retinoic acid in the absence of LIF
	control			RA
Lmna	1.00005	1.00142	1.00154	0.534	0.31452	0.412563
Nanog	1	1.00214	1.00012	0.37485	0.251456	0.201475

## Sheet: Fig.2i
Figure 2i: Top 20 KEGG pathways for the genes up regulated in E5.5 vs E3.5 embryos
TermID	Term	Enrichment	logP	Genes in Term	Target Genes in Term	Fraction of Targets in Term	Total Target Genes	Total Genes	Gene Symbols
M00177	Ribosome, eukaryotes	6.31133e-27	-60.3275	90	46	0.0710974	647	7931	Rpl22l1,Rps2,Rpl14,Rps8,Rps7,Rpl19,Rpl11,Rplp1,Rpl31,Rps18,Rpl26,Rpl6,Rpl18a,Rpl35a,Rps19,Rps17,Rps27a,Rpl37a,Rps14,Rplp0,Rpl21,Rpl30,Rps5,Rpl9,Rps11,Rps27l,Rpl36,Rpl36al,Rpl8,Rpsa,Rps15,Rpl27,Rps9,Rps27,Rpl15,Rps28,Rpl38,Fau,Rps23,Rpl18,Rps21,Rpl41,Rpl32,Rpl35,Rps26,Rpl27a
ko03010	Ribosome	2.46492e-22	-49.7547	139	52	0.0803709	647	7931	Rpl6,Rpl35a,Rpl18a,Rps19,Rps17,Mrpl28,Rps14,Rpl37a,Rps27a,Rpl30,Mrpl13,Rps5,Mrpl11,Rpl21,Rplp0,Rps2,Rpl22l1,Rpl19,Rps8,Rpl14,Rps7,Rpl11,Rpl26,Rpl31,Rplp1,Rps18,Rpl38,Rps28,Rpl15,Fau,Rps21,Rpl18,Rps23,Rps26,Rpl27a,Rpl41,Rpl32,Rpl35,Mrpl1,Rps11,Rpl9,Rpl36,Rpl36al,Mrpl20,Rps27l,Rps27,Rps9,Mrpl34,Rpsa,Rpl8,Rpl27,Rps15
ko03040	Spliceosome	1.50446e-12	-27.2226	131	38	0.0587326	647	7931	Sf3b5,Hnrnpa1,Snrpd3,Prpf6,U2af1,Snrpf,Lsm3,Ddx39b,Srsf3,Aqr,Acin1,Phf5a,Snrpg,Rbm25,Bud31,Hnrnpk,Srsf7,Snrpd2,Eftud2,Snrpd1,Srsf10,Prpf40a,Sf3b1,Thoc3,Snrpe,Lsm6,Tra2b,Ncbp1,Sf3a3,U2af2,Prpf38a,Dhx15,Ddx5,Hnrnpu,Srsf1,Ddx46,Lsm4,Sf3b3
ko03030	DNA replication	2.9963e-09	-19.6259	35	16	0.0247295	647	7931	Prim1,Rpa3,Rpa1,Rfc2,Mcm3,Rpa2,Rfc5,Pola2,Rnaseh2a,Mcm7,Pold2,Pold3,Pold1,Ssbp1,Mcm5,Pcna
ko03430	Mismatch repair	2.37266e-08	-17.5567	22	12	0.0185471	647	7931	Pold3,Mlh1,Pold2,Pold1,Ssbp1,Pcna,Rfc5,Rpa2,Rpa1,Exo1,Rpa3,Rfc2
M00352	Spliceosome, U2-snRNP	8.32038e-08	-16.302	20	11	0.0170015	647	7931	Sf3b1,Snrpd3,Snrpf,Snrpe,Snrpg,Sf3b5,Snrpd2,Sf3a3,Sf3b3,Snrpd1,Phf5a
mmu00190	Oxidative phosphorylation	1.68902e-07	-15.5939	118	28	0.0432767	647	7931	Sdhb,Ndufa4,Ndufa2,Ndufb6,Ndufb8,Ndufb2,Ndufc2,Sdhc,Ndufab1,Ndufa11,Ndufa7,Ppa1,Cox5a,Uqcrq,Atp5j2,Cox7a2,Cox6b2,Ndufb7,Atp6v1f,Ndufv3,Sdhd,Ndufa8,Lhpp,Ndufs4,Ppa2,Ndufs6,Uqcrh,Uqcr11
mmu05012	Parkinson's disease	2.46357e-07	-15.2165	127	29	0.0448223	647	7931	Ndufs4,Ndufs6,Uqcrh,Uqcr11,Vdac2,Cyct,Ndufa8,Ubb,Sdhd,Ndufv3,Cox5a,Uqcrq,Cox7a2,Cox6b2,Ndufb7,Ndufb8,Ndufb6,Gnai2,Ndufab1,Sdhc,Ndufb2,Ndufc2,Ndufa7,Casp3,Ndufa11,Park7,Ndufa4,Sdhb,Ndufa2
mmu05016	Huntington's disease	2.7082e-07	-15.1218	179	36	0.0556414	647	7931	Ndufa8,Sod1,Polr2d,Sdhd,Ndufv3,Ndufs4,Polr2c,Uqcrh,Uqcr11,Sin3a,Ndufs6,Cyct,Vdac2,Ndufab1,Sdhc,Ndufb2,Ndufc2,Ndufb8,Ndufb6,Casp3,Ndufa7,Ndufa11,Polr2b,Bax,Ndufa4,Ep300,Sdhb,Polr2f,Polr2h,Ndufa2,Creb1,Uqcrq,Cox5a,Ndufb7,Cox6b2,Cox7a2
ko01230	Biosynthesis of amino acids	5.09907e-07	-14.489	77	21	0.0324575	647	7931	Aldh18a1,Tpi1,Aldh7a1,Mat2b,Tkt,Aldoa,Shmt2,Cbs,Phgdh,Pfkl,Gpt2,Eno3,Got2,Cth,Mat2a,Pkm,Gapdh,Eno1,Bcat2,Pgam1,Pycr1
ko05010	Alzheimer's disease	9.76898e-07	-13.8389	165	33	0.0510046	647	7931	Calm3,Ndufa2,Ndufa4,Sdhb,Casp3,Ndufa7,Ndufa11,Ndufb8,Ndufb6,Ndufab1,Sdhc,Ndufc2,Ndufb2,Cox7a2,Nae1,Ndufb7,Cox6b2,Cox5a,Gapdh,Uqcrq,Sdhd,Ndufv3,Mapk3,Ndufa8,Ppp3cb,Cyct,Calm2,Apoe,Ndufs6,Lrp1,Uqcrh,Uqcr11,Ndufs4
mmu04932	Non-alcoholic fatty liver disease (NAFLD)	1.2462e-06	-13.5954	144	30	0.0463679	647	7931	Ndufv3,Sdhd,Pik3r2,Ndufa8,Pik3cd,Cyct,Uqcr11,Uqcrh,Ndufs6,Ndufs4,Ndufa2,Ndufa4,Sdhb,Casp3,Ndufa7,Ndufa11,Srebf1,Bax,Ndufab1,Atf4,Sdhc,Ndufb2,Ndufc2,Ndufb8,Ndufb6,Cox6b2,Ndufb7,Cox7a2,Uqcrq,Cox5a
ko00270	Cysteine and methionine metabolism	1.87833e-06	-13.1851	46	15	0.0231839	647	7931	Gclc,Mtap,Ldhb,Mdh1,Got2,Cth,Mat2a,Bcat2,Dnmt1,Dnmt3a,Dnmt3b,Mat2b,Cbs,Ldha,Gclm
M00398	Sm core complex	1.87965e-06	-13.1844	7	6	0.00927357	647	7931	Snrpd1,Snrpf,Snrpe,Snrpg,Snrpd2,Snrpd3
mmu00240	Pyrimidine metabolism	3.7974e-06	-12.4812	100	23	0.0355487	647	7931	Polr1e,Pold3,Enpp3,Pold2,Pold1,Tyms,Dctpp1,Pola2,Polr2h,Nme3,Polr3h,Dut,Polr2f,Polr3k,Polr2b,Prim1,Polr3e,Dck,Nme4,Polr2c,Cad,Txnrd1,Polr2d
ko04110	Cell cycle	4.81264e-06	-12.2443	123	26	0.0401855	647	7931	Ywhaq,Anapc13,Smad4,Cdkn1c,Mcm3,Plk1,Ccnb1,Mcm7,Cdc20,Cdk7,Cul1,Ccne1,Ccne2,Atm,Cdk4,Cdc26,Ep300,Anapc11,Bub1,Ccnd1,Orc1,Smc3,Tfdp2,Anapc2,Mcm5,Pcna
ko01200	Carbon metabolism	5.97447e-06	-12.028	117	25	0.0386399	647	7931	Idnk,Aldoa,Sdhc,Eno3,Pgls,Sdhb,Ogdhl,Esd,Pkm,Gapdh,Tkt,Gpi1,Tpi1,Hk2,Pfkl,Sdhd,Phgdh,Gpt2,Shmt2,Mdh1,Got2,Me2,Eno1,Pgam1,Adh5
ko00010	Glycolysis / Gluconeogenesis	1.15056e-05	-11.3727	65	17	0.0262751	647	7931	Ldhb,Adh5,Pgam1,Eno1,Aldh2,Gapdh,Pck2,Pkm,Aldoa,Aldh7a1,Hk2,Tpi1,Gpi1,Eno3,Pfkl,Ldha,Pgm1
M00354	Spliceosome, U4/U6.U5 tri-snRNP	1.26626e-05	-11.2769	30	11	0.0170015	647	7931	Snrpg,Snrpe,Prpf6,Snrpf,Snrpd3,Lsm3,Lsm6,Snrpd2,Snrpd1,Eftud2,Lsm4
						]

## Sheet: Fig.2j
Figure 2j
Motif analysis of the promoters (±2 kb from TSS) of genes upregulated at E5.5 (E3.5 vs E5.5)
	% of Target Sequences with Motif	-logP value
Sp1(Zf)/Promoter/Homer	61.42	16.58
Elk1(ETS)/Hela-Elk1-ChIP-Seq(GSE31477)/Homer	76.06	15.46
c-Myc(bHLH)/LNCAP-cMyc-ChIP-Seq(Unpublished)/Homer	58.37	13.85
Elk4(ETS)/Hela-Elk4-ChIP-Seq(GSE31477)/Homer	77	13.61
YY1(Zf)/Promoter/Homer	17.29	13.11
E2F4(E2F)/K562-E2F4-ChIP-Seq(GSE31477)/Homer	68.23	11.45
E2F7(E2F)/Hela-E2F7-ChIP-Seq(GSE32673)/Homer	28.56	11.34
Sox2(HMG)/mES-Sox2-ChIP-Seq(GSE11431)/Homer	74.49	10.65
E2F6(E2F)/Hela-E2F6-ChIP-Seq(GSE31477)/Homer	70.5	10.37
Ronin(THAP)/ES-Thap11-ChIP-Seq(GSE51522)/Homer	9.62	9.68
E2F1(E2F)/Hela-E2F1-ChIP-Seq(GSE22478)/Homer	45.15	8.77
E2F(E2F)/Hela-CellCycle-Expression/Homer	14.32	8.54
Maz(Zf)/HepG2-Maz-ChIP-Seq(GSE31477)/Homer	95.31	8.49
ZNF711(Zf)/SHSY5Y-ZNF711-ChIP-Seq(GSE20673)/Homer	95.85	8.48
NRF1(NRF)/MCF7-NRF1-ChIP-Seq(Unpublished)/Homer	30.99	8.28
USF1(bHLH)/GM12878-Usf1-ChIP-Seq(GSE32465)/Homer	49.37	8.2
GFY-Staf(?,Zf)/Promoter/Homer	11.89	8.15
bHLHE40(bHLH)/HepG2-BHLHE40-ChIP-Seq(GSE31477)/Homer	38.58	8.14
Zfp281(Zf)/ES-Zfp281-ChIP-Seq(GSE81042)/Homer	49.14	8.06
E2F3(E2F)/MEF-E2F3-ChIP-Seq(GSE71376)/Homer	75.2	7.77
NRF(NRF)/Promoter/Homer	34.74	7.72
ELF1(ETS)/Jurkat-ELF1-ChIP-Seq(SRA014231)/Homer	70.42	7.68
ZFX(Zf)/mES-Zfx-ChIP-Seq(GSE11431)/Homer	87.64	7.61
Max(bHLH)/K562-Max-ChIP-Seq(GSE31477)/Homer	60.02	7.07
ETS(ETS)/Promoter/Homer	52.35	6.5
Egr1(Zf)/K562-Egr1-ChIP-Seq(GSE32465)/Homer	76.37	6.26
Sox15(HMG)/CPA-Sox15-ChIP-Seq(GSE62909)/Homer	80.28	6.18
Sox7(HMG)/ESC-Sox7-ChIP-Seq(GSE133899)/Homer	34.04	6.11
Klf9(Zf)/GBM-Klf9-ChIP-Seq(GSE62211)/Homer	62.91	5.52
KLF1(Zf)/HUDEP2-KLF1-CutnRun(GSE136251)/Homer	88.65	5.41
Sp5(Zf)/mES-Sp5.Flag-ChIP-Seq(GSE72989)/Homer	92.25	5.34
Sox3(HMG)/NPC-Sox3-ChIP-Seq(GSE33059)/Homer	93.35	5.34
Sox17(HMG)/Endoderm-Sox17-ChIP-Seq(GSE61475)/Homer	63.46	5.26
KLF14(Zf)/HEK293-KLF14.GFP-ChIP-Seq(GSE58341)/Homer	97.57	5.19
CRX(Homeobox)/Retina-Crx-ChIP-Seq(GSE20012)/Homer	98.28	5.17
bHLHE41(bHLH)/proB-Bhlhe41-ChIP-Seq(GSE93764)/Homer	85.52	5.12
Sox4(HMG)/proB-Sox4-ChIP-Seq(GSE50066)/Homer	71.44	5.04
NFY(CCAAT)/Promoter/Homer	74.26	4.82
Sox21(HMG)/ESC-SOX21-ChIP-Seq(GSE110505)/Homer	94.76	4.69
n-Myc(bHLH)/mES-nMyc-ChIP-Seq(GSE11431)/Homer	62.36	4.66
Sox10(HMG)/SciaticNerve-Sox3-ChIP-Seq(GSE35132)/Homer	91.31	4.63

## Sheet: Fig.2n
Figure 2n
Fluorescence intensity(a.u.) of CTH and CBS in Lmna+/+ and Lmna-/- embryos
CTH
	Lmna+/+								Lmna-/-
ICM	2.5	8.5	5.2	7	9.6	5.86	4.61		21.2	19.7	22.8	22.9	14.7
TE	3.13	12	6.3	9.4	12.3	14.69	14.27		19.1	23.6	18.3	19.7	16.6
CBS
	Lmna+/+								Lmna-/-
ICM	24.5	29.8	6.08	19.11	42	31.9	25.3	36.8	88.7	78.1	51.43
TE	14.5	22.1	7.8	22.14	29.5	22.4	36.2	48.3	54.9	41.6	69.75
