# Supplementary material for: Lamin A/C-regulated cysteine catabolic flux modulates stem cell fate through epigenome reprogramming
Source: Springer Nature journal article supplement (doi:10.1038/s42255-025-01443-2), 2026-01-28
Supplement: MOESM12 [file 42255_2025_1443_MOESM12_ESM.xlsx]

## Sheet: Fig.3b
Figure 3b: The abundance of 13C-labelled cysteine, pyruvate, acetyl-CoA and glutathione in 13C3-L-Cysteine flux assay using Lmna+/+ and Lmna-/- mESCs
% contribution from 13C3-Cysteine
	[13C3] L-Cysteine
	Control			Lmna-/-
Unlabelled	0.341579	0.312602	0.3665	0.280653	0.253	0.292729
3h Labeled	64.9666	62.2051	55.6566	95.5	96.1442	100.252
	[13C3] Pyruvate
	Control			Lmna-/-
Unlabelled	0	0	0	0	0	0
3h Labeled	0.302789	3.53772	0	17.6961	13.0913	10.3392
	[13C2] Acetyl CoA
	Control			Lmna-/-
Unlabelled	0	0	0	0	0	0
3h Labeled	0.306834	0.353578	0.371084	7.49875	6.33256	6.13657
	[13C3] Glutathione
	Control			Lmna-/-
Unlabelled	0	0	0	0	0	0
3h Labeled	34.586	32.3793	30.4041	28.8965	29.9983	31.3964

## Sheet: Fig.3c
Figure 3c: Enrichment of 13C₃-L-cysteine derived carbon in acetylated histone sites, as well as the distribution of global histone acetylation in wild-type (WT) mESCs, presented as area under the curve (AUC) per milligram of total protein
Enrichment of 13C₃-L-cysteine derived carbon in acetylated histone sites, expressed as area under the curve (AUC) per milligram of total protein							The distribution of global histone acetylation in wild-type (WT) mESCs, expressed as area under the curve (AUC) per milligram of total protein
	Lmna+/+			Lmna-/-
H3K9ac	0	0	0	1760000	1540000	1120000	H3K9ac	99000000000	108000000000	192000000000
H3K14ac	0	0	0	0	0	0	H3K14ac	106000000000	134000000000	222000000000
H3K23ac	0	0	0	0	0	0	H3K23ac	326000000000	350000000000	603000000000
H3K18ac	50900000	15000000	54200000	0	0	0	H3K18ac	33900000000	31300000000	66800000000
H3K27ac	18900	0	0	58900000	56600000	90500000	H3K27ac	3780000000	3120000000	11900000000
H4K5ac	0	0	0	0	0	0	H4K5ac	335000000000	386000000000	587000000000
H4K8ac	0	0	0	0	0	30600000	H4K8ac	93700000000	99200000000	201000000000
H4K12ac	0	0	0	105000000	82600000	42100000	H4K12ac	19800000000	17000000000	31200000000
H4K16ac	16100000	102000000	55700000	117000000	157000000	1010000	H4K16ac	3470000000	2810000000	8190000000
H2(A/B)K5ac	0	0	0	0	0	0	H2(A/B)K5ac	59800000000	53700000000	149000000000
H2BK9ac	3860000	56500000	95000000	125000000	45000000	60900000	H2BK9ac	154000000	13000000	117000000
H2BK12ac	0	0	0	23800000	116000000	49100000	H2BK12ac	561000000	936000000	1380000000
H2AK13ac	0	0	0	0	0	0	H2AK13ac	486000000000	499000000000	737000000000
H2(A/B)K15ac	128000000	254000000	326000000	531000000	412000000	229000000	H2(A/B)K15ac	22100000	46500000	107000000

## Sheet: Fig.3e
Figure 3e: The relative fold changes of protein levels
	shCtrl WT			shCtrl Lmna-/-			shCbs Lmna-/-			shCth Lmna-/-
H3K9ac	1	1	1	1.94512	2.32464	1.94962	1.03474	1.46107	1.37622	0.658167	0.756899	1.06783
H3K27ac	1	1	1	3.02095	2.57423	1.80165	1.64334	1.12325	1.22118	1.6239	0.9661	1.00298
Pan H3ac	1	1	1	2.35638	2.32464	2.35638	1.17149	1.24948	1.22395	0.60268	0.695961	0.682995
	Control			CBS OE			CTH OE
H3K9ac	1	1	1	5.74485	3.20429	4.26564	5.59289	3.83438	4.91148
H3K27ac	1	1	1	3.94793	3.28307	3.82772	2.04788	2.01679	2.52701
Pan H3ac	1	1	1	4.76693	5.71452	4.0961	3.03282	3.48614	2.66772

## Sheet: Fig.3j
Figure 3j: The relative fold changes of protein levels
	KOSR+LIF			FCS+LIF			BMP4+LIF			Activin + bFGF
H3K9ac	1	1	1	0.98163	0.971998	0.964566	2.71521	2.23307	2.19914	2.37616	2.94807	2.52757
H3K27ac	1	1	1	1.26065	1.52858	1.35413	1.80642	1.59689	1.76521	1.796	1.45015	1.82145
H3K56ac	1	1	1	1.26	1.59579	1.38981	1.19815	1.68001	1.13908	1.12247	1.3359	1.31632
