# Supplementary material for: Lamin A/C-regulated cysteine catabolic flux modulates stem cell fate through epigenome reprogramming
Source: Springer Nature journal article supplement (doi:10.1038/s42255-025-01443-2), 2026-01-28
Supplement: MOESM14 [file 42255_2025_1443_MOESM14_ESM.xlsx]

## Sheet: Fig.4j
Figure 4j
AREA	HM_DE	.y.	group1	group2	n1	n2	statistic	p	p.adj	p.adj.signif	psig005	y.position	groups	xmin
01nLADs	H3K27ac_01GAIN	log2freq	aHIC_LA_Ctr	bHIC_LA_KO	43	43	574.5	0.00251	0.01188	*	*	10.4567	aHIC_LA_Ctr, bHIC_LA_KO
02onLADs	H3K27ac_01GAIN	log2freq	aHIC_LA_Ctr	bHIC_LA_KO	13	16	66.5	0.104	0.178286	ns		8.14172	aHIC_LA_Ctr, bHIC_LA_KO
01nLADs	H3K27ac_02LOSS	log2freq	aHIC_LA_Ctr	bHIC_LA_KO	134	78	6358.5	0.00828	0.02484	*	*	7.62272	aHIC_LA_Ctr, bHIC_LA_KO
02onLADs	H3K27ac_02LOSS	log2freq	aHIC_LA_Ctr	bHIC_LA_KO	37	20	376.5	0.919	0.919	ns		8.03772	aHIC_LA_Ctr, bHIC_LA_KO
01nLADs	H3K9ac_01GAIN	log2freq	aHIC_LA_Ctr	bHIC_LA_KO	90	72	2359.5	0.00297	0.01188	*	*	10.1347	aHIC_LA_Ctr, bHIC_LA_KO
02onLADs	H3K9ac_01GAIN	log2freq	aHIC_LA_Ctr	bHIC_LA_KO	22	26	190	0.0467	0.0934	ns	*	8.14172	aHIC_LA_Ctr, bHIC_LA_KO
01nLADs	H3K9ac_02LOSS	log2freq	aHIC_LA_Ctr	bHIC_LA_KO	236	123	17700	0.000593	0.007116	**	*	7.67372	aHIC_LA_Ctr, bHIC_LA_KO
02onLADs	H3K9ac_02LOSS	log2freq	aHIC_LA_Ctr	bHIC_LA_KO	58	29	896.5	0.616	0.691636	ns		7.45772	aHIC_LA_Ctr, bHIC_LA_KO
01nLADs	iATA_01GAIN	log2freq	aHIC_LA_Ctr	bHIC_LA_KO	85	76	2524.5	0.0169	0.04056	*	*	12.5927	aHIC_LA_Ctr, bHIC_LA_KO
02onLADs	iATA_01GAIN	log2freq	aHIC_LA_Ctr	bHIC_LA_KO	28	37	406	0.139	0.2085	ns		9.72072	aHIC_LA_Ctr, bHIC_LA_KO
01nLADs	iATA_02LOSS	log2freq	aHIC_LA_Ctr	bHIC_LA_KO	69	39	1509.5	0.294	0.392	ns		7.66172	aHIC_LA_Ctr, bHIC_LA_KO
02onLADs	iATA_02LOSS	log2freq	aHIC_LA_Ctr	bHIC_LA_KO	16	10	89.5	0.634	0.691636	ns		7.45772	aHIC_LA_Ctr, bHIC_LA_KO
