# Supplementary material for: Lamin A/C-regulated cysteine catabolic flux modulates stem cell fate through epigenome reprogramming
Source: Springer Nature journal article supplement (doi:10.1038/s42255-025-01443-2), 2026-01-28
Supplement: MOESM15 [file 42255_2025_1443_MOESM15_ESM.xlsx]

## Sheet: Fig.5b
Figure 5b
Relative mRNA expression
	Control			CBS OE			CTH OE
Mesp1	1.00088	0.999123	1.03652	2.17861	2.46391	2.2862	3.1238	4.87053	3.84446
Mesp2	0.837831	1.19356	1.04526	2.4952	2.09947	1.963	2.64082	3.29939	1.71475

## Sheet: Fig.5c
Figure 5c
Relative mRNA expression
	Control			CBS OE			CTH OE
Mlc2v	0.89	1.12	1.03652	1.43	1.5	2.36	2.55	2.46	4.26
Tnnt2	0.95	1.06	1.04526	2.35	1.65	1.93	2.54	2.72	1.98
Ttn	1	1	1.09652	1.65	1.68	2.14	3.34	3.49	3.54

## Sheet: Fig.5d
Figure 5d
Relative mRNA expression
	200uM Cys			100uM Cys			50uM Cys
Brachyury	1.07515	0.930105	1.01245	0.516495	0.540927	0.4251	0.287016	0.37167	0.3147
Eomes	1.10877	0.901902	1.03124	0.473736	0.531944	0.417374	0.597946	0.386372	0.2512
Mesp1	1.10877	0.901902	1.08421	0.772276	0.602652	0.6125	0.363444	0.458071	0.4019

## Sheet: Fig.5e
Figure 5e
% of CM in Day10 EBs
200μM	100μM	50μM
1.4	0.24	0.14
1.3	0.38	0.19
1.5	0.27	0.16

## Sheet: Fig.5f
Figure 5f
Relative mRNA expression
	shCtrl WT				shCtrl Lmna-/-				shCbs Lmna-/-				shCth Lmna-/-
Mlc2a	1.01011	0.989993	0.983329	1.01695	4.36316	3.84289	6.96122	5.89236	4.48951	4.75706	4.15939	4.46435	1.29914	0.736967	1.11144	1.45091
Tnnt2	1.032	0.968989	1.04596	0.956063	3.09912	3.20707	3.05068	3.03167	1.61139	1.84031	1.73097	1.67516	0.405977	0.372006	0.83763	0.972273
Ttn	0.97	1.03	0.977344	1.02318	5.88	5.87	4.07116	3.66346	3.57	3.85	2.64946	1.54978	0.33	0.33	0.631025	0.441835

## Sheet: Fig.5g
Figure 5g
Relative mRNA expression
	Control			Lmna -/-			Lmna -/-+100uM AOAA(transient)
Mlc2a	1.01	0.99	1.001	3.7	3.56	2.448	1.68	1.77	1.89
Mlc2v	0.97	1.03	1.002	2.99	2.72	3.392	1.37	1.015	1.06

## Sheet: Fig.5i
Figure 5i: Cell number and Percentage in each clusters
cluster	Anotation	plko_ct	pLKO_Lmna_KO	Cth_KD_Lmna_KO	plko_ct_pre	pLKO_Lmna_KO_pre	Cth_KD_Lmna_KO_pre
0	FB	944	415	203	0.173657	0.146178	0.0958451
1	SMC	857	229	286	0.157653	0.0806622	0.135033
2	ESC-like	302	491	428	0.0555556	0.172948	0.202077
3	Hep	510	464	206	0.093819	0.163438	0.0972616
4	Ery	738	81	128	0.135762	0.0285312	0.0604344
5	Epiblast-like	307	262	195	0.0564753	0.092286	0.092068
6	LBM	525	133	77	0.0965784	0.0468475	0.0363551
7	MES	316	186	224	0.058131	0.065516	0.10576
8	EC	333	150	72	0.0612583	0.0528355	0.0339943
9	NPC	209	202	95	0.0384474	0.0711518	0.0448536
10	EXE-like	206	75	163	0.0378955	0.0264178	0.0769594
11	CM	47	79	13	0.00864606	0.0278267	0.00613787
12	Mono/MΦ	89	17	2	0.0163723	0.00598802	0.000944287
13	Ep	19	44	18	0.00349522	0.0154984	0.00849858
14	Neuron	34	11	8	0.0062546	0.0038746	0.00377715

## Sheet: Fig.5k
Figure 5k
Relative mRNA expression
	pLKO control			Cbs/Cth KD
Eomes	1.02	0.98	1.01	0.66	0.65	0.46
Brachyury	0.94	1.07	1.12	0.15	0.16	0.25
Mesp1	1.06	0.94	0.98	0.22	0.19	0.04
AFP	1.1	0.91	1.01	0.46	0.39	0.26
Foxa2	1.12	0.89	1.18	0.7	0.67	0.27
Synapt	1.11	0.9	0.97	0.7	0.69	0.86
Th	0.83	1.21	0.98	0.71	1.02	0.86

## Sheet: Fig.5l
Figure 5l
Relative mRNA expression
	pLKO control			Cbs/Cth KD
Mlc2a	1.069	0.901	1.109	0.659	0.623	0.614
Mlc2v	1.047	1.068	0.936	0.061	0.054	0.051
TnnT2	1.074	1.032	0.969	0.345	0.289	0.296

## Sheet: Fig.5m
Figure 5m
Relative mRNA expression
	Control			LmnaG609G/G609G			CTH LmnaG609G/G609G			CBS LmnaG609G/G609G
Brachyury	1	1	1.04	0.19	0.41	0.39	1.67	1.62	1.83	1.72035	1.26718	1.12259
Eomes	0.98	1.02	0.96	0.371	0.23	0.21	1.08	1.05	1.14	2.03698	1.76695	2.25
Mesp1	0.83	1.21	1.01	0.25	0.17	0.37	4.3	4.03	4.39	2.37268	2.93276	2.1274
Foxa2	0.9	0.88	1.2	0.22	0.27	0.28	0.96	0.85	0.79	1.24	1.05	1.01
Sox17	1.03	0.7	1.36	0.46	0.35	0.42	1.27	1.11	1.12	2.92	2.69	2.6

[truncated: 2 more sheets: Fig.5n, Fig.5q]
