# Supplementary material for: Lamin A/C-regulated cysteine catabolic flux modulates stem cell fate through epigenome reprogramming
Source: Springer Nature journal article supplement (doi:10.1038/s42255-025-01443-2), 2026-01-28
Supplement: MOESM17 [file 42255_2025_1443_MOESM17_ESM.xlsx]

## Sheet: Fig.6b
Figure 6b
% of binucleated CM from sorted CM of D14 EBs
shControl WT	shControl Lmna-/-	shCbs Lmna-/-	shCth Lmna-/-
5.9	35.6	1.2	2.1
4.2	37.1	3.7	1.6
6.1	32.1	2.4	1.1

## Sheet: Fig.6d
Figure 6d
	shControl WT	shControl Lmna-/-	shCbs Lmna-/-	shCth Lmna-/-
Normal beating	25	5	23	23
Proarrythmic beating	2	22	10	16

## Sheet: Fig.6f
Figure 6f
% of cells from Nkx2-5 positive CMs
	shControl WT			shControl Lmna-/-			shCbs Lmna-/-			shCth Lmna-/-
Apoptotic	3.2	1.8	1.2	21.2	24.6	16.2	4.2	8.4	10.8	4.4	4.9	7.1
Necrotic	5.9	2.5	3.7	29.6	23.8	27.5	11	12.5	13.7	7.6	8.4	10.4

## Sheet: Fig.6h
Figure 6h
% of H2Ax postive cells
shControl WT	shControl Lmna-/-	shCbs Lmna-/-	shCth Lmna-/-	CBS OE	CTH OE
15	72	57.14	22.58	71.43	90
18.18	85.71	66.67	34.38	71.43	75
25	70.97	27.78	60	70	100
26.67	66.67	30.77	23.53	88.24	88.89
25	77.27	47.06	12.9	94.62	100
23.53	54.05	35.29	31.25	98.77	71.26
