# Supplementary material for: Lamin A/C-regulated cysteine catabolic flux modulates stem cell fate through epigenome reprogramming
Source: Springer Nature journal article supplement (doi:10.1038/s42255-025-01443-2), 2026-01-28
Supplement: MOESM18 [file 42255_2025_1443_MOESM18_ESM.xlsx]

## Sheet: Fig.7b
Figure 7b
SAM levels (nM/mg)
shCtrl WT	shCtrl Lmna-/-	shCbs Lmna-/-	Lmna G609G/G609G	CBS OE-Lmna G609G/G609G	CBS OE	shCbs WT
67.8098	39.2056	74.9621	105.786	48.4548	48.1377	101.873
62.5482	35.3022	92.5803	140.335	69.149	42.8643	132.795
79.1533	41.3766	70.8185	123.768	62.9258	44.7189	148.641
64.8542	30.1598	85.1422	132.148	70.8943	31.4751	123.854
