# Supplementary material for: Lamin A/C-regulated cysteine catabolic flux modulates stem cell fate through epigenome reprogramming
Source: Springer Nature journal article supplement (doi:10.1038/s42255-025-01443-2), 2026-01-28

Full unedited blots for Fig. 7c

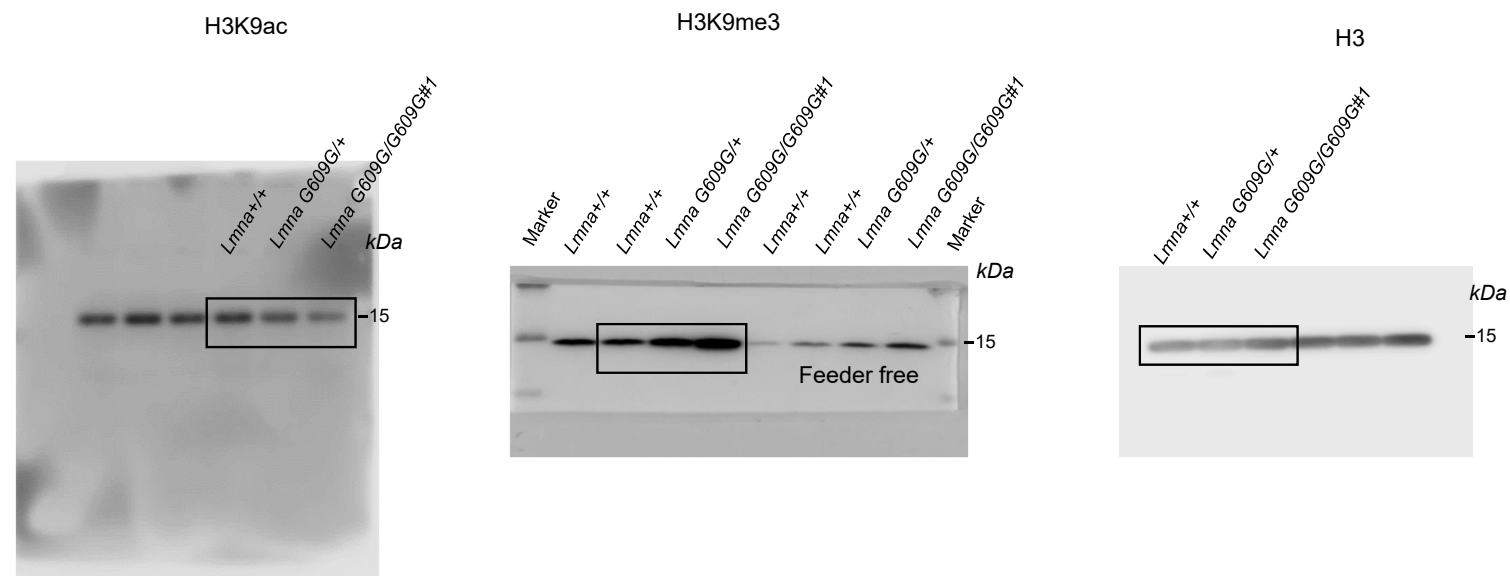

Full unedited blots for Fig. 7d

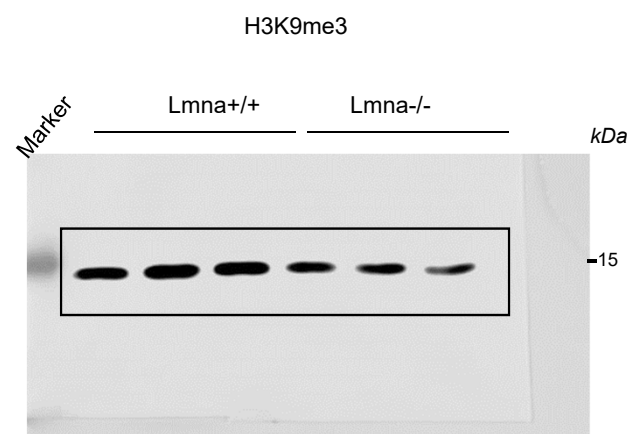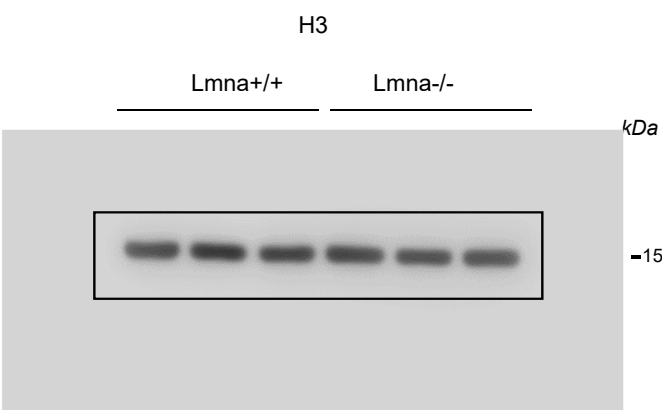

Full unedited blots for Fig 7e

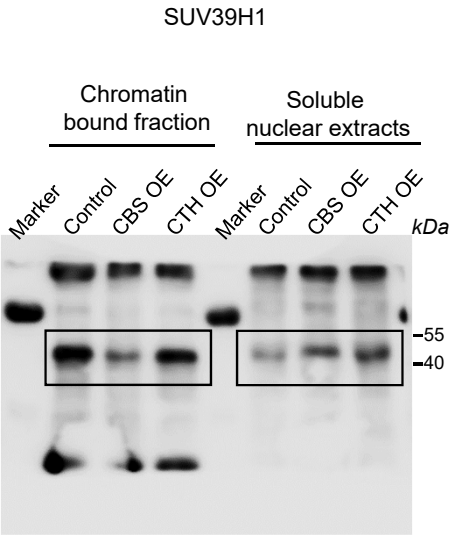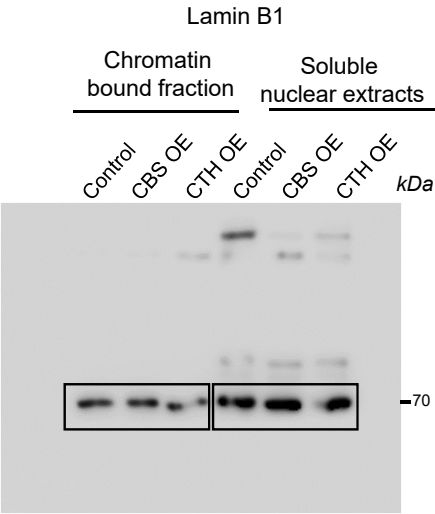

Full unedited blots for Fig 7f

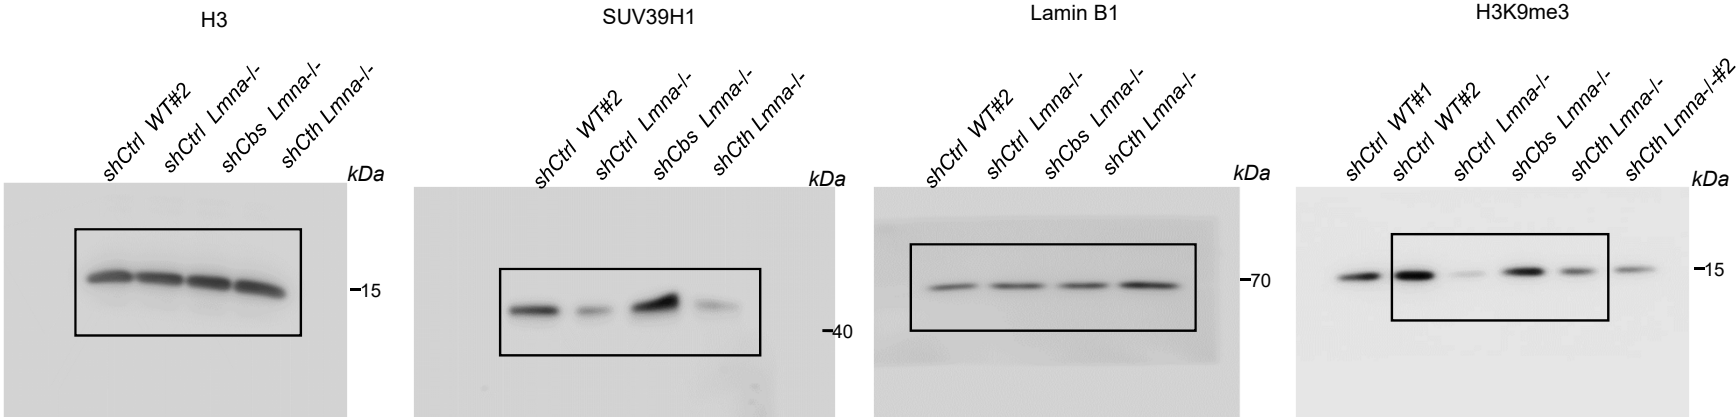

Full unedited blots Fig. 7g

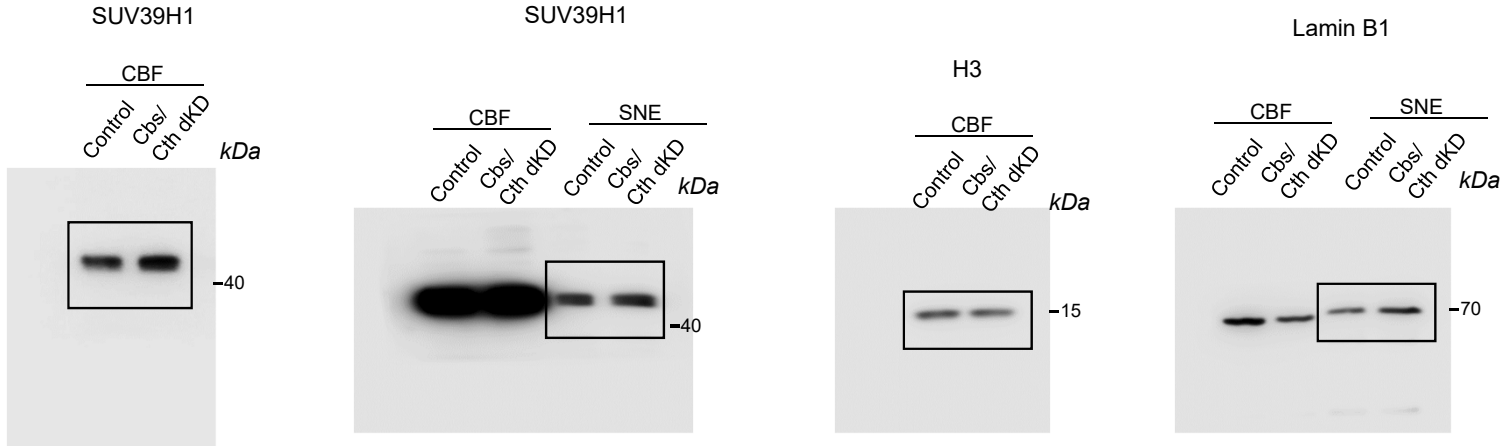

Full unedited blots for Fig. 7h

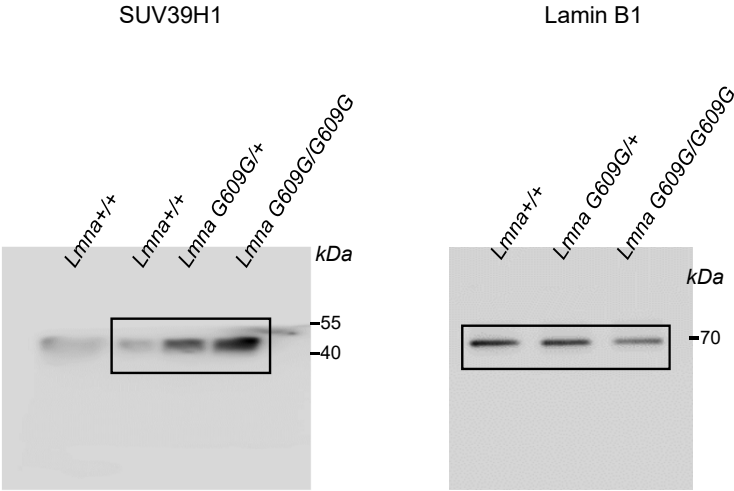

Full unedited blots for Fig. 7i

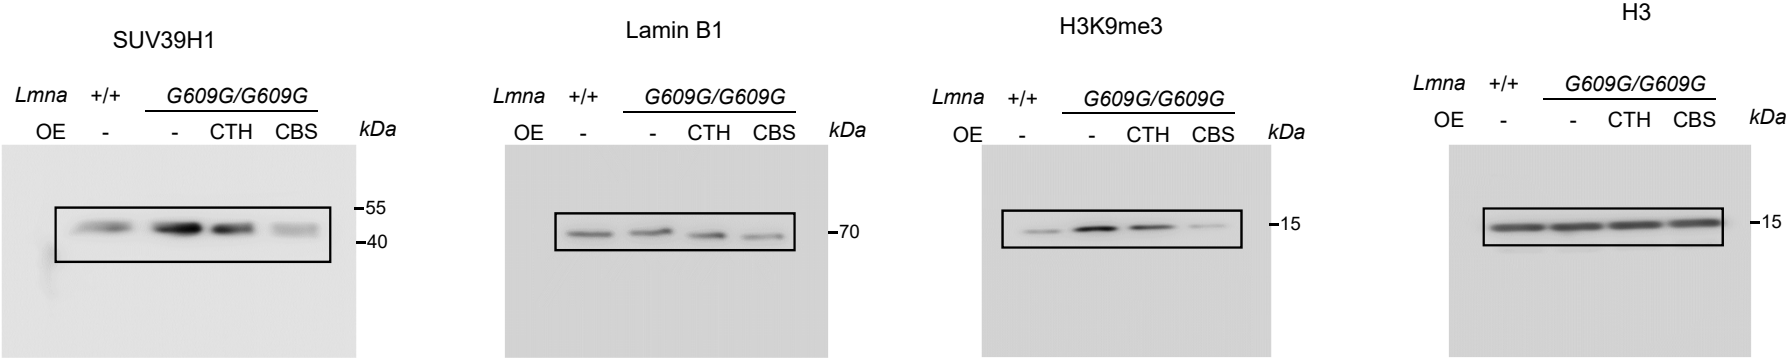

Full unedited blots for Fig. 7j

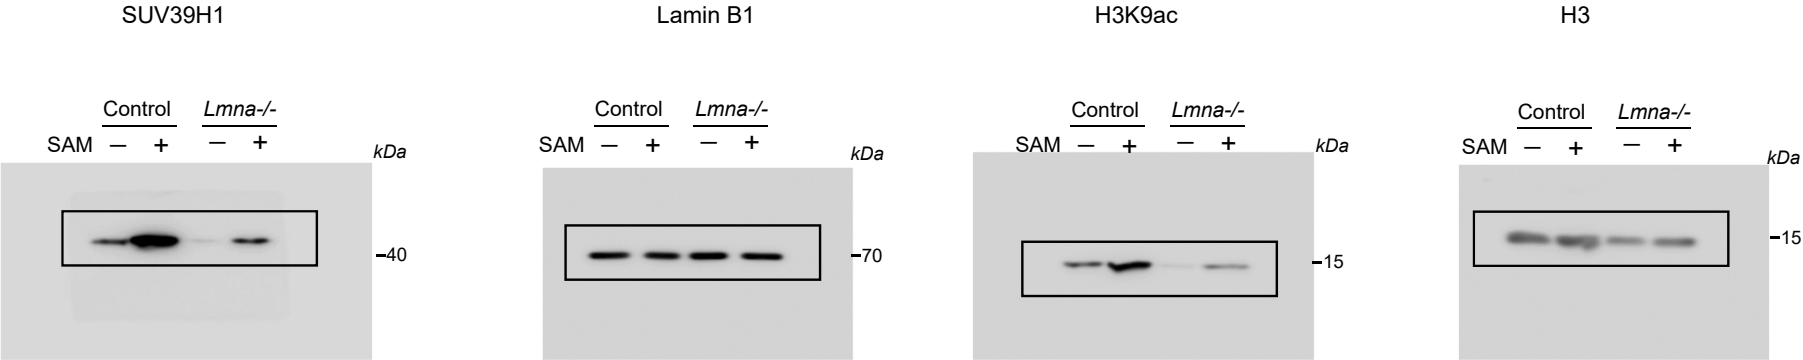

Supplement: MOESM19 [file 42255_2025_1443_MOESM19_ESM.pdf › 42255_2025_1443_MOESM19_ESM.pdf]
