# Supplementary material for: Lamin A/C-regulated cysteine catabolic flux modulates stem cell fate through epigenome reprogramming
Source: Springer Nature journal article supplement (doi:10.1038/s42255-025-01443-2), 2026-01-28
Supplement: MOESM20 [file 42255_2025_1443_MOESM20_ESM.xlsx]

## Sheet: Fig.8b
Figure 8b
% of gama-H2Ax positive cells
	Control			G55			CBSOE-G55
Without treatment	0	0	0	11.76	15.79	27.27	3.85	0	9.09
0h after H2O2 treatment	85.19	100	92.86	100	96.77	96.67	95	83.33	86.67
1h after H2O2 treatment	83.33	86.49	89.29	94.12	97.14	94.44	84	88.24	87.88
4h after H2O2 treatment	72	65	68.42	88.46	91.43	89.36	61.9	54.55	66.67

## Sheet: Fig.8e
Figure 8e
% of SPIDER SA β-gal+ cells
	Control			Lmna G609G/+			CBS OE Lmna G609G/G609G
untreat	2.91	3.31	3.44	6.9	7.26	7.64	1.95	1.92	2.14
H2O2	8.96	10.09	9.5	19.49	20.78	21.69	12.85	14.35	13.89

## Sheet: Fig.8f
Figure 8f
Mean MitoSOX green fluorescence
Control	Lmna G609G/G609G	Cbs OE-Lmna G609G/G609G
3500	5787	3041
3479	5881	2400
3537	6314	2671

## Sheet: Fig.8g
Figure 8g: GO analysis of genes upregulated in Lmna G609G/G609G compared to control mESCs with genes downregulated in CBS OE-Lmna G609G/G609G compared to Lmna G609G/G609G mESCs. p-adjusted value<0.05.
Category	Term	Count	%	PValue	Genes	List Total	Pop Hits	Pop Total	Fold Enrichment	Bonferroni	Benjamini	FDR
GOTERM_BP_DIRECT	GO:0006413~translational initiation	5	6.32911	9.91027e-06	EIF1AD3, EIF1AD4, EIF1AD7, EIF1AD8, EIF1AD15	66	61	29712	36.9001	0.00538656	0.0054011	0.00532181
GOTERM_BP_DIRECT	GO:0002474~antigen processing and presentation of peptide antigen via MHC class I	4	5.06329	2.81511e-05	H2-K1, H2-L, B2M, H2-D1	66	27	29712	66.6936	0.0152255	0.00767118	0.00755858
GOTERM_BP_DIRECT	GO:0010833~telomere maintenance via telomere lengthening	3	3.79747	0.000167976	ZSCAN4D, ZSCAN4C, ZSCAN4F	66	9	29712	150.061	0.0874887	0.0305157	0.0300678
GOTERM_BP_DIRECT	GO:0001916~positive regulation of T cell mediated cytotoxicity	4	5.06329	0.000268718	H2-K1, H2-L, B2M, H2-D1	66	57	29712	31.5917	0.136249	0.0366129	0.0360755
GOTERM_BP_DIRECT	GO:0006955~immune response	7	8.86076	0.00057602	CCL7, H2-K1, H2-L, CCL2, B2M, H2-D1, CX3CL1	66	471	29712	6.6906	0.269496	0.0627861	0.0618645
GOTERM_BP_DIRECT	GO:0048245~eosinophil chemotaxis	3	3.79747	0.000872877	CCL7, CCL2, CX3CL1	66	20	29712	67.5273	0.37869	0.0792864	0.0781225
GOTERM_BP_DIRECT	GO:0001913~T cell mediated cytotoxicity	3	3.79747	0.0011574	H2-K1, B2M, H2-D1	66	23	29712	58.7194	0.468019	0.0901116	0.0887889
GOTERM_BP_DIRECT	GO:0043410~positive regulation of MAPK cascade	5	6.32911	0.00136769	ADRB3, IGFBP4, CX3CL1, FGFR1, GADD45G	66	219	29712	10.2781	0.525693	0.0931737	0.091806
GOTERM_BP_DIRECT	GO:0030334~regulation of cell migration	4	5.06329	0.00239411	CAMSAP3, USP17LE, MMP3, RHOB	66	121	29712	14.882	0.729195	0.144977	0.142849
GOTERM_BP_DIRECT	GO:0002486~antigen processing and presentation of endogenous peptide antigen via MHC class I via ER pathway, TAP-independent	3	3.79747	0.00348384	H2-K1, H2-L, H2-D1	66	40	29712	33.7636	0.850731	0.172608	0.170075
GOTERM_BP_DIRECT	GO:0002476~antigen processing and presentation of endogenous peptide antigen via MHC class Ib	3	3.79747	0.00348384	H2-K1, H2-L, H2-D1	66	40	29712	33.7636	0.850731	0.172608	0.170075
GOTERM_BP_DIRECT	GO:0061844~antimicrobial humoral immune response mediated by antimicrobial peptide	4	5.06329	0.0041416	CCL7, CCL2, B2M, CX3CL1	66	147	29712	12.2498	0.895844	0.188098	0.185337
GOTERM_BP_DIRECT	GO:0070098~chemokine-mediated signaling pathway	3	3.79747	0.00649438	CCL7, CCL2, CX3CL1	66	55	29712	24.5554	0.971304	0.272265	0.268268
GOTERM_BP_DIRECT	GO:0002485~antigen processing and presentation of endogenous peptide antigen via MHC class I via ER pathway, TAP-dependent	2	2.53165	0.00872244	H2-K1, H2-D1	66	4	29712	225.091	0.991558	0.339552	0.334568
GOTERM_BP_DIRECT	GO:0010977~negative regulation of neuron projection development	3	3.79747	0.017029	H2-K1, B2M, H2-D1	66	91	29712	14.8412	0.999914	0.618719	0.609637
GOTERM_BP_DIRECT	GO:0048247~lymphocyte chemotaxis	2	2.53165	0.0195202	CCL2, CX3CL1	66	9	29712	100.04	0.999978	0.664907	0.655147
GOTERM_BP_DIRECT	GO:0030335~positive regulation of cell migration	4	5.06329	0.021025	CCL7, MMP3, CCL2, CX3CL1	66	268	29712	6.71913	0.999991	0.674035	0.664141
GOTERM_BP_DIRECT	GO:0001525~angiogenesis	4	5.06329	0.0253255	ANXA2, CCL2, FGFR1, RHOB	66	288	29712	6.25253	0.999999	0.766799	0.755543
GOTERM_BP_DIRECT	GO:2000774~positive regulation of cellular senescence	2	2.53165	0.0302021	ARG2, B2M	66	14	29712	64.3117	1	0.866325	0.853608
GOTERM_BP_DIRECT	GO:0048246~macrophage chemotaxis	2	2.53165	0.0386651	CCL2, CX3CL1	66	18	29712	50.0202	1	1	0.987132
GOTERM_BP_DIRECT	GO:0006941~striated muscle contraction	2	2.53165	0.0386651	ARG2, CACNA1S	66	18	29712	50.0202	1	1	0.987132
GOTERM_BP_DIRECT	GO:0030031~cell projection assembly	2	2.53165	0.0428693	CAPG, FGFR1	66	20	29712	45.0182	1	1	0.987132
GOTERM_BP_DIRECT	GO:0002523~leukocyte migration involved in inflammatory response	2	2.53165	0.0449646	CCL2, CX3CL1	66	21	29712	42.8745	1	1	0.987132
GOTERM_BP_DIRECT	GO:0010759~positive regulation of macrophage chemotaxis	2	2.53165	0.0533007	CCL2, CX3CL1	66	25	29712	36.0145	1	1	0.987132
GOTERM_BP_DIRECT	GO:0006446~regulation of translational initiation	2	2.53165	0.0553735	IMPACT, EIF4EBP1	66	26	29712	34.6294	1	1	0.987132
GOTERM_BP_DIRECT	GO:0043065~positive regulation of apoptotic process	4	5.06329	0.0570513	FAM162A, PHLDA3, GADD45G, RHOB	66	399	29712	4.5131	1	1	0.987132
GOTERM_BP_DIRECT	GO:0030198~extracellular matrix organization	3	3.79747	0.0603836	MMP13, COL5A3, MMP3	66	182	29712	7.42058	1	1	0.987132
GOTERM_BP_DIRECT	GO:0042127~regulation of cell population proliferation	3	3.79747	0.0639129	USP17LE, JUND, FGFR1	66	188	29712	7.18375	1	1	0.987132
GOTERM_BP_DIRECT	GO:0010332~response to gamma radiation	2	2.53165	0.0677168	CCL7, CCL2	66	32	29712	28.1364	1	1	0.987132
GOTERM_BP_DIRECT	GO:0006826~iron ion transport	2	2.53165	0.0697586	FTL1, B2M	66	33	29712	27.2837	1	1	0.987132
GOTERM_BP_DIRECT	GO:0050918~positive chemotaxis	2	2.53165	0.0717959	CCL2, CX3CL1	66	34	29712	26.4813	1	1	0.987132
GOTERM_BP_DIRECT	GO:0030574~collagen catabolic process	2	2.53165	0.0758574	MMP13, MMP3	66	36	29712	25.0101	1	1	0.987132
GOTERM_BP_DIRECT	GO:0050870~positive regulation of T cell activation	2	2.53165	0.0819168	CCL2, B2M	66	39	29712	23.0862	1	1	0.987132
GOTERM_BP_DIRECT	GO:0007129~homologous chromosome pairing at meiosis	2	2.53165	0.0899352	ZCWPW1, GCNA	66	43	29712	20.9387	1	1	0.987132
GOTERM_BP_DIRECT	GO:0071549~cellular response to dexamethasone stimulus	2	2.53165	0.0998613	EIF4EBP1, CCL2	66	48	29712	18.7576	1	1	0.987132

## Sheet: Fig.8i
Figure 8i
Relative mRNA expression
Cbs		Cth		Lmna all transcripts		Progerin
Young	Old	Young	Old	Young	Old	Young	Old
0.842899	0.975665	0.80702	1.76045	0.948053	2.12182	0.72	1.9
1.29224	0.419792	1.34867	0.88472	1.23053	1.09887	1.25	1.31
0.928037	0.450028	0.944277	0.734574	0.754724	0.786942	0.86	1.96
0.967062	0.474499	1.00547	1.52689	1.11308	0.94433	0.99	2.53
0.876091	0.589751	0.618317	0.817796	1.2545	1.27679	0.79	1.61
1.34212	0.503269	0.755685	0.738993	0.971654	1.27516	1.02	1.21
1.0643	0.507858	0.858356	0.814625	0.905783	0.880155	0.83	2.44

## Sheet: Fig.8l
Figure 8 l
Relative H3K9me3 level
3-month	24-month
1.24415	1.70812
0.967983	1.94701
0.787866	1.23169
1.39273	1.81685
0.590942	1.31958
1.01633	0.871631
1.45669	3.01212

## Sheet: Fig.8m
Figure 8m
RelativeSAM/SAH level
Lmna+/+ CD	G609G/G609G CD	G609G/G609G MR
0.747083	1.78057	1.07575
0.648573	1.99355	1.15376
1.37206	2.59249	1.00789
1.23229	2.2028	1.22888

## Sheet: Fig.8n
Figure 8n
CBS and CTH expression in young and old individuals (FPKM)
CBS		CTH
Young	Old	Young	Old
3.348	8.032	1.017	1.286
5.742	8.127	0.513	0.925
18.335	3.055	1.902	1.152
18.456	4.459	1.791	0.546
7.618	12.478	1.076	0.834
0.829	3.5	0.283	0.616
12.689	2.248	1.187	0.895
21.002	8.3	1.281	1.22
13.351	7.927	1.522	0.569
6.312	9.856	0.877	1.332
3.974	4.764	0.737	0.243
4.836	3.555	0.561	0.795
14.379	3.941	0.611	0.562
4.911	1.621	0.781	0.593
4.894	16.733	0.48	0.889
3.658	0.822	0.561	0.322
9.009	6.515	0.53	0.567
10.718	1.477	2.035	0.385
3.949	7.974	0.972	0.497
1.712	2.21	0.619	0.674
5.693	10.956	1.093	1.495
3.304	3.469	0.695	1.17
8.285	2.522	1.608	0.845
2.513	7.6	0.49	1.13
6.079	11.697	0.415	1.3
12.664	10.493	1.194	0.472
16.107	2.635	0.732	1.132
27.654	12.706	1.475	0.705
4.075	7.664	0.716	1.755
8.602	2.504	1.824	0.87
10.537	6.844	0.809	0.953
10.195	4.297	0.492	1.732
6.562	3.262	1.451	1.138
5.657		0.739
19.791		2.543
17.149		1.425
14.057		2.069
6.702		0.95
9.804		2.101
10.232		1.139
5.815		1.24
5.163		0.629
6.6		0.418

## Sheet: Fig.8o
Figure 8o
CBS and CTH expression in progeria patients (FPKM)
CBS		CTH
Control	Progeria	Control	Progeria
2.513	3.002	0.49	0.674
6.079	9.572	0.415	1.115
12.664	4.278	1.194	0.576
16.107	5.857	0.732	0.924
27.654	3.276	1.475	0.566
4.075	5.619	0.716	1.422
8.602	8.56	1.824	1.419
10.537	6.291	0.809	0.713
10.195		0.492
6.562		1.451
5.657		0.739
19.791		2.543
17.149		1.425
