# Supplementary material for: Lamin A/C-regulated cysteine catabolic flux modulates stem cell fate through epigenome reprogramming
Source: Springer Nature journal article supplement (doi:10.1038/s42255-025-01443-2), 2026-01-28
Supplement: MOESM22 [file 42255_2025_1443_MOESM22_ESM.xlsx]

## Sheet: Extended Data Fig.1a
Extended Data Fig.1a
Distance to the nuclear periphery
Cbs		Cth
Control	Lmna-/-	Control	Lmna-/-
1.593	0.479	0.38	2.817
1.811	0.353	0.579	1.578
2.035	0.439	0.133	1.694
1.437	2.859	0.536	1.088
2.377	1.637	0.441	1.21
0.83	2.289	0.782	1.268
1.216	1.625	0.311	1.857
1.123	0.596	0.097	2.066
0.282	2.919	0.84	1.884
1.079	2.184	0.134	0.534
2.134	0.253	0.222	1.16
0.866	0.845	0.068	0.894
1.879	1.638	1.45	1.249
1.09	0.566	1.486	0.253
0.267	0.981	0.165	0.892
2.584	0.833	0.07	0.825
2.645	1.639	0.129	0.613
0.772	0.699	0.175	2.348
1.047	1.479	0.2	1.526
0.662	0.4	0.066	0.76
0.797	1.808	0.385	1.396
1.732	1.036	0.089	0.791
0.431	1.608	0.234	0.92
2.086	1.166	0.136	0.2
2.864	1.023	0.241	1.17
0.827	2.713	0.569	5.014
1.224	2.232	0.258	4.387
0.757	1.558	0.074	0.89
0.773	2.561	0.099	1.734
1.331	1.264	0.166	0.222
2.157	1.597	0.509	1.211
0.248	2.029	0.579	2.466
0.198	3.138	0.213	1.439
2.296	0.746	0.345	1.364
1.207	0.181	0.178	1.38
1.733	0.703	0.132	1.357
2.174	1.514	0.915	1.703
1.731	1.784	0.302	0.83
0.629	0.599	0.496	0.794
0.561	0.382	0.289	1.404
2.601	2.314	1.055	2.561
0.695	1.282	0.239	2.541
2.415	0.948	0.258	2.391
1.492	0.766	0.178	0.798
2.046	2.248	0.198	3.297
1.597	2.011	0.678	1.743
0.055	0.506	1.201	1.268
0.825	1.82	1.992	2.699
1.921	1.504	1.191	3.141
1.737	1.3	0.351	0.225
0.193	0.893	0.857	1.166
2.722	1.491	0.248	2.158
0.635	1.051	0.298	0.514
1.061	0.9	0.397	1.405
0.298	1.047	0.496	1.109
2.219	1.071	1.789	1.443
1.873	2.248	0.283	2.023
2.208	1.382	0.311	0.489
1.389	1.125	0.502	1.578
1.665	0.738	0.632	0.761
1.369	0.65	0.302	0.83
1.489	3.025	0.124	0.337
0.464	1.987	0.318	0.457
1.496	3.147	0.468	0.877
1.061	2.373	0.248	1.695
0.844	2.219	0.457	0.668
0.982	0.569	0.211	0.397
2.828	1.338	0.149	2.462
1.243	2.491	0.248	3.014
0.447	2.072	0.298	1.145
1.165	0.861	1.591	1.721
3.181	0.337	0.8	0.471
0.267	0.179	0.193	0.511
0.96	0.566	0.305	0.549
2.319	1.365	0.285	0.392
0.843	2.972	1.08	2.515
2.093	2.821	0.468	3.325
1.82	1.584	0.596	1.252
1.225	0.554	0.716	0.626
1.362	0.861	1.349	0.626
2.567	0.126	1.364	4.365
1.132	2.699	0.352	1.687
2.582	0.337	0.504	1.453
0.632	1.404	0.187	0.992
0.734	2.24	0.285	1.44
1.622	0.506	0.07	3.288
0.332	2.525	0.212	2.95
1.406	1.006	0.628	1.72
0.331	1.157	2.046	1.69
0.695	1.588	1.012	1.382
0.728	0.569	0.302	1.459
1.096	0.891	1.068	4.198
0.992	1.213	0.921	0.744
0.867	0.345	1.304	3.607
1.626	0.489	0.563	1.481
2.571	1.664	0.111	0.827
1.038	1.141	0.702	1.655
0.457	2.175	0.14	2.535
1.48	3.072	0.538	0.995
1.317	0.555	0.682	1.567
1.157	1.225	0.285	2.333
2.208	0.457	0.352	2.465
0.645	2.015	0.187	3.083
2.561	0.878	0.305
0.479	1.424	0.511
	2.616	0.604
	1.68
	1.019
	1.628
	1.071
	1.039
	2.362
	0.845
	1.674
	1.161
	0.698
	3.631
	0.845
	2.148
	0.333
	0.666
	0.802
	2.852
	0.447
	0.546
	2.53
	2.507
	0.205
	3.062
	1.492
	2.283
	1.026
	0.988
	1.257
	1.781
	1.252
	2.4
	1.6
	0.814
	2.522
	1.711
	2.84
	1.576
	1.2
	1.589
	0.561
	0.921
	0.817
	1.792
	0.597
	2.768
	1.191
	3.284
	0.647
	0.527
	1.24
	0.902
	1.743
	2.733
	1.193
	0.948

## Sheet: Extended Data Fig.1c
Extended Data Fig.1c: Quantification of relative fold changes in ATAC-seq signal at the promoter, distal, and intergenic regions of Cbs and Cth in Lmna-/- mESCs compared to control mESCs.
seqnames	start	end	width	strand	Conc	Conc_KO	Conc_Ctr	Fold	p.value	FDR	annotation	geneChr	geneStart	geneEnd	geneLength	geneStrand	geneId	transcriptId	distanceToTSS	ENSEMBL	SYMBOL	GENENAME
chr3	157921256	157921795	540	*	5.29	5.81	4.48	1.33	1.61e-05	0.000656	Intron (ENSMUST00000118539.1/107869, intron 1 of 11)	3	157919700	157925051	5352	2	107869	ENSMUST00000125028.1	3256	ENSMUSG00000028179	Cth	cystathionase (cystathionine gamma-lyase)
chr3	157931584	157934787	3204	*	7.02	7.3	6.69	0.61	0.000204	0.00459	Intron (ENSMUST00000198623.4/ENSMUST00000198623.4, intron 2 of 2)	3	157894248	157925077	30830	2	107869	ENSMUST00000118539.1	-6507	ENSMUSG00000028179	Cth	cystathionase (cystathionine gamma-lyase)
chr3	157924654	157925586	933	*	6.46	6.66	6.23	0.43	0.0502	0.222	Promoter (<=1kb)	3	157919700	157925051	5352	2	107869	ENSMUST00000125028.1	0	ENSMUSG00000028179	Cth	cystathionase (cystathionine gamma-lyase)
chr17	31642256	31643309	1054	*	5.06	5.35	4.7	0.65	0.0328	0.147	Distal Intergenic	17	31612640	31637238	24599	2	12411	ENSMUST00000118504.8	-5018	ENSMUSG00000024039	Cbs	cystathionine beta-synthase
chr17	31635948	31637703	1756	*	5.64	5.84	5.42	0.42	0.0829	0.254	Promoter (<=1kb)	17	31608894	31637199	28306	2	12411	ENSMUST00000236853.1	0	ENSMUSG00000024039	Cbs	cystathionine beta-synthase

## Sheet: Extended Data Fig.1d
Extended Data Fig.1d
Cbs and Cth gene expression in RPKM from the RNA-seq
Cth		Cbs
Control	Lmna-/-	Control	Lmna-/-
10.5715	21.1288	4.66867	7.1434
9.08632	20.285	4.15117	8.27627
9.30261	23.8192	4.28686	6.14987

## Sheet: Extended Data Fig.1e
Extended Data Fig.1e
CTH enzyme activity					CBS enzyme activity
Control	Lmna-/-	Purified CTH	Purified CBS	Negative	Control	Lmna-/-	Purified CTH	Purified CBS	Negative
0.54	7.45	89.54	0.23	0	10.94	90.45	0	500.45	0
1.23	10.23	90.56	0.12	0	28.34	120.34	0	450.32	0
0.05	8.43				25.45	80.56

## Sheet: Extended Data Fig.1g
Extended Data Fig.1g: protein relative fold changes
	Control			Lmna-/-
CTH	1.05733	0.98846	0.95421	4.7065	2.39683	2.78843
CBS	0.958709	1.00592	1.03537	3.44809	2.64962	2.4496
3-MST	0.987541	1.02146	0.998541	1.02145	1.21035	0.941257
AHCYL	0.754797	1.04435	1.20085	1.21012	1.08531	0.966411
TS	0.888832	0.968654	1.14251	1.39749	1.13707	0.872747
MTHFD1L	0.754797	1.04435	1.20085	1.21012	1.08531	0.966411
MTHFD2	1.03505	0.975719	0.989228	1.09059	1.22969	1.38367
SHMT1	0.933556	0.99921	1.06723	1.04322	1.15748	1.24365
MTHFR	1.19771	0.803847	0.998441	1.15744	1.12668	0.833479

## Sheet: Extended Data Fig.1j
Extended Data Fig.1j: Relative Cbs and Cth mRNA expression after 3 days of 4µM UNC1999 treatment
Cbs		Cth
Lmna+/+	UNC1999	Lmna+/+	UNC1999
1.20387	19.2466	0.978419	4.01203
0.830652	17.1867	1.02206	5.70728
1.21453	12.3019	0.740786	5.83641
1.27993	15.0408	0.782897	7.40942

## Sheet: Extended Data Fig.1k
Extended Data Fig.1k: H3K27me3 enrichment in Lmna+/+ and Lmna-/- cells
	H3K27me3 enrichment (fold change)
	Lmna+/+				Lmna-/-
Cbs	0.813774	0.649199	1.39909	1.13794	0.286784	0.149082	0.280566	0.480387
Cth	1.20894	1.09622	0.803992	0.890852	0.244495	0.217602	0.378009	0.386007

## Sheet: Extended Data Fig.1l
Extended Data Fig.1l: H3K27me3 enrichment after 3 days of 4µM UNC1999 treatment (% of input)
	H3K27me3 enrichment after 3 days of 4µM UNC1999 treatment (fold change)
	Lmna+/+				UNC1999
Cbs	1.21485	1.05743	0.727723		0.231683	0.106931	0.118812
Cth	0.983571	0.855	1.16143		0.297857	0.261429	0.175714
	SP1 enrichment after 3 days of 4µM UNC1999 treatment (fold change)
	Lmna+/+				UNC1999
Cbs	0.767876	1.28083	0.951295		4.26218	5.83212	3.52539
Cth	1.63149	0.637987	0.730519		5.18669	4.34903	7.18344
