# Supplementary material for: Lamin A/C-regulated cysteine catabolic flux modulates stem cell fate through epigenome reprogramming
Source: Springer Nature journal article supplement (doi:10.1038/s42255-025-01443-2), 2026-01-28
Supplement: MOESM24 [file 42255_2025_1443_MOESM24_ESM.xlsx]

## Sheet: Extended Data Fig.2b
Extended Data Fig.2b
Lamin A/C Fluorescence intensity(a.u.)
Lmna+/+	Lmna G609G/G609G
4.74	13.545
6.919	9.128
12.192	5.261
10.643	11.696
11.38	15.687
9.21	18.522
12.107	14.805
7.079	10.27
9.598	10.638
7.122	9.533
11.675	9.675
12.775	9.568
9.671	5.685
1.442	11.722
8.776	9.66
6.994	12.05
7.893	15.896
28.128	17.166
15.007	19.728
13.584	12.485
12.878	11.487
14.876	12.634
19.286	15.085
12.933	11.771
12.059	4.174
12.647	8.85
17.925	10.234
28.128	13.142
15.007	5.136
13.584	11.229
12.878	9.966
14.876	30.065
19.286	12.091
12.933	10.973
12.059	9.231
12.647	14.574
17.925	15.493
5.705	9.314
8.11	8.181
7.069	13.376
2.265	6.91
9.166	11.628
2.124	11.049
10.916	11.965
15.013	11.344
11.964	9.917
14.718	7.454
7.594	12.395
7.391	1.981
20.923	7.904
10.916	11.285
15.013	11.98
11.964	9.222
14.718	11.679
4.908	11.283
3.822	14.509
5.471	10.607
3.754	15.148
1.778	17.062
5.317	18.106
5.775	16.353
4.536	12.802
2.698	17.426
8.491	9.478
16.106	6.502
6.876	15.926
23.771	2.773
9.989	20.63
7.936	15.288
12.087	6.265
15.058	14.44
6.478
9.656
16.106
6.876
23.771
9.989
7.936
12.087
15.058
6.478
9.656

## Sheet: Extended Data Fig.2c
Extended Data Fig.2c
Genes within Lamin A/LaminB1 LADs	Genes showing decreased ATAC-seq signal in Lmna G609G/+	Genes showing decreased ATAC-seq signal in Lmna G609G/G609G
Rp1	Arid5b	Ank3
Xkr4	Ank3	Slc16a9
Oprk1	Slc16a9	Fam13c
Npbwr1	D630013N20Rik	D630013N20Rik
Rb1cc1	Bicc1	Gnaz
St18	Gm20609	Zfp280b
Sntg1	Zwint	Hs6st1
Cpa6	Hs6st1	Col18a1
A830018L16Rik	Susd2	Mir7659
Trpa1	Gm16222	Gpx4
Kcnb2	Pcbp3	Sbno2
Stau2	Col18a1	1190007I07Rik
Gdap1	Dnmt3l	Npbwr1
Jph1	Mir7659	Appl2
Defb44-ps	Hcn2	Ckap4
Defb18	Abca7	Platr7
NA	Gpx4	Ric8b
Defb41	Abhd17a	Fhl4
Crisp4	Jsrp1	4930486F22Rik
Crispld1	Gadd45b	1810014B01Rik
Pi15	Gng7	Stab2
Tfap2d	Sgta	Tyms-ps
Pkhd1	Creb3l3	Chpt1
Rims1	Gipc3	Slc5a8
Kcnq5	S1pr4	Gas2l3
Mir30a	1700028I16Rik	Uhrf1bp1l
Ppp1r14bl	Appl2	Anks1b
Ogfrl1	Ckap4	4930534H03Rik
Mir30c-2	Btbd11	Elk3
Col19a1	4930486F22Rik	Gm29684
Col9a1	Ano4	5730420D15Rik
Adgrb3	Gas2l3	Mir3058
4931408C20Rik	Anks1b	Nudt4
Gm597	Gm31592	Eea1
Lmbrd1	Elk3	4930459C07Rik
Khdrbs2	Tmcc3	Btg1
Gm4850	4930459C07Rik	Lum
Lgsn	Btg1	4930525C09Rik
Semp2l1	Lum	Atp2b1
Gm9839	Gm8633	Gm18409
4931428L18Rik	Atp2b1	Csl
Dnaaf6	Poc1b	Kitl
Col3a1	Gm18409	Gm35722
Col5a2	Kitl	Mir3059
Gulp1	Gm35722	Mgat4c
Gm3852	Mgat4c	Slc6a15
Stk-ps2	4930532I03Rik	Mettl25
Dnah7b	Lin7a	Ccdc59
Tmeff2		Ppfia2
Mstn	Gm36283	4930532I03Rik
Pms1	Nav3	Acss3
1700019A02Rik	Nap1l1	Myf5
Hecw2	Gm20758	Pawr
Ccdc150	Krr1	Gm36283
Satb2	Glipr1l2	Rb1cc1
Plcl1	Caps2	Syt1
Hsfy2	Kcnc2	Nav3
Boll	Atxn7l3b	9230102K24Rik
9130024F11Rik	Trhde	E2f7
Icos	Tspan8	1700020G17Rik
Pard3b	Kcnmb4	Csrp2
Crygf	4933411E08Rik	Osbpl8
Map2	1700064J06Rik	Nap1l1
Pth2r	Grip1	Phlda1
Unc80	Tmbim4	Gm20758
Erbb4	Llph	Glipr1l1
Cps1	Xpot	Glipr1l2
Ikzf2	BC048403	Caps2
Vwc2l	Mir8104	Kcnc2
Spag16	Usp15	1700010J16Rik
Abca12	Slc16a7	Atxn7l3b
Scg2	Mir378d	Trhde
Ap1s3	March9	Tph2
Kcne4	Kif5a	Tbc1d15
Irs1	Arhgap9	Tspan8
Dock10	Dgka	Ptprb
Nyap2	Olfr823	Kcnmb4os1
Col4a3	Rasl10a	4930579P08Rik
Col4a4	Znrf3	Yeats4
Mff	Myl7	Slc35e3
Rhbdd1	Ccm2	Nup107
Ccl20	Igfbp3	Mdm1
Daw1	Tns3	Grip1
Sphkap	Hus1	Helb
Pid1	Upp1	Irak3
St8sia4	Vwc2	Hmga2
Slco4c1	4930554G24Rik	Gm15910
Fam174a	1700046C09Rik	Msrb3
Ppip5k2	Pom121l12	Wif1
Macir	Sec61g	BC048403
Slco6b1	4933406G16Rik	Avpr1a
Slco6c1	Spred2	Mirlet7i
Pam	Slc1a4	Tafa2
Cdh20	Tmem17	Slc16a7
Cntnap5b	B3gnt2	Lrig3
Slco6d1	Mir6372	Ctdsp2
Rnf152	Fancl	Arhgap9
Phlpp1	Vrk2	Nxph4
Bcl2	Gm12070	Myo1a
Serpinb7	Ccdc85a	Sdr9c7
Serpinb2	Fbxw11	Atp5b
Serpinb3a	Kcnip1	Apon
Serpinb8	Dock2	Mrps9
Cdh19	Dnah7b	Rnf41
Serpinb13	4930553C11Rik	Mir8105
Serpinb10	Mat2b	Mir6917
Cdh7	Ccng1	Dnajc14
Dsel	Gabrg2	Cd63
Serpinb3c	Ebf1	Olfr774
Serpinb3b	Snord95	Olfr782
Serpinb3d	Olfr1389	Olfr807
Serpinb11	0610009B22Rik	Olfr812
Serpinb12	Sar1b	Olfr820
Cntnap5a	Vdac1	Olfr822
Dpp10	Pdlim4	Olfr823
Nckap5	Hand1	Olfr825
Thsd7b	C230029F24Rik	Vmn2r85
Ptprc	Cnot8	Pisd-ps1
Atp6v1g3	Tom1l2	Sfi1
Nek7	Drg2	Limk2
Mir181a-1	Map2k3	Ascc2
Crb1	Tmeff2	Kremen1
Dennd1b	Mfap4	Mrps24
Cfh	Hs3st3b1	Zmiz2
F13b	9630013K17Rik	Gm11981
Cfhr4	Cavin2	Adcy1
Kcnt2	Tmem238l	Igfbp3
Cfhr1	Ntn1	Tns3
Cfhr2	Efnb3	Abca13
Rgs2	Tekt1	Vwc2
Rgs13	Rap1gap2	Ddc
Rgs1	Gm12339	Tex30
Rgs18	Trarg1	Cobl
Brinp3	Nsrp1	4930554G24Rik
Pla2g4a	Aldoc	1700046C09Rik
Pdc	Unc119	Pom121l12
Hmcn1	Nf1	St18
Cacna1e	Rab11fip4os2	Vstm2a
Rasal2	Nab1	Sec61g
Astn1	Gm11426	Cnrip1
Pappa2	AI662270	Mettl21e
Brinp2	Appbp2os	C1d
Mir488	Gm20759	Gm12018
Sec16b	Cuedc1	4933406G16Rik
Tnr	Mrps23	Actr2
Tnn	0610039H22Rik	Rab1a
4930523C07Rik	Akap1	Cep68
Rabgap1l	Tmem100	Slc1a4
Gpr52	Mmd	Sertad2
Fasl	Dnah7a	Gulp1
Tnfsf4	Tob1	Aftph
Suco	Pcmtd1	Lgalsl
Tnfsf18	Gm11544	Vps54
Dnm3	Itga3	Otx1
Dnm3os	Nxph3	Tmem17
Pigc	Mir3063	B3gnt2
Fmo1	Gip	1700061J23Rik
Fmo3	D030028A08Rik	Xpo1
Fmo4	2410003L11Rik	Bcl11a
Fmo6	Mllt6	Gm10466
Fmo2	Lasp1	Mir6372
Mroh9	Plxdc1	Col3a1
Prrx1	Rpl19	Gm12070
Kifap3	Gsdma3	Ccdc85a
Ntmt2	Krt42	Xkr4
Gorab	Ezh1	Rps27a
Sele	Aoc2	4931440F15Rik
Sell	4930417O22Rik	4930505A04Rik
Selp	Tmub2	Psme4
F5	2810433D01Rik	4930524B15Rik
Xcl1	Wnt9b	Wdr75
Dpt	Efcab3	Ranbp17
Gm4846	Tex2	Gabrp
Gm4847	Pecam1	Kcnip1
Fmo9	Kpna2	Slc40a1
Pbx1	Nol11	4930469K13Rik
Rgs4	Pitpnc1	Dock2
Rgs5	Psmd12	Spdl1
Cd48	Cacng1	Slit3
Cd84	Cep112	Mir218-2
Itln1	Kcnj16	Rars
Ly9	BC006965	Wwc1
Cd244a	4732490B19Rik	Dnah7b
Slamf1	Slc39a11	Tenm2
Slamf7	Ttyh2	Dnah7c
Crp	Nat9	4930553C11Rik
Fcer1a	Trim65	Mat2b
Or10j5	Ubald2	Nudcd2
Apcs	Snord1a	Ccng1
Or10j2	St6galnac1	Adam19
Or10j7	Mgat5b	Slc39a10
Or10j27	Snhg20	Sgcd
Or10j3	Mir6516	Rack1
Or10j3b	2900041M22Rik	Ube2b
Ifi208	Tha1	Gm11186
Mndal	Engase	Tnip1
Ifi203	Cbx8	Mfap3
Ifi204	Cbx4	Cnot8
Spta1	Mir1932	Olfr222
Ifi205	Myadml2	Flcn
Ifi209	Dcxr	Tom1l2
Grem2	Cflar	Pcmtd1
Or10x1	Pomc	Aldh3a2
Or6k2	Ncoa1	Ttc19
Or10x4	1700101O22Rik	Ncor1
Or10z1	Gm34637	Cenpv
Or10aa3	Lpin1	Tmeff2
Or10aa1	Hpcal1	Pmp22
Or6n2	1700030C10Rik	Hs3st3b1
Olfr421-ps1	Sumo1	9630013K17Rik
Or6k4	Rps7	Hs3st3a1
Or6n1	Eipr1	Gm12295
Or6p1	Gm31508	Zkscan6
Or6k14	Lamb1	Cavin2
Ifi202b	Twistnb	Tmem220
Ifi211	Ahr	Rcvrn
Or6k6	Tspan13	Hes7
Fmn2	Immp2l	Efnb3
Ifi214	Lrrn3	Rnasek
Ifi213	Ctla4	Nup88
Mptx1	Nova1	Wscd1
Chml	Foxg1	Gm17767
Opn3	Egln3	Myo1b
Fh1	Sec23a	Olfr378
Rgs7	Rpl10l	Pafah1b1
Wdr64	Mdga2	Nufip2
Kmo	Lrr1	Slc13a2os
Pld5	Ino80d	Ksr1
Rbm8a2	3110056K07Rik	5730455P16Rik
Cep170	1700083H02Rik	Rffl
Mir350	Dbpht2	AI662270
Sdccag8	Esr2	Hnf1b
Akt3	Ppp1r36	Mrm1
Lyplal1	Max	Appbp2os
Spata17	Rad51b	Med13
Ush2a	9430078K24Rik	Rnft1
Esrrg	Zfyve1	Ptrh2
Kcnk2	Rbm25	Cuedc1
Cd34	D030025P21Rik	Mrps23
Cr2	Prox2	0610039H22Rik
Cr1l	Rps6kl1	Akap1
Cd46	Esrrb	Gm525
Plxna2	Vash1	Mmd
Gm16897	Lrrc74a	Tom1l1
A330023F24Rik	Mir3068	Kif2b
Mir29c	Nrxn3	Car10
Mir29b-2	5430427M07Rik	Utp18
Oprm1	4930559C10Rik	Stk17b
Ipcef1	Mir8099-1	Nme1
Rgs17	Pth2r	Chad
Vip	Sntg1	Gm11544
Syne1	1700019M22Rik	Nxph3
Esr1	Zc3h14	Mrpl45
Grm1	Foxn3	Mllt6
Samd5	Psmc1	Pgap1
Gm5177	Kif4-ps	Hspd1
Rab32	Ppp4r4	Ezh1
Stxbp5	Dicer1	Slc4a1
Epm2a	Vrk1	Higd1b
Phactr2	Hhipl1	Rftn2
Aig1	Mir342	Nmt1
Hivep2	Degs2	Hexim2
Adgrg6	Meg3	Tlk2
Nmbr	Mir3072	Mrc2
Vta1	Ppp2r5c	Cyb561
Gje1	Amn	Map3k3
Eya4	Gm266	9130227L01Rik
Gm9767	Mark3	Bptf
L3mbtl3	Tmem121	Nol11
Samd3	Adam6a	Pitpnc1
Tmem200a	Mir7094-1	Hsfy2
Lama2	Mir7094-2	Cep112
Gm8709	Mir6388	Gm45916
Arhgap18	1700016G22Rik	Abca9
4930519F09Rik	Dip2c	Map2k6
Ptprk	Zmynd11	Kcnj16
Themis	Prl2c3	Kcnj2
9330159F19Rik	Prl2c2	BC006965
Echdc1	Hecw1	BC055402
Soga3	Gpr141	Maip1
2310057J18Rik	Elmo1	Rpl38
Rspo3	Zfp184	Gpr142
Supt4b	Igfbp2	Slc16a5
Clvs2	4930586N03Rik	Smim5
Sult3a2	Hist1h4b	Spats2l
Tpd52l1	Tnp1	Snord1a
Rnf217	4930401O12Rik	BC018473
Nkain2	Serpinb9	Snhg20
Sult3a1	Slc22a23	Sec14l1
Trdn	Cdyl	Usp36
Col10a1	Rreb1	Ccdc40
Frk	Eef1e1	Mir6935
Nt5dc1	Gcnt2	Flacc1
Hs3st5	Phactr1	Dnmt3a
Grik2	Cd83	Ncoa1
Hace1	Jarid2	Trak2
Lin28b	Gmpr	1700101O22Rik
Ascc3	Atxn1	Gdf7
Lilrb4b	A930002C04Rik	Gm38407
Lilrb4a	G630093K05Rik	Kcns3
Ros1	Id4	Mir7675
Sim1	Barx1	Gm34637
Gprc6a	Phf2	Lratd1
Vgll2	Iars	Gm16497
Rfx6	9430083A17Rik	Mir6387
Fam162b	Spin1	Trib2
Slc35f1	Gadd45g	Kcnf1
Zfa-ps	Ror2	5730507C01Rik
Man1a	Cltb	1700030C10Rik
Fam184a	Unc5a	Gm4425
Tbc1d32	Hk3	2410018L13Rik
Msl3l2	Mxd3	Snord70
Fabp7	H2afy	Gm29687
Pkib	Spock1	Gm29968
Smpdl3a	Slc28a3	Eipr1
Lrrtm3	Ntrk2	Tpo
Ctnna3	Zfp808	Fam110c
Tmem26	Zfp934	Nampt
1700049L16Rik	Hsd17b3	Atxn7l1
Pcdh15	Gm10324	Ahr
Or7a41	2410141K09Rik	Agr3
Or7a42	Slc4a3	Abi2
Or7a39	2610203C22Rik	Agmo
Or7c70	D730050B12Rik	Arl4a
Or7a35	Eprn	Immp2l
Or7a37	Fam172a	Lrrn3
Or7a36	Nr2f1	Gm33340
Or7a38	Arrdc3	Dnajb9
Vmn2r81	Mir3961	Stxbp6
Vmn2r80	Mef2c	Nova1
Vmn2r82	Gm17750	Foxg1
Vmn2r83	Tmem161b	Prkd1
1700113H08Rik	Cox7c	1700008C04Rik
Pah	Edil3	Ap4s1
Pmch	Vcan	Egln3
Parpbp	Xrcc4	Ppp2r3c
Slc5a8	Tmem167	Psma6
Ano4	Rps23	Pard3bos2
Nr1h4	Rasgrf2	Brms1l
Slc17a8	A630019I02Rik	Gm19990
Bltp3b	Cmya5	Mbip
Anks1b	Sv2c	Foxa1
Mir1251	Col4a3bp	Sstr1
Rmst	Lncenc1	Fbxo33
Mir135a-2	Mrps27	Spanxn4
Nedd1	Mrpl44	4930487H11Rik
Gm10754	Naip7	Fscb
Dcn	Cd180	Gm527
Epyc	Adamts6	Rpl10l
Kera	4933425L06Rik	Mdga2
Lum	Rnf180	Rps29
Ccer1	Ipo11	Tmx1
Csl	Pde4d	Frmd6
Gm4302	Mir1904	Ccdc175
Gm4307	Mier3	4930447C04Rik
Gm4312	Isl1	Hif1a
Kitl	1700003P14Rik	Mir5101
Tmtc3	Gm21188	Dytn
Cep290	D830030K20Rik	Max
Mir3059	1700110I01Rik	Fut8
Alx1	Gm10408	Mpp5
Rassf9	Gm5796	Rad51b
1700017N19Rik	2610042L04Rik	Mir1843a
Nts	Gm3264	Cox16
Mgat4c	Gm3488	Map3k9
Gm4340	Gm3500	Pcnx
Slc6a15	Gm3317	Sipa1l1
Lin7a	Gm3383	Mettl21a
Myf5	Gm3636	Rbm25
Myf6	Gm10406	Numb
Mettl25	Gm5797	Fos
Ptprq	4933406F09Rik	Esrrb
Tmtc2	Gm3558	Ism2
Ppfia2	4930455B14Rik	Gm46993
Acss3	Fhit	Gm5039
Ccdc59	Ptprg	Nrxn3
Otogl	Fezf2	Dio2
Lrriq1	Cadps	Gtf2a1
Syt1	Gm5087	Ston2
Brcc3dc	Sntn	Sel1l
9230102K24Rik	Oxsm	4930559C10Rik
Nav3	Thrb	Mir8099-1
Tph2	Nkiras1	Flrt2
Trhde	Gm5458	Sntg1
Kcnc2	Kcnk5	Pth2r
Caps2	Kat6b	Crygf
Atxn7l3b	Lrmda	1700019M22Rik
Glipr1l2	Il17rd	Galc
Glipr1l1	Gm7609	Spata7
Lgr5	Wapl	Foxn3
Ptprr	Grid1	Map2
Tspan8	Ghitm	Tdp1
Taf7l2	Gm17026	Gpr68
Gm4489	1700001F09Rik	Ppp4r3a
Avpr1a	Gm1821	Kif4-ps
Slc16a7	Bmp4	Catsperb
Tafa2	4930447J18Rik	Lgmn
4930503E24Rik	Otx2os1	Unc79
Or10u4	Naa30	Ppp4r4
Neurod4	Armh4	Dicer1
Or10p22	Rpph1	Tcl1
Or6c204	Pnp2	Cps1
Or6c203	Gm5622	Bcl11b
Or6c2b	Cpa6	Mir3072
Or6c6	Gm30214	Ppp2r5c
Or6c6c	Il17d	Erbb4
Or6c5c	Eef1akmt1	Btbd6
Or6c66b	Zdhhc20	Tmem121
Or6c5	Tnfrsf19	Adam6a
Or6c76b	Ints9	Mir7094-1
Or10u3	Fzd3	Mir7094-2
Or6c68	Nkx2-6	Spag16
Or6c211	Rhobtb2	Mir6388
Or9k7	Pebp4	Zfp386
Or6c8	Lpar6	D430020J02Rik
Or6c76	Itm2b	Vwc2l
Or6c88	Lrch1	Cdca7l
Or6c207	Snora31	Dnah11
Or6c205	Gtf2f2	D230030E09Rik
Or6c202	Gigyf2	Sp8
Or6c210	1700108F19Rik	Abcb5
Or6c1b	Lacc1	Bard1
Or6c69b	Enox1	Tmem196
Or6c3	Gm32455	Speer6-ps1
Or6c215	Tdrd3	Asb13
Or6c213	Gm5088	Net1
Or6c3b	4930474H20Rik	Akr1c14
Or6c212	Pcdh9	Akr1c18
Or6c66	Klf5	Akr1c12
Or6c217	Fbxl3	Akr1e1
Or6c69c	Sh3bp4	1700016G22Rik
Or6c69	Mir6390	Pitrm1
Or9r3	Slitrk5	Fn1
Or9r7	Gpc5	Pfkp
Or6c33	Gpr180	Wdr37
Or9k2b	Cops8	Idi1
Or9k2	B930095G15Rik	Apol7d
Or6c35	Slc15a1	Larp4b
Or6c208	1700108J01Rik	Dip2c
Or6c74	Pcca	4933417E11Rik
Or6c219	Fgf14	Zp4-ps
Or6c216	Plcxd3	Ryr2
Or10p21	Snord72	Heatr1
Or6c201	Dab2	Lgals8
Or6c38	Cplane1	Prl2c4
Or6c209	Skp2	Prl2c3
Or6c65	Golph3	Prl2c2
Or6c214	Cdh9	Prl2c5
Or6c2	4921515E04Rik	Nid1
Or10p1	Cdh10	Lyst
Or6c1	Gm35496	Arid4b
Or6c75	Cdh18	Hecw1
Or6c70	Retreg1	AW209491
Or6c206	Sdc2	B230303A05Rik
Olfr765	Rpl30	Sugct
Vmn2r85	Pabpc1	Mplkip
Vmn2r84	Ywhaz	Mir466i
Vmn2r86	Grhl2	Cdk13
Vmn2r87	Rims2	Amph
Tespa1	Dcstamp	Epdr1
Abca13	Gm33251	Gpr141
Ikzf1	Rspo2	Elmo1
Vwc2	Eny2	Gpx5
Zpbp	Sybu	Mir1983
Spata48	4930548G14Rik	Igfbp2
Vstm2a	Csmd3	Vmn1r211
Pom121l12	Gm2491	Btn1a1
Egfr	Fam91a1	Scgn
Fbxo48	Nsmce2	Nrsn1
Cnrip1	Myc	Gm11351
Plek	Efr3a	1700092E19Rik
Eldr	Panct2	Hus1b
4932414J04Rik	Tg	4930401O12Rik
Wdpcp	4930504C09Rik	Foxf2
Ehbp1	Fam135b	Gmds
Gm10466	Slc45a4	Serpinb6d
5730522E02Rik	Gm32168	Cdyl
Ccdc85a	A830018L16Rik	Ly86
Gm12070	Nrbp2	Slc35b3
Fancl	Foxh1	Gm26688
Vrk2	Rpl8	Gcnt2
Efemp1	Apol8	Phactr1
Mir216a	Myh9	Jarid2
Mir217	Txn2	Gmpr
Mir216b	Eif3d	Fam8a1
Ccdc88a	Dmc1	Nhlrc1
Eml6	Apobec3	Id4
4930505A04Rik	Nfam1	Fam120aos
Acyp2	Cntnap5b	Iars
Asb3	Alg10b	Mir683-2
Tenm2	Pdzrn4	4930518P08Rik
Gabra1	9430014N10Rik	9430083A17Rik
Gabra6	Tmem117	Sema4d
Gabrb2	Gm4371	Gm16582
Gabrg2	2610037D02Rik	Gadd45g
Atp10b	Slc38a4	Ror2
Adra1b	4930415O20Rik	Trpc7
Ebf1	Cacnb3	Slc28a3
Havcr1	4930578M01Rik	Ntrk2
Timd2	Fam186a	Golm1
Gm4926	Slc4a8	Dapk1
Sgcd	Acvrl1	Cts6
Timd4	Rbfox1	BC052688
Dppa1	Abat	Zfp808
BC053393	Usp7	Zfp935
Tgtp2	1810013L24Rik	Zfp934
Ifi47	Atf7ip2	Des
Or2v1	Emp2	Ptch1
9930111J21Rik2	Bmerb1	Hsd17b3
Or2o1	Marf1	Fam240b
Or2v2	Abcc1
Or2t26	A630010A05Rik	Gm10324
Gm5431	Spidr	2410141K09Rik
Gm12185	Olfr19	Uqcrb
9930111J21Rik1	Hic2	Zfp273
Or2y1b	Vpreb2	4930525G20Rik
Or2y1c	Gnb1l	Urml
Or2y12	Eif2b5	Slc4a3
Or2y1	Map3k13	Tent4a
Or2y16	Eif4a2	Med10
Or2y1e	Tmem207	D730050B12Rik
Or2y11	Gm10823	4930555K05Rik
Or2y1f	Opa1	Eprn
Or2y14	Xxylt1	Slc6a3
Or2y15	Gm15743	Slc12a7
Or2y17	Ncbp2	Cast
Or2y1d	Pigx	Mir682
Or2y10	Cep19	Mir6352
Or2y13	Zdhhc19	Ell2
Glra1	Slc49a4	Glrx
Gria1	Parp14	Mctp1
Hs3st3a1	Polq	Fam172a
Dnah9	Stxbp5l	Nr2f1
Shisa6	Serpinb13	Arrdc3
Nlrp1a	Zbtb20	9330111N05Rik
Nlrp1c-ps	Serpinb3c	Adgrv1
Nlrp1b	Gm5485	Mir3961
Or1e17	1700116B05Rik	Mef2c
Or1p1	Sulf1	Gm17750
Or1e25	Cdh19	Tmem161b
Or1p1c	Epha6	Ccnh
Or1e36-ps1	Nsun3	Cox7c
Or1e31	Cggbp1	Edil3
Or1e1f	Htr1f	Vcan
Or1e30	Chmp2b	Mogat1
Or1e23	Cadm2	Xrcc4
Or3a1b	D16Ertd519e	Tmem167
Or3a1	8030451O07Rik	Atp6ap1l
Or3a1c	Robo1	Atg10
Or3a1d	Lipi	Ssbp2
Or1r1	Hspa13	Rasgrf2
Or1a1b	Samsn1	Msh3
Or1e16	Gm32810	Serinc5
Or1e1c	Usp25	Gm4814
Or1e1	1700066C05Rik	A630019I02Rik
Or3a10	Ncam2	Cmya5
Or3a4	4930553E22Rik	Lhfpl2
Or1e35	Gm32461	Ap3b1
Or1e32	Gm32865	Otp
Or1e34	Ltn1	Sv2c
Or1e33	Cct8	Gcnt4
Or1e29	Cldn8	Enc1
Or1e22	Tiam1	Lncenc1
Or1e26	Hunk	Gm5086
Or1e19	Ifngr2	Arhgef28
Or1e21	2310043M15Rik	1700024P04Rik
Zfp616	Chaf1b	Ptcd2
Spata22	Cldn14	Mrpl44
Or1a1	Sim2	Serpine2
Zfp735	Hlcs	Taf9
Ccl11	Dyrk1a	Slc30a5
Ccl12	Kcnj6	Pik3r1
Ccl7	1600002D24Rik	Cd180
Ccl8	Tmem181a	1700099I09Rik
Stxbp4	Dynlt1f	Fam124b
Car10	Rps6ka2	Srek1
Kif2b	Prkn	Trim23
Efcab3	Slc22a1	Adamts6
Marchf10	Tcp10c	Cwc27
Tanc2	Gm7168	Shisal2b
Cep112	Dact2	Rnf180
Abca8a	Zfp960	Htr1a
Abca9	Gm5092	Ipo11
Abca5	Zfp677	Zswim6
Abca8b	Zscan10	Depdc1b
1700012B07Rik	Tfcp2l1	Pde4d
Abca6	Cldn6	Mir582
Kcnj16	Cldn9	Mir1904
Map2k6	Pkmyt1	Plk2
BC006965	Dnase1l2	Gm15290
Ldah	Tpsab1	Gm15326
Rdh14	9630028I04Rik	Mir6344
Nt5c1b	Srsf3	Gzma
Rad51ap2	Pim1	Esm1
Vsnl1	Gm6402	Hspb3
Tubb2a-ps2	Btbd9	Arl15
Lratd1	Dnah8	Ndufs4
Nbas	Glp1r	Itga2
Sh3yl1	Tff3	Pelo
Sntg2	Rsph1	Isl1
Ccdc71l	Sik1	Emb
Snx13	Cyp4f15	Hcn1
Prps1l1	Adamts10	4933413L06Rik
Hdac9	1110038B12Rik	Mrps30
Agr2	Lst1	1700003P14Rik
Agr3	Mir8094	Nnt
Etv1	Dhx16	Hmgcs1
Meox2	1700031A10Rik	AF067063
Dgkb	Esp23	Agfg1
Agmo	Glyatl3	B020031M17Rik
Sostdc1	Rcan2	Gm21188
Lrrc72	Hsp90ab1	Gm5795
Crppa	Mymx	1700110I01Rik
Scin	Slc22a7	Gm10408
Lsmem1	Bicral	Slc19a3
Dock4	Trerf1	Gm5796
Lrrn3	Ccnd3	2610042L04Rik
Immp2l	Tfeb	Gm3264
Stxbp6	Foxp4	4930555G01Rik
Nrcam	Gm27217	Gm3317
Nova1	Kcnh8	Gm3488
Prkd1	Sult1c2	Gm3383
3110039M20Rik	Slc5a7	LOC100861615
Akap6	1700025K24Rik	Gm10406
Npas3	Vmn2r118	Gm5797
Slc25a21	Znrf4	4933406F09Rik
Mipol1	Vmac	Gm3558
Sstr1	Gtf2f1	4930455B14Rik
Clec14a	Cntnap5c	Mnd1-ps
Ttc6	Nudt12	Fhitos
Lrfn5	Efna5	Fhit
Fscb	1110058D11Rik	Ptprg
Gm17821	Mtcl1	Pid1
Mdga2	Ptprm	Gm5087
Syt16	Dpp10	Sntn
Kcnh5	Lpin2	Slc4a7
Rhoj	Lclat1	B230110C06Rik
Fut8	Crim1	Lrrc3b
Gphn	Vit	Oxsm
Pals1	Atl2	Top2b
Garin2	Hnrnpll	Rarb
Gm1995	Sos1	Pou5f1-rs6
Eif1ad3	Slc8a1	Thrb
Eif1ad4	Kcng3	Rpl15
Pramel51	C430042M11Rik	Ube2e1
Ubl5b	4933433H22Rik	Ube2e2
Oog1	Dync2li1	Gm5458
Eif1ad15	Nckap5	Nid2
Eif1ad7	Foxn2	D14Ertd670e
Eif1ad2	Lhcgr	Gng2
Gm7104	Gm4719	Saysd1
Eif1ad8	Nrxn1	Ap3m1
Dio2	Adcyap1	Kat6b
Nrxn3	Crem	Rps24
Cep128	Cul2	Slmap
Tshr	Zeb1	Il17rd
Galc	Kif5b	Arhgef3
Gpr65	Rab18	Erc2
Flrt2	Wac	Mustn1
1700019M22Rik	Thoc1	A530032D15Rik
Kcnk10	Usp14	Arhgap22
Fbln5	Mir1a-2	Bmpr1a
Catsperb	Aqp4	Gm7609
Tc2n	1700001G01Rik	Grid1
Kif4-ps	Dsc3	4930474N05Rik
Adam6b	Ttr	Ccser2
Adam6a	Asxl3	Ghitm
Dync2i1	Gm38410	Nrg3os
Vipr2	AW554918	LOC432842
Ptprn2	Celf4	Gm17026
D430020J02Rik	Dars	1700001F09Rik
Esyt2	Pik3c3	Gm10375
Ncapg2	Camk4	Ear1
Dnah11	Apc	1700047E10Rik
Sp4	Cxcr4	Ptgdr
Cdca7l	Wnt8a	Fermt2
Tmem196	4933408B17Rik	Ddhd1
Macc1	Reep2	Ktn1
Itgb8	Ube2d2a	Otx2os1
Abcb5	Cxxc5	Naa30
Speer6-ps1	Slc25a2	Armh4
Akr1c14	Arhgap26	Olfr725
Akr1c20	Zp3r	Sp110
Akr1e1	A930012L18Rik	Ccnb1ip1
Akr1c21	Commd10	Gm5622
Akr1c6	Eno1b	Cpa6
Adarb2	1700065O20Rik	9930111H07Rik
Chrm3	Hsd17b4	Gm30214
Ryr2	Prr16	Ajuba
Zp4-ps	Ancv1r	4931414P19Rik
Prl2c5	Snx2	Zfhx2os
Prl2c2	Fbn2	Nfatc4
Prl2c3	Rps14	Amer2
Hecw1	Mir5107	Spata13
Gli3	Cdx1	Dleu2
Inhba	Slc26a2	Tdh
Sugct	Wdr7	Msra
Pou6f2	Zfp532	Kif13b
Vps41	Dynap	Fzd3
Amph	Mex3c	Scara5
Gpr141b	Smad4	Gnrh1
Gpr141	Cxxc1	Ppp3cc
Nme8	Myo5b	Mir687
Elmo1	Scarna17	Lpar6
Aoah	2010010A06Rik	Esd
Or2w1	Zbtb7c	Lrch1
Or2ad1	Rnf165	Lcp1
Or2p2	Haus1	Snora31
Vmn1r223	Pard6g	2900040C04Rik
Vmn1r196	Hsbp1l1	Tsc22d1
Vmn1r221	Mir5127	Lacc1
Vmn1r-ps103	Galr1	Enox1
Vmn1r200	Zfp407	Gm6994
Vmn1r199	Gm38576	Vwa8
Vmn1r214	Fbxo15	Gm4632
Vmn1r213	Neto1	Inpp5d
Vmn1r206	Socs6	Olfm4
Vmn1r205	Cd226	Gm32455
Vmn1r208	Gm45871	9630013A20Rik
Vmn1r215	Mir12192	Tdrd3
Vmn1r198	Ovol1	Pcdh20
Vmn1r201	Pygm	4930474H20Rik
Vmn1r218	Slc22a12	Pcdh9
Vmn1r195	Otub1	Glrp1
Vmn1r202	Mark2	Klhl1
Vmn1r193	Chrm1	Prex2
Vmn1r210	Slc3a2	Dach1
Vmn1r203	Stxbp3-ps	Klf5
Vmn1r220	Tmem258	Klf12
Vmn1r219	Myrf	Platr5
Vmn1r217	Psat1	Sh3bp4
Vmn1r222	Fam189a2	5430440P10Rik
Vmn1r212	D930032P07Rik	Mir6390
Vmn1r211	Gm9895	Spry2
Vmn1r197	Cstf2t	Slitrk1
Vmn1r216	Lgi1	Slitrk5
Vmn1r189	Slc35g1	4930524C18Rik
Vmn1r192	Cyp2c67	4930505G20Rik
Vmn1r188	Avpi1	Gpr180
Vmn1r207	Tnnt2	Abcc4
Vmn1r209	Btrc	Cldn10
Vmn1r194	Sorcs3	Dnajc3
Vmn1r191	Sorcs1	Uggt2
Vmn1r204	Ins1	Cops8
Dcdc2a	Xpnpep1	Mbnl2
Nrsn1	Mxi1	B930095G15Rik
Prl8a2	Rbm20	Dock9
Hdgfl1	Adra2a	Mlph
Prl3d1	Trub1	Pcca
Prl3b1	Cdnf	1700024B18Rik
Prl7d1	Echdc3	Lrrfip1
Prl	Usp6nl	Fgf14
Prl4a1	Celf2	BC037032
Prl6a1	Gm13262	C6
Prl8a6	Sfmbt2	C7
Prl7a1	8030442B05Rik	Card6
Prl7a2	Ankrd16	Ptger4
Prl3d2	Itga8	5430437J10Rik
Prl3d3	Mindy3	Gm41259
Prl3c1	St8sia6	Dab2
Prl5a1	Stam	Lifr
Prl2a1	Cacnb2	Egflam
Prl2b1	Gm13315	Cplane1
Prl2c1	Nsun6	Slc1a3
Prl3a1	Kcnb2	Skp2
Prl8a9	Plxdc2	Spef2
Prl7c1	H2al2a	A830018L16Rik
Prl8a1	Etl4	Gm10389
Prl8a8	Arhgap21	Rai14
Prl7b1	Myo3a	4930556M19Rik
Gmds	Hnmt	Tars
Mylk4	Pax8	Mir6900
Serpinb6b	Mir6996	Cdh6
Serpinb9c	Egfl7	Cdh9
Serpinb9f	Slc2a6	4921515E04Rik
Serpinb9e	Gfi1b	Cdh10
Serpinb9d	Barhl1	Gm35496
Serpinb6d	Mir133c	Cdh12
Serpinb6e	Rapgef1	Cdh18
Serpinb9g	Pkn3	Myo10
Serpinb6c	Lrrc8a	Ank
F13a1	Ier5l	Mir3964
Ofcc1	Hmcn2	Ctnnd2
Ctsq	Gm5424	Crocc2
Cts8-ps	Fubp3	4930430F21Rik
Tpbpb	Prrc2b	Cpq
Cts3	St6galnac6	Stk3
Ctla2a	Fam129b	Cox6c
Ctla2b	Lmx1b	Rgs22
Tpbpa	Gapvd1	Zfp706
Ctsj	Dab2ip	Grhl2
Cts7	Ndufa8	Gm16136
Cts8	Ptgs1	Ncald
Ctsr	Crb2	Odf1
Cts6	Arhgap15os	Rims2
Ctsm	Gtdc1	Zfpm2
Adcy2	Acvr2a	4930555K19Rik
Adamts16	Gm48908	Oxr1
Cast	Rif1	Abra
Pcsk1	Gm4788	Angpt1
Mir682	Kcnj3	Emc2
Erap1	Galnt5	Trhr
Rfesd	Wdsub1	Ebag9
Rhobtb3	Ly75	A930017M01Rik
Spata9	Gm13582	Gal3st2
Slf1	Kcnh7	1700022A22Rik
Fam172a	Fign	4930548G14Rik
2210408I21Rik	Scn7a	Csmd3
Pou5f2	Mir7224	Trps1
Mctp1	Cers6	Rad21
Adgrv1	Nostrin	Med30
9330111N05Rik	Klhl23	Ext1
Cetn3	Sp5	Samd12
Mef2c	Gad1	Deptor
Rasa1	Tlk1	Has2os
Tmem161b	Dync1i2	4930440C22Rik
Hapln1	Slc25a12	Slc22a22
Vcan	Platr26	Fbxo32
Edil3	Pdk1	Fam174a
Xrcc4	4930444P10Rik	Mtss1
Atg10	Osbpl6	Nsmce2
4833422C13Rik	Ttn	9930014A18Rik
Ssbp2	Zswim2	Pvt1
Acot12	Calcrl	Fam49b
Ckmt2	Ctnnd1	Asap1
Rasgrf2	Olfr1037	Oc90
Naip1	Olfr1173	Hhla1
Naip2	Atg13	Panct2
Naip5	Alx4	Lrrc6
Naip6	Lrrc4c	1700012I11Rik
Naip7	Commd9	Slco6c1
Mast4	Cd59a	Gm41341
Erbin	Eif3m	4930504C09Rik
Adamts6	Rgs18	Gm32168
Cwc27	Mettl15	Mapk15
Rgs7bp	Kif18a	Mb
Nt5el	Olfr1297	Rbfox2
Rnf180	Ryr3	Mir6341
Htr1a	C130080G10Rik	Apobec3
Pde4d	Tmco5	Syngr1
Mir582	Brinp3	Slco6d1
Plk2	Rtf1	Rbx1
Gapt	Tyro3	Pmm1
Actbl2	Capn3	Mir6393
Rab3c	Slc28a2	Cntnap5b
Itga1	Mir147	Syce3
Itga2	Sqor	Rabl2
Parp8	Fbn1	Syt10
Emb	Hdc	Alg10b
Hcn1	Kcnip3	Smgc
Fgf10	Prom2	Cntn1
Nnt	Pla2g4a	Gm20268
Gm10406	5330413P13Rik	Gxylt1
Gm2897	Tmem230	Yaf2
Gm3002	Cds2	Dbx2
Gm3020	Mir3090	Slc38a2
Gm3696	Tmx4	Slc38a4
4930555G01Rik	9630028H03Rik	Gm32885
D830030K20Rik	Snap25	Pced1b
Gm5796	Slx4ip	Amigo2
Gm5797	Btbd3	Tmem106c
4933406F09Rik	Ism1	Ddx23
Cfap20dc	Flrt3	Tuba1a
Mnd1-ps	Kif16b	Mcrs1
Fhit	Snord17	Gpd1
Cadps	Hmcn1	Lima1
Gm5087	Zfp133-ps	Tmprss12
Synpr	Ralgapa2	Fignl2
Sntn	E130215H24Rik	Sp1
Il3ra	Defb23	Cdh20
Or2t1	Defb19	Nfe2
Or2t6	Id1	Olfr161
Lrrc3b	Bcl2l1	1700123O21Rik
Thrb	Eif2s2	Abat
Rarb	Acss2os	1810013L24Rik
Ube2e2	Phf20	Atf7ip2
Gm5458	Dlgap4	Litaf
Grid1	Src	Mir1945
4930474N05Rik	Tti1	A930007A09Rik
4930596D02Rik	Dhx35	Bmerb1
Nrg3	4933416E03Rik	Rp1
Mat1a	Ptprt	Spidr
Mbl1	Gtsf1l	Dnm1l
Sftpa1	Eya2	Olfr19
Dydc1	Ncoa3	Vpreb2
Gm10375	Sulf2	Rtn4r
Ang3	Gm29679	Olfr166
Ear1	Prex1	Eif2b5
Ear2	Ptgis	Gm6551
BC061237	B4galt5	Rnf152
Ang5	Lamc2	Vps8
Ear12	Adnp	Igf2bp2
Ang6	Kcng1	Etv5
Gm8267	Atp9a	Hrg
1700001F09Rik	Sall4	Snora81
4930503E14Rik	Zfp64	Sst
Ear10	Tshz2	A230028O05Rik
Ptger2	Gm17619	Trp63
Gpr137c	Tfap2c	Gmnc
Or11g27	Bmp7	Gm10823
Tlr11	Gnas	Cpn2
Or11g2	Gm14393	Xxylt1
Or4q3	Zfp970	Zcchc2
Or4k1	Gm14403	Bdh1
Or11h23	Zfp972	Pak2
Or11g25	Cdh26	Gm20753
Or11h4b	4930591A17Rik	Rnf168
Or4k5	Lama5	Zdhhc19
Or11h7	Cables2	Phlpp1
Or11h6	Ntsr1	Itgb5
Or4k15c	Mir124a-3	Hacd2
Or4k15b	Nkain4	Slc49a4
Or4k15	Myt1	Parp14
Or4k6	Hnf4g	Dtx3l
Or11g26	Pex2	Kpna1
Or4l15	Gm6194	Cd86
Or4k2	Mrps28	Fstl1
Or4n5	Tpd52	BC031361
Or4n4b	Fabp4	Timmdc1
Or4m1	Snx16	Igsf11
Or4n4	Gm10745	Lsamp
Or11j4	Ralyl	Mir6540
Or11g7	Ythdf3	Gap43
Or11g1	Gm30223	4932412D23Rik
Or11g24	Armc1	Serpinb3c
Or4l1	Crh	Cfap44
Or11h4	Agtr1b	Btla
Ang4	Tbl1xr1	Sulf1
Vmn2r89	Rprl2	Gcsam
AY358078	Slc2a2	Cd96
Gm5622	Tdrd5	Nectin3
Gm5800	Spry1	Gm5485
Vmn2r88	Tor3a	Morc1
Or10g1b	Ankrd50	Trat1
Or10g1	D3Ertd751e	1700116B05Rik
Or4e5	2610316D01Rik	D830032E09Rik
Or4e1	Pabpc4l	Gm29686
Or4e2	1700018B24Rik	Alcam
Adam7	Nbea	4930404A05Rik
Adam28	Selenot	Mir5118
Stc1	Rap2b	Cdh7
Adamdec1	Gpr149	Lnp1
Lrrc63	Vmn2r3	Mir1970b
Pcdh17	Sec16b	Gpr15
9630013A20Rik	Brinp2	Olfr202
Olfm4	Mlf1	Epha6
Diaph3	Gm6634	Pros1
Tdrd3	4930509J09Rik	Epha3
Pcdh20	Rapgef2	Cdh19
Gm5088	Dclk2	Chmp2b
Dach1	Pear1	Vgll3
Pcdh9	Mir3093	Cadm2
Spertl	Ssr2	4930428D20Rik
Klhl1	Dcst2	Dsel
Tbc1d4	Hax1	4930567J20Rik
Prr30	Pglyrp3	8030451O07Rik
Lmo7	Prr9	Robo1
Mycbp2	Mir5124a	Mir691
Scel	Cgn	Robo2
Ednrb	Pogz	Rbm11
D130009I18Rik	Prpf3	Hspa13
Obi1	Anp32e	Samsn1
Trim52	Platr30	4930578N18Rik
Slitrk6	BC107364	Gm30790
Slitrk5	Pdzk1	Gm32810
Slitrk1	Olfr1402	Usp25
Gpc5	Mir6481	Mir99ahg
Gpc6	4930406D18Rik	Mir99a
Oxgr1	Mab21l3	E330011O21Rik
Hs6st3	Vangl1	Btg3
Uggt2	Bcas2	4930478L05Rik
Pcca	Olfml3	Tmprss15
Ggact	Gm6602	1700066C05Rik
Tmtc4	Olfm3	Ncam2
Fgf14	Ptbp2	4930553E22Rik
Itgbl1	Cnn3	4930529L06Rik
Nalcn	Ndst3	Jam2
Ccdc152	Tram1l1	Atp5j
Ghr	1700006A11Rik	App
C6	1700003H04Rik	Cyyr1
Mroh2b	Ugt8a	4930556C24Rik
Plcxd3	Arsj	Gm32461
Oxct1	LOC100862268	Gm32865
C9	Mir367	N6amt1
Dab2	Pitx2	Ltn1
Ugt3a1	Etnppl	Map3k7cl
Ugt3a2	Rpl34	Gm10789
Il7r	Gimd1	Cntnap5a
Prlr	Scyl3	Scaf4
Agxt2	Tet2	Mis18a
Spef2	Cxxc4	Mir6367
Adamts12	Ppp3ca	Tmem50b
Cdh6	Lamtor3	Atp5o
Cdh9	Stpg2	Kcnj6
Cdh12	Mir7j	Brwd1
Cdh18	Mir6381	Pisd-ps2
Cdh10	Pkn2	Tsn
Hnrnpa1l2-ps2	Ccn1	Ldhal6b
Acot10	2410004B18Rik	Gm29719
Marchf11	Adgrl2	Tagap1
Fbxl7	Mir3963	Rps6ka2
Dnah5	Adgrl4	Unc93a2
Ctnnd2	4930568G15Rik	Qk
Tas2r119	4930482G09Rik	Prkn
Sdc2	St6galnac3	Map3k4
Sema5a	Cryz	Slc22a1
Tspyl5	Tnni3k	Afdn
Cpq	9330178D15Rik	Dact2
1700084J12Rik	4930570G19Rik	Gm5091
Zfpm2	Negr1	4933401D09Rik
Oxr1	Gm20752	Chd1
Angpt1	Depdc1a	Rgmb
Rspo2	Tfap2b	Zfp960
Tmem74	Fam110b	Zfp97
Emc2	Ubxn2b	Gm38396
Trhr	Cyp7a1	Gm6712
Pkhd1l1	Tox	Lix1
A930017M01Rik	Rab2a	Vmn2r90
Csmd3	Ndufaf6	Vmn2r95
Sybu	A530072M11Rik	Vmn2r96
Ebag9	Mmp16	Vmn2r98
Kcnv1	Ccnc	Vmn2r100
Trps1	Gm30731	Vmn2r101
Slc30a8	Epha7	Vmn2r106
Med30	Gm11917	Zfp160
Samd12	Map3k7	Zfp677
Mal2	Bach2os	Zfp53
Ccn3	Ankrd6	Vmn2r111
Tnfrsf11b	Rragd	2900060B14Rik
Enpp2	Gabrr2	Dnase1l2
Colec10	Platr9	Rab26
Col14a1	C9orf72	Tsc2
Sntb1	Gm12374	Noxo1
Has2	Spink4	Mir7216
Slc22a22	Rpp25l	Srsf3
Has2os	Ccin	Pim1
4933412E24Rik	Gm12504	Ccdc167
A1bg	Igfbpl1	Btbd9
Pvt1	Tmem38b	Dnah8
Gsdmc	Zfp462	Tff3
Adcy8	Frrs1l	Sik1
Kcnq3	Palm2	Cyp4f37
Sla	Susd1	Cyp4f15
Tmem71	Mup6	Zfp870
Tg	Rgs3	Kank3
Phf20l1	Akna	3830432H09Rik
Dnaaf11	Whrn	Tcf19
Zfat	Tex48	Trim40
Khdrbs3	Pappa	Mog
Col22a1	Tlr4	Ubd
Fam135b	Gm12911	Olfr126
Syt10	Uap1	Olfr135
Kif21a	Brinp1	Esp23
Spn-ps	Cdk5rap2	Pgk2
Cpne8	Aldoart1	Crisp3
Cntn1	Gm11487	Crisp1
Smgc	A430085M09Rik	Tmem37
Slc2a13	Gm11264	Esp8
Muc19	Sh3gl2	Esp5
Pdzrn4	Saxo1	Crisp2
Abcd2	Dmrta1	Glyatl3
Lrrk2	Zfp352	Mmut
Adamts20	Elavl2	Adgrf2
LOC100043315	Izumo3	Tnfrsf21
Tmem117	Jun	E130008D07Rik
Nell2	9530080O11Rik	Marco
Glycam1	Cyp2j11	Rpl7l1
Or1f19	Dedd	Mrps10
Rbfox1	E130114P18Rik	Taf8
Snai2	Patj	Foxp4
A630010A05Rik	Ube2u	1700008K24Rik
Clxn	Plpp3	Tbc1d5
Lamp3	Ssbp3	Satb1
Or2aj4	Kti12	Gm19585
Or2l13b	Faf1	Gm27217
Or2m12	Bend5	Kcnh8
Or2m13	Skint5	Efhb
Or2l5	Trabd2b	Pp2d1
Or2aj5	Gm12830	Kat2b
Or2aj6	Mmachc	Sult1c2
Or2l13	Rps8	1700025K24Rik
Lpp	Rnf220	St6gal2
Tprg	Artn	Vmac
Tmem207	Ptprf	Acsbg2
Cldn16	Olfr1338	Acer1
Cldn1	Gm12866	Cd70
Il1rap	Slc2a1	Adgre1
P3h2	Kcnq4	Cntnap5c
Trp63	Rims3	Pdzph1
Gm10823	9530002B09Rik	Nudt12
Fgf12	Mir6398	Ddx18
Uts2b	1700057H15Rik	Efna5
Ostn	Maneal	4930405O22Rik
Ccdc50	Mir692-3	Fbxl17
Mir690	Map7d1	Gm28590
Atp13a4	Dlgap3	Fer
Atp13a5	CK137956	AU016765
Plaat1	Trim62	4930583I09Rik
Stxbp5l	C77080	Rab31
Polq	C330020E22Rik	Mtcl1
Lsamp	Serinc2	Dpp10
Ndufs5-ps	Snord85	2410021H03Rik
Zbtb20	Sdc3	Dlgap1
Cd200r4	Ptpru	Mir1195
Cd200r2	Fgr	Myom1
Cd200r1	Ahdc1	Smchd1
Cd200r3	Wasf2	Clip4
Cd200	Kdf1	Alk
Btla	Aim2	Srd5a2
Cd200l1	Clic4	Memo1
Slc9c1	Ifi213	Spast
Atg3	Stpg1	Ltbp1
Phldb2	Srsf10	Fam98a
Plcxd2	Tcea3	Gm4710
Cd96	Hnrnpr	Crim1
Nectin3	Ephb2	Vit
Dzip3	Mir7019	Actr3
Retnlg	Fam43b	Hnrnpll
Retnla	Vwa5b1	Sos1
Retnlb	Pax7	Slc35f5
Trat1	Arhgef10l	Map4k3
Myh15	Rcc2	Tmem178
Dubr	Padi2	Thumpd2
Ccdc54	Arhgef19	Slc8a1
Alcam	Epha2	Gm19689
Cblb	Spen	Kcng3
Zpld1	Fblim1	C430042M11Rik
Tfg	Ifi202b	8430430B14Rik
Impg2	Kazn	4933433H22Rik
Adgrg7	Mir7021	Thada
Abi3bp	Pramel1	Dync2li1
Tmem45a	Olfr419	Camkmt
Senp7	Tnfrsf8	Epas1
Tmem45a2	Gm13212	Stpg4
Col8a1	Zfp980	Epcam
Ftdc1	Znf41-ps	Kcnk12
Or5ac23	Gm13034	Msh6
Or5h25	Zfp600	Gm4832
Or5h23	Zfp991	Foxn2
Or5ac16	Rex2	Ppp1r21
Or5k16	4933438K21Rik	Lhcgr
Or5h18	Zfp979	4933400B14Rik
Or5h19	Zfp534	Gm4719
Or5h22	Mfn2	Nrxn1
Olfr197	Plod1	Gm20491
Or5h17	Grem2	4930480K15Rik
Or5ac21	Casz1	Adcyap1
Or5h26	Eno1	Mettl4
Or5ac24	Ajap1	Gm1976
Or5ac22	Arhgef16	Vmn1r238
Olfr176	Ski	Crem
Or5ac19	Faap20	Mgat5
Or5ac20	Gm13648	Map3k8
Or5k15	Cyp51	Kif5b
Or5k3	Cldn12	4921524L21Rik
Or5k17	Gm36536	Armc4
Or5k1	Adam22	Mpp7
Or5k1b	Abcb1a	Wac
Or5k8	Speer1	Cetn1
Gabrr3	Sema3a	Usp14
Olfr192	Hmga2-ps1	Esco1
Or5ac17	Gm9758	Tmem241
Olfr209	Gm10354	Osbpl1a
Or5ac15	Gm17019	Ccnt2
Nsun3	Gm21190	Aqp4
Epha6	Gm21083	Chst9
Epha3	Speer4d	Cdh2
Pros1	Phtf2	4930545E07Rik
Csnka2ip	Wdr86	Dsc3
Htr1f	Gm10471	Dsg1a
Pou1f1	Catspere1	Dsg1b
Chmp2b	Mrpl33	Dsg3
Speer2	Lrpap1	Mep1b
Cadm2	Afap1	R3hdm1
Vgll3	Bloc1s4	Garem1
Gbe1	Cpeb2	Ccdc178
Robo1	4930405L22Rik	Nol4
Hspa13	Slit2	Mocos
Rbm11	Sepsecs	Tpgs2
Robo2	4930459L07Rik	AW554918
Lipi	4933402J10Rik	Celf4
Mir691	Sccpdh	Dars
Nrip1	Rell1	4930474G06Rik
Samsn1	Tmem33	Pik3c3
Usp25	Kctd8	Rit2
Mir99a	Corin	Syt4
Mirlet7c-1	Kit	Tslp
Mir125b-2	Igfbp7	Camk4
Mir99ahg	Adgrl3	Epb41l4aos
Ncam2	Tecrl	Mzb1
Tmprss15	Epha5	Pfdn1
Chodl	Ythdc1	Thsd7b
App	Ugt2b35	Slc25a2
Cyyr1	Cox18	Gm15674
Adamts5	Shroom3	Pcdhgb5
Grik1	Gm16367	Hdac3
Cldn17	Gm3286	Pcdh1
Krtap24-1	Gk2	Cd55
Krtap27-1	Tmem150c	Yipf5
Cldn8	Sec31a	Kctd16
Krtap26-1	Wdfy3	Sh3rf2
2310079G19Rik	Arhgap24	Ppp2r2b
Gm10229	Lrrc8c	Gm10267
2310034C09Rik	Mtf2	Dcp2
Krtap11-1	Vmn2r14	Eya1
Krtap13	Gm10416	Ythdc2
Krtap6-1	Pus1	Kcnn2
Krtap6-2	Mir701	9130209A04Rik
Krtap8-1	E130006D01Rik	1700044K03Rik
Krtap19-5	Unc119b	Dtwd2
Krtap19-2	Mlec	Hsd17b4
Krtap19-4	Srsf9	Lox
Krtap21-1	Sirt4	Zfp608
Krtap19-1	Gcn1	Prrc1
Krtap19-9b	Med13l	Isoc1
Krtap14	Rasal1	Gm4951
Krtap15	Dtx1	Iigp1
Krtap20-2	Cux2	Slc26a9
Krtap6-5	Pptc7	Pde6a
Krtap22-2	Setd1b	Wdr7
2310057N15Rik	Mlxip	Nars
Krtap7-1	Zfp664	Nedd4l
Krtap16-3	Ncor2	Malt1
Krtap19-3	Tmem132d	Zfp532
Nox3	Piwil1	Grp
Vmn2r90	Rimbp2	Pmaip1
Fpr-rs4	Adgrd1	Cidea
Fpr3	Gm29681	Mc5r
Vmn2r95	Rcc1l	Klhdc8a
Vmn2r92	Gtf2i	Mir145b
Vmn2r93	Mir3965	Tcf4
Vmn2r91	Gtf2ird1	Dynap
Vmn2r94	Wbscr25	Mbd2
Vmn2r104	Vps37d	Dcc
Vmn2r98	Mir7034	Mex3c
Vmn2r102	Upk3b	Cxxc1
Vmn2r96	Rasa4	Pias2
Vmn2r97	Mir7035	A330094K24Rik
Vmn2r100	Polr2j	Epg5
Vmn2r101	Muc3	Gm36718
Vmn2r103	Ache	Pqlc1
Vmn2r99	Ephb4	Sall3
Fpr-rs3	Micall2	Galr1
Vmn1r229	Mad1l1	2210420H20Rik
Vmn1r226	Ttyh3	4930592I03Rik
Vmn1r228	Foxk1	Tshz1
Vmn1r232	Papolb	Zfp407
Vmn1r225	Mmd2	Dipk1c
Vmn1r227	Tnrc18	Gm38576
Vmn1r231	Actb	Fbxo15
Vmn1r230	Pms2	Neto1
Vmn2r107	Tecpr1	Cbln2
Vmn2r106	Nptx2	Socs6
Vmn2r110	Tgfb2	Rttn
Fpr-rs6	Cyp3a41b	Mir6359
Vmn2r105	Wasf3	Cd226
Vmn2r108	Slc46a3	Dok6
Vmn2r109	Mtus2	Gm45871
Vmn1r224	Alox5ap	Cpt1a
Vmn1r233	Gm5	Slc3a2
Vmn1r234	Kl	Snord22
Vmn1r235	Sgce	Fads2
Vmn1r237	1110019D14Rik	Syt7
Vmn1r236	Gm36669	4933406M09Rik
Zfp677	Kcnd2	Ptgdr2
Zfp54	Mir592	Ms4a6d
Zfp948	Snd1	Stx3
Zfp983	Lrrc4	Adipor1
Gm16386	Ccdc136	Mir466f-1
Zfp947	Smkr-ps	Olfr1431
Vmn2r111	Mir335	Cntf
Zfp758	Podxl	Gm44505
Zfp40	Plxna4	Tle4
Zfp945	Gm29678	Psat1
Zfp944	Mtpn	Anxa1
Zfp229	Creb3l2	1500015L24Rik
Vmn2r113	Agk	1110059E24Rik
Vmn2r112	2210010C04Rik	Abhd17b
Vmn2r-ps129	Cntnap2	Cemip2
Zfp942	Gm7932	Klf9
Zfp946	Chn2	Fam189a2
Zfp943	Itprid1	Tjp2
Zfp820	A530053G22Rik	Smarca2
Vmn2r116	Grid2	Rfx3
Vmn2r117	Rpia	Gm9895
Vmn2r115	Tcf7l1	Plgrkt
Vmn2r114	Dnah6	Ermp1
H2-M10.3	Gm31747	Uhrf2
H2-M9	Lrrtm1	Mbl2
H2-M10.4	6330415B21Rik	Cstf2t
H2-M11	Reg3g	Sgms1
H2-M1	Gm20362	Pten
H2-M2	Gm20594	Lipo1
Or12d15	Dctn1	Msc
Or14j4	Mir205	Mir107
Or12d16-ps1	Dysf	Mir1950
Or12d14-ps1	Gm10445	Lgi1
Or14j8	Exoc6b	Slc35g1
Or10al3	Npm3-ps1	Tbc1d12
Or14j9	Nat8f5	Cyp2c29
Or12d2	Klf15	Cyp2c38
Or2g25	4930503O07Rik	Cyp2c39
Or14j3	Trh	Cyp2c67
Or10al6	Prickle2	Cyp2c68
Or14j2	Adamts9	Cyp2c40
Or14j1	Mir7041	Cyp2c69
Or5v1	Mir3962	Cyp2c37
Or14j6	Cd34	Cyp2c50
Or1o11	Mir29b-2	Cyp2c70
Or1o1	Mir6373	Lcor
Or1o4	Pou5f1-rs5	Got1
Or10al5	Cntn4	Kcnip2
Or2g1	Grm7	Trpa1
Or10al4	1700054K19Rik	Trim8
Or14j10	Mthfd1l	Nt5c2
Or12d13	Snora7a	Mir6995
Or12d12	Adipor2	Sorcs1
Or12d17	B4galnt3	1700054A03Rik
Or14j5	Zbtb2	Smc3
Or2b4	M6pr	Adra2a
Or14j7	Dppa3	Adrb1
Or10al2	Nanog	Ablim1
Or5v1b	Slc2a3	Trub1
Esp36	Mlf2	Atrnl1
Esp31	Plekhg6	Mir5623
Esp34	Clec2h	Hspa12a
Esp4	Klra1	Fam204a
Esp8	Klra2	Csf2ra
Esp23	Prb1	Fam171a1
Crisp1	Rgs17	Platr22
Crisp3	Tas2r117	Prpf18
Or2n1e	Oprm1	Mir466d
Pgk2	Gprc5a	Echdc3
Rhag	Slc15a5	Nr5a2
Crisp2	4922502N22Rik	1700061F12Rik
Or2h15	Lrp11	Gm13262
Or10al7	Pde3a	Sfmbt2
Or2n1c	Slco1a5	Rbm17
Or2g7	Gys2	Itga8
Or2j3	Ldhb	Mindy3
Or2n1d	Sult6b2	C1ql3
Or2n1b	Sox5	St8sia6
Or2n1	Tab2	Tmem236
Or2y3	Bcat1	Kcnb2
Esp6	Gm15543	Arl5b
Esp1	Sspn	Malrd1
Opn5	1700049E15Rik	Plxdc2
Adgrf2	Ust	4930515L03Rik
Ptchd4	Resf1	Nebl
Adgrf4	Sash1	Mllt10
Supt3	Mir290a	Dnajc1
Runx2	Cacng7	Mir181a-1
Dazl	Gm36210	Etl4
Satb1	Rasl2-9	Arhgap21
Plcl2	Galp	Mir181b-1
Tbc1d5	Zim3	Gpr158
Kcnh8	Aurkc	Myo3a
Efhb	Vmn2r30	Ptprc
Zfp119a	Vmn2r31	Pdss1
4932415M13Rik	Vmn2r39	Nxph2
Zfp959	Vmn2r49	Hnmt
St6gal2	Vmn1r74	Atp6v1g3
Vmn2r118	Samd5	Pnpla7
Adgre4	Zbtb45	Dipk1b
Slc5a7	Sult2a5	Snora43
Sult1c2	Sult2a2	Nek7
Pot1b	Sult2a1	Fam163b
Efna5	Sult2a3	Mir133c
Adgre1	Nop53	Prrc2b
Vmn2r120	Ehd2	C130021I20Rik
Cntnap5c	Slc1a5	Terf1
Nudt12	Prkd2	Olfr340
Pdzph1	Ptgir	Strbp
Fbxl17	Pnmal2	Nr5a1
Man2a1	Ceacam13	Nr6a1
Tmem232	Adgb	Ppp6c
Ptprm	Pglyrp1	Lrp1b
L3mbtl4	Eml2	Gm34816
Dlgap1	Fosb	Gtdc1
Alk	Ercc1	Zbtb41
Smchd1	Nectin2	Zeb2
Capn13	Grm1	1700019E08Rik
Galnt14	Vmn1r91	F13b
Ltbp1	Vmn1r167	Acvr2a
Gm4710	Zfp428	Kif5c
Slc8a1	Lypd10	Cfhr1
Fshr	Lypd4	Lypd6b
Lhcgr	Rps19	Gm48908
Nrxn1	Arhgef1	Gm13498
Gtf2a1l	Pafah1b3	Gm4788
Adcyap1	Epm2a	1700057H21Rik
Mkx	Nlrp9c	Rif1
Odad2	Gm10046	4930573O16Rik
Mpp7	AF357399	Rprm
Aqp4	1700028B04Rik	Kcnj3
Chst9	Mrps12	Gpd2
Cdh2	Actn4	Cfhr2
Dsc1	Catsperg1	Galnt5
Dsc2	Sipa1l3	Upp2
Dsc3	Zfp74	Ccdc148
Dsg1a	Capns1	5330411J11Rik
Dsg4	Tbcb	Tank
Dsg1c	Aplp1	Psmd14
Dsg1b	Mag	Slc4a10
4921533I20Rik	Hamp2	Gcg
Dtna	Gm10640	Gca
Asxl3	Scgb2b11	Kcnh7
Klhl14	Pdcd2l	Gm8541
Nol4	Kctd15	Kcnt2
Ccdc178	Chst8	Scn2a
Rit2	Utrn	Galnt3
Syt4	Gpatch1	Scn7a
Pcdha1	Slc7a9	Mir7224
Vaultrc5	Tdrd12	Nostrin
Gm37013	Pdcd5	Lrp2
Pcdha4	Zfp507	Slc25a12
Pcdha6	Gm28453	Platr26
Pcdha7	Vmn2r57	4930590L20Rik
Pcdha5	Vmn2r-ps54	Ola1
Pcdha11	Izumo2	4930444P10Rik
Pcdha10	Rcn3	Mtx2
Pcdha9	Hrc	9430019J16Rik
Pcdha3	Hsd17b14	Hnrnpa3
Pcdha12	Grin2d	Osbpl6
Pcdha2	Ldhc	Plekha3
Pcdha8	Mrgpra4	Ttn
Nr3c1	Xkr4	Sestd1
Pabpc2	9130015G15Rik	Zfp385b
Kctd16	Hivep2	Itprid2
Stk32a	Nmbr	Zfp804a
Ppp2r2b	Gm22496	Fsip2
Gm10267	Snord116l1	B3galt2
Scgb3a2	C330004P14Rik	Lrrc55
Npy6r	Mef2a	Olfr996
Dpysl3	Gm5334	Olfr1002
Gm94	4930402F11Rik	Olfr1034
Spink14	Nr2f2	Olfr1045
Spink6	Cited2	Olfr1056
Spink11	Klhl25	Olfr1057
Spink5	Agbl1	Olfr1058
Jakmip2	Nmb	Olfr1065
Spinkl	4933430H16Rik	Olfr1182
Spink12	Abhd17c	Olfr1188
Kcnn2	Zfand6	Olfr1198
Sema6a	Vmn2r74	Olfr1229
Commd10	Vmn2r77	Olfr1238
Gm5095	Vmn2r79	Olfr1245
1700044K03Rik	Tyr	Nup160
Hsd17b4	Rab38	A330069E16Rik
Fam170a	Hikeshi	Ext2
Pudp	Eed	Accsl
Ftmt	E230029C05Rik	Alkbh3
Prr16	Picalm	Hsd17b12
Gykl1	Dlg2	Lrrc4c
Lox	4930567K12Rik	B230118H07Rik
Zfp474	Gm15501	Ldlrad3
Sncaip	Aqp11	Rgs13
1700034E13Rik	Tsku	4930547E08Rik
Gm10536	Gm26705	4931422A03Rik
Marchf3	Chrdl2	Rgs1
Megf10	Ucp2	Cstf3
4930511M06Rik	Fchsd2	Wt1os
C330018D20Rik	Olfr576	Them7
Ctxn3	Olfr667	Rcn1
1700066O22Rik	Olfr710	Elp4
Ccdc192	Ahi1	Dnajc24
Fbn2	Rbmxl2	Mpped2
Slc27a6	Syt9	Arl14ep
Minar2	Olfml1	Kcna4
Gm4841	Olfr506	Rgs18
Adamts19	Eif3f	Mettl15
Gm4951	Tub	Bdnf
F830016B08Rik	Ampd3	Ccdc34
Iigp1	Rnf141	Bbox1
Chsy3	Gm5420	Fibin
Htr4	Dkk3	Olfr1294
Spink13	4933406I18Rik	Olfr1295
Spink10	Sox6	Olfr1305
Spink7	Plekha7	Olfr1312
Piezo2	Tmc5	Brinp3
Mc4r	Gprc5b	Aven
Mc2r	4930505K13Rik	Ryr3
Ccdc68	Otoa	Tmco5b
Dynap	Kdm8	Aqr
Rab27b	Slc2a12	Zfp770
Dcc	1700123J17Rik	Dph6
Setbp1	Mir7058	4930528P14Rik
Slc14a2	Qprt	Mir1951
Cbln2	Zfp553	Spred1
Cd226	Ctf1	Mir674
Rttn	Prss8	4930412B13Rik
Neto1	Fgfr2	Thbs1
Socs6	Tacc2	Pak6
Dok6	Lhpp	Ino80
Slc22a27	Taar2	Wdr76
Slc22a19	Dock1	Casc4
Slc22a26	Insyn2a	Ctdspl2
Slc22a29	Foxi2	Eif3j2
Slc22a30	Ebf3	Ube2w
Slc22a28	Gm12669	Sqor
Plaat5	Eps8l2	Sema6d
Ms4a8a	LOC105243090	4930517E11Rik
Ms4a20	Zfp958	Myef2
Ms4a19	Slc10a2	Slc12a1
Ms4a13	Efnb2	Hdc
Ms4a7	Akap7	Pla2g4a
Ms4a2	Myom2	Spdye4c
Cblif	Mir3106	Vinac1
Ms4a3	4930467E23Rik	AI847159
Oosp1	Gm21119	Il1a
Oosp2	1700047A11Rik	Stk35os1
Oosp3	Ptprk	Cdc25b
Ms4a4b	Gm3985	Cds2
Ms4a4c	Themis	Shld1
Ms4a4d	Triml1	Mir3090
Gm8369	Rspo3	Hao1
Ms4a6d	Gm13363	Ptgs2
Ms4a6b	Il15	Plcb1
Ms4a6c	Sult3a1	4930545L23Rik
Or5an1b	Nt5dc1	9630028H03Rik
Or5an9	Frk	Lamp5
Or4d6	A330008L17Rik	Jag1
Or4z4	1600027J07Rik	Btbd3
Or5a1	Tle7	Mir1952
Or5an6	Calb2	Pdc
Or5an1	Cntnap4	Ism1
Or5an11	Gcsh	Odr4
Or5an10	Khdrbs2	Sel1l2
Or5an1c	6030466F02Rik	Flrt3
Or4d10c	Sipa1l2	Prg4
Glyat	Fam229b	Kif16b
Gm4952	Mir21c	Dstn
Or5b94	Gucy1a2	Hmcn1
Or5b95	Aasdhppt	Gm14092
Keg1	Msantd4	Crnkl1
Or9q1	Dcun1d5	Cfap61
Or10w1	Mmp20	Insm1
Or5b109	Arhgap42	Ralgapa2
Or5b111	Cntn5	Ly96
Or5b118	Maml2	C730036E19Rik
Or9i1b	Chordc1	Kiz
Or5b116	Olfr24	AI646519
Or5b122	Zfp846	Nxt1
Or5b119	Mir199a-1	Cst3
Or5b107	Kank2	Cst10
Or5b24	Eepd1	Syndig1
Or10q12	Igsf9b	Ivns1abp
Or10q1b	Ntm	Zfp120
Or5b98	Kcnj1	E130215H24Rik
Or5b104	Ets1	Gins1
Or9i2	Kirrel3	Mir1953
Or9i16	Fez1	Tcf15
Or5b124	Siae	Defb23
Or5b123	Olfr901	Defb36
Or5b106	Olfr972	Commd7
Or5b117	Tmem225	Bpifa3
Or5b113	Hspa8	Cbfa2t2
Or5b102	Grik4	Edem3
Or5b108	Bcl9l	Eif2s2
Or5b112	Apoa1	Manbal
Or5b3	4931429L15Rik	Blcap
Or5b120	Gm10677	Dhx35
Or5b12b	Ncam1	4933416E03Rik
Or5b101	Pdss2	Chd6
Or5b12	4930563M21Rik	Ptprtos
Or5b21	Cd24a	Ptprt
Or5b97	Cyp11a1	L3mbtl1
Or5b96	Ccdc33	Mir7003
Or5b99	Mir6385	Ncf2
Or9q2	Pkm	Pigt
Or9i14	4933433G08Rik	Eppin
Or9i1	B930092H01Rik	Zfp335
Or1s2	Tle3	Zmynd8
Or10q1	Coro2b	Sulf2
Or5b121	Cln6	Stau1
Gm5512	Smad6	Snord12
Pcsk5	Atg5	Slc9a8
Aldh1a1	Parp16	Ube2v1
Tmc1	Oaz2	Ptpn1
Anxa1	Mir190a	Tshz2
Trpm6	Mir1929	Gm17619
Rorb	Tcf12	Dok5
Aldh1a7	Prtg	1700028P15Rik
E030003E18Rik	Pygo1	Mc3r
Gda	Hmgcll1	Tfap2c
Zfand5	Senp6	Rbm38
Trpm3	D430036J16Rik	Zbp1
Mir204	Irak1bp1	Vapb
Snora19	Ube2cbp	Gdap1
Rfx3	Snord14d	Gnas
Prkg1	Tbc1d2b	Gm14393
Gm6642	Zic4	Zfp966
Asah2	1700034K08Rik	Npl
A1cf	Trim42	Gm2004
8430431K14Rik	4921534H16Rik	Zfp970
Lipo3	Slc35g2	Gm14322
Rnls	Pccb	Zfp972
Lipk	Msl2	Zfp931
Ankrd22	Mir7243	Phactr3
Lipf	Ephb1	Cdh26
Lipn	Amotl2	4930591A17Rik
Lipm	Ryk	Stmn3
Fas	Slco2a1	Hnf4g
Ifit2	Cdv3	1110015O18Rik
Ifit3	4932413F04Rik	Pex2
Ifit3b	Ackr4	1700008P02Rik
Ifit1bl1	Mir2136	Pkia
Slc16a12	Grik2	Zc2hc1a
Htr7	Rrp9	Il7
Hectd2	Iqcf1	1700010I02Rik
Hectd2os	Gnat1	Cacna1e
Cyp2c69	Traip	Stmn2
Cyp2c50	1700102P08Rik	Mrps28
Cyp2c29	Celsr3	Tpd52
Cyp2c37	Fbxw21	Zbtb10
Cyp2c38	Fbxw15	C030034L19Rik
Cyp2c39	Ascc3	Zfp704
Cyp2c40	Als2cl	Snx16
Cyp2c70	Tdgf1	Gm10745
Cyp2c54	Mlh1	Ralyl
Cyp2c68	Trank1	Gm6300
Cyp2c67	Dclk3	A930001A20Rik
Cyp2c53-ps	Mir128-2	Ythdf3
Cyp2c66	2900079G21Rik	BC034090
Cyp2c55	Pdcd6ip	Gm30223
Cyp2c65	Gadl1	Mir124-2hg
Hpse2	Golga4	Cypt12
Sorcs3	Acvr2b	4930433B08Rik
Ins1	Vgll2	Dnajc5b
Sorcs1	Scn11a	Agtr1b
Rab11fip2	Wdr48	Tbl1xr1
Grk5	Eif1b	Rprl2
Celf2	5830454E08Rik	Naaladl2
5031426D15Rik	1700020M21Rik	Ect2
Mir467d	Mir7090	Mir3092
Mir297a-3	Trak1	Fndc3b
Mir466g	1700048O20Rik	Slc2a2
Mir669k	Lars2	Rpl22l1
Mir669i	Tfe3	Gm1527
Mir669j	Glod5	Egfem1
Mir669g	Xk	Prkci
Mir669e	Med14	Mir7008
Mir669h	Araf	Skil
Mir669m-2	Ppp1r2-ps7	Tdrd5
Mir466o	Mcts1	Ndufb5
Mir669p-2	Gria3	Ttc14
Mir669p-1	Dcaf12l1	Ccdc39
Mir467a-7	Apln	Gm38509
Sfmbt2	Msl3l2	Mccc1os
Mir466	Fmr1os	4932438A13Rik
Mir669b	Pnma5	1700017G19Rik
Mir669a-1	Plxnb3	Tor3a
Mir467b	Mir7091	Plk4
Mir669a-2	Gm36595	Pgrmc2
Mir669a-3	Eif2s3x	Jade1
Mir669c	Amer1	Sclt1
Mir297b	Heph	2610316D01Rik
Prkcq	Gm14853	Pabpc4l
Pter	4933401B06Rik	Mir6379
Rsu1	Pou3f4	Gm7977
C1ql3	Cpxcr1	1700018B24Rik
Itga8	H2afb1	Pcdh18
Mindy3	Tgif2lx2	Noct
Cubn	Astx5	Pi15
St8sia6	Diaph2	Mgst2
Hacd1	Gm26851	Frem2
Mir511	Gm17059	Ufm1
Cacnb2	Mir680-2	Sertm1
Mrc1	Dnajb12	Tm4sf1
Slc39a12	Phf8	Wwtr1
Tmem236	Foxr2	Ankub1
Plxdc2	Ddit4	Rasal2
Nebl	Prdx4	Cryzl2
Nsun6	Dst	Serp1
Arl5b	Bclaf3	Selenot
Armc3	Mir3473a	Gm5538
Etl4	Glra2	Gm8298
Gpr158	Cdh23	Sucnr1
Myo3a	Gm1720	Sec16b
Gad2	Frmpd4	Mbnl1
Apbb1ip	Gm15246	Rap2b
Hnmt	Mid1	Arhgef26
Il1rn	Uty	Gpr149
Nxph2	Pcbd1	Mme
Il36g	Adamts14	Strit1
Il1f10	H2afy2	Vmn2r2
Tbpl2	Oprk1	Vmn2r3
Il36a	Mypn	Mfsd1
Il36rn	Dnajc12	Schip1
Il36b	Ctnna3	1110032F04Rik
Potegl	Gm28881	Gm6634
Spopl	Jmjd1c	Sis
Or1j1	Rtkn2	Gm20754
Or1j21		4930509J09Rik
Or12k5		Bche
Or1af1		Gm20356
Or12k8		Zbbx
Or5c1		Serpini2
Or12k7		Mir488
Or1q1		Platr10
Or1ak2		Fstl5
Or1l8		Rapgef2
Or1j4		Pappa2
Or1j15		4921511C10Rik
Or1l4		Gm17359
Or1j17		4930579G24Rik
Or1n2		Pdgfc
Or1j20		Map9
Or1n1b		Pou5f1-rs1
Or1n1		Tlr2
Or1j18		Tmem131l
Or1j19		Fbxw7
Or1j16		1700036G14Rik
Or1j10		Mab21l2
Or1j14		Dclk2
Or1j11		Isg20l2
Or1j13		Ssr2
Or1j12		Il6ra
Or1b1		Rab13
Or7c74		Mir7012
Kynu		Ints3
Arhgap15		Pglyrp3
Lrp1b		Lor
Gtdc1		Prr9
Mbd5		Sprr2a2
Lypd6		Sprr2a1
Lypd6b		Sprr2a3
Gm13498		Sprr2b
Tas2r134		Gm4858
Kcnj3		Crnn
Galnt13		Hrnr
Cytip		Mir5124a
Galnt5		Tdpoz2
Acvr1c		Tdpoz1
Ermn		Tdpoz3
Tank		Gm10697
Dpp4		Gm10696
Fap		Selenbp1
Gcg		Setdb1
Ifih1		Mcl1
Slc4a10		Rabgap1l
Kcnh7		Vps45
Gca		Otud7b
Cobll1		Fcgr1
Slc38a11		Gm15441
Grb14		Olfr1402
Fign		Chd1l
Scn3a		Rc3h1
Gm13629		Notch2
Scn2a		Hsd3b4
Galnt3		Gm12440
Scn1a		Spag17
Scn7a		Wdr3
Scn9a		Trim45
Xirp2		Tex50
B3galt1		Ptgfrn
Gm1322		Cd2
Ttc21b		Mrpl15
Csrnp3		Casq2
Stk39		Vangl1
4933409G03Rik		Tspan2
4932414N04Rik		Ampd1
Pde11a		Dennd2c
Zfp385b		Bcas2
Cwc22		Syt6
Ube2e3		Chil5
Gm14461		Chil4
Itga4		Olfr266
Cerkl		Defb18
Pde1a		Wdr47
Prdx6b		Prpf38b
Itprid2		Ntng1
Ppp1r1c		Gm6602
Zfp804a		Rnpc3
Fam171b		Col11a1
Gm13695		Olfm3
Calcrl		S1pr1
Gm13698		A930005H10Rik
Gm13697		Mfsd14a
Zswim2		1700061I17Rik
Prg2		Plppr4
Prg3		Snx7
Or8u8		Mir137
Fads2b		Dpyd
Or5t17		Ptbp2
Aplnr		6530403H02Rik
Lrrc55		Rwdd3
Or10ag54		Defb41
Or8k28		Cnn3
Or5g23		Slc44a3
Or5m12		Abcd3
Or5t18		Mir760
Or9g20		Snora24
Or5m8		Tram1l1
Or8k39		1700003H04Rik
Or5m11		Ndst4
Or5al1		Ugt8a
Or5al5		Arsj
Or5ak4		LOC100862268
Or8k21		Mir367
Or5be3		D030025E07Rik
Or5m11b		Pitx2
Or5ak20		Egf
Or5m9		Mettl11b
Or8k37		Etnppl
Or5m9b		Lef1
Or9g10		Sgms2
Or10ag53		Dkk2
Or12e9		Ppa2
Or10ag2		Tet2
Or5t9		Cxxc4
Or5t5		Mir1895
Or8k24		Cenpe
Or8k41		Slc9b2
Or8k30		Slc9b1
Or8k32		Ube2d3
Or8k27		Manba
Or8k33		Selp
Or5ak24		Bank1
Or5ak25		Gm4861
Or5ak23		Ddit4l
Or5g29		Ccdc181
Or5g27		Rap1gds1
Or9g3		Nme7
Or9g8		Stpg2
Or9g4		Mir7j
Or9g4b		Pdha2
Or5g9		Unc5c
Or5g25		Pdlim5
Or5al7		Tfap2d
Or5m3b		A830019L24Rik
Or5m3		Gm6260
Or5ap2		Hs2st1
Or8k1		Selenof
Or5m13b		Sh3glb1
Or2ah1		Ccn1
Or5m10		Syde2
Or5m5		Gm10636
Or5m10b		Rpf1
Or8k38		Adgrl2
Or5t16		Mir3963
Or5t7		Gipc2
Or5as1		Fubp1
Or8h10		Miga1
Or12e1		Zzz3
Or5t15		AI115009
Or5j1		4930482G09Rik
Or9g19		Gpr161
Or5aq6		St6galnac3
Or8i2		Msh4
Or8h9		Snord45b
Or5aq1		Cryz
Or5aq7		Erich3
Or12e7		9330178D15Rik
Or8h7		4930570G19Rik
Or5aq1b		4930592C13Rik
Or8h8		Ptger3
Or8k3b		Cth
Or8k40		Lrrc40
Or5ak22		Lrrc7
Or8k16		Gm20752
Or5j3		Depdc1a
Or8u9		Rpe65
Or8k3		Vmn1r2
Or8u3-ps		Vmn1r3
Or8k17		Mir3471-2
Or5ar1		Penk
Or8k18		Gm11780
Or8j3		Fam110b
Or8k23		Ubxn2b
Or8k22		Cyp7a1
Or8k25		Pou2f1
Or8k53		Tox
Or10ag58		Tfap2b
Or12e8		Dusp27
Or10ag57		Plekhf2
Or8j3c		Triqk
Or8u10		Runx1t1
Or5g26		Slc26a7
Or5al6		Tada1
Or8k20		A530072M11Rik
Or8j3b		Mmp16
Or8k36-ps1		Atp6v0d2
Or10ag52		Nkain3
Or10ag56		Faxc
Or8k35		Mms22l
Or8k31-ps1		Ndufaf4
Or5d18		Ufl1
Or5d47		Fut9
Or4b1d		Manea
Or4c58		Uck2
Or4a67		4930548K13Rik
Or4c15b		Epha7
Or4a76		Gm11917
Or4c15		4930556G01Rik
Or4p20		Pm20d2
Or5w14		Srsf12
Or5w19		Pnrc1
Or5d14		Rngtt
Or10ag59		Spaca1
Or4p21		Akirin2
Or4c117		Zfp292
Or4p7		Platr9
Or4c3		Lingo2
Or12e13		Mir876
Or4c107		Gm12374
Or5w18		Gm12381
Or5d39		1700009N14Rik
Or12e10		Aco1
Or4c124		Lrrc52
Or4x13		Dnaja1
Or4c12		Spink4
Or4x6		Ubap2
Or4x11		Olfr29-ps1
Or5w1b		Ccin
Or4a80		Gm12504
Or4c1		Lmx1a
Or4a69		Pbx1
Or4c104		Plppr1
Or4c110		Acnat2
Or4c29		Baat
Or4c105		C630028M04Rik
Or4c106		Olfr275
Or4a66		Olfr270
Or4c126		Slc44a1
Or4a81		Tmem38b
Or4c31		Zfp462
Or4c100		Rad23b
Or5d40		Gm12505
Or5d41		Klf4
Olfr1141		Ctnnal1
Or5w8		Tmem245
Or5w15		Pakap
Or5w20		Gng10
Or5d37		Ptbp3
Or5w16		E130308A19Rik
Or5d16		Slc46a2
Or5d36		Mup17
Or9m2		Mup20
Or5i1		Mup3
Or9m1		Zfp37
Or5d20-ps1		Cdc26
Or9m1b		Zfp618
Or5d38		Akna
Or5w11		Pappa
Or5w13		Trim32
Or5w12		Astn2
Or4c103		Gm12911
Or5d46		Cdk5rap2
Or4c102		Megf9
Or4p8		Tle1
Or4a72		Gm11487
Or4c123		Gm11236
Or4a39		Frmd3
Or4a75		Kdm4c
Or4a73		Dmac1
Or4b12		Ptprd
Or4c52		Tyrp1
Or4a68		Lurap1l
Or5l13		Mpdz
Or4c113		Nfib
Or4p22		Zdhhc21
Or8w1		Ccdc171
Or10ag60		6030471H07Rik
Or5d35		Bnc2
Or5l14		Sh3gl2
Or4c120		Adamtsl1
Or4c118		Saxo1
Or4c111		Plin2
Or4c11		Slc24a2
Or4c11b		Mllt3
Or4c11c		Hacd4
Or4c109		Gm12633
Or4c108		Elavl2
Or4c114		Izumo3
Or4c115		Tusc1
Or4c112		Caap1
Or4c116		Eqtn
Or4p18		Fggy
Or4p19		9530080O11Rik
Or4c101		Cyp2j13
Or4a77		Cyp2j12
Or4a74		Cyp2j11
Or4c121		Gm12695
Or4a70		L1td1
Or4a71		Ror1
Or4a2		Ube2u
Or4c122		Dnajc6
Or4c125		Sgip1
Or4a15		Tctex1d1
Or4c127		F11r
Or4b1c		Insl5
Or4c12b		Gm12718
Or4c10		Dab1
Or4b1b		Lexm
Or4c35		Zfyve9
Or4c10b		Nrd1
Or4a47		Mir761
[truncated: 2,410 more rows]

## Sheet: Extended Data Fig.2d
Extended Data Fig.2d
Relative mRNA expression
	Control				Lmna G609G/+				Lmna G609G/G609G
Cth	1.01	1.02	0.98	1.01	0.54	0.43	0.67	0.52	0.31	0.38	0.25	0.17
Cbs	1.02	1.15	0.85	1	0.58	0.69	0.43	0.47	0.31	0.37	0.58	0.4

## Sheet: Extended Data Fig.2e
Extended Data Fig.2e
Relative protein fold change
	Control				Lmna G609G/+				Lmna G609G/G609G
CTH	1	1	1	1	0.659644	0.714033	0.641911	0.709065	0.434867	0.403435	0.450794	0.448229
CBS	1	1	1	1	0.664137	0.630877	0.831201	0.62905	0.634572	0.44423	0.617343	0.40759

## Sheet: Extended Data Fig.2g
Extended Data Fig.2g: ChIP-qPCR analysis of SP1 enrichment at Cth and Cbs gene promoter region in control and Lmna G609G/G609G mESCs
	Control				Lmna G609G/G609G
Cth promoter	3.42433	2.27971	2.18519	2.40359	0.796409	0.437051	0.966927	0.668477
Cbs promoter	1.78384	1.77137	1.9635	1.12839	0.258083	0.240967	0.341786	0.154854
Negtive control	0.327608	0.143672	0.040418	0.14241	0.14841	0.11445	0.152091	0.28968

## Sheet: Extended Data Fig.2h
Extended Data Fig.2h: H3K27me3 enrichment in Lmna+/+ and Lmna G609g/G609G mESCs (% of input)
	H3K27me3 enrichment in Lmna+/+ and Lmna G609g/G609G mESCs (fold change)
	Lmna+/+				Lmna G609G/G609G
Cbs	1.10947	1.02974	0.860781		5.59349	4.45271	4.89665
Cth	0.646508	1.22716	1.12634		6.24197	8.47071	5.8764
	LaminA/C enrichment in Lmna+/+ and Lmna G609g/G609G mESCs (fold change)
	Lmna+/+				Lmna G609G/G609G
Cbs	0.936577	0.789728	1.2737		4.04513	3.63655	4.57342
Cth	1.45195	0.68913	0.858921		2.16712	1.39023	2.32297
