# Supplementary material for: Lamin A/C-regulated cysteine catabolic flux modulates stem cell fate through epigenome reprogramming
Source: Springer Nature journal article supplement (doi:10.1038/s42255-025-01443-2), 2026-01-28
Supplement: MOESM26 [file 42255_2025_1443_MOESM26_ESM.xlsx]

## Sheet: Extended Data Fig.3a
Extended Data Fig.3a: Metabolites detected by LC-MS/MS based untargeted metabolomics in naïve mESC and D3 EBs
Metabolites	ES WT	ES WT	ES WT	ES WT	ES WT	ES WT	D3 EBs	D3 EBs	D3 EBs	D3 EBs	D3 EBs	D3 EBs
Glucose	53.4242	64.6933	65.4565	301.351	574.953	431.736	403.23	59.3373	67.4314	217.577	162.944	198.877
Fructose	51.0642	57.6354	80.1356	113.164	165.955	156.671	64.0517	148.391	123.795	67.9542	74.0276	70.113
Glucose_6P	55.6454	66.0658	83.5931	115.018	179.732	138.312	75.0911	110.301	101.854	83.1875	79.546	80.5361
D_gluconic_acid	24.5687	34.6866	28.6066	31.0894	45.9206	37.6592	48.3318	53.1304	47.7177	52.0547	35.4039	30.9509
Gluconic acid_6P	295.185	414.623	806.163	665.314	482.663	727.768	176.312	220.736	283.279	341.817	641.439	512.99
Galactose_6P	133.778	173.693	305.688	244.466	156.602	253.51	200.959	263.887	298.204	192.385	272.04	186.88
Ribose_5P	444.473	615.164	1168.81	762.223	547.55	745.509	737.802	858.266	891.383	628.28	915.449	654.153
Ribulose_5P	580.005	888.292	1637.29	1081.73	850.762	1139.86	1021.29	1212.5	1211.19	908.365	1425.12	1027.47
Sedoheptulose_7P	42.3418	56.6396	111.765	62.6474	48.242	76.4574	168.77	124.907	118.997	43.6141	58.1051	46.9967
Erythrose_4P	0	0	0	0	0	0	220.262	394.272	314.352	0	0	0
Fructose_6P	122.235	151.489	292.928	208.821	158.092	286.395	217.23	313.764	345.138	181.468	288.803	194.728
Aldopedose	0	0	0	57799	85023.3	76791.3	0	0	74611.3	10452.3	17059.8	13427.8
Pyruvate	45.485	47.3575	45.7714	64.7634	97.9126	34.6496	63.721	73.0059	74.4788	196.759	151.042	106.615
Lactate	67.0345	69.2453	70.2779	105.348	129.568	85.3895	145.951	148.145	125.438	213.629	234.202	188.396
Fumarate	6.41903	7.87433	7.31575	9.08506	11.3771	7.18788	19.3024	17.3233	15.8785	18.4815	17.4108	14.5264
Succinate	8.78188	8.6027	7.74695	16.1996	28.4154	24.2625	22.3089	22.5369	22.3759	30.5731	31.0379	34.6018
Aspartate	102.477	126.125	109.744	120.056	175.82	126.97	227.688	207.439	206.379	308.422	272.252	235.089
Malate	114.336	160.221	141.1	233.588	321.372	187.924	237.013	223.997	206.872	321.514	312.974	287.482
aKetogluterate	9.66241	12.0353	13.0139	19.6662	25.6259	13.8206	10.5014	11.016	8.86259	26.3062	37.5159	32.473
Citrate	37.437	46.7207	43.8591	23.8235	54.4876	34.0113	11.4147	9.69341	7.89671	6.78134	14.6787	8.99334
Isocitrate	1.46764	1.88689	1.87267	1.16468	1.96302	1.4045	0.0996078	0.0720723	0.0521315	0.170672	0.323417	0.28799
2HG	0.466609	0.490947	0.405279	0.58492	0.976766	0.733409	0.434156	0.425052	0.342238	0.442596	0.504916	0.382688
methylcitrate	0.017839	0.0776167	0.0577612	0.0251883	0.0386464	0.0193784	0.0256976	0.0427609	0.0403536	0.0122071	0.016924	0.0129992
cis_aconiti_ acid	3.73606	4.80531	5.71317	3.66824	5.23867	0	1.55857	1.41433	1.20176	0	0	0
Itaconate	17.5061	20.0015	17.9114	39.0985	56.7069	38.45	17.228	16.3257	14.5679	31.3109	33.8642	32.0728
methyl_malonic_acid	3.69904	2.41944	2.28805	1.74522	2.00483	1.25239	4.41996	4.87265	5.23735	7.57983	6.33752	7.15873
trans_aconitic_acid	14.3623	15.3739	16.847	9.36179	16.8543	10.4473	3.44783	3.91558	3.56126	1.28568	2.50346	2.03002
Glutamine	2214.53	1370.14	2100.96	1969.44	1180.36	1683.85	1991.4	2367.95	3015.49	3332.82	5903.61	5617.54
Glutamate	12336.9	8305.28	13857.8	10481.5	6717.89	8123.7	13816.9	15100.8	19895.6	13079.1	20887.8	20454.4
Proline	1845.27	917.898	1575.12	1227.11	785.602	1033.75	1930.53	2111.56	2740.54	1753.88	2942.14	3132.19
GPR	3.3759	0.351444	0.520501	0.62337	0.288697	0.439277	3.49812	4.25936	4.87944	1.85253	2.82527	4.14198
Serine	2807.93	1482.67	2151.04	1738.69	1088.98	1399.76	2610.37	3245.29	4320.75	3755.95	6471.4	7130.41
Glycine	1787.76	905.272	1373.03	1137.56	686.962	850.356	1859.6	2237.91	2869.72	2901.68	5089.54	5777.05
Methionine	501.466	285.68	497.2	373.772	261.228	339.982	554.102	614.976	805.931	405.923	637.596	700.528
Cysteine	2.05351	7.67027	6.53795	6.4204	6.67624	7.66603	2015.66	2177.37	2932.8	2623.02	2643.79	2897.18
Cystathionine	115.742	116.094	247.599	168.675	123.176	163.057	1084.68	1188.37	1621.61	1399.64	2296.28	2194.71
Cystine	25.1155	33.001	56.1208	47.4628	35.8453	38.6087	54.0783	38.4633	61.1239	34.4058	68.3176	31.232
Homocysteine	55.9387	142.73	184.313	174.798	133.716	176.296	676.538	1056.3	1279.22	484.684	1403.13	1222.24
Arginine	830.955	164.818	285.416	257.345	151.394	195.463	1124.69	1310.48	1773.79	638.827	995.803	1373.57
Citrulline	4.60467	0.522942	0.888086	0.753063	1.38413	0.948345	5.95813	9.00207	14.6027	3.06175	6.00957	6.33466
Ornithine	7.23189	11.5444	19.1221	17.2957	13.5031	18.5442	10.9183	12.7453	35.562	10.5	22.0132	8.39097
Asparagine	1437.88	570.726	860.354	617.22	376.773	499.323	1620.8	2030.1	2507.09	1565.65	2227.28	2816.22
Hypoxanthine	382.041	86.5326	130.619	104.462	57.8058	73.4204	275.074	347.39	440.571	254.584	438.865	649.59
Threonine	1895.12	735.479	933.546	813.746	454.478	585.656	1905.35	2339.9	3010.19	2316.87	3831.63	4403.31
1MHIS	3.99428	1.70444	2.32126	2.0497	1.36122	1.78279	4.16993	5.1894	7.00505	2.38668	4.99551	5.92323
PHP	2.24657	1.30796	1.94639	1.75267	1.26118	1.74125	1.65706	2.30699	3.07455	1.35272	2.43029	3.86282
Alanine	3819.82	2436.35	4359.01	3108.14	2064	2844.13	4226.61	4606.54	6142.56	4347.04	7225.54	7275.61
GABA	396.154	53.6949	87.8609	84.0577	61.4667	66.253	188.093	193.839	276.06	161.734	169.291	336.824
Lysine	1455.44	366.295	689.77	602.835	364.801	471.576	1608.93	1720.13	2224.75	1183.69	1854.59	1950.73
Aspartate	3798.98	2378.51	4097.5	2336.16	1221.82	1495.33	4219.81	4587.24	5814.48	3861.04	6096.57	6477.05
Histidine	461.063	88.4987	140.584	113.502	54.8679	76.5966	582.532	630.516	819.713	270.109	440.872	550.225
TPR	21.3169	11.2265	18.0667	14.6803	10.4391	12.1652	21.1318	22.6673	30.7475	15.2666	25.6308	26.0135
Valine	3671.89	1031.47	1701.48	1390.33	944.984	1488.22	4549.89	5111.89	6574.34	2840.67	4612.8	4973.72
Tryptophane	172.251	35.8716	61.7431	46.668	26.1314	36.3478	218.582	236.033	282.879	85.4681	132.632	165.642
aminoadipicacid	3.93629	2.62489	4.47344	1.99858	1.26079	1.65465	5.03728	5.47894	7.39066	2.40052	3.62037	3.77887
Leucine	1110.03	855.928	1525.85	1206.05	873.576	1154.06	1038.08	1160.02	1593.85	1181.23	1914.05	2007.65
Phenylalanine	592.699	227.45	371.366	262.116	162.827	208.704	593.195	672.111	919.661	494.963	769.389	1004.1
aminopimelicacid	0.584827	0.183974	0.278976	0	0	0	0.381924	0.40532	0.599678	0.317321	0	0.742885
Sarcosine	4714.36	2591.29	4480.13	3043.44	2017.69	2718.26	5352.16	5922.74	7801.76	4666.59	7720.39	8158.69
Isoleucine	1284.53	1235.87	2223.18	1786.06	1297.3	1714.5	1130.89	1232.58	1680.82	1471.4	2407.98	2291.06

## Sheet: Extended Data Fig.3b
Extended Data Fig.3b:Metabolites detected by LC-MS/MS based untargeted metabolomics in naïve mESC, D3, D6 and D10 Ebs
	Naïve mESC						Germ layers (D3 EBs)						Progenitors (D6 EBs)			Differentiated progeny (D10 EBs)
Methionine	501.466	285.68	497.2	373.772	261.228	339.982	554.102	614.976	805.931	405.923	637.596	700.528	510.977	424.853	508.807	374.836	423.297	390.008
Homocysteine	55.9387	142.73	184.313	174.798	133.716	176.296	676.538	1056.3	1279.22	484.684	1403.13	1222.24	208.973	439.616	556.695	304.993	261.71	439.196
Cystathionine	115.742	116.094	247.599	168.675	123.176	163.057	1084.68	1188.37	1621.61	1399.64	2296.28	2194.71	1419.82	1446.58	1501.78	1259.37	1325.31	1218.35
Cysteine	2.05351	7.67027	6.53795	6.4204	6.67624	7.66603	2015.66	2177.37	2932.8	2623.02	2643.79	2897.18	1271.82	1158.61	1650.27	1352.94	1355.7	1450.92

## Sheet: Extended Data Fig.3d
Extended Data Fig.3d:Relative cysteine levels of mESC cultured in naïve and primed conditions
KOSR+LIF	15%FCS+LIF	BMP4/LIF	Activin + bFGF
1.01	1.1214	9.3214	25.42
0.98524	1.7142	12.321	23
1.2351	1.3123	18.25	18.62
0.8421	1.621	16.254	20

## Sheet: Extended Data Fig.3e
Extended Data Fig.3e: Relative cysteine levels in H1 hESC cultured in naïve and primed conditions
H1/2i+FGF	H1/FGF
1.18203	6.57923
0.733804	6.92907
1.13721	7.06038
1.09422	7.19115
1.05514	11.4971
0.797591	8.84404

## Sheet: Extended Data Fig.3g
Extended Data Fig.3g: Percentage of NANOG high cells determined by FACS
shCtrl	shCtrl Lmna-/-	shCbs WT	shCbs Lmna-/-	shCth WT	shCth Lmna-/-	CBS OE	CTH OE
49.48	10.16	76.44	46.49	71.45	43.86	27.54	27.28
47.15	9.61	62.91	47.27	65.31	44.29	31.47	25.3
47.57	10.61	72.97	43.94	66.74	45.6	29.02	34.55

## Sheet: Extended Data Fig.3h
Extended Data Fig.3h: Percentage of OCT4 high cells determined by FACS
+Cys	-Cys	-Cys+AOAA
50.31	76.01	79.3
50.65	69.33	83.91
46.78	62.77	73.92
51.56	61.49	66.68

## Sheet: Extended Data Fig.3k
Extended Data Fig.3k:Relative change in Cth and Cbs mRNA expression as well as cysteine levels 6 hours after doxycycline treatment
	0h				6h
Cth	1.01	0.92	0.91	1.08	0.56	0.68	0.53	0.51
Cbs	1	0.85	1.24	1.02	0.79	0.73	0.54	0.85
Relative fold change of cysteine level	1.01517	0.958139	0.95951	1.06718	0.352201	0.286244	0.462947	0.256691

## Sheet: Extended Data Fig.3l
Extended Data Fig.3l: Quantification of CBS, CTH and total Lamin A/C fluorescence intensity at 0, 6, 8, 12, and 24 hours after treatment with 1 μg/mL doxycycline in wild-type (WT) murine E14-NKX2-5-EmGFP mESCs overexpressing pLenti CMV TRE3G Neo GFP-Lamin A plasmid
CTH Fluorescence intensity(a.u.)					CBS Fluorescence intensity(a.u.)					Lamoin A/C Fluorescence intensity(a.u.)
0h	6h	8h	12h	24h	0h	6h	8h	12h	24h	0h	6h	8h	12h	24h
29.2882	14.1102	10.0626	7.80133	8.50572	15.393	11.3658	7.83469	12.2105	11.7009	14.975	7.507	8.917	23.496	33.193
32.6138	12.797	9.86327	5.64544	5.09376	14.6352	14.7865	12.7139	9.59914	13.2167	14.887	5.976	8.722	7.476	29.118
35.6785	19.6973	7.14741	9.40529	7.64518	20.227	9.47803	10.6811	14.1601	10.4401	14.182	2.957	12.624	8.613	28.928
41.6276	12.1918	5.68055	8.78247	8.41778	21.4224	15.2403	6.99393	10.3339	6.78538	14.027	5.247	4.823	11.012	28.723
46.0476	15.6953	5.79162	6.45433	6.33108	15.0168	21.7928	20.2539	7.28779	10.4525	13.836	6.284	14.712	14.79	26.711
47.9626	15.2231	7.0937	6.31926	13.2291	22.2531	12.4096	20.416	11.0547	8.98361	13.763	8.462	18.213	17.946	26.552
27.5684	12.4781	17.5268	6.19127	9.60422	11.1135	14.1578	10.0214	7.46801	7.56563	13.742	10.493	22.487	34.577	25.937
22.8198	16.0709	7.43027	5.79882	7.31621	12.3693	10.8238	9.18701	9.89086	8.31986	13.667	11.28	17.355	24.419	25.92
30.187	17.9091	5.36931	6.4263	5.37193	16.6372	16.261	9.02571	9.27357	8.06969	13.559	1.654	21.439	7.89	23.27
16.9717	18.0926	3.38155	8.32739	5.64783	14.895	7.4679	13.6617	6.29347	8.47635	13.307	2.497	12.074	20.512	22.746
35.4764	14.7496	10.0822	6.7498	4.1039	25.7508	18.2614	8.26398	9.2122	6.85467	13.279	12.079	24.451	16.705	22.735
20.6398	8.23073	14.7544	12.4454	4.92139	21.9353	11.2971	9.62347	10.287	6.37548	13.222	12.632	4.451	30.737	22.556
18.9434	19.5523	8.0442	12.3367	3.69729	9.90651	12.243	9.64727	7.74779	9.62835	13.165	2.727	3.138	4.956	22.182
28.6104	19.0746	14.8955	7.81942	2.36022	12.9149	20.8803	8.4874	8.1499	6.85462	12.997	4.995	5.527	29.591	21.934
21.944	26.1769	7.9624	11.0674	5.82265	19.5689	16.2213	6.64461	5.84	6.9302	12.859	1.336	5.222	12.182	21.895
11.6103	17.0836	13.0153	11.6861	9.37111	13.7171	9.73278	17.8825	6.38186	15.62	12.542	12.927	15.517	3.548	21.204
37.9296	15.9617	5.43833	11.7122	7.38005	16.306	13.78	4.8125	6.70342	8.24069	12.453	2.791	4.512	23.715	20.371
29.1574	11.9021	13.2707	7.20468	3.58571	10.1932	10.158	11.1911	8.84349	12.2655	12.117	2.481	4.354	6.987	20.089
23.9405	12.8475	7.0082	8.18687	4.23037	17.7475	14.156	8.26724	9.07725	8.02751	11.908	10.372	3.681	12.822	19.526
23.5846	21.4559	8.58706	7.39396	3.76403	13.3359	19.7532	7.58275	6.79574	6.47995	11.782	19.795	2.351	12.782	19.212
24.1221	9.15577	4.16221	7.68999	3.522	15.0297	11.8222	11.5096	8.6884	5.96745	11.628	8.132	19.402	14.014	18.961
25.1188	10.3411	6.46937	10.9056	4.06307	15.7641	9.27052	11.3276	4.9791	4.70798	11.252	12.071	13.822	16.234	18.15
23.416	21.7791	14.4193	10.0541	5.99823	10.5886	12.9251	16.2018	4.3325	6.86712	11.23	12.33	10.578	30.613	18.136
26.9272	13.3777	6.1418	2.28261	2.7121	13.3627	7.88189	8.55602	10.5989	4.50229	11.162	8.169	19.597	21.325	17.558
25.34	14.9637	5.59934	7.65391	4.89054	20.9465	10.7136	6.95514	2.30514	5.46331	11.09	7.812	1.181	7.849	16.918
27.5824	19.8073	6.90437	10.1806	3.49224	14.3984	15.187	7.00493	2.37615	5.28353	10.871	18.302	14.213	21.317	16.747
27.5071	13.8286	7.95161	7.36521	4.95826	13.2154	8.15084	6.05783	10.3932	5.80189	10.858	9.032	12.508	15.306	16.316
31.9203	12.0376	7.63753	8.46537	4.23394	12.7714	11.9014	6.62435	10.6597	7.6838	10.593	3.653	13.32	26.037	16.216
19.5342	10.9149	5.96054	6.1464	4.14318	11.1849	18.5827	4.18153	5.68156	4.5232	10.483	6.759	26.793	4.663	16.047
27.4817	9.0572	5.48065	8.23857	7.60438	14.3803	16.7529	8.57674	13.2888	3.97444	10.023	2.533	6.76	28.849	15.952
	14.9172				11.7045	10.1256	6.43736	3.60659	4.63428	9.557	4.636	15.145	10.375	15.759
	15.9838					10.068	9.04761	11.499	4.4046	9.429	2.572	10.096	3.567	15.418
	10.6985					17.4145	6.65895	7.73667	5.50246	9.341	14.45	13.601	10.224	15.348
	11.5611					20.0013	7.30856	6.69935	5.36691	8.959	8.014	4.625	11.052	15.321
	0					11.5593	11.5917	6.95321	4.31096	8.746	19.733	23.48	17.794	15.121
						9.23219	8.52487		4.52391	8.51	3.1	23.986	13.863	14.983
						14.3657	8.54703		6.7152	8.423	9.158	18.895	10.62	14.912
						17.8656	8.68578		3.5412	8.253	6.975	25.445	7.759	14.725
						8.9677	10.1674		4.15862	8.236	3.311	19.748	13.785	14.426
						4.70798	6.63638		4.9512	8.214	2.529	2.429	5.363	14.168
						6.86712			3.58741	8.018	4.801	11.683	14.089	13.611
						4.50229			1.05166	8.004	15.394	6.607	29.431	13.379
						5.46331			2.01472	7.795	12.849	15.31	12.058	12.419
						5.28353			2.97532	7.739	12.513	12.483	18.802	12.372
						5.80189				7.566	3.905	6.243	5.675	12.308
						7.6838				7.565	10.97	10.807	8.894	12.115
						4.5232				7.521	17.133	6.896	8.11	12.098
						3.97444				7.404	8.091	14.395	20.199	11.614
						4.63428				7.3	10.377	6.761	6.601	11.408
										7.204	27.605	2.111	13.769	11.368
										6.898	12.051	11.154	14.535	11.202
										6.508	20.169	5.431	3.618	11.115
										6.469	9.437	7.099	12.127	11.098
										6.366	12.858	19.684	3.464	10.586
										6.25	6.485	11.32	16.858	10.453
										6.167	28.611	14.356	5.045	10.242
										5.952	19.291	10.722	11.344	10.033
										5.945	11.255	18.562	7.672	9.742
										5.734	6.56	16.419	12.238	9.616
										5.384	8.404	2.753	6.963	9.471
										5.266	35.204	5.378	15.84	9.028
										5.245	3.58	10.175	4.604	8.862
										5.219	9.099	10.498	15.264	8.845
										5.202	9.045	12.244	9.586	8.767
										4.987	11.793	7.841	4.761	8.707
										4.783	8.07	5.343	2.536	8.494
										4.528	6.112	2.719	4.685	7.932
										4.482	11.918	8.839		7.894
										3.992	5.369	3.549		7.874
										3.666	5.973	7.4		7.574
										3.271	1.757	4.504		6.886
										2.693	9.193	5.576		6.677
										2.436	3.353	4.424		5.908
										2.241	11.374	1.228		4.887
										1.691	19.226	1.311		3.941
										1.657	3.006	7.082		3.863
										1.633	16.432	6.088		3.272
										1.466	24.879	7.328		2.857
										1.38	7.051	1.611		2.784
										1.305	17.701	8.951
										1.281	15.065	7.516
										1.217	18.337	9.613
										1.169	11.827	10.781
										1.125	8.892	2.101
										1.081	15.646	5.344
										0.948	6.051	8.323
										0.746	9.592	12.761
										0.677	12.977	9.799
										0.459	7.321	9.979
										0.167	5.875	25.261
										0.165	7.525	2.317
										0.07	7.675	8.464
										0.061	10.204	5.154
										0.041	9.097	29.536
										0.01	5.799	25.305
										0.009	11.928	24.19
										0.008	3.074	20.788
										0.006	3.069	20.41
										0.006	12.37	19.271
										0.006	10.944	19.126
										0.006	10.928	18.696
										0.005	5.096	18.664
										0.004	13.155	18.585
										0.004	15.976	18.103
										0.004	3.327	18.095
										0.004	5.232	18.031
										0.003	13.077	17.763
										0.003	9.228	17.628
										9.09e-05	4.802	16.476
										0	2.928	16.167
										0	12.02	15.905
										0	3.717	15.401
										0	5.847	15.328
										0	10.746
										0	7.061
										0
										0
										0
										0
										0
										0
										0
										13.559
										13.763
										0.003
										0.004
										0.009
										5.266
										0.006
										0.005
										6.25
										1.38
										0.008
										0.061
										0.677
										3.271
										9.557
										0.006
										18.585
										13.836
										0.006
										0.006

## Sheet: Extended Data Fig.3m
Extended Data Fig.3m: Percentage of cells highly expressing NANOG (NANOGhigh) determined by FACS analysis at 0, 6, 8, 12, and 24 hours after treatment with 1 μg/mL doxycycline in WT mESCs overexpressing inducible GFP-Lamin A
0h	6h	8h	12h	24h
49.61	46.37	53.8	51.05	68.41
48.05	48.07	49.14	53.04	65.4
49.97	49.76	48.79	48.75	72.61

## Sheet: Extended Data Fig.3o
Extended Data Fig.3o: Percentage of NANOGhigh cells in WT mESCs overexpressing inducible GFP-Lamin A cultured in naïve conditions (15%FCS/LIF) or primed conditions (bFGF/ Activin A) for 24h with or without 1 μg/mL doxycycline
	naive			primed
-dox	49.27	48.63	50.27	31.96	28.47	27.12
+dox	75.73	73.15	72.54	72.44	71.98	70.53
