# Supplementary material for: Lamin A/C-regulated cysteine catabolic flux modulates stem cell fate through epigenome reprogramming
Source: Springer Nature journal article supplement (doi:10.1038/s42255-025-01443-2), 2026-01-28
Supplement: MOESM28 [file 42255_2025_1443_MOESM28_ESM.xlsx]

## Sheet: Extended Data Fig.4b
Extended Data Fig.4b
Relative LaminA/C protein fold change
E14	R1
1	1.42123
1	1.59095
1	1.32104
1	1.39882

## Sheet: Extended Data Fig.4e
Extended Data Fig.4e
Relative cysteine level
R1/2i+LIF	R1/activin + FGF	EpiSC/activin + FGF
0.681229	6.16413	13.5803
0.723877	5.35834	11.231
1.0547	9.04725	11.4217
1.32735	6.42199	7.48993
1.03205	7.78275	11.1107
1.1808	9.66803	8.3031

## Sheet: Extended Data Fig.4g
Extended Data Fig.4g
Relative protein fold change
	Lmna+/+			Lmna-/-
CTH	1	1	1	4.6	3.7	3.8
CBS	1	1	1	2.4	2.9	3.5

## Sheet: Extended Data Fig.4h
Extended Data Fig.4h
Relative cysteine level in R1 mESC
Lmna+/+	Lmna-/-
1.01	11.84
0.98	10.27
0.97	9.74
1.25	8.19
1.37	13.28
0.72	14.57

## Sheet: Extended Data Fig.4j
Extended Data Fig.4j
% of NANOG high cells
Lmna+/+	Lmna-/-
43.07	12.01
45.32	13.76
47.08	14.01

## Sheet: Extended Data Fig.4l
Extended Data Fig.4l
Relative mRNA expression
	R1 WT				R1 Lmna KO
Atp2a3	1.042	0.959693	1.16046	0.861724	10.267	9.6249	24.0449	21.6852
Bmp4	1.0172	0.983094	1.09175	0.915964	2.92204	3.01994	2.2197	2.30654
Eomes	1.02871	0.972091	0.943564	1.05981	1.5652	1.4246	2.35416	2.8412
Gata4	0.989789	1.01032	1.00883	0.991243	3.60199	3.45127	1.85472	1.41013
Gata6	1.39134	0.718733	1.01193	0.98821	20.7901	20.586	18.5625	15.3479
Klf4	1.0205	0.979916	1.06297	0.940764	7.13725	7.20106	4.902	6.51132
Klf5	0.995097	1.00493	1.0162	0.984058	3.98809	5.45859	3.54495	3.28254
Smarcd3	0.99268	1.00737	1.06064	0.94283	4.97751	5.10349	3.39068	3.32306
Sox17	0.876783	1.14053	1.03952	0.961978	2.18682	2.10839	1.88972	1.69803
