# Supplementary material for: Lamin A/C-regulated cysteine catabolic flux modulates stem cell fate through epigenome reprogramming
Source: Springer Nature journal article supplement (doi:10.1038/s42255-025-01443-2), 2026-01-28

Full unedited blots for Extended Data Fig. 4a

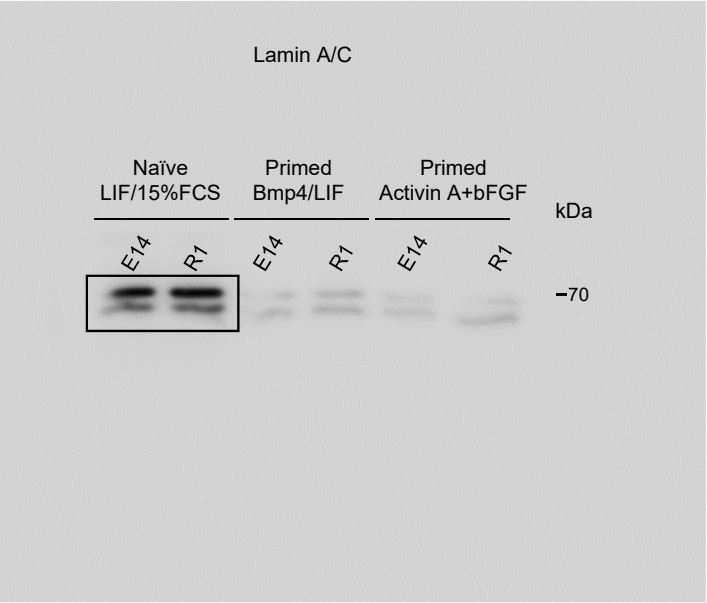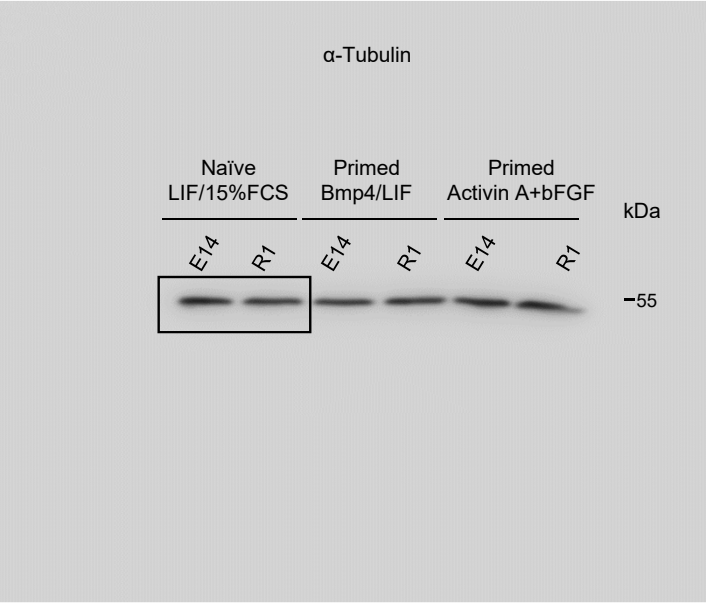

Full unedited blots for Extended Data Fig. 4d

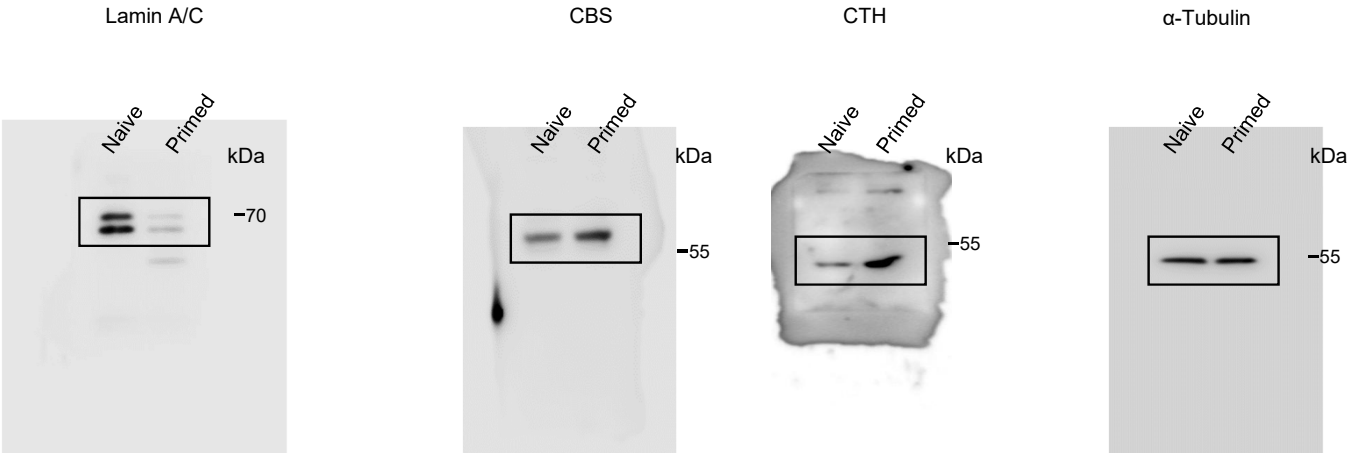

Full unedited blots for Extended Data Fig. 4f

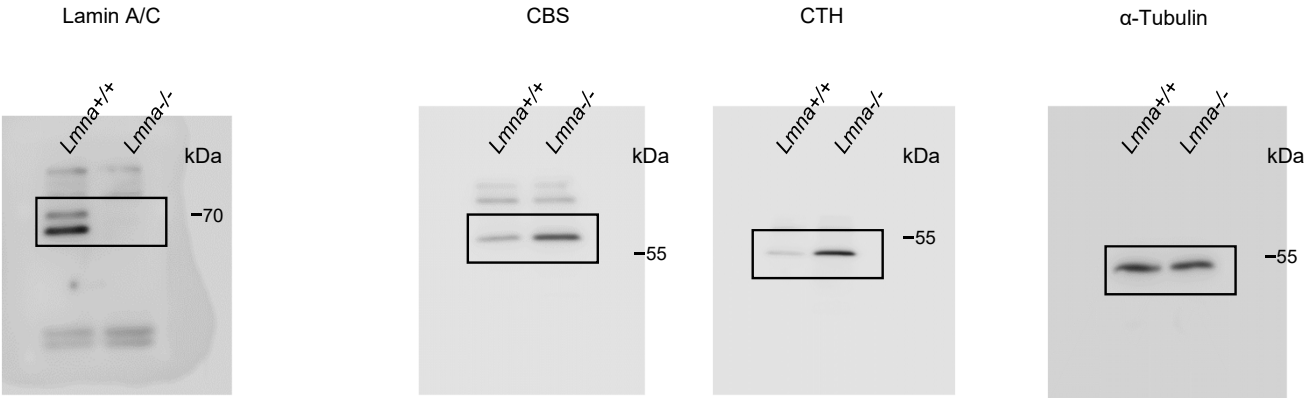

Supplement: MOESM29 [file 42255_2025_1443_MOESM29_ESM.pdf › 42255_2025_1443_MOESM29_ESM.pdf]
