# Supplementary material for: Lamin A/C-regulated cysteine catabolic flux modulates stem cell fate through epigenome reprogramming
Source: Springer Nature journal article supplement (doi:10.1038/s42255-025-01443-2), 2026-01-28
Supplement: MOESM30 [file 42255_2025_1443_MOESM30_ESM.xlsx]

## Sheet: Extended Data Fig.5a
Extended Data Fig.5a
H2S level (μM/mg)
Control	Lmna-/-	Purified CTH	Purified CBS	Negative
1.3	3.4	90	189.5	0
1.5	2.3	87.3	190.4	0
1.3	1.2

## Sheet: Extended Data Fig.5b
Extended Data Fig.5b
Expression of cysteine transporters in RPKM from RNA-seq
	Control			Lmna -/-
Slc1a1	0.379008	0.458369	0.430145	1.18179	1.46199	1.34593
Slc1a5	14.2558	12.8577	12.4192	23.3725	23.8022	20.9949
Slc3a1	0.659681	0.744624	0.567754	0.856543	0.786721	0.675018
Slc7a9	0.159404	0.079381	0.138511	0.060219	0	0.059837
Slc7a11	0.197023	0.15989	0.268121	0.084538	0.059111	0.135133

## Sheet: Extended Data Fig.5c
Extended Data Fig.5c
Total Acetyl CoA (pmol/L)		Nuclear acetyl CoA (pmol/L)
Control	Lmna-/-	Control	Lmna-/-
3.30912	11.0945	0.57487	3.82456
4.62315	8.67475	0.47487	3.12456
3.52011	8.835	0.37487	4.32456

## Sheet: Extended Data Fig.5d
Extended Data Fig.5d
Relative protein level
	Control			Lmna-/-
H3K9ac	0.879443	0.733691	1.38687	2.56469	3.45464	2.7129
H3K27ac	1.11508	1.02269	0.86223	1.7402	2.3366	1.89756
H3K56ac	1.10579	1.0756	0.818611	0.796298	1.1138	1.55866
pan-H3ac	0.979941	1.15761	0.862446	2.62474	1.77104	1.67179

## Sheet: Extended Data Fig.5f
Extended Data Fig.5f
Relative protein level
	H3K9ac	H3K27ac	pan-H3ac
0h	1	1	1
	1	1	1
	1	1	1
1h	1.03952	0.918503	0.984226
	0.990661	1.12769	1.00042
	0.996933	1.00471	0.909385
3h	0.849541	0.72879	0.866116
	0.804671	0.872377	0.934005
	0.818183	0.716038	0.811598
6h	0.544264	0.653822	0.767286
	0.535413	0.830204	0.870183
	0.547914	0.653111	0.517721
9h	0.449361	0.540331	0.757712
	0.700523	0.680711	0.550899
	0.444495	0.546055	0.665527
24h	0.426189	0.215381	0.59259
	0.411977	0.273953	0.550439
	0.405687	0.470325	0.746061

## Sheet: Extended Data Fig.5h
Extended Data Fig.5h
Relative protein level in R1 mESC
	Control			Lmna-/-
H3K9ac	1	1	1	2.27428	2.42015	2.40805
H3K27ac	1	1	1	1.48821	1.53933	1.53596
pan-H3ac	1	1	1	2.01578	1.87677	1.84116

## Sheet: Extended Data Fig.5i
Extended Data Fig.5i
Relative protein level
	Control			G609G/G609G			CBS/CTH G609G/G609G
H3K9ac	1	1	1	0.384503	0.450356	0.394353	1.37912	1.00432	0.715899
H3K27ac	1	1	1	0.451151	0.224467	0.520397	1.28732	0.824557	1.54843
pan-H3ac	1	1	1	0.337651	0.351923	0.334992	1.20615	1.2466	1.23053

## Sheet: Extended Data Fig.5j
Extended Data Fig.5j
H3k9ac Fluorescence intensity (a.u.)
0h	6h	8h	12h	24h
78.796	93.849	95.11	87.618	14.049
85.471	88.615	87.35	71.785	40.057
69.793	71.49	67.84	64.734	22.237
89.793	66.99	53.16	57.026	27.822
78.615	62.33	52.693	56.783	13.011
74.496	51.407	48.515	51.955	22.096
76.873	50.722	47.098	49.208	24.636
62.036	49.369	45.427	46.521	34.989
54.796	48.918	44.26	45.92	15.992
54.663	42.104	44.247	42.112	27.012
54.118	41.993	42.811	37.019	27.089
53.537	41.198	42.597	34.773	32.529
50.568	41.068	41.909	34.587	17.632
49.658	41.01	41.196	33.651	26.423
48.275	39.607	41.143	31.137	11.36
47.551	39.535	40.611	30.674	21.11
45.707	39.233	40.568	28.472	10.812
44.155	39.116	39.598	26.165	17.41
44.155	36.993	38.463	26.092	16.642
42.775	35.022	35.275	25.863	25.903
41.548	34.401	35.258	25.829	17.85
40.747	34.034	35.177	25.331	20.244
40.492	33.99	34.41	24.925	25.943
40.391	33.902	33.95	24.915	14.801
40.391	33.662	32.978	24.826	22.031
38.768	33.607	31.189	24.464	31.022
37.833	33.035	31.102	24.362	12.206
37.49	32.855	30.977	23.326	31.615
37.019	32.609	30.952	23.263	22.788
32.864	31.687	29.384	23.218	28.854
32.375	31.393	27.703	23.07	22.126
31.319	31.306	27.577	22.848	32.798
30.822	30.716	27.486	22.694	21.682
30.336	30.054	27.344	22.382	19.535
29.681	28.862	26.796	22.112	10.038
29.681	28.628	26.028	21.19	22.937
29.559	28.479	25.659	19.782	16.298
28.949	28.3	24.253	18.54	8.221
28.921	28.236	23.039	18.186	30.741
28.09	28.086	22.743	17.519	25.058
27.317	27.573	22.686	17.196	19.821
27.317	27.368	20.783	16.812	63.807
27.012	26.798	20.242	15.749	23.632
25.943	26.068	20.233	15.006	7.916
25.483	25.608	19.903	14.532	37.916
24.891	25.48	19.489	13.534	70.015
24.891	24.767	18.981	13.224	29.13
23.238	24.438	18.672	12.504	21.197
23.238	24.201	18.603	11.732	28.811
23.221	23.607	18.075	11.71	25.116
22.996	23.289	16.422	11.304	45.029
21.843	22.365	16.309	11.095	56.468
20.835	21.732	15.485	10.496	46.883
20.269	21.588	13.028	10.275	18.943
19.953	21.542	7.965	9.249	17.754
19.333	21.13		9.135	17.339
19.333	20.678		6.202	15.964
19.219	20.486		5.944	15.769
19.219	19.821		6.348	14.869
19.116	19.767		3.583	14.861
18.923	19.032			14.562
18.588	13.117			7.12
18.576	12.615			8.24
17.855	12.471			6.31
16.452	11.202			4.92
16.383	10.851			3.08
16.383	8.114
15.234
14.683
14.587
14.17
14.084
13.653
12.435
11.865
10.833
10.833
9.441
7.759
7.355
7.217
