# Supplementary material for: Lamin A/C-regulated cysteine catabolic flux modulates stem cell fate through epigenome reprogramming
Source: Springer Nature journal article supplement (doi:10.1038/s42255-025-01443-2), 2026-01-28

Full unedited blots for Extended Data Fig. 5d

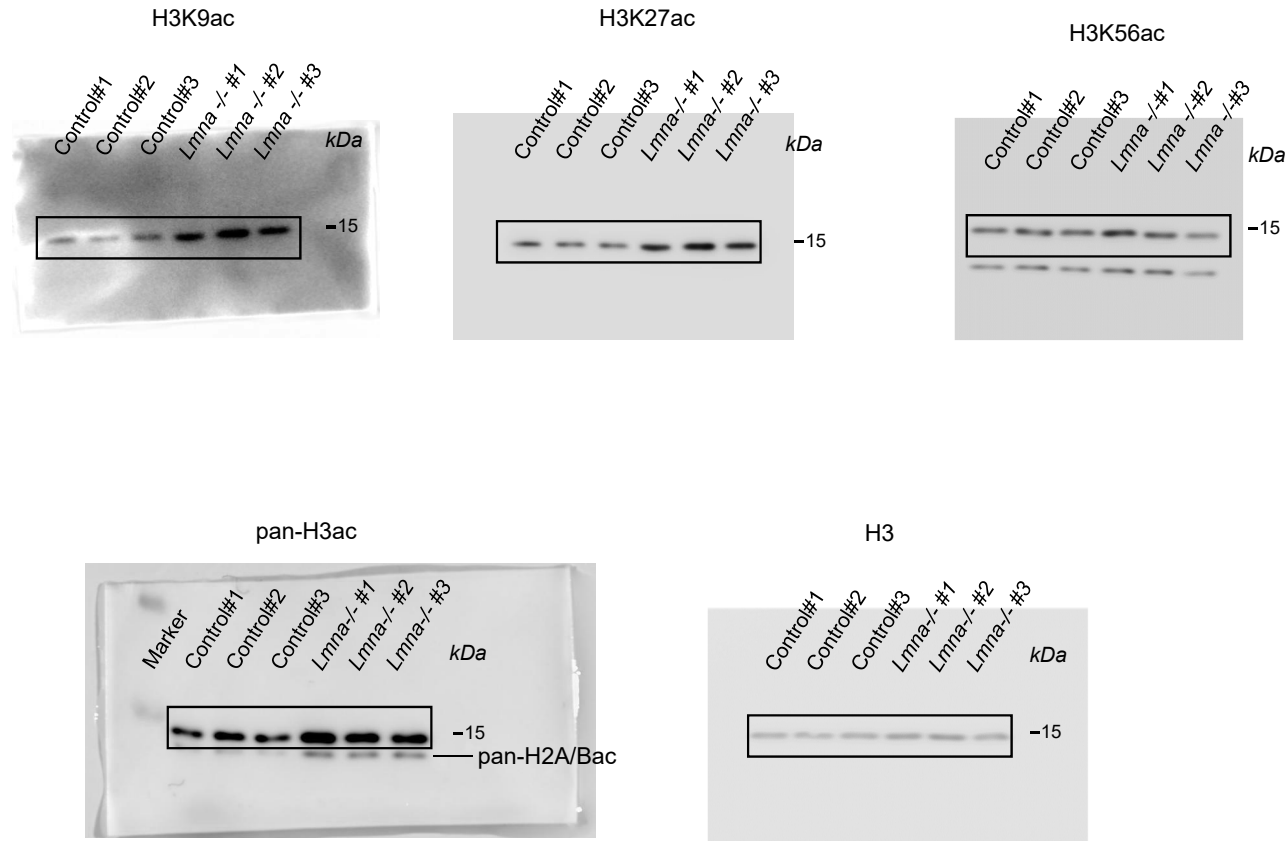

Full unedited blots for Extended Data Fig. 5e

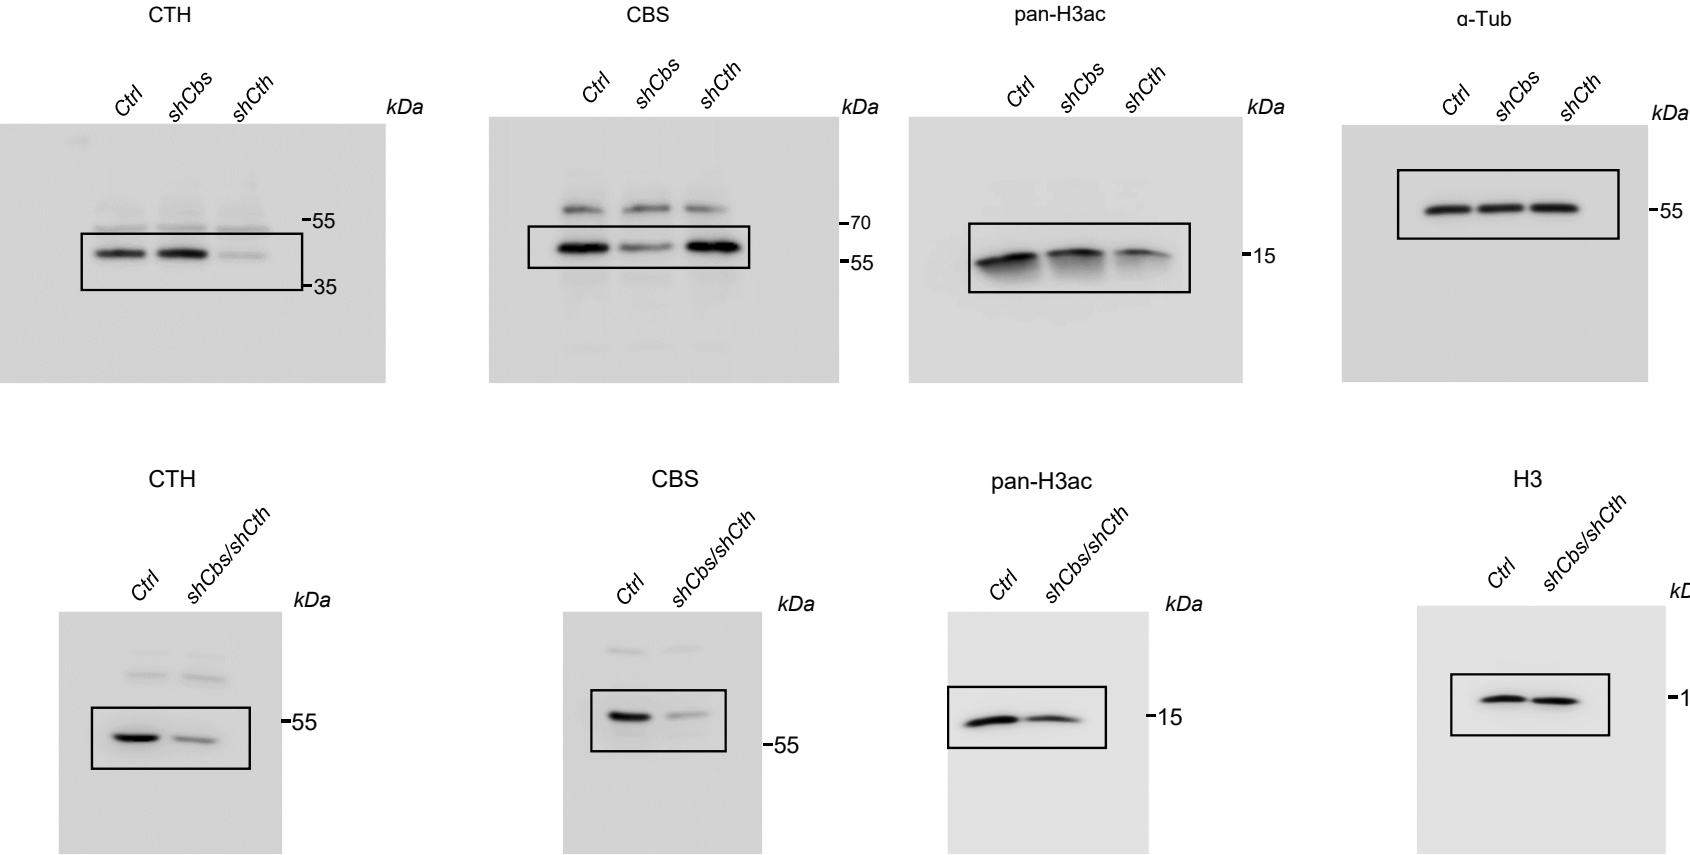

Full unedited blots for Extended Data Fig. 5f

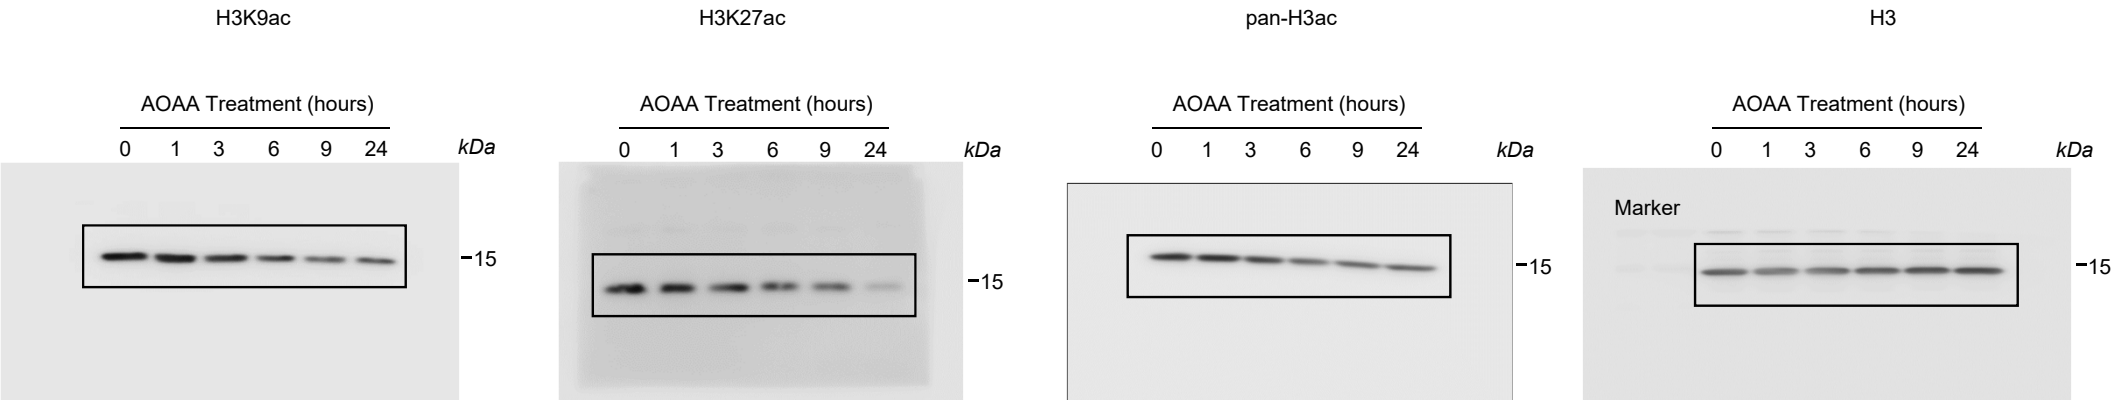

Full unedited blots for Extended Data Fig. 5g

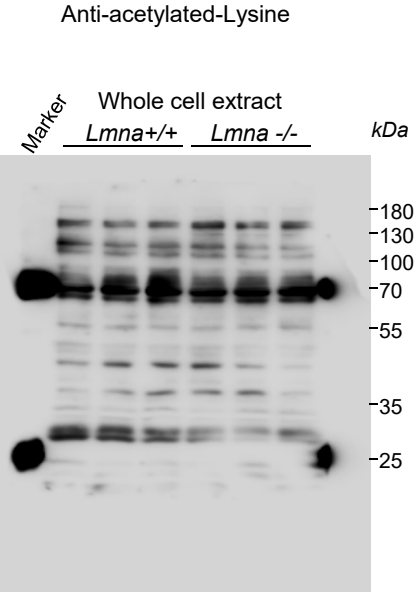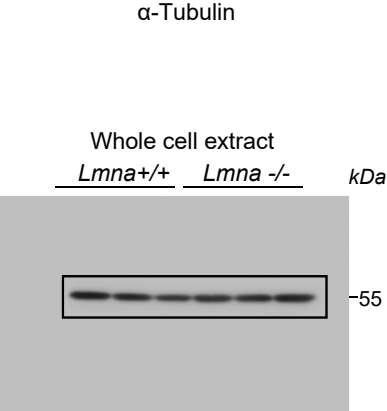

Full unedited blots for Extended Data Fig. 5h

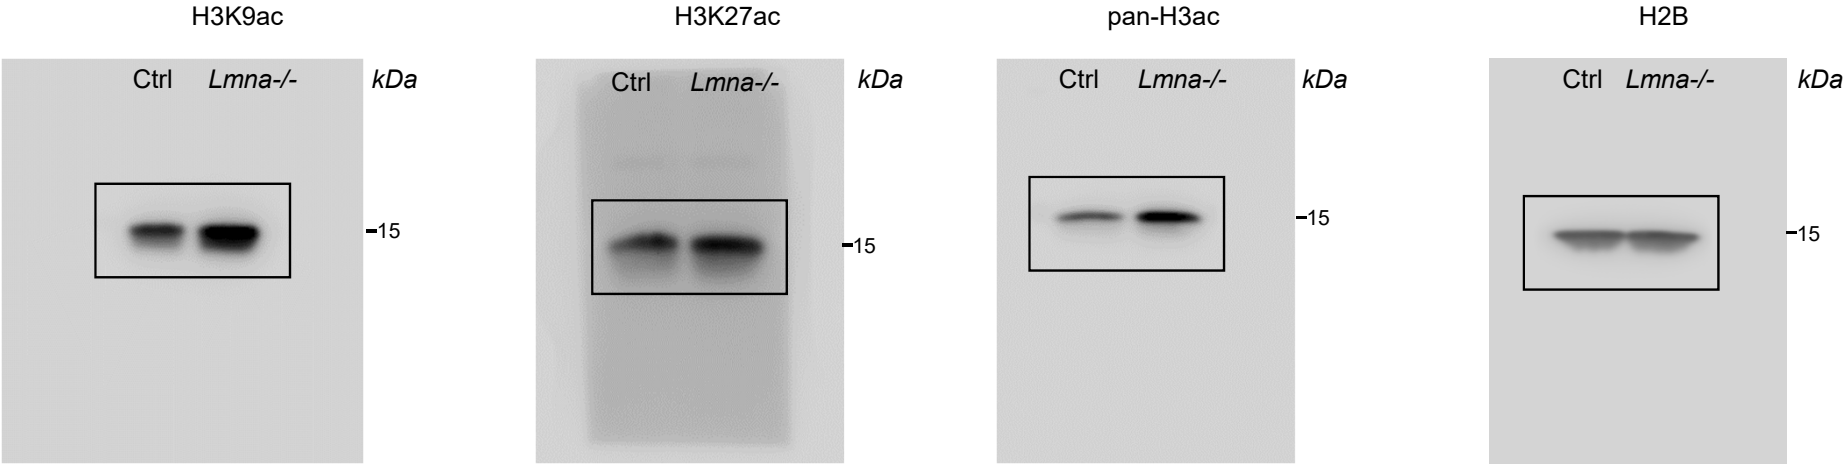

Supplement: MOESM31 [file 42255_2025_1443_MOESM31_ESM.pdf › 42255_2025_1443_MOESM31_ESM.pdf]
