# Supplementary material for: Lamin A/C-regulated cysteine catabolic flux modulates stem cell fate through epigenome reprogramming
Source: Springer Nature journal article supplement (doi:10.1038/s42255-025-01443-2), 2026-01-28
Supplement: MOESM32 [file 42255_2025_1443_MOESM32_ESM.xlsx]

## Sheet: Extended Data Fig.6a
Extended Data Fig.6a：Overlap of genes upregulated in Lmna-/- mESCs with genes downregulated in Lmna-/- ESCs after shRNA mediated silencing with shRNA against Cth or Cbs. Log2 fold change ≤- 0.58, ≥ 0.58; p-adjusted value <0.05
Genes upregulated in shCtrl Lmna-/- vs shCtrl Control	Genes downregulated in shCth Lmna-/- vs. shCtrl Lmna-/-	Genes downregulated in shCbs Lmna-/- vs. shCtrl Lmna-/-
Zfp85	Fbxo41	Fbxo41
Fbxo41	Taf9b	Taf9b
Taf9b	Itga8	Primpol
Primpol	Tmem151a	Thnsl1
Zfp456	Limch1	Slc35d2
Thnsl1	Nol4l	Cyp2c23
Slc35d2	Hspa2	Sohlh1
Plekha8	Pram1	Ephx4
Usp17ld	Fbxl12	Mpzl1
Prss48	AI413582	Limch1
Sohlh1	Adamts7	Nol4l
Mpzl1	Atg9a	Panx2
Limch1	Rab11fip5	Hspa2
Nol4l	Senp7	Tdrd1
Panx2	Ckap2	Tmem158
Hspa2	Slc13a5	Pram1
Tdrd1	A4galt	AI413582
Pram1	Scarf1	Adamts7
Zfp457	Sgpp2	Atg9a
Kcnq2	Fam222a	Rab11fip5
Masp2	Whamm	Ckap2
Senp7	Zfp560	Slc13a5
Zfp619	Gm5617	Scarf1
Ckap2	Cntnap2	Sgpp2
Slc13a5	Nuak1	Whamm
AU018091	Scube3	Rexo5
9930012K11Rik	Tacc2	Gm5617
Scarf1	Pla2g4c	Nuak1
Sgpp2	Ypel2	Scube3
Whamm	Sp9	Pla2g4c
Rexo5	Ajm1	Ypel2
Zfp560	Itgb4	Sp9
Amigo1	Patj	Mreg
Cntnap2	Aga	Zcwpw1
Scube3	Epb41l1	Syne2
Tacc2	Phactr3	Itgb4
Pla2g4c	Adam22	Aga
Ypel2	Slc25a42	Mtus1
Sp9	Btbd8	Epb41l1
Mreg	Tceanc	Phactr3
Ajm1	Daam2	Adam22
Zcwpw1	Zfp760	Rffl
Syne2	Adora1	Slc25a42
Rsrc2	Pde2a	Btbd8
Itgb4	Whrn	Tceanc
Zfp69	Naaladl1	Rtn1
Mtus1	Unc13d	Mxi1
Phactr3	A3galt2	Pde2a
Adam22	Txnip	Whrn
Zdhhc23	Ficd	Naaladl1
Rffl	Ppp1r13l	Zfp36l3
Slc25a42	Olfr543	Unc13d
Trpv5	Adcy5	Txnip
Btbd8	Lrrn4cl	Slc38a8
Tceanc	Ctc1	Ficd
Pramel20	Npcd	Ppp1r13l
Dync2i2	Wdr91	Gpr12
Zfp760	Nrp	Hs3st6
Adora1	Tmprss13	Acd
Whrn	Podnl1	Adcy5
Naaladl1	Rasl10b	Lrrn4cl
Unc13d	Mrs2	Odf3b
Txnip	Scn4b	Ctc1
Slc38a8	Tcaim	Npcd
Mdc1	Ddn	Wdr91
Slc10a5	Lingo3	Sesn1
Ppp1r13l	Capn11	Nrp
Gpr12	Aim2	Arhgef39
Hrh2	Adgrf3	Rasl10b
Olfr543	4930404N11Rik	Mrs2
Zfp708	Snx13	Scn4b
Hs3st6	Zfyve28	Tcaim
Acd	Rap1gap2	Ddn
Adcy5	Arid3c	Zfp57
Odf3b	Izumo1	Tmem151b
Ctc1	Trim15	Grhl3
Npcd	Anks6	Lingo3
Sesn1	Adamts15	Capn11
Nrp	Pla2g4f	Aim2
Arhgef39	Cep170b	Ccdc92b
Zfp930	C1ql4	Adgrf3
Grm4	Gal3st3	Zmynd12
Rasl10b	Adarb1	Zfyve28
Scn4b	Timm9	Rap1gap2
Tcaim	Pitpnm3	Arid3c
Inip	Qsox1	Cox17
Ddn	Pbx4	Zdhhc18
Zfp57	Mbp	Adamts15
Tmem151b	Trp53i11	Fbxo10
Lingo3	Gpr17	Pla2g4f
Zscan4c	Dmbx1	Bcat1
Capn11	Ankrd12	Cep170b
Aim2	Cant1	Rabl6
Ccdc92b	Npnt	Carmil3
Eif1ad7	Pknox2	C1ql4
Adgrf3	Unc13a	Lrp3
Zmynd12	Sec14l3	Adarb1
Espl1	Kcp	Rhox10
Zfyve28	Fat2	Trp53i13
Rap1gap2	Pecam1	Pitpnm3
Arid3c	Lrrc14b	Rbfox3
Zdhhc18	Ntrk1	Pbx4
Izumo1	Bbs1	Mbp
Trim15	Krtdap	Trp53i11
Kbtbd7	1700029J07Rik	St6galnac6
Adamts15	Ttc9	Rtn2
Pla2g4f	Rasl12	Sema3g
Bcat1	Shcbp1l	Gpr17
Pdp2	Ephx3	Dmbx1
Rabl6	2510002D24Rik	Sh2d2a
Carmil3	Slc22a23	Kcnj6
C1ql4	Fam83e	Cadm1
Mctp2	Rab11fip2	Entpd5
Apol7b	Cln6	Npnt
Rhox10	Tmem181a	Pik3cd
Timm9	Skap1	Pknox2
Septin10	C77080	Unc13a
Trp53i13	Myzap	Nova2
Pitpnm3	Ezhip	Zmynd15
Rbfox3	Rprml	Specc1
Zfp563	Ttc7b	Sec14l3
Pbx4	Slc45a4	Kcp
Arl14ep	Calr4	Fat2
Cxadr	Slc5a10	Pecam1
Trp53i11	Mcrip1	Ntrk1
Tas2r137	Trim40	Ecscr
Dmbx1	Yeats2	Rnf166
Kcnj6	Cblb	1700029J07Rik
Npnt	Cfap44	Rasl12
Pknox2	Plekhg1	Tradd
Unc13a	Pak6	Shcbp1l
Nova2	Qrich2	Ephx3
Lonrf2	Brd1	2510002D24Rik
Sec14l3	Prdm6	Slc22a23
Kcp	Cryzl2	Klrg2
Fat2	Slc30a10	Cln6
Dkc1	Sbspon	Slc6a21
Pecam1	Espnl	Tmem181a
Klhdc9	Fhdc1	Skap1
Lrrc14b	Ampd1	C77080
Rnf17	Cox18	Xylb
Ntrk1	Ccdc61	Ezhip
Bbs1	Tmem231	Rprml
Commd6	Tmtc3	Ttc7b
Ecscr	Myrfl	Slc45a4
1700029J07Rik	Syndig1l	Calr4
Tradd	Ttc38	Slc5a10
Shcbp1l	Cdc42bpg	Trim40
Ephx3	Sec31b	Cfap44
2510002D24Rik	Grin3a	Spata5l1
1700066B19Rik	Iqsec3	Gls2
Cln6	Pgr15l	Qrich2
Tmem181a	Cdhr2	Slc4a7
Skap1	Rbm44	5031439G07Rik
C77080	Lgr6	Brd1
Naa11	Tmem211	Prdm6
AU015228	Nlrp12	Cryzl2
Myzap	Lsmem1	Slc30a10
Pls1	Garem1	Sbspon
Ezhip	Arl14epl	Espnl
Rprml	Accsl	Fhdc1
Ttc7b	Drc1	Ampd1
Slc45a4	Spef1l	Ndufb6
Calr4	Zbtb2	Cox18
Slc5a10	Adgrg5	Ccdc61
Trim40	Mfsd2b	Tmem231
Fancd2	Gramd2	Myrfl
Cfap44	Kcnk6	Syndig1l
Zfp583	Klhl32	Ttc38
Plekhg1	Slc47a2	Cdc42bpg
Pak6	Dnaaf3	Sec31b
Spata5l1	Lrrc8b	D430041D05Rik
Mcu	Acsl6	Iqsec3
Stox1	Crxos	Zfp568
Agap2	Dnah1	Pgr15l
Gls2	Ubtfl1	Lrrc36
Gm525	Ak8	Dcp1b
Qrich2	Adamts17	Rbm44
Slc4a7	Armc2	Lgr6
Brd1	Tlcd5	Ceacam16
Prdm6	Bpifb4	Nlrp12
Cryzl2	Ccdc24	Heca
Slc30a10	Dnai2	Lsmem1
Sbspon	Pnpla1	Lrch1
Smim26	Zfr2	Arl14epl
Fhdc1	Tmem92	Lrrc43
Ampd1	Ms4a15	Spef1l
Ndufb6	Sorbs1	Adgrg5
Cox18	St3gal5	BC048644
Vsig10	AU040320	Mfsd2b
Ccdc61	Pakap	Mageb4
Tmem231	Atp2b2	Gramd2
Myrfl	B3gnt8	Pgap3
Syndig1l	Slc41a3	Slc47a2
Abcc4	Rusc2	Dnaaf3
Ttc38	Cgn	Lrrc8b
Cdc42bpg	Adam15	Acsl6
Sec31b	Arhgef10	Crxos
D430041D05Rik	Strip2	Dnah1
Iqsec3	Timm8a2	Ubtfl1
Zfp568	Zfp791	Ak8
Ntn5	Slc22a14	Adamts17
Pgr15l	Baiap2	Thnsl2
Cdhr2	Cd6	Calca
Treml2	Wdr93	Limk2
Rbm44	Gm11992	Retreg1
Lgr6	Dusp22	Armc2
Rnf224	Arsi	Erich1
Ceacam16	Cldn19	Tlcd5
Tmem211	Kcnh1	Bpifb4
Trim75	Mapt	Ccdc24
Nlrp12	Olfm1	Dnai2
Cdkl4	Gng7	Pnpla1
Arl14epl	Faim2	Zfr2
Accsl	Gpr146	Tmem92
Spef1l	P2rx7	Ms4a15
Foxr1	Atp8a1	Defb42
Bclaf3	Kif5a	Sorbs1
Iqgap3	Klk13	Golm1
BC048644	Trim63	Setd6
Mfsd2b	Ldb3	St3gal5
Mageb4	Prkcz	Atp2b2
Gramd2	Tom1l2	Nfatc2
Klhl32	Trpm1	Slc41a3
Tnfaip8l3	Asb1	Rusc2
Pgap3	Triobp	Adam15
Bex6	Kcnd3	Arhgef10
Slc47a2	Nsmf	Strip2
Dnaaf3	Kif21b	Timm8a2
Acsl6	Kcnj10	Slc22a14
Crxos	Pnkd	Cd6
Dnah1	Myo6	Cdh3
Trim80	Tesmin	Ccdc107
Pramel17	Iffo1	Wdr93
Ubtfl1	Slc30a2	Gm11992
Zfp551	Mks1	Dnajb6
Ak8	Tmem141	Dusp22
Adamts17	Flot2	Dbi
Thnsl2	Cdkn2a	Cldn19
Calca	Clmn	Marveld2
Cibar2	Zfp692	Olfm1
7420426K07Rik	Rspo4	Gng2
Ncoa4	Uevld	Gng7
Limk2	Mtmr7	Faim2
Pramel31	BC051019	Tmod2
Armc2	Cacna1b	P2rx7
Erich1	Apaf1	Atp8a1
Tlcd5	Arrdc4	Kif5a
Mrgprx2	Cd74	Klk13
Bpifb4	Sstr2	Trim63
Ccdc24	Htra3	Ldb3
Dnai2	Smad7	Prkcz
Kbtbd6	Syne3	Trpm1
Pnpla1	Prss57	Triobp
Zfr2	Ankdd1b	Gmfg
Tmem92	Drc7	Aifm2
Ms4a15	Slc22a18	Zfhx2
Mansc4	Sema3b	Kcnd3
Defb42	Map6	Nsmf
Golm1	Cacna1i	Kif21b
Setd6	Gcdh	Kcnj10
Atp2b2	Mef2b	Wfdc10
Nfatc2	Mfge8	Pnkd
Slc41a3	Proca1	Dnm2
Prok2	Fam83b	Pstk
Cgn	Prss38	Mlf1
Arhgef10	Hsf5	Myo6
Strip2	Zfp952	Abca3
Timm8a2	Dbndd2	Lhx3
Zfp791	Lyrm9	Tesmin
Slc22a14	Fhl1	Iffo1
Zdhhc12	Scn8a	Slc30a2
Cd6	Tsks	Zfp869
BC147527	Shroom3	Tmem141
Wdr93	Brdt	Nadk2
Gm11992	Repin1	Flot2
Deptor	Trim72	Clmn
Dusp22	Ripor2	Zfp692
Banf1	Vamp1	Rspo4
Arsi	Ripor3	Uevld
Cldn19	Vamp5	Mtmr7
Marveld2	Ret	Dlgap4
Mapt	Rapgefl1	Cacna1b
Olfm1	Lrp8	Apaf1
Ric3	Cdr2l	Arrdc4
Gng2	Ddias	Cd74
Gng7	Cfap91	Nlrp9c
Faim2	Cnksr1	Htra3
Tmod2	Dennd3	Smad7
P2rx7	Lct	Prss57
Atp8a1	Gpat2	Drc7
Kif5a	Morn1	Pcdh8
Klk13	Uvssa	Slc22a18
Trim63	Cd8a	Sema3b
Cox8c	Nccrp1	Map6
Ldb3	Jhy	Slc7a2
Prkcz	Gli2	Gcdh
Trpm1	Gpr161	Mef2b
Ddhd1	Adamts14	Mfge8
Asb1	Dhtkd1	Proca1
Aifm2	Upf2	Prss38
Zfhx2	Prrg3	Hsf5
Kcnd3	Gabbr2	Ccnjl
Mtcp1	Kcnq4	Tulp2
Kif21b	Lonrf1	Zfp952
Kcnj10	Marf1	Dusp16
Catsperz	Mdga1	Idnk
Wfdc10	Fam171a1	Dbndd2
Pnkd	Slc4a11	Lyrm9
Gtf2a2	Aspg	Bsg
Pstk	Lama5	Ap2a1
Mlf1	Frmpd1	Plin5
Myo6	Heatr5b	Scn8a
Rad54b	Hcn4	Tnfrsf9
Mroh8	Zfp174	Tsks
Glyctk	Myo1a	Shroom3
Gm20767	Mn1	Nkx2-2
Lhx3	Ripor1	Sdhaf3
Tesmin	Fbxo43	Hnrnph3
Mks1	Prss53	Brdt
Arhgap12	Dscaml1	Fgfr1
Sco1	Ak5	Trim72
Tmem141	Ccdc88b	Ripor2
Larp1b	Tmem236	Ret
Tet2	C2cd4b	Bicdl1
Flot2	Myo5c	Rab11fip1
Clmn	Zkscan2	Rapgefl1
Zfp692	Dnah2	Lrp8
Rspo4	Slc9a5	Cdr2l
Uevld	Plekhg4	Ddias
Mtmr7	Cul9	Cfap91
BC051019	Sipa1l2	Tmem243
Kntc1	L3mbtl1	Srgap1
Cacna1b	Adgrd1	Cnksr1
Akap1	Lrrc7	Slc25a18
Apaf1	Cystm1	Tecpr2
Arrdc4	Shank2	Dennd3
Cd74	Chd5	Rgs11
Sstr2	Ctcfl	Lct
Htra3	Plb1	Gpat2
Nusap1	Unc13b	Grik3
Smad7	Fndc1	Morn1
Ankdd1b	Dip2a	Cd8a
Drc7	Galnt16	Nccrp1
Pcdh8	Chrna10	Fam89a
Slc22a18	Rbm24	Map7d2
Sema3b	Fam184a	Ogdhl
Zfp2	Ccdc15	Dhtkd1
Gcdh	Ankrd44	Kcng1
Rbak	Ino80d	Prrg3
Mapk1ip1	Plcd4	Kcnq4
Mef2b	Sh2b1	Lonrf1
Mfge8	Rgs3	Rap1gap
Proca1	Nacad	Mdga1
Fam83b	Neurl1b	Slc4a11
Prss38	Nup62cl	Aspg
Hsf5	Gnb1l	Frmpd1
Ccnjl	Tmprss9	Heatr5b
Tulp2	Apol8	Htra4
Zfp952	Efr3b	Eml5
Snrpa	Sdr39u1	Hcn4
Agbl5	Ptpru	Myo1a
Lyrm9	Disp3	Fbxo43
Plin5	Ttll9	Dscaml1
Scn8a	Greb1l	Ccdc88b
Tsks	Prr5l	Taok3
Ccdc173	Pars2	Tmem236
Lrba	Slc12a8	C2cd4b
Sdhaf3	Sbsn	Myo5c
Hnrnph3	Fetub	Zkscan2
Brdt	Nr3c2	Dnah2
Trim72	Kdf1	Slc9a5
Vamp1	Scn3b	Plekhg4
Ret	Slc35a2	Cul9
Rapgefl1	Speg	Sipa1l2
Lrp8	Myh7b	L3mbtl1
Tubb1	Steap3	Adgrd1
Tead4	Cisd3	C9orf72
Ddias	Zbtb34	Rhobtb1
Brca2	Tmem8b	Cystm1
Cacna1s	Fam131c	Shank2
Cfap91	Pramel19	Cnfn
Tmem243	Tmem235	Chd5
Pde11a	Tcp11	Ctcfl
Dock9	Kif26a	Tbc1d31
Cnksr1	Hic1	Prss33
Slc25a18	Tead3	Unc13b
Nhs	Ndufa4l2	Fndc1
Tecpr2	Tox2	Dip2a
Slc9a3	Arhgap44	Galnt16
Zfp707	Duox1	Chrna10
Dennd3	Shisal2a	Rbm24
Rgs11	Tmem35b	Fam184a
Lct	Zkscan16	Ccdc15
Cubn	Sh2d5	Ankrd44
Lrp2	Myh3	Fbxo47
Gpat2	Pnmal2	Ino80d
Cep152	Fbxo39	Wdr86
Saxo1	Otof	Iqck
Grik3	Bicral	Plcd4
Morn1	Wfikkn1	Ppp2r5c
Cd8a	Zbtb42	Sh2b1
Ankrd26	Pnma5	Ccnd3
Nccrp1	Mkrn2os	Rgs3
Jhy	Prrt4	Nacad
Adamts14	Cyp4f17	Dact3
Ogdhl	Akap5	Neurl1b
Dhtkd1	Slc35g2	Klhl34
Upf2	Fam71f2	Nup62cl
Kcng1	Clec2l	Fam43b
Prrg3	Susd5	Tomt
Ankrd35	Ccdc8	Gnb1l
Kcnq4	Acbd5	Tmprss9
Lonrf1	Calml4	Apol8
Npat	Cnnm2	Rnf144a
Marf1	Phldb3	Efr3b
Rap1gap	Kif19a	Pigyl
Mdga1	Zglp1	Spint2
Slc4a11	Myo15	Sdr39u1
Sap30l	Ablim1	Ptpru
Aspg	Vmn2r90	Disp3
Lama5	Gm11545	Ttll9
Frmpd1	Kif21a	Greb1l
Heatr5b	Kazn	Slc12a8
Focad	Dlg4	Sbsn
Eml5	Bcan	Fetub
Hcn4	Fam71a	Nr3c2
Zfp174	Cbfa2t3	Scn3b
Myo1a	Trpc2	Wbp1
Gpr179	Rnft2	Myh7b
Ercc6	Apoc1	Steap3
Stum	Inpp5d	Ndufaf6
Pigg	Hpn	Tmem8b
Palb2	Kif1a	Fam131c
Tln2	Gprc5c	Myorg
Fbxo43	Ebf4	Pramel19
Fam186b	Adam11	Tmem235
Alg6	Ank1	Tcp11
Dscaml1	Nav2	Dennd2d
Doxl1	Serac1	Kif26a
Tbc1d4	Zfp661	Ndufa4l2
Fam217b	Cdc25b	Tox2
Prr19	Cdkn1a	Pik3c2b
Tmem236	Atg16l2	Arhgap44
C2cd4b	Lrrc73	Duox1
Myo5c	Ubap1l	Ajap1
Zkscan2	Ngef	Shisal2a
Dnah2	Idh1	Ctag2l1
Slc9a5	Nedd9	Tmem35b
Plekhg4	Kcnip3	Zkscan16
Cul9	Chrm1	Sh2d5
Dgkh	Aldh3a1	Pnma8b
L3mbtl1	Zfp607b	Fbxo39
Adgrd1	Arhgef16	Cyp2t4
Lrrc7	Cacna1g	Otof
Cystm1	Nemp1	Wfikkn1
Chd5	Fam214a	Zbtb42
Ctcfl	Plch2	Tmem221
Tbc1d31	Ebf3	Mkrn2os
Prss33	Tec	Prrt4
Lrr1	Col2a1	Akap5
Plb1	Isg20	Slc35g2
Agmat	Stxbp1	Fam71f2
Unc13b	Pabpc1l	Clec2l
Fndc1	Syt3	Susd5
Galnt16	Fam189a2	Gpr25
Chrna10	Cdhr5	Tmem233
Rbm24	Slc16a10	Isoc2a
Fam184a	Jmjd7	Cnnm2
Ccdc15	Mfsd4a	Col6a6
Fbxo47	Tssc4	Phldb3
Ino80d	Zbtb44	Kif19a
Wdr86	Phlpp2	Zglp1
Plcd4	Fcgbp	Myo15
Ppp2r5c	Nectin4	Ablim1
Sh2b1	Bdh1	Gm11545
Mettl7a3	Rhbdd1	Zfp185
Camta1	Kit	Bach2
Ccnd3	Gm15091	Kazn
Rgs3	Ap3m2	Bcan
Neurl1b	Klhl26	Fam71a
Klhl34	Fyn	Cbfa2t3
Fam43b	Pla2g5	Trpc2
Zfp800	Gm7168	Rnft2
Tomt	B3galt5	Nos1ap
Zfp72	Fam178b	Apoc1
Gnb1l	Trp73	Banp
Tmprss9	Mroh7	Cdca2
Dux	Acrbp	Inpp5d
Apol8	Inpp5a	Yif1b
Ankrd63	Meioc	Hpn
Rnf144a	Sec14l5	Kif1a
Sh3d19	Ano3	Gprc5c
Efr3b	Cyld	Ifnar2
Pigyl	Opn4	Ebf4
Spint2	Psen2	Adam11
Sdr39u1	Epb41	Dnpep
Ptpru	Tm9sf5	Serac1
Lhx6	Igsf9b	Cd59a
Mboat2	Tnnt2	Comt
Disp3	Sgce	Atg16l2
Ttll9	Best2	Rad51ap2
Pars2	Lpin1	Lrrc73
Slc12a8	Hdac6	Ubap1l
Fetub	Sema6b	Ngef
Nr3c2	Tcn2	Idh1
Kdf1	D630003M21Rik	Kcnip3
Scn3b	Pttg1	Chrm1
Rbck1	Rfesd	Kcnc1
Tle3	Iqsec1	Arhgef16
Myh7b	Gpr160	Cacna1g
Steap3	Megf11	Nemp1
Pramel24	Nxpe3	Chn1
Ndufaf6	Plcxd2	Fam214a
Cisd3	Smim17	Plch2
Ppp1r3d	Klf14	Fggy
Zbtb34	Il34	Rnf13
Tmem8b	Iho1	Ppara
Myom3	Ly6h	Amn1
Fam131c	Gfra4	Tec
Myorg	Tph1	Col2a1
Pramel19	Inafm1	Isg20
Slc2a7	Gcnt1	Stat5b
Tmem235	Fer1l4	Stxbp1
Tcp11	Nkain4	Pabpc1l
Mpzl3	Zfp937	Mtcl1
Dennd2d	Fbrsl1	Fam189a2
Kif26a	Nemp2	Slc25a53
Zbtb3	Arhgap45	Shtn1
Ndufa4l2	Atat1	Cdhr5
Tox2	Mindy4	Ccpg1
Pik3c2b	Tent5c	Slc16a10
Arhgap44	Frrs1l	Gm15127
Duox1	Lrrc27	Jmjd7
Ajap1	Fam13c	Mfsd4a
Shisal2a	Insyn2a	Kmt5c
Tmem35b	Ppfia4	Tssc4
Zkscan16	Vwa5b2	Zbtb44
Sh2d5	Rfpl4	Phlpp2
Rnf39	Gm13889	Fcgbp
Myh3	Btbd18	Nectin4
Pnmal2	Akain1	Bdh1
Fbxo39	6430550D23Rik	Rhbdd1
Dnajc28	Kcnt1	Kit
Zscan4d	Armh1	Gm15091
Otof	Mak	Ap3m2
Bicral	Adtrp	Klhl26
Pnma5	Ddx4	Fyn
Mkrn2os	Tiam1	Lepr
Prrt4	Pianp	Pla2g5
Akap5	Thap3	Cdc14b
Zfp267	Ttc39a	Eif4a2
Pabpc4l	Ndrg2	Fam178b
Mrap2	Cadm2	Trp73
Fam71f2	Pdzk1	Mroh7
Clec2l	Fbxo34	Acrbp
Susd5	Hk1	Sirt3
Gpr25	Msh5	Inpp5a
Tmem233	Smoc1	Ccn6
Isoc2a	Pdgfrb	Meioc
Calml4	Rbm46	Sec14l5
Cnnm2	Sbk2	Cyld
Alkbh1	Smtn	Opn4
Col6a6	Itih4	Psen2
Kif19a	Grid2ip	Epb41
Zglp1	Gaa	Tm9sf5
Myo15	Casz1	Tnnt2
Ablim1	Ube2v2	Sgce
Vmn2r90	Dusp15	Best2
Gm11545	Rbp4	Lpin1
Zfp185	Grip2	Hdac6
Aqp8	Shd	Sema6b
Bach2	Adcy3	Tcn2
Kazn	P2rx6	Nucb2
C2cd5	Lnx1	D630003M21Rik
Cenpw	Lrrc57	Pttg1
Bcan	Nek6	Iqsec1
Cbfa2t3	Atp6v1c2	Gpr160
Trpc2	Crybb3	Megf11
Rnft2	Proser2	Nxpe3
Mdfi	Ppp1r16b	Il9r
Nos1ap	Rsph6a	Tdrd5
Apoc1	Tfap2c	Klf14
Banp	Rab17	Il34
Ppih	Nr5a2	Iho1
Cdca2	Kctd18	Ly6h
Inpp5d	Mab21l4	Gfra4
Yif1b	Gjb3	Tph1
Lnpk	Foxg1	Rtkn
Hmbs	Cgref1	Inafm1
Hpn	Klhdc7b	Gcnt1
Ttk	Plekha6	Fer1l4
Abhd14a	Nfasc	Ctnnbip1
Zscan4f	Megf8	Tmem230
Gprc5c	Gstm4	Alg12
Tmem87a	Cd300lg	Fbrsl1
Adam11	Timd2	Nemp2
Pclo	Vldlr	Cfb
Dnpep	Eda2r	1110065P20Rik
Serac1	Islr2	Lrrc9
Zfp661	Tmem184a	Atat1
Cdc25b	Efcab6	Mindy4
Sprtn	Tgm1	Tent5c
Lrrc73	Tap1	Frrs1l
Ubap1l	Palm	Lrrc27
Wdfy1	Galnt6	Fam13c
Ngef	Cblc	Insyn2a
Kcnip3	Sgk1	Ppfia4
Chrm1	Taf7l2	Vwa5b2
Aldh3a1	Fam166b	Rfpl4
Arhgef16	Efna1	Gm13889
Bub1	Stra6	Btbd18
Naca	Parvg	Akain1
Nemp1	Sh3d21	1500009L16Rik
Odf2	Stk32c	Kcnt1
Plch2	Nrip2	Smim20
Boll	Ttbk1	Lrrc74b
Ppara	Fam183b	Armh1
Frrs1	Syce3	Mak
Col2a1	Mdm1	Lrp4
Isg20	Susd2	Adtrp
Ltbp4	Dennd4a	Ddx4
Cutc	Pkp3	Pianp
Stat5b	Rpl10l	Thap3
Mtcl1	Hif3a	Ndrg2
Syt3	Sgsm1	Dlgap2
Fam189a2	Crybg2	Atg4c
Cdhr5	Lrrc51	Zfp444
Ccpg1	Megf6	Als2cl
Nedd4l	Ccdc81	Hexdc
Jmjd7	Pkd2l2	Hk1
Mfsd4a	Hcrtr1	Msh5
Kmt5c	Ppp1r36	Pdgfrb
Tssc4	Elf3	Cnp
Zbtb44	Pcsk5	Rbm46
Phlpp2	Shisal1	Sbk2
Fcgbp	Begain	Tlcd3b
Eif1ad3	Otud6a	Eng
Nectin4	Fgfr3	Chpt1
Bdh1	Nqo2	Smtn
Kit	Zbtb5	Itih4
2310022A10Rik	Coq8a	Grid2ip
Pnpla6	Atp2a3	Gaa
Klhl26	Inka2	Casz1
Lepr	Mapk8ip3	Dusp15
Pla2g5	Mttp	Gjc1
Cdc14b	Cyp2d22	Rbp4
B3galt5	1810010H24Rik	Grip2
Eif4a2	Neurl1a	Macroh2a1
Fam178b	Itpripl1	Igfbp7
Pramel16	Prph	Shd
Pramel21	Plxdc1	Wdr35
Trp73	Sult6b1	Cox7a2l
Mroh7	Wnt7b	Adcy3
Acrbp	Osbpl3	Lnx1
Sirt3	Nkd1	Lrrc57
Ccn6	Pnpla2	Hagh
Meioc	Cacna1h	Scmh1
Sec14l5	Ush1c	Nek6
Tspan32	Camsap3	Atp6v1c2
Opn4	Brme1	Crybb3
Tm9sf5	Rab37	Proser2
Tnnt2	6430548M08Rik	Ppp1r16b
Best2	Tcf19	Tfap2c
Lpin1	Odad3	Rab17
Hdac6	Ppp1r10	Kctd18
Hpca	Stat5a	Mab21l4
Srrm1	Bcap29	Tmem9
D630003M21Rik	Kalrn	Cgref1
Pttg1	Dpys	Klhdc7b
Gpr160	Sipa1	Plekha6
Megf11	Ablim3	Nfasc
Nxpe3	Pdzk1ip1	Serp2
Prr23a1	Sec22c	Ccdc112
Prr23a2	Vill	Gstm4
Smim17	Cdpf1	Cd300lg
Il34	Arhgap8	Timd2
Iho1	Trappc9	Rin3
Ly6h	9530053A07Rik	Nxt2
Cntfr	Catsperg1	Eda2r
Cpne6	Trank1	Islr2
Dpp6	Dnah6	Tmem184a
Gfra4	Zfp229	Efcab6
Tph1	Hspb2	Tap1
Poli	Robo3	Siva1
Rtkn	Map3k20	Palm
Gcnt1	Coro2a	Fmo5
Fer1l4	Bend4	Galnt6
Rbl1	Slc52a3	Cblc
Ctnnbip1	P2rx2	Taf7l2
Tmem230	Dcaf4	Fam166b
Tpx2	Rgs9	Efna1
Alg12	Trim45	Dtnb
Zfp937	Ccdc74a	Mroh1
Spdya	Dmkn	Mpst
Fbrsl1	Cspg5	Parvg
Nemp2	Fam219b	Sh3d21
Lrrc9	Ptp4a3	Nrip2
Eif4a3l1	Rab3a	Rab11fip3
Atat1	Spock1	Syce3
Slc6a8	Vmac	Tmem217
Zfp949	Slc39a11	Mdm1
Tent5c	Sec14l1	Susd2
Frrs1l	Fmr1nb	Dennd4a
Syce1	Dynlt1a	Nudt17
Insyn2a	Large2	Hif3a
Ppfia4	Klhl33	Sgsm1
Vwa5b2	Rhbdf2	Crybg2
2810459M11Rik	Sirt4	Lrrc51
Rfpl4	Wipf3	Megf6
Gm13889	D6Ertd527e	Ccdc81
Btbd18	Atp2b4	Fyb2
Akain1	Fam83h	Eml2
1500009L16Rik	Tinagl1	Micos10
6430550D23Rik	Dynll2	Gprasp2
Sult6b2	Pdcd4	Hcrtr1
Kcnt1	Ncmap	Adgre5
Lrrc74b	Zdhhc24	Ppp1r36
Armh1	Enpp5	Pcsk5
Mak	C2cd4c	Shisal1
Lrp4	Endou	Begain
Adtrp	Cd300lf	Plekhb1
Ddx4	Ube2h	Fgfr3
Nat8f4	Prkag2	Cmip
Cdin1	Rnf144b	Zbtb5
Pianp	Elmod2	Coq8a
Thap3	Trim36	Pgap1
Zfp691	Trim66	Atp2a3
Ttc39a	Dbndd1	Agpat1
Ndrg2	Abat	Mapk8ip3
Dlgap2	Nod1	Mttp
Atg4c	Il4i1b	Abi3
Rwdd2a	Obscn	Rhpn1
Als2cl	Cuedc1	Cyp2d22
Hk1	Hck	Neurl1a
Msh5	Arid5a	Pfkm
Clcnka	Fxyd4	Ppfibp2
Rbm46	Rlbp1	Prph
Sbk2	Cacna2d2	Nhsl1
Tlcd3b	Map3k9	Plxdc1
Eng	Septin6	Etfrf1
Smtn	Cebpzos	Satb1
Itih4	Mroh4	Wnt7b
Cacnb1	Zfp516	Osbpl3
Grid2ip	Gm7030	Nkd1
Casz1	Zkscan7	Cacna1h
Ube2v2	Gng12	Fbxo6
Polq	Slc10a1	Ush1c
Dusp15	Slc8b1	Nlrx1
Gjc1	Slc45a3	Pde9a
B3gnt5	Gal3st1	Rab37
Rbp4	Ablim2	6430548M08Rik
Ppm1b	Clcc1	Tcf19
Esrrb	Afap1l2	Odad3
Grip2	Otub2	Ppp1r10
Shd	Aamdc	Stat5a
Wdr35	Prdm16	Homer2
Itgb6	Mrps36	Bcap29
Lnx1	Gpr155	Tnfrsf19
Lrrc57	C1qtnf5	Fbxl16
Pigp	Mfrp	Chadl
Hagh	Tmem132b	Marchf5
Nek6	Kcng2	Erlin1
Atp6v1c2	Caly	Atp13a2
Slc44a1	Bend7	Bcas1
Crybb3	Gne	Mipol1
Proser2	Dmpk	Sipa1
Ppp1r16b	Dcaf12l1	Ablim3
Rsph6a	Ddx19b	Zfyve27
Nectin2	Kif17	Dap3
Rab17	Lysmd4	Pdzk1ip1
Nr5a2	Morc4	Sec22c
Kctd18	Cldn7	Egfl7
Mab21l4	Ndrg4	Vill
Ralgps2	Nuak2	Pwwp3b
Cldn10	Pag1	Trappc9
Tmem9	Acp4	9530053A07Rik
Cgref1	Tmc8	Catsperg1
Klhdc7b	Ccer2	Trank1
Plekha6	Cfap73	Zfp229
Nfasc	Foxl3	Mpp4
Svip	Gm3336	Hspb2
Grm2	Gfy	Robo3
Rnf152	Tgfbr3l	Map3k20
Ccdc112	Kifc1	Slc38a10
Gstm4	Gm5741	Coro2a
Triml2	Ccdc170	Bend4
Cd300lg	Tmem95	Slc52a3
Timd2	Fam181a	P2rx2
Nxt2	Gm5901	Dcaf4
Eda2r	Gprc5b	Rgs9
Islr2	Aatk	Nsun6
Tmem184a	Sfmbt2	Trim45
Cdc45	Adgrg1	Ccdc74a
Efcab6	Gm7694	Mgll
Tgm1	Trp53inp1	Cspg5
Siva1	Gpsm1	Fam122b
Gm15455	Slc44a2	Marchf1
Cblc	Eva1c	Ptp4a3
Taf7l2	Slc38a3	Rab3a
Fam166b	Tex14	Vmac
Efna1	Cacng5	Slc39a11
1700012B07Rik	AI987944	Sec14l1
Stra6	Vps37d	Dgkz
Mpst	Adgrb2	Fmr1nb
Parvg	Tac2	Dynlt1f
Troap	Magec2	Dynlt1a
Fam174b	E330021D16Rik	Dynlt1c
Sh3d21	C1qtnf6	Large2
Stk32c	Hdac7	Cep95
Nrip2	Oprk1	Rhbdf2
Syce3	Kcnj11	Sirt4
Mdm1	Reep2	Dennd10
Susd2	Gm11544	Wipf3
Pkp3	Jdp2	Nrg2
Nudt17	Jph2	Zyg11a
Rpl10l	Trim47	D6Ertd527e
Pcx	Scarb1	Atp2b4
Hif3a	Abhd4	Trmt2b
Ccdc138	Nrxn2	Tex11
Sgsm1	Papln	Irak1bp1
Crybg2	Fam234a	Fam83h
Lrrc51	2610528A11Rik	Tinagl1
Megf6	Shisa8	Dynll2
Ccdc81	Rnf223	Pdcd4
Fyb2	Tspan2	Ncmap
Eml2	Cacfd1	Zdhhc24
Pkd2l2	Zfp383	Sarm1
Micos10	Zkscan8	Enpp5
Gprasp2	Ggnbp1	C2cd4c
Hcrtr1	Cacna1a	Ccdc127
Adgre5	Greb1	Endou
Ppp1r36	Tmem106c	Cd300lf
Elf3	Amz2	Ube2h
Shisal1	Rundc3a	Tmem229b
Begain	Ptprs	Prkag2
Plekhb1	Prkd2	Rnf144b
Otud6a	Cyfip2	Elmod2
Fgfr3	Cpt1c	Rbm20
Birc7	Tjap1	Dbndd1
Zbtb5	Inca1	Abat
Susd1	D430019H16Rik	Nod1
Coq8a	Cpeb1	Obscn
Atp2a3	Sh2d3c	Hck
Fignl1	Matn4	Dis3l2
2700049A03Rik	Oprl1	Fam221a
4930579F01Rik	Cars	Cacna2d2
Coa8	Cdh23	Camk2b
Mapk8ip3	Kcnab2	Map3k9
Mttp	Serinc2	Rasgrp4
Abi3	Elmod3	Septin6
Rhpn1	Slc12a4	Cebpzos
Cyp2d22	Tmem184b	Usp35
1810010H24Rik	Irx3	Zfp516
Neurl1a	Scn5a	Zkscan7
Arhgap19	Tmem205	Npffr1
S100a14	Prkar1b	Gng12
Pgam5	Sez6l	Slc8b1
Lrrcc1	Bmp8a	Ak4
Prph	Hsf4	Slc45a3
Plxdc1	Myo7a	Gal3st1
Sult6b1	Sun1	Ablim2
Etfrf1	Fsbp	Tsc22d1
Satb1	Rad54b	Clcc1
Cfap70	Epha10	Ahi1
Chn2	Zfp811	Rgs20
Nkd1	Kcnj12	Afap1l2
Cacna1h	Mical3	Rapgef3
Fbxo27	Bin2	Otub2
Dnaaf4	Prob1	Aamdc
Ush1c	Ifitm7	Prdm16
Pde9a	Calcoco2	Tfdp2
Brme1	Cbs	Rhox13
Rab37	Sorbs3	Psrc1
Tcf19	Ager	Tmem132b
Wdr90	Scube1	Kcng2
Tmprss3	Clip4	Caly
Odad3	Chka	Bend7
Ppp1r10	Myh14	Ddah2
Tbc1d24	Slc4a9	Dcaf12l1
Homer2	Sec1	Ddx19b
Bcap29	Ackr3	Kif17
Pias2	Gja3	Lancl1
Mtm1	Pgf	Ndfip2
Phf11c	Add2	Lysmd4
Ccser1	Ano7	Morc4
Marchf5	B3gnt9	Cldn7
Erlin1	Eya2	Galns
Cep55	Acta1	Ndrg4
Bcas1	Cyhr1	Pag1
Mipol1	Epc1	Acp4
Dpys	Kcnip2	Tmc8
Sipa1	Spns2	Cfap73
Ablim3	Ebf2	Foxl3
Akap11	Slc17a5	Gm3336
Dap3	Cited1	Gfy
Pdzk1ip1	Arc	Tgfbr3l
Sec22c	Tbxa2r	Kifc1
Egfl7	Foxn1	Dclk2
Vill	Dazl	Camta1
Zfp961	Fkbp6	Ccdc170
Cdpf1	Tnnt1	Gprc5b
Arhgap8	Ecel1	H2-Q7
Pwwp3b	Lamb3	Map7
Trappc9	Rad51d	Aatk
Catsperg1	Snap91	Ccpg1os
Trank1	Disp1	Coch
Dnah6	Dmc1	Adgrg1
Zfp229	Mroh2a	Gm7694
Mpp4	Syngap1	Trp53inp1
Hspb2	Ace	Spc25
Robo3	Anxa8	Gpsm1
Adamts20	Sema4d	Ascc1
Eomes	Glrb	Slc38a3
Coro2a	Rasal1	Tex14
Bend4	Rbl2	Cacng5
Slc52a3	Tekt1	Pnck
P2rx2	Cnga3	Ei24
Dcaf4	Cyb561a3	Pkn1
Majin	Deaf1	Vps37d
Rgs9	Tjp3	Adgrb2
Nsun6	Artn	Magec2
Trim45	Tmem201	2410004P03Rik
Dcaf17	Septin4	H2-Q9
Tmem215	Crabp1	Hdac7
Slc4a5	Chit1	Cyp4f14
Ccdc74a	Tcf24	Oprk1
Dmkn	Tbx1	Kcnj11
Zfp712	Wnt11	Reep2
Mgll	B4galt4	Reep6
Cspg5	Grk3	Cep85l
6030458C11Rik	Tmem53	Jdp2
Fam219b	Paqr7	Jkamp
Fam122b	Trim3	Jph2
Ptp4a3	D630023F18Rik	Scarb1
Rab3a	Podn	Abhd4
Spock1	Ghrl	Nrxn2
Vmac	AI593442	Arhgap27
Slc39a11	Rcan2	Thsd1
Sec14l1	Pacsin1	Papln
Dgkz	Tspear	Gramd4
Dynlt1f	Sct	Fam234a
Dynlt1a	Rskr	Usp44
Dynlt1c	Lrit3	Shisa8
Large2	Mdm2	Fignl2
Klhl33	Crhr2	Rnf223
Cep95	Arid3a	Gm11837
Cfap77	Atp9a	Tspan2
Spata31d1b	Sox17	Cacfd1
Rhbdf2	Papss1	Zfp383
Sirt4	Exoc3l4	Ggnbp1
Rad18	Tfr2	Cacna1a
Chchd6	Hormad1	Greb1
Wipf3	Radil	Tmem106c
Nrg2	Psd2	Amz2
Zyg11a	Zap70	Rundc3a
1110032F04Rik	Btn2a2	Prkd2
Tex11	Pxylp1	Cyfip2
Mtbp	Sidt2	Cpt1c
Fam83h	Arhgap33	Tjap1
Arhgap39	Arntl2	Cmtm7
Sugp2	Prrt3	Marchf2
Ccdc125	Mturn	Inca1
Pdcd4	Poln	D430019H16Rik
Ncmap	Ccdc63	Cpeb1
Zdhhc24	Per3	Llgl2
Sarm1	Ccdc169	Ciz1
Kcns3	Nudt7	Sh2d3c
C2cd4c	Shisa7	Gstz1
Ccdc127	Plppr2	Matn4
Gtse1	Ism2	Oprl1
Endou	Wnk2	Cars
Cd163	Igdcc4	Cdh23
Rnf144b	Vsig10l	Hrh1
Elmod2	Slc26a8	Kcnab2
Lrrc36	Zfand4	Serinc2
Rbm20	Esrp1	Elmod3
Dbndd1	Mybl1	Slc12a4
Abat	Atp1a3	Tmem184b
Mal	Klhl13	Scn5a
Obscn	Tmem91	Tmem205
Actl10	Dolpp1	Apbb1
Bdh2	Lrriq4	Prkar1b
Lrrc56	Mospd2	Sez6l
Dis3l2	Blvrb	Efcab15
Fam221a	Acer2	Echdc2
Olfr376	Tek	Rnf128
Fxyd4	Ttc16	Bmp8a
Rlbp1	Syne4	Hsf4
Cacna2d2	Ralgps1	Myo7a
Camk2b	Ppp1r3f	Mib2
Map3k9	Gapdhs	Sun1
Rasgrp4	Lhx2	Fsbp
Septin6	Scml2	Rad54b
Klk11	Cd302	Prdm2
Cebpzos	Kcnc3	Epha10
Mroh4	Becn2	Usp17le
Zfp516	Tenm2	Zfp811
Mymx	Pde10a	Kcnj12
Plekhd1	Osbpl6	Mical3
Zkscan7	Tmx2	Gm19345
Trim61	Ephb2	Bin2
Slc10a1	Sec24a	Calcoco2
Eif1ad8	Wdr45	Cbs
Eif1ad4	Inpp4a	Ankra2
Slc8b1	Col17a1	Sorbs3
Slc5a6	Wdr76	Ager
Ect2	Trim11	Gabpb1
Slc45a3	Clstn1	Scube1
Gal3st1	Usp29	Clip4
Ablim2	Tekt5	Myh14
Tsc22d1	Astl	Cdc7
Clcc1	Lzts3	Ackr3
Fbxw7	Grm4	Gja3
Afap1l2	Usp43	Gja5
Rapgef3	Syngr4	Pgf
Otub2	Aifm3	C8g
Igsf5	Snph	Ano10
Aamdc	Fgf11	Ano7
Rpgr	Apba2	B3gnt9
Prdm16	Sez6	Eya2
Tfdp2	Nmb	Arvcf
Rhox13	Misp3	AA414768
Zscan4b	Chrdl2	Acta1
Psrc1	Art5	Tle5
Gpr155	Dido1	Ampd3
Tmem132b	Hmgcs1	Cyhr1
Kcng2	Map4k2	Epc1
Caly	Dsc3	Kcnip2
Bend7	Rhbdf1	Spns2
Ddah2	Adcy9	St6galnac4
Dcaf12l1	Plpp5	Slc17a5
Ddx19b	Tuft1	Slc19a2
Kif17	Rorc	Cited1
Lancl1	Tm6sf2	Arc
Ndfip2	Tmem161a	Fer1l5
Ddx43	Ngb	Gm867
Lysmd4	Apela	Tbxa2r
Cldn7	Kctd19	Foxn1
Pag1	Nrn1l	Dazl
Acp4	Capn5	Fkbp6
Tmc8	Gab1	Ecel1
Ccer2	Apod	Lamb3
Cfap73	Tspan33	Rad51d
Foxl3	Vsx2	Sh3gl3
Nek10	Adamtsl4	Snap91
Gm3336	Dnm1	Ube2t
Gfy	Irf8	Disp1
Tgfbr3l	Azin2	Dmc1
Kifc1	Erg	Mroh2a
Dclk2	Acsl1	Ace
Gm5741	Lmo1	Csmd2
Ccdc170	Aktip	Glrb
Nuggc	Cnih2	Rasal1
Gm5901	Cbln2	Rbl2
Rgs22	Phf1	Cnga3
Gprc5b	Acy3	Cyb561a3
Map7	Gzmm	Deaf1
Aatk	Osbp2	Tjp3
Ccpg1os	Eno2	Gm15816
Adgrg1	Elmo2	Artn
Gm7694	Ldhb	Tmem201
Trp53inp1	Mdm4	Septin4
Spc25	Sh2b2	Crabp1
Ascc1	Aldoc	Chit1
Slc38a3	Slc9a8	Calu
Sptbn4	Ppp3cc	Tcf24
Tex14	Ccna1	Cbfa2t2
Cacng5	Mad2l2	Mapt
AI987944	Ntng2	Tbx1
Pnck	Limk1	Mknk1
Vps37d	Ggt1	Wnt11
Adgrb2	Adipor1	B4galt4
Tac2	Car12	Grk3
Magec2	Trim68	Tmem53
E330021D16Rik	Cutal	Trim3
Cyp4f14	Hhipl2	D630023F18Rik
Oprk1	Nadsyn1	Ubxn10
Kcnj11	Sema4f	Fez2
Reep2	Gpr50	Lyrm1
Gm11544	Lrrc31	Prc1
Scarb1	Gm45929	Stx2
Nrxn2	Tmem218	Mllt3
Kat6b	Synpo2l	Lox
Tmem39a	Mei1	Dao
Papln	Pde4c	Ghrl
2610528A11Rik	Asic3	AI593442
Shisa8	Bend6	Rcan2
Fignl2	Osbpl7	Pacsin1
Rnf223	Mapre3	Camk2a
Fam160a2	Ankrd23	Pla2g12a
Zfp976	Khk	Tspear
Bcat2	Scrib	Sct
Cep57l1	Paqr6	Alpl
C87436	Lgi2	Rskr
Zfp383	Gata4	Lrit3
Ggnbp1	Crispld2	Mst1r
Cacna1a	Zfp442	Mdm2
Greb1	Ccdc122	Crhr2
Tmem106c	Rassf6	Arid3a
Amz2	Igfbp2	Atp9a
Pan2	Usp37	Papss1
Rundc3a	Lrcol1	Tfr2
Slc25a19	Pde4a	Hormad1
Cyfip2	Tex26	Amph
Mlst8	Glb1l2	Pomgnt2
Cpt1c	Ankrd61	Mpv17l
Tjap1	Dixdc1	Spata7
Slc30a6	Lingo1	Radil
Cmtm7	Tmem209	Psd2
Inca1	Rassf5	Tfcp2
D430019H16Rik	Hoxa1	Zap70
Zfp82	Elovl2	Pxylp1
Slco2b1	Trpc1	Fhod3
Llgl2	Celf5	Sidt2
Gstz1	Unc5a	Arhgap33
Rad51b	Il12rb2	Nxf2
Matn4	Sema3f	Mturn
Cars	Ctsh	Ccdc63
Cdh23	Kcnn2	Nanog
Hrh1	Hnf4a	Palb2
Smc5	Cux2	Cox6b2
Serinc2	Ephx1	Per3
Elmod3	Pkp1	Csnk1e
Smim22	Asgr2	Pld6
Scn5a	Crhr1	Shisa7
Tmem205	Krt19	Plppr2
Mtf2	Aldh6a1	Ism2
Sez6l	Ppp1r1b	Wnk2
Efcab15	Rdh12	Igdcc4
Echdc2	Mpz	Slc26a8
Zfp850	P4ha1	Zfand4
Bmp8a	Prkcb	Mybl1
Hsf4	Sh3bp1	Relb
Gm5141	2810408A11Rik	Atp1a3
Mib2	Nudt14	Tmem91
Sun1	Prxl2a	Zer1
Fsbp	Rasgef1a	Mid1
Prdm2	Kdsr	Lrriq4
Epha10	Cish	Slc31a2
9030624G23Rik	Pld3	Blvrb
Zfp995	Dsc2	Map3k10
Usp17le	Col5a3	Acer2
Kcnj12	Col11a2	Ttc16
Mical3	Tecta	Ralgps1
Gm19345	Hspa12a	Ppp1r3f
Bin2	Adamts10	Prickle3
Ifitm7	Gal	Atp4a
Calcoco2	Gpx3	Lhx2
Cbs	Rhod	Scml2
Ankra2	Itga7	Cd302
Ager	Fuca2	Becn2
Gabpb1	Gdf15	Pde10a
Scube1	Adora2a	Suv39h1
Clip4	Hyal1	Osbpl6
Chka	Rnf181	Tmx2
Myh14	Trappc6a	Ephb2
Slc4a9	Ucn	Tbc1d9b
Aire	Mag	Ldlrad3
Cdc7	Phf24	Ppp1r14d
Tktl2	Frmd4b	Inpp4a
Sec1	Clstn3	Haus2
Gja3	Col26a1	Col17a1
Pgf	Fbxl21	Cpeb3
C8g	Ccdc28a	Clstn1
Ano7	Plekhh3	Usp29
B3gnt9	Hid1	Astl
Eya2	Abca7	Nphp1
Sema6c	Fbln1	Grm4
Arvcf	Slc4a8	Usp43
AA414768	Plk5	Syngr4
Ada	Acot11	Aifm3
Tle5	Atp6v0e2	Fgf11
Epc1	Mbd6	Asgr1
Kcnip2	Bicc1	Tlcd2
Spns2	Pcbp3	Apba2
Rad21l	Usp48	Pcsk6
Ahsg	Slc30a3	Myo18a
Slc17a5	Podxl2	Kif7
Slc19a2	Jakmip1	Sez6
Cited1	Atp6v1g2	Nmb
Arc	Cckar	Misp3
Gm867	Aig1	Chrdl2
Zbtb24	Ulk1	Art5
Zmat4	Abcc10	Prkcg
Tbxa2r	Mmab	Rad51c
Foxn1	Rab15	Birc2
Adck1	Crb3	Adcy9
Gm11238	Arhgap28	Kyat3
Dazl	Peli3	Ctbs
Fkbp6	Rab3il1	Polr3gl
Tnnt1	Trim7	Plpp5
Ecel1	Ccser2	Tuft1
Lamb3	Nyap1	Tm6sf2
Rad51d	Nkd2	Tmem161a
Sh3gl3	Ifitm10	Agbl5
Itga6	Slc8a2	Ccdc130
Snap91	Lmntd2	Ngb
Ube2t	Polk	Apela
Dmc1	Dcxr	Kctd19
Cryaa	Npb	Nrn1l
Mroh2a	Stard4	Capn5
Ace	Tbc1d16	Cyba
Csmd2	Lmo7	Hsdl2
Glrb	Mxra7	Tspan33
Rasal1	Ybx2	Slc7a1
Tekt1	Bcl6	Adamtsl4
Cnga3	Kank1	Ccr7
P2ry1	Pycr1	Fdx1
Cyb561a3	Dok7	Dnm1
Deaf1	Yjefn3	Ptpdc1
Tjp3	Gm10509	Irf8
Pcnt	Rcn3	Azin2
Cobl	Ckmt1	Acsl1
Artn	Ext2	Lmo1
Tmem201	Fkbp7	Aktip
Septin4	Gata3	Cnih2
Chit1	Paqr8	Cbln2
Tcf24	Slc6a9	Phf1
Cbfa2t2	Garnl3	Acy3
Tbx1	Zbtb7b	Gzmm
Rps6ka1	Slco4a1	Osbp2
Ildr1	Gata2	Elmo2
Wnt11	Gyg	Ldhb
B4galt4	Mapkbp1	Mdm4
Grk3	Epb41l4b	Kcnq2
Osgepl1	Extl1	Sh2b2
D630023F18Rik	Naga	Qsox2
Zmym6	Tmprss6	Aldoc
Dapk1	Prokr1	Senp7
Ubxn10	Klf15	Slc9a8
Prc1	Bcl2l14	Arf2
Unk	Pramel12	Col13a1
Ghrl	Syt2	Ppp3cc
Atl2	Slc45a1	Ccna1
Xndc1	Nphp4	Mad2l2
Pacsin1	Myl4	Stra6l
Camk2a	Msln	Ggt1
Tspear	Tspan9	Itga3
Sct	Cyp4f16	Car12
Alpl	Zfp46	Mmp11
Kif14	Mpp2	Trim68
Rskr	Map2k6	Cutal
Lrit3	Gstm7	Hhipl2
Crhr2	Vgll4	Nadsyn1
Atp9a	Cyb561	Sema4f
Cd1d2	Pabpc4	Aldh2
Mme	Slc2a8	Porcn
Sox17	Aldh1l1	Gm11715
Tcl1	Kcnc4	Gpr50
Egflam	Susd4	Lrrc31
Tfr2	Srsf12	Mef2bl
Hormad1	Dennd4b	Dpm1
Amph	Snorc	Tmem218
Mpv17l	Tvp23b	Synpo2l
Spata7	Spata2	Mei1
Radil	Agbl2	Ank1
Psd2	Chst1	Pde4c
Tfcp2	Prkaa2	Asic3
Brd8	Crtac1	Asb10
Zap70	Ssh3	Bend6
Btn2a2	Zfp385a	Osbpl7
Fhod3	Slc25a28	Mapre3
Arhgap33	Ppp6r2	Ankrd23
Nxf2	Tmem129	Txndc16
Mturn	Tecpr1	Scrib
Rnf32	Dnajc4	Paqr6
Poln	Rrm2b	Lgi2
Ccdc63	Uba1y	Crispld2
Nanog	Dop1b	Pmvk
Cox6b2	Herpud1	Ccdc122
Per3	Cfap97	Rassf6
Csnk1e	Proz	Igfbp2
Ccdc169	Zdhhc2	Armc9
Pld6	Sorl1	Lrcol1
Shisa7	Tmem38a	Cnksr2
Plppr2	Arih2	Egf
Ism2	Pla2g15	Pde4a
Wnk2	Carmil2	Thap4
Igdcc4	Tmem25	Tex26
Slc26a8	Ubash3b	Glb1l2
Zfand4	Tmem44	Ankrd61
Plcb3	Plekhb2	Dixdc1
Mybl1	P4htm	Lingo1
Snapc4	Pm20d1	Celf6
Usp45	R3hdm1	Tmem209
Atp1a3	Bcl9l	Rassf5
Tmem91	Zbtb7c	Hoxa1
Ttc14	Tbc1d8	Elovl2
Mid1	Abcc8	Celf5
Dolpp1	Nthl1	Unc5a
Lrriq4	Gramd1b	Rnf7
Acer2	Ptprm	1700037H04Rik
Plp1	Zfp40	Bmf
Ttc16	Tdrkh	Dzip1l
Ralgps1	Spdef	Ctsh
Atp4a	Arfgap3	Kcnn2
Gapdhs	Tnfrsf13c	Hnf4a
Lhx2	E130311K13Rik	Cux2
Scml2	Spats1	Ephx1
Tmem14a	Noxo1	Bcap31
Kcnc3	Catsperd	Pkp1
Becn2	Gm1070	Fam3a
Suv39h1	Ttll1	Nos2
Osbpl6	Gm7072	Asgr2
Tmx2	Zfp641	Crhr1
Ephb2	Armh4	Krt19
Sec24a	Fam241b	Aldh6a1
Ppp1r14d	Fam161b	Ppp1r1b
Inpp4a	Cfap300	Rdh12
Haus2	Brd8dc	Tcf7
Col17a1	Nrbp2	Unc119
Cpeb3	Mid2	P4ha1
Wdr76	Slc9a1	Pctp
Trim11	Ikzf4	Prkcb
Tekt5	Elfn2	Sh3bp1
Astl	Septin3	Slc27a3
Pla2g10	Gnaz	2810408A11Rik
Rnf112	Nat14	Nudt14
Lzts3	Relt	Qpct
Usp43	Gna13	Prxl2a
Syngr4	Cmklr1	Kdsr
Foxa2	Slc2a4	Fgg
Aifm3	Fbxo48	Pld3
Fgf11	Svop	Dsc2
Dhx35	Mlxipl	Col5a3
Emilin3	Unc5b	Col11a2
Ptprt	Zfp449	Mmp12
Tlcd2	Pip4k2c	Klk8
Apba2	Nupr1l	Slc6a16
Pcsk6	Rtkn2	Spa17
Myo18a	Tpd52l1	Uty
Kif7	Klhdc8b	Igsf9b
Sez6	Tmem19	Hspa12a
Hnf1b	8030474K03Rik	Clgn
Nmb	Stac3	Gal
Misp3	Adgrb1	Gpx3
Chrdl2	Hscb	Rhod
Art5	Hps4	Itga7
Prkcg	Elapor2	Fuca2
Rad51c	Slc7a4	Poll
Foxred1	Cc2d2a	Gdf15
Birc2	Spag1	Smim8
Kyat3	Ppp2r2c	Abhd6
Nek1	Ccdc60	Adora2a
Polr3gl	Ccdc158	Aldh3a2
Tuft1	Grik5	Alox12
Rorc	Shld2	Hyal1
Tm6sf2	Hmgcr	Rnf181
Tmem161a	Cpne5	C130073F10Rik
Kcnh2	Dkk3	Trappc6a
Cmc4	Mbnl2	Ucn
Ccdc130	Rec8	Mag
Ngb	Slc22a17	Frmd4b
Apela	Dzip1	Ube2q2
Car7	Stard10	Msrb1
Kctd19	Nudt18	Col26a1
Nrn1l	Pidd1	Paox
Capn5	H2-DMa	Evi5l
Gab1	Ocln	Fbxl21
Caprin2	Cab39l	Ccdc28a
Hsdl2	Tmtc4	Plekhh3
Syt14	Slc12a7	Pyy
Tspan33	Rgs14	Hid1
Slc7a1	Prss23	H2az2
Vsx2	Susd3	Abca7
Fdx1	Csrp1	Fbln1
Azin2	Brd3os	Slc4a8
Dlgap3	Ccp110	Plk5
Cenpa	Msc	Vamp4
Erg	Sil1	Acot11
Lmo1	Prox1	Atp6v0e2
Tmem138	Pla2g2f	Dynlt2b
Aktip	Kif27	Slamf7
Nfe2	Gramd3	Bicc1
Cbln2	Gpa33	Gucd1
Acy3	Dglucy	Pcbp3
Gzmm	Arhgap26	Nipal3
Osbp2	Gm18905	Usp48
Mdm4	Gm15246	Fbxo25
Qsox2	Itgae	Slc30a3
Agfg2	Epn3	Podxl2
Aldoc	4933427D14Rik	Jakmip1
Hus1	Myh7	Cckar
Slc9a8	Tdrp	Ulk1
Stil	Slain1	Abcc10
Col13a1	Hpcal1	Mmab
Pex26	Tmem63c	Crb3
Plekha7	Zfp248	Arhgap28
Ccna1	Pdk2	Peli3
Dtl	Fam234b	Slc6a12
Pigo	Tarm1	Dcbld1
E2f2	Gdpd5	Ndufb8
Mad2l2	Syt17	Akap7
Cenpi	Slc22a21	Lama3
Bckdhb	Atad2b	Stard3nl
Arx	Tert	Mettl27
Ggt1	Otop2	Nyap1
Itga3	Sncb	Nkd2
Car12	Klhl3	Ifitm10
Mmp11	Gm550	Slc8a2
Trim68	Pacs1	Polk
Hhipl2	Slc22a5	Dcxr
Nadsyn1	Slc34a3	Npb
Zfp51	Duox2	Stard4
Sema4f	Camkk1	Tbc1d16
Gm27021	Dgke	Lmo7
Aldh2	Rnf212	Fam53b
Porcn	Ggt7	Mxra7
Mtrr	Hmx1	Ybx2
Gm11715	Afmid	Bcl6
Gpr50	Odad4	Kank1
Lrrc31	Rasl10a	Ksr1
Gm45929	Kdr	Pycr1
Dpm1	Sfi1	Dok7
Tmem218	Sp6	Yjefn3
Zfp119b	Fam161a	Rcn3
Synpo2l	Rnf43	Lcmt1
Mei1	Clcn1	Map4k1
Ank1	Wnt7a	Entpd6
Pde4c	Ethe1	Ckmt1
Asic3	Letm2	Ext2
Asb10	Piwil2	Gata3
Bend6	Mlycd	Paqr8
Ankle1	Tmem184c	Mcee
Osbpl7	Ppp1r3b	Erp44
Ankrd23	Zfp420	Garnl3
Khk	Mlc1	Zbtb7b
Ankrd39	Gnmt	Slco4a1
Scrib	Camkmt	Arl3
Paqr6	Polh	Gyg
Fam126b	Ppargc1b	Mapkbp1
Lgi2	Lims2	Zcchc17
Gata4	Fam71e1	Dnajb5
Zfp606	Calb2	Epb41l4b
Pikfyve	Ldhc	Extl1
AF067061	Tmem59l	Naga
Gm21761	Pex11g	Top1mt
Pmvk	Tdrd12	Tmprss6
Zfp442	Lrrc29	Prokr1
Ccdc122	Mark4	Klf15
Rassf6	Abca2	Pank2
Igfbp2	Katnal2	Pramel12
Usp37	Fgf22	Syt2
Caps2	Coro6	Spidr
Lrcol1	Pcgf5	Slc45a1
Cabp1	Sh2d4b	Nphp4
Cypt3	H2-Q2	Myl4
Cnksr2	Pax2	Tspan9
Gemin8	Arhgef4	Cyp4f16
Egf	Dlec1	Mpp2
Pde4a	Piwil4	Coq3
Tex26	Prdm11	Gstm7
Glb1l2	Runx3	Tmem268
Ankrd61	Secisbp2l	Ssu2
Marchf11	Ermap	Vgll4
Dixdc1	Ece1	Cyb561
Lingo1	Trim62	Oxld1
Celf6	3110040N11Rik	Slc2a8
Tmem209	Exoc3l2	Sec61a2
Mkrn1	Erfl	Aldh1l1
Elovl2	Tle7	Anks6
Celf5	Shoc1	Kcnc4
Unc5a	Iqcn	Snap47
Klhl12	Gm38999	Susd4
1700037H04Rik	Dcst2	Ndufaf1
Bmf	Gm36210	Srsf12
Il12rb2	Percc1	Kyat1
Kcnn2	BC034090	Dennd4b
Hnf4a	Gm5737	Optn
Cux2	Gm28729	Snorc
Ihh	Ccdc188	Tvp23b
Pkp1	Gm29776	Agbl2
Eif2ak3	Rnf212b	Prkaa2
Actg1	Hmcn2	Lgals12
Asgr2	Gm17266	Crtac1
Crhr1	Gm13420	Ssh3
Cd79b	Sptbn5	Zfp385a
Krt13	Lzts1	Slc25a28
Krt19	Emid1	Pgm2
Aldh6a1	Trpv3	Ppp6r2
Ppp1r1b	Pzp	Ppp1r35
Rdh12	Abca4	Tecpr1
Dmd	Adra2a	Dnajc4
Mpz	Adra2c	Asphd2
Etv4	Adrb1	Rrm2b
C8b	Adrb2	Uba1y
Sh3bp1	Adssl1	Eif2s3y
Slc27a3	Akp3	Dop1b
Mapkapk3	Alppl2	Gmppa
2810408A11Rik	Amh	Cfap97
Nudt14	Slc25a4	Proz
Rnf167	Aqp7	Dusp26
Prxl2a	Fxyd2	Zdhhc2
Rasgef1a	Atp2a1	4933405L10Rik
Prss36	Atp7b	Igdcc3
Klk1	Barx1	Sorl1
Frmpd3	Opn1sw	Tmem38a
Klk8	Bik	Arih2
Sntg2	Bmp7	Pla2g15
Rab3d	Bmp8b	Carmil2
Slc6a16	Bnc1	Adhfe1
Suclg2	Btg2	Tmem25
Zfp354a	Car8	Ralgps2
Igsf9b	Capn6	Ubash3b
Hspa12a	Car4	Tmem44
Clgn	Cbx4	Plekhb2
Gal	Cd3e	St3gal6
Gpx3	Cd79a	Pm20d1
Habp2	Cd9	Zbtb7c
Fmo1	Cdh15	Tbc1d8
Poll	Cdh6	Abcc8
Gdf15	Ovgp1	Fez1
Smim8	Cidea	Gramd1b
Zfand1	Col7a1	Olfm2
Tfb2m	Col8a1	Cryz
Abhd6	Col9a2	Ppp2r5d
Adora2a	Cort	Tdrkh
Alox12	Cplx1	Spdef
Hyal1	Crabp2	Arfgap3
Rnf181	Ncan	Tnfrsf13c
C130073F10Rik	Cyp26a1	E130311K13Rik
Trappc6a	Dhcr7	Noxo1
Fam111a	Dhh	Fkbp11
Prr5	Mpp3	Catsperd
Col26a1	Drd4	Gm1070
Fbxl21	Eef1a2	Ttll1
Ccdc28a	Efnb3	Lrrc75a
Pyy	Egfr	Wscd1
Gpr142	Egr1	Letmd1
Hid1	Ell	Ankrd46
Cyp11a1	Eln	Slc38a4
Snx31	Enpep	Armh4
Cfap206	Epha4	Fam241b
H2az2	Epha8	Fam161b
Fbln1	Epx	Cfap300
Slc4a8	Ptprv	Brd8dc
Plk5	Esx1	Slc9a1
Acot11	Ezh1	Ccdc162
Atp6v0e2	Fdxr	Stx7
Dynlt2b	Fgf18	Elfn2
S100pbp	Fgfr4	Gstt1
Pcbp3	Dtx1	Wdr70
Nipal3	B4galnt2	Septin3
Rpl22l1	Gata1	Gnaz
Usp48	Gch1	Zfp14
Spen	Gcnt2	Relt
Zfp654	Gja4	Ift81
Slc30a3	Gpr3	Usp11
Podxl2	Grid2	Gna13
Vwa7	Grin2d	Hap1
Jakmip1	Gstm2	Coprs
Atp6v1g2	Gstm6	Klhl22
Cckar	Guca1a	Slc2a4
Ulk1	Guca2a	Stx1a
Abcc10	Gucy2e	Svop
Mmab	H2-Bl	Mlxipl
Rab15	H2-Oa	Zfp449
Crb3	Hand1	Pip4k2c
Ninj2	Hcn3	Afg1l
Dcbld1	Foxj1	Nupr1l
Ndufb8	Mst1	Rtkn2
Akap7	Hhex	Tpd52l1
Stard3nl	Hmgcs2	Klhdc8b
Nyap1	Hmx3	Tmem108
Tmtc1	Hoxb9	Tmem19
Slc8a2	Hsd17b2	Mtus2
Lmntd2	Hspg2	Mcam
Fbxl3	Htr5a	Bbs4
Polk	Icam5	Fam20c
Cenpx	Igfbp1	8030474K03Rik
Npb	Il2rb	Lrp11
Stard4	Inhbb	Stac3
Lmo7	Itih3	H2-T22
Ybx2	Kcnc1	Hscb
Mylpf	Kcnd1	Hps4
Atxn2l	Kcnk4	Elapor2
Pycr1	Kcnu1	Slc7a4
Dok7	Kcnq1	Mfsd7a
Yjefn3	Kcns1	Spag1
Eif1ad16	Kif5c	Klhl8
Gm10509	Klf3	Ppp2r2c
Lcmt1	Krt4	Ccdc60
Map4k1	L1cam	Ccdc158
Sigirr	Lag3	Grik5
Entpd6	Lama1	Shld2
Ckmt1	Lamb2	Frmd5
Eri2	Lamc2	Polg
Paqr8	Lbp	Rras
Garnl3	Lcat	Hmgcr
Strbp	Lhb	Xrcc1
Bcar3	Lhx5	Morc2b
Mapkbp1	Ltb4r1	Cpne5
Ndrg3	Ltk	Fam107a
Dnajb5	Smad6	Mbnl2
Epb41l4b	Man2b2	Fbxo16
Extl1	Mas1	Rec8
Rps21	Ascl2	Slc22a17
Naga	Mc1r	Dzip1
Dph7	Abcc1	Cgrrf1
Top1mt	Mertk	Stard10
Tmprss6	Mesp2	Caskin1
Klf15	Mmp15	Nudt18
Bcl2l14	Mmp2	Pidd1
Pramel12	Mobp	H2-DMa
Syt2	Msi1	Ocln
Nphp4	Mt2	Cab39l
Myl4	Mtf1	Tmtc4
Slc35d1	Mtnr1a	Acer3
Gpam	Gadd45b	Slc12a7
Ptk6	Myom2	Sympk
Ccdc163	Nbl1	Rgs14
Ssr2	Klk1b3	Chmp2a
Mpp2	Nkx2-3	Tmem14c
Map2k6	Nkx2-5	Csrp1
Coq3	Nkx2-9	Brd3os
Gstm7	Nos1	Ccp110
Btf3l4	Notch1	Il1r2
Ssu2	Notch3	Rprd1a
Cyb561	Npas1	Msc
Pabpc4	Npas2	Sbk1
Dennd2c	Npdc1	Erg28
Oxld1	Dusp8	Sil1
Slc2a8	P2rx1	Pde6d
Sec61a2	Pde8a	Prox1
Aldh1l1	Padi2	Pla2g2f
Kcnc4	Peg3	Kif27
Prpf18	Rhox5	Arhgap26
Susd4	Phka1	Gm15246
Ndufaf1	Pigf	Itgae
Srsf12	Pitx3	Stx8
Kyat1	Plat	Prdm9
Snorc	Serpinf2	Acan
Sult4a1	Phox2a	Tdrp
Pecr	Pou3f3	Slain1
Tvp23b	Ppl	Hpcal1
Ift52	Npy4r	Dmac2l
Agbl2	Prkar2a	Tmem63c
Prkaa2	Prss12	Zfp248
Amhr2	Ptgds	Pdk2
Crtac1	Ptpn14	Herc3
Slc25a28	Ptpn20	Tigd3
Pgm2	Abcd4	Fam234b
Smc4	Rapsn	Wdr54
Ppp1r35	Rasd1	Tarm1
Dnajc4	Rasl2-9	Gdpd5
Rrm2b	Rb1	Syt17
Gtpbp10	Rbpjl	Slc22a21
Uba1y	Rfx2	Rdh11
Eif2s3y	Slc50a1	Atad2b
Dop1b	Mst1r	Lamtor2
Slc25a27	Rrh	Tert
Mettl4	Ryr1	Otop2
Kank3	S100a13	Sncb
Gmppa	Ccl25	Klhl3
Klf8	Cx3cl1	Plaat3
Adat1	Sgca	Gm550
Herpud1	St3gal4	Pacs1
Kcng4	Slc1a1	Pigt
Cfap97	Slc1a6	Slc22a5
Proz	Slc1a5	Slc34a3
Nutf2	Sos1	Duox2
Zdhhc2	Sox1	Dgke
4933405L10Rik	Sox15	Rnf212
1700018B08Rik	Stim1	Nat9
Sorl1	Stra8	Slc35c2
Tmem38a	Tal2	Vps39
Arih2	Tbr1	Hmx1
Carmil2	Tex9	Afmid
Dbt	Tgfb3	Odad4
Adhfe1	Tgm2	Rasl10a
Tmem25	Thrsp	Sfi1
Alg3	Tlx2	Sp6
Tmem44	Pglyrp1	Pdgfa
Cggbp1	Tnfsf9	Fam161a
P4htm	Tnni3	Arhgap10
Pm20d1	Tob1	Rnf43
R3hdm1	Tuba3a	Plpbp
Rbbp5	Tubb2a	Slc35f3
Rnf111	Tubb4a	Clcn1
Zbtb7c	Ucp1	Wnt7a
Tbc1d8	Upk2	Clpb
Pif1	Vdr	Ethe1
Hmgcl	Slc32a1	Cisd3
Abcc8	Vil1	Piwil2
Nthl1	Wnt10a	Mlycd
Gramd1b	Wnt2b	Acyp1
Rpl10a	Wnt3	Colgalt1
Olfm2	Wnt3a	Ppp1r3b
Sgsm3	Wnt4	Ndufa12
Ppp2r5d	Wnt6	Pigl
Zfp40	Zscan2	Rab44
Tdrkh	Zfp60	Gnmt
Map3k4	Zfpm1	Polh
Mpzl2	Zic1	Lims2
Tnfrsf13c	Abcg1	Mtarc2
Gng13	Chrne	Calb2
E130311K13Rik	Adcy1	Tmem59l
Noxo1	Adra2b	Pex11g
Catsperd	Avil	Nudt12
Gm1070	Alox12b	Lrrc29
Ttll1	Alox5	Polr1has
Wscd1	Ank3	Mark4
Gm38396	Aoc3	Abca2
Gm7072	Apoa1	Katnal2
Ankrd46	Apob	Fgf22
Supt20	Neurog2	Osr2
Slc9b1	Atp1b1	Coro6
Slc38a4	Atrn	Pcgf5
Armh4	Akr1b7	H2-Q2
Fam241b	Bdkrb2	H2-Q6
Fam161b	Serping1	Pax2
Cfap300	C4b	Arhgef4
Brd8dc	S100g	Dlec1
Vpreb3	Casp14	Piwil4
Elfn2	Casp6	Dab1
Septin3	Ccng1	Ermap
Gnaz	Entpd2	Tor2a
Zfp14	Cd7	Klc2
Relt	Cdk5r1	Trim62
Usp17lb	Cdx1	3110040N11Rik
Usp11	Cel	Exoc3l2
Hap1	Celsr1	Tle7
Coprs	Cldn3	Shoc1
Cmklr1	Cldn4	Iqcn
Slc2a4	Ccr4	Gm38999
Fbxo48	Col10a1	Dcst2
Stx1a	Col15a1	Gm36210
Svop	Col4a1	BC034090
Mlxipl	Col4a2	Gm5737
Zfp449	Colq	Gm28729
Pip4k2c	Cpt1b	Ccdc188
Afg1l	Dpysl2	Rnf212b
Nupr1l	Ptgdr2	Hmcn2
Rtkn2	Cyp46a1	Gm36718
Tpd52l1	Cd55	Efcab8
Klhdc8b	Dapk2	Gm13420
Fam229b	Slc6a3	Ankrd31
Tmem108	Des	Sptbn5
Tmem19	Dlx1	Vinac1
Mtus2	Dlx3	Emid1
Pbld1	Edar	Trpv3
Mcam	S1pr4	Ly6g6d
8030474K03Rik	Edn1	Abca4
Lrp11	Efna3	Acads
Stac3	Efnb1	Acvr1b
Adgrb1	Efs	Adra2c
Hscb	Emx1	Adrb1
Hps4	Ephb3	Adrb2
Lcorl	Erbb3	Adssl1
Zc3h13	Faah	Akp3
Elapor2	Fabp3	Alppl2
Slc7a4	Fah	Amh
Sh3tc1	Ccn2	Aqp7
Samd8	Gpd1	Arg1
Hnrnpa3	Gli1	Rhob
Spag1	Gm2a	Ass1
Klhl8	Gnal	Atf3
Zfp512	Gp1ba	Fxyd2
Ppp2r2c	Grin2c	Atp2a1
Ccdc60	Gstm3	Atp7b
Ccdc158	H2-Eb1	Barx1
Dis3	H2-DMb1	Hrk
Ap5m1	Hoxc13	Bik
Shld2	Hrc	Bmp6
Frmd5	Hsd17b1	Bmp7
Polg	Icam1	Bmp8b
Hmgcr	Id2	Btg2
Xrcc1	Ccn1	Car8
Cpne5	Igfbp5	Car4
Bbs9	Irs4	Car5a
Mbnl2	Irx2	Cbx2
Fbxo16	Itga2b	Cckbr
Pak5	Itpr1	Ccnb2
Rabggta	Itpr2	Cd79a
Rec8	Jag2	Cd9
Slc22a17	Kcnh3	Cdh15
Dzip1	Kcnj5	Cdx2
Morn2	Krt17	Ceacam10
Erg28	Krt18	Chga
Stard10	Lat	Ovgp1
Zfp235	Lats1	Chrm4
Caskin1	Lbx1	Cidea
Zfp799	Lmx1b	Col7a1
Pidd1	Muc13	Col9a2
H2-DMa	Man2b1	Cort
Ocln	Matn1	Cox5a
Cab39l	Matn3	Cox6a1
Tmtc4	Bhlha15	Cox8a
Ipo5	Mog	Cpd
Rcbtb1	Muc3	Cplx1
Rplp2	Myod1	Cryga
Zfp788	Neb	Dhcr7
Slc12a7	Neurod1	Dhh
Rgs14	Nfatc2ip	Mpp3
Chmp2a	Nfe2l3	Dlx4
Elobl	Nhlh1	Reep5
Ccp110	Nkx3-1	Drd4
Rprd1a	Numbl	Eef1a2
Msc	Otx1	Efna2
Sbk1	Pax7	Efnb3
Sil1	Pax9	Egfr
Pla2g2f	Padi3	Cela2a
Zfp184	Padi4	Ell
Kif27	Abcb1b	Epha8
Zfp553	Abcb1a	Epx
Gpa33	Phkg1	Ptprv
Arhgap26	Pitx1	Esx1
Gm18905	Pnliprp2	Ezh1
Gm15246	Ppard	F2rl3
Itgae	Ppef2	F5
Prdm9	St14	Fdxr
Acan	Prtn3	Fgfr4
4933427D14Rik	Ptcra	Flt4
Tdrp	Ptp4a1	G0s2
Slain1	Ptpn18	B4galnt2
Hpcal1	Pygm	Gata1
Dmac2l	Rab19	Gcgr
Tmem63c	Rasgrp1	Gch1
Plcd3	Xpr1	Gcm2
Zfp248	Trim10	Gcnt2
Tmem161b	Rps6ka2	Gdf9
Pdk2	S100a1	Arhgdig
Pold2	Scn1b	Gh
Gstp3	Scnn1a	Gja4
Tigd3	Ccl17	Gjb2
Fam234b	St8sia1	Gnrh1
Gm5165	Slc34a2	Gp5
Slc22a21	Slc4a1	Gpr3
Atad2b	C4a	Grid1
Gm45871	Smpd1	Gsx1
Lamtor2	Sncg	Gstm2
Tert	Sox10	Gstm6
Otop2	Sox8	Guca1a
Ercc8	Star	Guca2a
Sncb	Sycp3	Gucy2e
Klhl3	Sdc4	H2-Bl
Plaat3	Syngr3	H2-Oa
Gm550	Tbx3	Hadh
Pigt	Tbx4	Hand1
Vdac1	Tbx6	Hcn2
Slc22a5	Tie1	Hcn3
Slc34a3	Timp3	Foxj1
Duox2	Ppp1r13b	Mst1
Acot8	Traf5	Hhex
Camkk1	Tnfrsf4	Hmgcs2
Dgke	Lin7b	Hmx3
Uqcr10	Vipr1	Foxa1
Rnf212	Vnn1	Hoxa4
Hmx1	Vwf	Hoxb9
Odad4	Wfs1	Hsd11b2
Rasl10a	Wnt10b	Hsd17b2
Lyrm7	Xirp1	Hsd17b4
Sfi1	Ercc5	Htr5a
Sp6	Mkrn3	Icam5
Pdgfa	Zfp39	Igfbp1
Tbl2	Zfp54	Il17ra
Krtcap3	Zfp9	Acod1
Rnf43	Aloxe3	Itm2a
Hmgb2	Apc2	Kcnd1
Slc35f3	C1ql1	Kcnj4
Clcn1	Insrr	Kcnu1
Wnt7a	Lamc3	Kcnq1
Ppp1r9a	Lynx1	Kcns1
Clpb	Mmp17	Kif5c
Ethe1	Nt5e	Klf3
Piwil2	Prkra	Krt4
Mlycd	Sgcb	L1cam
Acyp1	Vax2	Lag3
Colgalt1	Wif1	Lamb2
Ppp1r3b	Avpr1b	Lamc2
Zfp420	Mapk13	Anpep
Arhgef15	Mok	Lcat
Rab44	Sema4g	Lcn2
Mlc1	Dpysl4	Lhx5
Gnmt	Acot1	Ltb4r1
Igfals	Ddx3y	Ltk
Camkmt	Figla	Man2b2
Polh	Foxl2	Ascl2
Ppargc1b	St6galnac5	Mc1r
Lims2	Atp1b2	Mesp2
Calb2	Adrb3	Mgmt
Glce	Btn1a1	Mmp13
Hmx2	C2	Mmp15
Tmem59l	Clu	Mobp
Pex11g	Cpt1a	Msi1
Nudt12	Flt3l	Mthfd2
Cenpu	Gfpt1	Mtnr1a
Zfp958	Hoxc4	Ppp1r15a
Lrrc29	Kcna6	Klk1b3
Polr1has	Lrpap1	Nid2
Abca2	Msx2	Nkx2-3
Katnal2	Mt1	Nkx2-9
Fgf22	Muc1	Nos1
Osr2	Nodal	Notch1
Coro6	Otog	Notch3
Rbm26	Pkd1	Npdc1
1700019N19Rik	St8sia5	Nrtn
Pcgf5	Sptb	Cdk18
Sh2d4b	Ttr	Pde8a
H2-Q2	Uncx	Padi2
Pax2	Plek2	Phka1
Arhgef38	Phlda3	Pigf
Arhgef4	Insl6	Pip5k1b
Dlec1	Mmel1	Pitpnm1
Piwil4	Barx2	Pitx3
Prdm11	Cldn5	Pla2g2c
Grtp1	Ly75	Phox2a
Dab1	Pstpip2	Pou3f3
Ermap	Sfrp1	Ppic
Pnisr	Zfp53	Ppl
Smim41	Meltf	Ppox
Tor2a	Hey2	Npy4r
Trim62	Snai3	Prph2
3110040N11Rik	Aass	Ptpn14
Ankrd65	Chrna4	Ptpn20
Tle7	Col5a1	Ptx3
Shoc1	Galnt3	Abcd4
Iqcn	Slit1	Rad51b
Gm38999	Ero1a	Rasl2-9
Gm36210	Tmprss2	Rb1
Lsmem2	Sacs	Rbpjl
Gm28729	Dkkl1	Rem1
Ccdc188	Icosl	Rfx2
Gm29776	Hs6st1	Slc50a1
Rnf212b	Fbxl8	Rpl26
Hmcn2	Crym	Rrh
Gm36718	Il27ra	Ryr1
Efcab8	Reck	S100a13
Gm13420	Clasrp	Selenbp1
Ankrd31	Zscan12	Sgca
Zscan30	Comp	Siah2
Sptbn5	Aqp3	St3gal4
Emid1	Gpc3	Slc1a1
Trpv3	Auh	Slc1a6
Ly6g6d	Neu3	Slc1a5
Gm21818	Itgb3	Sox1
Pzp	Chst3	Sox15
Abca4	Usp2	Zfp143
Acads	Irf6	Stim1
Acvr1b	Ppp1r3c	Stra8
Gpr182	Fkbp1b	Syngr2
Adra2c	Rab25	Tal2
Adrb1	Oaz3	Tbr1
Adrb2	Slc40a1	Phlda1
Adssl1	Ptprcap	Tex9
Nr0b1	Olig1	Tgm2
Akp3	Gabre	Thrsp
Alppl2	Hpx	Tlx2
Amh	Tef	Tnnc2
Aplp1	Tuba8	Pglyrp1
Aqp7	Slc5a3	Tnni3
Ass1	Zfp316	Traf4
Atp2a1	Akap8l	Tuba3a
Atp7b	Sfrp5	Tuba3b
Bard1	Syt11	Tubb2a
Barx1	Hs3st3b1	Tubb4a
Opn1sw	Abhd2	Ucp1
Hrk	Nup210	Vav2
Bik	Slc1a4	Vax1
Bmp6	Cpxm2	Vdr
Bmp7	Pgam2	Vhl
Bmp8b	Srcin1	Slc32a1
Car8	Prx	Vil1
Car4	Pdlim4	Wnt10a
Car5a	Cacng4	Wnt2b
Cckbr	Panx1	Wnt3
Ccnb2	Cxcl11	Wnt3a
Ccnf	Fxyd1	Wnt4
Cd3e	Ramp3	Wnt6
Cd79a	Gas6	Xpc
Cd9	Dnah10	Zscan2
Cdk1	Cited4	Zfpm1
Cdh15	Htra1	Abcg1
Cdh6	Cxcl14	Chrnb1
Chek1	Cacna1f	Chrne
Chga	Il17rb	Actl7a
Ovgp1	Espn	Adcy1
Chrm4	Plxnb3	Adm
Cidea	Cbln1	Adra2b
Ckm	Tspan7	Avil
Clcn3	Srpk3	Alox12b
Col9a2	Cib2	Alox5
Cort	Clcnkb	Ank3
Cox5a	B4galt6	Apoa1
Cox6a1	Naa80	Apob
Cox8a	Amotl2	Aqp5
Cplx1	Rhcg	Rnd2
Cpox	Acpp	Neurog2
Cryga	Acss2	Atp1b1
Cyp26a1	Dusp14	Akr1b7
Dcc	Gltp	Glb1
Dhcr7	B4galt5	Serping1
Dhh	Spib	Casp14
Dffb	Dmrtb1	Casp6
Mpp3	Abcb9	Ccng1
Dlx4	Tlx3	Cct6b
Drd4	Gpr132	Entpd2
[truncated: 2,045 more rows]

## Sheet: Extended Data Fig.6b
Extended Data Fig.6b：Split violin plots representing the log10 (PRKM+0.1) for transcripts of genes in LA/LB1 LADs and non-LADs in RNA-seq datasets of control, Lmna-/- mESCs or Lmna-/- mESCs after shRNA mediated silencing with control shRNA or shRNA against Cth or Cbs. RPKM, Reads Per Kilobase per Million mapped reads.
Group	Gene symbol	RPKM value	RPKM value + 0.1	LaminB1_LADs	Lamin A_LADs	LA/LB1 LADs
RPKM_pLKO_control	Zfp85	0.195844	0.295844	NO	NO	NO
RPKM_pLKO_control	Fbxo41	0.0520107	0.152011	NO	NO	NO
RPKM_pLKO_control	Taf9b	0.815122	0.915122	NO	NO	NO
RPKM_pLKO_control	Primpol	2.16774	2.26774	NO	NO	NO
RPKM_pLKO_control	Zfp456	0.268952	0.368952	NO	NO	NO
RPKM_pLKO_control	Thnsl1	1.35467	1.45467	NO	NO	NO
RPKM_pLKO_control	Slc35d2	1.2229	1.3229	NO	NO	NO
RPKM_pLKO_control	Plekha8	1.80376	1.90376	NO	NO	NO
RPKM_pLKO_control	Usp17ld	0.0556875	0.155688	Yes	Yes	Yes
RPKM_pLKO_control	Prss48	0.0255805	0.12558	NO	NO	NO
RPKM_pLKO_control	Sohlh1	0.0240644	0.124064	NO	NO	NO
RPKM_pLKO_control	Mpzl1	13.27	13.37	NO	NO	NO
RPKM_pLKO_control	Limch1	0.362296	0.462296	NO	NO	NO
RPKM_pLKO_control	Nol4l	1.25721	1.35721	NO	NO	NO
RPKM_pLKO_control	Panx2	0.0384712	0.138471	NO	NO	NO
RPKM_pLKO_control	Hspa2	2.75326	2.85326	NO	NO	NO
RPKM_pLKO_control	Tdrd1	0.286803	0.386803	NO	NO	NO
RPKM_pLKO_control	Pram1	0.253385	0.353385	NO	NO	NO
RPKM_pLKO_control	Zfp457	0.0236422	0.123642	NO	NO	NO
RPKM_pLKO_control	Kcnq2	0.196305	0.296305	NO	NO	NO
RPKM_pLKO_control	Masp2	4.59054	4.69054	NO	NO	NO
RPKM_pLKO_control	Senp7	1.20814	1.30814	Yes	Yes	Yes
RPKM_pLKO_control	Zfp619	0.458141	0.558141	NO	NO	NO
RPKM_pLKO_control	Ckap2	19.4068	19.5068	NO	NO	NO
RPKM_pLKO_control	Slc13a5	0.289337	0.389337	NO	NO	NO
RPKM_pLKO_control	AU018091	16.9404	17.0404	NO	NO	NO
RPKM_pLKO_control	9930012K11Rik	0.926938	1.02694	NO	NO	NO
RPKM_pLKO_control	Scarf1	0.384791	0.484791	NO	NO	NO
RPKM_pLKO_control	Sgpp2	0.0351699	0.13517	NO	NO	NO
RPKM_pLKO_control	Whamm	3.12074	3.22074	NO	NO	NO
RPKM_pLKO_control	Rexo5	1.01291	1.11291	NO	Yes	NO
RPKM_pLKO_control	Zfp560	0.225673	0.325673	Yes	Yes	Yes
RPKM_pLKO_control	Amigo1	0.736491	0.836491	NO	NO	NO
RPKM_pLKO_control	Cntnap2	0.237251	0.337251	Yes	Yes	Yes
RPKM_pLKO_control	Scube3	1.2764	1.3764	NO	NO	NO
RPKM_pLKO_control	Tacc2	5.94359	6.04359	NO	NO	NO
RPKM_pLKO_control	Pla2g4c	0.157754	0.257754	Yes	Yes	Yes
RPKM_pLKO_control	Ypel2	1.21624	1.31624	NO	NO	NO
RPKM_pLKO_control	Sp9	0.0974432	0.197443	NO	NO	NO
RPKM_pLKO_control	Mreg	13.7382	13.8382	NO	NO	NO
RPKM_pLKO_control	Ajm1	0.218538	0.318538	NO	NO	NO
RPKM_pLKO_control	Zcwpw1	3.64177	3.74177	NO	NO	NO
RPKM_pLKO_control	Syne2	0.764151	0.864151	NO	NO	NO
RPKM_pLKO_control	Rsrc2	16.6074	16.7074	NO	NO	NO
RPKM_pLKO_control	Itgb4	1.03608	1.13608	NO	NO	NO
RPKM_pLKO_control	Zfp69	0.855534	0.955534	NO	NO	NO
RPKM_pLKO_control	Mtus1	3.65758	3.75758	NO	NO	NO
RPKM_pLKO_control	Phactr3	0.0587739	0.158774	NO	NO	NO
RPKM_pLKO_control	Adam22	0.521794	0.621794	Yes	Yes	Yes
RPKM_pLKO_control	Zdhhc23	0.570489	0.670489	NO	NO	NO
RPKM_pLKO_control	Rffl	4.0541	4.1541	NO	NO	NO
RPKM_pLKO_control	Slc25a42	0.962293	1.06229	NO	NO	NO
RPKM_pLKO_control	Trpv5	0.00381837	0.103818	NO	Yes	NO
RPKM_pLKO_control	Btbd8	0.317279	0.417279	NO	NO	NO
RPKM_pLKO_control	Tceanc	0.311764	0.411764	NO	NO	NO
RPKM_pLKO_control	Pramel20	0.0143822	0.114382	Yes	Yes	Yes
RPKM_pLKO_control	Dync2i2	7.64092	7.74092	NO	NO	NO
RPKM_pLKO_control	Zfp760	0.591774	0.691774	NO	Yes	NO
RPKM_pLKO_control	Adora1	0.143596	0.243596	NO	NO	NO
RPKM_pLKO_control	Whrn	1.90683	2.00683	NO	NO	NO
RPKM_pLKO_control	Naaladl1	0.551009	0.651009	NO	NO	NO
RPKM_pLKO_control	Unc13d	0.941392	1.04139	NO	NO	NO
RPKM_pLKO_control	Txnip	33.7278	33.8278	NO	NO	NO
RPKM_pLKO_control	Slc38a8	0.0348981	0.134898	NO	NO	NO
RPKM_pLKO_control	Mdc1	16.8857	16.9857	NO	NO	NO
RPKM_pLKO_control	Slc10a5	0	0.1	NO	NO	NO
RPKM_pLKO_control	Ppp1r13l	7.8503	7.9503	NO	NO	NO
RPKM_pLKO_control	Gpr12	0.00423274	0.104233	NO	NO	NO
RPKM_pLKO_control	Hrh2	0.0397898	0.13979	NO	NO	NO
RPKM_pLKO_control	Olfr543	0.0180094	0.118009	NO	NO	NO
RPKM_pLKO_control	Zfp708	0.45189	0.55189	NO	NO	NO
RPKM_pLKO_control	Hs3st6	0.181366	0.281366	NO	NO	NO
RPKM_pLKO_control	Acd	10.7077	10.8077	NO	NO	NO
RPKM_pLKO_control	Adcy5	0.108644	0.208644	NO	NO	NO
RPKM_pLKO_control	Odf3b	0.195929	0.295929	NO	NO	NO
RPKM_pLKO_control	Ctc1	17.6593	17.7593	NO	NO	NO
RPKM_pLKO_control	Npcd	2.81497	2.91497	NO	NO	NO
RPKM_pLKO_control	Sesn1	2.83471	2.93471	NO	NO	NO
RPKM_pLKO_control	Nrp	1.60056	1.70056	NO	NO	NO
RPKM_pLKO_control	Arhgef39	1.76985	1.86985	NO	NO	NO
RPKM_pLKO_control	Zfp930	2.10165	2.20165	NO	NO	NO
RPKM_pLKO_control	Grm4	0.0611921	0.161192	NO	NO	NO
RPKM_pLKO_control	Rasl10b	0.433285	0.533285	NO	NO	NO
RPKM_pLKO_control	Scn4b	0.0511553	0.151155	NO	NO	NO
RPKM_pLKO_control	Tcaim	1.22131	1.32131	NO	NO	NO
RPKM_pLKO_control	Inip	4.87582	4.97582	NO	NO	NO
RPKM_pLKO_control	Ddn	0.0107126	0.110713	NO	NO	NO
RPKM_pLKO_control	Zfp57	53.4055	53.5055	NO	NO	NO
RPKM_pLKO_control	Tmem151b	0.825955	0.925955	NO	NO	NO
RPKM_pLKO_control	Lingo3	0.493131	0.593131	NO	NO	NO
RPKM_pLKO_control	Zscan4c	0.112645	0.212645	Yes	NO	NO
RPKM_pLKO_control	Capn11	0.142319	0.242319	NO	NO	NO
RPKM_pLKO_control	Aim2	5.9826	6.0826	Yes	NO	NO
RPKM_pLKO_control	Ccdc92b	1.49086	1.59086	NO	NO	NO
RPKM_pLKO_control	Eif1ad7	0.049537	0.149537	Yes	Yes	Yes
RPKM_pLKO_control	Adgrf3	0.0494679	0.149468	NO	NO	NO
RPKM_pLKO_control	Zmynd12	0.0271526	0.127153	NO	NO	NO
RPKM_pLKO_control	Espl1	13.4135	13.5135	NO	NO	NO
RPKM_pLKO_control	Zfyve28	0.667765	0.767765	NO	NO	NO
RPKM_pLKO_control	Rap1gap2	1.66369	1.76369	NO	NO	NO
RPKM_pLKO_control	Arid3c	0.454662	0.554662	NO	NO	NO
RPKM_pLKO_control	Zdhhc18	15.7627	15.8627	NO	NO	NO
RPKM_pLKO_control	Izumo1	0.103363	0.203363	NO	NO	NO
RPKM_pLKO_control	Trim15	0.087912	0.187912	NO	NO	NO
RPKM_pLKO_control	Kbtbd7	1.03522	1.13522	NO	NO	NO
RPKM_pLKO_control	Adamts15	0.125519	0.225519	NO	NO	NO
RPKM_pLKO_control	Pla2g4f	0.176381	0.276381	NO	NO	NO
RPKM_pLKO_control	Bcat1	16.0264	16.1264	NO	NO	NO
RPKM_pLKO_control	Pdp2	1.65456	1.75456	NO	NO	NO
RPKM_pLKO_control	Rabl6	15.8157	15.9157	NO	NO	NO
RPKM_pLKO_control	Carmil3	0.177863	0.277863	NO	NO	NO
RPKM_pLKO_control	C1ql4	0.382559	0.482559	NO	NO	NO
RPKM_pLKO_control	Mctp2	0.758683	0.858683	Yes	Yes	Yes
RPKM_pLKO_control	Apol7b	0	0.1	NO	NO	NO
RPKM_pLKO_control	Rhox10	0.132146	0.232146	NO	NO	NO
RPKM_pLKO_control	Timm9	5.8657	5.9657	NO	NO	NO
RPKM_pLKO_control	Septin10	2.85077	2.95077	NO	NO	NO
RPKM_pLKO_control	Trp53i13	2.97697	3.07697	NO	NO	NO
RPKM_pLKO_control	Pitpnm3	0.0655508	0.165551	NO	NO	NO
RPKM_pLKO_control	Rbfox3	0.166405	0.266405	NO	NO	NO
RPKM_pLKO_control	Zfp563	0.178621	0.278621	NO	NO	NO
RPKM_pLKO_control	Pbx4	1.13933	1.23933	NO	NO	NO
RPKM_pLKO_control	Arl14ep	3.85718	3.95718	NO	NO	NO
RPKM_pLKO_control	Cxadr	2.55928	2.65928	NO	NO	NO
RPKM_pLKO_control	Trp53i11	6.74262	6.84262	NO	NO	NO
RPKM_pLKO_control	Tas2r137	0	0.1	Yes	Yes	Yes
RPKM_pLKO_control	Dmbx1	0.0941357	0.194136	NO	NO	NO
RPKM_pLKO_control	Kcnj6	0	0.1	NO	NO	NO
RPKM_pLKO_control	Npnt	1.50836	1.60836	NO	Yes	NO
RPKM_pLKO_control	Pknox2	0.419298	0.519298	NO	NO	NO
RPKM_pLKO_control	Unc13a	0.538458	0.638458	NO	NO	NO
RPKM_pLKO_control	Nova2	0.524237	0.624237	NO	NO	NO
RPKM_pLKO_control	Lonrf2	0.0574857	0.157486	NO	NO	NO
RPKM_pLKO_control	Sec14l3	0.00251989	0.10252	NO	NO	NO
RPKM_pLKO_control	Kcp	0.447258	0.547258	NO	NO	NO
RPKM_pLKO_control	Fat2	0.0240042	0.124004	NO	NO	NO
RPKM_pLKO_control	Dkc1	28.2035	28.3035	NO	NO	NO
RPKM_pLKO_control	Pecam1	3.5253	3.6253	NO	NO	NO
RPKM_pLKO_control	Klhdc9	1.00893	1.10893	NO	NO	NO
RPKM_pLKO_control	Lrrc14b	0.524924	0.624924	NO	NO	NO
RPKM_pLKO_control	Rnf17	3.53509	3.63509	NO	NO	NO
RPKM_pLKO_control	Ntrk1	0.0905232	0.190523	NO	NO	NO
RPKM_pLKO_control	Bbs1	0.529274	0.629274	NO	NO	NO
RPKM_pLKO_control	Commd6	7.52417	7.62417	NO	NO	NO
RPKM_pLKO_control	Ecscr	2.66145	2.76145	NO	NO	NO
RPKM_pLKO_control	1700029J07Rik	0.0964058	0.196406	NO	NO	NO
RPKM_pLKO_control	Tradd	3.39618	3.49618	NO	NO	NO
RPKM_pLKO_control	Shcbp1l	0.206207	0.306207	NO	NO	NO
RPKM_pLKO_control	Ephx3	0.0795199	0.17952	NO	NO	NO
RPKM_pLKO_control	2510002D24Rik	2.17359	2.27359	NO	NO	NO
RPKM_pLKO_control	1700066B19Rik	0.0285294	0.128529	NO	NO	NO
RPKM_pLKO_control	Cln6	7.99531	8.09531	NO	NO	NO
RPKM_pLKO_control	Tmem181a	1.09664	1.19664	NO	NO	NO
RPKM_pLKO_control	Skap1	0.0789262	0.178926	NO	NO	NO
RPKM_pLKO_control	C77080	16.4217	16.5217	NO	NO	NO
RPKM_pLKO_control	Naa11	1.56938	1.66938	Yes	NO	NO
RPKM_pLKO_control	AU015228	0.109203	0.209203	NO	NO	NO
RPKM_pLKO_control	Myzap	0.48142	0.58142	NO	NO	NO
RPKM_pLKO_control	Pls1	1.25175	1.35175	NO	NO	NO
RPKM_pLKO_control	Ezhip	0.270997	0.370997	Yes	Yes	Yes
RPKM_pLKO_control	Rprml	0.0656517	0.165652	NO	NO	NO
RPKM_pLKO_control	Ttc7b	7.06344	7.16344	NO	NO	NO
RPKM_pLKO_control	Slc45a4	3.66138	3.76138	NO	NO	NO
RPKM_pLKO_control	Calr4	0.347296	0.447296	NO	NO	NO
RPKM_pLKO_control	Slc5a10	0.234506	0.334506	NO	NO	NO
RPKM_pLKO_control	Trim40	0.00927207	0.109272	NO	NO	NO
RPKM_pLKO_control	Fancd2	5.80657	5.90657	NO	NO	NO
RPKM_pLKO_control	Cfap44	0.0294993	0.129499	NO	NO	NO
RPKM_pLKO_control	Zfp583	0.712803	0.812803	NO	NO	NO
RPKM_pLKO_control	Plekhg1	1.41393	1.51393	NO	NO	NO
RPKM_pLKO_control	Pak6	0.413827	0.513827	NO	NO	NO
RPKM_pLKO_control	Spata5l1	1.98567	2.08567	NO	NO	NO
RPKM_pLKO_control	Mcu	4.4167	4.5167	NO	NO	NO
RPKM_pLKO_control	Stox1	0.0732178	0.173218	NO	NO	NO
RPKM_pLKO_control	Agap2	0.153934	0.253934	NO	NO	NO
RPKM_pLKO_control	Gls2	4.04244	4.14244	NO	NO	NO
RPKM_pLKO_control	Gm525	0.0171528	0.117153	NO	NO	NO
RPKM_pLKO_control	Qrich2	0.100505	0.200505	NO	NO	NO
RPKM_pLKO_control	Slc4a7	4.62022	4.72022	NO	Yes	NO
RPKM_pLKO_control	Brd1	11.1206	11.2206	NO	NO	NO
RPKM_pLKO_control	Prdm6	0.0586183	0.158618	NO	NO	NO
RPKM_pLKO_control	Cryzl2	1.42254	1.52254	NO	Yes	NO
RPKM_pLKO_control	Slc30a10	0.0466642	0.146664	NO	NO	NO
RPKM_pLKO_control	Sbspon	0.169894	0.269894	NO	NO	NO
RPKM_pLKO_control	Smim26	3.1157	3.2157	NO	NO	NO
RPKM_pLKO_control	Fhdc1	0.712157	0.812157	NO	NO	NO
RPKM_pLKO_control	Ampd1	0.134263	0.234263	NO	NO	NO
RPKM_pLKO_control	Ndufb6	19.2748	19.3748	NO	NO	NO
RPKM_pLKO_control	Cox18	11.9274	12.0274	NO	NO	NO
RPKM_pLKO_control	Vsig10	2.04976	2.14976	NO	NO	NO
RPKM_pLKO_control	Ccdc61	4.72047	4.82047	NO	NO	NO
RPKM_pLKO_control	Tmem231	6.18966	6.28966	NO	NO	NO
RPKM_pLKO_control	Myrfl	0.0358843	0.135884	NO	NO	NO
RPKM_pLKO_control	Syndig1l	0.0120976	0.112098	NO	NO	NO
RPKM_pLKO_control	Abcc4	12.3039	12.4039	NO	NO	NO
RPKM_pLKO_control	Ttc38	1.00451	1.10451	NO	NO	NO
RPKM_pLKO_control	Cdc42bpg	7.67443	7.77443	NO	NO	NO
RPKM_pLKO_control	Sec31b	0.228988	0.328988	NO	NO	NO
RPKM_pLKO_control	D430041D05Rik	0.0231405	0.12314	NO	NO	NO
RPKM_pLKO_control	Iqsec3	0.00449997	0.1045	NO	NO	NO
RPKM_pLKO_control	Zfp568	13.3081	13.4081	NO	NO	NO
RPKM_pLKO_control	Ntn5	0.171883	0.271883	NO	NO	NO
RPKM_pLKO_control	Pgr15l	0.020727	0.120727	Yes	Yes	Yes
RPKM_pLKO_control	Cdhr2	0.0124669	0.112467	NO	NO	NO
RPKM_pLKO_control	Treml2	0.254151	0.354151	NO	NO	NO
RPKM_pLKO_control	Rbm44	0.286239	0.386239	NO	NO	NO
RPKM_pLKO_control	Lgr6	0.591332	0.691332	NO	NO	NO
RPKM_pLKO_control	Rnf224	0.0198425	0.119842	NO	NO	NO
RPKM_pLKO_control	Ceacam16	0.710013	0.810013	NO	NO	NO
RPKM_pLKO_control	Tmem211	0.0442941	0.144294	NO	NO	NO
RPKM_pLKO_control	Trim75	0.0201824	0.120182	NO	NO	NO
RPKM_pLKO_control	Nlrp12	0.0306261	0.130626	NO	NO	NO
RPKM_pLKO_control	Cdkl4	0.094749	0.194749	NO	NO	NO
RPKM_pLKO_control	Arl14epl	1.16555	1.26555	NO	NO	NO
RPKM_pLKO_control	Accsl	1.66166	1.76166	NO	NO	NO
RPKM_pLKO_control	Spef1l	0.237274	0.337274	NO	NO	NO
RPKM_pLKO_control	Foxr1	0.453698	0.553698	NO	NO	NO
RPKM_pLKO_control	Bclaf3	5.06689	5.16689	NO	NO	NO
RPKM_pLKO_control	Iqgap3	5.00347	5.10347	NO	NO	NO
RPKM_pLKO_control	BC048644	0.0136216	0.113622	NO	NO	NO
RPKM_pLKO_control	Mfsd2b	0.149601	0.249601	NO	NO	NO
RPKM_pLKO_control	Mageb4	0.00411638	0.104116	Yes	Yes	Yes
RPKM_pLKO_control	Gramd2	0.476859	0.576859	NO	NO	NO
RPKM_pLKO_control	Klhl32	0.0480373	0.148037	Yes	Yes	Yes
RPKM_pLKO_control	Tnfaip8l3	0.10078	0.20078	NO	NO	NO
RPKM_pLKO_control	Pgap3	1.42869	1.52869	NO	NO	NO
RPKM_pLKO_control	Bex6	0.0106684	0.110668	NO	NO	NO
RPKM_pLKO_control	Slc47a2	0.0604948	0.160495	NO	NO	NO
RPKM_pLKO_control	Dnaaf3	2.79647	2.89647	NO	NO	NO
RPKM_pLKO_control	Acsl6	0.515092	0.615092	NO	NO	NO
RPKM_pLKO_control	Crxos	0.120051	0.220051	NO	NO	NO
RPKM_pLKO_control	Dnah1	0.133961	0.233961	NO	NO	NO
RPKM_pLKO_control	Trim80	0.0265488	0.126549	NO	NO	NO
RPKM_pLKO_control	Pramel17	0.0153171	0.115317	Yes	Yes	Yes
RPKM_pLKO_control	Ubtfl1	0.0310391	0.131039	Yes	Yes	Yes
RPKM_pLKO_control	Zfp551	0.344844	0.444844	Yes	Yes	Yes
RPKM_pLKO_control	Ak8	0.3185	0.4185	NO	NO	NO
RPKM_pLKO_control	Adamts17	0.0469467	0.146947	NO	NO	NO
RPKM_pLKO_control	Thnsl2	0.697504	0.797504	NO	NO	NO
RPKM_pLKO_control	Calca	0.951883	1.05188	Yes	Yes	Yes
RPKM_pLKO_control	Cibar2	0	0.1	NO	NO	NO
RPKM_pLKO_control	7420426K07Rik	0	0.1	NO	NO	NO
RPKM_pLKO_control	Ncoa4	0.391284	0.491284	NO	NO	NO
RPKM_pLKO_control	Limk2	12.9133	13.0133	NO	NO	NO
RPKM_pLKO_control	Pramel31	0.121558	0.221558	NO	NO	NO
RPKM_pLKO_control	Armc2	0.0332777	0.133278	NO	NO	NO
RPKM_pLKO_control	Erich1	4.55706	4.65706	NO	NO	NO
RPKM_pLKO_control	Tlcd5	0.313758	0.413758	NO	NO	NO
RPKM_pLKO_control	Mrgprx2	0	0.1	Yes	Yes	Yes
RPKM_pLKO_control	Bpifb4	0.202711	0.302711	NO	NO	NO
RPKM_pLKO_control	Ccdc24	1.09455	1.19455	NO	NO	NO
RPKM_pLKO_control	Dnai2	0.233046	0.333046	NO	NO	NO
RPKM_pLKO_control	Kbtbd6	0.434459	0.534459	NO	NO	NO
RPKM_pLKO_control	Pnpla1	0.00441192	0.104412	NO	NO	NO
RPKM_pLKO_control	Zfr2	0.332479	0.432479	NO	NO	NO
RPKM_pLKO_control	Tmem92	0.132757	0.232757	NO	NO	NO
RPKM_pLKO_control	Ms4a15	0.0837129	0.183713	NO	NO	NO
RPKM_pLKO_control	Mansc4	0.0902611	0.190261	NO	NO	NO
RPKM_pLKO_control	Defb42	0.0647806	0.164781	NO	NO	NO
RPKM_pLKO_control	Golm1	15.7771	15.8771	NO	NO	NO
RPKM_pLKO_control	Setd6	7.37953	7.47953	NO	NO	NO
RPKM_pLKO_control	Atp2b2	0.0180862	0.118086	NO	NO	NO
RPKM_pLKO_control	Nfatc2	0.815195	0.915195	NO	NO	NO
RPKM_pLKO_control	Slc41a3	1.83857	1.93857	NO	NO	NO
RPKM_pLKO_control	Prok2	0.124834	0.224834	NO	NO	NO
RPKM_pLKO_control	Cgn	2.42348	2.52348	NO	NO	NO
RPKM_pLKO_control	Arhgef10	1.73571	1.83571	NO	NO	NO
RPKM_pLKO_control	Strip2	0.0619321	0.161932	NO	NO	NO
RPKM_pLKO_control	Timm8a2	0.155329	0.255329	NO	NO	NO
RPKM_pLKO_control	Zfp791	0.269299	0.369299	NO	NO	NO
RPKM_pLKO_control	Slc22a14	0.00450976	0.10451	NO	NO	NO
RPKM_pLKO_control	Zdhhc12	20.1393	20.2393	NO	NO	NO
RPKM_pLKO_control	Cd6	0.191777	0.291777	NO	NO	NO
RPKM_pLKO_control	BC147527	0.0312713	0.131271	NO	NO	NO
RPKM_pLKO_control	Wdr93	0.179975	0.279975	NO	NO	NO
RPKM_pLKO_control	Gm11992	0.0943311	0.194331	NO	NO	NO
RPKM_pLKO_control	Deptor	1.73086	1.83086	NO	NO	NO
RPKM_pLKO_control	Dusp22	1.05998	1.15998	NO	NO	NO
RPKM_pLKO_control	Banf1	127.799	127.899	NO	NO	NO
RPKM_pLKO_control	Arsi	0.0989664	0.198966	NO	NO	NO
RPKM_pLKO_control	Cldn19	0.0235459	0.123546	NO	NO	NO
RPKM_pLKO_control	Marveld2	0.760986	0.860986	NO	NO	NO
RPKM_pLKO_control	Mapt	0.446966	0.546966	NO	NO	NO
RPKM_pLKO_control	Olfm1	1.09259	1.19259	NO	NO	NO
RPKM_pLKO_control	Ric3	0.613022	0.713022	Yes	Yes	Yes
RPKM_pLKO_control	Gng2	8.65929	8.75929	NO	NO	NO
RPKM_pLKO_control	Gng7	1.15016	1.25016	NO	NO	NO
RPKM_pLKO_control	Faim2	0.129346	0.229346	NO	NO	NO
RPKM_pLKO_control	Tmod2	0.391659	0.491659	NO	NO	NO
RPKM_pLKO_control	P2rx7	0.999065	1.09907	NO	NO	NO
RPKM_pLKO_control	Atp8a1	0.898248	0.998248	NO	NO	NO
RPKM_pLKO_control	Kif5a	1.03406	1.13406	NO	NO	NO
RPKM_pLKO_control	Klk13	0.198572	0.298572	NO	NO	NO
RPKM_pLKO_control	Trim63	0.660315	0.760315	NO	NO	NO
RPKM_pLKO_control	Cox8c	0.0417917	0.141792	NO	Yes	NO
RPKM_pLKO_control	Ldb3	0.301287	0.401287	NO	NO	NO
RPKM_pLKO_control	Prkcz	0.815461	0.915461	NO	NO	NO
RPKM_pLKO_control	Trpm1	0.110745	0.210745	NO	NO	NO
RPKM_pLKO_control	Ddhd1	2.205	2.305	NO	NO	NO
RPKM_pLKO_control	Asb1	1.24861	1.34861	NO	NO	NO
RPKM_pLKO_control	Aifm2	2.51122	2.61122	NO	NO	NO
RPKM_pLKO_control	Zfhx2	4.63605	4.73605	NO	NO	NO
RPKM_pLKO_control	Kcnd3	0.0198417	0.119842	NO	NO	NO
RPKM_pLKO_control	Mtcp1	0.373665	0.473665	NO	NO	NO
RPKM_pLKO_control	Kif21b	2.00878	2.10878	NO	NO	NO
RPKM_pLKO_control	Kcnj10	0.259758	0.359758	NO	NO	NO
RPKM_pLKO_control	Catsperz	0.378389	0.478389	NO	NO	NO
RPKM_pLKO_control	Wfdc10	0.177177	0.277177	NO	NO	NO
RPKM_pLKO_control	Pnkd	7.12888	7.22888	NO	NO	NO
RPKM_pLKO_control	Gtf2a2	10.1377	10.2377	NO	NO	NO
RPKM_pLKO_control	Pstk	6.17712	6.27712	NO	NO	NO
RPKM_pLKO_control	Mlf1	1.73222	1.83222	Yes	Yes	Yes
RPKM_pLKO_control	Myo6	1.21099	1.31099	Yes	Yes	Yes
RPKM_pLKO_control	Rad54b	3.6306	3.7306	NO	NO	NO
RPKM_pLKO_control	Mroh8	0.228779	0.328779	NO	NO	NO
RPKM_pLKO_control	Glyctk	0.424111	0.524111	NO	NO	NO
RPKM_pLKO_control	Gm20767	0.0436227	0.143623	NO	NO	NO
RPKM_pLKO_control	Lhx3	0.00470199	0.104702	NO	NO	NO
RPKM_pLKO_control	Tesmin	0.553793	0.653793	NO	NO	NO
RPKM_pLKO_control	Mks1	2.59846	2.69846	NO	NO	NO
RPKM_pLKO_control	Arhgap12	4.64575	4.74575	NO	NO	NO
RPKM_pLKO_control	Sco1	2.14437	2.24437	NO	NO	NO
RPKM_pLKO_control	Tmem141	3.32385	3.42385	NO	NO	NO
RPKM_pLKO_control	Larp1b	2.18698	2.28698	NO	NO	NO
RPKM_pLKO_control	Tet2	5.34371	5.44371	NO	NO	NO
RPKM_pLKO_control	Flot2	23.0163	23.1163	NO	NO	NO
RPKM_pLKO_control	Clmn	0.620316	0.720316	NO	NO	NO
RPKM_pLKO_control	Zfp692	5.86853	5.96853	NO	NO	NO
RPKM_pLKO_control	Rspo4	0.0649963	0.164996	NO	NO	NO
RPKM_pLKO_control	Uevld	0.538092	0.638092	NO	NO	NO
RPKM_pLKO_control	Mtmr7	6.03986	6.13986	NO	NO	NO
RPKM_pLKO_control	BC051019	0.150548	0.250548	NO	NO	NO
RPKM_pLKO_control	Kntc1	5.66498	5.76498	NO	NO	NO
RPKM_pLKO_control	Cacna1b	0.371279	0.471279	NO	NO	NO
RPKM_pLKO_control	Akap1	16.2527	16.3527	NO	NO	NO
RPKM_pLKO_control	Apaf1	5.52292	5.62292	NO	Yes	NO
RPKM_pLKO_control	Arrdc4	7.06107	7.16107	Yes	Yes	Yes
RPKM_pLKO_control	Cd74	2.49808	2.59808	NO	NO	NO
RPKM_pLKO_control	Sstr2	0.242865	0.342865	NO	NO	NO
RPKM_pLKO_control	Htra3	0.0643205	0.16432	NO	NO	NO
RPKM_pLKO_control	Nusap1	11.7327	11.8327	NO	NO	NO
RPKM_pLKO_control	Smad7	10.5936	10.6936	NO	NO	NO
RPKM_pLKO_control	Ankdd1b	0.26455	0.36455	NO	NO	NO
RPKM_pLKO_control	Drc7	0.164792	0.264792	NO	NO	NO
RPKM_pLKO_control	Pcdh8	0.111703	0.211703	NO	NO	NO
RPKM_pLKO_control	Slc22a18	1.43225	1.53225	NO	NO	NO
RPKM_pLKO_control	Sema3b	0.370767	0.470767	NO	NO	NO
RPKM_pLKO_control	Zfp2	1.00704	1.10704	NO	NO	NO
RPKM_pLKO_control	Gcdh	6.4044	6.5044	NO	NO	NO
RPKM_pLKO_control	Rbak	1.23496	1.33496	NO	NO	NO
RPKM_pLKO_control	Mapk1ip1	6.30883	6.40883	NO	NO	NO
RPKM_pLKO_control	Mef2b	0.857608	0.957608	NO	NO	NO
RPKM_pLKO_control	Mfge8	45.7675	45.8675	NO	NO	NO
RPKM_pLKO_control	Proca1	0.51682	0.61682	NO	NO	NO
RPKM_pLKO_control	Fam83b	0.263714	0.363714	Yes	Yes	Yes
RPKM_pLKO_control	Prss38	0.0249434	0.124943	NO	NO	NO
RPKM_pLKO_control	Hsf5	0.0971269	0.197127	NO	NO	NO
RPKM_pLKO_control	Ccnjl	1.09732	1.19732	NO	NO	NO
RPKM_pLKO_control	Tulp2	0.507673	0.607673	NO	NO	NO
RPKM_pLKO_control	Zfp952	0.974346	1.07435	NO	NO	NO
RPKM_pLKO_control	Snrpa	31.536	31.636	NO	NO	NO
RPKM_pLKO_control	Agbl5	6.01867	6.11867	NO	NO	NO
RPKM_pLKO_control	Lyrm9	0.492383	0.592383	NO	NO	NO
RPKM_pLKO_control	Plin5	0.27382	0.37382	NO	NO	NO
RPKM_pLKO_control	Scn8a	0.186201	0.286201	NO	NO	NO
RPKM_pLKO_control	Tsks	0.088637	0.188637	NO	NO	NO
RPKM_pLKO_control	Ccdc173	0.343869	0.443869	NO	NO	NO
RPKM_pLKO_control	Lrba	1.67207	1.77207	Yes	Yes	Yes
RPKM_pLKO_control	Sdhaf3	2.56809	2.66809	Yes	Yes	Yes
RPKM_pLKO_control	Hnrnph3	7.48713	7.58713	NO	NO	NO
RPKM_pLKO_control	Brdt	0.0969477	0.196948	NO	NO	NO
RPKM_pLKO_control	Trim72	0.185222	0.285222	NO	NO	NO
RPKM_pLKO_control	Vamp1	0.415044	0.515044	NO	NO	NO
RPKM_pLKO_control	Ret	0.209694	0.309694	NO	NO	NO
RPKM_pLKO_control	Rapgefl1	0.436284	0.536284	NO	NO	NO
RPKM_pLKO_control	Lrp8	1.35605	1.45605	NO	NO	NO
RPKM_pLKO_control	Tubb1	0.0304753	0.130475	NO	NO	NO
RPKM_pLKO_control	Tead4	3.51064	3.61064	NO	NO	NO
RPKM_pLKO_control	Ddias	7.69109	7.79109	NO	Yes	NO
RPKM_pLKO_control	Brca2	2.93702	3.03702	NO	NO	NO
RPKM_pLKO_control	Cacna1s	0.037124	0.137124	NO	NO	NO
RPKM_pLKO_control	Cfap91	0.206957	0.306957	NO	NO	NO
RPKM_pLKO_control	Tmem243	5.00722	5.10722	NO	NO	NO
RPKM_pLKO_control	Pde11a	0.0269695	0.12697	Yes	Yes	Yes
RPKM_pLKO_control	Dock9	3.03376	3.13376	NO	NO	NO
RPKM_pLKO_control	Cnksr1	1.05633	1.15633	NO	NO	NO
RPKM_pLKO_control	Slc25a18	0.416884	0.516884	NO	NO	NO
RPKM_pLKO_control	Nhs	0.496889	0.596889	Yes	Yes	Yes
RPKM_pLKO_control	Tecpr2	1.47116	1.57116	NO	NO	NO
RPKM_pLKO_control	Slc9a3	0	0.1	NO	NO	NO
RPKM_pLKO_control	Zfp707	1.45792	1.55792	NO	NO	NO
RPKM_pLKO_control	Dennd3	0.508208	0.608208	NO	NO	NO
RPKM_pLKO_control	Rgs11	0.622628	0.722628	NO	NO	NO
RPKM_pLKO_control	Lct	0.0182758	0.118276	NO	NO	NO
RPKM_pLKO_control	Cubn	0.73054	0.83054	Yes	Yes	Yes
RPKM_pLKO_control	Lrp2	1.07953	1.17953	NO	Yes	NO
RPKM_pLKO_control	Gpat2	0.281474	0.381474	NO	NO	NO
RPKM_pLKO_control	Cep152	1.48618	1.58618	NO	NO	NO
RPKM_pLKO_control	Saxo1	0.0282109	0.128211	Yes	Yes	Yes
RPKM_pLKO_control	Grik3	3.79767	3.89767	NO	NO	NO
RPKM_pLKO_control	Morn1	0.383182	0.483182	NO	NO	NO
RPKM_pLKO_control	Cd8a	0.0129981	0.112998	NO	NO	NO
RPKM_pLKO_control	Ankrd26	1.02672	1.12672	NO	NO	NO
RPKM_pLKO_control	Nccrp1	0.943919	1.04392	NO	NO	NO
RPKM_pLKO_control	Jhy	0	0.1	NO	NO	NO
RPKM_pLKO_control	Adamts14	1.48756	1.58756	NO	NO	NO
RPKM_pLKO_control	Ogdhl	12.2422	12.3422	NO	NO	NO
RPKM_pLKO_control	Dhtkd1	1.95034	2.05034	NO	NO	NO
RPKM_pLKO_control	Upf2	5.46985	5.56985	NO	NO	NO
RPKM_pLKO_control	Kcng1	0.208962	0.308962	NO	NO	NO
RPKM_pLKO_control	Prrg3	0.637473	0.737473	NO	NO	NO
RPKM_pLKO_control	Ankrd35	0.360821	0.460821	NO	NO	NO
RPKM_pLKO_control	Kcnq4	0.0632156	0.163216	NO	NO	NO
RPKM_pLKO_control	Lonrf1	2.64159	2.74159	NO	NO	NO
RPKM_pLKO_control	Npat	4.24872	4.34872	NO	NO	NO
RPKM_pLKO_control	Marf1	4.88995	4.98995	NO	NO	NO
RPKM_pLKO_control	Rap1gap	3.46083	3.56083	NO	NO	NO
RPKM_pLKO_control	Mdga1	0.323079	0.423079	NO	NO	NO
RPKM_pLKO_control	Slc4a11	3.63478	3.73478	NO	NO	NO
RPKM_pLKO_control	Sap30l	7.03414	7.13414	NO	NO	NO
RPKM_pLKO_control	Aspg	0.787952	0.887952	NO	NO	NO
RPKM_pLKO_control	Lama5	10.7796	10.8796	NO	NO	NO
RPKM_pLKO_control	Frmpd1	0.171288	0.271288	NO	NO	NO
RPKM_pLKO_control	Heatr5b	4.10891	4.20891	NO	NO	NO
RPKM_pLKO_control	Focad	3.18493	3.28493	Yes	Yes	Yes
RPKM_pLKO_control	Eml5	1.69308	1.79308	NO	Yes	NO
RPKM_pLKO_control	Hcn4	0.0245404	0.12454	NO	NO	NO
RPKM_pLKO_control	Zfp174	0.163807	0.263807	NO	NO	NO
RPKM_pLKO_control	Myo1a	0.103975	0.203975	NO	NO	NO
RPKM_pLKO_control	Gpr179	0.0293693	0.129369	NO	NO	NO
RPKM_pLKO_control	Ercc6	1.99469	2.09469	NO	NO	NO
RPKM_pLKO_control	Stum	0.00318538	0.103185	NO	NO	NO
RPKM_pLKO_control	Pigg	1.31757	1.41757	NO	NO	NO
RPKM_pLKO_control	Palb2	2.38777	2.48777	NO	NO	NO
RPKM_pLKO_control	Tln2	2.60157	2.70157	NO	NO	NO
RPKM_pLKO_control	Fbxo43	0.0409701	0.14097	NO	NO	NO
RPKM_pLKO_control	Fam186b	0.0511087	0.151109	NO	NO	NO
RPKM_pLKO_control	Alg6	1.77409	1.87409	NO	Yes	NO
RPKM_pLKO_control	Dscaml1	0.0864341	0.186434	NO	NO	NO
RPKM_pLKO_control	Doxl1	0	0.1	NO	NO	NO
RPKM_pLKO_control	Tbc1d4	0.280577	0.380577	Yes	Yes	Yes
RPKM_pLKO_control	Fam217b	0.9323	1.0323	NO	NO	NO
RPKM_pLKO_control	Prr19	1.85326	1.95326	NO	NO	NO
RPKM_pLKO_control	Tmem236	0.0689236	0.168924	Yes	Yes	Yes
RPKM_pLKO_control	C2cd4b	0.37879	0.47879	NO	NO	NO
RPKM_pLKO_control	Myo5c	0.759395	0.859395	NO	NO	NO
RPKM_pLKO_control	Zkscan2	0.18696	0.28696	NO	NO	NO
RPKM_pLKO_control	Dnah2	0.0854393	0.185439	NO	NO	NO
RPKM_pLKO_control	Slc9a5	2.01137	2.11137	NO	NO	NO
RPKM_pLKO_control	Plekhg4	0.371473	0.471473	NO	NO	NO
RPKM_pLKO_control	Cul9	0.639069	0.739069	NO	NO	NO
RPKM_pLKO_control	Dgkh	1.25163	1.35163	NO	NO	NO
RPKM_pLKO_control	L3mbtl1	0.0724758	0.172476	NO	NO	NO
RPKM_pLKO_control	Adgrd1	0.092608	0.192608	NO	NO	NO
RPKM_pLKO_control	Lrrc7	0.0680605	0.16806	Yes	Yes	Yes
RPKM_pLKO_control	Cystm1	5.69577	5.79577	NO	NO	NO
RPKM_pLKO_control	Chd5	0.534388	0.634388	NO	NO	NO
RPKM_pLKO_control	Ctcfl	0.114382	0.214382	NO	NO	NO
RPKM_pLKO_control	Tbc1d31	4.23448	4.33448	NO	NO	NO
RPKM_pLKO_control	Prss33	0.0949094	0.194909	NO	NO	NO
RPKM_pLKO_control	Lrr1	3.80641	3.90641	NO	NO	NO
RPKM_pLKO_control	Plb1	0.0635326	0.163533	NO	NO	NO
RPKM_pLKO_control	Agmat	0.0881155	0.188115	NO	NO	NO
RPKM_pLKO_control	Unc13b	1.41319	1.51319	NO	NO	NO
RPKM_pLKO_control	Fndc1	0.133249	0.233249	NO	NO	NO
RPKM_pLKO_control	Galnt16	0.219322	0.319322	NO	NO	NO
RPKM_pLKO_control	Chrna10	0.0203619	0.120362	NO	NO	NO
RPKM_pLKO_control	Rbm24	0.122724	0.222724	NO	NO	NO
RPKM_pLKO_control	Fam184a	0.361807	0.461807	Yes	Yes	Yes
RPKM_pLKO_control	Ccdc15	0.204328	0.304328	NO	NO	NO
RPKM_pLKO_control	Fbxo47	0.151589	0.251589	NO	NO	NO
RPKM_pLKO_control	Ino80d	1.85965	1.95965	NO	NO	NO
RPKM_pLKO_control	Wdr86	1.48432	1.58432	NO	NO	NO
RPKM_pLKO_control	Plcd4	0.20435	0.30435	NO	NO	NO
RPKM_pLKO_control	Ppp2r5c	20.3387	20.4387	NO	NO	NO
RPKM_pLKO_control	Sh2b1	15.0462	15.1462	NO	NO	NO
RPKM_pLKO_control	Mettl7a3	0.0627449	0.162745	NO	NO	NO
RPKM_pLKO_control	Camta1	0.909875	1.00987	NO	NO	NO
RPKM_pLKO_control	Ccnd3	60.1905	60.2905	NO	NO	NO
RPKM_pLKO_control	Rgs3	0.137128	0.237128	NO	NO	NO
RPKM_pLKO_control	Neurl1b	0.0550745	0.155074	NO	NO	NO
RPKM_pLKO_control	Klhl34	0.0539478	0.153948	NO	NO	NO
RPKM_pLKO_control	Fam43b	0.181265	0.281265	NO	NO	NO
RPKM_pLKO_control	Zfp800	1.14686	1.24686	Yes	Yes	Yes
RPKM_pLKO_control	Tomt	1.14954	1.24954	NO	NO	NO
RPKM_pLKO_control	Zfp72	0.556683	0.656683	NO	NO	NO
RPKM_pLKO_control	Gnb1l	1.47125	1.57125	NO	NO	NO
RPKM_pLKO_control	Tmprss9	0.0233094	0.123309	NO	NO	NO
RPKM_pLKO_control	Dux	0.00515755	0.105158	Yes	NO	NO
RPKM_pLKO_control	Apol8	1.21429	1.31429	NO	NO	NO
RPKM_pLKO_control	Ankrd63	0	0.1	NO	NO	NO
RPKM_pLKO_control	Rnf144a	1.08114	1.18114	NO	NO	NO
RPKM_pLKO_control	Sh3d19	5.65714	5.75714	NO	NO	NO
RPKM_pLKO_control	Efr3b	0.954625	1.05462	NO	NO	NO
RPKM_pLKO_control	Pigyl	10.879	10.979	NO	NO	NO
RPKM_pLKO_control	Spint2	27.4656	27.5656	NO	NO	NO
RPKM_pLKO_control	Sdr39u1	4.47468	4.57468	NO	NO	NO
RPKM_pLKO_control	Ptpru	0.683997	0.783997	NO	NO	NO
RPKM_pLKO_control	Lhx6	0.473506	0.573506	NO	NO	NO
RPKM_pLKO_control	Mboat2	3.21319	3.31319	NO	NO	NO
RPKM_pLKO_control	Disp3	0.0377369	0.137737	NO	NO	NO
RPKM_pLKO_control	Ttll9	0.15301	0.25301	NO	NO	NO
RPKM_pLKO_control	Pars2	1.25459	1.35459	NO	NO	NO
RPKM_pLKO_control	Slc12a8	0.620718	0.720718	NO	NO	NO
RPKM_pLKO_control	Fetub	1.13186	1.23186	NO	NO	NO
RPKM_pLKO_control	Nr3c2	0.0725457	0.172546	Yes	Yes	Yes
RPKM_pLKO_control	Kdf1	2.17515	2.27515	NO	NO	NO
RPKM_pLKO_control	Scn3b	0.684471	0.784471	NO	NO	NO
RPKM_pLKO_control	Rbck1	18.6068	18.7068	NO	NO	NO
RPKM_pLKO_control	Tle3	14.5574	14.6574	NO	NO	NO
RPKM_pLKO_control	Myh7b	0.301949	0.401949	NO	NO	NO
RPKM_pLKO_control	Steap3	6.27955	6.37955	NO	NO	NO
RPKM_pLKO_control	Pramel24	0.0427316	0.142732	Yes	Yes	Yes
RPKM_pLKO_control	Ndufaf6	4.14358	4.24358	NO	NO	NO
RPKM_pLKO_control	Cisd3	10.2339	10.3339	NO	NO	NO
RPKM_pLKO_control	Ppp1r3d	0.0783822	0.178382	NO	NO	NO
RPKM_pLKO_control	Zbtb34	1.14445	1.24445	NO	NO	NO
RPKM_pLKO_control	Tmem8b	0.68274	0.78274	NO	NO	NO
RPKM_pLKO_control	Myom3	0.0348624	0.134862	NO	NO	NO
RPKM_pLKO_control	Fam131c	1.52952	1.62952	NO	NO	NO
RPKM_pLKO_control	Myorg	1.02734	1.12734	NO	NO	NO
RPKM_pLKO_control	Pramel19	0.249831	0.349831	NO	NO	NO
RPKM_pLKO_control	Slc2a7	0.114981	0.214981	NO	NO	NO
RPKM_pLKO_control	Tmem235	0.0217483	0.121748	NO	NO	NO
RPKM_pLKO_control	Tcp11	1.51016	1.61016	NO	NO	NO
RPKM_pLKO_control	Mpzl3	0.624277	0.724277	NO	NO	NO
RPKM_pLKO_control	Dennd2d	0.154905	0.254905	Yes	Yes	Yes
RPKM_pLKO_control	Kif26a	1.04265	1.14265	NO	NO	NO
RPKM_pLKO_control	Zbtb3	0.540328	0.640328	NO	NO	NO
RPKM_pLKO_control	Ndufa4l2	0.540551	0.640551	NO	NO	NO
RPKM_pLKO_control	Tox2	0.0668872	0.166887	NO	NO	NO
RPKM_pLKO_control	Pik3c2b	0.415255	0.515255	NO	NO	NO
RPKM_pLKO_control	Arhgap44	2.58088	2.68088	NO	NO	NO
RPKM_pLKO_control	Duox1	0.108512	0.208512	NO	NO	NO
RPKM_pLKO_control	Ajap1	0.0295777	0.129578	NO	NO	NO
RPKM_pLKO_control	Shisal2a	0.475488	0.575488	NO	NO	NO
RPKM_pLKO_control	Tmem35b	1.73979	1.83979	NO	NO	NO
RPKM_pLKO_control	Zkscan16	0.0386578	0.138658	NO	NO	NO
RPKM_pLKO_control	Sh2d5	0.710966	0.810966	NO	NO	NO
RPKM_pLKO_control	Rnf39	0.660078	0.760078	NO	NO	NO
RPKM_pLKO_control	Myh3	0.119028	0.219028	NO	NO	NO
RPKM_pLKO_control	Pnmal2	0.599187	0.699187	NO	NO	NO
RPKM_pLKO_control	Fbxo39	0.0360472	0.136047	NO	NO	NO
RPKM_pLKO_control	Dnajc28	0.326465	0.426465	NO	NO	NO
RPKM_pLKO_control	Zscan4d	0.225411	0.325411	Yes	NO	NO
RPKM_pLKO_control	Otof	0.00608557	0.106086	NO	NO	NO
RPKM_pLKO_control	Bicral	6.27787	6.37787	NO	NO	NO
RPKM_pLKO_control	Pnma5	1.56162	1.66162	NO	NO	NO
RPKM_pLKO_control	Mkrn2os	0.043958	0.143958	NO	NO	NO
RPKM_pLKO_control	Prrt4	0.268493	0.368493	NO	NO	NO
RPKM_pLKO_control	Akap5	0.0989471	0.198947	NO	NO	NO
RPKM_pLKO_control	Zfp267	1.64228	1.74228	NO	NO	NO
RPKM_pLKO_control	Pabpc4l	0.148908	0.248908	Yes	Yes	Yes
RPKM_pLKO_control	Mrap2	0.0156672	0.115667	NO	Yes	NO
RPKM_pLKO_control	Fam71f2	0.446474	0.546474	NO	NO	NO
RPKM_pLKO_control	Clec2l	0.163139	0.263139	NO	NO	NO
RPKM_pLKO_control	Susd5	0.12582	0.22582	NO	NO	NO
RPKM_pLKO_control	Gpr25	0.0150047	0.115005	NO	NO	NO
RPKM_pLKO_control	Tmem233	0.0123167	0.112317	NO	NO	NO
RPKM_pLKO_control	Isoc2a	5.73418	5.83418	NO	NO	NO
RPKM_pLKO_control	Calml4	4.71342	4.81342	NO	NO	NO
RPKM_pLKO_control	Cnnm2	4.8864	4.9864	NO	NO	NO
RPKM_pLKO_control	Alkbh1	8.0292	8.1292	NO	NO	NO
RPKM_pLKO_control	Col6a6	0.0332678	0.133268	NO	NO	NO
RPKM_pLKO_control	Kif19a	0.125124	0.225124	NO	NO	NO
RPKM_pLKO_control	Zglp1	1.13662	1.23662	NO	NO	NO
RPKM_pLKO_control	Myo15	0.00965723	0.109657	NO	NO	NO
RPKM_pLKO_control	Ablim1	1.20535	1.30535	NO	NO	NO
RPKM_pLKO_control	Vmn2r90	0	0.1	Yes	Yes	Yes
RPKM_pLKO_control	Gm11545	0.28065	0.38065	NO	NO	NO
RPKM_pLKO_control	Zfp185	1.54756	1.64756	NO	NO	NO
RPKM_pLKO_control	Aqp8	0.09041	0.19041	NO	NO	NO
RPKM_pLKO_control	Bach2	0.287214	0.387214	NO	NO	NO
RPKM_pLKO_control	Kazn	5.66222	5.76222	NO	NO	NO
RPKM_pLKO_control	C2cd5	5.85156	5.95156	NO	NO	NO
RPKM_pLKO_control	Cenpw	2.11299	2.21299	Yes	NO	NO
RPKM_pLKO_control	Bcan	0.245633	0.345633	NO	NO	NO
RPKM_pLKO_control	Cbfa2t3	0.0953017	0.195302	NO	NO	NO
RPKM_pLKO_control	Trpc2	0.0425323	0.142532	NO	NO	NO
RPKM_pLKO_control	Rnft2	0.582156	0.682156	NO	NO	NO
RPKM_pLKO_control	Mdfi	4.14885	4.24885	NO	NO	NO
RPKM_pLKO_control	Nos1ap	0.154677	0.254677	NO	NO	NO
RPKM_pLKO_control	Apoc1	8.35826	8.45826	NO	NO	NO
RPKM_pLKO_control	Banp	3.10615	3.20615	NO	NO	NO
RPKM_pLKO_control	Ppih	1.46315	1.56315	NO	NO	NO
RPKM_pLKO_control	Cdca2	8.03761	8.13761	NO	NO	NO
RPKM_pLKO_control	Inpp5d	15.0553	15.1553	NO	NO	NO
RPKM_pLKO_control	Yif1b	25.8988	25.9988	NO	NO	NO
RPKM_pLKO_control	Lnpk	1.13314	1.23314	NO	Yes	NO
RPKM_pLKO_control	Hmbs	10.0109	10.1109	NO	NO	NO
RPKM_pLKO_control	Hpn	1.20837	1.30837	NO	NO	NO
RPKM_pLKO_control	Ttk	10.2849	10.3849	NO	NO	NO
RPKM_pLKO_control	Abhd14a	10.3244	10.4244	NO	NO	NO
RPKM_pLKO_control	Zscan4f	0.174293	0.274293	Yes	NO	NO
RPKM_pLKO_control	Gprc5c	2.19239	2.29239	NO	NO	NO
RPKM_pLKO_control	Tmem87a	7.84377	7.94377	NO	NO	NO
RPKM_pLKO_control	Adam11	0.441383	0.541383	NO	NO	NO
RPKM_pLKO_control	Pclo	0.0419662	0.141966	Yes	Yes	Yes
RPKM_pLKO_control	Dnpep	20.4856	20.5856	NO	NO	NO
RPKM_pLKO_control	Serac1	1.70823	1.80823	NO	NO	NO
RPKM_pLKO_control	Zfp661	0.873329	0.973329	NO	NO	NO
RPKM_pLKO_control	Cdc25b	3.87696	3.97696	NO	NO	NO
RPKM_pLKO_control	Sprtn	3.74973	3.84973	NO	NO	NO
RPKM_pLKO_control	Lrrc73	0.582434	0.682434	NO	NO	NO
RPKM_pLKO_control	Ubap1l	0.25024	0.35024	NO	NO	NO
RPKM_pLKO_control	Wdfy1	4.13912	4.23912	NO	NO	NO
RPKM_pLKO_control	Ngef	0.217191	0.317191	NO	NO	NO
RPKM_pLKO_control	Kcnip3	0.582654	0.682654	NO	NO	NO
RPKM_pLKO_control	Chrm1	0.012653	0.112653	NO	NO	NO
RPKM_pLKO_control	Aldh3a1	0.409106	0.509106	NO	NO	NO
RPKM_pLKO_control	Arhgef16	2.22088	2.32088	NO	NO	NO
RPKM_pLKO_control	Bub1	10.2324	10.3324	NO	NO	NO
RPKM_pLKO_control	Naca	4.49593	4.59593	NO	NO	NO
RPKM_pLKO_control	Nemp1	1.44669	1.54669	NO	NO	NO
RPKM_pLKO_control	Odf2	27.2527	27.3527	NO	NO	NO
RPKM_pLKO_control	Plch2	0.159568	0.259568	NO	NO	NO
RPKM_pLKO_control	Boll	0.171119	0.271119	Yes	Yes	Yes
RPKM_pLKO_control	Ppara	0.0139421	0.113942	NO	NO	NO
RPKM_pLKO_control	Frrs1	7.77137	7.87137	NO	NO	NO
RPKM_pLKO_control	Col2a1	0.514578	0.614578	NO	NO	NO
RPKM_pLKO_control	Isg20	5.48917	5.58917	NO	NO	NO
RPKM_pLKO_control	Ltbp4	14.5673	14.6673	NO	NO	NO
RPKM_pLKO_control	Cutc	1.0919	1.1919	NO	NO	NO
RPKM_pLKO_control	Stat5b	1.82735	1.92735	NO	NO	NO
RPKM_pLKO_control	Mtcl1	6.0113	6.1113	NO	NO	NO
RPKM_pLKO_control	Syt3	0.850739	0.950739	NO	NO	NO
RPKM_pLKO_control	Fam189a2	0.325053	0.425053	NO	NO	NO
RPKM_pLKO_control	Cdhr5	0.0308635	0.130863	NO	NO	NO
RPKM_pLKO_control	Ccpg1	7.5089	7.6089	NO	NO	NO
RPKM_pLKO_control	Nedd4l	3.02005	3.12005	NO	NO	NO
RPKM_pLKO_control	Jmjd7	1.92643	2.02643	NO	NO	NO
RPKM_pLKO_control	Mfsd4a	0.0157655	0.115765	NO	NO	NO
RPKM_pLKO_control	Kmt5c	18.475	18.575	NO	NO	NO
RPKM_pLKO_control	Tssc4	11.6823	11.7823	NO	NO	NO
RPKM_pLKO_control	Zbtb44	5.19279	5.29279	NO	NO	NO
RPKM_pLKO_control	Phlpp2	0.907571	1.00757	NO	NO	NO
RPKM_pLKO_control	Fcgbp	0.0522901	0.15229	NO	NO	NO
RPKM_pLKO_control	Eif1ad3	0.0526457	0.152646	Yes	Yes	Yes
RPKM_pLKO_control	Nectin4	0.501709	0.601709	NO	NO	NO
RPKM_pLKO_control	Bdh1	6.34951	6.44951	NO	NO	NO
RPKM_pLKO_control	Kit	6.69119	6.79119	NO	NO	NO
RPKM_pLKO_control	2310022A10Rik	11.3559	11.4559	NO	NO	NO
RPKM_pLKO_control	Pnpla6	9.47026	9.57026	NO	NO	NO
RPKM_pLKO_control	Klhl26	6.08431	6.18431	NO	NO	NO
RPKM_pLKO_control	Lepr	0.0260013	0.126001	Yes	Yes	Yes
RPKM_pLKO_control	Pla2g5	0.686352	0.786352	NO	NO	NO
RPKM_pLKO_control	Cdc14b	2.55575	2.65575	NO	NO	NO
RPKM_pLKO_control	B3galt5	0	0.1	NO	NO	NO
RPKM_pLKO_control	Eif4a2	24.219	24.319	NO	NO	NO
RPKM_pLKO_control	Fam178b	2.45828	2.55828	NO	NO	NO
RPKM_pLKO_control	Pramel16	0.0340812	0.134081	Yes	Yes	Yes
RPKM_pLKO_control	Pramel21	0	0.1	Yes	Yes	Yes
RPKM_pLKO_control	Trp73	0.530018	0.630018	NO	NO	NO
RPKM_pLKO_control	Mroh7	0.0237557	0.123756	NO	NO	NO
RPKM_pLKO_control	Acrbp	2.97774	3.07774	NO	NO	NO
RPKM_pLKO_control	Sirt3	3.61651	3.71651	NO	NO	NO
RPKM_pLKO_control	Ccn6	0.0217791	0.121779	NO	NO	NO
RPKM_pLKO_control	Meioc	0.70484	0.80484	NO	NO	NO
RPKM_pLKO_control	Sec14l5	0.184783	0.284783	NO	NO	NO
RPKM_pLKO_control	Tspan32	0.0964126	0.196413	NO	NO	NO
RPKM_pLKO_control	Opn4	0.0397581	0.139758	NO	NO	NO
RPKM_pLKO_control	Tm9sf5	0.136208	0.236208	Yes	Yes	Yes
RPKM_pLKO_control	Tnnt2	0.152351	0.252351	NO	NO	NO
RPKM_pLKO_control	Best2	0.10191	0.20191	NO	NO	NO
RPKM_pLKO_control	Lpin1	4.33109	4.43109	NO	NO	NO
RPKM_pLKO_control	Hdac6	13.8686	13.9686	NO	NO	NO
RPKM_pLKO_control	Hpca	0.918697	1.0187	NO	NO	NO
RPKM_pLKO_control	Srrm1	62.7411	62.8411	NO	NO	NO
RPKM_pLKO_control	D630003M21Rik	0.0498122	0.149812	NO	NO	NO
RPKM_pLKO_control	Pttg1	34.418	34.518	NO	NO	NO
RPKM_pLKO_control	Gpr160	0.756411	0.856411	NO	NO	NO
RPKM_pLKO_control	Megf11	0.302402	0.402402	NO	NO	NO
RPKM_pLKO_control	Nxpe3	0.482372	0.582372	NO	NO	NO
RPKM_pLKO_control	Prr23a1	0.0565795	0.156579	NO	NO	NO
RPKM_pLKO_control	Prr23a2	0.0404346	0.140435	NO	NO	NO
RPKM_pLKO_control	Smim17	0.0233053	0.123305	NO	NO	NO
RPKM_pLKO_control	Il34	0.494249	0.594249	NO	NO	NO
RPKM_pLKO_control	Iho1	0.293668	0.393668	NO	NO	NO
RPKM_pLKO_control	Ly6h	0.269515	0.369515	NO	NO	NO
RPKM_pLKO_control	Cntfr	3.57069	3.67069	NO	NO	NO
RPKM_pLKO_control	Cpne6	0.0188049	0.118805	NO	NO	NO
RPKM_pLKO_control	Dpp6	0.0336149	0.133615	NO	NO	NO
RPKM_pLKO_control	Gfra4	0.900713	1.00071	NO	NO	NO
RPKM_pLKO_control	Tph1	0.0143675	0.114368	NO	NO	NO
RPKM_pLKO_control	Poli	5.22251	5.32251	NO	NO	NO
RPKM_pLKO_control	Rtkn	5.742	5.842	NO	NO	NO
RPKM_pLKO_control	Gcnt1	1.42189	1.52189	NO	NO	NO
RPKM_pLKO_control	Fer1l4	0.021473	0.121473	NO	NO	NO
RPKM_pLKO_control	Rbl1	2.37357	2.47357	NO	NO	NO
RPKM_pLKO_control	Ctnnbip1	5.43071	5.53071	NO	NO	NO
RPKM_pLKO_control	Tmem230	2.74739	2.84739	NO	NO	NO
RPKM_pLKO_control	Tpx2	23.6542	23.7542	NO	NO	NO
RPKM_pLKO_control	Alg12	2.79034	2.89034	NO	NO	NO
RPKM_pLKO_control	Zfp937	0.128152	0.228152	NO	Yes	NO
RPKM_pLKO_control	Spdya	0	0.1	NO	NO	NO
RPKM_pLKO_control	Fbrsl1	7.08172	7.18172	NO	NO	NO
RPKM_pLKO_control	Nemp2	0.816157	0.916157	NO	NO	NO
RPKM_pLKO_control	Lrrc9	0.132151	0.232151	NO	NO	NO
RPKM_pLKO_control	Eif4a3l1	0.244692	0.344692	NO	Yes	NO
RPKM_pLKO_control	Atat1	4.07236	4.17236	NO	NO	NO
RPKM_pLKO_control	Slc6a8	30.7722	30.8722	NO	NO	NO
RPKM_pLKO_control	Zfp949	0.847199	0.947199	NO	NO	NO
RPKM_pLKO_control	Tent5c	0.912092	1.01209	NO	NO	NO
RPKM_pLKO_control	Frrs1l	0.147578	0.247578	NO	NO	NO
RPKM_pLKO_control	Syce1	1.90881	2.00881	Yes	Yes	Yes
RPKM_pLKO_control	Insyn2a	0.277381	0.377381	NO	Yes	NO
RPKM_pLKO_control	Ppfia4	1.17738	1.27738	NO	NO	NO
RPKM_pLKO_control	Vwa5b2	0.0628632	0.162863	NO	NO	NO
RPKM_pLKO_control	2810459M11Rik	0.0845753	0.184575	NO	NO	NO
RPKM_pLKO_control	Rfpl4	0.00684919	0.106849	NO	NO	NO
RPKM_pLKO_control	Gm13889	0.228272	0.328272	NO	NO	NO
RPKM_pLKO_control	Btbd18	0.314958	0.414958	NO	NO	NO
RPKM_pLKO_control	Akain1	0.00430316	0.104303	NO	Yes	NO
RPKM_pLKO_control	1500009L16Rik	6.57074	6.67074	NO	NO	NO
RPKM_pLKO_control	6430550D23Rik	0.0817746	0.181775	NO	NO	NO
RPKM_pLKO_control	Sult6b2	0.0142246	0.114225	NO	NO	NO
RPKM_pLKO_control	Kcnt1	0.0217336	0.121734	NO	NO	NO
RPKM_pLKO_control	Lrrc74b	0.023744	0.123744	NO	NO	NO
RPKM_pLKO_control	Armh1	0.0108264	0.110826	NO	NO	NO
RPKM_pLKO_control	Mak	0.270916	0.370916	NO	NO	NO
RPKM_pLKO_control	Lrp4	0.216037	0.316037	NO	NO	NO
RPKM_pLKO_control	Adtrp	0.0284157	0.128416	NO	NO	NO
RPKM_pLKO_control	Ddx4	1.42281	1.52281	NO	NO	NO
RPKM_pLKO_control	Nat8f4	0.26232	0.36232	NO	NO	NO
RPKM_pLKO_control	Cdin1	7.2383	7.3383	Yes	Yes	Yes
RPKM_pLKO_control	Pianp	4.26286	4.36286	NO	NO	NO
RPKM_pLKO_control	Thap3	3.91728	4.01728	NO	NO	NO
RPKM_pLKO_control	Zfp691	1.34883	1.44883	NO	NO	NO
RPKM_pLKO_control	Ttc39a	0.41422	0.51422	NO	NO	NO
RPKM_pLKO_control	Ndrg2	6.26552	6.36552	NO	NO	NO
RPKM_pLKO_control	Dlgap2	0.0320815	0.132082	NO	NO	NO
RPKM_pLKO_control	Atg4c	1.98321	2.08321	NO	Yes	NO
RPKM_pLKO_control	Rwdd2a	1.84063	1.94063	NO	Yes	NO
RPKM_pLKO_control	Als2cl	2.17152	2.27152	NO	NO	NO
RPKM_pLKO_control	Hk1	19.0475	19.1475	NO	NO	NO
RPKM_pLKO_control	Msh5	0.125749	0.225749	NO	NO	NO
RPKM_pLKO_control	Clcnka	0.204328	0.304328	NO	NO	NO
RPKM_pLKO_control	Rbm46	0.162959	0.262959	Yes	Yes	Yes
RPKM_pLKO_control	Sbk2	0.110107	0.210107	NO	NO	NO
RPKM_pLKO_control	Tlcd3b	0.852044	0.952044	NO	NO	NO
RPKM_pLKO_control	Eng	6.52093	6.62093	NO	NO	NO
RPKM_pLKO_control	Smtn	9.08409	9.18409	NO	NO	NO
RPKM_pLKO_control	Itih4	0.0258885	0.125888	NO	NO	NO
RPKM_pLKO_control	Cacnb1	2.23376	2.33376	NO	NO	NO
RPKM_pLKO_control	Grid2ip	0.0812155	0.181215	NO	NO	NO
RPKM_pLKO_control	Casz1	1.3477	1.4477	NO	NO	NO
RPKM_pLKO_control	Ube2v2	0.396227	0.496227	NO	Yes	NO
RPKM_pLKO_control	Polq	0.841481	0.941481	Yes	Yes	Yes
RPKM_pLKO_control	Dusp15	0.107522	0.207522	NO	NO	NO
RPKM_pLKO_control	Gjc1	16.4412	16.5412	NO	NO	NO
RPKM_pLKO_control	B3gnt5	1.18091	1.28091	NO	NO	NO
RPKM_pLKO_control	Rbp4	0.540488	0.640488	NO	NO	NO
RPKM_pLKO_control	Ppm1b	4.69312	4.79312	NO	NO	NO
RPKM_pLKO_control	Esrrb	70.3638	70.4638	NO	NO	NO
RPKM_pLKO_control	Grip2	0.0478304	0.14783	NO	NO	NO
RPKM_pLKO_control	Shd	0.259751	0.359751	NO	NO	NO
RPKM_pLKO_control	Wdr35	6.81437	6.91437	NO	NO	NO
RPKM_pLKO_control	Itgb6	0.00416425	0.104164	NO	NO	NO
RPKM_pLKO_control	Lnx1	1.31474	1.41474	NO	NO	NO
RPKM_pLKO_control	Lrrc57	5.66872	5.76872	NO	NO	NO
RPKM_pLKO_control	Pigp	1.8117	1.9117	NO	NO	NO
RPKM_pLKO_control	Hagh	9.48137	9.58137	NO	NO	NO
RPKM_pLKO_control	Nek6	7.78104	7.88104	NO	NO	NO
RPKM_pLKO_control	Atp6v1c2	0.264606	0.364606	NO	NO	NO
RPKM_pLKO_control	Slc44a1	11.9777	12.0777	NO	NO	NO
RPKM_pLKO_control	Crybb3	0.314639	0.414639	NO	NO	NO
RPKM_pLKO_control	Proser2	0.530855	0.630855	NO	NO	NO
RPKM_pLKO_control	Ppp1r16b	0.0604538	0.160454	NO	NO	NO
RPKM_pLKO_control	Rsph6a	0.0958604	0.19586	NO	NO	NO
RPKM_pLKO_control	Nectin2	26.2996	26.3996	NO	NO	NO
RPKM_pLKO_control	Rab17	0.111784	0.211784	NO	NO	NO
RPKM_pLKO_control	Nr5a2	8.01825	8.11825	NO	NO	NO
RPKM_pLKO_control	Kctd18	2.47292	2.57292	NO	NO	NO
RPKM_pLKO_control	Mab21l4	0.0133959	0.113396	NO	NO	NO
RPKM_pLKO_control	Ralgps2	2.67725	2.77725	NO	Yes	NO
RPKM_pLKO_control	Cldn10	0.0175808	0.117581	NO	NO	NO
RPKM_pLKO_control	Tmem9	13.8458	13.9458	NO	NO	NO
RPKM_pLKO_control	Cgref1	3.85897	3.95897	NO	NO	NO
RPKM_pLKO_control	Klhdc7b	0.00181141	0.101811	NO	NO	NO
RPKM_pLKO_control	Plekha6	0.680373	0.780373	NO	NO	NO
RPKM_pLKO_control	Nfasc	0.380001	0.480001	NO	NO	NO
RPKM_pLKO_control	Svip	0.970707	1.07071	Yes	NO	NO
RPKM_pLKO_control	Grm2	0.12892	0.22892	NO	NO	NO
RPKM_pLKO_control	Rnf152	0.0470039	0.147004	Yes	Yes	Yes
RPKM_pLKO_control	Ccdc112	1.39623	1.49623	NO	NO	NO
RPKM_pLKO_control	Gstm4	2.96298	3.06298	NO	NO	NO
RPKM_pLKO_control	Triml2	17.4939	17.5939	NO	NO	NO
RPKM_pLKO_control	Cd300lg	0.0147032	0.114703	NO	NO	NO
RPKM_pLKO_control	Timd2	0.0127378	0.112738	Yes	Yes	Yes
RPKM_pLKO_control	Nxt2	2.58805	2.68805	NO	Yes	NO
RPKM_pLKO_control	Eda2r	6.87155	6.97155	NO	Yes	NO
RPKM_pLKO_control	Islr2	0.422622	0.522622	NO	NO	NO
RPKM_pLKO_control	Tmem184a	0.48244	0.58244	NO	NO	NO
RPKM_pLKO_control	Cdc45	11.9889	12.0889	NO	NO	NO
RPKM_pLKO_control	Efcab6	0.0427604	0.14276	NO	NO	NO
RPKM_pLKO_control	Tgm1	3.46245	3.56245	NO	NO	NO
RPKM_pLKO_control	Siva1	20.6999	20.7999	NO	NO	NO
RPKM_pLKO_control	Gm15455	0.232688	0.332688	NO	NO	NO
RPKM_pLKO_control	Cblc	1.42058	1.52058	NO	NO	NO
RPKM_pLKO_control	Taf7l2	0.0316852	0.131685	Yes	Yes	Yes
RPKM_pLKO_control	Fam166b	0.526733	0.626733	NO	NO	NO
RPKM_pLKO_control	Efna1	1.19081	1.29081	NO	NO	NO
RPKM_pLKO_control	1700012B07Rik	0	0.1	Yes	Yes	Yes
RPKM_pLKO_control	Stra6	0.272439	0.372439	NO	NO	NO
RPKM_pLKO_control	Mpst	6.99594	7.09594	NO	NO	NO
RPKM_pLKO_control	Parvg	0.249667	0.349667	NO	NO	NO
RPKM_pLKO_control	Troap	6.33052	6.43052	NO	NO	NO
RPKM_pLKO_control	Fam174b	0.523075	0.623075	NO	NO	NO
RPKM_pLKO_control	Sh3d21	1.77197	1.87197	NO	NO	NO
RPKM_pLKO_control	Stk32c	0.167865	0.267865	NO	NO	NO
RPKM_pLKO_control	Nrip2	0.209038	0.309038	NO	NO	NO
RPKM_pLKO_control	Syce3	0.511678	0.611678	NO	NO	NO
RPKM_pLKO_control	Mdm1	4.21458	4.31458	NO	NO	NO
RPKM_pLKO_control	Susd2	2.19984	2.29984	NO	NO	NO
RPKM_pLKO_control	Pkp3	1.03133	1.13133	NO	NO	NO
RPKM_pLKO_control	Nudt17	1.70733	1.80733	NO	NO	NO
RPKM_pLKO_control	Rpl10l	9.21895	9.31895	Yes	NO	NO
RPKM_pLKO_control	Pcx	4.61063	4.71063	NO	NO	NO
RPKM_pLKO_control	Hif3a	1.22657	1.32657	NO	NO	NO
RPKM_pLKO_control	Ccdc138	1.88617	1.98617	NO	NO	NO
RPKM_pLKO_control	Sgsm1	0.910059	1.01006	NO	NO	NO
RPKM_pLKO_control	Crybg2	0.995347	1.09535	NO	NO	NO
RPKM_pLKO_control	Lrrc51	0.982404	1.0824	NO	NO	NO
RPKM_pLKO_control	Megf6	0.126649	0.226649	NO	NO	NO
RPKM_pLKO_control	Ccdc81	0.0379517	0.137952	NO	NO	NO
RPKM_pLKO_control	Fyb2	0.0542241	0.154224	NO	Yes	NO
RPKM_pLKO_control	Eml2	5.99425	6.09425	NO	NO	NO
RPKM_pLKO_control	Pkd2l2	0.746636	0.846636	NO	NO	NO
RPKM_pLKO_control	Micos10	11.9926	12.0926	NO	NO	NO
RPKM_pLKO_control	Gprasp2	1.2979	1.3979	NO	NO	NO
RPKM_pLKO_control	Hcrtr1	0.0188805	0.118881	NO	NO	NO
RPKM_pLKO_control	Adgre5	12.007	12.107	NO	NO	NO
RPKM_pLKO_control	Ppp1r36	0.0567758	0.156776	NO	NO	NO
RPKM_pLKO_control	Elf3	4.94893	5.04893	NO	NO	NO
RPKM_pLKO_control	Shisal1	0.0518039	0.151804	NO	NO	NO
RPKM_pLKO_control	Begain	0.717417	0.817417	NO	NO	NO
RPKM_pLKO_control	Plekhb1	2.36101	2.46101	NO	NO	NO
RPKM_pLKO_control	Otud6a	0.0511118	0.151112	NO	NO	NO
RPKM_pLKO_control	Fgfr3	0.190228	0.290228	NO	NO	NO
RPKM_pLKO_control	Birc7	0.0525753	0.152575	NO	NO	NO
RPKM_pLKO_control	Zbtb5	0.668622	0.768622	NO	NO	NO
RPKM_pLKO_control	Susd1	0.655332	0.755332	NO	NO	NO
RPKM_pLKO_control	Coq8a	1.81549	1.91549	NO	NO	NO
RPKM_pLKO_control	Atp2a3	0.575262	0.675262	NO	NO	NO
RPKM_pLKO_control	Fignl1	8.20909	8.30909	NO	NO	NO
RPKM_pLKO_control	2700049A03Rik	3.46447	3.56447	NO	NO	NO
RPKM_pLKO_control	4930579F01Rik	0.0176888	0.117689	NO	NO	NO
RPKM_pLKO_control	Coa8	6.06579	6.16579	NO	NO	NO
RPKM_pLKO_control	Mapk8ip3	7.17949	7.27949	NO	NO	NO
RPKM_pLKO_control	Mttp	0.529791	0.629791	NO	NO	NO
RPKM_pLKO_control	Abi3	4.0154	4.1154	NO	NO	NO
RPKM_pLKO_control	Rhpn1	0.711517	0.811517	NO	NO	NO
RPKM_pLKO_control	Cyp2d22	0.218075	0.318075	NO	NO	NO
RPKM_pLKO_control	1810010H24Rik	0.407636	0.507636	NO	NO	NO
RPKM_pLKO_control	Neurl1a	2.85369	2.95369	NO	NO	NO
RPKM_pLKO_control	Arhgap19	7.42044	7.52044	NO	NO	NO
RPKM_pLKO_control	S100a14	0.0644459	0.164446	NO	NO	NO
RPKM_pLKO_control	Pgam5	14.4851	14.5851	NO	NO	NO
RPKM_pLKO_control	Lrrcc1	0.95632	1.05632	Yes	Yes	Yes
RPKM_pLKO_control	Prph	0.951606	1.05161	NO	NO	NO
RPKM_pLKO_control	Plxdc1	1.44606	1.54606	NO	NO	NO
RPKM_pLKO_control	Sult6b1	1.21928	1.31928	NO	NO	NO
RPKM_pLKO_control	Etfrf1	2.65691	2.75691	NO	NO	NO
RPKM_pLKO_control	Satb1	0.515616	0.615616	Yes	Yes	Yes
RPKM_pLKO_control	Cfap70	0.0594196	0.15942	NO	NO	NO
RPKM_pLKO_control	Chn2	0.332237	0.432237	NO	NO	NO
RPKM_pLKO_control	Nkd1	0.495206	0.595206	NO	NO	NO
RPKM_pLKO_control	Cacna1h	0.439182	0.539182	NO	NO	NO
RPKM_pLKO_control	Fbxo27	0.726143	0.826143	NO	NO	NO
RPKM_pLKO_control	Dnaaf4	0.469669	0.569669	NO	NO	NO
RPKM_pLKO_control	Ush1c	0.0133355	0.113335	NO	NO	NO
RPKM_pLKO_control	Pde9a	2.11408	2.21408	NO	NO	NO
RPKM_pLKO_control	Brme1	0.672073	0.772073	NO	NO	NO
RPKM_pLKO_control	Rab37	0.165403	0.265403	NO	NO	NO
RPKM_pLKO_control	Tcf19	4.25833	4.35833	NO	NO	NO
RPKM_pLKO_control	Wdr90	1.39176	1.49176	NO	NO	NO
RPKM_pLKO_control	Tmprss3	0.0105452	0.110545	NO	NO	NO
RPKM_pLKO_control	Odad3	0.572452	0.672452	NO	NO	NO
RPKM_pLKO_control	Ppp1r10	17.3519	17.4519	NO	NO	NO
RPKM_pLKO_control	Tbc1d24	1.56538	1.66538	NO	NO	NO
RPKM_pLKO_control	Homer2	0.227899	0.327899	NO	NO	NO
RPKM_pLKO_control	Bcap29	3.20617	3.30617	NO	NO	NO
RPKM_pLKO_control	Pias2	14.4872	14.5872	NO	NO	NO
RPKM_pLKO_control	Mtm1	1.08746	1.18746	Yes	Yes	Yes
RPKM_pLKO_control	Phf11c	0.328529	0.428529	NO	NO	NO
RPKM_pLKO_control	Ccser1	0.0286436	0.128644	Yes	Yes	Yes
RPKM_pLKO_control	Marchf5	13.9623	14.0623	NO	NO	NO
RPKM_pLKO_control	Erlin1	4.65315	4.75315	NO	NO	NO
RPKM_pLKO_control	Cep55	10.1205	10.2205	NO	NO	NO
RPKM_pLKO_control	Bcas1	0.747898	0.847898	NO	NO	NO
RPKM_pLKO_control	Mipol1	1.64245	1.74245	Yes	Yes	Yes
RPKM_pLKO_control	Dpys	0.7969	0.8969	NO	NO	NO
RPKM_pLKO_control	Sipa1	8.33475	8.43475	NO	NO	NO
RPKM_pLKO_control	Ablim3	0.147711	0.247711	NO	NO	NO
RPKM_pLKO_control	Akap11	5.26022	5.36022	NO	NO	NO
RPKM_pLKO_control	Dap3	8.04444	8.14444	NO	NO	NO
RPKM_pLKO_control	Pdzk1ip1	0.0542205	0.154221	NO	NO	NO
RPKM_pLKO_control	Sec22c	1.35705	1.45705	NO	NO	NO
RPKM_pLKO_control	Egfl7	7.36076	7.46076	NO	NO	NO
RPKM_pLKO_control	Vill	2.661	2.761	NO	NO	NO
RPKM_pLKO_control	Zfp961	8.1022	8.2022	NO	NO	NO
RPKM_pLKO_control	Cdpf1	2.98353	3.08353	NO	NO	NO
RPKM_pLKO_control	Arhgap8	6.38248	6.48248	NO	NO	NO
RPKM_pLKO_control	Pwwp3b	0.862367	0.962367	Yes	Yes	Yes
RPKM_pLKO_control	Trappc9	2.83959	2.93959	NO	NO	NO
RPKM_pLKO_control	Catsperg1	0.0915167	0.191517	NO	NO	NO
RPKM_pLKO_control	Trank1	0.043482	0.143482	NO	NO	NO
RPKM_pLKO_control	Dnah6	0.0809937	0.180994	NO	NO	NO
RPKM_pLKO_control	Zfp229	1.58933	1.68933	Yes	Yes	Yes
RPKM_pLKO_control	Mpp4	0.871909	0.971909	NO	NO	NO
RPKM_pLKO_control	Hspb2	1.57771	1.67771	NO	NO	NO
RPKM_pLKO_control	Robo3	0.311312	0.411312	NO	NO	NO
RPKM_pLKO_control	Adamts20	0.0378005	0.137801	Yes	Yes	Yes
RPKM_pLKO_control	Eomes	2.13515	2.23515	NO	NO	NO
RPKM_pLKO_control	Coro2a	4.14208	4.24208	NO	NO	NO
RPKM_pLKO_control	Bend4	2.75567	2.85567	NO	NO	NO
RPKM_pLKO_control	Slc52a3	1.56987	1.66987	NO	NO	NO
RPKM_pLKO_control	P2rx2	0.276269	0.376269	NO	NO	NO
RPKM_pLKO_control	Dcaf4	17.4494	17.5494	NO	NO	NO
RPKM_pLKO_control	Majin	0.0956753	0.195675	NO	NO	NO
RPKM_pLKO_control	Rgs9	0.090456	0.190456	NO	NO	NO
RPKM_pLKO_control	Nsun6	0.541553	0.641553	Yes	Yes	Yes
RPKM_pLKO_control	Trim45	0.782596	0.882596	NO	NO	NO
RPKM_pLKO_control	Dcaf17	1.9392	2.0392	NO	NO	NO
RPKM_pLKO_control	Tmem215	0	0.1	Yes	Yes	Yes
RPKM_pLKO_control	Slc4a5	1.18203	1.28203	NO	NO	NO
RPKM_pLKO_control	Ccdc74a	0.601379	0.701379	NO	NO	NO
RPKM_pLKO_control	Dmkn	0.242269	0.342269	NO	NO	NO
RPKM_pLKO_control	Zfp712	0.0817795	0.18178	NO	NO	NO
RPKM_pLKO_control	Mgll	0.289552	0.389552	NO	NO	NO
RPKM_pLKO_control	Cspg5	0.352713	0.452713	NO	NO	NO
RPKM_pLKO_control	6030458C11Rik	1.45069	1.55069	NO	NO	NO
RPKM_pLKO_control	Fam219b	1.61706	1.71706	NO	NO	NO
RPKM_pLKO_control	Fam122b	1.81467	1.91467	NO	NO	NO
RPKM_pLKO_control	Ptp4a3	12.7558	12.8558	NO	NO	NO
RPKM_pLKO_control	Rab3a	2.14212	2.24212	NO	NO	NO
RPKM_pLKO_control	Spock1	0.0527125	0.152713	NO	NO	NO
RPKM_pLKO_control	Vmac	5.42168	5.52168	NO	NO	NO
RPKM_pLKO_control	Slc39a11	3.91575	4.01575	NO	NO	NO
RPKM_pLKO_control	Sec14l1	24.5557	24.6557	NO	NO	NO
RPKM_pLKO_control	Dgkz	13.3377	13.4377	NO	NO	NO
RPKM_pLKO_control	Dynlt1f	3.56174	3.66174	NO	NO	NO
RPKM_pLKO_control	Dynlt1a	0.75195	0.85195	NO	NO	NO
RPKM_pLKO_control	Dynlt1c	4.16402	4.26402	NO	NO	NO
RPKM_pLKO_control	Large2	3.01188	3.11188	NO	NO	NO
RPKM_pLKO_control	Klhl33	0.00472628	0.104726	NO	NO	NO
RPKM_pLKO_control	Cep95	2.92773	3.02773	NO	NO	NO
RPKM_pLKO_control	Cfap77	0.627636	0.727636	NO	NO	NO
RPKM_pLKO_control	Spata31d1b	0.226823	0.326823	NO	NO	NO
RPKM_pLKO_control	Rhbdf2	10.6622	10.7622	NO	NO	NO
RPKM_pLKO_control	Sirt4	1.4392	1.5392	NO	NO	NO
RPKM_pLKO_control	Rad18	3.45181	3.55181	NO	NO	NO
RPKM_pLKO_control	Chchd6	5.86375	5.96375	NO	NO	NO
RPKM_pLKO_control	Wipf3	0.480029	0.580029	NO	NO	NO
RPKM_pLKO_control	Nrg2	0.182564	0.282564	NO	NO	NO
RPKM_pLKO_control	Zyg11a	2.44262	2.54262	NO	NO	NO
RPKM_pLKO_control	1110032F04Rik	0.0549534	0.154953	NO	NO	NO
RPKM_pLKO_control	Tex11	0.341607	0.441607	NO	NO	NO
RPKM_pLKO_control	Mtbp	1.76159	1.86159	NO	NO	NO
RPKM_pLKO_control	Fam83h	2.66508	2.76508	NO	NO	NO
RPKM_pLKO_control	Arhgap39	3.73276	3.83276	NO	NO	NO
RPKM_pLKO_control	Sugp2	3.14549	3.24549	NO	NO	NO
RPKM_pLKO_control	Ccdc125	0.486974	0.586974	NO	NO	NO
RPKM_pLKO_control	Pdcd4	5.30477	5.40477	NO	NO	NO
RPKM_pLKO_control	Ncmap	0.261811	0.361811	NO	NO	NO
RPKM_pLKO_control	Zdhhc24	1.98585	2.08585	NO	NO	NO
RPKM_pLKO_control	Sarm1	0.590405	0.690405	NO	NO	NO
RPKM_pLKO_control	Kcns3	0.442072	0.542072	NO	NO	NO
RPKM_pLKO_control	C2cd4c	0.0457512	0.145751	NO	NO	NO
RPKM_pLKO_control	Ccdc127	1.33054	1.43054	NO	NO	NO
RPKM_pLKO_control	Gtse1	49.172	49.272	NO	NO	NO
RPKM_pLKO_control	Endou	0.0295664	0.129566	NO	NO	NO
RPKM_pLKO_control	Cd163	0.00440994	0.10441	Yes	Yes	Yes
RPKM_pLKO_control	Rnf144b	0.269207	0.369207	NO	NO	NO
RPKM_pLKO_control	Elmod2	1.11213	1.21213	NO	NO	NO
RPKM_pLKO_control	Lrrc36	0.0510857	0.151086	NO	NO	NO
RPKM_pLKO_control	Rbm20	0.129805	0.229805	NO	NO	NO
RPKM_pLKO_control	Dbndd1	0.598952	0.698952	NO	NO	NO
RPKM_pLKO_control	Abat	0.719487	0.819487	NO	NO	NO
RPKM_pLKO_control	Mal	0.0429622	0.142962	NO	NO	NO
RPKM_pLKO_control	Obscn	0.00961414	0.109614	NO	NO	NO
RPKM_pLKO_control	Actl10	0.0278604	0.12786	NO	NO	NO
RPKM_pLKO_control	Bdh2	2.5157	2.6157	NO	NO	NO
RPKM_pLKO_control	Lrrc56	1.23405	1.33405	NO	NO	NO
RPKM_pLKO_control	Dis3l2	3.45866	3.55866	NO	NO	NO
RPKM_pLKO_control	Fam221a	0.946543	1.04654	NO	NO	NO
RPKM_pLKO_control	Olfr376	0.00865151	0.108652	NO	NO	NO
RPKM_pLKO_control	Fxyd4	0.245896	0.345896	NO	NO	NO
RPKM_pLKO_control	Rlbp1	0.885435	0.985435	NO	NO	NO
RPKM_pLKO_control	Cacna2d2	0.443543	0.543543	NO	NO	NO
RPKM_pLKO_control	Camk2b	3.68685	3.78685	NO	NO	NO
RPKM_pLKO_control	Map3k9	0.982005	1.08201	NO	NO	NO
RPKM_pLKO_control	Rasgrp4	2.39767	2.49767	NO	NO	NO
RPKM_pLKO_control	Septin6	1.78741	1.88741	NO	NO	NO
RPKM_pLKO_control	Klk11	0.329524	0.429524	NO	NO	NO
RPKM_pLKO_control	Cebpzos	6.34644	6.44644	NO	NO	NO
RPKM_pLKO_control	Mroh4	0.0172982	0.117298	NO	NO	NO
RPKM_pLKO_control	Zfp516	4.53077	4.63077	NO	NO	NO
RPKM_pLKO_control	Mymx	18.7377	18.8377	NO	NO	NO
RPKM_pLKO_control	Plekhd1	0.808971	0.908971	NO	NO	NO
RPKM_pLKO_control	Zkscan7	0.204187	0.304187	NO	NO	NO
RPKM_pLKO_control	Trim61	0.047688	0.147688	NO	NO	NO
RPKM_pLKO_control	Slc10a1	0.0674789	0.167479	NO	NO	NO
RPKM_pLKO_control	Eif1ad8	0.109876	0.209876	Yes	Yes	Yes
RPKM_pLKO_control	Eif1ad4	0.0392318	0.139232	Yes	Yes	Yes
RPKM_pLKO_control	Slc8b1	4.51928	4.61928	NO	NO	NO
RPKM_pLKO_control	Slc5a6	2.26225	2.36225	NO	NO	NO
RPKM_pLKO_control	Ect2	15.7257	15.8257	NO	NO	NO
RPKM_pLKO_control	Slc45a3	0.780392	0.880392	NO	NO	NO
RPKM_pLKO_control	Gal3st1	0.2887	0.3887	NO	NO	NO
RPKM_pLKO_control	Ablim2	0.171348	0.271348	NO	NO	NO
RPKM_pLKO_control	Tsc22d1	57.99	58.09	NO	NO	NO
RPKM_pLKO_control	Clcc1	2.89566	2.99566	NO	NO	NO
RPKM_pLKO_control	Fbxw7	4.23797	4.33797	NO	NO	NO
RPKM_pLKO_control	Afap1l2	0.315165	0.415165	NO	NO	NO
RPKM_pLKO_control	Rapgef3	1.01477	1.11477	NO	NO	NO
RPKM_pLKO_control	Otub2	0.951725	1.05173	NO	NO	NO
RPKM_pLKO_control	Igsf5	0	0.1	NO	Yes	NO
RPKM_pLKO_control	Aamdc	2.6646	2.7646	NO	NO	NO
RPKM_pLKO_control	Rpgr	1.48132	1.58132	Yes	Yes	Yes
RPKM_pLKO_control	Prdm16	0.233145	0.333145	NO	NO	NO
RPKM_pLKO_control	Tfdp2	4.67363	4.77363	NO	NO	NO
RPKM_pLKO_control	Rhox13	0.177839	0.277839	NO	NO	NO
RPKM_pLKO_control	Zscan4b	0.0819323	0.181932	Yes	NO	NO
RPKM_pLKO_control	Psrc1	55.2629	55.3629	NO	NO	NO
RPKM_pLKO_control	Gpr155	0.296062	0.396062	NO	NO	NO
RPKM_pLKO_control	Tmem132b	0.0129039	0.112904	NO	NO	NO
RPKM_pLKO_control	Kcng2	0.0289022	0.128902	NO	NO	NO
RPKM_pLKO_control	Caly	0.169399	0.269399	NO	NO	NO
RPKM_pLKO_control	Bend7	0.276967	0.376967	NO	NO	NO
RPKM_pLKO_control	Ddah2	19.1013	19.2013	NO	NO	NO
RPKM_pLKO_control	Dcaf12l1	1.73378	1.83378	NO	Yes	NO
RPKM_pLKO_control	Ddx19b	3.17668	3.27668	NO	NO	NO
RPKM_pLKO_control	Kif17	0.181962	0.281962	NO	NO	NO
RPKM_pLKO_control	Lancl1	3.67784	3.77784	NO	NO	NO
RPKM_pLKO_control	Ndfip2	7.48509	7.58509	NO	NO	NO
RPKM_pLKO_control	Ddx43	1.0438	1.1438	NO	NO	NO
RPKM_pLKO_control	Lysmd4	0.463479	0.563479	NO	NO	NO
RPKM_pLKO_control	Cldn7	2.73349	2.83349	NO	NO	NO
RPKM_pLKO_control	Pag1	0.463884	0.563884	NO	NO	NO
RPKM_pLKO_control	Acp4	0.0238226	0.123823	NO	NO	NO
RPKM_pLKO_control	Tmc8	1.02519	1.12519	NO	NO	NO
RPKM_pLKO_control	Ccer2	0.251335	0.351335	NO	NO	NO
RPKM_pLKO_control	Cfap73	0.0679424	0.167942	NO	NO	NO
RPKM_pLKO_control	Foxl3	0	0.1	NO	NO	NO
RPKM_pLKO_control	Nek10	0.0182122	0.118212	NO	NO	NO
RPKM_pLKO_control	Gm3336	0.519728	0.619728	NO	NO	NO
RPKM_pLKO_control	Gfy	0.186041	0.286041	NO	NO	NO
RPKM_pLKO_control	Tgfbr3l	0.90038	1.00038	NO	NO	NO
RPKM_pLKO_control	Kifc1	7.22327	7.32327	NO	NO	NO
RPKM_pLKO_control	Dclk2	3.0564	3.1564	NO	NO	NO
RPKM_pLKO_control	Gm5741	0.438506	0.538506	NO	NO	NO
RPKM_pLKO_control	Ccdc170	0.0880627	0.188063	NO	NO	NO
RPKM_pLKO_control	Nuggc	0.147202	0.247202	NO	NO	NO
RPKM_pLKO_control	Gm5901	0.448387	0.548387	NO	NO	NO
RPKM_pLKO_control	Rgs22	0.0944625	0.194462	NO	NO	NO
RPKM_pLKO_control	Gprc5b	3.37081	3.47081	NO	NO	NO
RPKM_pLKO_control	Map7	5.40013	5.50013	NO	NO	NO
RPKM_pLKO_control	Aatk	0.202949	0.302949	NO	NO	NO
RPKM_pLKO_control	Ccpg1os	3.50248	3.60248	NO	NO	NO
RPKM_pLKO_control	Adgrg1	1.13606	1.23606	NO	NO	NO
RPKM_pLKO_control	Gm7694	0.258123	0.358123	NO	NO	NO
RPKM_pLKO_control	Trp53inp1	21.7538	21.8538	NO	NO	NO
RPKM_pLKO_control	Spc25	12.7687	12.8687	NO	NO	NO
RPKM_pLKO_control	Ascc1	10.7316	10.8316	NO	NO	NO
RPKM_pLKO_control	Slc38a3	1.48588	1.58588	NO	NO	NO
RPKM_pLKO_control	Sptbn4	1.33505	1.43505	NO	NO	NO
RPKM_pLKO_control	Tex14	1.21474	1.31474	NO	NO	NO
RPKM_pLKO_control	Cacng5	0.0164846	0.116485	NO	NO	NO
RPKM_pLKO_control	AI987944	0.906141	1.00614	Yes	Yes	Yes
RPKM_pLKO_control	Pnck	0.456416	0.556416	NO	NO	NO
RPKM_pLKO_control	Vps37d	1.50146	1.60146	NO	NO	NO
RPKM_pLKO_control	Adgrb2	1.19348	1.29348	NO	NO	NO
RPKM_pLKO_control	Tac2	0.0481532	0.148153	NO	NO	NO
RPKM_pLKO_control	Magec2	0.792543	0.892543	Yes	Yes	Yes
RPKM_pLKO_control	E330021D16Rik	0.0230962	0.123096	NO	NO	NO
RPKM_pLKO_control	Cyp4f14	0.0103202	0.11032	NO	NO	NO
RPKM_pLKO_control	Oprk1	0.032442	0.132442	Yes	Yes	Yes
RPKM_pLKO_control	Kcnj11	0.0335473	0.133547	NO	NO	NO
RPKM_pLKO_control	Reep2	1.7322	1.8322	NO	NO	NO
RPKM_pLKO_control	Gm11544	0.0150345	0.115034	NO	NO	NO
RPKM_pLKO_control	Scarb1	12.3982	12.4982	NO	NO	NO
RPKM_pLKO_control	Nrxn2	0.536352	0.636352	NO	NO	NO
RPKM_pLKO_control	Kat6b	17.4868	17.5868	NO	NO	NO
RPKM_pLKO_control	Tmem39a	13.5061	13.6061	NO	NO	NO
RPKM_pLKO_control	Papln	0.0545733	0.154573	NO	NO	NO
RPKM_pLKO_control	2610528A11Rik	0.149023	0.249023	NO	NO	NO
RPKM_pLKO_control	Shisa8	0.831444	0.931444	NO	NO	NO
RPKM_pLKO_control	Fignl2	1.38418	1.48418	NO	NO	NO
RPKM_pLKO_control	Rnf223	0.309396	0.409396	NO	NO	NO
RPKM_pLKO_control	Fam160a2	2.55078	2.65078	NO	NO	NO
RPKM_pLKO_control	Zfp976	0.515132	0.615132	NO	NO	NO
RPKM_pLKO_control	Bcat2	26.3436	26.4436	NO	NO	NO
RPKM_pLKO_control	Cep57l1	2.6182	2.7182	NO	NO	NO
RPKM_pLKO_control	C87436	1.65936	1.75936	NO	NO	NO
RPKM_pLKO_control	Zfp383	1.50871	1.60871	NO	NO	NO
RPKM_pLKO_control	Ggnbp1	0.699008	0.799008	NO	NO	NO
RPKM_pLKO_control	Cacna1a	2.21517	2.31517	NO	NO	NO
RPKM_pLKO_control	Greb1	0.410668	0.510668	NO	NO	NO
RPKM_pLKO_control	Tmem106c	6.74487	6.84487	NO	NO	NO
RPKM_pLKO_control	Amz2	5.05168	5.15168	NO	NO	NO
RPKM_pLKO_control	Pan2	7.29593	7.39593	NO	NO	NO
RPKM_pLKO_control	Rundc3a	2.88112	2.98112	NO	NO	NO
RPKM_pLKO_control	Slc25a19	3.74737	3.84737	NO	NO	NO
RPKM_pLKO_control	Cyfip2	3.17646	3.27646	NO	NO	NO
RPKM_pLKO_control	Mlst8	3.87182	3.97182	NO	NO	NO
RPKM_pLKO_control	Cpt1c	12.9155	13.0155	NO	NO	NO
RPKM_pLKO_control	Tjap1	14.1164	14.2164	NO	NO	NO
RPKM_pLKO_control	Slc30a6	5.78937	5.88937	NO	NO	NO
RPKM_pLKO_control	Cmtm7	17.5274	17.6274	NO	NO	NO
RPKM_pLKO_control	Inca1	0.413295	0.513295	NO	NO	NO
RPKM_pLKO_control	D430019H16Rik	0.205627	0.305627	NO	NO	NO
RPKM_pLKO_control	Zfp82	0.671411	0.771411	NO	NO	NO
RPKM_pLKO_control	Slco2b1	0.00665301	0.106653	NO	NO	NO
RPKM_pLKO_control	Llgl2	13.3988	13.4988	NO	NO	NO
RPKM_pLKO_control	Gstz1	7.0526	7.1526	NO	NO	NO
RPKM_pLKO_control	Rad51b	0.444513	0.544513	NO	NO	NO
RPKM_pLKO_control	Matn4	0.122744	0.222744	NO	NO	NO
RPKM_pLKO_control	Cars	16.1011	16.2011	NO	NO	NO
RPKM_pLKO_control	Cdh23	0.0577886	0.157789	NO	NO	NO
RPKM_pLKO_control	Hrh1	0.0910529	0.191053	NO	NO	NO
RPKM_pLKO_control	Smc5	5.09744	5.19744	NO	NO	NO
RPKM_pLKO_control	Serinc2	2.68951	2.78951	NO	NO	NO
RPKM_pLKO_control	Elmod3	2.97054	3.07054	NO	NO	NO
RPKM_pLKO_control	Smim22	0.159712	0.259712	NO	NO	NO
RPKM_pLKO_control	Scn5a	0.0959235	0.195924	NO	NO	NO
RPKM_pLKO_control	Tmem205	6.857	6.957	NO	NO	NO
RPKM_pLKO_control	Mtf2	19.7066	19.8066	NO	NO	NO
RPKM_pLKO_control	Sez6l	0.0432507	0.143251	NO	NO	NO
RPKM_pLKO_control	Efcab15	0.633278	0.733278	NO	NO	NO
RPKM_pLKO_control	Echdc2	15.3404	15.4404	NO	NO	NO
RPKM_pLKO_control	Zfp850	1.71429	1.81429	NO	NO	NO
RPKM_pLKO_control	Bmp8a	0.894898	0.994898	NO	NO	NO
RPKM_pLKO_control	Hsf4	0.415456	0.515456	NO	NO	NO
RPKM_pLKO_control	Gm5141	0.120836	0.220836	NO	NO	NO
RPKM_pLKO_control	Mib2	4.00142	4.10142	NO	NO	NO
RPKM_pLKO_control	Sun1	12.4241	12.5241	NO	NO	NO
RPKM_pLKO_control	Fsbp	0.716675	0.816675	NO	NO	NO
RPKM_pLKO_control	Prdm2	7.04888	7.14888	NO	NO	NO
RPKM_pLKO_control	Epha10	0.0448884	0.144888	NO	NO	NO
RPKM_pLKO_control	9030624G23Rik	0.121007	0.221007	NO	NO	NO
RPKM_pLKO_control	Zfp995	0.488263	0.588263	NO	NO	NO
RPKM_pLKO_control	Usp17le	0.226293	0.326293	NO	NO	NO
RPKM_pLKO_control	Kcnj12	0.117855	0.217855	NO	NO	NO
RPKM_pLKO_control	Mical3	2.36084	2.46084	NO	NO	NO
RPKM_pLKO_control	Gm19345	0.63772	0.73772	NO	NO	NO
RPKM_pLKO_control	Bin2	6.61939	6.71939	NO	NO	NO
RPKM_pLKO_control	Ifitm7	0.690393	0.790393	NO	NO	NO
RPKM_pLKO_control	Calcoco2	3.2949	3.3949	NO	NO	NO
RPKM_pLKO_control	Cbs	4.12111	4.22111	NO	NO	NO
RPKM_pLKO_control	Ankra2	3.38189	3.48189	NO	NO	NO
RPKM_pLKO_control	Ager	0.394982	0.494982	NO	NO	NO
RPKM_pLKO_control	Gabpb1	8.16052	8.26052	NO	NO	NO
RPKM_pLKO_control	Scube1	0.0782547	0.178255	NO	NO	NO
RPKM_pLKO_control	Clip4	1.36375	1.46375	NO	NO	NO
RPKM_pLKO_control	Chka	11.1951	11.2951	NO	NO	NO
RPKM_pLKO_control	Myh14	1.49535	1.59535	NO	NO	NO
RPKM_pLKO_control	Slc4a9	0.0617385	0.161738	NO	NO	NO
RPKM_pLKO_control	Aire	0.670374	0.770374	NO	NO	NO
RPKM_pLKO_control	Cdc7	4.39227	4.49227	NO	NO	NO
RPKM_pLKO_control	Tktl2	0.0111176	0.111118	Yes	NO	NO
RPKM_pLKO_control	Sec1	0.35182	0.45182	NO	NO	NO
RPKM_pLKO_control	Gja3	0.0304753	0.130475	NO	NO	NO
RPKM_pLKO_control	Pgf	1.38636	1.48636	NO	NO	NO
RPKM_pLKO_control	C8g	0.475857	0.575857	NO	NO	NO
RPKM_pLKO_control	Ano7	0.0548044	0.154804	NO	NO	NO
RPKM_pLKO_control	B3gnt9	3.39179	3.49179	NO	NO	NO
RPKM_pLKO_control	Eya2	0.162053	0.262053	NO	NO	NO
RPKM_pLKO_control	Sema6c	1.68437	1.78437	NO	NO	NO
RPKM_pLKO_control	Arvcf	4.39772	4.49772	NO	NO	NO
RPKM_pLKO_control	AA414768	0.767859	0.867859	NO	NO	NO
RPKM_pLKO_control	Ada	3.83696	3.93696	NO	NO	NO
RPKM_pLKO_control	Tle5	158.673	158.773	NO	NO	NO
RPKM_pLKO_control	Epc1	2.1144	2.2144	NO	NO	NO
RPKM_pLKO_control	Kcnip2	0.630966	0.730966	NO	NO	NO
RPKM_pLKO_control	Spns2	0.836953	0.936953	NO	NO	NO
RPKM_pLKO_control	Rad21l	0.00634268	0.106343	NO	NO	NO
RPKM_pLKO_control	Ahsg	0.213339	0.313339	NO	NO	NO
RPKM_pLKO_control	Slc17a5	2.38637	2.48637	NO	NO	NO
RPKM_pLKO_control	Slc19a2	16.0338	16.1338	NO	NO	NO
RPKM_pLKO_control	Cited1	1.0398	1.1398	NO	NO	NO
RPKM_pLKO_control	Arc	4.25704	4.35704	NO	NO	NO
RPKM_pLKO_control	Gm867	12.395	12.495	NO	NO	NO
RPKM_pLKO_control	Zbtb24	2.74327	2.84327	NO	NO	NO
RPKM_pLKO_control	Zmat4	0.407232	0.507232	NO	NO	NO
RPKM_pLKO_control	Tbxa2r	0.289938	0.389938	NO	NO	NO
RPKM_pLKO_control	Foxn1	0.00945547	0.109455	NO	NO	NO
RPKM_pLKO_control	Adck1	2.68631	2.78631	NO	NO	NO
RPKM_pLKO_control	Gm11238	0	0.1	NO	NO	NO
RPKM_pLKO_control	Dazl	0.456143	0.556143	Yes	Yes	Yes
RPKM_pLKO_control	Fkbp6	0.413042	0.513042	NO	NO	NO
RPKM_pLKO_control	Tnnt1	1.49713	1.59713	NO	NO	NO
RPKM_pLKO_control	Ecel1	0.0456934	0.145693	NO	NO	NO
RPKM_pLKO_control	Lamb3	0.130326	0.230326	NO	NO	NO
RPKM_pLKO_control	Rad51d	1.7207	1.8207	NO	NO	NO
RPKM_pLKO_control	Sh3gl3	3.75926	3.85926	NO	Yes	NO
RPKM_pLKO_control	Itga6	13.1597	13.2597	NO	NO	NO
RPKM_pLKO_control	Snap91	0.118648	0.218648	Yes	Yes	Yes
RPKM_pLKO_control	Ube2t	8.26389	8.36389	NO	NO	NO
RPKM_pLKO_control	Dmc1	0.674033	0.774033	NO	NO	NO
RPKM_pLKO_control	Cryaa	0	0.1	NO	NO	NO
RPKM_pLKO_control	Mroh2a	0.513873	0.613873	NO	NO	NO
RPKM_pLKO_control	Ace	0.236791	0.336791	NO	NO	NO
RPKM_pLKO_control	Csmd2	0.0232287	0.123229	NO	NO	NO
RPKM_pLKO_control	Glrb	0.215752	0.315752	Yes	Yes	Yes
RPKM_pLKO_control	Rasal1	0.764516	0.864516	NO	NO	NO
RPKM_pLKO_control	Tekt1	1.23984	1.33984	NO	NO	NO
RPKM_pLKO_control	Cnga3	0.723486	0.823486	NO	NO	NO
RPKM_pLKO_control	P2ry1	0.106056	0.206056	Yes	Yes	Yes
RPKM_pLKO_control	Cyb561a3	3.09411	3.19411	NO	NO	NO
RPKM_pLKO_control	Deaf1	7.46995	7.56995	NO	NO	NO
RPKM_pLKO_control	Tjp3	2.72024	2.82024	NO	NO	NO
RPKM_pLKO_control	Pcnt	6.06617	6.16617	NO	NO	NO
RPKM_pLKO_control	Cobl	11.2127	11.3127	NO	NO	NO
RPKM_pLKO_control	Artn	0.321503	0.421503	NO	NO	NO
RPKM_pLKO_control	Tmem201	8.90838	9.00838	NO	NO	NO
RPKM_pLKO_control	Septin4	0.442829	0.542829	NO	NO	NO
RPKM_pLKO_control	Chit1	0.117665	0.217665	NO	NO	NO
RPKM_pLKO_control	Tcf24	0.251653	0.351653	NO	NO	NO
RPKM_pLKO_control	Cbfa2t2	8.4432	8.5432	NO	NO	NO
RPKM_pLKO_control	Tbx1	0.151991	0.251991	NO	NO	NO
RPKM_pLKO_control	Rps6ka1	31.062	31.162	NO	NO	NO
RPKM_pLKO_control	Ildr1	2.86094	2.96094	NO	NO	NO
RPKM_pLKO_control	Wnt11	0.539854	0.639854	NO	NO	NO
RPKM_pLKO_control	B4galt4	1.33973	1.43973	NO	NO	NO
RPKM_pLKO_control	Grk3	0.948204	1.0482	NO	NO	NO
RPKM_pLKO_control	Osgepl1	2.26623	2.36623	NO	NO	NO
RPKM_pLKO_control	D630023F18Rik	1.54011	1.64011	NO	NO	NO
RPKM_pLKO_control	Zmym6	2.36819	2.46819	NO	NO	NO
RPKM_pLKO_control	Dapk1	6.02805	6.12805	NO	NO	NO
RPKM_pLKO_control	Ubxn10	0.441496	0.541496	NO	NO	NO
RPKM_pLKO_control	Prc1	17.9544	18.0544	NO	NO	NO
RPKM_pLKO_control	Unk	5.92701	6.02701	NO	NO	NO
RPKM_pLKO_control	Ghrl	0.628507	0.728507	NO	NO	NO
RPKM_pLKO_control	Atl2	6.51746	6.61746	NO	NO	NO
RPKM_pLKO_control	Xndc1	3.90956	4.00956	NO	NO	NO
RPKM_pLKO_control	Pacsin1	1.43086	1.53086	NO	NO	NO
RPKM_pLKO_control	Camk2a	2.05971	2.15971	NO	NO	NO
RPKM_pLKO_control	Tspear	0.200999	0.300999	NO	NO	NO
RPKM_pLKO_control	Sct	0.872177	0.972177	NO	NO	NO
RPKM_pLKO_control	Alpl	39.3925	39.4925	NO	NO	NO
RPKM_pLKO_control	Kif14	1.36296	1.46296	NO	NO	NO
RPKM_pLKO_control	Rskr	0.0245972	0.124597	NO	NO	NO
RPKM_pLKO_control	Lrit3	0.0110675	0.111067	NO	NO	NO
RPKM_pLKO_control	Crhr2	0.0486035	0.148604	NO	NO	NO
RPKM_pLKO_control	Atp9a	3.28202	3.38202	NO	NO	NO
RPKM_pLKO_control	Cd1d2	0	0.1	NO	NO	NO
RPKM_pLKO_control	Mme	1.76518	1.86518	NO	Yes	NO
RPKM_pLKO_control	Sox17	0.0738626	0.173863	Yes	NO	NO
RPKM_pLKO_control	Tcl1	10.4412	10.5412	NO	NO	NO
RPKM_pLKO_control	Egflam	0.0379152	0.137915	NO	NO	NO
RPKM_pLKO_control	Tfr2	0.105259	0.205259	NO	NO	NO
RPKM_pLKO_control	Hormad1	0.358165	0.458165	NO	NO	NO
RPKM_pLKO_control	Amph	1.47055	1.57055	Yes	Yes	Yes
RPKM_pLKO_control	Mpv17l	1.19892	1.29892	NO	NO	NO
RPKM_pLKO_control	Spata7	2.71363	2.81363	NO	NO	NO
RPKM_pLKO_control	Radil	2.04899	2.14899	NO	NO	NO
RPKM_pLKO_control	Psd2	0.145489	0.245489	NO	NO	NO
RPKM_pLKO_control	Tfcp2	2.59362	2.69362	NO	NO	NO
RPKM_pLKO_control	Brd8	11.4447	11.5447	NO	NO	NO
RPKM_pLKO_control	Zap70	0.365737	0.465737	NO	NO	NO
RPKM_pLKO_control	Btn2a2	0.134785	0.234785	NO	NO	NO
RPKM_pLKO_control	Fhod3	0.916471	1.01647	NO	NO	NO
RPKM_pLKO_control	Arhgap33	0.852798	0.952798	NO	NO	NO
RPKM_pLKO_control	Nxf2	0.0812028	0.181203	NO	Yes	NO
RPKM_pLKO_control	Mturn	0.599013	0.699013	NO	NO	NO
RPKM_pLKO_control	Rnf32	0.685797	0.785797	NO	NO	NO
RPKM_pLKO_control	Poln	0.0622949	0.162295	NO	NO	NO
RPKM_pLKO_control	Ccdc63	0.109216	0.209216	NO	NO	NO
RPKM_pLKO_control	Nanog	39.8011	39.9011	NO	NO	NO
RPKM_pLKO_control	Cox6b2	17.963	18.063	NO	NO	NO
RPKM_pLKO_control	Per3	0.650066	0.750066	NO	NO	NO
RPKM_pLKO_control	Csnk1e	18.327	18.427	NO	NO	NO
RPKM_pLKO_control	Ccdc169	0.0207458	0.120746	NO	NO	NO
RPKM_pLKO_control	Pld6	0.755635	0.855635	NO	NO	NO
RPKM_pLKO_control	Shisa7	0.871299	0.971299	NO	NO	NO
RPKM_pLKO_control	Plppr2	4.65493	4.75493	NO	NO	NO
RPKM_pLKO_control	Ism2	0.414615	0.514615	NO	NO	NO
RPKM_pLKO_control	Wnk2	0.346588	0.446588	NO	NO	NO
RPKM_pLKO_control	Igdcc4	2.20463	2.30463	NO	NO	NO
RPKM_pLKO_control	Slc26a8	0.0584335	0.158434	NO	NO	NO
RPKM_pLKO_control	Zfand4	0.232726	0.332726	NO	NO	NO
RPKM_pLKO_control	Plcb3	18.9228	19.0228	NO	NO	NO
RPKM_pLKO_control	Mybl1	1.23528	1.33528	NO	NO	NO
RPKM_pLKO_control	Snapc4	6.77665	6.87665	NO	NO	NO
RPKM_pLKO_control	Usp45	3.53893	3.63893	NO	NO	NO
RPKM_pLKO_control	Atp1a3	5.73171	5.83171	NO	NO	NO
RPKM_pLKO_control	Tmem91	0.603213	0.703213	NO	NO	NO
RPKM_pLKO_control	Ttc14	2.3259	2.4259	NO	NO	NO
RPKM_pLKO_control	Mid1	9.457	9.557	Yes	Yes	Yes
RPKM_pLKO_control	Dolpp1	5.04217	5.14217	NO	NO	NO
RPKM_pLKO_control	Lrriq4	0.394872	0.494872	NO	NO	NO
RPKM_pLKO_control	Acer2	0.802978	0.902978	NO	NO	NO
RPKM_pLKO_control	Plp1	0.21989	0.31989	NO	NO	NO
RPKM_pLKO_control	Ttc16	0.228116	0.328116	NO	NO	NO
RPKM_pLKO_control	Ralgps1	1.64252	1.74252	NO	NO	NO
RPKM_pLKO_control	Atp4a	0.216232	0.316232	NO	NO	NO
RPKM_pLKO_control	Gapdhs	0.209506	0.309506	NO	NO	NO
RPKM_pLKO_control	Lhx2	0.371617	0.471617	NO	NO	NO
RPKM_pLKO_control	Scml2	0.179838	0.279838	Yes	Yes	Yes
RPKM_pLKO_control	Tmem14a	0.717539	0.817539	NO	NO	NO
RPKM_pLKO_control	Kcnc3	1.60179	1.70179	NO	NO	NO
RPKM_pLKO_control	Becn2	0.0113706	0.111371	NO	NO	NO
RPKM_pLKO_control	Suv39h1	9.0693	9.1693	NO	NO	NO
RPKM_pLKO_control	Osbpl6	0.409121	0.509121	NO	Yes	NO
RPKM_pLKO_control	Tmx2	3.92895	4.02895	NO	NO	NO
RPKM_pLKO_control	Ephb2	2.01478	2.11478	NO	NO	NO
RPKM_pLKO_control	Sec24a	3.65895	3.75895	NO	NO	NO
RPKM_pLKO_control	Ppp1r14d	0.476805	0.576805	NO	NO	NO
RPKM_pLKO_control	Inpp4a	1.32849	1.42849	NO	NO	NO
RPKM_pLKO_control	Haus2	7.32548	7.42548	NO	NO	NO
RPKM_pLKO_control	Col17a1	0.134853	0.234853	NO	NO	NO
RPKM_pLKO_control	Cpeb3	0.443149	0.543149	NO	NO	NO
RPKM_pLKO_control	Wdr76	4.83742	4.93742	NO	NO	NO
RPKM_pLKO_control	Trim11	5.20173	5.30173	NO	NO	NO
RPKM_pLKO_control	Tekt5	0.0518798	0.15188	NO	NO	NO
RPKM_pLKO_control	Astl	0.00440305	0.104403	NO	NO	NO
RPKM_pLKO_control	Pla2g10	2.06131	2.16131	NO	NO	NO
RPKM_pLKO_control	Rnf112	0.0269453	0.126945	NO	NO	NO
RPKM_pLKO_control	Lzts3	1.51058	1.61058	NO	NO	NO
RPKM_pLKO_control	Usp43	0.605031	0.705031	NO	NO	NO
RPKM_pLKO_control	Syngr4	0.158838	0.258838	NO	NO	NO
RPKM_pLKO_control	Foxa2	0.451632	0.551632	NO	NO	NO
RPKM_pLKO_control	Aifm3	0.529182	0.629182	NO	NO	NO
RPKM_pLKO_control	Fgf11	0.480606	0.580606	NO	NO	NO
RPKM_pLKO_control	Dhx35	5.94541	6.04541	NO	NO	NO
RPKM_pLKO_control	Emilin3	0.37487	0.47487	NO	NO	NO
RPKM_pLKO_control	Ptprt	0.0266726	0.126673	Yes	Yes	Yes
RPKM_pLKO_control	Tlcd2	1.17927	1.27927	NO	NO	NO
RPKM_pLKO_control	Apba2	0.473733	0.573733	NO	NO	NO
RPKM_pLKO_control	Pcsk6	4.44059	4.54059	NO	NO	NO
RPKM_pLKO_control	Myo18a	5.81784	5.91784	NO	NO	NO
RPKM_pLKO_control	Kif7	1.1297	1.2297	NO	NO	NO
RPKM_pLKO_control	Sez6	0.0568476	0.156848	NO	NO	NO
RPKM_pLKO_control	Hnf1b	0.224884	0.324884	NO	NO	NO
RPKM_pLKO_control	Nmb	2.78469	2.88469	NO	NO	NO
RPKM_pLKO_control	Misp3	0.769489	0.869489	NO	NO	NO
RPKM_pLKO_control	Chrdl2	0	0.1	NO	NO	NO
RPKM_pLKO_control	Art5	0.241731	0.341731	NO	NO	NO
RPKM_pLKO_control	Prkcg	4.40515	4.50515	NO	NO	NO
RPKM_pLKO_control	Rad51c	1.80254	1.90254	NO	NO	NO
RPKM_pLKO_control	Foxred1	5.99708	6.09708	NO	NO	NO
RPKM_pLKO_control	Birc2	4.53969	4.63969	NO	NO	NO
RPKM_pLKO_control	Kyat3	2.38767	2.48767	NO	NO	NO
RPKM_pLKO_control	Nek1	2.04388	2.14388	Yes	Yes	Yes
RPKM_pLKO_control	Polr3gl	5.68121	5.78121	NO	NO	NO
RPKM_pLKO_control	Tuft1	1.59168	1.69168	NO	NO	NO
RPKM_pLKO_control	Rorc	0.0273933	0.127393	NO	NO	NO
RPKM_pLKO_control	Tm6sf2	0.106353	0.206353	NO	NO	NO
RPKM_pLKO_control	Tmem161a	6.30409	6.40409	NO	NO	NO
RPKM_pLKO_control	Kcnh2	1.89437	1.99437	NO	NO	NO
RPKM_pLKO_control	Cmc4	0.574053	0.674053	NO	NO	NO
RPKM_pLKO_control	Ccdc130	2.91058	3.01058	NO	NO	NO
RPKM_pLKO_control	Ngb	0.118348	0.218348	NO	NO	NO
RPKM_pLKO_control	Apela	24.5717	24.6717	NO	NO	NO
RPKM_pLKO_control	Car7	0.13133	0.23133	NO	NO	NO
RPKM_pLKO_control	Kctd19	0.0950008	0.195001	NO	NO	NO
RPKM_pLKO_control	Nrn1l	0.580891	0.680891	NO	NO	NO
RPKM_pLKO_control	Capn5	4.89579	4.99579	NO	NO	NO
RPKM_pLKO_control	Gab1	35.2478	35.3478	NO	NO	NO
RPKM_pLKO_control	Caprin2	3.83188	3.93188	NO	NO	NO
RPKM_pLKO_control	Hsdl2	3.10574	3.20574	NO	NO	NO
RPKM_pLKO_control	Syt14	0.585711	0.685711	NO	Yes	NO
RPKM_pLKO_control	Tspan33	0.980195	1.08019	NO	NO	NO
RPKM_pLKO_control	Slc7a1	8.30756	8.40756	NO	NO	NO
RPKM_pLKO_control	Vsx2	0.0245988	0.124599	NO	NO	NO
RPKM_pLKO_control	Fdx1	0.959973	1.05997	NO	NO	NO
RPKM_pLKO_control	Azin2	3.19348	3.29348	NO	NO	NO
RPKM_pLKO_control	Dlgap3	5.98682	6.08682	NO	NO	NO
RPKM_pLKO_control	Cenpa	21.2575	21.3575	NO	NO	NO
RPKM_pLKO_control	Erg	0.0345053	0.134505	NO	NO	NO
RPKM_pLKO_control	Lmo1	0.551332	0.651332	NO	NO	NO
RPKM_pLKO_control	Tmem138	3.3445	3.4445	NO	NO	NO
RPKM_pLKO_control	Aktip	6.7136	6.8136	NO	NO	NO
RPKM_pLKO_control	Nfe2	0.0801685	0.180169	NO	NO	NO
RPKM_pLKO_control	Cbln2	0.0119823	0.111982	Yes	Yes	Yes
RPKM_pLKO_control	Acy3	3.20131	3.30131	NO	NO	NO
RPKM_pLKO_control	Gzmm	0.44503	0.54503	NO	NO	NO
RPKM_pLKO_control	Osbp2	0.272617	0.372617	NO	NO	NO
RPKM_pLKO_control	Mdm4	8.14773	8.24773	NO	NO	NO
RPKM_pLKO_control	Qsox2	2.62438	2.72438	NO	NO	NO
RPKM_pLKO_control	Agfg2	4.74055	4.84055	NO	NO	NO
RPKM_pLKO_control	Aldoc	3.57908	3.67908	NO	NO	NO
RPKM_pLKO_control	Hus1	3.91253	4.01253	NO	NO	NO
RPKM_pLKO_control	Slc9a8	4.19798	4.29798	NO	NO	NO
RPKM_pLKO_control	Stil	2.30704	2.40704	NO	NO	NO
RPKM_pLKO_control	Col13a1	0.267195	0.367195	NO	NO	NO
RPKM_pLKO_control	Pex26	1.12394	1.22394	NO	NO	NO
RPKM_pLKO_control	Plekha7	7.50761	7.60761	NO	NO	NO
RPKM_pLKO_control	Ccna1	0.076644	0.176644	NO	NO	NO
RPKM_pLKO_control	Dtl	16.5662	16.6662	NO	NO	NO
RPKM_pLKO_control	Pigo	4.05078	4.15078	NO	NO	NO
RPKM_pLKO_control	E2f2	1.77982	1.87982	NO	NO	NO
RPKM_pLKO_control	Mad2l2	14.2049	14.3049	NO	NO	NO
RPKM_pLKO_control	Cenpi	3.22542	3.32542	NO	NO	NO
RPKM_pLKO_control	Bckdhb	12.6311	12.7311	Yes	Yes	Yes
RPKM_pLKO_control	Arx	0.0107909	0.110791	NO	NO	NO
RPKM_pLKO_control	Ggt1	1.37864	1.47864	NO	NO	NO
RPKM_pLKO_control	Itga3	6.83452	6.93452	NO	NO	NO
RPKM_pLKO_control	Car12	1.00166	1.10166	NO	NO	NO
RPKM_pLKO_control	Mmp11	7.97711	8.07711	NO	NO	NO
RPKM_pLKO_control	Trim68	1.11464	1.21464	Yes	Yes	Yes
RPKM_pLKO_control	Hhipl2	0.0196089	0.119609	NO	NO	NO
RPKM_pLKO_control	Nadsyn1	0.740212	0.840212	NO	NO	NO
RPKM_pLKO_control	Zfp51	1.47102	1.57102	NO	Yes	NO
RPKM_pLKO_control	Sema4f	0.542157	0.642157	NO	NO	NO
RPKM_pLKO_control	Gm27021	6.95891	7.05891	NO	NO	NO
RPKM_pLKO_control	Aldh2	41.5551	41.6551	NO	NO	NO
RPKM_pLKO_control	Porcn	10.7604	10.8604	NO	NO	NO
RPKM_pLKO_control	Mtrr	4.15832	4.25832	NO	NO	NO
RPKM_pLKO_control	Gm11715	5.09126	5.19126	NO	NO	NO
RPKM_pLKO_control	Gpr50	0.14831	0.24831	Yes	NO	NO
RPKM_pLKO_control	Lrrc31	0.121411	0.221411	NO	NO	NO
RPKM_pLKO_control	Gm45929	1.11504	1.21504	NO	NO	NO
RPKM_pLKO_control	Dpm1	4.04237	4.14237	NO	NO	NO
RPKM_pLKO_control	Tmem218	1.40171	1.50171	NO	NO	NO
RPKM_pLKO_control	Zfp119b	0.550894	0.650894	NO	NO	NO
RPKM_pLKO_control	Synpo2l	0.202579	0.302579	NO	NO	NO
RPKM_pLKO_control	Mei1	0.035485	0.135485	NO	NO	NO
RPKM_pLKO_control	Ank1	0.121903	0.221903	NO	NO	NO
RPKM_pLKO_control	Pde4c	0.279844	0.379844	NO	NO	NO
RPKM_pLKO_control	Asic3	0.114538	0.214538	NO	NO	NO
RPKM_pLKO_control	Asb10	0.0133402	0.11334	NO	NO	NO
RPKM_pLKO_control	Bend6	0.399529	0.499529	NO	NO	NO
RPKM_pLKO_control	Ankle1	0.621375	0.721375	NO	NO	NO
RPKM_pLKO_control	Osbpl7	2.62259	2.72259	NO	NO	NO
RPKM_pLKO_control	Ankrd23	0.704959	0.804959	NO	NO	NO
RPKM_pLKO_control	Khk	2.54892	2.64892	NO	NO	NO
RPKM_pLKO_control	Ankrd39	1.21203	1.31203	NO	NO	NO
RPKM_pLKO_control	Scrib	10.9811	11.0811	NO	NO	NO
RPKM_pLKO_control	Paqr6	0.0835928	0.183593	NO	NO	NO
RPKM_pLKO_control	Fam126b	0.590604	0.690604	NO	NO	NO
RPKM_pLKO_control	Lgi2	0.34992	0.44992	NO	NO	NO
RPKM_pLKO_control	Gata4	0.541544	0.641544	NO	NO	NO
RPKM_pLKO_control	Zfp606	0.448675	0.548675	NO	Yes	NO
RPKM_pLKO_control	Pikfyve	2.48689	2.58689	NO	NO	NO
RPKM_pLKO_control	AF067061	0	0.1	NO	NO	NO
RPKM_pLKO_control	Gm21761	0.622676	0.722676	NO	NO	NO
RPKM_pLKO_control	Pmvk	9.91506	10.0151	NO	NO	NO
RPKM_pLKO_control	Zfp442	0.206571	0.306571	NO	Yes	NO
RPKM_pLKO_control	Ccdc122	1.64589	1.74589	NO	NO	NO
RPKM_pLKO_control	Rassf6	0.249437	0.349437	Yes	NO	NO
RPKM_pLKO_control	Igfbp2	102.864	102.964	NO	NO	NO
RPKM_pLKO_control	Usp37	4.58641	4.68641	NO	NO	NO
RPKM_pLKO_control	Caps2	0.166872	0.266872	Yes	Yes	Yes
RPKM_pLKO_control	Lrcol1	0.060175	0.160175	NO	NO	NO
RPKM_pLKO_control	Cabp1	2.13956	2.23956	NO	NO	NO
RPKM_pLKO_control	Cypt3	0.0145684	0.114568	NO	NO	NO
RPKM_pLKO_control	Cnksr2	0.0866321	0.186632	Yes	Yes	Yes
RPKM_pLKO_control	Gemin8	1.17848	1.27848	NO	Yes	NO
RPKM_pLKO_control	Egf	0.100634	0.200634	NO	NO	NO
RPKM_pLKO_control	Pde4a	2.65636	2.75636	NO	NO	NO
RPKM_pLKO_control	Tex26	0.0600783	0.160078	NO	NO	NO
RPKM_pLKO_control	Glb1l2	0.250716	0.350716	NO	NO	NO
RPKM_pLKO_control	Ankrd61	0.150602	0.250602	NO	NO	NO
RPKM_pLKO_control	Marchf11	0.153954	0.253954	Yes	Yes	Yes
RPKM_pLKO_control	Dixdc1	1.10615	1.20615	NO	NO	NO
RPKM_pLKO_control	Lingo1	0.72887	0.82887	NO	NO	NO
RPKM_pLKO_control	Celf6	0.0315056	0.131506	NO	NO	NO
RPKM_pLKO_control	Tmem209	12.8596	12.9596	NO	NO	NO
RPKM_pLKO_control	Mkrn1	49.251	49.351	NO	NO	NO
RPKM_pLKO_control	Elovl2	0.647963	0.747963	NO	NO	NO
RPKM_pLKO_control	Celf5	2.55209	2.65209	NO	NO	NO
RPKM_pLKO_control	Unc5a	0.189789	0.289789	NO	NO	NO
RPKM_pLKO_control	Klhl12	5.34005	5.44005	NO	NO	NO
RPKM_pLKO_control	1700037H04Rik	34.9856	35.0856	NO	NO	NO
RPKM_pLKO_control	Bmf	1.46212	1.56212	NO	NO	NO
RPKM_pLKO_control	Il12rb2	0.11182	0.21182	Yes	Yes	Yes
RPKM_pLKO_control	Kcnn2	0.372311	0.472311	Yes	Yes	Yes
RPKM_pLKO_control	Hnf4a	0.055998	0.155998	NO	NO	NO
RPKM_pLKO_control	Cux2	0.389727	0.489727	NO	NO	NO
RPKM_pLKO_control	Ihh	0.0762538	0.176254	NO	NO	NO
RPKM_pLKO_control	Pkp1	0.0299401	0.12994	NO	NO	NO
RPKM_pLKO_control	Eif2ak3	1.17191	1.27191	NO	NO	NO
RPKM_pLKO_control	Actg1	1.66932	1.76932	NO	NO	NO
RPKM_pLKO_control	Asgr2	0.0562171	0.156217	NO	NO	NO
RPKM_pLKO_control	Crhr1	0	0.1	NO	NO	NO
RPKM_pLKO_control	Cd79b	0.456343	0.556343	NO	NO	NO
RPKM_pLKO_control	Krt13	0.165225	0.265225	NO	NO	NO
RPKM_pLKO_control	Krt19	3.4467	3.5467	NO	NO	NO
RPKM_pLKO_control	Aldh6a1	3.53278	3.63278	NO	NO	NO
RPKM_pLKO_control	Ppp1r1b	0.553868	0.653868	NO	NO	NO
RPKM_pLKO_control	Rdh12	0.456377	0.556377	NO	NO	NO
RPKM_pLKO_control	Dmd	3.11965	3.21965	Yes	Yes	Yes
RPKM_pLKO_control	Mpz	0.0800888	0.180089	NO	NO	NO
RPKM_pLKO_control	Etv4	25.3474	25.4474	NO	NO	NO
RPKM_pLKO_control	C8b	0.0100082	0.110008	NO	Yes	NO
RPKM_pLKO_control	Sh3bp1	18.534	18.634	NO	NO	NO
RPKM_pLKO_control	Slc27a3	2.79028	2.89028	NO	NO	NO
RPKM_pLKO_control	Mapkapk3	14.1068	14.2068	NO	NO	NO
RPKM_pLKO_control	2810408A11Rik	1.57608	1.67608	NO	NO	NO
RPKM_pLKO_control	Nudt14	4.49195	4.59195	NO	NO	NO
RPKM_pLKO_control	Rnf167	20.1869	20.2869	NO	NO	NO
RPKM_pLKO_control	Prxl2a	5.553	5.653	NO	NO	NO
RPKM_pLKO_control	Rasgef1a	0.343538	0.443538	NO	NO	NO
RPKM_pLKO_control	Prss36	1.4046	1.5046	NO	NO	NO
RPKM_pLKO_control	Klk1	0.298935	0.398935	NO	NO	NO
RPKM_pLKO_control	Frmpd3	0.00842271	0.108423	NO	Yes	NO
RPKM_pLKO_control	Klk8	4.78176	4.88176	NO	NO	NO
RPKM_pLKO_control	Sntg2	0.0252486	0.125249	Yes	Yes	Yes
RPKM_pLKO_control	Rab3d	2.48352	2.58352	NO	NO	NO
RPKM_pLKO_control	Slc6a16	0.248741	0.348741	NO	NO	NO
RPKM_pLKO_control	Suclg2	3.36665	3.46665	Yes	Yes	Yes
RPKM_pLKO_control	Zfp354a	0.295234	0.395234	NO	NO	NO
RPKM_pLKO_control	Igsf9b	1.79648	1.89648	NO	NO	NO
RPKM_pLKO_control	Hspa12a	0.617996	0.717996	NO	NO	NO
RPKM_pLKO_control	Clgn	1.85083	1.95083	NO	NO	NO
RPKM_pLKO_control	Gal	0.284402	0.384402	NO	NO	NO
RPKM_pLKO_control	Gpx3	16.522	16.622	NO	NO	NO
RPKM_pLKO_control	Habp2	0.0862312	0.186231	NO	NO	NO
RPKM_pLKO_control	Fmo1	0	0.1	Yes	Yes	Yes
RPKM_pLKO_control	Poll	3.80635	3.90635	NO	NO	NO
RPKM_pLKO_control	Gdf15	1.56656	1.66656	NO	NO	NO
RPKM_pLKO_control	Smim8	4.35078	4.45078	NO	NO	NO
RPKM_pLKO_control	Zfand1	1.5956	1.6956	NO	NO	NO
RPKM_pLKO_control	Tfb2m	0.996108	1.09611	NO	NO	NO
RPKM_pLKO_control	Abhd6	1.57575	1.67575	NO	NO	NO
RPKM_pLKO_control	Adora2a	0.401418	0.501418	NO	NO	NO
RPKM_pLKO_control	Alox12	0.326292	0.426292	NO	NO	NO
RPKM_pLKO_control	Hyal1	4.36089	4.46089	NO	NO	NO
RPKM_pLKO_control	Rnf181	22.2394	22.3394	NO	NO	NO
RPKM_pLKO_control	C130073F10Rik	0.691687	0.791687	NO	NO	NO
RPKM_pLKO_control	Trappc6a	7.51571	7.61571	NO	NO	NO
RPKM_pLKO_control	Fam111a	6.54624	6.64624	NO	NO	NO
RPKM_pLKO_control	Prr5	3.22202	3.32202	NO	NO	NO
RPKM_pLKO_control	Col26a1	0.119674	0.219674	NO	NO	NO
RPKM_pLKO_control	Fbxl21	0.271749	0.371749	NO	NO	NO
RPKM_pLKO_control	Ccdc28a	1.20076	1.30076	NO	NO	NO
RPKM_pLKO_control	Pyy	0.0177389	0.117739	NO	NO	NO
RPKM_pLKO_control	Gpr142	0	0.1	NO	NO	NO
RPKM_pLKO_control	Hid1	1.13521	1.23521	NO	NO	NO
RPKM_pLKO_control	Cyp11a1	0.482619	0.582619	NO	NO	NO
RPKM_pLKO_control	Snx31	0.0948801	0.19488	NO	NO	NO
RPKM_pLKO_control	Cfap206	0.0594053	0.159405	NO	NO	NO
RPKM_pLKO_control	H2az2	13.4855	13.5855	NO	NO	NO
RPKM_pLKO_control	Fbln1	14.0162	14.1162	NO	NO	NO
RPKM_pLKO_control	Slc4a8	0.930631	1.03063	NO	NO	NO
RPKM_pLKO_control	Plk5	2.54824	2.64824	NO	NO	NO
RPKM_pLKO_control	Acot11	0.588602	0.688602	NO	NO	NO
RPKM_pLKO_control	Atp6v0e2	4.64897	4.74897	NO	NO	NO
RPKM_pLKO_control	Dynlt2b	2.91626	3.01626	NO	NO	NO
RPKM_pLKO_control	S100pbp	6.71782	6.81782	NO	NO	NO
RPKM_pLKO_control	Pcbp3	5.56122	5.66122	NO	NO	NO
RPKM_pLKO_control	Nipal3	1.32264	1.42264	NO	NO	NO
RPKM_pLKO_control	Rpl22l1	5.29303	5.39303	NO	NO	NO
RPKM_pLKO_control	Usp48	19.697	19.797	NO	NO	NO
RPKM_pLKO_control	Spen	9.85495	9.95495	NO	NO	NO
RPKM_pLKO_control	Zfp654	1.67907	1.77907	NO	NO	NO
RPKM_pLKO_control	Slc30a3	0.667003	0.767003	NO	NO	NO
RPKM_pLKO_control	Podxl2	0.822348	0.922348	NO	NO	NO
RPKM_pLKO_control	Vwa7	0.12513	0.22513	NO	NO	NO
RPKM_pLKO_control	Jakmip1	0.304794	0.404794	NO	NO	NO
RPKM_pLKO_control	Atp6v1g2	0.773843	0.873843	NO	NO	NO
RPKM_pLKO_control	Cckar	0.00343653	0.103437	NO	NO	NO
RPKM_pLKO_control	Ulk1	25.5337	25.6337	NO	NO	NO
RPKM_pLKO_control	Abcc10	1.53072	1.63072	NO	NO	NO
RPKM_pLKO_control	Mmab	2.4095	2.5095	NO	NO	NO
RPKM_pLKO_control	Rab15	3.59677	3.69677	NO	NO	NO
RPKM_pLKO_control	Crb3	4.15085	4.25085	NO	NO	NO
RPKM_pLKO_control	Ninj2	0.161039	0.261039	NO	NO	NO
RPKM_pLKO_control	Dcbld1	3.28962	3.38962	NO	NO	NO
RPKM_pLKO_control	Ndufb8	11.3982	11.4982	NO	NO	NO
RPKM_pLKO_control	Akap7	1.47702	1.57702	NO	NO	NO
RPKM_pLKO_control	Stard3nl	8.07549	8.17549	NO	NO	NO
RPKM_pLKO_control	Nyap1	3.17753	3.27753	NO	NO	NO
RPKM_pLKO_control	Tmtc1	0.228822	0.328822	NO	Yes	NO
RPKM_pLKO_control	Slc8a2	0.605488	0.705488	NO	NO	NO
RPKM_pLKO_control	Lmntd2	0.905015	1.00502	NO	NO	NO
RPKM_pLKO_control	Fbxl3	7.8294	7.9294	NO	NO	NO
RPKM_pLKO_control	Polk	4.11387	4.21387	NO	NO	NO
RPKM_pLKO_control	Cenpx	28.8853	28.9853	NO	NO	NO
RPKM_pLKO_control	Npb	0.159451	0.259451	NO	NO	NO
RPKM_pLKO_control	Stard4	3.66548	3.76548	NO	NO	NO
RPKM_pLKO_control	Lmo7	1.9593	2.0593	Yes	Yes	Yes
RPKM_pLKO_control	Ybx2	1.63891	1.73891	NO	NO	NO
RPKM_pLKO_control	Mylpf	47.7449	47.8449	NO	NO	NO
RPKM_pLKO_control	Atxn2l	71.3665	71.4665	NO	NO	NO
RPKM_pLKO_control	Pycr1	3.88495	3.98495	NO	NO	NO
RPKM_pLKO_control	Dok7	0.110067	0.210067	NO	NO	NO
RPKM_pLKO_control	Yjefn3	0.729771	0.829771	NO	NO	NO
RPKM_pLKO_control	Eif1ad16	0.0769372	0.176937	NO	NO	NO
RPKM_pLKO_control	Gm10509	0.156027	0.256027	NO	NO	NO
RPKM_pLKO_control	Lcmt1	5.98681	6.08681	NO	NO	NO
RPKM_pLKO_control	Map4k1	3.99316	4.09316	NO	NO	NO
RPKM_pLKO_control	Sigirr	2.61971	2.71971	NO	NO	NO
RPKM_pLKO_control	Entpd6	6.6112	6.7112	NO	NO	NO
RPKM_pLKO_control	Ckmt1	4.20118	4.30118	NO	NO	NO
RPKM_pLKO_control	Eri2	1.94166	2.04166	NO	Yes	NO
RPKM_pLKO_control	Paqr8	0.667742	0.767742	NO	NO	NO
RPKM_pLKO_control	Garnl3	1.95861	2.05861	NO	NO	NO
RPKM_pLKO_control	Strbp	1.76461	1.86461	NO	NO	NO
RPKM_pLKO_control	Bcar3	3.91484	4.01484	NO	NO	NO
RPKM_pLKO_control	Mapkbp1	2.98882	3.08882	NO	NO	NO
RPKM_pLKO_control	Ndrg3	8.63467	8.73467	NO	NO	NO
RPKM_pLKO_control	Dnajb5	4.46767	4.56767	NO	NO	NO
RPKM_pLKO_control	Epb41l4b	0.321896	0.421896	NO	NO	NO
RPKM_pLKO_control	Extl1	0.527283	0.627283	NO	NO	NO
RPKM_pLKO_control	Rps21	58.3273	58.4273	NO	NO	NO
RPKM_pLKO_control	Naga	7.96713	8.06713	NO	NO	NO
RPKM_pLKO_control	Dph7	4.14808	4.24808	NO	NO	NO
RPKM_pLKO_control	Top1mt	3.41396	3.51396	NO	NO	NO
RPKM_pLKO_control	Tmprss6	0.0159022	0.115902	NO	NO	NO
RPKM_pLKO_control	Klf15	0.455714	0.555714	NO	NO	NO
RPKM_pLKO_control	Bcl2l14	0.638706	0.738706	NO	NO	NO
RPKM_pLKO_control	Pramel12	7.32073	7.42073	NO	NO	NO
RPKM_pLKO_control	Syt2	0.00894883	0.108949	NO	NO	NO
RPKM_pLKO_control	Nphp4	1.22394	1.32394	NO	NO	NO
RPKM_pLKO_control	Myl4	0.518483	0.618483	NO	NO	NO
RPKM_pLKO_control	Slc35d1	1.73297	1.83297	NO	NO	NO
RPKM_pLKO_control	Gpam	1.69606	1.79606	NO	Yes	NO
RPKM_pLKO_control	Ptk6	0.0136883	0.113688	NO	NO	NO
RPKM_pLKO_control	Ccdc163	2.50914	2.60914	NO	NO	NO
RPKM_pLKO_control	Ssr2	142.087	142.187	NO	NO	NO
RPKM_pLKO_control	Mpp2	1.65659	1.75659	NO	NO	NO
RPKM_pLKO_control	Map2k6	1.30618	1.40618	Yes	Yes	Yes
RPKM_pLKO_control	Coq3	2.36069	2.46069	NO	NO	NO
RPKM_pLKO_control	Gstm7	1.00477	1.10477	NO	NO	NO
RPKM_pLKO_control	Btf3l4	0.540064	0.640064	NO	NO	NO
RPKM_pLKO_control	Ssu2	0	0.1	NO	NO	NO
RPKM_pLKO_control	Cyb561	1.70877	1.80877	NO	NO	NO
RPKM_pLKO_control	Pabpc4	7.04744	7.14744	NO	NO	NO
RPKM_pLKO_control	Dennd2c	4.55347	4.65347	NO	NO	NO
RPKM_pLKO_control	Oxld1	0.995259	1.09526	NO	NO	NO
RPKM_pLKO_control	Slc2a8	4.22124	4.32124	NO	NO	NO
RPKM_pLKO_control	Sec61a2	9.35127	9.45127	NO	NO	NO
RPKM_pLKO_control	Aldh1l1	1.35799	1.45799	NO	NO	NO
RPKM_pLKO_control	Kcnc4	0.0578631	0.157863	NO	NO	NO
RPKM_pLKO_control	Prpf18	4.42397	4.52397	NO	NO	NO
RPKM_pLKO_control	Susd4	1.07261	1.17261	NO	NO	NO
RPKM_pLKO_control	Ndufaf1	4.78894	4.88894	NO	NO	NO
RPKM_pLKO_control	Srsf12	0.343942	0.443942	NO	NO	NO
RPKM_pLKO_control	Kyat1	2.36898	2.46898	NO	NO	NO
RPKM_pLKO_control	Snorc	0.0751724	0.175172	NO	NO	NO
RPKM_pLKO_control	Sult4a1	5.0433	5.1433	NO	NO	NO
RPKM_pLKO_control	Pecr	6.90354	7.00354	NO	NO	NO
RPKM_pLKO_control	Tvp23b	4.62643	4.72643	NO	NO	NO
RPKM_pLKO_control	Ift52	8.76127	8.86127	NO	NO	NO
RPKM_pLKO_control	Agbl2	0.127512	0.227512	NO	NO	NO
RPKM_pLKO_control	Prkaa2	0.699506	0.799506	NO	Yes	NO
RPKM_pLKO_control	Amhr2	0.703419	0.803419	NO	NO	NO
RPKM_pLKO_control	Crtac1	0.161843	0.261843	NO	NO	NO
RPKM_pLKO_control	Slc25a28	11.3071	11.4071	NO	NO	NO
RPKM_pLKO_control	Pgm2	10.9488	11.0488	NO	NO	NO
RPKM_pLKO_control	Smc4	11.6589	11.7589	NO	NO	NO
RPKM_pLKO_control	Ppp1r35	10.6353	10.7353	NO	NO	NO
RPKM_pLKO_control	Dnajc4	6.39935	6.49935	NO	NO	NO
RPKM_pLKO_control	Rrm2b	0.573348	0.673348	NO	NO	NO
RPKM_pLKO_control	Gtpbp10	2.00926	2.10926	NO	NO	NO
RPKM_pLKO_control	Uba1y	0.137614	0.237614	NO	NO	NO
RPKM_pLKO_control	Eif2s3y	5.99383	6.09383	NO	NO	NO
RPKM_pLKO_control	Dop1b	3.63122	3.73122	NO	NO	NO
RPKM_pLKO_control	Slc25a27	0.164563	0.264563	NO	NO	NO
RPKM_pLKO_control	Mettl4	2.13152	2.23152	NO	NO	NO
RPKM_pLKO_control	Kank3	5.20574	5.30574	NO	NO	NO
RPKM_pLKO_control	Gmppa	16.945	17.045	NO	NO	NO
RPKM_pLKO_control	Klf8	1.71535	1.81535	NO	NO	NO
RPKM_pLKO_control	Adat1	1.25903	1.35903	NO	NO	NO
RPKM_pLKO_control	Herpud1	6.17831	6.27831	NO	NO	NO
RPKM_pLKO_control	Kcng4	0.00254854	0.102549	NO	NO	NO
RPKM_pLKO_control	Cfap97	1.45634	1.55634	NO	NO	NO
RPKM_pLKO_control	Proz	0.0368178	0.136818	NO	NO	NO
RPKM_pLKO_control	Nutf2	3.57292	3.67292	NO	NO	NO
RPKM_pLKO_control	Zdhhc2	1.0154	1.1154	NO	Yes	NO
RPKM_pLKO_control	4933405L10Rik	0.0691684	0.169168	NO	NO	NO
RPKM_pLKO_control	1700018B08Rik	0.0277711	0.127771	NO	NO	NO
RPKM_pLKO_control	Sorl1	2.63848	2.73848	NO	NO	NO
RPKM_pLKO_control	Tmem38a	3.5608	3.6608	NO	NO	NO
RPKM_pLKO_control	Arih2	7.76699	7.86699	NO	NO	NO
RPKM_pLKO_control	Carmil2	1.44865	1.54865	NO	NO	NO
RPKM_pLKO_control	Dbt	3.97911	4.07911	NO	NO	NO
RPKM_pLKO_control	Adhfe1	0.297546	0.397546	NO	NO	NO
RPKM_pLKO_control	Tmem25	0.251815	0.351815	NO	NO	NO
RPKM_pLKO_control	Alg3	12.5596	12.6596	NO	NO	NO
RPKM_pLKO_control	Tmem44	0.573449	0.673449	NO	NO	NO
RPKM_pLKO_control	Cggbp1	14.6644	14.7644	NO	NO	NO
RPKM_pLKO_control	P4htm	0.337091	0.437091	NO	NO	NO
RPKM_pLKO_control	Pm20d1	0.365293	0.465293	NO	NO	NO
RPKM_pLKO_control	R3hdm1	14.7622	14.8622	NO	NO	NO
RPKM_pLKO_control	Rbbp5	9.6382	9.7382	NO	NO	NO
RPKM_pLKO_control	Rnf111	7.11012	7.21012	NO	NO	NO
RPKM_pLKO_control	Zbtb7c	0.177992	0.277992	NO	NO	NO
RPKM_pLKO_control	Tbc1d8	2.76687	2.86687	NO	NO	NO
RPKM_pLKO_control	Pif1	2.64829	2.74829	NO	NO	NO
RPKM_pLKO_control	Hmgcl	3.17651	3.27651	NO	NO	NO
RPKM_pLKO_control	Abcc8	0.0601257	0.160126	NO	NO	NO
RPKM_pLKO_control	Nthl1	4.72846	4.82846	NO	NO	NO
RPKM_pLKO_control	Gramd1b	3.87411	3.97411	NO	NO	NO
RPKM_pLKO_control	Rpl10a	16.573	16.673	NO	NO	NO
RPKM_pLKO_control	Olfm2	0.450149	0.550149	NO	NO	NO
RPKM_pLKO_control	Sgsm3	4.14268	4.24268	NO	NO	NO
RPKM_pLKO_control	Ppp2r5d	39.9102	40.0102	NO	NO	NO
RPKM_pLKO_control	Zfp40	0.278976	0.378976	Yes	Yes	Yes
RPKM_pLKO_control	Tdrkh	0.59895	0.69895	NO	NO	NO
RPKM_pLKO_control	Map3k4	5.37057	5.47057	NO	NO	NO
RPKM_pLKO_control	Mpzl2	3.33836	3.43836	NO	NO	NO
RPKM_pLKO_control	Tnfrsf13c	0.0839393	0.183939	NO	NO	NO
RPKM_pLKO_control	Gng13	3.17578	3.27578	NO	NO	NO
RPKM_pLKO_control	E130311K13Rik	0.403914	0.503914	NO	NO	NO
RPKM_pLKO_control	Noxo1	0.908389	1.00839	NO	NO	NO
RPKM_pLKO_control	Catsperd	0.293333	0.393333	NO	NO	NO
RPKM_pLKO_control	Gm1070	0.166689	0.266689	NO	NO	NO
RPKM_pLKO_control	Ttll1	6.3473	6.4473	NO	NO	NO
RPKM_pLKO_control	Wscd1	0.85381	0.95381	NO	NO	NO
RPKM_pLKO_control	Gm38396	2.2791	2.3791	NO	NO	NO
RPKM_pLKO_control	Gm7072	0.786137	0.886137	NO	NO	NO
RPKM_pLKO_control	Ankrd46	6.08455	6.18455	NO	NO	NO
RPKM_pLKO_control	Supt20	21.5466	21.6466	NO	NO	NO
RPKM_pLKO_control	Slc9b1	2.68053	2.78053	NO	NO	NO
RPKM_pLKO_control	Slc38a4	31.4809	31.5809	NO	NO	NO
RPKM_pLKO_control	Armh4	1.56879	1.66879	NO	Yes	NO
RPKM_pLKO_control	Fam241b	0.860912	0.960912	NO	NO	NO
RPKM_pLKO_control	Fam161b	0.43455	0.53455	NO	NO	NO
RPKM_pLKO_control	Cfap300	1.60515	1.70515	NO	NO	NO
RPKM_pLKO_control	Brd8dc	0.0731269	0.173127	NO	NO	NO
RPKM_pLKO_control	Vpreb3	0.542996	0.642996	NO	NO	NO
RPKM_pLKO_control	Elfn2	0.0259681	0.125968	NO	NO	NO
RPKM_pLKO_control	Septin3	2.63395	2.73395	NO	NO	NO
RPKM_pLKO_control	Gnaz	0.984105	1.08411	NO	NO	NO
RPKM_pLKO_control	Zfp14	0.28733	0.38733	NO	NO	NO
RPKM_pLKO_control	Relt	1.52378	1.62378	NO	NO	NO
RPKM_pLKO_control	Usp17lb	0.291457	0.391457	Yes	Yes	Yes
RPKM_pLKO_control	Usp11	5.66667	5.76667	NO	NO	NO
RPKM_pLKO_control	Hap1	5.86341	5.96341	NO	NO	NO
RPKM_pLKO_control	Coprs	11.4337	11.5337	NO	NO	NO
RPKM_pLKO_control	Cmklr1	2.45284	2.55284	NO	NO	NO
RPKM_pLKO_control	Slc2a4	0.226131	0.326131	NO	NO	NO
RPKM_pLKO_control	Fbxo48	0.135067	0.235067	Yes	Yes	Yes
RPKM_pLKO_control	Stx1a	2.24308	2.34308	NO	NO	NO
RPKM_pLKO_control	Svop	0.612637	0.712637	NO	NO	NO
RPKM_pLKO_control	Mlxipl	1.12118	1.22118	NO	NO	NO
RPKM_pLKO_control	Zfp449	0.599285	0.699285	NO	NO	NO
RPKM_pLKO_control	Pip4k2c	14.9395	15.0395	NO	NO	NO
RPKM_pLKO_control	Afg1l	2.045	2.145	NO	NO	NO
RPKM_pLKO_control	Nupr1l	0.0379408	0.137941	NO	NO	NO
RPKM_pLKO_control	Rtkn2	1.52052	1.62052	NO	NO	NO
RPKM_pLKO_control	Tpd52l1	5.3873	5.4873	Yes	Yes	Yes
RPKM_pLKO_control	Klhdc8b	1.38428	1.48428	NO	NO	NO
RPKM_pLKO_control	Fam229b	0.751331	0.851331	NO	NO	NO
RPKM_pLKO_control	Tmem108	0.754978	0.854978	NO	NO	NO
RPKM_pLKO_control	Tmem19	6.62964	6.72964	NO	NO	NO
RPKM_pLKO_control	Mtus2	0.451515	0.551515	NO	NO	NO
RPKM_pLKO_control	Pbld1	0.0039869	0.103987	NO	NO	NO
RPKM_pLKO_control	Mcam	8.00289	8.10289	NO	NO	NO
RPKM_pLKO_control	8030474K03Rik	0.697087	0.797087	NO	NO	NO
RPKM_pLKO_control	Lrp11	7.01449	7.11449	NO	NO	NO
RPKM_pLKO_control	Stac3	0.187133	0.287133	NO	NO	NO
RPKM_pLKO_control	Adgrb1	0.580737	0.680737	NO	NO	NO
RPKM_pLKO_control	Hscb	5.97384	6.07384	NO	NO	NO
RPKM_pLKO_control	Hps4	3.4658	3.5658	NO	NO	NO
RPKM_pLKO_control	Lcorl	1.24157	1.34157	Yes	Yes	Yes
RPKM_pLKO_control	Zc3h13	7.86164	7.96164	NO	NO	NO
RPKM_pLKO_control	Elapor2	0.0957191	0.195719	Yes	Yes	Yes
RPKM_pLKO_control	Slc7a4	0.360002	0.460002	NO	NO	NO
RPKM_pLKO_control	Sh3tc1	1.63946	1.73946	NO	NO	NO
RPKM_pLKO_control	Samd8	3.12365	3.22365	NO	NO	NO
RPKM_pLKO_control	Hnrnpa3	0.378477	0.478477	NO	NO	NO
RPKM_pLKO_control	Spag1	1.00956	1.10956	NO	NO	NO
RPKM_pLKO_control	Klhl8	2.75628	2.85628	NO	NO	NO
RPKM_pLKO_control	Zfp512	5.68589	5.78589	NO	NO	NO
RPKM_pLKO_control	Ppp2r2c	1.91949	2.01949	NO	NO	NO
RPKM_pLKO_control	Ccdc60	0.267689	0.367689	NO	NO	NO
RPKM_pLKO_control	Ccdc158	0.142697	0.242697	NO	NO	NO
RPKM_pLKO_control	Dis3	22.1343	22.2343	NO	NO	NO
RPKM_pLKO_control	Ap5m1	2.124	2.224	NO	NO	NO
RPKM_pLKO_control	Shld2	1.7298	1.8298	NO	NO	NO
RPKM_pLKO_control	Frmd5	1.1142	1.2142	NO	NO	NO
RPKM_pLKO_control	Polg	7.46855	7.56855	NO	NO	NO
RPKM_pLKO_control	Hmgcr	13.9278	14.0278	NO	NO	NO
RPKM_pLKO_control	Xrcc1	19.619	19.719	NO	NO	NO
RPKM_pLKO_control	Cpne5	2.66752	2.76752	NO	NO	NO
RPKM_pLKO_control	Bbs9	1.87242	1.97242	NO	Yes	NO
RPKM_pLKO_control	Mbnl2	13.5165	13.6165	NO	NO	NO
RPKM_pLKO_control	Fbxo16	0.333324	0.433324	NO	NO	NO
RPKM_pLKO_control	Pak5	0.00820128	0.108201	Yes	Yes	Yes
RPKM_pLKO_control	Rabggta	9.17559	9.27559	NO	NO	NO
RPKM_pLKO_control	Rec8	4.01415	4.11415	NO	NO	NO
RPKM_pLKO_control	Slc22a17	3.10818	3.20818	NO	NO	NO
RPKM_pLKO_control	Dzip1	3.28714	3.38714	NO	NO	NO
RPKM_pLKO_control	Morn2	3.11704	3.21704	NO	NO	NO
RPKM_pLKO_control	Erg28	11.2418	11.3418	NO	NO	NO
RPKM_pLKO_control	Stard10	4.77096	4.87096	NO	NO	NO
RPKM_pLKO_control	Zfp235	0.41695	0.51695	NO	NO	NO
RPKM_pLKO_control	Caskin1	0.60099	0.70099	NO	NO	NO
RPKM_pLKO_control	Zfp799	0.717262	0.817262	NO	NO	NO
RPKM_pLKO_control	Pidd1	6.26882	6.36882	NO	NO	NO
RPKM_pLKO_control	H2-DMa	0.997681	1.09768	NO	NO	NO
RPKM_pLKO_control	Ocln	0.507367	0.607367	NO	NO	NO
RPKM_pLKO_control	Cab39l	5.55179	5.65179	NO	NO	NO
RPKM_pLKO_control	Tmtc4	1.98415	2.08415	Yes	Yes	Yes
RPKM_pLKO_control	Ipo5	75.6836	75.7836	NO	NO	NO
RPKM_pLKO_control	Rcbtb1	7.62982	7.72982	NO	NO	NO
RPKM_pLKO_control	Rplp2	52.7824	52.8824	NO	NO	NO
RPKM_pLKO_control	Zfp788	1.09061	1.19061	NO	Yes	NO
RPKM_pLKO_control	Slc12a7	11.6768	11.7768	NO	NO	NO
RPKM_pLKO_control	Rgs14	0.738857	0.838857	NO	NO	NO
RPKM_pLKO_control	Chmp2a	26.3873	26.4873	NO	NO	NO
RPKM_pLKO_control	Elobl	0.146209	0.246209	NO	NO	NO
RPKM_pLKO_control	Ccp110	4.90417	5.00417	NO	NO	NO
RPKM_pLKO_control	Rprd1a	2.70487	2.80487	NO	NO	NO
RPKM_pLKO_control	Msc	0.862426	0.962426	NO	Yes	NO
RPKM_pLKO_control	Sbk1	7.02936	7.12936	NO	NO	NO
RPKM_pLKO_control	Sil1	3.08891	3.18891	NO	NO	NO
RPKM_pLKO_control	Pla2g2f	0.0124113	0.112411	NO	NO	NO
RPKM_pLKO_control	Zfp184	2.14148	2.24148	NO	NO	NO
RPKM_pLKO_control	Kif27	0.0525415	0.152542	NO	NO	NO
RPKM_pLKO_control	Zfp553	12.2919	12.3919	NO	NO	NO
RPKM_pLKO_control	Gpa33	16.0177	16.1177	NO	NO	NO
RPKM_pLKO_control	Arhgap26	0.358433	0.458433	NO	Yes	NO
RPKM_pLKO_control	Gm18905	0.0583234	0.158323	NO	NO	NO
RPKM_pLKO_control	Gm15246	0.347021	0.447021	NO	NO	NO
RPKM_pLKO_control	Itgae	0.196403	0.296403	NO	NO	NO
RPKM_pLKO_control	Prdm9	0.223604	0.323604	NO	NO	NO
RPKM_pLKO_control	Acan	0.15983	0.25983	NO	NO	NO
RPKM_pLKO_control	4933427D14Rik	1.43785	1.53785	NO	NO	NO
RPKM_pLKO_control	Tdrp	3.78411	3.88411	NO	NO	NO
RPKM_pLKO_control	Slain1	3.21961	3.31961	NO	Yes	NO
RPKM_pLKO_control	Hpcal1	15.5972	15.6972	NO	NO	NO
RPKM_pLKO_control	Dmac2l	1.2599	1.3599	NO	NO	NO
RPKM_pLKO_control	Tmem63c	0.131033	0.231033	NO	NO	NO
RPKM_pLKO_control	Plcd3	2.24154	2.34154	NO	NO	NO
RPKM_pLKO_control	Zfp248	0.347717	0.447717	NO	NO	NO
RPKM_pLKO_control	Tmem161b	3.19668	3.29668	Yes	Yes	Yes
RPKM_pLKO_control	Pdk2	2.30914	2.40914	NO	NO	NO
RPKM_pLKO_control	Pold2	40.0407	40.1407	NO	NO	NO
RPKM_pLKO_control	Gstp3	1.51121	1.61121	NO	NO	NO
RPKM_pLKO_control	Tigd3	0.274621	0.374621	NO	NO	NO
RPKM_pLKO_control	Fam234b	1.04088	1.14088	NO	NO	NO
RPKM_pLKO_control	Gm5165	0.950232	1.05023	NO	NO	NO
RPKM_pLKO_control	Slc22a21	0.22053	0.32053	NO	NO	NO
RPKM_pLKO_control	Atad2b	2.53304	2.63304	NO	NO	NO
RPKM_pLKO_control	Gm45871	0.495437	0.595437	NO	NO	NO
RPKM_pLKO_control	Lamtor2	27.0265	27.1265	NO	NO	NO
RPKM_pLKO_control	Tert	2.03604	2.13604	NO	NO	NO
RPKM_pLKO_control	Otop2	0.0395522	0.139552	NO	NO	NO
RPKM_pLKO_control	Ercc8	3.30204	3.40204	NO	NO	NO
RPKM_pLKO_control	Sncb	0.423255	0.523255	NO	NO	NO
RPKM_pLKO_control	Klhl3	0.117222	0.217222	NO	NO	NO
RPKM_pLKO_control	Plaat3	1.17847	1.27847	NO	NO	NO
RPKM_pLKO_control	Gm550	0.555811	0.655811	NO	NO	NO
RPKM_pLKO_control	Pigt	10.987	11.087	NO	NO	NO
RPKM_pLKO_control	Vdac1	69.9813	70.0813	NO	NO	NO
RPKM_pLKO_control	Slc22a5	0.825546	0.925546	NO	NO	NO
RPKM_pLKO_control	Slc34a3	0.192288	0.292288	NO	NO	NO
RPKM_pLKO_control	Duox2	0.0119866	0.111987	NO	NO	NO
RPKM_pLKO_control	Acot8	5.91657	6.01657	NO	NO	NO
RPKM_pLKO_control	Camkk1	0.884941	0.984941	NO	NO	NO
RPKM_pLKO_control	Dgke	2.09387	2.19387	NO	NO	NO
RPKM_pLKO_control	Uqcr10	60.8878	60.9878	NO	NO	NO
RPKM_pLKO_control	Rnf212	0	0.1	NO	NO	NO
RPKM_pLKO_control	Hmx1	0.00846206	0.108462	NO	NO	NO
RPKM_pLKO_control	Odad4	0.161687	0.261687	NO	NO	NO
RPKM_pLKO_control	Rasl10a	0.558123	0.658123	NO	NO	NO
RPKM_pLKO_control	Lyrm7	0.394111	0.494111	NO	NO	NO
RPKM_pLKO_control	Sfi1	1.36472	1.46472	NO	NO	NO
RPKM_pLKO_control	Sp6	0.985719	1.08572	NO	NO	NO
RPKM_pLKO_control	Pdgfa	17.9438	18.0438	NO	NO	NO
RPKM_pLKO_control	Tbl2	5.35426	5.45426	NO	NO	NO
RPKM_pLKO_control	Krtcap3	1.9312	2.0312	NO	NO	NO
RPKM_pLKO_control	Rnf43	0.119027	0.219027	NO	NO	NO
RPKM_pLKO_control	Hmgb2	1.75895	1.85895	NO	NO	NO
RPKM_pLKO_control	Slc35f3	0.0990826	0.199083	NO	NO	NO
RPKM_pLKO_control	Clcn1	0.114959	0.214959	NO	NO	NO
RPKM_pLKO_control	Wnt7a	0.0475331	0.147533	NO	NO	NO
RPKM_pLKO_control	Ppp1r9a	0.952125	1.05213	NO	NO	NO
RPKM_pLKO_control	Clpb	5.96331	6.06331	NO	NO	NO
RPKM_pLKO_control	Ethe1	10.2639	10.3639	NO	NO	NO
RPKM_pLKO_control	Piwil2	0.750911	0.850911	NO	NO	NO
RPKM_pLKO_control	Mlycd	1.29528	1.39528	NO	NO	NO
RPKM_pLKO_control	Acyp1	2.8368	2.9368	NO	NO	NO
RPKM_pLKO_control	Colgalt1	22.5065	22.6065	NO	NO	NO
RPKM_pLKO_control	Ppp1r3b	0.376615	0.476615	NO	NO	NO
RPKM_pLKO_control	Zfp420	0.41728	0.51728	NO	NO	NO
RPKM_pLKO_control	Arhgef15	1.40199	1.50199	NO	NO	NO
RPKM_pLKO_control	Rab44	0.05287	0.15287	NO	NO	NO
RPKM_pLKO_control	Mlc1	0.0221959	0.122196	NO	NO	NO
RPKM_pLKO_control	Gnmt	0.716701	0.816701	NO	NO	NO
RPKM_pLKO_control	Igfals	0.165239	0.265239	NO	NO	NO
RPKM_pLKO_control	Camkmt	0.681312	0.781312	NO	NO	NO
RPKM_pLKO_control	Polh	1.85562	1.95562	NO	NO	NO
RPKM_pLKO_control	Ppargc1b	0.39927	0.49927	NO	NO	NO
RPKM_pLKO_control	Lims2	1.02193	1.12193	NO	NO	NO
RPKM_pLKO_control	Calb2	0.997544	1.09754	NO	NO	NO
RPKM_pLKO_control	Glce	3.76403	3.86403	NO	NO	NO
RPKM_pLKO_control	Hmx2	0.00680636	0.106806	NO	NO	NO
RPKM_pLKO_control	Tmem59l	1.59611	1.69611	NO	NO	NO
RPKM_pLKO_control	Pex11g	0.284024	0.384024	NO	NO	NO
RPKM_pLKO_control	Nudt12	0.326181	0.426181	Yes	Yes	Yes
RPKM_pLKO_control	Cenpu	3.33719	3.43719	NO	NO	NO
RPKM_pLKO_control	Zfp958	0.773047	0.873047	NO	NO	NO
RPKM_pLKO_control	Lrrc29	0.319315	0.419315	NO	NO	NO
RPKM_pLKO_control	Polr1has	2.87563	2.97563	NO	NO	NO
RPKM_pLKO_control	Abca2	3.71846	3.81846	NO	NO	NO
RPKM_pLKO_control	Katnal2	0.274082	0.374082	NO	NO	NO
RPKM_pLKO_control	Fgf22	0.157338	0.257338	NO	NO	NO
RPKM_pLKO_control	Osr2	3.61932	3.71932	NO	NO	NO
RPKM_pLKO_control	Coro6	0.47771	0.57771	NO	NO	NO
RPKM_pLKO_control	Rbm26	9.35305	9.45305	NO	NO	NO
RPKM_pLKO_control	1700019N19Rik	0	0.1	NO	NO	NO
RPKM_pLKO_control	Pcgf5	1.17227	1.27227	NO	NO	NO
RPKM_pLKO_control	Sh2d4b	0.308187	0.408187	NO	NO	NO
RPKM_pLKO_control	H2-Q2	0.111945	0.211945	NO	NO	NO
RPKM_pLKO_control	Pax2	0.0246622	0.124662	NO	NO	NO
RPKM_pLKO_control	Arhgef38	0.0803983	0.180398	Yes	Yes	Yes
RPKM_pLKO_control	Arhgef4	0.514368	0.614368	NO	NO	NO
RPKM_pLKO_control	Dlec1	0.082052	0.182052	NO	NO	NO
RPKM_pLKO_control	Piwil4	0.197544	0.297544	NO	NO	NO
RPKM_pLKO_control	Prdm11	0.174233	0.274233	NO	NO	NO
RPKM_pLKO_control	Grtp1	6.77686	6.87686	NO	NO	NO
RPKM_pLKO_control	Dab1	1.12734	1.22734	Yes	Yes	Yes
RPKM_pLKO_control	Ermap	0.0133626	0.113363	NO	NO	NO
RPKM_pLKO_control	Pnisr	11.3385	11.4385	NO	NO	NO
RPKM_pLKO_control	Smim41	0.00535062	0.105351	NO	NO	NO
RPKM_pLKO_control	Tor2a	11.7944	11.8944	NO	NO	NO
RPKM_pLKO_control	Trim62	1.14598	1.24598	NO	NO	NO
RPKM_pLKO_control	3110040N11Rik	3.64697	3.74697	NO	NO	NO
RPKM_pLKO_control	Ankrd65	0.0146229	0.114623	NO	NO	NO
RPKM_pLKO_control	Tle7	0.0574488	0.157449	NO	NO	NO
RPKM_pLKO_control	Shoc1	0.0205595	0.120559	NO	NO	NO
RPKM_pLKO_control	Iqcn	0.0807662	0.180766	NO	NO	NO
RPKM_pLKO_control	Gm38999	0.205593	0.305593	NO	NO	NO
RPKM_pLKO_control	Gm36210	0.244313	0.344313	NO	NO	NO
RPKM_pLKO_control	Lsmem2	0.59182	0.69182	NO	NO	NO
RPKM_pLKO_control	Gm28729	0.0363709	0.136371	NO	NO	NO
RPKM_pLKO_control	Ccdc188	0.0204332	0.120433	NO	NO	NO
RPKM_pLKO_control	Gm29776	0.018254	0.118254	NO	NO	NO
RPKM_pLKO_control	Rnf212b	0.152801	0.252801	NO	NO	NO
RPKM_pLKO_control	Hmcn2	0.126843	0.226843	NO	NO	NO
RPKM_pLKO_control	Gm36718	0.115185	0.215185	NO	NO	NO
RPKM_pLKO_control	Efcab8	0.100583	0.200583	NO	NO	NO
RPKM_pLKO_control	Gm13420	0.114346	0.214346	NO	NO	NO
RPKM_pLKO_control	Ankrd31	0.130453	0.230453	NO	NO	NO
RPKM_pLKO_control	Zscan30	0.596342	0.696342	NO	NO	NO
RPKM_pLKO_control	Sptbn5	0.067029	0.167029	NO	NO	NO
RPKM_pLKO_control	Emid1	0.424321	0.524321	NO	NO	NO
RPKM_pLKO_control	Trpv3	0.0230556	0.123056	NO	NO	NO
RPKM_pLKO_control	Ly6g6d	0.407254	0.507254	NO	NO	NO
RPKM_pLKO_control	Gm21818	0.0341343	0.134134	NO	NO	NO
RPKM_pLKO_control	Pzp	0.0415901	0.14159	NO	NO	NO
RPKM_pLKO_control	Abca4	0.0321585	0.132158	NO	NO	NO
RPKM_pLKO_control	Acads	10.6266	10.7266	NO	NO	NO
RPKM_pLKO_control	Acvr1b	4.02173	4.12173	NO	NO	NO
RPKM_pLKO_control	Gpr182	0.0827174	0.182717	NO	NO	NO
RPKM_pLKO_control	Adra2c	0.0128839	0.112884	NO	NO	NO
RPKM_pLKO_control	Adrb1	0.113272	0.213272	NO	NO	NO
RPKM_pLKO_control	Adrb2	1.08973	1.18973	NO	Yes	NO
RPKM_pLKO_control	Adssl1	5.32395	5.42395	NO	NO	NO
RPKM_pLKO_control	Nr0b1	37.4622	37.5622	Yes	Yes	Yes
RPKM_pLKO_control	Akp3	0.00411262	0.104113	NO	NO	NO
RPKM_pLKO_control	Alppl2	0.00469883	0.104699	NO	NO	NO
RPKM_pLKO_control	Amh	0.332869	0.432869	NO	NO	NO
RPKM_pLKO_control	Aplp1	27.4181	27.5181	NO	NO	NO
RPKM_pLKO_control	Aqp7	0.0242202	0.12422	NO	NO	NO
RPKM_pLKO_control	Ass1	21.1128	21.2128	NO	NO	NO
RPKM_pLKO_control	Atp2a1	0.0920384	0.192038	NO	NO	NO
RPKM_pLKO_control	Atp7b	0.40191	0.50191	NO	NO	NO
RPKM_pLKO_control	Bard1	2.86241	2.96241	NO	NO	NO
RPKM_pLKO_control	Barx1	0.210127	0.310127	NO	NO	NO
RPKM_pLKO_control	Opn1sw	0.0632288	0.163229	NO	NO	NO
RPKM_pLKO_control	Hrk	0.0641365	0.164136	NO	NO	NO
RPKM_pLKO_control	Bik	0.626407	0.726407	NO	NO	NO
RPKM_pLKO_control	Bmp6	0.485553	0.585553	NO	NO	NO
RPKM_pLKO_control	Bmp7	0.526056	0.626056	NO	NO	NO
RPKM_pLKO_control	Bmp8b	1.28475	1.38475	NO	NO	NO
RPKM_pLKO_control	Car8	0.0995103	0.19951	NO	NO	NO
RPKM_pLKO_control	Car4	3.43849	3.53849	NO	NO	NO
RPKM_pLKO_control	Car5a	0.0248627	0.124863	NO	NO	NO
RPKM_pLKO_control	Cckbr	0.0314167	0.131417	NO	NO	NO
RPKM_pLKO_control	Ccnb2	27.2079	27.3079	NO	NO	NO
RPKM_pLKO_control	Ccnf	38.0337	38.1337	NO	NO	NO
RPKM_pLKO_control	Cd3e	0.18353	0.28353	NO	NO	NO
RPKM_pLKO_control	Cd79a	0.335715	0.435715	NO	NO	NO
RPKM_pLKO_control	Cd9	58.6162	58.7162	NO	NO	NO
RPKM_pLKO_control	Cdk1	11.8404	11.9404	NO	NO	NO
RPKM_pLKO_control	Cdh15	0.115075	0.215075	NO	NO	NO
RPKM_pLKO_control	Cdh6	0.0834814	0.183481	Yes	Yes	Yes
RPKM_pLKO_control	Chek1	6.80656	6.90656	Yes	NO	NO
RPKM_pLKO_control	Chga	3.16666	3.26666	NO	NO	NO
RPKM_pLKO_control	Ovgp1	0.259464	0.359464	NO	NO	NO
RPKM_pLKO_control	Chrm4	0.616414	0.716414	NO	NO	NO
RPKM_pLKO_control	Cidea	0.149357	0.249357	NO	NO	NO
RPKM_pLKO_control	Ckm	0.0714171	0.171417	NO	NO	NO
RPKM_pLKO_control	Clcn3	5.5315	5.6315	NO	NO	NO
RPKM_pLKO_control	Col9a2	1.20856	1.30856	NO	NO	NO
RPKM_pLKO_control	Cort	0.273121	0.373121	NO	NO	NO
RPKM_pLKO_control	Cox5a	89.1743	89.2743	NO	NO	NO
RPKM_pLKO_control	Cox6a1	117.023	117.123	NO	NO	NO
RPKM_pLKO_control	Cox8a	186.814	186.914	NO	NO	NO
RPKM_pLKO_control	Cplx1	0.363746	0.463746	NO	NO	NO
RPKM_pLKO_control	Cpox	5.56668	5.66668	NO	NO	NO
RPKM_pLKO_control	Cryga	0.263377	0.363377	NO	NO	NO
RPKM_pLKO_control	Cyp26a1	0.384516	0.484516	NO	NO	NO
RPKM_pLKO_control	Dcc	0.0195505	0.119551	Yes	Yes	Yes
RPKM_pLKO_control	Dhcr7	8.84225	8.94225	NO	NO	NO
RPKM_pLKO_control	Dhh	0.0669771	0.166977	NO	NO	NO
RPKM_pLKO_control	Dffb	1.83444	1.93444	NO	NO	NO
RPKM_pLKO_control	Mpp3	0.261641	0.361641	NO	NO	NO
RPKM_pLKO_control	Dlx4	0.099386	0.199386	NO	NO	NO
RPKM_pLKO_control	Drd4	0.0473363	0.147336	NO	NO	NO
[truncated: 14,174 more rows]

## Sheet: Extended Data Fig.6c
Extended Data Fig.6c: Overlap of genes upregulated in Lmna-/- mESCs with genes upregulated in CTH OE or CBS OE mESCs. Log2 fold change ≥ 0.58; p-adjusted value <0.05
Genes upregulated in shCtrl Lmna-/- vs shCtrl Control	Genes upregulated in CTH OE vs. shCtrl WT	Genes upregulated in CBS OE vs. shCtrl WT
Zfp85	Fbxo41	Fbxo41
Fbxo41	Taf9b	Zfp456
Taf9b	Primpol	Slc35d2
Primpol	Zfp456	Plekha8
Zfp456	Thnsl1	Usp17ld
Thnsl1	Slc35d2	Prss48
Slc35d2	Plekha8	Rtel1
Plekha8	Ttyh1	Nol4l
Usp17ld	Sohlh1	Zfp948
Prss48	Nol4l	Kcnq2
Sohlh1	Panx2	Masp2
Mpzl1	Tdrd1	Kdm2b
Limch1	Pram1	Zfp619
Nol4l	Kcnq2	Slc13a5
Panx2	Mars1	AU018091
Hspa2	Senp7	9930012K11Rik
Tdrd1	Zfp619	Sgpp2
Pram1	Ckap2	Slc28a1
Zfp457	Slc13a5	Rexo5
Kcnq2	AU018091	Zfp560
Masp2	9930012K11Rik	Cntnap2
Senp7	Scarf1	Pla2g4c
Zfp619	Celsr2	Ypel2
Ckap2	Whamm	Mreg
Slc13a5	Rexo5	Zcwpw1
AU018091	Zfp560	Rsrc2
9930012K11Rik	Amigo1	Itgb4
Scarf1	Gprasp1	Zfp69
Sgpp2	Asap2	Phactr3
Whamm	Scube3	Slc7a6os
Rexo5	Tacc2	Maneal
Zfp560	Pla2g4c	Btbd8
Amigo1	Ypel2	Pramel20
Cntnap2	Sp9	Cdsn
Scube3	Ppp1r26	Zfp975
Tacc2	Mreg	Zfp760
Pla2g4c	Zcwpw1	Adora1
Ypel2	Rsrc2	Whrn
Sp9	Itgb4	Naaladl1
Mreg	Zfp69	Slc38a8
Ajm1	Phactr3	Cep44
Zcwpw1	Adam22	Mdc1
Syne2	Zdhhc23	Hrh2
Rsrc2	Rffl	Birc5
Itgb4	Slc25a42	Mdk
Zfp69	Btbd8	Nrp
Mtus1	Tceanc	Tmprss13
Phactr3	Rtn1	Arhgef39
Adam22	Zfp975	Rsad1
Zdhhc23	Zfp760	Ric8b
Rffl	Whrn	Trim6
Slc25a42	Naaladl1	Zfp57
Trpv5	Unc13d	Zscan4c
Btbd8	Slc38a8	Capn11
Tceanc	Cep44	Ccdc92b
Pramel20	Mdc1	Fam169b
Dync2i2	Xkr7	Eif1ad7
Zfp760	Birc5	Zfp985
Adora1	Mdk	Espl1
Whrn	Hs3st6	Zfyve28
Naaladl1	Acd	E130308A19Rik
Unc13d	Smim19	Cox17
Txnip	Zfp787	Kbtbd7
Slc38a8	Odf3b	Nxf3
Mdc1	Tmem263	Pla2g4f
Slc10a5	Ctc1	Zfp873
Ppp1r13l	Npcd	Carmil3
Gpr12	Nrp	Mctp2
Hrh2	Arhgef39	Apol7b
Olfr543	Uspl1	Rhox10
Zfp708	Grm4	Timm9
Hs3st6	Rasl10b	Septin10
Acd	Ercc6l2	Zfp563
Adcy5	Ddn	Arl14ep
Odf3b	Zfp57	Zfp78
Ctc1	Tmem151b	Orc2
Npcd	Lingo3	Dmbx1
Sesn1	Capn11	Unc13a
Nrp	Ccdc92b	Lonrf2
Arhgef39	Zscan26	Zswim5
Zfp930	Dupd1	Trim38
Grm4	Adgrf3	Kcp
Rasl10b	Zmynd12	Pecam1
Scn4b	Espl1	Rnf17
Tcaim	Zfyve28	Ntrk1
Inip	Rap1gap2	Commd6
Ddn	E130308A19Rik	Ecscr
Zfp57	Zdhhc18	Selenoh
Tmem151b	Izumo1	Naa11
Lingo3	Trim15	AU015228
Zscan4c	Kbtbd7	Pls1
Capn11	Gpr139	Ezhip
Aim2	Fbxo10	Cln5
Ccdc92b	Pla2g4f	Fancd2
Eif1ad7	Bcat1	Pak6
Adgrf3	Rabl6	Stox1
Zmynd12	Zfp873	Agap2
Espl1	Carmil3	Gls2
Zfyve28	Lrp3	Gm525
Rap1gap2	Rhox10	Cryzl2
Arid3c	Septin10	Sbspon
Zdhhc18	N4bp2	Zfp217
Izumo1	Rbfox3	Myrfl
Trim15	Zfp563	Abcc4
Kbtbd7	Pbx4	Rimbp3
Adamts15	Arl14ep	D430041D05Rik
Pla2g4f	Trp53i11	Iqsec3
Bcat1	Sox6	Zfp568
Pdp2	Dmbx1	Pgr15l
Rabl6	Unc13a	Mucl3
Carmil3	Nova2	Treml2
C1ql4	Lonrf2	Rbm44
Mctp2	Zswim5	Rnf224
Apol7b	Kcp	Ceacam16
Rhox10	Pecam1	Trim75
Timm9	Lrrc14b	Arl14epl
Septin10	Rnf17	Accsl
Trp53i13	Ntrk1	Cracr2a
Pitpnm3	Bbs1	Bclaf3
Rbfox3	Commd6	Iqgap3
Zfp563	Rmdn3	Mfsd2b
Pbx4	Shcbp1l	Mageb4
Arl14ep	2510002D24Rik	Bex6
Cxadr	Cln6	Slc47a2
Trp53i11	Tmem181a	Acsl6
Tas2r137	Skap1	Prex2
Dmbx1	C77080	Crxos
Kcnj6	Pls1	Pramel17
Npnt	Ezhip	Ubtfl1
Pknox2	Ttc7b	Adamts17
Unc13a	AU021092	Thnsl2
Nova2	Trim40	Calca
Lonrf2	Cln5	7420426K07Rik
Sec14l3	Fancd2	Tnfsfm13
Kcp	Zfp583	Pramel31
Fat2	Lemd1	Tdpoz8
Dkc1	Pak6	Tlcd5
Pecam1	Spata5l1	Mrgprx2
Klhdc9	Phactr2	Ldc1
Lrrc14b	Arfgef3	Dnai2
Rnf17	Mcu	Kbtbd6
Ntrk1	Zfc3h1	Zfp936
Bbs1	Agap2	Tmem92
Commd6	Gls2	Zfp345
Ecscr	Slc4a7	Mansc4
1700029J07Rik	Cryzl2	Golm1
Tradd	Slc30a10	Setd6
Shcbp1l	Sbspon	Atp2b2
Ephx3	Ciart	Xaf1
2510002D24Rik	Cox18	Strip2
1700066B19Rik	Vsig10	Timm8a2
Cln6	Ccdc61	Ripply1
Tmem181a	Myrfl	BC147527
Skap1	Abcc4	Wdr93
C77080	Cdc42bpg	Deptor
Naa11	Sec31b	Cldn19
AU015228	D430041D05Rik	Mapt
Myzap	Zfp568	Ric3
Pls1	Ntn5	Stk35
Ezhip	Dcp1b	Zfp953
Rprml	Treml2	Elavl4
Ttc7b	Rbm44	Tmod2
Slc45a4	Lgr6	Klk13
Calr4	Rnf224	Trim63
Slc5a10	Ceacam16	Cox8c
Trim40	Tmem102	Prkcz
Fancd2	Lrch1	Mrpl1
Cfap44	Cdkl4	Trpm1
Zfp583	Garem1	Hnrnpa1
Plekhg1	Drc1	Npr3
Pak6	Spef1l	Ceacam1
Spata5l1	Bclaf3	Rreb1
Mcu	Iqgap3	Zfp982
Stox1	BC048644	Zfp951
Agap2	Mfsd2b	Zfp808
Gls2	Mageb4	Kcnj10
Gm525	AW554918	Catsperz
Qrich2	Tnfaip8l3	Gtf2a2
Slc4a7	Pgap3	Pigl
Brd1	Slc47a2	Myo6
Prdm6	Acsl6	Rad54b
Cryzl2	Dnah1	Glyctk
Slc30a10	Tmem253	Gm20767
Sbspon	Smagp	Tesmin
Smim26	Ak8	Mks1
Fhdc1	Adamts17	Sco1
Ampd1	Thnsl2	Tet2
Ndufb6	Calca	Tacc3
Cox18	Asic2	Clmn
Vsig10	Limk2	Rspo4
Ccdc61	Pramel31	Kntc1
Tmem231	Shank1	Arrdc4
Myrfl	Tlcd5	Cd74
Syndig1l	Pnldc1	Nusap1
Abcc4	Dnai2	Oip5
Ttc38	Zfp936	Fzd5
Cdc42bpg	Zfr2	Pcdh8
Sec31b	Tmem92	Slc22a18
D430041D05Rik	Mansc4	Rad17
Iqsec3	Golm1	Zfp2
Zfp568	Setd6	Mef2b
Ntn5	Atp2b2	Prss38
Pgr15l	Agap1	Ccnjl
Cdhr2	Prok2	Tulp2
Treml2	Kcnh6	Lyrm9
Rbm44	Xaf1	Gsta3
Lgr6	Arhgef10	Scn8a
Rnf224	Arnt	Tsks
Ceacam16	Strip2	Lrba
Tmem211	Gpx4	Sdhaf3
Trim75	Timm8a2	Hnrnph3
Nlrp12	Btrc	Brdt
Cdkl4	Sgk3	Gsg1
Arl14epl	Wdr93	Ret
Accsl	Deptor	Cps1
Spef1l	Dusp22	Rbpj
Foxr1	Cldn19	Tead4
Bclaf3	Marveld2	Brca2
Iqgap3	Mapt	Etl4
BC048644	Ric3	Cacna1s
Mfsd2b	Stk35	Cfap91
Mageb4	Gng2	Dock9
Gramd2	Tmod2	Pdzd2
Klhl32	Rnf38	Zfp707
Tnfaip8l3	Atp8a1	Dennd3
Pgap3	Kif5a	Cubn
Bex6	Klk13	Lrp2
Slc47a2	Trim63	Gpat2
Dnaaf3	Ldb3	Grik3
Acsl6	Prkcz	Aunip
Crxos	Trpm1	Chrna9
Dnah1	Npr3	Ankrd26
Trim80	Rreb1	Nccrp1
Pramel17	Aifm2	Gli2
Ubtfl1	Zfhx2	Adamts14
Zfp551	Zfp808	Cntnap3
Ak8	Kcnd3	Ogdhl
Adamts17	Kif21b	Dhtkd1
Thnsl2	Kcnj10	Kcng1
Calca	Catsperz	Prrg3
Cibar2	Wfdc10	Ankrd35
7420426K07Rik	Pnkd	Kcnq4
Ncoa4	Pigl	Cyp2b23
Limk2	Myo6	Mdga1
Pramel31	Rad54b	Aspg
Armc2	Mroh8	Polr3g
Erich1	Glyctk	Adgrf5
Tlcd5	Tesmin	Focad
Mrgprx2	Mks1	Eml5
Bpifb4	Arhgap12	Crnn
Ccdc24	Zfp606	Prdm14
Dnai2	Sco1	Myo1a
Kbtbd6	Tet2	Tln2
Pnpla1	Flot2	Myh13
Zfr2	Clmn	Alg6
Tmem92	Zfp692	Dscaml1
Ms4a15	Rspo4	Tbc1d4
Mansc4	Uevld	Ibtk
Defb42	Kntc1	Prr19
Golm1	Blm	Arhgef26
Setd6	Arrdc4	C2cd4b
Atp2b2	Hbs1l	Myo5c
Nfatc2	Nusap1	Zkscan2
Slc41a3	Oip5	Dnah2
Prok2	Fzd5	Dgkh
Cgn	Smad7	Adgrd1
Arhgef10	Rbpms	Cystm1
Strip2	Ilf3	Chd5
Timm8a2	Ankdd1b	Kmt2c
Zfp791	Pcdh8	Ctcfl
Slc22a14	Slc22a18	Tbc1d31
Zdhhc12	Sema3b	Adamts3
Cd6	Zfp2	Plb1
BC147527	Zfp41	Agmat
Wdr93	Mef2b	Unc13b
Gm11992	Mfge8	Fndc1
Deptor	Akna	Galnt16
Dusp22	Proca1	Fam184a
Banf1	Fam83b	Ccdc15
Arsi	Prss38	Nasp
Cldn19	Cep126	Camta1
Marveld2	Hsf5	Ccnd3
Mapt	Ccnjl	Rgs3
Olfm1	Tulp2	Fam90a1a
Ric3	Ttc21b	Tomt
Gng2	Lyrm9	Dnmt3l
Gng7	Scn8a	Dux
Faim2	Tsks	Clasp2
Tmod2	Lrba	Rnf144a
P2rx7	Shprh	Sh3d19
Atp8a1	Srsf5	Pigyl
Kif5a	Hnrnph3	Spint2
Klk13	Brdt	Sdr39u1
Trim63	Med1	Lig1
Cox8c	Uhrf1bp1	Pars2
Ldb3	Ret	Liph
Prkcz	Ash2l	Slc12a8
Trpm1	Cdc14a	Fetub
Ddhd1	Rapgefl1	Nr3c2
Asb1	Sp2	Zfp991
Aifm2	Tead4	Myh7b
Zfhx2	Ddias	Pramel24
Kcnd3	Brca2	Cisd3
Mtcp1	Etl4	Zbtb34
Kif21b	Cacna1s	Myom3
Kcnj10	Kcnt2	Fam131c
Catsperz	Tmem243	Myorg
Wfdc10	Pde11a	Pramel19
Pnkd	Srgap1	Zfp992
Gtf2a2	Dock9	Slc2a7
Pstk	Slc25a18	Tmem235
Mlf1	Nhs	Pramel30
Myo6	Tecpr2	Tcp11
Rad54b	Pdzd2	Kif26a
Mroh8	Zfp707	Nr1i2
Glyctk	Dennd3	Ndufa4l2
Gm20767	Rgs11	Tox2
Lhx3	Sapcd2	Pik3c2b
Tesmin	Gpat2	Duox1
Mks1	Cep152	Ajap1
Arhgap12	Grik3	Shisal2a
Sco1	Aunip	Ctag2l1
Tmem141	Morn1	Myh3
Larp1b	Ankrd26	Zscan4d
Tet2	Nccrp1	Bicral
Flot2	Mki67	Pnma5
Clmn	Gli2	Susd5
Zfp692	Adamts14	Tmem233
Rspo4	Cntnap3	Cyp4f40
Uevld	Ogdhl	Isoc2a
Mtmr7	Dhtkd1	Calml4
BC051019	Kcng1	Cnnm2
Kntc1	Prrg3	Alkbh1
Cacna1b	Ankrd35	Col6a6
Akap1	Kcnq4	Kif19a
Apaf1	Marf1	Zfp980
Arrdc4	Rap1gap	Lin9
Cd74	Mdga1	Tmc5
Sstr2	Phf21b	Gm11545
Htra3	Aspg	Zfp185
Nusap1	Lama5	Aqp8
Smad7	Frmpd1	Bach2
Ankdd1b	Kif13b	C2cd5
Drc7	Focad	Cenpw
Pcdh8	Eml5	Trpc2
Slc22a18	Hcn4	Apoc1
Sema3b	Prdm14	Dzip3
Zfp2	Myo1a	Ppih
Gcdh	Gpr179	Cdca2
Rbak	Ercc6	Lnpk
Mapk1ip1	Palb2	Ttk
Mef2b	Tln2	Zscan4f
Mfge8	Myh13	Efcab12
Proca1	Fbxo43	Pclo
Fam83b	Kdm3b	Foxp4
Prss38	Alg6	Crem
Hsf5	Dscaml1	Cdc25b
Ccnjl	Tbc1d4	Uhrf1
Tulp2	Tmem28	Rad51ap2
Zfp952	Mpp7	Ccnb1ip1
Snrpa	Fam217b	Ubap1l
Agbl5	Prr19	Kcnip3
Lyrm9	C2cd4b	Aldh3a1
Plin5	Myo5c	Nemp1
Scn8a	Mphosph9	Xkr5
Tsks	Zkscan2	Boll
Ccdc173	Dnah2	Lifr
Lrba	Slc9a5	Frrs1
Sdhaf3	Plekhg4	Itga9
Hnrnph3	Cul9	Ltbp4
Brdt	Dgkh	Glo1
Trim72	Sipa1l2	Cutc
Vamp1	L3mbtl1	Mtcl1
Ret	Scaper	Fam189a2
Rapgefl1	Adgrd1	Nedd4l
Lrp8	Chd2	Jmjd7
Tubb1	Lrrc7	Mfsd4a
Tead4	Cenpf	Tasor
Ddias	Cystm1	Kmt5c
Brca2	Vps8	H2-M5
Cacna1s	Chd5	Zbtb44
Cfap91	Kmt2c	Eif1ad3
Tmem243	Ctcfl	Kit
Pde11a	Tbc1d31	Faim
Dock9	Prss33	Lepr
Cnksr1	Plb1	Rad54l
Slc25a18	Unc13b	Cdc14b
Nhs	Galnt16	B3galt5
Tecpr2	Rbm24	Eif4a2
Slc9a3	Fam184a	Pnp2
Zfp707	Ccdc15	Fam178b
Dennd3	Ino80d	Pramel16
Rgs11	Wdr86	Pramel21
Lct	Ncam1	Mroh7
Cubn	Ppp2r5c	Zfp534
Lrp2	Mettl7a3	Sirt3
Gpat2	Camta1	Meioc
Cep152	Ccnd3	Tspan32
Saxo1	Rgs3	Opn4
Grik3	Neurl1b	Tm9sf5
Morn1	Klhl34	Hpca
Cd8a	Zfp800	Pttg1
Ankrd26	Tomt	Gpr160
Nccrp1	Gnb1l	Megf11
Jhy	Clasp2	Prr23a1
Adamts14	Rnf144a	Iho1
Ogdhl	Sh3d19	Cntfr
Dhtkd1	Pigyl	Poli
Upf2	Spint2	Rbl1
Kcng1	Sdr39u1	Tpx2
Prrg3	Ptpru	Gm14124
Ankrd35	Lig1	Nemp2
Kcnq4	Mboat2	Eif4a3l1
Lonrf1	Disp3	Zfp949
Npat	Pars2	Syce1
Marf1	Slc12a8	Ppfia4
Rap1gap	Fetub	Gm13889
Mdga1	Nr3c2	Btbd18
Slc4a11	Kdf1	Sult6b2
Sap30l	Oas1b	Kcnt1
Aspg	Tle3	Mak
Lama5	Myh7b	Nucks1
Frmpd1	Cisd3	Lrp4
Heatr5b	Ppp1r3d	Gm14139
Focad	Zbtb34	Ddx4
Eml5	Tmem8b	Nat8f4
Hcn4	Myom3	Pianp
Zfp174	Fam131c	Ttc39a
Myo1a	Myorg	Ndrg2
Gpr179	Slc2a7	Als2cl
Ercc6	Tmem235	Mtss1
Stum	Tcp11	Msh5
Pigg	Dennd2d	Clcnka
Palb2	Kif26a	Eng
Tln2	Zbtb3	Ezh2
Fbxo43	Ndufa4l2	Cacnb1
Fam186b	Tox2	Grid2ip
Alg6	Pik3c2b	Ube2v2
Dscaml1	Zfp541	Polq
Doxl1	Arhgap44	Gjc1
Tbc1d4	Duox1	B3gnt5
Fam217b	Ajap1	Esrrb
Prr19	Shisal2a	Tnfsf13
Tmem236	Tmem35b	Grip2
C2cd4b	Zkscan16	Dpp4
Myo5c	Rnf39	Sirt1
Zkscan2	D3Ertd751e	Lrrc57
Dnah2	Bicral	Ppp1r16b
Slc9a5	Pnma5	Hopx
Plekhg4	Prrt4	Als2
Cul9	Akap5	Smyd1
Dgkh	Zfp267	Plekha6
L3mbtl1	Clec2l	Nfasc
Adgrd1	Susd5	Grm2
Lrrc7	Gpr25	Triml2
Cystm1	Tmem233	Timd2
Chd5	Isoc2a	Nxt2
Ctcfl	Calml4	Dctd
Tbc1d31	Cnnm2	Islr2
Prss33	Alkbh1	Cdc45
Lrr1	Col6a6	Tgm1
Plb1	Kif19a	Tfeb
Agmat	Ablim1	Gm15455
Unc13b	Brwd1	Cblc
Fndc1	Lin9	Taf7l2
Galnt16	Gm11545	Mgat4c
Chrna10	Zfp185	Cysltr2
Rbm24	Bach2	1700012B07Rik
Fam184a	Kazn	Fam174b
Ccdc15	C2cd5	9330159F19Rik
Fbxo47	Cenpw	Stk32c
Ino80d	Bcan	Nsmce4a
Wdr86	Cbfa2t3	Syce3
Plcd4	Trpc2	Gm3604
Ppp2r5c	Rnft2	Susd2
Sh2b1	Mdfi	Pkp3
Mettl7a3	Apoc1	Rmi2
Camta1	Dzip3	Rpl10l
Ccnd3	Banp	Ccdc138
Rgs3	Cdca2	Crybg2
Neurl1b	Inpp5d	Megf6
Klhl34	Yif1b	Gprasp2
Fam43b	Lnpk	Adgre5
Zfp800	Hpn	Tchh
Tomt	Zfp945	Elf3
Zfp72	Ttk	Plekhb1
Gnb1l	Zfp426	Otud6a
Tmprss9	Zscan4f	Fgfr3
Dux	Dmtf1	Birc7
Apol8	Amy1	Lpar5
Ankrd63	Ebf4	Susd1
Rnf144a	Adam11	Coq8a
Sh3d19	Pclo	Atp2a3
Efr3b	Foxp4	Fignl1
Pigyl	Serac1	4930579F01Rik
Spint2	Zfp661	Pradc1
Sdr39u1	Reps1	Mttp
Ptpru	Cdc25b	Rhpn1
Lhx6	Ubap1l	Rabggtb
Mboat2	Wdfy1	Arhgap19
Disp3	Kcnip3	S100a14
Ttll9	Tlk2	Senp3
Pars2	Arhgef16	Lrrcc1
Slc12a8	Bub1	Plxdc1
Fetub	Nemp1	Psma8
Nr3c2	Odf2	Tars2
Kdf1	Xkr5	Sult6b1
Scn3b	Phf8	Satb1
Rbck1	Boll	Chn2
Tle3	Fggy	Rpap1
Myh7b	Frrs1	Fbxo27
Steap3	Ltbp4	Dnaaf4
Pramel24	Stat5b	Pde9a
Ndufaf6	Mtcl1	Tcf19
Cisd3	Syt3	Wdr90
Ppp1r3d	Fam189a2	Pabpc6
Zbtb34	Eml4	Rpl3l
Tmem8b	Nedd4l	Zfp605
Myom3	Jmjd7	Homer2
Fam131c	Mfsd4a	Pias2
Myorg	Fnbp1l	Rerg
Pramel19	Lin54	Rpa1
Slc2a7	Kmt5c	Phf11c
Tmem235	H2-M5	Ska1
Tcp11	Zbtb44	Erlin1
Mpzl3	Fcgbp	Cep55
Dennd2d	Kit	Bcas1
Kif26a	Eps15l1	Mical1
Zbtb3	Fyn	Ankrd33b
Ndufa4l2	Lepr	Dpys
Tox2	Pla2g5	Akap11
Pik3c2b	Ccnc	Rnf165
Arhgap44	Cdc14b	Ildr2
Duox1	Eif4a2	Dap3
Ajap1	Fam178b	Pdzk1ip1
Shisal2a	Trp73	Egfl7
Tmem35b	Mroh7	Vill
Zkscan16	Sirt3	Zfp961
Sh2d5	Ccn6	Zfp809
Rnf39	Meioc	Arhgap8
Myh3	Sec14l5	Trank1
Pnmal2	Tspan32	Dnah6
Fbxo39	Opn4	Zfp229
Dnajc28	Tm9sf5	Mpp4
Zscan4d	Lpin1	Hspb2
Otof	Hdac6	Bend4
Bicral	Hpca	Slc52a3
Pnma5	Rpl35a	P2rx2
Mkrn2os	Gfap	Majin
Prrt4	Gpr160	Rgs9
Akap5	Megf11	Nsun6
Zfp267	Nxpe3	Tmem215
Pabpc4l	Prr23a1	Slc4a5
Mrap2	Iho1	Mgll
Fam71f2	Ly6h	Cspg5
Clec2l	Cntfr	Ccdc33
Susd5	Cpne6	Fam122b
Gpr25	Dpp6	Spock1
Tmem233	Poli	Fmr1nb
Isoc2a	Rtkn	Spata31d1b
Calml4	Gcnt1	Gpr19
Cnnm2	Rbl1	Rad18
Alkbh1	Tpx2	Wipf3
Col6a6	Zfp937	Nrg2
Kif19a	Fbrsl1	Col6a5
Zglp1	Nemp2	Zyg11a
Myo15	Lrrc9	1110032F04Rik
Ablim1	Atat1	Tex11
Vmn2r90	Zfp949	Rmi1
Gm11545	Nars	Mtbp
Zfp185	Tent5c	Ccdc125
Aqp8	Syce1	Sarm1
Bach2	Fam13c	Kcns3
Kazn	Insyn2a	Fam114a2
C2cd5	Ppfia4	Tspan8
Cenpw	Vwa5b2	Cd163
Bcan	Gm13889	Elmod2
Cbfa2t3	Btbd18	Rbm20
Trpc2	Kcnt1	Dtwd2
Rnft2	Lrrc74b	Bdh2
Mdfi	Mak	Senp8
Nos1ap	Lrp4	Kdm4c
Apoc1	Adtrp	Olfr376
Banp	Zfp212	Fxyd4
Ppih	Ddx4	Rlbp1
Cdca2	Gse1	Thpo
Inpp5d	Cdin1	Cacna2d2
Yif1b	Pianp	Camk2b
Lnpk	Zfp691	Map3k9
Hmbs	Tenm3	Klk11
Hpn	Ttc39a	Mymx
Ttk	Ndrg2	Plekhd1
Abhd14a	Dlgap2	Zkscan7
Zscan4f	Fam98c	Zfp600
Gprc5c	Als2cl	Eif1ad8
Tmem87a	Mtss1	Slc25a13
Adam11	Msh5	Eif1ad4
Pclo	Cables1	Slc5a6
Dnpep	Clcnka	Ect2
Serac1	Rbm46	Ablim2
Zfp661	Eng	Rapgef3
Cdc25b	Cacnb1	Otub2
Sprtn	Grid2ip	Igsf5
Lrrc73	Gtpbp8	Tfdp2
Ubap1l	Casz1	Rhox13
Wdfy1	Ube2v2	Zscan4b
Ngef	Polq	Pfdn6
Kcnip3	Gjc1	Tmem132b
Chrm1	Upp1	Ddc
Aldh3a1	B3gnt5	Dcaf12l1
Arhgef16	Mcf2l	Ddx19b
Bub1	Rbp4	Kat2b
Naca	Ppm1b	Ndfip2
Nemp1	Esrrb	Dync1i1
Odf2	Tnfsf13	Ddx43
Plch2	Grip2	Tmc8
Boll	Macroh2a1	Nek10
Ppara	Qk	Gm3336
Frrs1	Shd	Fsd1l
Col2a1	Dpp4	Srsf7
Isg20	Lnx1	Dclk2
Ltbp4	Sirt1	Tpbgl
Cutc	Pum1	Arhgap32
Stat5b	Lrrc57	Rgs22
Mtcl1	Slc44a1	Frem1
Syt3	Prrc2b	Spc25
Fam189a2	Araf	Slc38a3
Cdhr5	Crybb3	Tex14
Ccpg1	Proser2	Cacng5
Nedd4l	Ppp1r16b	Zfp94
Jmjd7	Rab17	Pnck
Mfsd4a	Nr5a2	Magec2
Kmt5c	Als2	1700013H16Rik
Tssc4	Ralgps2	Cyp4f14
Zbtb44	Gjb3	Gm11544
Phlpp2	Blzf1	Kat6b
Fcgbp	Plekha6	Tmem39a
Eif1ad3	Nfasc	Shisa8
Nectin4	Svip	Fignl2
Bdh1	Rnf152	Slc37a1
Kit	Ccdc112	Cep57l1
2310022A10Rik	Gstm4	Zfp981
Pnpla6	Triml2	Zfp383
Klhl26	Sh3bp5l	Trim34b
Lepr	Nxt2	Ggnbp1
Pla2g5	Islr2	Cacna1a
Cdc14b	Cdc45	Rpl31
B3galt5	Tgm1	Shmt2
Eif4a2	Tfeb	Pan2
Fam178b	Palm	Mybpc1
Pramel16	Fmo5	D16Ertd472e
Pramel21	Cblc	Pou5f1
Trp73	Fbxo44	Cmtm7
Mroh7	Taf7l2	D430019H16Rik
Acrbp	Miga1	Slco2b1
Sirt3	Mpst	Llgl2
Ccn6	Fzd6	Folr1
Meioc	Parvg	Mllt10
Sec14l5	Troap	Cars
Tspan32	Stk32c	Cdh23
Opn4	Nsmce4a	Slc7a7
Tm9sf5	Nrip2	Tdrd3
Tnnt2	Syce3	Enox1
Best2	Mdm1	Smim22
Lpin1	Susd2	Mtf2
Hdac6	Ccdc90b	Efcab15
Hpca	Pkp3	Echdc2
Srrm1	Nudt17	Zfp850
D630003M21Rik	Rmi2	Hsf4
Pttg1	Rpl10l	Esp24
Gpr160	Hif3a	Scgb1b3
Megf11	Ccdc138	Sun1
Nxpe3	Sgsm1	Fsbp
Prr23a1	Crybg2	Rims2
Prr23a2	Lrrc51	Usp17le
Smim17	Megf6	Kcnj12
Il34	Eml2	Mical3
Iho1	Tnik	Cbs
Ly6h	Ythdc2	Clip4
Cntfr	Gprasp2	Spag16
Cpne6	Adgre5	Slc4a9
Dpp6	Lcorl	Aire
Gfra4	Ppp1r36	Cdc7
Tph1	Cog5	Tktl2
Poli	Elf3	Tk1
Rtkn	Shisal1	Sema6c
Gcnt1	Begain	Ada
Fer1l4	Plekhb1	Setmar
Rbl1	Otud6a	Kcnip2
Ctnnbip1	Fgfr3	Ahsg
Tmem230	Birc7	Cited1
Tpx2	Zbtb5	Arc
Alg12	Susd1	Gm867
Zfp937	Coq8a	Zmat4
Spdya	Pcgf2	Foxn1
Fbrsl1	Atp2a3	Gm11238
Nemp2	Fignl1	Dazl
Lrrc9	2700049A03Rik	Fkbp6
Eif4a3l1	Coa8	Tnnt1
Atat1	Mttp	Ecel1
Slc6a8	Hectd2	Lamb3
Zfp949	Cyp2d22	Itga6
Tent5c	Neurl1a	Snap91
Frrs1l	Arhgap19	Ube2t
Syce1	Nr1h4	Dmc1
Insyn2a	S100a14	Cryaa
Ppfia4	Senp3	Mroh2a
Vwa5b2	Lrrcc1	Ace
2810459M11Rik	Prph	Glrb
Rfpl4	Plxdc1	Rasal1
Gm13889	Psma8	Msh4
Btbd18	Sult6b1	Pcnt
Akain1	Satb1	Cobl
1500009L16Rik	Cfap70	Tcf24
6430550D23Rik	Chn2	Ildr1
Sult6b2	Nkd1	Osgepl1
Kcnt1	Cacna1h	Prc1
Lrrc74b	Rpap1	Dhx32
Armh1	Fbxo27	Pdyn
Mak	Dnaaf4	Atl2
Lrp4	Ush1c	Ssbp1
Adtrp	Pde9a	Xndc1
Ddx4	Brme1	Camk2a
Nat8f4	Rab37	Kif14
Cdin1	Wdr90	Atp9a
Pianp	Cracd	Rad1
Thap3	Ppp1r10	Cd1d2
Zfp691	Tbc1d24	Mme
Ttc39a	Rpl3l	Sox17
Ndrg2	Homer2	Tcl1
Dlgap2	Add3	Oard1
Atg4c	Ppp6r3	Tfr2
Rwdd2a	Pias2	Hormad1
Als2cl	Fbxl16	Amph
Hk1	Pwwp2a	Sass6
Msh5	Phf11c	Slc25a40
Clcnka	Wars	Brd8
Rbm46	Marchf5	Fhod3
Sbk2	Erlin1	Zfp740
Tlcd3b	Cep55	Clec2i
Eng	Mipol1	Mcf2
Smtn	Ankrd33b	Nxf2
Itih4	Dpys	Zap70
Cacnb1	Ablim3	Ccdc63
Grid2ip	Klhl29	Nanog
Casz1	Akap11	Palb2
Ube2v2	Rnf165	Cox6b2
Polq	Zfyve27	Zfp998
Dusp15	Dap3	Shisa7
Gjc1	Pdzk1ip1	Camk1d
B3gnt5	Egfl7	Ccnc
Rbp4	Vill	Abo
Ppm1b	Cdpf1	Atp1a3
Esrrb	Arhgap8	Mid1
Grip2	Trappc9	Lrriq4
Shd	Catsperg1	Wdr31
Wdr35	Trank1	Atp4a
Itgb6	Dnah6	C8a
Lnx1	Zfp229	Scml2
Lrrc57	Mpp4	Cwc22
Pigp	Hspb2	Tmx2
Hagh	Robo3	Ppp1r14d
Nek6	Eomes	Adal
Atp6v1c2	Bend4	Col17a1
Slc44a1	Slc52a3	Cpeb3
Crybb3	P2rx2	Wdr76
Proser2	Majin	Tekt5
Ppp1r16b	Rgs9	Pla2g10
Rsph6a	Nsun6	Mcm8
Nectin2	Dcaf17	Foxa2
Rab17	Slc4a5	Polr2a
Nr5a2	Arsg	Pfkp
Kctd18	Niban3	Fgf11
Mab21l4	Zfp712	Rbm39
Ralgps2	Cspg5	Sgk2
Cldn10	Ccdc33	Pcsk6
Tmem9	6030458C11Rik	Myo18a
Cgref1	Fam122b	Kif7
Klhdc7b	4931428F04Rik	Hnf1b
Plekha6	Spock1	Art5
Nfasc	Vmac	Rad51c
Svip	Dennd1b	Foxred1
Grm2	Slc39a11	Kyat3
Rnf152	Sec14l1	Nek1
Ccdc112	Dynlt1a	Polr3gl
Gstm4	Large2	Tuft1
Triml2	Cep95	Car7
Cd300lg	Spata31d1b	Agtrap
Timd2	Rhbdf2	Caprin2
Nxt2	Sirt4	Syt14
Eda2r	Gpr19	Usp1
Islr2	Rad18	Slc7a1
Tmem184a	Wipf3	Mpdu1
Cdc45	Nrg2	Slc7a3
Efcab6	Slc8a3	Dlgap3
Tgm1	Zyg11a	Cenpa
Siva1	1110032F04Rik	Nfe2
Gm15455	Tex11	Cdc37l1
Cblc	Mtbp	Mcm5
Taf7l2	Fam83h	Rnf138
Fam166b	Arhgap39	Aldoc
Efna1	R3hdm2	Hus1
1700012B07Rik	Scara5	Tmem265
Stra6	Ccdc125	Mlh3
Mpst	Ncmap	Col13a1
Parvg	Sarm1	Plekha7
Troap	Kcns3	Dtl
Fam174b	C2cd4c	Mcm10
Sh3d21	Fam114a2	Pigo
Stk32c	Rnf144b	E2f2
Nrip2	Elmod2	Mad2l2
Syce3	Wdr59	Akna
Mdm1	Rbm20	Cenpi
Susd2	Ncald	Bckdhb
Pkp3	Wdr33	Ggt1
Nudt17	Dbndd1	Itga3
Rpl10l	Abat	Ints7
Pcx	Il4i1b	Nadsyn1
Hif3a	Bdh2	Sema4f
Ccdc138	Lrrc56	Pigbos1
Sgsm1	Senp8	Gm27021
Crybg2	Dis3l2	Porcn
Lrrc51	Thpo	Gpr50
Megf6	Cacna2d2	Lrrc31
Ccdc81	Camk2b	Zfp141
Fyb2	Map3k9	Robo4
Eml2	Rasgrp4	Gm45929
Pkd2l2	Klk11	Dpm1
Micos10	Mroh4	Tmem218
Gprasp2	Zfp516	Crocc2
Hcrtr1	Mymx	Synpo2l
Adgre5	Plekhd1	Ankle1
Ppp1r36	Zkscan7	Cnpy1
Elf3	Ect2	Zfp423
Shisal1	Slc45a3	Fam126b
Begain	Grb10	Pmf1
Plekhb1	Grin1	Gata4
Otud6a	Ablim2	Zfp606
Fgfr3	Tsc22d1	Gm21761
Birc7	Rgs20	Pmvk
Zbtb5	Afap1l2	Igfbp2
Susd1	Rapgef3	Usp37
Coq8a	Otub2	Lrcol1
Atp2a3	Phka2	Cabp1
Fignl1	Rpgr	Gpr83
2700049A03Rik	Zmym3	Siglech
4930579F01Rik	Prdm16	B3gat1
Coa8	Tfdp2	Glb1l2
Mapk8ip3	Rhox13	Marchf11
Mttp	Psrc1	Ing3
Abi3	Tmem132b	Celf6
Rhpn1	Kcng2	Tmem209
Cyp2d22	Caly	Khdc3
1810010H24Rik	Bend7	Mkrn1
Neurl1a	Ddah2	Tpk1
Arhgap19	Dcaf12l1	Elovl2
S100a14	Ddx19b	Unc5a
Pgam5	Dnajc1	1700037H04Rik
Lrrcc1	Kat2b	Bmf
Prph	Kif17	Kcnn2
Plxdc1	Ndfip2	Hnf4a
Sult6b1	Ddx43	Cux2
Etfrf1	Lysmd4	Mcm6
Satb1	Cldn7	Lta4h
Cfap70	Dlc1	Asgr2
Chn2	Acp4	Cd79b
Nkd1	Tmc8	Krt13
Cacna1h	Cfap73	Aldh6a1
Fbxo27	Foxl3	Ppp1r1b
Dnaaf4	Gm3336	Dmd
Ush1c	Gfy	Etv4
Pde9a	Kifc1	C8b
Brme1	Srsf7	2810408A11Rik
Rab37	Dclk2	Rnf167
Tcf19	Arhgap32	Mrpl2
Wdr90	Gm5901	H2az1
Tmprss3	Rgs22	Fbrsl1
Odad3	Map7	Prss36
Ppp1r10	Aatk	Mmp28
Tbc1d24	Ccpg1os	Klk1
Homer2	Adgrg1	Setdb2
Bcap29	Gm7694	Gm45935
Pias2	Itsn2	Klk8
Mtm1	Tcof1	6720489N17Rik
Phf11c	Spc25	Sycp2l
Ccser1	Ascc1	Slc6a16
Marchf5	Slc38a3	Zfp990
Erlin1	Sptbn4	Tipin
Cep55	Tex14	Adamts8
Bcas1	Cacng5	Suclg2
Mipol1	Pnck	Zfp354a
Dpys	Vps37d	Clgn
Sipa1	Adgrb2	Habp2
Ablim3	Topaz1	Cradd
Akap11	Zfp839	Tra2b
Dap3	Tac2	Smim8
Pdzk1ip1	Msi2	Zfand1
Sec22c	Kcnj11	Abhd6
Egfl7	Reep2	Alox12
Vill	Reep6	B230311B06Rik
Zfp961	Scarb1	Fam111a
Cdpf1	Cyb5r2	Zfp33b
Arhgap8	Nrxn2	Col26a1
Pwwp3b	Kat6b	Pyy
Trappc9	Tmem39a	Cyp11a1
Catsperg1	Psat1	H2az2
Trank1	Papln	Acot11
Dnah6	Shisa8	S100pbp
Zfp229	Fignl2	Nipal3
Mpp4	Rnf223	Rpl22l1
Hspb2	Fam160a2	Zfp654
Robo3	Ncoa6	Vwa7
Adamts20	Cep57l1	Jakmip1
Eomes	Gm11837	Abcc10
Coro2a	Zfp383	Dcbld1
Bend4	Trim34b	Oas2
Slc52a3	Zkscan8	Rad51ap1
P2rx2	Ggnbp1	Akap7
Dcaf4	Cacna1a	Lama3
Majin	Gga3	Tmtc1
Rgs9	Greb1	Lmntd2
Nsun6	Cadps2	Fbxl3
Trim45	Shmt2	Urah
Dcaf17	Pan2	Ybx2
Tmem215	Syt1	Mylpf
Slc4a5	Rundc3a	Pycr1
Ccdc74a	Pou5f1	Ankrd49
Dmkn	Cyfip2	Trpa1
Zfp712	Cmtm7	Ddx11
Mgll	Inca1	Smim27
Cspg5	Osbpl1a	Ptprd
6030458C11Rik	D430019H16Rik	Eif1ad16
Fam219b	Ehbp1	Map4k1
Fam122b	Hfm1	Sigirr
Ptp4a3	Zfp82	Ckmt1
Rab3a	Llgl2	Eri2
Spock1	Gstz1	Cyb5r1
Vmac	Mllt10	Plcb4
Slc39a11	Rad51b	Nuf2
Sec14l1	Sulf2	Scn3a
Dgkz	Cars	Bcar3
Dynlt1f	Cdh23	Rps28
Dynlt1a	Dmtn	Zkscan16
Dynlt1c	Smc5	Rif1
Large2	Kcnma1	Polr1h
Klhl33	Serinc2	Pdss1
Cep95	Elmod3	Epb41l4b
Cfap77	Tdrd3	Extl1
Spata31d1b	Smim22	Mindy3
Rhbdf2	Racgap1	Dph7
Sirt4	Tmem52	Dscc1
Rad18	Tet1	9930104L06Rik
Chchd6	Scn5a	Casq2
Wipf3	Mtf2	Klf15
Nrg2	Sez6l	Syt2
Zyg11a	Efcab15	Nphp4
1110032F04Rik	Zfp850	Myl4
Tex11	Ubox5	Tmeff1
Mtbp	Hsf4	Ssr2
Fam83h	Rslcan18	Coq3
Arhgap39	Mib2	Map2k6
Sugp2	Sun1	Btf3l4
Ccdc125	Fsbp	Cyb561
Pdcd4	BC107364	Fam205c
Ncmap	Rims2	Aldh1l1
Zdhhc24	Epha10	Kcnc4
Sarm1	9030624G23Rik	Ndufaf1
Kcns3	Usp17le	Kyat1
C2cd4c	Kcnj12	Dusp12
Ccdc127	Dpf3	Apmap
Gtse1	Eef2k	Pecr
Endou	Zdbf2	Ift52
Cd163	Mical3	Pramel6
Rnf144b	Gm19345	Prkaa2
Elmod2	Bin2	Amhr2
Lrrc36	Cbs	Mcm7
Rbm20	Ephx2	Crtac1
Dbndd1	Enox2	Ube2d3
Abat	Gabpb1	Smc4
Mal	Scube1	Uba1y
Obscn	Clip4	Eif2s3y
Actl10	Spag16	Mettl4
Bdh2	Myh14	Kank3
Lrrc56	Slc4a9	Klf8
Dis3l2	Aire	Herpud1
Fam221a	Cdc7	Kcng4
Olfr376	Sec1	Nutf2
Fxyd4	Rpl37rt	1700018B08Rik
Rlbp1	Sort1	Sorl1
Cacna2d2	Socs1	Carmil2
Camk2b	Gja3	Dbt
Map3k9	C8g	Exoc3l
Rasgrp4	Ano7	Cggbp1
Septin6	Eya2	Cpne4
Klk11	Sema6c	Pm20d1
Cebpzos	Tle5	Mei4
Mroh4	Epc1	Rbbp5
Zfp516	Setmar	Zbtb7c
Mymx	Kcnip2	Xrcc5
Plekhd1	Ahsg	Tmem266
Zkscan7	Arc	Rpl10a
Trim61	Fer1l5	Olfm2
Slc10a1	Gm867	Sgsm3
Eif1ad8	Zmat4	Tdrkh
Eif1ad4	Grip1	Mpzl2
Slc8b1	Dazl	Tnfrsf13c
Slc5a6	Fkbp6	6030458C11Rik
Ect2	Tnnt1	Gng13
Slc45a3	Ecel1	Spats1
Gal3st1	Lamb3	Gm973
Ablim2	Sh3gl3	Gm1070
Tsc22d1	Itga6	Ppcdc
Clcc1	Snap91	Wscd1
Fbxw7	Ube2t	Lysmd4
Afap1l2	Dmc1	Gm38396
Rapgef3	Cryaa	Aars2
Otub2	Mroh2a	Wdr47
Igsf5	Ace	Slc9b1
Aamdc	Glrb	Fam241b
Rpgr	Rasal1	Shld1
Prdm16	Cnga3	4930519F16Rik
Tfdp2	Msh4	Vpreb3
Rhox13	Deaf1	Usp17lb
Zscan4b	Tjp3	Usp11
Psrc1	Pcnt	Slc25a15
Gpr155	Cobl	Gabra1
Tmem132b	Tmem201	Tmem29
Kcng2	Tcf24	Hap1
Caly	Carf	Coprs
Bend7	Tbx1	Slc2a4
Ddah2	Ildr1	Csad
Dcaf12l1	Wnt11	Rtkn2
Ddx19b	B4galt4	Fam229b
Kif17	Grk3	Tmem108
Lancl1	Osgepl1	Actr6
Ndfip2	Zmym6	Mtus2
Ddx43	Dapk1	Zfp454
Lysmd4	Zranb3	Pitpnc1
Cldn7	Prc1	Mettl25
Pag1	Unk	8030474K03Rik
Acp4	Tubgcp2	Ccdc38
Tmc8	Dhx32	Adgrb1
Ccer2	Ghrl	Lcorl
Cfap73	Elf1	Zc3h13
Foxl3	Pdyn	Elapor2
Nek10	Atl2	Sh3tc1
Gm3336	Xndc1	Rpl15
Gfy	Pacsin1	Paqr3
Tgfbr3l	Camk2a	Oasl1
Kifc1	Sct	Ccdc60
Dclk2	Alpl	Dis3
Gm5741	Kif14	Ap5m1
Ccdc170	Atf4	Shld2
Nuggc	Crhr2	Zfp959
Gm5901	Atp9a	Morc2b
Rgs22	Mme	Cpne5
Gprc5b	Sox17	Bbs9
Map7	Tcl1	Dclre1a
Aatk	Tfr2	Morn2
Ccpg1os	Hormad1	Ocln
Adgrg1	Amph	Rps24
Gm7694	Sass6	Tmtc4
Trp53inp1	Spata7	Ipo5
Spc25	Chfr	Rcbtb1
Ascc1	Psd2	Elobl
Slc38a3	Tfcp2	Msc
Sptbn4	Brd8	Rnf2
Tex14	Zap70	Zfp184
Cacng5	Btn2a2	Zfp553
AI987944	Mynn	Gpa33
Pnck	Fhod3	Arhgap26
Vps37d	Arhgap33	Pfn4
Adgrb2	Mcf2	Itgae
Tac2	6820408C15Rik	Acan
Magec2	Mturn	Tdrp
E330021D16Rik	Rnf32	Slain1
Cyp4f14	Rufy3	Tmem63c
Oprk1	Poln	Plcd3
Kcnj11	Ccdc63	Tmem161b
Reep2	Nanog	Pold2
Gm11544	Cox6b2	Gstp3
Scarb1	Per3	Fam234b
Nrxn2	Csnk1e	Zfp977
Kat6b	Zfp189	Abtb1
Tmem39a	Pld6	Gm5165
Papln	Shisa7	Atad2b
2610528A11Rik	Ism2	Sncb
Shisa8	Wnk2	Plaat3
Fignl2	Slc26a8	Gm550
Rnf223	Mybl1	Ubtf
Fam160a2	Snapc4	Knl1
Zfp976	Usp45	Slc34a3
Bcat2	Atp1a3	Duox2
Cep57l1	Tmem91	Acot8
C87436	Ttc14	Dgke
Zfp383	Zer1	Ranbp17
Ggnbp1	Mid1	Uqcr10
Cacna1a	Dolpp1	Rnf212
Greb1	Lrriq4	Itgb3bp
Tmem106c	Plp1	Pla2g4e
Amz2	Ralgps1	Odad4
Pan2	Atp4a	Ppp1r9a
Rundc3a	Gapdhs	Igsf23
Slc25a19	Cntrl	Zfp286
Cyfip2	Scml2	Odad1
Mlst8	Scn9a	Piwil2
Cpt1c	Kcnc3	Rab44
Tjap1	Becn2	Igfals
Slc30a6	Foxj3	Lims2
Cmtm7	Ephb2	Fbxo15
Inca1	Ppp1r14d	1700019D03Rik
D430019H16Rik	Adal	Nudt12
Zfp82	Col17a1	Zfp958
Slco2b1	Cpeb3	Polr1has
Llgl2	Clstn1	Osr2
Gstz1	Tekt5	Rbm26
Rad51b	Usp43	1700019N19Rik
Matn4	Mcm8	Ccnt1
Cars	Polr2a	Pax2
Cdh23	Aifm3	Arhgef38
Hrh1	Pfkp	Piwil4
Smc5	Dpf2	Prdm11
Serinc2	Fgf11	Grtp1
Elmod3	Rbm39	Dab1
Smim22	Dhx35	Meiosin
Scn5a	Emilin3	Tle7
Tmem205	Rph3al	Shoc1
Mtf2	Apba2	Gm38999
Sez6l	Pcsk6	Gm36210
Efcab15	Pcmtd2	Lsmem2
Echdc2	Myo18a	Dnah12
Zfp850	Kif7	Rnf212b
Bmp8a	Sez6	Gm36718
Hsf4	Hnf1b	Ankrd31
Gm5141	Misp3	Vinac1
Mib2	Art5	Ppp1ccb
Sun1	Dido1	Emid1
Fsbp	Rad51c	Ly6g6d
Prdm2	Adcy9	Gm21818
Epha10	Nek1	Pzp
9030624G23Rik	Polr3gl	Abca4
Zfp995	Tuft1	Chrna7
Usp17le	Rorc	Acvr1b
Kcnj12	Kcnh2	Gpr182
Mical3	Cmc4	Parp1
Gm19345	Ngb	Adrb1
Bin2	Car7	Nr0b1
Ifitm7	Kctd19	Alppl2
Calcoco2	Capn5	Aplp1
Cbs	Gab1	Atf1
Ankra2	Caprin2	Bard1
Ager	Syt14	Hrk
Gabpb1	Tspan33	Bmp6
Scube1	Usp1	Capn3
Clip4	Slc7a1	Ccnb2
Chka	E4f1	Ccnf
Myh14	Azin2	Cd3e
Slc4a9	Dlgap3	Cdk1
Aire	Cenpa	Chek1
Cdc7	Aktip	Chga
Tktl2	Cdc37l1	Ovgp1
Sec1	Gzmm	Cidea
Gja3	Mdm4	Cit
Pgf	Qsox2	Cplx1
C8g	Aldoc	Cry1
Ano7	Hus1	Cycs
B3gnt9	Stil	Dcc
Eya2	Col13a1	Dhh
Sema6c	Plekha7	Dffb
Arvcf	Ccna1	Dsg2
AA414768	Dtl	Usp17la
Ada	Pigo	Cela2a
Tle5	E2f2	Epha4
Epc1	Mad2l2	F2rl1
Kcnip2	Pank4	Fbp2
Spns2	Apoe	Fdx1
Rad21l	Ggt1	Fdxr
Ahsg	Itga3	Fgf3
Slc17a5	Mmp11	Fgfr4
Slc19a2	Trim68	Fzd4
Cited1	Hhipl2	G0s2
Arc	Nadsyn1	Gabpa
Gm867	Stat4	B4galnt2
Zbtb24	Zfp51	Gc
Zmat4	Sema4f	Gcnt2
Tbxa2r	Aldh2	Gja4
Foxn1	Porcn	Gpr27
Adck1	Gpr50	Guca1a
Gm11238	Lrrc31	H2-Bl
Dazl	Gm45929	H2-Oa
Fkbp6	Dpm1	Hcn2
Tnnt1	Tmem218	Hdac2
Ecel1	Synpo2l	Hdc
Lamb3	Mei1	Hells
Rad51d	Ank1	Foxq1
Sh3gl3	Pde4c	Foxa1
Itga6	Asic3	Hsd17b2
Snap91	Asb10	Ipp
Ube2t	Bend6	Kcnb1
Dmc1	Ankle1	Kcnu1
Cryaa	Osbpl7	Napsa
Mroh2a	Cnpy1	Kif4
Ace	Zfp423	Lama1
Csmd2	Ankrd23	Lrrn1
Glrb	Ankrd39	Ltk
Rasal1	Scrib	Mcm3
Tekt1	Paqr6	Mcm2
Cnga3	Fam126b	Mcm4
P2ry1	Lgi2	Mesp2
Cyb561a3	Pmf1	Mfng
Deaf1	Gata4	Mras
Tjp3	Rassf6	Msh2
Pcnt	Igfbp2	Mthfd2
Cobl	Usp37	Mmut
Artn	Caps2	Mybl2
Tmem201	Lrcol1	Mybpc3
Septin4	Cabp1	Klk1b3
Chit1	Cnksr2	Nid2
Tcf24	Gemin8	Nos1
Cbfa2t2	Rnf220	Nos3
Tbx1	Tenm4	Npr1
Rps6ka1	Tex26	Ntrk3
Ildr1	B3gat1	P2rx1
Wnt11	Glb1l2	Pdha2
B4galt4	Marchf11	Padi2
Grk3	Dixdc1	Pfkfb1
Osgepl1	Lingo1	Prkci
D630023F18Rik	Celf6	Pla2g2c
Zmym6	Tmem209	Pola1
Dapk1	Elovl2	Prim1
Ubxn10	Celf5	Prim2
Prc1	Unc5a	Psmc3ip
Unk	Xrn1	Pipox
Ghrl	Bmf	Ptpn20
Atl2	Kcnn2	Pura
Xndc1	Hnf4a	Rad51b
Pacsin1	Cux2	Rfx2
Camk2a	Apool	Rpl12
Tspear	Cdk5rap2	Polr2c
Sct	Actg1	Rrm2
Alpl	Asgr2	Ryr1
Kif14	Cd79b	Stmn3
Rskr	Krt19	Slc1a1
Lrit3	Aldh6a1	Slc1a5
Crhr2	Ppp1r1b	Sox1
Atp9a	Dmd	Serpina3m
Cd1d2	Etv4	Sephs2
Mme	Pctp	Stra8
Sox17	C8b	Syngr1
Tcl1	2810408A11Rik	Tacr2
Egflam	Nudt14	Hnf1a
Tfr2	Rnf167	Tcf15
Hormad1	Qpct	Tfam
Amph	Rasgef1a	Tgm3
Mpv17l	Prss36	Tlx2
Spata7	Mmp28	Tnfrsf8
Radil	Setdb2	Pglyrp1
Psd2	Gm45935	Tst
Tfcp2	Klk8	Tsx
Brd8	Sntg2	Tuba3a
Zap70	Slc6a16	Tuba3b
Btn2a2	Adamts8	Slc32a1
Fhod3	Suclg2	Vil1
Arhgap33	Zfp354a	Wnt6
Nxf2	Hspa12a	Zfp101
Mturn	Clgn	Zfp42
Rnf32	Gdf15	Zic3
Poln	Zfand1	Zik1
Ccdc63	Alox12	Slc30a1
Nanog	Rnf181	Adcy1
Cox6b2	Trappc6a	Parp2
Per3	Zfp33b	Alox12b
Csnk1e	Col26a1	Apob
Ccdc169	Ccdc28a	Apobec2
Pld6	Pyy	Atp1b1
Shisa7	Cyp11a1	Bche
Plppr2	H2az2	Bmp15
Ism2	Slc4a8	Klf5
Wnk2	Krba1	Bub1b
Igdcc4	Ipmk	Aspm
Slc26a8	S100pbp	Casq1
Zfand4	Pcbp3	Ccna2
Plcb3	Nipal3	Cdc25c
Mybl1	Rpl22l1	Cdh4
Snapc4	Usp48	Cdh5
Usp45	Spen	Cdk5r2
Atp1a3	Zfp654	Cdx1
Tmem91	Rundc3b	Celsr1
Ttc14	Slc30a3	Cga
Mid1	Jakmip1	Col15a1
Dolpp1	Ulk1	Cox7a1
Lrriq4	Abcc10	Cpt1b
Acer2	Mmab	Cyct
Plp1	Crb3	Dapk2
Ttc16	Dcbld1	Dkk1
Ralgps1	Med13l	Usp17lc
Atp4a	Ndufb8	S1pr4
Gapdhs	Oas2	Edn1
Lhx2	Rad51ap1	Epas1
Scml2	Akap7	Ephb3
Tmem14a	Nt5dc1	Erf
Kcnc3	Tmtc1	F2
Becn2	Slc8a2	Faah
Suv39h1	Lmntd2	Fgf1
Osbpl6	Fbxl3	Fgf4
Tmx2	Bahcc1	Fhl4
Ephb2	Lmo7	Fkbp5
Sec24a	Ybx2	Gast
Ppp1r14d	Atxn2l	Gata6
Inpp4a	Ksr1	Gjb5
Haus2	Pycr1	Haspin
Col17a1	Ptprd	H1f6
Cpeb3	Yjefn3	H2-Q10
Wdr76	Gm10509	Hal
Trim11	Map4k1	Hesx1
Tekt5	Sigirr	Foxd3
Astl	Ckmt1	H2ax
Pla2g10	Eri2	Hoxc13
Rnf112	Paqr8	Elavl3
Lzts3	Cyb5r1	Ihh
Usp43	Plcb4	Inhbc
Syngr4	Nuf2	Kcnab3
Foxa2	Slc6a9	Kif11
Aifm3	Garnl3	Kif15
Fgf11	Strbp	Klf12
Dhx35	Bcar3	Lamc1
Emilin3	Rif1	Lat
Ptprt	Ccnl1	Lgals4
Tlcd2	Epb41l4b	Lgals6
Apba2	Extl1	Phyh
Pcsk6	Rps21	Muc13
Myo18a	Naga	Matn3
Kif7	Top1mt	Mbd4
Sez6	Klf15	Mgat3
Hnf1b	Ddx5	Mog
Nmb	Syt2	Morc1
Misp3	Spidr	Neb
Chrdl2	Nphp4	Nfatc2ip
Art5	Myl4	Notch4
Prkcg	Tmeff1	Otx1
Rad51c	Ptk6	Pax8
Foxred1	Ssr2	Padi3
Birc2	Mpp2	Padi4
Kyat3	Coq3	Abcb1a
Nek1	Cyb561	Piga
Polr3gl	Dennd2c	Pnliprp2
Tuft1	Slc2a8	Pole
Rorc	Sec61a2	Pole2
Tm6sf2	Aldh1l1	Pou2f3
Tmem161a	Oscp1	Pou4f1
Kcnh2	Kcnc4	Prkdc
Cmc4	Susd4	Pygm
Ccdc130	Kyat1	Rad51
Ngb	Dennd4b	Rps12
Apela	Optn	Rps6ka2
Car7	Ift52	Shcbp1
Kctd19	Agbl2	St6galnac3
Nrn1l	Prkaa2	Slc2a3
Capn5	Amhr2	Slc34a2
Gab1	Crtac1	Slc4a1
Caprin2	Taf6	Slc7a5
Hsdl2	Slc25a28	Smr3a
Syt14	Ppp6r2	Sncg
Tspan33	Smc4	Sox7
Slc7a1	Eif2s3y	Star
Vsx2	Dop1b	Stc2
Fdx1	Slc25a27	Plk4
Azin2	Mettl4	Eif1
Dlgap3	Flywch2	Sycp1
Cenpa	Kank3	Sycp3
Erg	Klf8	Tbx3
Lmo1	Adat1	Tdgf1
Tmem138	Herpud1	Tie1
Aktip	Kcng4	Trim28
Nfe2	Cfap97	Top2a
Cbln2	Dusp26	Trap1a
Acy3	Nutf2	Plscr1
Gzmm	Spata6	Xntrpc
Osbp2	Zdhhc2	Zrsr1
Mdm4	1700030J22Rik	Ugt8a
Qsox2	Igdcc3	Zan
Agfg2	Sorl1	Zfp59
Aldoc	Arih2	Zfp97
Hus1	Spc24	Ikzf3
Slc9a8	Carmil2	Adam23
Stil	Dbt	Impdh2
Col13a1	Adhfe1	Mmp17
Pex26	Tmem44	Nt5e
Plekha7	Cggbp1	Spry2
Ccna1	P4htm	Spry4
Dtl	Mei4	Clcn6
Pigo	Pm20d1	Gnpda1
E2f2	Rbbp5	Orc5
Mad2l2	Csnk1a1	Rpl27a
Cenpi	Zbtb7c	Sema4g
Bckdhb	Tbc1d8	Dpysl4
Arx	Pif1	Asns
Ggt1	Abcc8	Atp1b2
Itga3	Rpl10a	Clu
Car12	Olfm2	Epb41l4a
Mmp11	Gpatch2	Cdca3
Trim68	Cryz	H2-Ke6
Hhipl2	Zfp40	Hebp1
Nadsyn1	Tdrkh	Hmmr
Zfp51	Map3k4	Hspb1
Sema4f	Mpzl2	Itgb7
Gm27021	Tnfrsf13c	Madcam1
Aldh2	Catsperd	Nodal
Porcn	Gm1070	Sema5b
Mtrr	Kdm4b	Sptb
Gm11715	Lrrc75a	Ttr
Gpr50	Wscd1	Podxl
Lrrc31	Gm38396	Dbf4
Gm45929	Gm7072	Plek2
Dpm1	Aars2	Nufip1
Tmem218	Slc9b1	Clnk
Zfp119b	Slc38a4	Mmel1
Synpo2l	Armh4	Abcc2
Mei1	Fam241b	Dnah8
Ank1	Fam161b	Baz1a
Pde4c	Cfap300	Ly75
Asic3	Brd8dc	Sfrp1
Asb10	Vpreb3	Hunk
Bend6	Ndufb11	Dkkl1
Ankle1	Elfn2	Icosl
Osbpl7	Madcam1	Sntb1
Ankrd23	Septin3	Crym
Khk	Gnaz	Il27ra
Ankrd39	Zfp14	Sfrp4
Scrib	Usp11	Aqp3
Paqr6	Hap1	Uchl3
Fam126b	Slc2a4	Rpl13
Lgi2	Csad	Nptx2
Gata4	Cars2	Chst3
Zfp606	Svop	Rbm3
Pikfyve	Mlxipl	Acrbp
AF067061	Scml4	Acsm3
Gm21761	Rev1	Spint1
Pmvk	Afg1l	Fanca
Zfp442	Rtkn2	Stag3
Ccdc122	Tpd52l1	Rpl5
Rassf6	Fam229b	Septin1
Igfbp2	Tmem108	Clca1
Usp37	Zbtb49	Nme6
Caps2	Mtus2	Wbp4
Lrcol1	Rbm5	Sfrp5
Cabp1	Pitpnc1	Syt7
Cypt3	8030474K03Rik	Nup210
Cnksr2	Lrp11	Apom
Gemin8	Adgrb1	Ift20
Egf	Hscb	Slc1a4
Pde4a	Hps4	Mia
Tex26	Nudt13	Fbp1
Glb1l2	Zc3h13	Prx
Ankrd61	Elapor2	Ncapg
Marchf11	Galnt11	Gabbr1
Dixdc1	Slc7a4	Ramp2
Lingo1	Zfp445	Fmn2
Celf6	Oasl1	Nphs1
Tmem209	Sfswap	Ppie
Mkrn1	Hnrnpa3	Tamalin
Elovl2	Zfp512	Dnah10
Celf5	Ppp2r2c	Cited4
Unc5a	Ccdc60	Htra1
Klhl12	Cdkn3	Plce1
1700037H04Rik	Dis3	Cbln1
Bmf	Ap5m1	Rpl21
Il12rb2	Shld2	Diaph3
Kcnn2	Frmd5	Aldh18a1
Hnf4a	Zfp959	Clcnkb
Cux2	Cpne5	Slc2a5
Ihh	Bbs9	Cpb2
Pkp1	Rabggta	Acp6
Eif2ak3	Rec8	Slc5a1
Actg1	Dzip1	Acss2
Asgr2	Dclre1a	Atr
Crhr1	Morn2	Papolb
Cd79b	Zfp235	Chst5
Krt13	Caskin1	Tex101
Krt19	Zfp799	Fgf21
Aldh6a1	H2-DMa	Rfc2
Ppp1r1b	Ocln	Scube2
Rdh12	Cab39l	Bcam
Dmd	Tmtc4	Vsig2
Mpz	Ipo5	Sult5a1
Etv4	Rcbtb1	Xrcc2
C8b	Rplp2	As3mt
Sh3bp1	Zfp788	Zc3h8
Slc27a3	Slc12a7	Nrip3
Mapkapk3	Chmp2a	Fam3b
2810408A11Rik	Ccp110	Piwil1
Nudt14	Rprd1a	Glp1r
Rnf167	Msc	Snrpa1
Prxl2a	Rnf2	Tesc
Rasgef1a	Zfp184	Rhbg
Prss36	Kif27	Tacr3
Klk1	Zfp553	Vstm2b
Frmpd3	Gpa33	Zbtb32
Klk8	Mapk4	Nectin1
Sntg2	Phf10	Gpr180
Rab3d	Arhgap26	Pga5
Slc6a16	Gm18905	Tulp1
Suclg2	Gm15246	Nrip2
Zfp354a	Acan	Donson
Igsf9b	4933427D14Rik	Cenpk
Hspa12a	Tdrp	Eed
Clgn	Slain1	Cenph
Gal	Dmac2l	Syt9
Gpx3	Tmem63c	Niban1
Habp2	Plcd3	Nrgn
Fmo1	Pdk2	Sv2a
Poll	Pold2	Slc13a2
Gdf15	Gstp3	Myl7
Smim8	Fam234b	Bhmt2
Zfand1	Zfp977	Lpar3
Tfb2m	Tarm1	Pkmyt1
Abhd6	Abtb1	Eefsec
Adora2a	Gm5165	Pbk
Alox12	Atad2b	Slc5a4b
Hyal1	Tert	Ndc80
Rnf181	Otop2	Pla2g12b
C130073F10Rik	Sncb	Slc44a4
Trappc6a	Klhl3	Gtf2a1l
Fam111a	Plaat3	Riox1
Prr5	Gm550	Capn9
Col26a1	Pigt	Abcb6
Fbxl21	Knl1	Tfcp2l1
Ccdc28a	Slc34a3	Paqr4
Pyy	Dgke	Jam2
Gpr142	Ranbp17	Ryr2
Hid1	Rnf212	Cep70
Cyp11a1	Hmx1	Sapcd1
Snx31	Odad4	Rps23
Cfap206	Lyrm7	Nop56
H2az2	Sfi1	Mfn1
Fbln1	Pdgfa	Ankrd22
Slc4a8	Ppp4r3b	Tomm20
Plk5	Rnf43	Kif23
Acot11	Hmgb2	1700016D06Rik
Atp6v0e2	Sepsecs	Popdc3
Dynlt2b	Ppp1r9a	Ky
S100pbp	Clpb	Lap3
Pcbp3	Zfp286	Tsnaxip1
Nipal3	Odad1	Pcbd1
Rpl22l1	Piwil2	Dppa5a
Usp48	Mlycd	Natd1
Spen	Acyp1	Tspan13
Zfp654	Phkb	Ska2
Slc30a3	Colgalt1	Dnajc15
Podxl2	Ppp1r3b	Arl4d
Vwa7	Pts	Uqcrc1
Jakmip1	Zfp420	Them5
Atp6v1g2	Plagl1	Serpinb1a
Cckar	Rab44	Llph
Ulk1	Mlc1	Ing5
Abcc10	Gnmt	1700020L24Rik
Mmab	Igfals	Ndufb11b
Rab15	Polh	Tsfm
Crb3	Ppargc1b	Mcts2
Ninj2	Lims2	Lgals2
Dcbld1	Tctn3	Rdm1
Ndufb8	Glce	Gemin2
Akap7	Dtx3	Ribc1
Stard3nl	Tmem59l	Tex12
Nyap1	Pex11g	Rbm4b
Tmtc1	Nudt12	Spesp1
Slc8a2	Polr1has	Klhl10
Lmntd2	Katnal2	Adat2
Fbxl3	Osr2	Tmem170
Polk	Coro6	Plbd1
Cenpx	Rbm26	Naa16
Npb	H2-Q2	Tmem107
Stard4	Pax2	Dsn1
Lmo7	Arhgef38	Trim59
Ybx2	Arhgef4	2310030G06Rik
Mylpf	Dlec1	Swsap1
Atxn2l	Piwil4	Pole4
Pycr1	Prdm11	Smarcd3
Dok7	Grtp1	Timm21
Yjefn3	Dab1	Pgc
Eif1ad16	Pnisr	Mastl
Gm10509	Tle7	Ccdc77
Lcmt1	Shoc1	Eif2s2
Map4k1	Gm38999	Obi1
Sigirr	Gm36210	Gemin6
Entpd6	Rnf212b	Cers4
Ckmt1	Hmcn2	Dipk1a
Eri2	Gm13420	Bbs2
Paqr8	Ankrd31	Soga3
Garnl3	Sptbn5	Poc5
Strbp	Emid1	Gpalpp1
Bcar3	Trpv3	Slc47a1
Mapkbp1	Ly6g6d	Patl2
Ndrg3	Sall1	Bend5
Dnajb5	Pzp	Tm7sf3
Epb41l4b	Abca4	Elob
Extl1	Acads	Dgat2
Rps21	Chrna7	Pllp
Naga	Acvr1b	Poldip2
Dph7	Gpr182	Knstrn
Top1mt	Adrb1	Cmc1
Tmprss6	Nr0b1	Abca14
Klf15	Alppl2	Sugt1
Bcl2l14	Aplp1	Zcchc10
Pramel12	Aqp7	Ooep
Syt2	Atp2a1	Tppp3
Nphp4	Atp7b	Mphosph10
Myl4	Bard1	Zwilch
Slc35d1	Barx1	Chd1l
Gpam	Hrk	Mrnip
Ptk6	Bik	Cdca8
Ccdc163	Bmp6	Etaa1
Ssr2	Bmp7	Rpl39l
Mpp2	Bsn	4930591A17Rik
Map2k6	Car5a	Mcrip2
Coq3	Cckbr	Mto1
Gstm7	Ccnb2	Gabarapl2
Btf3l4	Ccnf	9530077C05Rik
Ssu2	Cd3e	Col6a4
Cyb561	Cd79a	Fitm1
Pabpc4	Cd9	Hddc3
Dennd2c	Cdk1	Gtf2f2
Oxld1	Chek1	Ubac2
Slc2a8	Chkb	Atp2c2
Sec61a2	Ovgp1	Chac1
Aldh1l1	Cidea	Gins1
Kcnc4	Cit	Dcps
Prpf18	Clcn3	1700001L19Rik
Susd4	Col9a2	Cfap206
Ndufaf1	Cplx1	C8g
Srsf12	Cry1	Clic3
Kyat1	Dhh	Ndufaf5
Snorc	Dffb	Hddc2
Sult4a1	Dlx4	Smyd3
Pecr	Drd4	Dph5
Tvp23b	Dsg2	Scrn1
Ift52	Eif4ebp1	Manba
Agbl2	Eln	Ly6g6e
Prkaa2	Epha4	Spdl1
Amhr2	Epha8	Polr3b
Crtac1	Ptprv	Wdr77
Slc25a28	Esx1	Tmem144
Pgm2	Faf1	Cep192
Smc4	Fbp2	Wdr20rt
Ppp1r35	Fdx1	Tex19.2
Dnajc4	Fdxr	Cabs1
Rrm2b	Fgf3	Septin12
Gtpbp10	Fgfr4	Zranb3
Uba1y	Foxm1	Tex52
Eif2s3y	Dtx1	Fbxo24
Dop1b	G0s2	Dmrtc2
Slc25a27	B4galnt2	Noxred1
Mettl4	Gcgr	Ccdc191
Kank3	Gcnt2	Ggt6
Gmppa	Gdf9	Mcm9
Klf8	Gja4	Ceacam20
Adat1	Gpr27	Smug1
Herpud1	Grid1	Amdhd1
Kcng4	Grin2d	1300017J02Rik
Cfap97	Gspt2	Mtfr2
Proz	Gstm6	Lrrc34
Nutf2	Guca1a	Tcp11x2
Zdhhc2	H1f0	Dpep3
4933405L10Rik	H2-Bl	Fam217a
1700018B08Rik	H2-Oa	Cfap45
Sorl1	H3f3b	Ppm1j
Tmem38a	Hcn2	Haus5
Arih2	Hcn3	Dus4l
Carmil2	Foxj1	Tube1
Dbt	Foxd1	Prr23a3
Adhfe1	Mst1	Acad10
Tmem25	Foxa1	Slc39a4
Alg3	Foxa3	Anks4b
Tmem44	Onecut1	Gcnt3
Cggbp1	Hpgd	Cracdl
P4htm	Hspg2	Zbtb46
Pm20d1	Inhbb	Cenpn
R3hdm1	Ipp	Thumpd2
Rbbp5	Kcnb1	Spata31d1a
Rnf111	Kcnj4	2200002D01Rik
Zbtb7c	Kcnu1	Sgo1
Tbc1d8	Kcnq1	Rab38
Pif1	Napsa	Pdia5
Hmgcl	Kif4	Skida1
Abcc8	Klf3	Zfp518a
Nthl1	Krt4	Ndc1
Gramd1b	Lag3	Zfp493
Rpl10a	Lama1	Cenpv
Olfm2	Lamc2	Tm7sf2
Sgsm3	Lrp5	Zfp763
Ppp2r5d	Lrrn1	1700094D03Rik
Zfp40	Ltk	Rec114
Tdrkh	Epcam	Tex19.1
Map3k4	Mesp2	Ndufaf7
Mpzl2	Cxcl9	Dppa2
Tnfrsf13c	Mmp15	Haus7
Gng13	Mras	Fcho1
E130311K13Rik	Msi1	Nphp3
Noxo1	Mthfd2	Paqr5
Catsperd	Mybl2	Npl
Gm1070	Mybpc3	Dmgdh
Ttll1	Nid2	Cyp2s1
Wscd1	Nkx2-5	Gtsf1
Gm38396	Nlk	Ccdc3
Gm7072	Nos1	Mterf2
Ankrd46	Nos3	Lrrc2
Supt20	Npas2	Mei1
Slc9b1	Npr1	Myo18b
Slc38a4	Ntrk3	Hsf2bp
Armh4	P2rx1	Scara5
Fam241b	Pde8a	Terb2
Fam161b	Padi2	Efhc2
Cfap300	Pdx1	Cfap20dc
Brd8dc	Pfkfb1	Sohlh2
Vpreb3	Pla2g2c	Taf7l
Elfn2	Phox2a	Cep72
Septin3	Pola1	Stpg3
Gnaz	Ppl	Pck2
Zfp14	Ptpn20	Elovl7
Relt	Rfx2	Nkx6-3
Usp17lb	Rpl12	Tmem81
Usp11	Rpl28	Drc3
Hap1	Ryr1	Tdrd9
Coprs	Stmn3	Wbp2nl
Cmklr1	Selenbp1	Kbtbd11
Slc2a4	Slc1a1	Parpbp
Fbxo48	Slc1a5	Mettl5
Stx1a	Sox1	Tti1
Svop	Sox15	Pibf1
Mlxipl	Stra8	Dusp9
Zfp449	Syngr1	Tm4sf5
Pip4k2c	Tacr2	Iqcd
Afg1l	Hnf1a	Adad2
Nupr1l	Tex9	Cdyl2
Rtkn2	Tgm2	4930447C04Rik
Tpd52l1	Thrsp	Wdr64
Klhdc8b	Tlx2	Hormad2
Fam229b	Tnni3	Tcam1
Tmem108	Tuba3a	0610040J01Rik
Tmem19	Tuba3b	Clybl
Mtus2	Ucp1	Atp11b
Pbld1	Vdr	Tgds
Mcam	Slc32a1	Pcolce2
8030474K03Rik	Vil1	Ly6k
Lrp11	Wnt10a	Fahd2a
Stac3	Wnt3a	Plet1
Adgrb1	Wnt6	Tmem101
Hscb	Zfp101	2410137M14Rik
Hps4	Trim25	Rpl18a
Lcorl	Zfp42	Nubpl
Zc3h13	Zfp61	Hyls1
Elapor2	Zic3	Fam81a
Slc7a4	Zik1	Mettl15
Sh3tc1	Chrnb2	Rnf225
Samd8	Adcy1	Arxes2
Hnrnpa3	Parp2	Ticrr
Spag1	Adra2b	Tstd3
Klhl8	Alox12b	Gabpb2
Zfp512	Apoa1	9430038I01Rik
Ppp2r2c	Apob	C330018D20Rik
Ccdc60	Apobec2	Stk31
Ccdc158	Aqp5	Spns3
Dis3	Atp1b1	Prelid2
Ap5m1	Akr1b7	Pramel13
Shld2	Cep131	Abcb5
Frmd5	Glb1	Pmch
Polg	Chic1	Ulbp1
Hmgcr	Klf5	Shisal2b
Xrcc1	Aspm	Pigh
Cpne5	Casp14	Ccdc150
Bbs9	Ccnk	Dnajc21
Mbnl2	Entpd2	Snrnp25
Fbxo16	Cdc25c	Acsbg3
Pak5	Cdh4	Efcab11
Rabggta	Cdk5r2	Ak7
Rec8	Cdkn1b	Gins3
Slc22a17	Cdx1	Tspyl4
Dzip1	Cebpg	Misp
Morn2	Celsr1	Spz1
Erg28	Clcn2	Slc19a3
Stard10	Ccr4	H1f1
Zfp235	Col15a1	Gpx2
Caskin1	Col9a3	Cpn1
Zfp799	Cox7a1	Klb
Pidd1	Cpt1b	Mov10l1
H2-DMa	Ptgdr2	Bglap3
Ocln	Cyct	Tex15
Cab39l	Cyp46a1	Pramel1
Tmtc4	Des	Tktl1
Ipo5	Dlx3	Tex13b
Rcbtb1	S1pr4	Usp26
Rplp2	Edn1	Cnnm1
Zfp788	Efna3	Cenpq
Slc12a7	En2	D1Pas1
Rgs14	Epas1	M1ap
Chmp2a	Epha2	Ngfr
Elobl	Ephb3	Peli2
Ccp110	Khdrbs3	Amn
Rprd1a	F2	Uchl4
Msc	Faah	Lmx1a
Sbk1	Fabp3	Spock2
Sil1	Fah	Cox6c
Pla2g2f	Fgf4	Slc15a1
Zfp184	Fzd9	Tcf23
Kif27	Gpd1	Cox4i2
Zfp553	Gjb5	Nat8f2
Gpa33	Gli1	Immp2l
Arhgap26	Gp1ba	Magee2
Gm18905	Grin2c	1700102P08Rik
Gm15246	Haspin	Vmn1r53
Itgae	H2-Q10	Impa2
Prdm9	Hal	Hnrnpa3
Acan	Foxd3	Alpk3
4933427D14Rik	H2ax	Pnpla3
Tdrp	Hoxc13	Tgs1
Slain1	Hrc	Necab2
Hpcal1	Hsd17b1	Rdh1
Dmac2l	Elavl3	Muc4
Tmem63c	Itga2b	Atp6v0a4
Plcd3	Jag2	Smc1b
Zfp248	Kcna7	Tm9sf2
Tmem161b	Kcnab3	Acss1
Pdk2	Kcnh3	Wdr5
Pold2	Kcnk3	Elovl6
Gstp3	Kif11	Gpha2
Tigd3	Kif15	Cyp4f13
Fam234b	Klf12	Nxf7
Gm5165	Klf4	Rtn4ip1
Slc22a21	Lamc1	Parvb
Atad2b	Lat	Cacng6
Gm45871	Lbx1	Rogdi
Lamtor2	Lgals4	Zfp704
Tert	Lgals6	Pdzd3
Otop2	Lhx3	Ripply3
Ercc8	Phyh	Gsx2
Sncb	Matn1	Ppp1r14c
Klhl3	Matn3	Osgep
Plaat3	Mgat3	Qprt
Gm550	Bhlha15	Btbd10
Pigt	Mog	Klk10
Vdac1	Sik1	Metrn
Slc22a5	Ncoa1	Ube2s
Slc34a3	Neb	Hrh3
Duox2	Nfatc2ip	Psph
Acot8	Nfe2l3	Acacb
Camkk1	Nfyb	Itfg2
Dgke	Notch4	Pot1a
Uqcr10	Otx1	Nlrp6
Rnf212	Oxt	Trf
Hmx1	Pax8	Rpp25
Odad4	Padi3	Hemk1
Rasl10a	Padi4	Upb1
Lyrm7	Phkg1	Fig4
Sfi1	Piga	Pnpo
Sp6	Pole2	Slf1
Pdgfa	Pou2f3	Kdelr3
Tbl2	Pou4f1	Nrm
Krtcap3	Ppef2	Abhd3
Rnf43	Prkdc	Yars
Hmgb2	St14	Atp12a
Slc35f3	Prtn3	Slc25a36
Clcn1	Ptprn2	Pou4f2
Wnt7a	Pygm	Clca3b
Ppp1r9a	Rev3l	Ece2
Clpb	Rps18	Kif18a
Ethe1	Rps6ka2	Mllt6
Piwil2	Scnn1a	Slc6a13
Mlycd	Srsf2	Angel1
Acyp1	St6galnac3	Cep85
Colgalt1	St8sia1	Cdkal1
Ppp1r3b	Slc2a3	Spice1
Zfp420	Slc4a1	Dlgap5
Arhgef15	Slc7a5	Hdhd5
Rab44	Snrpc	Ncaph
Mlc1	Sox10	Eppk1
Gnmt	Sox2	Ppp2r5a
Igfals	Sox7	Bpifb5
Camkmt	Star	Gatb
Polh	Stc2	Rad9b
Ppargc1b	Eif1	Tmem45b
Lims2	Sycp1	H3c8
Calb2	Sycp3	Zfp979
Glce	Tbx3	Pomt1
Hmx2	Tbx6	Creb3l3
Tmem59l	Tdgf1	Lactb2
Pex11g	Tie1	Slc44a3
Nudt12	Top2a	Chtf18
Cenpu	Ppp1r13b	Hkdc1
Zfp958	Traip	Ubxn2a
Lrrc29	Trap1a	Oxnad1
Polr1has	Xntrpc	Haus4
Abca2	Tnfrsf4	Shisa2
Katnal2	Zrsr1	Ggact
Fgf22	Lin7b	Pim3
Osr2	Vipr1	Rfc4
Coro6	Vwf	Gca
Rbm26	Zan	Rhov
1700019N19Rik	Mkrn3	Ccm2l
Pcgf5	Zfp59	9430015G10Rik
Sh2d4b	Ikzf3	Tmprss11d
H2-Q2	Adam23	Thumpd1
Pax2	Aloxe3	Cngb1
Arhgef38	Lamc3	Ice2
Arhgef4	Mmp17	Nup43
Dlec1	Nt5e	Obox6
Piwil4	Tenm1	Lctl
Prdm11	Spry4	St8sia6
Grtp1	Vax2	Rell1
Dab1	Clcn6	Fntb
Ermap	Gnpda1	Slc51a
Pnisr	Map3k1	Fanci
Smim41	Mok	Cth
Tor2a	Sema4g	Mtrf1
Trim62	Dpysl4	Ell3
3110040N11Rik	Figla	Tmem82
Ankrd65	Pla2g2e	Krt79
Tle7	Asns	Soat2
Shoc1	Atp1b2	Tfb1m
Iqcn	Btn1a1	Hibch
Gm38999	Clu	Itpka
Gm36210	Cpt1a	Sord
Lsmem2	Epb41l4a	Fam151a
Gm28729	Cdca3	Paip2b
Ccdc188	H2-Ke6	Slc5a11
Gm29776	Hebp1	Neil3
Rnf212b	H3c1	Prss50
Hmcn2	Hmmr	Zfp825
Gm36718	Hspb1	Mettl22
Efcab8	Itgb7	Slc29a4
Gm13420	Muc1	Olfr985
Ankrd31	Mx2	Foxn4
Zscan30	Nodal	Ly6g5b
Sptbn5	Ppp1cc	Serpinb6c
Emid1	Sema5b	Chrnb4
Trpv3	Sptb	Ly6g5c
Ly6g6d	Plek2	E2f4
Gm21818	Nufip1	Asb16
Pzp	Pald1	Osbpl10
Abca4	Mmel1	Cdc5l
Acads	Abcc2	Unc5cl
Acvr1b	Dnah8	Zfp472
Gpr182	Ly75	Hus1b
Adra2c	Sfrp1	Rtp3
Adrb1	Hdgfl3	Zfp352
Adrb2	Meltf	Padi6
Adssl1	Hey2	Cadm4
Nr0b1	Fbxl6	Mmrn2
Akp3	Zfp354c	Atp10d
Alppl2	Chrna4	Csrnp2
Amh	Galnt3	Dock3
Aplp1	Gbx1	Trpm6
Aqp7	Slit1	Rhobtb2
Ass1	Dkkl1	Tcstv3
Atp2a1	Icosl	Dnajb13
Atp7b	Dmrt1	Pms1
Bard1	Crym	Prkag3
Barx1	Il27ra	Acap1
Opn1sw	Clasrp	Acsf2
Hrk	Zscan12	Rps15a
Bik	Comp	Scgb3a1
Bmp6	Aqp3	Cntf
Bmp7	Prkn	Dio3
Bmp8b	Auh	Ccnb1
Car8	Neu3	Zfp536
Car4	Uchl3	2810021J22Rik
Car5a	Chst3	Abraxas1
Cckbr	Rbm3	Clic6
Ccnb2	Irf6	Tmc7
Ccnf	Ppp1r3c	Slc38a5
Cd3e	Fkbp1b	Efhb
Cd79a	Acsm3	A730008H23Rik
Cd9	Spint1	She
Cdk1	Fanca	Aldh5a1
Cdh15	Hmgn2	Ybey
Cdh6	Stag3	Papolg
Chek1	Phgdh	Cntrob
Chga	Olig1	Tada2a
Ovgp1	Rpl5	Mis18bp1
Chrm4	Spag5	Itpk1
Cidea	Septin1	Mier3
Ckm	Zfp316	Arl15
Clcn3	Akap8l	Clic5
Col9a2	Rpl36	Sh3tc2
Cort	Golga4	Dars2
Cox5a	Wbp4	Adap1
Cox6a1	Sfrp5	Fgd5
Cox8a	Syt7	Elmo3
Cplx1	Hs3st3b1	Slfn9
Cpox	Nup210	Ppwd1
Cryga	Apom	Ccdc14
Cyp26a1	Slc1a4	Dact2
Dcc	Pgam2	Kank4
Dhcr7	Tmem131	Cdcp2
Dhh	Srcin1	Tmem132d
Dffb	Nprl2	Fry
Mpp3	Mia	Slc13a4
Dlx4	Egfl6	Kirrel2
Drd4	Prx	Hydin
[truncated: 2,045 more rows]

## Sheet: Extended Data Fig.6d
Extended Data Fig.6d：Split violin plots representing the log10 (RPKM+0.1) for transcripts of genes in LA/LB1 LADs and non-LADs in RNA-seq datasets of control, CBS OE and CTH OE mESCs
SYMBOL	RPKM_Ctrl	RPKM_CTH_OE	LaminA_LADs	LaminB1_LADs	LA/LB1 LADs		SYMBOL	RPKM_Ctrl	RPKM_CBS_OE	LaminA_LADs	LaminB1_LADs	LA/LB1 LADs
Fbxo41	0.0520107	0.346108	NO	NO	NO		Fbxo41	0.0520107	0.164858	NO	NO	NO
Taf9b	0.815123	1.88173	NO	NO	NO		Zfp456	0.268953	0.481141	NO	NO	NO
Primpol	2.16774	4.57615	NO	NO	NO		Slc35d2	1.2229	3.20685	NO	NO	NO
Zfp456	0.268953	0.491633	NO	NO	NO		Plekha8	1.80376	3.11573	NO	NO	NO
Thnsl1	1.35467	2.18981	NO	NO	NO		Usp17ld	0.0556875	0.533385	Yes	Yes	Yes
Slc35d2	1.2229	3.21473	NO	NO	NO		Prss48	0.0255805	0.201506	NO	NO	NO
Plekha8	1.80376	3.70376	NO	NO	NO		Rtel1	10.7662	19.4478	NO	NO	NO
Ttyh1	2.07655	3.47264	NO	NO	NO		Nol4l	1.25721	2.00363	NO	NO	NO
Sohlh1	0.0240644	0.211215	NO	NO	NO		Zfp948	1.76331	3.73795	Yes	Yes	Yes
Nol4l	1.25721	4.27349	NO	NO	NO		Kcnq2	0.196305	0.527727	NO	NO	NO
Panx2	0.0384712	0.205299	NO	NO	NO		Kcnq2	0.187049	0.51478	NO	NO	NO
Tdrd1	0.286803	0.601167	NO	NO	NO		Masp2	4.59054	7.9256	NO	NO	NO
Pram1	0.253385	1.01245	NO	NO	NO		Kdm2b	6.0054	10.0971	NO	NO	NO
Kcnq2	0.196305	0.673171	NO	NO	NO		Zfp619	0.458141	0.872969	NO	NO	NO
Mars1	27.6567	56.4253	NO	NO	NO		Slc13a5	0.289337	4.28751	NO	NO	NO
Senp7	1.20815	2.19406	Yes	Yes	Yes		AU018091	16.9404	48.9791	NO	NO	NO
Zfp619	0.458141	0.839415	NO	NO	NO		9930012K11Rik	0.926939	1.90928	NO	NO	NO
Ckap2	19.4068	33.0534	NO	NO	NO		Sgpp2	0.03517	0.138865	NO	NO	NO
Slc13a5	0.289337	4.4859	NO	NO	NO		Slc28a1	2.03106	3.34675	NO	NO	NO
AU018091	16.9404	51.9634	NO	NO	NO		Rexo5	1.01291	1.87426	NO	Yes	NO
9930012K11Rik	0.926939	1.75294	NO	NO	NO		Zfp560	0.225673	0.624287	Yes	Yes	Yes
Scarf1	0.384791	1.39008	NO	NO	NO		Cntnap2	0.237251	0.779172	Yes	Yes	Yes
Celsr2	0.67284	1.19359	NO	NO	NO		Pla2g4c	0.157754	1.01157	Yes	Yes	Yes
Whamm	3.12074	6.69725	NO	NO	NO		Ypel2	1.21624	1.96876	NO	NO	NO
Rexo5	1.01291	3.24794	NO	Yes	NO		Mreg	13.7382	39.2311	NO	NO	NO
Zfp560	0.225673	0.425379	Yes	Yes	Yes		Zcwpw1	3.64178	14.2541	NO	NO	NO
Amigo1	0.736492	1.3943	NO	NO	NO		Rsrc2	16.6074	27.1892	NO	NO	NO
Gprasp1	5.5203	9.11936	NO	NO	NO		Itgb4	1.03608	1.86142	NO	NO	NO
Asap2	2.82012	5.9581	NO	NO	NO		Zfp69	0.855535	1.70666	NO	NO	NO
Scube3	1.2764	3.46906	NO	NO	NO		Kcnq2	0.19866	0.518142	NO	NO	NO
Tacc2	5.9436	10.1622	NO	NO	NO		Kcnq2	0.192986	0.53112	NO	NO	NO
Pla2g4c	0.157754	1.34093	Yes	Yes	Yes		Kcnq2	0.187016	0.507436	NO	NO	NO
Ypel2	1.21624	2.12746	NO	NO	NO		Phactr3	0.0587739	0.178201	NO	NO	NO
Sp9	0.0974433	0.270631	NO	NO	NO		Slc7a6os	9.09119	14.8611	NO	NO	NO
Ppp1r26	0.575125	0.927413	NO	NO	NO		Maneal	1.29455	2.07279	NO	NO	NO
Mreg	13.7382	30.4469	NO	NO	NO		Btbd8	0.31728	0.5357	NO	NO	NO
Zcwpw1	3.64178	17.3113	NO	NO	NO		Pramel20	0.0143822	0.66778	Yes	Yes	Yes
Rsrc2	16.6074	28.8242	NO	NO	NO		Cdsn	0.549125	0.913723	NO	NO	NO
Itgb4	1.03608	4.57016	NO	NO	NO		Zfp975	0.301666	0.551375	NO	NO	NO
Zfp69	0.855535	1.74339	NO	NO	NO		Zfp760	0.591774	1.04122	NO	Yes	NO
Phactr3	0.0587739	0.175883	NO	NO	NO		Adora1	0.143596	0.352124	NO	NO	NO
Adam22	0.521795	1.21829	Yes	Yes	Yes		Whrn	1.90684	3.32108	NO	NO	NO
Zdhhc23	0.570489	1.05318	NO	NO	NO		Whrn	1.91868	3.33995	NO	NO	NO
Rffl	4.0541	6.91292	NO	NO	NO		Whrn	1.92092	3.34053	NO	NO	NO
Slc25a42	0.962294	2.97337	NO	NO	NO		Naaladl1	0.55101	0.964025	NO	NO	NO
Btbd8	0.31728	0.856974	NO	NO	NO		Slc38a8	0.0348981	0.241854	NO	NO	NO
Tceanc	0.311765	0.684309	NO	NO	NO		Cep44	4.1359	7.59141	Yes	Yes	Yes
Rtn1	1.5629	2.97984	NO	NO	NO		Mdc1	16.8857	29.8113	NO	NO	NO
Zfp975	0.301666	0.586839	NO	NO	NO		Hrh2	0.0397898	0.175627	NO	NO	NO
Zfp760	0.591774	1.55102	NO	Yes	NO		Birc5	12.1685	23.4773	NO	NO	NO
Whrn	1.90684	8.08938	NO	NO	NO		Mdk	44.9325	75.4112	NO	NO	NO
Naaladl1	0.55101	3.12352	NO	NO	NO		Mdk	45.0531	75.6023	NO	NO	NO
Unc13d	0.941392	1.51698	NO	NO	NO		Nrp	1.60056	2.64227	NO	NO	NO
Slc38a8	0.0348981	0.26873	NO	NO	NO		Tmprss13	0.103449	0.265041	NO	NO	NO
Cep44	4.1359	8.52943	Yes	Yes	Yes		Arhgef39	1.76985	3.46845	NO	NO	NO
Mdc1	16.8857	37.0356	NO	NO	NO		Rsad1	0.4722	0.823388	NO	NO	NO
Xkr7	0.0853073	0.442749	NO	NO	NO		Ric8b	3.78621	6.50679	NO	NO	NO
Birc5	12.1685	19.5479	NO	NO	NO		Trim6	15.0622	24.8026	NO	NO	NO
Mdk	44.9325	80.7742	NO	NO	NO		Zfp57	53.4056	162.521	NO	NO	NO
Hs3st6	0.181367	0.739309	NO	NO	NO		Zscan4c	0.112645	1.61749	Yes	NO	NO
Acd	10.7077	22.7949	NO	NO	NO		Capn11	0.142319	0.46759	NO	NO	NO
Smim19	3.13676	5.39538	NO	NO	NO		Ccdc92b	1.49086	2.98854	NO	NO	NO
Zfp787	3.22641	5.80413	NO	NO	NO		Fam169b	0.543726	0.979778	NO	NO	NO
Odf3b	0.195929	0.781708	NO	NO	NO		Eif1ad7	0.0495371	0.457446	Yes	Yes	Yes
Tmem263	2.56145	4.1422	NO	NO	NO		Zfp985	3.53886	6.96071	NO	NO	NO
Ctc1	17.6593	37.6342	NO	NO	NO		Espl1	13.4135	24.2639	NO	NO	NO
Npcd	2.81497	7.19857	NO	NO	NO		Zfyve28	0.667765	1.76873	NO	NO	NO
Nrp	1.60056	4.13778	NO	NO	NO		E130308A19Rik	2.2951	4.02154	NO	NO	NO
Arhgef39	1.76985	4.67422	NO	NO	NO		Cox17	28.3423	50.393	NO	NO	NO
Uspl1	15.2303	24.9586	NO	NO	NO		Kbtbd7	1.03522	2.10044	NO	NO	NO
Grm4	0.0611921	1.30011	NO	NO	NO		Nxf3	0.061389	0.218056	NO	NO	NO
Rasl10b	0.433285	1.67383	NO	NO	NO		Pla2g4f	0.176381	0.463911	NO	NO	NO
Ercc6l2	4.00478	6.72165	NO	NO	NO		Zfp873	0.436898	0.8216	NO	NO	NO
Ddn	0.0107126	0.145767	NO	NO	NO		Carmil3	0.177863	0.377589	NO	NO	NO
Zfp57	53.4056	223.6	NO	NO	NO		Mctp2	0.758684	1.44653	Yes	Yes	Yes
Tmem151b	0.825955	1.52279	NO	NO	NO		Apol7b	0	0.12343	NO	NO	NO
Lingo3	0.493132	1.09979	NO	NO	NO		Rhox10	0.132146	1.85449	NO	NO	NO
Capn11	0.142319	0.638947	NO	NO	NO		Timm9	5.86571	11.5622	NO	NO	NO
Ccdc92b	1.49086	5.62195	NO	NO	NO		Timm9	6.71245	13.3566	NO	NO	NO
Zscan26	4.13178	7.56204	NO	NO	NO		Septin10	2.85077	5.81084	NO	NO	NO
Dupd1	0.00899074	0.193523	NO	NO	NO		Septin10	2.73824	5.363	NO	NO	NO
Adgrf3	0.0494679	0.199525	NO	NO	NO		Zfp563	0.178622	0.348492	NO	NO	NO
Zmynd12	0.0271526	0.204065	NO	NO	NO		Arl14ep	3.85718	7.81171	NO	NO	NO
Espl1	13.4135	22.8068	NO	NO	NO		Zfp78	0.128592	0.308677	NO	NO	NO
Zfyve28	0.667765	3.38681	NO	NO	NO		Orc2	18.937	30.3287	NO	NO	NO
Rap1gap2	1.66369	3.2358	NO	NO	NO		Dmbx1	0.0941358	0.929043	NO	NO	NO
E130308A19Rik	2.2951	4.42771	NO	NO	NO		Unc13a	0.538458	0.970455	NO	NO	NO
Zdhhc18	15.7627	26.2996	NO	NO	NO		Lonrf2	0.0574857	0.273868	NO	NO	NO
Izumo1	0.103363	0.680631	NO	NO	NO		Zswim5	0.911738	1.45996	NO	NO	NO
Trim15	0.0879121	0.337218	NO	NO	NO		Trim38	0.0137884	0.154544	NO	NO	NO
Kbtbd7	1.03522	2.22374	NO	NO	NO		Kcp	0.447258	1.12911	NO	NO	NO
Gpr139	0.0105733	0.140906	Yes	Yes	Yes		Pecam1	3.5253	9.83336	NO	NO	NO
Fbxo10	1.45748	2.85361	NO	NO	NO		Rnf17	3.53509	7.1986	NO	NO	NO
Pla2g4f	0.176381	0.58786	NO	NO	NO		Ntrk1	0.0905232	0.343467	NO	NO	NO
Bcat1	16.0264	29.5935	NO	NO	NO		Commd6	7.52417	15.8775	NO	NO	NO
Rabl6	15.8157	29.5263	NO	NO	NO		Ecscr	2.66145	5.37785	NO	NO	NO
Zfp873	0.436898	0.923937	NO	NO	NO		Selenoh	37.2253	64.6867	NO	NO	NO
Carmil3	0.177863	0.738152	NO	NO	NO		Naa11	1.56938	2.67639	Yes	NO	NO
Lrp3	0.916584	1.71966	NO	NO	NO		AU015228	0.109203	0.418169	NO	NO	NO
Rhox10	0.132146	1.01349	NO	NO	NO		Pls1	1.25175	2.77795	NO	NO	NO
Septin10	2.85077	5.65848	NO	NO	NO		Ezhip	0.270997	2.46732	Yes	Yes	Yes
N4bp2	4.27216	7.55465	NO	NO	NO		Cln5	15.9858	26.0302	NO	NO	NO
Rbfox3	0.166405	0.717059	NO	NO	NO		Fancd2	5.80657	11.7636	NO	NO	NO
Zfp563	0.178622	0.416859	NO	NO	NO		Pak6	0.413827	0.701631	NO	NO	NO
Pbx4	1.13933	2.85989	NO	NO	NO		Stox1	0.0732178	0.236613	NO	NO	NO
Arl14ep	3.85718	10.9176	NO	NO	NO		Agap2	0.153934	0.315502	NO	NO	NO
Trp53i11	6.74262	25.676	NO	NO	NO		Gls2	4.04244	7.17075	NO	NO	NO
Sox6	0.0214743	0.126437	Yes	Yes	Yes		Gm525	0.0171528	0.537772	NO	NO	NO
Dmbx1	0.0941358	1.14379	NO	NO	NO		Cryzl2	1.42254	2.4176	NO	Yes	NO
Unc13a	0.538458	1.89289	NO	NO	NO		Sbspon	0.169894	0.386131	NO	NO	NO
Nova2	0.524237	1.52619	NO	NO	NO		Zfp217	5.21285	8.43388	NO	NO	NO
Lonrf2	0.0574857	0.337643	NO	NO	NO		Myrfl	0.0358843	0.245087	NO	NO	NO
Zswim5	0.911738	1.70015	NO	NO	NO		Abcc4	12.3039	26.4954	NO	NO	NO
Kcp	0.447258	2.36506	NO	NO	NO		Rimbp3	0.133934	0.260675	NO	NO	NO
Pecam1	3.5253	20.6105	NO	NO	NO		D430041D05Rik	0.0231405	0.0810315	NO	NO	NO
Lrrc14b	0.524925	1.21666	NO	NO	NO		Iqsec3	0.00449997	0.0596304	NO	NO	NO
Rnf17	3.53509	8.46257	NO	NO	NO		Zfp568	13.3081	23.4661	NO	NO	NO
Ntrk1	0.0905232	0.700822	NO	NO	NO		Pgr15l	0.020727	0.0854213	Yes	Yes	Yes
Bbs1	0.529275	1.25737	NO	NO	NO		Mucl3	0.11026	0.34673	NO	NO	NO
Commd6	7.52417	18.3534	NO	NO	NO		Treml2	0.254151	1.50828	NO	NO	NO
Rmdn3	8.30274	13.8644	NO	NO	NO		Rbm44	0.28624	1.13952	NO	NO	NO
Shcbp1l	0.206207	1.07884	NO	NO	NO		Rnf224	0.0198425	0.152693	NO	NO	NO
2510002D24Rik	2.17359	4.45245	NO	NO	NO		Ceacam16	0.710013	1.40277	NO	NO	NO
Cln6	7.99531	13.2461	NO	NO	NO		Trim75	0.0201824	0.230248	NO	NO	NO
Tmem181a	1.09664	3.35483	NO	NO	NO		Arl14epl	1.16555	3.98445	NO	NO	NO
Skap1	0.0789262	0.369665	NO	NO	NO		Accsl	1.66166	3.7746	NO	NO	NO
C77080	16.4217	31.4441	NO	NO	NO		Cracr2a	0.0911265	0.280314	NO	NO	NO
Pls1	1.25175	3.15491	NO	NO	NO		Bclaf3	5.06689	8.70994	NO	NO	NO
Ezhip	0.270997	2.44645	Yes	Yes	Yes		Iqgap3	5.00347	8.95125	NO	NO	NO
Ttc7b	7.06344	14.7204	NO	NO	NO		Mfsd2b	0.149601	0.527624	NO	NO	NO
AU021092	0.0298041	0.232763	NO	NO	NO		Mageb4	0.00411638	0.290676	Yes	Yes	Yes
Trim40	0.00927207	0.325748	NO	NO	NO		Bex6	0.0106684	0.312383	NO	NO	NO
Cln5	15.9858	27.8844	NO	NO	NO		Slc47a2	0.0604948	0.320417	NO	NO	NO
Fancd2	5.80657	12.4608	NO	NO	NO		Acsl6	0.515093	1.94051	NO	NO	NO
Zfp583	0.712804	1.41976	NO	NO	NO		Acsl6	0.521384	1.92309	NO	NO	NO
Lemd1	0.216086	0.688231	NO	NO	NO		Acsl6	0.482242	1.81676	NO	NO	NO
Pak6	0.413827	0.99606	NO	NO	NO		Prex2	0.546865	1.18282	NO	Yes	NO
Spata5l1	1.98567	3.57065	NO	NO	NO		Crxos	0.120051	0.639809	NO	NO	NO
Phactr2	0.760328	1.33567	Yes	Yes	Yes		Pramel17	0.0153171	0.258467	Yes	Yes	Yes
Arfgef3	0.200562	0.344527	NO	NO	NO		Ubtfl1	0.0310392	0.423853	Yes	Yes	Yes
Mcu	4.4167	8.24635	NO	NO	NO		Adamts17	0.0469468	0.12519	NO	NO	NO
Zfc3h1	4.17857	7.16193	NO	NO	NO		Thnsl2	0.697505	1.62195	NO	NO	NO
Agap2	0.153934	0.412282	NO	NO	NO		Calca	0.951883	5.82906	Yes	Yes	Yes
Gls2	4.04244	7.77245	NO	NO	NO		7420426K07Rik	0	0.104651	NO	NO	NO
Slc4a7	4.62022	8.40365	NO	Yes	NO		Tnfsfm13	2.12894	3.87233	NO	NO	NO
Cryzl2	1.42254	2.94168	NO	Yes	NO		Pramel31	0.121558	1.1007	NO	NO	NO
Slc30a10	0.0466642	0.20619	NO	NO	NO		Tdpoz8	0	0.224919	NO	Yes	NO
Sbspon	0.169894	0.615432	NO	NO	NO		Tlcd5	0.313758	0.627924	NO	NO	NO
Ciart	4.19714	8.21013	NO	NO	NO		Mrgprx2	0	0.0496713	Yes	Yes	Yes
Cox18	11.9274	20.9978	NO	NO	NO		Ldc1	0	0.0720939	NO	NO	NO
Vsig10	2.04977	3.70017	NO	NO	NO		Dnai2	0.233047	1.3487	NO	NO	NO
Ccdc61	4.72047	12.6191	NO	NO	NO		Kbtbd6	0.43446	1.38851	NO	NO	NO
Myrfl	0.0358843	0.155606	NO	NO	NO		Zfp936	1.86601	4.08102	NO	NO	NO
Abcc4	12.3039	31.1519	NO	NO	NO		Tmem92	0.132757	2.02757	NO	NO	NO
Cdc42bpg	7.67444	13.9286	NO	NO	NO		Zfp345	0.39778	0.72017	NO	NO	NO
Sec31b	0.228988	1.2091	NO	NO	NO		Mansc4	0.0902611	0.391301	NO	NO	NO
D430041D05Rik	0.0231405	0.141331	NO	NO	NO		Golm1	15.7771	25.2886	NO	NO	NO
Zfp568	13.3081	27.9093	NO	NO	NO		Setd6	7.37953	13.578	NO	NO	NO
Ntn5	0.171883	0.503032	NO	NO	NO		Atp2b2	0.0180862	0.122114	NO	NO	NO
Dcp1b	1.56911	3.1066	NO	NO	NO		Selenoh	33.9763	59.5195	NO	NO	NO
Treml2	0.254151	1.63823	NO	NO	NO		Xaf1	17.6761	38.2474	NO	NO	NO
Rbm44	0.28624	1.27777	NO	NO	NO		Strip2	0.0619321	0.251727	NO	NO	NO
Lgr6	0.591332	1.28129	NO	NO	NO		Timm8a2	0.155329	2.04492	NO	NO	NO
Rnf224	0.0198425	0.152076	NO	NO	NO		Ripply1	1.30977	2.50839	NO	NO	NO
Ceacam16	0.710013	1.54874	NO	NO	NO		BC147527	0.0312714	0.204126	NO	NO	NO
Tmem102	1.39354	2.75231	NO	NO	NO		Wdr93	0.179975	0.521001	NO	NO	NO
Lrch1	2.99267	8.16761	NO	NO	NO		Deptor	1.73086	2.93859	NO	NO	NO
Cdkl4	0.0947491	0.311267	NO	NO	NO		Cldn19	0.0235459	0.511814	NO	NO	NO
Garem1	2.15203	3.97676	NO	Yes	NO		Mapt	0.446966	4.88905	NO	NO	NO
Drc1	0.332945	0.851483	NO	NO	NO		Ric3	0.613023	1.56308	Yes	Yes	Yes
Spef1l	0.237274	0.737876	NO	NO	NO		Stk35	6.24852	11.7118	NO	NO	NO
Bclaf3	5.06689	12.9513	NO	NO	NO		Zfp953	0.421525	0.826286	NO	NO	NO
Iqgap3	5.00347	11.9352	NO	NO	NO		Elavl4	0.172564	0.36366	Yes	Yes	Yes
BC048644	0.0136216	0.162085	NO	NO	NO		Tmod2	0.391659	0.639602	NO	NO	NO
Mfsd2b	0.149601	1.80847	NO	NO	NO		Klk13	0.198572	1.51581	NO	NO	NO
Mageb4	0.00411638	0.137858	Yes	Yes	Yes		Trim63	0.660315	1.87437	NO	NO	NO
AW554918	1.12018	2.23011	NO	Yes	NO		Cox8c	0.0417917	0.585779	NO	Yes	NO
Tnfaip8l3	0.10078	0.470378	NO	NO	NO		Prkcz	0.815462	1.55394	NO	NO	NO
Pgap3	1.42869	2.92279	NO	NO	NO		Mrpl1	6.33252	10.2869	NO	Yes	NO
Slc47a2	0.0604948	0.462473	NO	NO	NO		Trpm1	0.110745	0.900593	NO	NO	NO
Acsl6	0.515093	2.7697	NO	NO	NO		Hnrnpa1	5.52613	9.17803	NO	NO	NO
Dnah1	0.133961	0.461424	NO	NO	NO		Npr3	0.199235	0.453437	NO	NO	NO
Tmem253	1.1322	2.25128	NO	NO	NO		Ceacam1	1.82426	4.88952	NO	NO	NO
Smagp	16.5159	30.6166	NO	NO	NO		Ceacam1	1.8474	4.95532	NO	NO	NO
Ak8	0.3185	1.17928	NO	NO	NO		Ceacam1	2.00167	5.43606	NO	NO	NO
Adamts17	0.0469468	0.231283	NO	NO	NO		Rreb1	3.20591	6.37818	NO	NO	NO
Thnsl2	0.697505	1.75345	NO	NO	NO		Zfp982	1.41414	2.89821	NO	NO	NO
Calca	0.951883	6.75571	Yes	Yes	Yes		Zfp951	0.386452	1.23175	NO	NO	NO
Asic2	0.0152118	0.228062	NO	Yes	NO		Zfp808	0.668358	1.29571	NO	NO	NO
Limk2	12.9133	21.3741	NO	NO	NO		Kcnj10	0.259759	0.494809	NO	NO	NO
Pramel31	0.121558	0.386679	NO	NO	NO		Catsperz	0.378389	3.96262	NO	NO	NO
Shank1	0.276144	0.827816	NO	NO	NO		Adora1	0.164949	0.407584	NO	NO	NO
Tlcd5	0.313758	1.26784	NO	NO	NO		Gtf2a2	10.1377	19.8289	NO	NO	NO
Pnldc1	4.43377	7.99606	NO	NO	NO		Pigl	5.5019	9.16243	NO	NO	NO
Dnai2	0.233047	2.45844	NO	NO	NO		Myo6	1.21099	2.18521	Yes	Yes	Yes
Zfp936	1.86601	3.41807	NO	NO	NO		Rad54b	3.6306	6.02068	NO	NO	NO
Zfr2	0.33248	0.803879	NO	NO	NO		Glyctk	0.424111	0.916162	NO	NO	NO
Tmem92	0.132757	0.647463	NO	NO	NO		Gm20767	0.0436227	0.960008	NO	NO	NO
Mansc4	0.0902611	0.406945	NO	NO	NO		Tesmin	0.553793	1.089	NO	NO	NO
Golm1	15.7771	29.2164	NO	NO	NO		Mks1	2.59846	4.23229	NO	NO	NO
Setd6	7.37953	18.0274	NO	NO	NO		Sco1	2.14437	3.65369	NO	NO	NO
Atp2b2	0.0180862	0.527136	NO	NO	NO		Tet2	5.34372	16.9606	NO	NO	NO
Agap1	3.05859	4.98401	NO	NO	NO		Tacc3	17.9581	29.3571	NO	NO	NO
Prok2	0.124834	0.499326	NO	NO	NO		Clmn	0.620316	1.2643	NO	NO	NO
Kcnh6	0.461927	0.838397	NO	NO	NO		Rspo4	0.0649964	0.224336	NO	NO	NO
Xaf1	17.6761	63.564	NO	NO	NO		Kntc1	5.66498	13.6131	NO	NO	NO
Arhgef10	1.73571	6.42772	NO	NO	NO		Arrdc4	7.06108	14.0101	Yes	Yes	Yes
Arnt	13.8922	23.3188	NO	NO	NO		Cd74	2.49808	5.50575	NO	NO	NO
Strip2	0.0619321	0.309505	NO	NO	NO		Nusap1	11.7327	22.8425	NO	NO	NO
Gpx4	17.8638	34.8338	NO	NO	NO		Oip5	7.1586	11.4319	NO	NO	NO
Timm8a2	0.155329	0.668118	NO	NO	NO		Fzd5	6.08476	12.0542	NO	NO	NO
Btrc	3.29073	5.49188	NO	NO	NO		Pcdh8	0.111703	0.831761	NO	NO	NO
Sgk3	1.04107	1.76325	NO	NO	NO		Slc22a18	1.43226	2.91254	NO	NO	NO
Wdr93	0.179975	0.864725	NO	NO	NO		Rad17	6.78138	10.7978	NO	NO	NO
Deptor	1.73086	3.65704	NO	NO	NO		Zfp2	1.00704	1.72034	NO	NO	NO
Dusp22	1.05998	1.92103	NO	NO	NO		Zfp2	1.00497	1.71118	NO	NO	NO
Cldn19	0.0235459	0.63929	NO	NO	NO		Zfp2	0.992836	1.70042	NO	NO	NO
Marveld2	0.760986	1.36676	NO	NO	NO		Mef2b	0.857609	2.06653	NO	NO	NO
Mapt	0.446966	6.48878	NO	NO	NO		Prss38	0.0249434	0.211218	NO	NO	NO
Ric3	0.613023	1.42274	Yes	Yes	Yes		Ccnjl	1.09732	2.35338	NO	NO	NO
Stk35	6.24852	11.4331	NO	NO	NO		Tulp2	0.507674	1.4615	NO	NO	NO
Gng2	8.65929	15.6267	NO	NO	NO		Lyrm9	0.492384	0.877167	NO	NO	NO
Tmod2	0.391659	0.914412	NO	NO	NO		Gsta3	0.961176	1.98258	NO	NO	NO
Rnf38	6.15873	10.2607	NO	NO	NO		Scn8a	0.186201	0.37929	NO	NO	NO
Atp8a1	0.898248	1.73284	NO	NO	NO		Tsks	0.088637	0.397368	NO	NO	NO
Kif5a	1.03406	2.87111	NO	NO	NO		Lrba	1.67207	2.81796	Yes	Yes	Yes
Klk13	0.198572	3.78006	NO	NO	NO		Lrba	1.74365	2.93551	Yes	Yes	Yes
Trim63	0.660315	2.03366	NO	NO	NO		Sdhaf3	2.56809	4.97521	Yes	Yes	Yes
Ldb3	0.301287	0.662493	NO	NO	NO		Hnrnph3	7.48714	13.6777	NO	NO	NO
Prkcz	0.815462	2.17948	NO	NO	NO		Brdt	0.0969478	0.590752	NO	NO	NO
Trpm1	0.110745	3.9794	NO	NO	NO		Gsg1	0.0749993	1.32951	NO	NO	NO
Npr3	0.199235	0.498335	NO	NO	NO		Gsg1	0.0665564	1.17067	NO	NO	NO
Rreb1	3.20591	5.6071	NO	NO	NO		Ret	0.209694	0.546376	NO	NO	NO
Aifm2	2.51122	4.26185	NO	NO	NO		Cps1	0.051148	0.172801	Yes	Yes	Yes
Zfhx2	4.63605	14.6152	NO	NO	NO		Rbpj	7.6146	12.6919	NO	NO	NO
Zfp808	0.668358	1.28263	NO	NO	NO		Rbpj	7.76073	12.9657	NO	NO	NO
Kcnd3	0.0198417	0.150347	NO	NO	NO		Tead4	3.51064	9.45425	NO	NO	NO
Kif21b	2.00878	5.55704	NO	NO	NO		Brca2	2.93702	8.19758	NO	NO	NO
Kcnj10	0.259759	1.22674	NO	NO	NO		Etl4	7.93391	13.7705	Yes	Yes	Yes
Catsperz	0.378389	5.1502	NO	NO	NO		Cacna1s	0.0371241	0.725635	NO	NO	NO
Wfdc10	0.177177	0.970724	NO	NO	NO		Cfap91	0.206957	0.624812	NO	NO	NO
Pnkd	7.12889	12.2353	NO	NO	NO		Dock9	3.03376	6.8437	NO	NO	NO
Pigl	5.5019	8.90265	NO	NO	NO		Pdzd2	0.577824	1.42498	NO	NO	NO
Myo6	1.21099	3.73563	Yes	Yes	Yes		Zfp707	1.45792	3.03218	NO	NO	NO
Rad54b	3.6306	7.03694	NO	NO	NO		Dennd3	0.508208	1.09517	NO	NO	NO
Mroh8	0.228779	0.613342	NO	NO	NO		Cubn	0.73054	7.47878	Yes	Yes	Yes
Glyctk	0.424111	0.967161	NO	NO	NO		Lrp2	1.07953	5.33419	NO	Yes	NO
Tesmin	0.553793	1.44748	NO	NO	NO		Gpat2	0.281475	2.98481	NO	NO	NO
Mks1	2.59846	5.91071	NO	NO	NO		Grik3	3.79768	8.27427	NO	NO	NO
Arhgap12	4.64575	8.83637	NO	NO	NO		Aunip	8.23706	14.0471	NO	NO	NO
Zfp606	0.227115	0.564745	NO	Yes	NO		Chrna9	2.02686	4.20727	NO	NO	NO
Sco1	2.14437	3.83339	NO	NO	NO		Ankrd26	1.02672	1.63906	NO	NO	NO
Tet2	5.34372	30.0158	NO	NO	NO		Nccrp1	0.94392	2.42053	NO	NO	NO
Flot2	23.0163	37.5864	NO	NO	NO		Gli2	8.99622	14.5189	NO	NO	NO
Clmn	0.620316	2.73441	NO	NO	NO		Adamts14	1.48756	2.41015	NO	NO	NO
Zfp692	5.86853	11.7591	NO	NO	NO		Cntnap3	0.020841	0.0887775	NO	NO	NO
Rspo4	0.0649964	1.0546	NO	NO	NO		Ogdhl	12.2422	20.177	NO	NO	NO
Uevld	0.538092	1.20659	NO	NO	NO		Dhtkd1	1.95034	5.01388	NO	NO	NO
Kntc1	5.66498	18.463	NO	NO	NO		Kcng1	0.208963	0.540413	NO	NO	NO
Blm	9.10601	15.9871	NO	NO	NO		Prrg3	0.637474	1.15653	NO	NO	NO
Arrdc4	7.06108	16.9328	Yes	Yes	Yes		Ankrd35	0.360821	0.777408	NO	NO	NO
Hbs1l	15.6108	26.7482	NO	NO	NO		Kcnq4	0.0632156	0.246192	NO	NO	NO
Nusap1	11.7327	31.2853	NO	NO	NO		Cyp2b23	0.73849	1.34034	NO	NO	NO
Oip5	7.1586	12.4388	NO	NO	NO		Mdga1	0.323079	0.649937	NO	NO	NO
Fzd5	6.08476	17.7478	NO	NO	NO		Aspg	0.787952	2.72669	NO	NO	NO
Smad7	10.5936	27.2149	NO	NO	NO		Polr3g	11.1196	18.5542	NO	NO	NO
Rbpms	38.4653	73.8511	NO	NO	NO		Adgrf5	0.138232	0.242901	NO	NO	NO
Ilf3	36.77	60.7299	NO	NO	NO		Focad	3.18493	5.50784	Yes	Yes	Yes
Ankdd1b	0.264551	0.536083	NO	NO	NO		Eml5	1.69308	2.77549	NO	Yes	NO
Pcdh8	0.111703	0.717081	NO	NO	NO		Crnn	0.00501161	0.114966	NO	Yes	NO
Slc22a18	1.43226	4.06101	NO	NO	NO		Prdm14	2.48078	5.79691	NO	NO	NO
Sema3b	0.370767	0.792075	NO	NO	NO		Myo1a	0.103975	0.481359	NO	NO	NO
Zfp2	1.00704	2.38973	NO	NO	NO		Tln2	2.60157	4.54702	NO	NO	NO
Zfp41	2.33966	4.01181	NO	NO	NO		Myh13	0.205804	1.08931	NO	NO	NO
Mef2b	0.857609	10.0085	NO	NO	NO		Alg6	1.77409	3.58285	NO	Yes	NO
Mfge8	45.7675	74.3221	NO	NO	NO		Dscaml1	0.0864341	0.211602	NO	NO	NO
Akna	2.93017	5.64212	NO	NO	NO		Tbc1d4	0.280577	0.612329	Yes	Yes	Yes
Proca1	0.516821	1.32775	NO	NO	NO		Ibtk	6.553	10.8969	NO	Yes	NO
Fam83b	0.263714	0.611635	Yes	Yes	Yes		Prr19	1.85326	3.32768	NO	NO	NO
Prss38	0.0249434	0.281717	NO	NO	NO		Arhgef26	1.21577	2.93188	Yes	Yes	Yes
Cep126	0.903953	1.67526	Yes	Yes	Yes		C2cd4b	0.378791	1.98497	NO	NO	NO
Hsf5	0.097127	0.439798	NO	NO	NO		Myo5c	0.759395	1.76159	NO	NO	NO
Ccnjl	1.09732	2.61425	NO	NO	NO		Zkscan2	0.18696	0.526366	NO	NO	NO
Tulp2	0.507674	2.28325	NO	NO	NO		Dnah2	0.0854393	0.212887	NO	NO	NO
Ttc21b	2.44603	4.07274	Yes	Yes	Yes		Dgkh	1.25163	2.9106	NO	NO	NO
Lyrm9	0.492384	1.32744	NO	NO	NO		Adgrd1	0.092608	0.778663	NO	NO	NO
Scn8a	0.186201	1.48079	NO	NO	NO		Cystm1	5.69578	11.4126	NO	NO	NO
Tsks	0.088637	0.99143	NO	NO	NO		Chd5	0.534388	1.05197	NO	NO	NO
Lrba	1.67207	3.95653	Yes	Yes	Yes		Kmt2c	2.27487	4.20484	NO	NO	NO
Shprh	2.1681	4.04237	NO	NO	NO		Ctcfl	0.114382	0.352693	NO	NO	NO
Srsf5	34.4191	64.1732	NO	NO	NO		Tbc1d31	4.23448	7.43799	NO	NO	NO
Hnrnph3	7.48714	21.7623	NO	NO	NO		Adamts3	0.084965	0.184181	Yes	Yes	Yes
Brdt	0.0969478	0.626717	NO	NO	NO		Plb1	0.0635327	0.217945	NO	NO	NO
Med1	11.7258	19.7068	NO	NO	NO		Agmat	0.0881155	0.443184	NO	NO	NO
Uhrf1bp1	3.76812	7.44404	NO	NO	NO		Unc13b	1.41319	2.90113	NO	NO	NO
Ret	0.209694	0.844676	NO	NO	NO		Fndc1	0.133249	0.272879	NO	NO	NO
Ash2l	48.7258	84.2914	NO	NO	NO		Galnt16	0.219322	0.462248	NO	NO	NO
Cdc14a	0.805322	1.78286	NO	NO	NO		Fam184a	0.361807	0.622697	Yes	Yes	Yes
Rapgefl1	0.436285	0.745565	NO	NO	NO		Ccdc15	0.204328	0.52251	NO	NO	NO
Sp2	11.7709	21.0605	NO	NO	NO		Nasp	68.7314	110.899	NO	NO	NO
Tead4	3.51064	10.7139	NO	NO	NO		Camta1	0.909875	2.23279	NO	NO	NO
Ddias	7.69109	17.478	NO	Yes	NO		Ccnd3	60.1905	114.072	NO	NO	NO
Brca2	2.93702	8.19035	NO	NO	NO		Ccnd3	59.5318	112.654	NO	NO	NO
Etl4	7.93391	21.6492	Yes	Yes	Yes		Rgs3	0.137128	0.686169	NO	NO	NO
Cacna1s	0.0371241	0.227604	NO	NO	NO		Fam90a1a	0.0110997	0.13042	NO	NO	NO
Kcnt2	0.0478699	0.239237	Yes	Yes	Yes		Tomt	1.14954	2.32958	NO	NO	NO
Tmem243	5.00722	8.47597	NO	NO	NO		Dnmt3l	29.9955	80.9927	NO	NO	NO
Pde11a	0.0269695	0.136335	Yes	Yes	Yes		Dux	0.00515755	0.100647	Yes	NO	NO
Srgap1	1.26819	2.86576	NO	NO	NO		Clasp2	5.54007	9.46521	NO	NO	NO
Dock9	3.03376	6.99349	NO	NO	NO		Rnf144a	1.08114	1.92466	NO	NO	NO
Slc25a18	0.416885	1.05091	NO	NO	NO		Sh3d19	5.65714	11.8721	NO	NO	NO
Nhs	0.496889	0.924089	Yes	Yes	Yes		Pigyl	10.879	19.4058	NO	NO	NO
Tecpr2	1.47116	2.40726	NO	NO	NO		Spint2	27.4656	62.6693	NO	NO	NO
Pdzd2	0.577824	1.38959	NO	NO	NO		Sdr39u1	4.47468	8.75927	NO	NO	NO
Zfp707	1.45792	3.32798	NO	NO	NO		Lig1	44.4142	96.543	NO	NO	NO
Dennd3	0.508208	1.70887	NO	NO	NO		Pars2	1.25459	2.38826	NO	NO	NO
Rgs11	0.622628	1.51608	NO	NO	NO		Liph	2.57926	4.84753	NO	NO	NO
Sapcd2	2.18502	3.53156	NO	NO	NO		Slc12a8	0.620719	1.51119	NO	NO	NO
Gpat2	0.281475	3.22342	NO	NO	NO		Fetub	1.13187	2.4553	NO	NO	NO
Cep152	1.48618	2.53384	NO	NO	NO		Fetub	1.14079	2.50629	NO	NO	NO
Grik3	3.79768	17.701	NO	NO	NO		Nr3c2	0.0725457	0.20642	Yes	Yes	Yes
Aunip	8.23706	13.2642	NO	NO	NO		Zfp991	0.235189	0.496053	NO	NO	NO
Morn1	0.383183	1.60776	NO	NO	NO		Myh7b	0.301949	0.563068	NO	NO	NO
Ankrd26	1.02672	1.74353	NO	NO	NO		Pramel24	0.0427316	0.413994	Yes	Yes	Yes
Nccrp1	0.94392	4.78349	NO	NO	NO		Cisd3	10.2339	21.2208	NO	NO	NO
Mki67	10.637	20.6197	NO	NO	NO		Zbtb34	1.14445	2.03235	NO	NO	NO
Gli2	8.99622	29.6008	NO	NO	NO		Myom3	0.0348624	0.17677	NO	NO	NO
Adamts14	1.48756	3.53669	NO	NO	NO		Fam131c	1.52952	5.79135	NO	NO	NO
Cntnap3	0.020841	0.150043	NO	NO	NO		Myorg	1.02734	3.64493	NO	NO	NO
Ogdhl	12.2422	21.0831	NO	NO	NO		Pramel19	0.249831	2.09113	NO	NO	NO
Dhtkd1	1.95034	6.14285	NO	NO	NO		Zfp992	0.153911	0.382129	NO	NO	NO
Kcng1	0.208963	0.531407	NO	NO	NO		Slc2a7	0.114981	0.677725	NO	NO	NO
Prrg3	0.637474	1.79251	NO	NO	NO		Tmem235	0.0217483	0.149693	NO	NO	NO
Ankrd35	0.360821	0.921024	NO	NO	NO		Pramel30	0.0116647	0.130741	NO	NO	NO
Kcnq4	0.0632156	0.465686	NO	NO	NO		Tcp11	1.51016	2.53429	NO	NO	NO
Marf1	4.88996	9.65498	NO	NO	NO		Kif26a	1.04265	2.03192	NO	NO	NO
Rap1gap	3.46083	7.50956	NO	NO	NO		Nr1i2	0.00412154	0.0803533	NO	NO	NO
Mdga1	0.323079	2.12456	NO	NO	NO		Ndufa4l2	0.540551	5.35181	NO	NO	NO
Phf21b	1.18713	2.07828	NO	NO	NO		Tox2	0.0668873	0.339224	NO	NO	NO
Aspg	0.787952	5.20019	NO	NO	NO		Pik3c2b	0.415255	1.02339	NO	NO	NO
Lama5	10.7796	25.018	NO	NO	NO		Duox1	0.108512	0.282797	NO	NO	NO
Frmpd1	0.171288	0.344882	NO	NO	NO		Ajap1	0.0295777	0.172623	NO	NO	NO
Kif13b	4.36994	7.79779	NO	NO	NO		Shisal2a	0.475488	1.22464	NO	NO	NO
Focad	3.18493	6.51032	Yes	Yes	Yes		Ctag2l1	0	0.252138	NO	NO	NO
Eml5	1.69308	3.5836	NO	Yes	NO		Myh3	0.119028	0.379074	NO	NO	NO
Hcn4	0.0245405	0.319084	NO	NO	NO		Zscan4d	0.225411	4.38022	Yes	NO	NO
Prdm14	2.48078	6.67012	NO	NO	NO		Bicral	6.27787	13.2965	NO	NO	NO
Myo1a	0.103975	0.551181	NO	NO	NO		Pnma5	1.56162	4.78364	NO	NO	NO
Gpr179	0.0293693	0.11369	NO	NO	NO		Susd5	0.12582	0.357547	NO	NO	NO
Ercc6	1.99469	3.71733	NO	NO	NO		Tmem233	0.0123167	0.139532	NO	NO	NO
Palb2	2.38778	5.1281	NO	NO	NO		Cyp4f40	0.0241244	0.15476	NO	NO	NO
Tln2	2.60157	4.75078	NO	NO	NO		Isoc2a	5.73418	17.6735	NO	NO	NO
Myh13	0.205804	0.832349	NO	NO	NO		Calml4	4.71342	12.3792	NO	NO	NO
Fbxo43	0.0409701	0.241122	NO	NO	NO		Cnnm2	4.8864	10.4203	NO	NO	NO
Kdm3b	13.43	23.6377	NO	NO	NO		Alkbh1	8.02921	12.7745	NO	NO	NO
Alg6	1.77409	3.18252	NO	Yes	NO		Col6a6	0.0332678	0.125727	NO	NO	NO
Dscaml1	0.0864341	0.988713	NO	NO	NO		Kif19a	0.125124	0.336783	NO	NO	NO
Tbc1d4	0.280577	1.12227	Yes	Yes	Yes		Zfp980	0.285365	0.618185	NO	NO	NO
Tmem28	1.35088	3.06058	NO	NO	NO		Lin9	3.04791	4.84993	NO	NO	NO
Mpp7	1.48872	2.83706	Yes	Yes	Yes		Tmc5	0.0609488	0.211143	NO	NO	NO
Fam217b	0.9323	1.97165	NO	NO	NO		Gm11545	0.280651	1.54519	NO	NO	NO
Prr19	1.85326	4.5269	NO	NO	NO		Zfp185	1.54756	3.28684	NO	NO	NO
C2cd4b	0.378791	2.44557	NO	NO	NO		Aqp8	0.0904101	1.18108	NO	NO	NO
Myo5c	0.759395	1.99051	NO	NO	NO		Bach2	0.287214	0.679989	NO	NO	NO
Mphosph9	1.28633	2.24399	NO	NO	NO		C2cd5	5.85157	13.098	NO	NO	NO
Zkscan2	0.18696	1.18542	NO	NO	NO		Cenpw	2.11299	4.308	Yes	NO	NO
Dnah2	0.0854393	0.397356	NO	NO	NO		Trpc2	0.0425323	0.168125	NO	NO	NO
Slc9a5	2.01137	4.3224	NO	NO	NO		Apoc1	8.35826	20.0638	NO	NO	NO
Plekhg4	0.371473	0.769099	NO	NO	NO		Dzip3	1.4772	2.57748	Yes	Yes	Yes
Cul9	0.639069	1.23482	NO	NO	NO		Ppih	1.46316	2.77093	NO	NO	NO
Dgkh	1.25163	7.46348	NO	NO	NO		Cdca2	8.03761	12.8093	NO	NO	NO
Sipa1l2	5.80273	11.2096	NO	NO	NO		Lnpk	1.13314	1.94721	NO	Yes	NO
L3mbtl1	0.0724758	0.309569	NO	NO	NO		Ttk	10.285	17.8519	NO	NO	NO
Scaper	1.34101	2.18837	Yes	Yes	Yes		Zscan4f	0.174293	3.16915	Yes	NO	NO
Adgrd1	0.092608	1.25278	NO	NO	NO		Efcab12	0.466449	0.986317	NO	NO	NO
Chd2	6.95502	12.3882	NO	NO	NO		Pclo	0.0419662	0.171782	Yes	Yes	Yes
Lrrc7	0.0680605	0.119498	Yes	Yes	Yes		Foxp4	29.229	48.7094	NO	NO	NO
Cenpf	3.88234	6.34985	NO	NO	NO		Foxp4	29.3476	48.8538	NO	NO	NO
Cystm1	5.69578	15.5931	NO	NO	NO		Crem	0.994556	1.85754	NO	NO	NO
Vps8	3.05571	5.64764	NO	NO	NO		Crem	1.00322	1.88543	NO	NO	NO
Chd5	0.534388	2.51521	NO	NO	NO		Cdc25b	3.87696	6.28946	NO	NO	NO
Kmt2c	2.27487	5.36513	NO	NO	NO		Uhrf1	25.332	46.8211	NO	NO	NO
Ctcfl	0.114382	0.87607	NO	NO	NO		Uhrf1	24.5941	45.5214	NO	NO	NO
Tbc1d31	4.23448	7.64027	NO	NO	NO		Uhrf1	25.5117	47.1432	NO	NO	NO
Prss33	0.0949094	0.538031	NO	NO	NO		Rad51ap2	0	0.0440872	Yes	Yes	Yes
Plb1	0.0635327	0.179701	NO	NO	NO		Ccnb1ip1	3.23819	5.21368	NO	NO	NO
Unc13b	1.41319	4.10802	NO	NO	NO		Ubap1l	0.25024	1.36488	NO	NO	NO
Galnt16	0.219322	0.585339	NO	NO	NO		Kcnip3	0.582655	1.05193	NO	NO	NO
Rbm24	0.122724	0.319535	NO	NO	NO		Aldh3a1	0.409107	0.928643	NO	NO	NO
Fam184a	0.361807	1.4987	Yes	Yes	Yes		9930012K11Rik	0.928347	1.91219	NO	NO	NO
Ccdc15	0.204328	0.722392	NO	NO	NO		Zfp78	0.131219	0.312549	NO	NO	NO
Ino80d	1.85965	4.68987	NO	NO	NO		Nemp1	1.44669	3.14637	NO	NO	NO
Wdr86	1.48432	2.64789	NO	NO	NO		Xkr5	2.42073	4.00732	NO	NO	NO
Ncam1	1.97437	4.9729	NO	NO	NO		Boll	0.171119	0.486032	Yes	Yes	Yes
Ppp2r5c	20.3387	39.8427	NO	NO	NO		Lifr	2.47146	4.12676	NO	NO	NO
Mettl7a3	0.062745	0.366961	NO	NO	NO		Frrs1	7.77137	13.8412	NO	NO	NO
Camta1	0.909875	3.03258	NO	NO	NO		Itga9	2.27365	3.85339	NO	NO	NO
Ccnd3	60.1905	140.325	NO	NO	NO		Ltbp4	14.5673	29.1232	NO	NO	NO
Rgs3	0.137128	1.78794	NO	NO	NO		Glo1	15.097	24.1027	NO	NO	NO
Neurl1b	0.0550745	0.288146	NO	NO	NO		Cutc	1.0919	2.11966	NO	NO	NO
Klhl34	0.0539478	0.204331	NO	NO	NO		Mtcl1	6.0113	9.91482	NO	NO	NO
Zfp800	1.14686	2.1754	Yes	Yes	Yes		Fam189a2	0.325053	1.32042	NO	NO	NO
Tomt	1.14954	2.73483	NO	NO	NO		Clasp2	5.27354	8.93983	NO	NO	NO
Gnb1l	1.47126	2.6791	NO	NO	NO		Nedd4l	3.02005	5.08787	NO	NO	NO
Clasp2	5.54007	11.0309	NO	NO	NO		Jmjd7	1.92643	3.43684	NO	NO	NO
Rnf144a	1.08114	2.2052	NO	NO	NO		Mfsd4a	0.0157655	0.0998689	NO	NO	NO
Sh3d19	5.65714	12.5943	NO	NO	NO		Tasor	2.57122	4.28153	NO	NO	NO
Pigyl	10.879	20.4654	NO	NO	NO		Kmt5c	18.475	30.9072	NO	NO	NO
Spint2	27.4656	94.4468	NO	NO	NO		H2-M5	2.38103	6.21505	NO	NO	NO
Sdr39u1	4.47468	7.8162	NO	NO	NO		Zbtb44	5.1928	10.1049	NO	NO	NO
Ptpru	0.683997	1.46491	NO	NO	NO		Eif1ad3	0.0526457	0.811692	Yes	Yes	Yes
Lig1	44.4142	79.3351	NO	NO	NO		Kit	6.6912	10.6819	NO	NO	NO
Mboat2	3.21319	5.27413	NO	NO	NO		Faim	6.94086	11.3909	NO	NO	NO
Disp3	0.037737	0.185787	NO	NO	NO		Lepr	0.0260013	0.106689	Yes	Yes	Yes
Pars2	1.25459	2.1332	NO	NO	NO		Rad54l	7.62597	12.7714	NO	NO	NO
Slc12a8	0.620719	1.35412	NO	NO	NO		Rad54l	7.5829	12.7325	NO	NO	NO
Fetub	1.13187	2.76685	NO	NO	NO		Cdc14b	2.55575	5.10501	NO	NO	NO
Nr3c2	0.0725457	0.339399	Yes	Yes	Yes		B3galt5	0	0.0612348	NO	NO	NO
Kdf1	2.17515	6.40863	NO	NO	NO		Eif4a2	24.219	52.293	NO	NO	NO
Oas1b	1.40624	2.90788	NO	NO	NO		Eif4a2	28.9475	60.9898	NO	NO	NO
Tle3	14.5574	34.1887	NO	NO	NO		Pnp2	1.07489	2.11549	NO	NO	NO
Myh7b	0.301949	1.02911	NO	NO	NO		Fam178b	2.45828	4.29131	NO	NO	NO
Cisd3	10.2339	17.1531	NO	NO	NO		Pramel16	0.0340812	0.408765	Yes	Yes	Yes
Ppp1r3d	0.0783823	0.261494	NO	NO	NO		Pramel21	0	0.10323	Yes	Yes	Yes
Zbtb34	1.14445	2.73414	NO	NO	NO		Mroh7	0.0237557	0.166128	NO	NO	NO
Tmem8b	0.682741	1.70783	NO	NO	NO		Zfp534	1.0775	2.93695	NO	NO	NO
Myom3	0.0348624	0.141172	NO	NO	NO		Sirt3	3.61651	5.92034	NO	NO	NO
Fam131c	1.52952	7.81001	NO	NO	NO		Meioc	0.70484	1.97496	NO	NO	NO
Myorg	1.02734	5.82945	NO	NO	NO		Tspan32	0.0964127	0.403608	NO	NO	NO
Slc2a7	0.114981	0.3373	NO	NO	NO		Tspan32	0.0882752	0.409426	NO	NO	NO
Tmem235	0.0217483	0.183093	NO	NO	NO		Tspan32	0.080318	0.380074	NO	NO	NO
Tcp11	1.51016	7.10592	NO	NO	NO		Dock9	2.9126	6.56555	NO	NO	NO
Dennd2d	0.154905	0.343316	Yes	Yes	Yes		Dock9	2.92344	6.58802	NO	NO	NO
Kif26a	1.04265	4.13986	NO	NO	NO		Opn4	0.0397581	0.181226	NO	NO	NO
Zbtb3	0.540328	1.18579	NO	NO	NO		Tm9sf5	0.136208	1.11109	Yes	Yes	Yes
Ndufa4l2	0.540551	30.5002	NO	NO	NO		Hpca	0.918698	2.18075	NO	NO	NO
Tox2	0.0668873	0.770351	NO	NO	NO		Pttg1	34.418	59.0623	NO	NO	NO
Pik3c2b	0.415255	1.49055	NO	NO	NO		Nol4l	1.13951	1.81636	NO	NO	NO
Zfp541	0.0394404	0.124791	NO	NO	NO		Gpr160	0.756411	2.46364	NO	NO	NO
Arhgap44	2.58088	4.62945	NO	NO	NO		Gpr160	0.844467	2.98209	NO	NO	NO
Duox1	0.108512	0.255796	NO	NO	NO		Megf11	0.302402	0.616445	NO	NO	NO
Ajap1	0.0295777	0.142758	NO	NO	NO		Prr23a1	0.0565795	0.685652	NO	NO	NO
Shisal2a	0.475488	2.59799	NO	NO	NO		Iho1	0.293668	1.18349	NO	NO	NO
Tmem35b	1.73979	3.46165	NO	NO	NO		Cntfr	3.57069	11.613	NO	NO	NO
Zkscan16	0.0386578	0.257697	NO	NO	NO		Poli	5.22251	11.6363	NO	NO	NO
Rnf39	0.660079	1.90316	NO	NO	NO		Rbl1	2.37357	4.3375	NO	NO	NO
D3Ertd751e	0.321299	0.668118	Yes	NO	NO		Tpx2	23.6543	43.814	NO	NO	NO
Bicral	6.27787	14.413	NO	NO	NO		Tpx2	23.578	43.6774	NO	NO	NO
Pnma5	1.56162	3.48855	NO	NO	NO		Tpx2	22.6184	41.8489	NO	NO	NO
Prrt4	0.268493	0.969879	NO	NO	NO		Tpx2	23.6371	43.7823	NO	NO	NO
Akap5	0.0989471	0.274502	NO	NO	NO		Gm14124	0.558111	0.916442	NO	NO	NO
Zfp267	1.64228	2.76941	NO	NO	NO		Nemp2	0.816158	2.08263	NO	NO	NO
Clec2l	0.163139	0.689733	NO	NO	NO		Eif4a3l1	0.244692	3.06486	NO	Yes	NO
Susd5	0.12582	1.18429	NO	NO	NO		Zfp949	0.847199	1.46512	NO	NO	NO
Gpr25	0.0150047	0.144184	NO	NO	NO		Syce1	1.90881	9.31558	Yes	Yes	Yes
Tmem233	0.0123167	0.168244	NO	NO	NO		Ppfia4	1.17738	2.79583	NO	NO	NO
Isoc2a	5.73418	20.5301	NO	NO	NO		Gm13889	0.228272	0.815009	NO	NO	NO
Calml4	4.71342	10.1121	NO	NO	NO		Btbd18	0.314958	0.89668	NO	NO	NO
Cnnm2	4.8864	11.1298	NO	NO	NO		Crxos	0.0714653	0.538984	NO	NO	NO
Alkbh1	8.02921	14.1105	NO	NO	NO		Sult6b2	0.0142246	0.20138	NO	NO	NO
Col6a6	0.0332678	0.133745	NO	NO	NO		Kcnt1	0.0217337	0.100548	NO	NO	NO
Kif19a	0.125124	1.15376	NO	NO	NO		Mak	0.270916	0.651212	NO	NO	NO
Ablim1	1.20535	2.17841	NO	NO	NO		Mak	0.260425	0.615873	NO	NO	NO
Brwd1	2.68217	7.17237	NO	NO	NO		Nucks1	15.4692	24.6908	NO	NO	NO
Lin9	3.04791	5.25924	NO	NO	NO		Pak6	0.462008	0.776559	NO	NO	NO
Gm11545	0.280651	0.86026	NO	NO	NO		Lrp4	0.216038	0.519523	NO	NO	NO
Zfp185	1.54756	4.58304	NO	NO	NO		Gm14139	0.886409	1.56424	NO	Yes	NO
Bach2	0.287214	1.65246	NO	NO	NO		Ddx4	1.42281	2.81792	NO	NO	NO
Kazn	5.66222	13.0923	NO	NO	NO		Nat8f4	0.26232	0.867307	NO	NO	NO
C2cd5	5.85157	16.6965	NO	NO	NO		Pianp	4.26287	7.61075	NO	NO	NO
Cenpw	2.11299	4.06135	Yes	NO	NO		Pianp	4.3013	7.68134	NO	NO	NO
Bcan	0.245633	0.924356	NO	NO	NO		Ttc39a	0.41422	0.843508	NO	NO	NO
Cbfa2t3	0.0953017	0.441011	NO	NO	NO		Ndrg2	6.26552	10.5221	NO	NO	NO
Trpc2	0.0425323	0.333862	NO	NO	NO		Als2cl	2.17152	3.81279	NO	NO	NO
Rnft2	0.582156	2.70719	NO	NO	NO		Als2cl	2.14156	3.76934	NO	NO	NO
Mdfi	4.14885	7.49612	NO	NO	NO		Mtss1	14.6627	24.6902	NO	NO	NO
Apoc1	8.35826	32.5904	NO	NO	NO		Msh5	0.125749	0.354992	NO	NO	NO
Dzip3	1.4772	4.18827	Yes	Yes	Yes		Clcnka	0.204328	0.843524	NO	NO	NO
Banp	3.10615	6.45074	NO	NO	NO		Eng	6.52093	10.5202	NO	NO	NO
Cdca2	8.03761	17.1363	NO	NO	NO		Eng	6.35509	10.1745	NO	NO	NO
Inpp5d	15.0553	25.5697	NO	NO	NO		Ezh2	27.5416	50.0499	NO	NO	NO
Yif1b	25.8988	42.9054	NO	NO	NO		Cacnb1	2.23376	3.61333	NO	NO	NO
Lnpk	1.13314	2.39546	NO	Yes	NO		Cacnb1	2.31118	3.88495	NO	NO	NO
Hpn	1.20837	3.33528	NO	NO	NO		Grid2ip	0.0812155	0.205922	NO	NO	NO
Zfp945	0.886387	1.51367	Yes	Yes	Yes		Ube2v2	0.396227	0.800621	NO	Yes	NO
Ttk	10.285	22.4221	NO	NO	NO		Polq	0.841481	1.52454	Yes	Yes	Yes
Zfp426	1.84216	3.10172	NO	NO	NO		Gjc1	16.4412	27.5911	NO	NO	NO
Zscan4f	0.174293	0.477187	Yes	NO	NO		Gjc1	16.5349	27.7292	NO	NO	NO
Dmtf1	10.7194	17.8962	NO	NO	NO		B3gnt5	1.18091	2.61339	NO	NO	NO
Amy1	0.0246019	0.173727	Yes	Yes	Yes		B3gnt5	1.22996	2.70667	NO	NO	NO
Ebf4	0.67402	1.36124	NO	NO	NO		Esrrb	70.3638	140.119	NO	NO	NO
Adam11	0.441383	1.99997	NO	NO	NO		Tnfsfm13	2.13916	3.89928	NO	NO	NO
Pclo	0.0419662	0.113876	Yes	Yes	Yes		Tnfsf13	1.26652	3.45771	NO	NO	NO
Foxp4	29.229	56.242	NO	NO	NO		Grip2	0.0478304	0.15871	NO	NO	NO
Serac1	1.70823	3.58872	NO	NO	NO		Dpp4	0.713722	2.13921	Yes	Yes	Yes
Zfp661	0.873329	2.14882	NO	NO	NO		Sirt1	12.5754	24.2634	NO	NO	NO
Reps1	18.8823	30.9314	NO	NO	NO		Lrrc57	5.66872	10.2178	NO	NO	NO
Cdc25b	3.87696	8.81391	NO	NO	NO		Lrrc57	5.51978	9.9493	NO	NO	NO
Ubap1l	0.25024	4.10106	NO	NO	NO		Lrrc57	5.55258	9.97652	NO	NO	NO
Wdfy1	4.13912	7.78048	NO	NO	NO		Ppp1r16b	0.0604538	0.16198	NO	NO	NO
Kcnip3	0.582655	2.94765	NO	NO	NO		Zfp217	5.23486	8.47215	NO	NO	NO
Tlk2	8.43209	14.441	NO	NO	NO		Hopx	2.09464	5.89073	NO	NO	NO
Arhgef16	2.22088	5.75581	NO	NO	NO		Hopx	1.87478	5.29084	NO	NO	NO
Bub1	10.2324	20.4431	NO	NO	NO		Als2	5.60253	11.291	NO	NO	NO
Nemp1	1.44669	4.56247	NO	NO	NO		Smyd1	0.201236	0.549015	NO	NO	NO
Odf2	27.2527	55.3018	NO	NO	NO		Plekha6	0.680373	1.19414	NO	NO	NO
Xkr5	2.42073	4.03359	NO	NO	NO		Nfasc	0.380002	0.782997	NO	NO	NO
Phf8	4.60786	7.62322	NO	NO	NO		Nfasc	0.378758	0.768218	NO	NO	NO
Boll	0.171119	0.569221	Yes	Yes	Yes		Nfasc	0.372578	0.755625	NO	NO	NO
Fggy	1.41704	3.16591	Yes	Yes	Yes		Grm2	0.12892	0.481547	NO	NO	NO
Frrs1	7.77137	13.6543	NO	NO	NO		Triml2	17.494	44.6972	NO	NO	NO
Ltbp4	14.5673	46.6719	NO	NO	NO		Timd2	0.0127378	0.266809	Yes	Yes	Yes
Stat5b	1.82735	3.39178	NO	NO	NO		Timd2	0.0137298	0.287586	Yes	Yes	Yes
Mtcl1	6.0113	17.3473	NO	NO	NO		Nxt2	2.58805	6.99309	NO	Yes	NO
Syt3	0.850739	1.56685	NO	NO	NO		Dctd	12.3646	22.0138	NO	NO	NO
Fam189a2	0.325053	2.18954	NO	NO	NO		Dctd	13.5891	24.0508	NO	NO	NO
Eml4	11.8659	19.4204	NO	NO	NO		Islr2	0.422622	3.46478	NO	NO	NO
Nedd4l	3.02005	5.94049	NO	NO	NO		Islr2	0.411905	3.35789	NO	NO	NO
Jmjd7	1.92643	5.33746	NO	NO	NO		Islr2	0.410374	3.36416	NO	NO	NO
Mfsd4a	0.0157655	0.114139	NO	NO	NO		Islr2	0.432982	3.54949	NO	NO	NO
Fnbp1l	7.31336	12.4969	NO	NO	NO		Islr2	0.437067	3.58579	NO	NO	NO
Lin54	4.57756	7.74036	NO	NO	NO		Islr2	0.436833	3.57845	NO	NO	NO
Kmt5c	18.475	45.8983	NO	NO	NO		Islr2	0.451809	3.67908	NO	NO	NO
H2-M5	2.38103	4.14832	NO	NO	NO		Cdc45	11.9889	22.6811	NO	NO	NO
Zbtb44	5.1928	11.9411	NO	NO	NO		Tgm1	3.46245	16.654	NO	NO	NO
Fcgbp	0.0522902	0.171377	NO	NO	NO		Tgm1	3.35913	16.1349	NO	NO	NO
Kit	6.6912	17.5095	NO	NO	NO		Tfeb	11.8636	20.7167	NO	NO	NO
Eps15l1	9.39681	15.3148	NO	NO	NO		Tfeb	11.816	20.6466	NO	NO	NO
Fyn	6.0871	11.6666	NO	NO	NO		Gm15455	0.232688	0.760079	NO	NO	NO
Lepr	0.0260013	0.135327	Yes	Yes	Yes		Cblc	1.42058	2.49124	NO	NO	NO
Pla2g5	0.686352	2.86272	NO	NO	NO		Taf7l2	0.0316852	0.150725	Yes	Yes	Yes
Ccnc	3.70362	6.07893	NO	NO	NO		Mgat4c	0.0284539	0.13732	Yes	Yes	Yes
Cdc14b	2.55575	5.83356	NO	NO	NO		Mgat4c	0.0294238	0.142001	Yes	Yes	Yes
Eif4a2	24.219	55.4443	NO	NO	NO		Cysltr2	0.226902	0.603875	NO	NO	NO
Fam178b	2.45828	11.0384	NO	NO	NO		1700012B07Rik	0	0.109688	Yes	Yes	Yes
Trp73	0.530019	0.954951	NO	NO	NO		Fam174b	0.523075	1.06047	NO	NO	NO
Mroh7	0.0237557	0.741241	NO	NO	NO		9330159F19Rik	0.0941386	0.558844	Yes	Yes	Yes
Sirt3	3.61651	9.5849	NO	NO	NO		Stk32c	0.167865	0.614643	NO	NO	NO
Ccn6	0.0217791	0.298675	NO	NO	NO		Nsmce4a	25.8415	43.8269	NO	NO	NO
Meioc	0.70484	3.4509	NO	NO	NO		Syce3	0.511678	1.52412	NO	NO	NO
Sec14l5	0.184783	0.457938	NO	NO	NO		Syce3	0.548556	1.60568	NO	NO	NO
Tspan32	0.0964127	0.34687	NO	NO	NO		Gm3604	0.331058	0.624399	NO	NO	NO
Opn4	0.0397581	0.364543	NO	NO	NO		Susd2	2.19984	7.09379	NO	NO	NO
Tm9sf5	0.136208	0.721788	Yes	Yes	Yes		Pkp3	1.03133	2.59732	NO	NO	NO
Lpin1	4.33109	6.95521	NO	NO	NO		Rmi2	0.768287	1.37622	NO	NO	NO
Hdac6	13.8686	23.6718	NO	NO	NO		Rpl10l	9.21896	34.1428	Yes	NO	NO
Hpca	0.918698	2.26776	NO	NO	NO		Ccdc138	1.88617	3.44692	NO	NO	NO
Rpl35a	11.2703	18.134	NO	NO	NO		Crybg2	0.995348	5.38789	NO	NO	NO
Gfap	0.0192607	0.224557	NO	NO	NO		Megf6	0.126649	0.275037	NO	NO	NO
Gpr160	0.756411	3.07476	NO	NO	NO		Gprasp2	1.2979	2.83832	NO	NO	NO
Megf11	0.302402	1.08766	NO	NO	NO		Gprasp2	1.31099	2.86695	NO	NO	NO
Nxpe3	0.482372	0.999674	NO	NO	NO		Gprasp2	1.31623	2.87842	NO	NO	NO
Prr23a1	0.0565795	0.561768	NO	NO	NO		Adgre5	12.007	24.1498	NO	NO	NO
Iho1	0.293668	1.56414	NO	NO	NO		Adgre5	11.8352	24.451	NO	NO	NO
Ly6h	0.269515	1.52352	NO	NO	NO		Adgre5	12.0315	24.199	NO	NO	NO
Cntfr	3.57069	12.6122	NO	NO	NO		Zfp949	0.82341	1.45613	NO	NO	NO
Cpne6	0.0188049	0.131709	NO	NO	NO		Tchh	0.124586	0.27518	NO	NO	NO
Dpp6	0.0336149	0.299491	NO	NO	NO		Elf3	4.94893	8.71242	NO	NO	NO
Poli	5.22251	11.5789	NO	NO	NO		Tmem92	0.147133	2.13058	NO	NO	NO
Rtkn	5.742	9.66744	NO	NO	NO		Plekhb1	2.36101	5.29303	NO	NO	NO
Gcnt1	1.42189	2.76083	NO	NO	NO		Plekhb1	2.42372	5.37806	NO	NO	NO
Rbl1	2.37357	4.65188	NO	NO	NO		Plekhb1	2.55241	5.67536	NO	NO	NO
Tpx2	23.6543	41.2579	NO	NO	NO		Plekhb1	2.56666	5.70705	NO	NO	NO
Zfp937	0.128152	0.279104	NO	Yes	NO		Plekhb1	2.42354	5.40074	NO	NO	NO
Fbrsl1	7.08172	21.3973	NO	NO	NO		Plekhb1	2.55279	5.70069	NO	NO	NO
Nemp2	0.816158	2.93447	NO	NO	NO		Otud6a	0.0511118	1.15635	NO	NO	NO
Lrrc9	0.132151	0.322759	NO	NO	NO		Fgfr3	0.190228	1.48208	NO	NO	NO
Atat1	4.07236	7.67768	NO	NO	NO		Fgfr3	0.201382	1.58211	NO	NO	NO
Zfp949	0.847199	1.64261	NO	NO	NO		Fgfr3	0.195805	1.47903	NO	NO	NO
Nars	48.4942	92.4063	NO	NO	NO		Birc7	0.0525753	0.382858	NO	NO	NO
Tent5c	0.912093	2.21557	NO	NO	NO		Lpar5	1.7624	3.37858	NO	NO	NO
Syce1	1.90881	6.74533	Yes	Yes	Yes		Lpar5	1.76657	3.38274	NO	NO	NO
Fam13c	1.3249	2.47651	NO	NO	NO		Susd1	0.655332	1.36745	NO	NO	NO
Insyn2a	0.277381	0.687194	NO	Yes	NO		Coq8a	1.81549	3.56215	NO	NO	NO
Ppfia4	1.17738	5.05363	NO	NO	NO		Atp2a3	0.575263	11.4132	NO	NO	NO
Vwa5b2	0.0628632	0.31486	NO	NO	NO		Atp2a3	0.591169	11.5677	NO	NO	NO
Gm13889	0.228272	3.63332	NO	NO	NO		Fignl1	8.2091	17.2177	NO	NO	NO
Btbd18	0.314958	1.41173	NO	NO	NO		Fignl1	8.56788	17.9546	NO	NO	NO
Kcnt1	0.0217337	0.506623	NO	NO	NO		4930579F01Rik	0.0176888	0.277956	NO	NO	NO
Lrrc74b	0.023744	0.149969	NO	NO	NO		4930579F01Rik	0.00621086	0.14805	NO	NO	NO
Mak	0.270916	2.23471	NO	NO	NO		Elavl4	0.180999	0.384276	Yes	Yes	Yes
Lrp4	0.216038	0.490146	NO	NO	NO		Elavl4	0.168105	0.353796	Yes	Yes	Yes
Adtrp	0.0284157	0.178614	NO	NO	NO		Pradc1	3.83927	7.05669	NO	NO	NO
Zfp212	2.78644	4.87622	NO	NO	NO		Mttp	0.529791	1.22349	NO	NO	NO
Ddx4	1.42281	5.18362	NO	NO	NO		Rhpn1	0.711518	1.57665	NO	NO	NO
Gse1	10.1627	19.2796	NO	NO	NO		Rabggtb	27.9331	47.2293	NO	NO	NO
Cdin1	7.2383	14.6282	Yes	Yes	Yes		Rabggtb	29.1113	49.464	NO	NO	NO
Pianp	4.26287	9.24824	NO	NO	NO		Arhgap19	7.42044	13.2679	NO	NO	NO
Zfp691	1.34883	2.49924	NO	NO	NO		S100a14	0.064446	0.444445	NO	NO	NO
Tenm3	1.93369	3.17685	Yes	NO	NO		S100a14	0.0438371	0.344822	NO	NO	NO
Ttc39a	0.41422	1.82022	NO	NO	NO		Senp3	47.3374	83.2847	NO	NO	NO
Ndrg2	6.26552	21.8279	NO	NO	NO		Lrrcc1	0.935647	1.48903	Yes	Yes	Yes
Dlgap2	0.0320815	0.160391	NO	NO	NO		Plxdc1	1.44606	2.36642	NO	NO	NO
Fam98c	6.77205	11.302	NO	NO	NO		Psma8	1.96322	3.96487	NO	NO	NO
Als2cl	2.17152	5.53805	NO	NO	NO		Tars2	11.5656	18.7634	NO	NO	NO
Mtss1	14.6627	24.6248	NO	NO	NO		Tars2	11.1181	17.9968	NO	NO	NO
Msh5	0.125749	1.12247	NO	NO	NO		Tars2	4.46132	7.69483	NO	NO	NO
Cables1	0.436438	1.01553	NO	NO	NO		Sult6b1	1.21928	3.46996	NO	NO	NO
Clcnka	0.204328	0.61589	NO	NO	NO		Satb1	0.515616	1.79605	Yes	Yes	Yes
Rbm46	0.162959	0.400325	Yes	Yes	Yes		Satb1	0.510118	1.79473	Yes	Yes	Yes
Eng	6.52093	19.7858	NO	NO	NO		Satb1	0.515653	1.81649	Yes	Yes	Yes
Cacnb1	2.23376	4.48282	NO	NO	NO		Chn2	0.332237	0.792687	NO	NO	NO
Grid2ip	0.0812155	0.283098	NO	NO	NO		Abcc4	12.2033	26.3721	NO	NO	NO
Gtpbp8	2.72332	4.62555	NO	NO	NO		Abcc4	12.4351	26.8865	NO	NO	NO
Casz1	1.3477	3.83067	NO	NO	NO		Rpap1	12.8623	22.9203	NO	NO	NO
Ube2v2	0.396227	0.689985	NO	Yes	NO		Fbxo27	0.726143	1.80348	NO	NO	NO
Polq	0.841481	2.73892	Yes	Yes	Yes		Dnaaf4	0.469669	0.955525	NO	NO	NO
Gjc1	16.4412	31.9557	NO	NO	NO		Pde9a	2.11409	8.94986	NO	NO	NO
Upp1	76.4637	152.133	NO	NO	NO		Tcf19	4.25833	7.17721	NO	NO	NO
B3gnt5	1.18091	2.39195	NO	NO	NO		Tcf19	4.66133	7.8771	NO	NO	NO
Mcf2l	1.24827	2.44986	NO	NO	NO		Wdr90	1.39176	2.26636	NO	NO	NO
Rbp4	0.540488	1.46429	NO	NO	NO		Pabpc6	0.0470506	0.334919	NO	NO	NO
Ppm1b	4.69312	10.2846	NO	NO	NO		Rpl3l	0.163324	0.64411	NO	NO	NO
Esrrb	70.3638	203.176	NO	NO	NO		Zfp605	0.64708	1.20158	NO	NO	NO
Tnfsf13	1.26652	2.48288	NO	NO	NO		Homer2	0.227899	0.384945	NO	NO	NO
Grip2	0.0478304	0.224675	NO	NO	NO		Homer2	0.232114	0.388043	NO	NO	NO
Macroh2a1	43.6192	70.411	NO	NO	NO		Pias2	14.4872	23.4817	NO	NO	NO
Qk	8.10783	15.6595	NO	NO	NO		Pias2	14.4071	23.3209	NO	NO	NO
Shd	0.259751	0.907311	NO	NO	NO		Pias2	24.1774	38.8619	NO	NO	NO
Dpp4	0.713722	2.17788	Yes	Yes	Yes		Pias2	23.9948	38.5609	NO	NO	NO
Lnx1	1.31475	2.14355	NO	NO	NO		Rerg	0.883106	1.68033	NO	NO	NO
Sirt1	12.5754	21.3139	NO	NO	NO		Rerg	0.88715	1.69687	NO	NO	NO
Pum1	25.3242	42.3075	NO	NO	NO		Rpa1	42.8244	68.7909	NO	NO	NO
Lrrc57	5.66872	9.88003	NO	NO	NO		Phf11c	0.328529	0.950297	NO	NO	NO
Slc44a1	11.9777	21.9591	NO	NO	NO		Ska1	4.01884	6.64331	NO	NO	NO
Prrc2b	23.5074	48.8074	NO	NO	NO		Erlin1	4.65315	7.78443	NO	NO	NO
Araf	7.33324	11.9351	NO	NO	NO		Erlin1	4.76423	7.98277	NO	NO	NO
Crybb3	0.314639	1.33716	NO	NO	NO		Plekha8	1.78418	3.12202	NO	NO	NO
Proser2	0.530855	1.37772	NO	NO	NO		Cep55	10.1205	21.6047	NO	NO	NO
Ppp1r16b	0.0604538	0.561987	NO	NO	NO		Bcas1	0.747898	1.55784	NO	NO	NO
Rab17	0.111784	0.530271	NO	NO	NO		Mical1	4.5306	7.73001	NO	NO	NO
Nr5a2	8.01825	13.6973	NO	NO	NO		Ankrd33b	1.14797	4.14859	NO	NO	NO
Als2	5.60253	10.2496	NO	NO	NO		Dpys	0.796901	1.38517	NO	NO	NO
Ralgps2	2.67725	5.39248	NO	Yes	NO		Akap11	5.26022	10.9459	NO	NO	NO
Gjb3	17.7671	29.7502	NO	NO	NO		Rnf165	1.1453	2.13545	NO	NO	NO
Blzf1	3.5802	5.80195	NO	NO	NO		Ildr2	0.138219	0.308284	NO	NO	NO
Plekha6	0.680373	1.95446	NO	NO	NO		Dap3	8.04444	13.6631	NO	NO	NO
Nfasc	0.380002	1.3803	NO	NO	NO		Pdzk1ip1	0.0542206	0.341349	NO	NO	NO
Svip	0.970707	1.65185	Yes	NO	NO		Pdzk1ip1	0.0743464	0.438893	NO	NO	NO
Rnf152	0.0470039	0.155454	Yes	Yes	Yes		Egfl7	7.36077	12.1872	NO	NO	NO
Ccdc112	1.39623	2.6865	NO	NO	NO		Vill	2.661	5.02909	NO	NO	NO
Gstm4	2.96298	6.2906	NO	NO	NO		Zfp961	8.10221	19.9807	NO	NO	NO
Triml2	17.494	52.1888	NO	NO	NO		Zfp809	5.61526	9.12001	NO	NO	NO
Sh3bp5l	4.46592	7.73882	NO	NO	NO		Arhgap8	6.38249	11.0897	NO	NO	NO
Nxt2	2.58805	8.42157	NO	Yes	NO		Arhgap8	6.41217	11.1338	NO	NO	NO
Islr2	0.422622	4.36034	NO	NO	NO		Trank1	0.043482	0.220328	NO	NO	NO
Cdc45	11.9889	21.591	NO	NO	NO		Dnah6	0.0809938	0.287158	NO	NO	NO
Tgm1	3.46245	16.4748	NO	NO	NO		Zfp229	1.58933	5.89487	Yes	Yes	Yes
Tfeb	11.8636	27.8797	NO	NO	NO		Mpp4	0.871909	2.00002	NO	NO	NO
Palm	15.9195	27.0002	NO	NO	NO		Hspb2	1.57771	3.58197	NO	NO	NO
Fmo5	0.132279	0.294461	NO	NO	NO		Bend4	2.75568	5.52391	NO	NO	NO
Cblc	1.42058	5.79615	NO	NO	NO		Slc52a3	1.56987	5.49942	NO	NO	NO
Fbxo44	2.77304	4.45268	NO	NO	NO		Slc52a3	1.36394	5.09299	NO	NO	NO
Taf7l2	0.0316852	0.386385	Yes	Yes	Yes		P2rx2	0.276269	1.03857	NO	NO	NO
Miga1	2.91106	6.5976	NO	NO	NO		P2rx2	0.268468	1.01941	NO	NO	NO
Mpst	6.99594	16.2666	NO	NO	NO		Majin	0.0956753	0.398359	NO	NO	NO
Fzd6	1.0328	1.68209	NO	NO	NO		Rgs9	0.0904561	0.307348	NO	NO	NO
Parvg	0.249668	1.50906	NO	NO	NO		Nsun6	0.541553	0.906368	Yes	Yes	Yes
Troap	6.33052	12.4989	NO	NO	NO		Nsun6	0.516582	0.878199	Yes	Yes	Yes
Stk32c	0.167865	0.479659	NO	NO	NO		Tmem215	0	0.0503789	Yes	Yes	Yes
Nsmce4a	25.8415	41.9824	NO	NO	NO		Slc4a5	1.18203	4.87512	NO	NO	NO
Nrip2	0.209038	0.95239	NO	NO	NO		Mgll	0.289552	1.19495	NO	NO	NO
Syce3	0.511678	3.31095	NO	NO	NO		Mgll	0.256822	1.08356	NO	NO	NO
Mdm1	4.21458	6.94333	NO	NO	NO		Cspg5	0.352713	1.52992	NO	NO	NO
Susd2	2.19984	11.6733	NO	NO	NO		Ccdc33	0.0227052	0.121953	NO	NO	NO
Ccdc90b	5.27391	8.58322	NO	Yes	NO		Fam122b	1.81467	4.50679	NO	NO	NO
Pkp3	1.03133	3.90606	NO	NO	NO		Ezhip	0.235385	2.20535	Yes	Yes	Yes
Nudt17	1.70733	3.62397	NO	NO	NO		Spock1	0.0527125	0.353606	NO	NO	NO
Rmi2	0.768287	1.72982	NO	NO	NO		Spock1	0.019831	0.130579	NO	NO	NO
Rpl10l	9.21896	24.7842	Yes	NO	NO		Spock1	0.0198819	0.130914	NO	NO	NO
Hif3a	1.22657	3.7052	NO	NO	NO		Spock1	0.0526559	0.353226	NO	NO	NO
Ccdc138	1.88617	5.59867	NO	NO	NO		Fam122b	1.71844	4.35601	NO	NO	NO
Sgsm1	0.91006	2.61158	NO	NO	NO		Fmr1nb	5.22976	9.57659	NO	NO	NO
Crybg2	0.995348	7.69842	NO	NO	NO		Fmr1nb	5.32753	9.53699	NO	NO	NO
Lrrc51	0.982405	2.83884	NO	NO	NO		Rtel1	10.7032	19.3101	NO	NO	NO
Megf6	0.126649	1.04997	NO	NO	NO		Rtel1	10.9016	19.7644	NO	NO	NO
Eml2	5.99426	12.0198	NO	NO	NO		Rtel1	10.8374	19.6322	NO	NO	NO
Tnik	0.283012	0.585422	NO	NO	NO		Rtel1	10.6125	19.1573	NO	NO	NO
Ythdc2	1.58625	2.69851	NO	Yes	NO		Spata31d1b	0.226823	2.0157	NO	NO	NO
Gprasp2	1.2979	3.42544	NO	NO	NO		Tbc1d31	3.47215	6.09925	NO	NO	NO
Adgre5	12.007	33.0402	NO	NO	NO		Gpr19	4.94118	8.10406	NO	NO	NO
Lcorl	0.482796	0.954746	Yes	Yes	Yes		Gpr19	5.11426	8.42014	NO	NO	NO
Ppp1r36	0.0567758	0.328856	NO	NO	NO		Gpr19	5.02749	8.26686	NO	NO	NO
Cog5	3.61773	5.95216	NO	NO	NO		Gpr19	4.80138	7.90211	NO	NO	NO
Elf3	4.94893	14.3089	NO	NO	NO		Gpr19	5.1172	8.41417	NO	NO	NO
Shisal1	0.0518039	0.300061	NO	NO	NO		Gpr19	4.54018	7.43953	NO	NO	NO
Begain	0.717417	2.01052	NO	NO	NO		Rad18	3.45181	5.73909	NO	NO	NO
Plekhb1	2.36101	7.49704	NO	NO	NO		Wipf3	0.48003	0.793429	NO	NO	NO
Otud6a	0.0511118	1.26953	NO	NO	NO		Wipf3	0.385563	0.716357	NO	NO	NO
Fgfr3	0.190228	1.69197	NO	NO	NO		Zfp568	13.2951	23.4432	NO	NO	NO
Birc7	0.0525753	0.432633	NO	NO	NO		Zfp568	13.3247	23.486	NO	NO	NO
Zbtb5	0.668623	1.32865	NO	NO	NO		Nrg2	0.182564	1.17939	NO	NO	NO
Susd1	0.655332	2.89356	NO	NO	NO		Col6a5	0.137172	0.314725	NO	NO	NO
Coq8a	1.81549	4.84798	NO	NO	NO		Zyg11a	2.44262	5.58434	NO	NO	NO
Pcgf2	23.7578	42.2518	NO	NO	NO		1110032F04Rik	0.0549534	0.222102	NO	NO	NO
Atp2a3	0.575263	21.7705	NO	NO	NO		Tex11	0.341607	1.72621	NO	NO	NO
Fignl1	8.2091	16.5126	NO	NO	NO		Rmi1	0.65477	1.07887	NO	NO	NO
2700049A03Rik	3.46447	6.84023	NO	NO	NO		Mtbp	1.76159	4.1564	NO	NO	NO
Coa8	6.06579	15.1482	NO	NO	NO		Ccdc125	0.486974	0.845534	NO	NO	NO
Mttp	0.529791	1.31891	NO	NO	NO		Zfp57	57.1386	174.241	NO	NO	NO
Hectd2	0.579784	1.14638	Yes	Yes	Yes		Zfp57	47.329	143.833	NO	NO	NO
Cyp2d22	0.218076	0.496565	NO	NO	NO		Pla2g4c	0.163025	1.01721	Yes	Yes	Yes
Neurl1a	2.85369	6.85876	NO	NO	NO		Sarm1	0.590405	1.34454	NO	NO	NO
Arhgap19	7.42044	15.519	NO	NO	NO		Btbd8	0.216599	0.390033	NO	NO	NO
Nr1h4	0.0279695	0.149438	Yes	Yes	Yes		Kcns3	0.442072	1.43895	NO	NO	NO
S100a14	0.0438371	0.305796	NO	NO	NO		Commd6	7.62064	16.081	NO	NO	NO
Senp3	47.3374	84.3774	NO	NO	NO		Fam114a2	10.6623	17.1714	NO	NO	NO
Lrrcc1	0.956321	1.62865	Yes	Yes	Yes		Fam114a2	10.5527	16.9973	NO	NO	NO
Prph	0.951607	3.93474	NO	NO	NO		Tspan8	0.0444775	0.56468	Yes	Yes	Yes
Plxdc1	1.44606	4.39313	NO	NO	NO		Tspan8	0.0433379	0.550211	Yes	Yes	Yes
Psma8	1.96322	3.3101	NO	NO	NO		Cd163	0.00440995	0.0722141	Yes	Yes	Yes
Sult6b1	1.21928	2.93849	NO	NO	NO		Elmod2	1.11213	1.90246	NO	NO	NO
Satb1	0.515616	2.1969	Yes	Yes	Yes		Rbm20	0.129805	0.253052	NO	NO	NO
Cfap70	0.0594197	0.184004	NO	NO	NO		Dtwd2	1.23667	1.96889	NO	NO	NO
Chn2	0.332237	1.06595	NO	NO	NO		Bdh2	2.5157	8.40414	NO	NO	NO
Nkd1	0.495206	1.34981	NO	NO	NO		Senp8	0.836452	1.33077	NO	NO	NO
Cacna1h	0.439182	2.78659	NO	NO	NO		Senp8	0.853566	1.35906	NO	NO	NO
Rpap1	12.8623	22.2415	NO	NO	NO		Senp8	0.857868	1.36591	NO	NO	NO
Fbxo27	0.726143	2.51751	NO	NO	NO		Kdm4c	9.95173	17.6493	NO	NO	NO
Dnaaf4	0.469669	1.18778	NO	NO	NO		Olfr376	0.00865151	0.343972	NO	NO	NO
Ush1c	0.0133355	0.241396	NO	NO	NO		Fxyd4	0.245896	1.17996	NO	NO	NO
Pde9a	2.11409	8.91948	NO	NO	NO		Rlbp1	0.885435	2.29094	NO	NO	NO
Brme1	0.672073	1.24191	NO	NO	NO		Thpo	0.823226	1.42037	NO	NO	NO
Rab37	0.165403	0.590888	NO	NO	NO		Cacna2d2	0.443543	1.33517	NO	NO	NO
Wdr90	1.39176	2.78378	NO	NO	NO		Cacna2d2	0.444919	1.33931	NO	NO	NO
Cracd	0.248646	0.781489	NO	NO	NO		Cacna2d2	0.445651	1.34151	NO	NO	NO
Ppp1r10	17.3519	29.1634	NO	NO	NO		Cacna2d2	0.445406	1.34078	NO	NO	NO
Tbc1d24	1.56538	2.67	NO	NO	NO		Camk2b	3.68686	6.60828	NO	NO	NO
Rpl3l	0.163324	0.582646	NO	NO	NO		Camk2b	3.73257	6.68442	NO	NO	NO
Homer2	0.227899	0.607282	NO	NO	NO		Map3k9	0.982006	1.76845	NO	NO	NO
Add3	5.19332	8.9377	NO	NO	NO		Klk11	0.329524	2.24481	NO	NO	NO
Ppp6r3	21.7781	40.5685	NO	NO	NO		Mymx	18.7377	54.6003	NO	NO	NO
Pias2	14.4872	31.3582	NO	NO	NO		Mymx	18.732	54.4721	NO	NO	NO
Fbxl16	1.47696	3.74645	NO	NO	NO		Mymx	17.8495	51.8799	NO	NO	NO
Pwwp2a	3.57058	5.81091	NO	NO	NO		Plekhd1	0.808971	1.99325	NO	NO	NO
Phf11c	0.328529	0.784054	NO	NO	NO		Zkscan7	0.204187	0.416469	NO	NO	NO
Wars	22.306	36.1264	NO	NO	NO		Zfp600	0.319428	0.668737	NO	NO	NO
Marchf5	13.9623	30.1932	NO	NO	NO		Zfp600	0.312423	0.654073	NO	NO	NO
Erlin1	4.65315	7.66481	NO	NO	NO		Eif1ad8	0.109876	2.42164	Yes	Yes	Yes
Cep55	10.1205	25.2053	NO	NO	NO		Slc25a13	11.0378	19.2561	NO	NO	NO
Mipol1	1.64245	3.94329	Yes	Yes	Yes		Eif1ad4	0.0392318	0.709233	Yes	Yes	Yes
Ankrd33b	1.14797	2.22385	NO	NO	NO		Slc5a6	2.26225	3.75783	NO	NO	NO
Dpys	0.796901	2.87875	NO	NO	NO		Slc5a6	2.42317	3.99435	NO	NO	NO
Ablim3	0.147711	1.12579	NO	NO	NO		Ect2	15.7257	29.3958	NO	NO	NO
Klhl29	0.185504	0.418795	NO	NO	NO		Ect2	15.6399	29.2425	NO	NO	NO
Akap11	5.26022	10.6239	NO	NO	NO		Etl4	8.21045	14.3361	Yes	Yes	Yes
Rnf165	1.1453	3.31682	NO	NO	NO		Etl4	8.01876	13.9506	Yes	Yes	Yes
Zfyve27	2.42995	4.1452	NO	NO	NO		Tdpoz8	0	0.246693	NO	Yes	NO
Dap3	8.04444	12.9312	NO	NO	NO		Ablim2	0.171348	0.694304	NO	NO	NO
Pdzk1ip1	0.0542206	0.394782	NO	NO	NO		Ablim2	0.175511	0.699434	NO	NO	NO
Egfl7	7.36077	15.9037	NO	NO	NO		Ablim2	0.174159	0.698414	NO	NO	NO
Vill	2.661	7.97705	NO	NO	NO		Ablim2	0.177104	0.705781	NO	NO	NO
Cdpf1	2.98353	4.84066	NO	NO	NO		Ablim2	0.161028	0.684159	NO	NO	NO
Arhgap8	6.38249	16.7649	NO	NO	NO		Phactr3	0.0561299	0.172521	NO	NO	NO
Trappc9	2.83959	6.15244	NO	NO	NO		Phactr3	0.0561647	0.172628	NO	NO	NO
Catsperg1	0.0915168	0.264044	NO	NO	NO		Phactr3	0.0581208	0.176221	NO	NO	NO
Trank1	0.043482	0.634916	NO	NO	NO		Sirt3	3.63709	5.96208	NO	NO	NO
Dnah6	0.0809938	0.441973	NO	NO	NO		Rapgef3	1.01477	3.9562	NO	NO	NO
Zfp229	1.58933	6.66954	Yes	Yes	Yes		Rapgef3	1.03931	3.99725	NO	NO	NO
Mpp4	0.871909	1.98877	NO	NO	NO		Otub2	0.951725	1.75316	NO	NO	NO
Hspb2	1.57771	8.64371	NO	NO	NO		Rreb1	3.33031	6.63434	NO	NO	NO
Robo3	0.311313	0.569311	NO	NO	NO		Rreb1	4.04213	7.82511	NO	NO	NO
Eomes	2.13515	3.50721	NO	NO	NO		Igsf5	0	0.0889784	NO	Yes	NO
Bend4	2.75568	7.13809	NO	NO	NO		Igsf5	0.0111056	0.117017	NO	Yes	NO
Slc52a3	1.56987	6.01212	NO	NO	NO		Tfdp2	4.67363	7.76956	NO	NO	NO
P2rx2	0.276269	2.12113	NO	NO	NO		Tfdp2	4.39883	7.35995	NO	NO	NO
Majin	0.0956753	1.01541	NO	NO	NO		Tfdp2	4.71584	7.80491	NO	NO	NO
Rgs9	0.0904561	0.989751	NO	NO	NO		Tfdp2	4.57852	7.55718	NO	NO	NO
Nsun6	0.541553	1.0837	Yes	Yes	Yes		Tfdp2	4.74187	7.85978	NO	NO	NO
Dcaf17	1.9392	4.04572	NO	NO	NO		Rhox13	0.177839	1.82747	NO	NO	NO
Slc4a5	1.18203	2.12027	NO	NO	NO		Zscan4b	0.0819323	0.957271	Yes	NO	NO
Arsg	0.297999	1.09583	NO	NO	NO		Pfdn6	59.8596	95.6877	NO	NO	NO
Niban3	0.386762	0.826619	NO	NO	NO		Tmem132b	0.0129039	0.0535838	NO	NO	NO
Zfp712	0.0817796	0.247008	NO	NO	NO		Ddc	1.1824	1.99997	NO	NO	NO
Cspg5	0.352713	3.79605	NO	NO	NO		Dcaf12l1	1.73378	4.3784	NO	Yes	NO
Ccdc33	0.0227052	0.115613	NO	NO	NO		Ddx19b	3.17668	5.85516	NO	NO	NO
6030458C11Rik	1.45069	2.57333	NO	NO	NO		Ddx19b	3.12747	5.75405	NO	NO	NO
Fam122b	1.81467	4.70779	NO	NO	NO		Kat2b	4.39777	7.50548	NO	NO	NO
4931428F04Rik	1.6606	2.70963	NO	NO	NO		Ndfip2	7.48509	15.0792	NO	NO	NO
Spock1	0.0527125	0.237936	NO	NO	NO		Dync1i1	0.0970728	0.517178	Yes	Yes	Yes
Vmac	5.42168	9.37504	NO	NO	NO		Dync1i1	0.0989249	0.527045	Yes	Yes	Yes
Dennd1b	1.4232	2.37599	Yes	Yes	Yes		Dync1i1	0.0943177	0.499619	Yes	Yes	Yes
Slc39a11	3.91575	7.25968	NO	NO	NO		Dync1i1	0.0964255	0.510784	Yes	Yes	Yes
Sec14l1	24.5557	50.4521	NO	NO	NO		Ddx43	1.0438	3.96825	NO	NO	NO
Dynlt1a	0.75195	1.59096	NO	NO	NO		Tmc8	1.02519	2.36374	NO	NO	NO
Large2	3.01188	8.03047	NO	NO	NO		Tmc8	1.05636	2.43478	NO	NO	NO
Cep95	2.92773	5.6236	NO	NO	NO		Tmc8	1.05755	2.43327	NO	NO	NO
Spata31d1b	0.226823	1.61173	NO	NO	NO		Nek10	0.0182122	0.114248	NO	NO	NO
Rhbdf2	10.6622	17.9066	NO	NO	NO		Gm3336	0.519728	1.20416	NO	NO	NO
Sirt4	1.4392	3.10048	NO	NO	NO		Fsd1l	0.927765	1.60383	NO	NO	NO
Gpr19	4.94118	7.98748	NO	NO	NO		Srsf7	39.6831	67.0091	NO	NO	NO
Rad18	3.45181	6.59382	NO	NO	NO		Srsf7	39.5703	66.7222	NO	NO	NO
Wipf3	0.48003	1.41283	NO	NO	NO		Srsf7	39.2374	66.2253	NO	NO	NO
Nrg2	0.182564	0.838915	NO	NO	NO		Dclk2	3.0564	5.02579	NO	NO	NO
Slc8a3	0.0393686	0.145866	NO	NO	NO		Dclk2	3.10216	5.10195	NO	NO	NO
Zyg11a	2.44262	6.35607	NO	NO	NO		Dclk2	3.05015	5.01042	NO	NO	NO
1110032F04Rik	0.0549534	0.231149	NO	NO	NO		Dclk2	3.05494	5.01688	NO	NO	NO
Tex11	0.341607	1.94134	NO	NO	NO		Tpbgl	0.10991	0.286687	NO	NO	NO
Mtbp	1.76159	4.41052	NO	NO	NO		Arhgap32	3.7764	6.5349	NO	NO	NO
Fam83h	2.66508	6.36117	NO	NO	NO		Rgs22	0.0944625	0.957683	NO	NO	NO
Arhgap39	3.73276	7.63592	NO	NO	NO		Frem1	0.0311215	0.108276	NO	Yes	NO
R3hdm2	16.7677	27.9871	NO	NO	NO		Spc25	12.7687	20.9916	NO	NO	NO
Scara5	0.0247067	0.140624	NO	NO	NO		Spc25	14.9403	24.5971	NO	NO	NO
Ccdc125	0.486974	1.0233	NO	NO	NO		Slc38a3	1.48588	2.40922	NO	NO	NO
Ncmap	0.261811	1.20083	NO	NO	NO		Slc38a3	1.46115	2.38487	NO	NO	NO
Sarm1	0.590405	2.15283	NO	NO	NO		Tex14	1.21474	2.50895	NO	NO	NO
Kcns3	0.442072	0.946541	NO	NO	NO		Cacng5	0.0164846	0.10723	NO	NO	NO
C2cd4c	0.0457512	0.173734	NO	NO	NO		Lig1	44.3407	96.6547	NO	NO	NO
Fam114a2	10.6623	17.6476	NO	NO	NO		Zfp94	0.524144	1.07927	NO	NO	NO
Rnf144b	0.269207	0.602708	NO	NO	NO		Pnck	0.456416	1.10237	NO	NO	NO
Elmod2	1.11213	2.59532	NO	NO	NO		Pnck	0.484758	1.17336	NO	NO	NO
Wdr59	3.915	7.43085	NO	NO	NO		Magec2	0.792544	1.7824	Yes	Yes	Yes
Rbm20	0.129805	0.523319	NO	NO	NO		Magec2	0.8086	1.81263	Yes	Yes	Yes
Ncald	0.120617	0.291846	NO	NO	NO		1700013H16Rik	0.0655182	0.339948	NO	NO	NO
Wdr33	7.85579	13.554	NO	NO	NO		Cyp4f14	0.0103202	0.259835	NO	NO	NO
Dbndd1	0.598952	1.6266	NO	NO	NO		Cyp4f14	0.0103355	0.260221	NO	NO	NO
Abat	0.719488	1.32089	NO	NO	NO		Cyp4f14	0.00951548	0.244737	NO	NO	NO
Il4i1b	1.9485	4.07382	NO	NO	NO		Cyp4f14	0.00952851	0.245072	NO	NO	NO
Bdh2	2.5157	7.41152	NO	NO	NO		Gm11544	0.0150345	0.318415	NO	NO	NO
Lrrc56	1.23405	2.48014	NO	NO	NO		Mgat4c	0.0257113	0.124084	Yes	Yes	Yes
Senp8	0.836452	1.61632	NO	NO	NO		Kat6b	17.4868	35.6409	NO	NO	NO
Dis3l2	3.45866	6.20783	NO	NO	NO		Fgfr3	0.188922	1.4902	NO	NO	NO
Thpo	0.823226	1.56299	NO	NO	NO		Crxos	0.0622522	0.316967	NO	NO	NO
Cacna2d2	0.443543	3.30509	NO	NO	NO		Tmem39a	13.5061	30.3657	NO	NO	NO
Camk2b	3.68686	6.72091	NO	NO	NO		Tmem39a	12.296	26.7464	NO	NO	NO
Map3k9	0.982006	4.28518	NO	NO	NO		Arhgap8	6.29916	10.9375	NO	NO	NO
Rasgrp4	2.39767	5.97932	NO	NO	NO		Shisa8	0.831445	1.74212	NO	NO	NO
Klk11	0.329524	2.07068	NO	NO	NO		Fignl2	1.38418	2.78181	NO	NO	NO
Mroh4	0.0172982	0.169474	NO	NO	NO		Slc37a1	1.81761	4.0413	NO	NO	NO
Zfp516	4.53077	11.9412	NO	NO	NO		Cep57l1	2.6182	5.82951	NO	NO	NO
Mymx	18.7377	51.9393	NO	NO	NO		Cep57l1	2.80269	6.12002	NO	NO	NO
Plekhd1	0.808971	1.85063	NO	NO	NO		Zfp981	1.90801	4.28046	NO	NO	NO
Zkscan7	0.204187	0.569246	NO	NO	NO		Zfp981	1.99914	4.44989	NO	NO	NO
Ect2	15.7257	29.6232	NO	NO	NO		Zfp383	1.50871	2.69193	NO	NO	NO
Slc45a3	0.780392	1.67766	NO	NO	NO		Trim34b	0.0732918	0.294717	NO	NO	NO
Grb10	14.8553	26.8974	NO	NO	NO		Ggnbp1	0.699008	1.40149	NO	NO	NO
Grin1	0.517623	0.880314	NO	NO	NO		Cacna1a	2.21518	3.5403	NO	NO	NO
Ablim2	0.171348	4.3006	NO	NO	NO		Rpl31	7.47476	11.8872	NO	NO	NO
Tsc22d1	57.9901	110.871	NO	NO	NO		Shmt2	32.8071	74.8874	NO	NO	NO
Rgs20	0.167915	0.642376	NO	NO	NO		Pan2	7.29593	11.7426	NO	NO	NO
Afap1l2	0.315165	0.834457	NO	NO	NO		Pan2	7.35663	11.8203	NO	NO	NO
Rapgef3	1.01477	5.28452	NO	NO	NO		Mybpc1	0.0231521	0.136387	NO	NO	NO
Otub2	0.951725	3.72254	NO	NO	NO		D16Ertd472e	2.00273	4.52556	NO	NO	NO
Phka2	2.95091	5.65076	Yes	Yes	Yes		D16Ertd472e	2.01984	4.57841	NO	NO	NO
Rpgr	1.48132	3.42093	Yes	Yes	Yes		D16Ertd472e	2.0216	4.58301	NO	NO	NO
Zmym3	6.70743	12.2135	NO	NO	NO		Pou5f1	106.552	225.13	NO	NO	NO
Prdm16	0.233145	1.23267	NO	NO	NO		Cmtm7	17.5274	29.4746	NO	NO	NO
Tfdp2	4.67363	9.94934	NO	NO	NO		D430019H16Rik	0.205627	0.524295	NO	NO	NO
Rhox13	0.177839	1.97426	NO	NO	NO		Slco2b1	0.00665302	0.163038	NO	NO	NO
Psrc1	55.263	107.13	NO	NO	NO		Slco2b1	0.00673614	0.165075	NO	NO	NO
Tmem132b	0.0129039	0.174604	NO	NO	NO		Llgl2	13.3988	21.8398	NO	NO	NO
Kcng2	0.0289022	0.147015	NO	NO	NO		Folr1	9.9877	17.3232	NO	NO	NO
Caly	0.1694	0.590545	NO	NO	NO		Folr1	10.4427	18.1831	NO	NO	NO
Bend7	0.276967	0.807338	NO	NO	NO		Folr1	10.6174	18.4902	NO	NO	NO
Ddah2	19.1013	46.7117	NO	NO	NO		Mllt10	6.68409	12.601	NO	NO	NO
Dcaf12l1	1.73378	5.86124	NO	Yes	NO		Mllt10	6.61831	12.4797	NO	NO	NO
Ddx19b	3.17668	7.44611	NO	NO	NO		Cars	16.1011	26.4922	NO	NO	NO
Dnajc1	4.07595	7.29407	NO	NO	NO		Cdh23	0.0577886	0.252148	NO	NO	NO
Kat2b	4.39777	8.10109	NO	NO	NO		Slc7a7	34.2381	59.6468	NO	NO	NO
Kif17	0.181962	0.974861	NO	NO	NO		Slc7a7	32.8307	56.9487	NO	NO	NO
Ndfip2	7.48509	17.41	NO	NO	NO		Tdrd3	1.19221	2.40062	Yes	Yes	Yes
Ddx43	1.0438	4.18482	NO	NO	NO		Enox1	8.39397	14.8848	NO	NO	NO
Lysmd4	0.463479	1.5295	NO	NO	NO		Dgkh	1.2628	2.96608	NO	NO	NO
Cldn7	2.73349	5.10087	NO	NO	NO		Smim22	0.159712	1.1209	NO	NO	NO
Dlc1	9.84472	16.3766	Yes	Yes	Yes		Smim22	0.140932	1.07793	NO	NO	NO
Acp4	0.0238226	0.43122	NO	NO	NO		Smim22	0.187176	1.31365	NO	NO	NO
Tmc8	1.02519	3.0383	NO	NO	NO		Smim22	0.166168	1.27095	NO	NO	NO
Cfap73	0.0679424	0.376511	NO	NO	NO		Mtf2	19.7066	42.5921	NO	NO	NO
Foxl3	0	0.218831	NO	NO	NO		Mtf2	20.3269	44.5681	NO	NO	NO
Gm3336	0.519728	1.36639	NO	NO	NO		Mtf2	20.6999	45.1968	NO	NO	NO
Gfy	0.186041	1.2384	NO	NO	NO		Mtf2	19.2856	42.3667	NO	NO	NO
Kifc1	7.22327	14.4177	NO	NO	NO		Efcab15	0.633279	1.41907	NO	NO	NO
Srsf7	39.6831	70.416	NO	NO	NO		Echdc2	15.3404	29.1888	NO	NO	NO
Dclk2	3.0564	6.68283	NO	NO	NO		Zfp850	1.71429	3.23516	NO	NO	NO
Arhgap32	3.7764	6.86751	NO	NO	NO		Hsf4	0.415456	0.883068	NO	NO	NO
Gm5901	0.448387	1.2779	NO	NO	NO		Hsf4	0.424912	0.912529	NO	NO	NO
Rgs22	0.0944625	1.84681	NO	NO	NO		Esp24	0	0.399245	NO	NO	NO
Map7	5.40013	12.9074	NO	NO	NO		Scgb1b3	0	0.294392	NO	NO	NO
Aatk	0.202949	0.559269	NO	NO	NO		Sun1	12.4241	22.0183	NO	NO	NO
Ccpg1os	3.50248	6.81875	NO	NO	NO		Sun1	12.3578	21.9355	NO	NO	NO
Adgrg1	1.13606	2.06404	NO	NO	NO		Sun1	12.4938	22.2203	NO	NO	NO
Gm7694	0.258123	0.622177	NO	NO	NO		Sun1	12.9014	22.8746	NO	NO	NO
Itsn2	4.13294	6.78187	NO	NO	NO		Fsbp	0.716675	1.20373	NO	NO	NO
Tcof1	43.8507	71.6572	NO	NO	NO		Rad54b	0.885637	1.48599	NO	NO	NO
Spc25	12.7687	21.2738	NO	NO	NO		Rims2	0.560164	1.02659	NO	NO	NO
Ascc1	10.7316	19.7973	NO	NO	NO		Rims2	0.563717	1.03727	NO	NO	NO
Slc38a3	1.48588	4.09036	NO	NO	NO		Rims2	0.693794	1.1505	NO	NO	NO
Sptbn4	1.33505	3.01347	NO	NO	NO		Usp17le	0.226293	3.61998	NO	NO	NO
Tex14	1.21474	5.57674	NO	NO	NO		Kcnj12	0.117855	0.847222	NO	NO	NO
Cacng5	0.0164846	0.981958	NO	NO	NO		Mical3	2.36084	4.23456	NO	NO	NO
Pnck	0.456416	2.35861	NO	NO	NO		Cbs	4.12112	168.418	NO	NO	NO
Vps37d	1.50146	2.49902	NO	NO	NO		Clip4	1.36375	2.5627	NO	NO	NO
Adgrb2	1.19348	3.34659	NO	NO	NO		Clip4	1.54298	2.88974	NO	NO	NO
Topaz1	0.0295848	0.117686	NO	NO	NO		Spag16	0.166717	0.377781	Yes	Yes	Yes
Zfp839	1.33664	3.00412	NO	NO	NO		Slc4a9	0.0617385	0.314487	NO	NO	NO
Tac2	0.0481532	0.597778	NO	NO	NO		Slc4a9	0.0631064	0.321455	NO	NO	NO
Msi2	2.44008	4.66025	NO	NO	NO		Slc4a9	0.0605637	0.321325	NO	NO	NO
Kcnj11	0.0335473	0.233609	NO	NO	NO		Slc4a9	0.0695475	0.318568	NO	NO	NO
Reep2	1.7322	3.68021	NO	NO	NO		Aire	0.670374	5.14087	NO	NO	NO
Reep6	14.384	28.1529	NO	NO	NO		Aire	0.673484	5.16992	NO	NO	NO
Scarb1	12.3982	21.9998	NO	NO	NO		Aire	0.674527	5.15975	NO	NO	NO
Cyb5r2	0.0733049	0.546403	NO	NO	NO		Aire	0.707266	5.23535	NO	NO	NO
Nrxn2	0.536353	1.18499	NO	NO	NO		Aire	0.708462	5.22435	NO	NO	NO
Kat6b	17.4868	55.8825	NO	NO	NO		Aire	0.712077	5.25672	NO	NO	NO
Tmem39a	13.5061	34.468	NO	NO	NO		Aire	0.71329	5.24569	NO	NO	NO
Psat1	37.7038	79.1142	NO	NO	NO		Aire	0.728488	5.37965	NO	NO	NO
Papln	0.0545733	0.190051	NO	NO	NO		Aire	0.742097	5.41147	NO	NO	NO
Shisa8	0.831445	2.77002	NO	NO	NO		Aire	0.733809	5.40365	NO	NO	NO
Fignl2	1.38418	9.23532	NO	NO	NO		Aire	0.735151	5.39207	NO	NO	NO
Rnf223	0.309396	1.70659	NO	NO	NO		Cdc7	4.39227	7.27421	NO	NO	NO
Fam160a2	2.55078	4.23299	NO	NO	NO		Cdc7	4.76945	7.8492	NO	NO	NO
Ncoa6	8.1594	17.6072	NO	NO	NO		Cdc7	4.79044	7.84882	NO	NO	NO
Cep57l1	2.6182	5.27641	NO	NO	NO		Tktl2	0.0111176	0.120858	Yes	NO	NO
Gm11837	1.16504	3.75052	NO	NO	NO		Tk1	6.04086	11.3807	NO	NO	NO
Zfp383	1.50871	3.9867	NO	NO	NO		Sema6c	1.68438	3.51426	NO	NO	NO
Trim34b	0.0732918	0.369899	NO	NO	NO		Ada	3.83696	7.02681	NO	NO	NO
Zkscan8	0.777237	1.25964	NO	NO	NO		Zbtb34	1.16547	2.06056	NO	NO	NO
Ggnbp1	0.699008	2.70066	NO	NO	NO		Setmar	1.67042	2.71563	NO	NO	NO
Cacna1a	2.21518	5.33825	NO	NO	NO		Kcnip2	0.630966	2.24779	NO	NO	NO
Gga3	6.64231	11.0183	NO	NO	NO		Whrn	2.2302	4.29155	NO	NO	NO
Greb1	0.410668	0.727108	NO	NO	NO		Ahsg	0.231198	1.0865	NO	NO	NO
Cadps2	0.130738	0.312186	Yes	Yes	Yes		Ahsg	0.213339	1.14853	NO	NO	NO
Shmt2	32.8071	107.048	NO	NO	NO		Cited1	1.0398	2.52909	NO	NO	NO
Pan2	7.29593	16.056	NO	NO	NO		Cited1	1.23001	2.96049	NO	NO	NO
Syt1	0.0778317	0.205906	Yes	Yes	Yes		Cited1	0.940966	2.24005	NO	NO	NO
Rundc3a	2.88112	5.93166	NO	NO	NO		Arc	4.25705	10.5817	NO	NO	NO
Pou5f1	106.552	194.437	NO	NO	NO		Rbpj	7.5068	12.5181	NO	NO	NO
Cyfip2	3.17646	9.20674	NO	NO	NO		Gm867	12.395	28.8884	NO	NO	NO
Cmtm7	17.5274	51.419	NO	NO	NO		Zmat4	0.407233	2.5821	NO	NO	NO
Inca1	0.413295	1.32266	NO	NO	NO		Foxn1	0.00945547	0.0889373	NO	NO	NO
Osbpl1a	6.16751	11.3484	NO	NO	NO		Gm11238	0	0.133682	NO	NO	NO
D430019H16Rik	0.205627	1.18648	NO	NO	NO		Dazl	0.456144	4.25511	Yes	Yes	Yes
Ehbp1	2.27666	3.77272	Yes	Yes	Yes		Fkbp6	0.413043	2.22774	NO	NO	NO
Hfm1	0.0833976	0.484679	NO	Yes	NO		Fkbp6	0.419271	2.26133	NO	NO	NO
Zfp82	0.671411	1.17535	NO	NO	NO		Fkbp6	0.316147	1.97541	NO	NO	NO
Llgl2	13.3988	24.5311	NO	NO	NO		Tnnt1	1.49713	2.63795	NO	NO	NO
Gstz1	7.0526	17.8942	NO	NO	NO		Tnnt1	1.55065	2.73226	NO	NO	NO
Mllt10	6.68409	15.5802	NO	NO	NO		Ecel1	0.0456934	0.461264	NO	NO	NO
Rad51b	0.444514	1.55437	NO	NO	NO		Lamb3	0.130326	0.623599	NO	NO	NO
Sulf2	45.6284	77.7837	NO	NO	NO		Itga6	13.1597	24.3722	NO	NO	NO
Cars	16.1011	41.6507	NO	NO	NO		Snap91	0.118648	0.396238	Yes	Yes	Yes
Cdh23	0.0577886	0.403231	NO	NO	NO		Snap91	0.119424	0.401872	Yes	Yes	Yes
Dmtn	16.9416	29.9238	NO	NO	NO		Snap91	0.127062	0.431835	Yes	Yes	Yes
Smc5	5.09745	9.85837	NO	NO	NO		Snap91	0.117128	0.39182	Yes	Yes	Yes
Kcnma1	0.020289	0.187003	NO	NO	NO		Ube2t	8.2639	16.9376	NO	NO	NO
Serinc2	2.68951	5.27605	NO	NO	NO		Dmc1	0.674034	2.41102	NO	NO	NO
Elmod3	2.97054	5.73948	NO	NO	NO		Cryaa	0	0.0988459	NO	NO	NO
Tdrd3	1.19221	3.18372	Yes	Yes	Yes		Cryaa	0	0.106422	NO	NO	NO
Smim22	0.159712	1.27466	NO	NO	NO		Mroh2a	0.513873	1.04412	NO	NO	NO
Racgap1	18.6439	30.2911	NO	NO	NO		Dgkh	1.264	2.96974	NO	NO	NO
Tmem52	0.20538	0.755992	NO	NO	NO		Ace	0.236792	0.451193	NO	NO	NO
Tet1	13.6063	22.9693	NO	NO	NO		Glrb	0.215752	0.44591	Yes	Yes	Yes
Scn5a	0.0959236	0.349174	NO	NO	NO		Rasal1	0.764516	1.2795	NO	NO	NO
Mtf2	19.7066	51.5672	NO	NO	NO		Msh4	0.0347675	0.141726	NO	NO	NO
Sez6l	0.0432507	0.249481	NO	NO	NO		Gtf2a2	7.86817	15.1064	NO	NO	NO
Efcab15	0.633279	1.37177	NO	NO	NO		Gtf2a2	9.6946	19.5468	NO	NO	NO
Zfp850	1.71429	2.97486	NO	NO	NO		Tomt	1.10457	2.28621	NO	NO	NO
Ubox5	3.42871	6.2792	NO	NO	NO		Adora1	0.163835	0.402335	NO	NO	NO
Hsf4	0.415456	1.70325	NO	NO	NO		Cacnb1	2.25784	3.64816	NO	NO	NO
Rslcan18	0.202328	0.441821	NO	NO	NO		Pcnt	6.06617	11.586	NO	NO	NO
Mib2	4.00143	7.76462	NO	NO	NO		Cobl	11.2127	46.951	NO	NO	NO
Sun1	12.4241	33.5023	NO	NO	NO		Cobl	11.3946	47.7954	NO	NO	NO
Fsbp	0.716675	1.67096	NO	NO	NO		Rad17	6.42726	10.2569	NO	NO	NO
BC107364	0.00905705	0.365825	NO	NO	NO		Dnmt3l	32.8513	88.7115	NO	NO	NO
Rims2	0.560164	1.85368	NO	NO	NO		Dnmt3l	18.6715	50.8353	NO	NO	NO
Epha10	0.0448884	0.212971	NO	NO	NO		Dnmt3l	21.16	57.4669	NO	NO	NO
9030624G23Rik	0.121007	0.409893	NO	NO	NO		Dnmt3l	24.2417	65.9218	NO	NO	NO
Usp17le	0.226293	0.655904	NO	NO	NO		Nasp	68.8641	111.287	NO	NO	NO
Kcnj12	0.117855	1.79343	NO	NO	NO		Ttk	10.5943	18.7496	NO	NO	NO
Dpf3	0.0256573	0.226417	NO	NO	NO		Tcf24	0.251653	0.463102	NO	NO	NO
Eef2k	2.34368	3.76656	NO	NO	NO		Mapt	0.425858	4.54283	NO	NO	NO
Zdbf2	2.98037	5.5796	NO	NO	NO		Mapt	0.454159	5.03019	NO	NO	NO
Mical3	2.36084	7.22702	NO	NO	NO		Mapt	0.464295	5.10483	NO	NO	NO
Gm19345	0.637721	1.34912	NO	NO	NO		Gls2	3.98047	7.13549	NO	NO	NO
Bin2	6.6194	12.825	NO	NO	NO		Gls2	4.01163	7.09111	NO	NO	NO
Cbs	4.12112	7.12571	NO	NO	NO		Pars2	1.24769	2.37512	NO	NO	NO
Ephx2	5.08159	19.156	NO	NO	NO		Pars2	1.55812	2.96866	NO	NO	NO
Enox2	1.54418	2.97726	Yes	Yes	Yes		Ildr1	2.86094	10.5629	NO	NO	NO
Gabpb1	8.16052	13.1208	NO	NO	NO		Ildr1	2.87178	10.5439	NO	NO	NO
Scube1	0.0782547	0.326992	NO	NO	NO		Osgepl1	2.26623	4.21779	NO	NO	NO
Clip4	1.36375	4.6691	NO	NO	NO		Prc1	17.9544	31.2536	NO	NO	NO
Spag16	0.166717	0.673542	Yes	Yes	Yes		Prc1	18.0032	31.281	NO	NO	NO
Myh14	1.49535	3.14075	NO	NO	NO		Dhx32	9.772	17.094	NO	NO	NO
Slc4a9	0.0617385	0.501967	NO	NO	NO		Dhx32	10.2155	17.8676	NO	NO	NO
Aire	0.670374	4.97898	NO	NO	NO		Dhx32	10.2403	18.2692	NO	NO	NO
Cdc7	4.39227	9.43421	NO	NO	NO		Hpca	0.970397	2.30347	NO	NO	NO
Sec1	0.35182	0.708728	NO	NO	NO		Hpca	1.01504	2.40178	NO	NO	NO
Rpl37rt	44.1167	75.4403	NO	NO	NO		Timm9	6.45892	12.702	NO	NO	NO
Sort1	3.76049	6.32632	NO	NO	NO		Npr3	0.192388	0.447755	NO	NO	NO
Socs1	3.89873	7.32776	NO	NO	NO		Xkr5	1.78895	3.01458	NO	NO	NO
Gja3	0.0304753	0.391092	NO	NO	NO		Pdyn	0.145593	0.689981	NO	NO	NO
C8g	0.475857	1.49915	NO	NO	NO		Tesmin	0.484585	0.942941	NO	NO	NO
Ano7	0.0548044	0.224568	NO	NO	NO		Tesmin	0.499309	0.971591	NO	NO	NO
Eya2	0.162053	0.976334	NO	NO	NO		C2cd5	6.09875	13.6743	NO	NO	NO
Sema6c	1.68438	4.71603	NO	NO	NO		Clasp2	1.74421	2.9129	NO	NO	NO
Tle5	158.673	265.998	NO	NO	NO		Clasp2	5.49738	9.3881	NO	NO	NO
Epc1	2.1144	4.12497	NO	NO	NO		Clasp2	5.52426	9.43819	NO	NO	NO
Setmar	1.67042	2.93229	NO	NO	NO		Clasp2	5.48299	9.3636	NO	NO	NO
Kcnip2	0.630966	2.79845	NO	NO	NO		Clasp2	1.05045	1.99041	NO	NO	NO
Ahsg	0.231198	1.19369	NO	NO	NO		Atl2	6.51746	10.7081	NO	NO	NO
Arc	4.25705	18.4592	NO	NO	NO		Ssbp1	4.80979	8.2856	NO	NO	NO
Fer1l5	0.188347	0.358596	NO	NO	NO		Xndc1	3.90956	8.22634	NO	NO	NO
Gm867	12.395	39.2482	NO	NO	NO		Xndc1	3.91303	8.20601	NO	NO	NO
Zmat4	0.407233	1.16354	NO	NO	NO		Camk2a	2.05971	3.8237	NO	NO	NO
Grip1	0.338968	0.656433	NO	NO	NO		Gpr160	0.753332	2.47577	NO	NO	NO
Dazl	0.456144	3.71211	Yes	Yes	Yes		Gpr160	0.83253	2.73836	NO	NO	NO
Fkbp6	0.413043	1.19821	NO	NO	NO		Gpr160	0.832063	2.89766	NO	NO	NO
Tnnt1	1.49713	3.20064	NO	NO	NO		Kif14	1.36297	3.11276	NO	NO	NO
Ecel1	0.0456934	1.71679	NO	NO	NO		Gsta3	0.952856	1.93082	NO	NO	NO
Lamb3	0.130326	1.86587	NO	NO	NO		Calca	0.929287	5.7143	Yes	Yes	Yes
Sh3gl3	3.75926	6.71599	NO	Yes	NO		Atp9a	3.28202	5.26851	NO	NO	NO
Itga6	13.1597	29.9987	NO	NO	NO		Atp9a	3.53182	5.61809	NO	NO	NO
Snap91	0.118648	0.399997	Yes	Yes	Yes		Rad1	6.73987	11.0929	NO	NO	NO
Ube2t	8.2639	20.2769	NO	NO	NO		Rad1	1.25704	2.16923	NO	NO	NO
Dmc1	0.674034	4.60302	NO	NO	NO		Cd1d2	0	0.104312	NO	NO	NO
Cryaa	0	0.142349	NO	NO	NO		Mme	1.76518	7.94003	NO	Yes	NO
Mroh2a	0.513873	2.02864	NO	NO	NO		Mme	1.8167	8.20282	NO	Yes	NO
Ace	0.236792	0.991308	NO	NO	NO		Sox17	0.0738626	0.636497	Yes	NO	NO
Glrb	0.215752	0.756869	Yes	Yes	Yes		Sox17	0.0461122	0.465634	Yes	NO	NO
Rasal1	0.764516	1.87794	NO	NO	NO		Sox17	0.057726	0.58291	Yes	NO	NO
Cnga3	0.723486	1.49298	NO	NO	NO		Sox17	0.0589636	0.595407	Yes	NO	NO
Msh4	0.0347675	0.14613	NO	NO	NO		Tcl1	10.4412	39.6257	NO	NO	NO
Deaf1	7.46995	19.4395	NO	NO	NO		Oard1	12.0707	20.609	NO	NO	NO
Tjp3	2.72024	8.29043	NO	NO	NO		Oard1	14.9134	25.3116	NO	NO	NO
Pcnt	6.06617	12.8969	NO	NO	NO		Tfr2	0.105259	0.705969	NO	NO	NO
Cobl	11.2127	70.1225	NO	NO	NO		Tfr2	0.102672	0.675722	NO	NO	NO
Tmem201	8.90838	17.2901	NO	NO	NO		Tfr2	0.103849	0.696513	NO	NO	NO
Tcf24	0.251653	1.43301	NO	NO	NO		Poli	4.29082	9.56683	NO	NO	NO
Carf	0.417924	0.968031	NO	NO	NO		Poli	5.28799	11.8612	NO	NO	NO
Tbx1	0.151991	0.520147	NO	NO	NO		Hormad1	0.358165	1.44814	NO	NO	NO
Ildr1	2.86094	12.1765	NO	NO	NO		Hormad1	0.352898	1.4019	NO	NO	NO
Wnt11	0.539854	0.967253	NO	NO	NO		Hormad1	0.390983	1.56469	NO	NO	NO
B4galt4	1.33973	3.00079	NO	NO	NO		Amph	1.47055	3.16868	Yes	Yes	Yes
Grk3	0.948205	3.34697	NO	NO	NO		Sass6	1.85555	3.70394	NO	NO	NO
Osgepl1	2.26623	4.7075	NO	NO	NO		Sass6	1.84128	3.71419	NO	NO	NO
Zmym6	2.36819	6.47939	NO	NO	NO		Liph	2.54243	4.77647	NO	NO	NO
Dapk1	6.02805	10.6192	NO	NO	NO		Liph	2.58335	4.85853	NO	NO	NO
Zranb3	3.82223	7.42874	NO	NO	NO		Slc25a40	2.30849	4.82577	NO	NO	NO
Prc1	17.9544	34.6369	NO	NO	NO		Slc25a40	2.2874	4.82504	NO	NO	NO
Unk	5.92701	10.8882	NO	NO	NO		Brd8	11.4447	20.2135	NO	NO	NO
Tubgcp2	10.7528	17.9722	NO	NO	NO		Brd8	12.2373	21.5486	NO	NO	NO
Dhx32	9.772	17.9554	NO	NO	NO		Fhod3	0.916471	2.57116	NO	NO	NO
Ghrl	0.628507	2.2436	NO	NO	NO		Fhod3	0.871353	2.43109	NO	NO	NO
Elf1	8.35583	14.0133	NO	NO	NO		Fbxo41	0.0518373	0.169127	NO	NO	NO
Pdyn	0.145593	0.382406	NO	NO	NO		Fbxo41	0.0518853	0.169284	NO	NO	NO
Atl2	6.51746	13.5946	NO	NO	NO		Iqsec3	0.00468521	0.0620851	NO	NO	NO
Xndc1	3.90956	8.26897	NO	NO	NO		Zfp740	13.4819	23.0986	NO	NO	NO
Pacsin1	1.43086	3.11148	NO	NO	NO		Zfp740	13.5812	23.1935	NO	NO	NO
Camk2a	2.05971	4.37679	NO	NO	NO		Zfp740	13.4625	23.0487	NO	NO	NO
Sct	0.872177	2.72931	NO	NO	NO		Zfp740	13.7872	23.5147	NO	NO	NO
Alpl	39.3925	83.083	NO	NO	NO		Clec2i	0	0.055054	Yes	Yes	Yes
Kif14	1.36297	3.65767	NO	NO	NO		Clec2i	0	0.0568078	Yes	Yes	Yes
Atf4	93.2859	151.739	NO	NO	NO		Clec2i	0	0.0588864	Yes	Yes	Yes
Crhr2	0.0486035	0.19269	NO	NO	NO		Mcf2	1.56422	3.77177	Yes	NO	NO
Atp9a	3.28202	9.71215	NO	NO	NO		Mcf2	1.62329	3.82533	Yes	NO	NO
Mme	1.76518	7.24077	NO	Yes	NO		Nxf2	0.0812028	0.251805	NO	Yes	NO
Sox17	0.0738626	0.274261	Yes	NO	NO		Nxf2	0.0838919	0.260143	NO	Yes	NO
Tcl1	10.4412	54.2982	NO	NO	NO		Zap70	0.272233	0.580607	NO	NO	NO
Tfr2	0.105259	1.08938	NO	NO	NO		Zap70	0.276487	0.589679	NO	NO	NO
Hormad1	0.358165	1.08745	NO	NO	NO		Ccdc63	0.109216	0.489391	NO	NO	NO
Amph	1.47055	4.40291	Yes	Yes	Yes		Ccdc63	0.10455	0.468482	NO	NO	NO
Sass6	1.85555	4.52041	NO	NO	NO		Nanog	39.8011	98.3919	NO	NO	NO
Spata7	2.71363	5.46721	NO	NO	NO		Nanog	42.3986	104.972	NO	NO	NO
Chfr	9.54816	15.3436	NO	NO	NO		Nanog	42.7399	105.805	NO	NO	NO
Psd2	0.145489	0.785886	NO	NO	NO		Palb2	1.98578	3.21171	NO	NO	NO
Tfcp2	2.59362	4.93878	NO	NO	NO		Cox6b2	17.963	30.5968	NO	NO	NO
Brd8	11.4447	24.2086	NO	NO	NO		Cox6b2	19.9975	33.8123	NO	NO	NO
Zap70	0.365737	1.0189	NO	NO	NO		Cox6b2	20.1169	33.9169	NO	NO	NO
Btn2a2	0.134785	0.340303	NO	NO	NO		Thpo	0.827632	1.43357	NO	NO	NO
Mynn	3.20697	5.97703	NO	NO	NO		Zfp998	2.01706	3.81493	NO	NO	NO
Fhod3	0.916471	3.8104	NO	NO	NO		Shisa7	0.8713	1.98165	NO	NO	NO
Arhgap33	0.852799	2.78748	NO	NO	NO		Camk1d	3.33042	5.45386	NO	NO	NO
Mcf2	1.56422	4.01432	Yes	NO	NO		Camk1d	3.31997	5.43978	NO	NO	NO
6820408C15Rik	0.067237	0.319367	NO	NO	NO		Camk1d	3.4714	5.76422	NO	NO	NO
Mturn	0.599013	1.98372	NO	NO	NO		Ccnc	2.74408	4.53582	NO	NO	NO
Rnf32	0.685797	1.30778	NO	NO	NO		Abo	0.0178999	0.172618	NO	NO	NO
Rufy3	2.51275	4.55598	NO	NO	NO		Atp1a3	5.73171	9.39351	NO	NO	NO
Poln	0.0622949	0.387504	NO	NO	NO		Mid1	9.45701	16.7818	Yes	Yes	Yes
Ccdc63	0.109216	0.528968	NO	NO	NO		Mid1	8.93266	15.8362	Yes	Yes	Yes
Nanog	39.8011	150.993	NO	NO	NO		Mid1	9.09395	16.2941	Yes	Yes	Yes
Cox6b2	17.963	37.9654	NO	NO	NO		Lrriq4	0.394872	1.44854	NO	NO	NO
Per3	0.650066	1.66133	NO	NO	NO		Mid1	9.76159	19.4764	Yes	Yes	Yes
Csnk1e	18.327	37.3781	NO	NO	NO		Wdr31	2.01404	3.28393	NO	NO	NO
Zfp189	0.699131	1.24921	NO	Yes	NO		Wdr31	2.08849	3.4223	NO	NO	NO
Pld6	0.755635	1.48925	NO	NO	NO		Nxt2	2.50532	6.83141	NO	Yes	NO
Shisa7	0.8713	2.77976	NO	NO	NO		Nxt2	2.47833	6.68338	NO	Yes	NO
Ism2	0.414616	1.41452	NO	NO	NO		Atp4a	0.216232	0.501666	NO	NO	NO
Wnk2	0.346589	1.54355	NO	NO	NO		C8a	0.0144593	0.100106	NO	Yes	NO
Slc26a8	0.0584336	0.19248	NO	NO	NO		Scml2	0.179838	0.649855	Yes	Yes	Yes
Mybl1	1.23528	2.65473	NO	NO	NO		Scml2	0.186685	0.674598	Yes	Yes	Yes
Snapc4	6.77666	11.6137	NO	NO	NO		Cwc22	2.98665	5.49321	Yes	Yes	Yes
Usp45	3.53893	5.85685	NO	NO	NO		Tmx2	3.92895	6.51371	NO	NO	NO
Atp1a3	5.73171	19.6828	NO	NO	NO		Ppp1r14d	0.476805	3.41559	NO	NO	NO
Tmem91	0.603213	1.52213	NO	NO	NO		Adal	2.91247	5.28261	NO	NO	NO
Ttc14	2.3259	4.18047	NO	NO	NO		Adal	2.8454	5.29285	NO	NO	NO
Zer1	3.50869	5.72263	NO	NO	NO		Col17a1	0.134853	0.282205	NO	NO	NO
Mid1	9.45701	38.8472	Yes	Yes	Yes		Cpeb3	0.44315	1.00642	NO	NO	NO
Dolpp1	5.04217	8.85323	NO	NO	NO		Cpeb3	0.471306	1.06634	NO	NO	NO
Lrriq4	0.394872	1.57316	NO	NO	NO		Cpeb3	0.468322	1.06974	NO	NO	NO
Plp1	0.21989	0.786671	NO	NO	NO		Cpeb3	0.478079	1.09596	NO	NO	NO
Ralgps1	1.64252	3.97909	NO	NO	NO		Wdr76	4.83743	7.77531	NO	NO	NO
Atp4a	0.216232	0.481985	NO	NO	NO		Wdr76	4.78141	7.68154	NO	NO	NO
Gapdhs	0.209506	0.676456	NO	NO	NO		Tulp2	0.521907	1.50835	NO	NO	NO
Cntrl	1.96312	3.52508	NO	NO	NO		Tulp2	0.689526	2.16287	NO	NO	NO
Scml2	0.179838	0.363947	Yes	Yes	Yes		Tulp2	0.632673	1.97957	NO	NO	NO
Scn9a	0.0228517	0.135593	Yes	Yes	Yes		Tekt5	0.0518798	0.229214	NO	NO	NO
Kcnc3	1.60179	4.34725	NO	NO	NO		Kcnip3	0.602311	1.06145	NO	NO	NO
Becn2	0.0113706	0.182346	NO	NO	NO		Pla2g10	2.06131	5.10806	NO	NO	NO
Foxj3	6.34053	11.2689	NO	NO	NO		Mcm8	2.40146	4.51123	NO	NO	NO
Ephb2	2.01478	4.79187	NO	NO	NO		Foxa2	0.451632	0.94914	NO	NO	NO
Ppp1r14d	0.476805	2.00439	NO	NO	NO		Foxa2	0.43724	0.924202	NO	NO	NO
Adal	2.91247	5.29179	NO	NO	NO		Polr2a	45.6397	74.8444	NO	NO	NO
Col17a1	0.134853	0.565365	NO	NO	NO		Pfkp	17.0181	33.191	NO	NO	NO
Cpeb3	0.44315	1.33013	NO	NO	NO		Fgf11	0.480607	0.828153	NO	NO	NO
Clstn1	19.4668	42.4756	NO	NO	NO		Rbm39	49.1079	83.4264	NO	NO	NO
Tekt5	0.0518798	0.342935	NO	NO	NO		Rbm39	51.1252	86.7364	NO	NO	NO
Usp43	0.605031	1.41745	NO	NO	NO		Sgk2	0.197603	0.595425	NO	NO	NO
Mcm8	2.40146	4.31788	NO	NO	NO		Xaf1	17.0874	40.8721	NO	NO	NO
Polr2a	45.6397	73.6356	NO	NO	NO		Sgk2	0.156697	0.468053	NO	NO	NO
Aifm3	0.529182	0.99179	NO	NO	NO		Pcsk6	4.44059	13.7259	NO	NO	NO
Pfkp	17.0181	37.838	NO	NO	NO		Myo18a	5.81784	10.635	NO	NO	NO
Dpf2	14.3283	24.1037	NO	NO	NO		Myo18a	5.7402	10.4854	NO	NO	NO
Fgf11	0.480607	1.66897	NO	NO	NO		Myo18a	5.96492	10.4451	NO	NO	NO
Rbm39	49.1079	92.2507	NO	NO	NO		Myo18a	5.90259	10.3473	NO	NO	NO
Dhx35	5.94541	10.0578	NO	NO	NO		Kif7	1.1297	2.15495	NO	NO	NO
Emilin3	0.374871	0.7269	NO	NO	NO		Hnf1b	0.224884	2.3928	NO	NO	NO
Rph3al	0.0423536	0.213196	NO	NO	NO		Hnf1b	0.222959	2.52497	NO	NO	NO
Apba2	0.473734	1.58094	NO	NO	NO		Plekhb1	2.60858	5.75249	NO	NO	NO
Pcsk6	4.44059	21.0736	NO	NO	NO		Art5	0.241731	0.694867	NO	NO	NO
Pcmtd2	2.55969	4.81293	NO	NO	NO		Rad51c	1.80254	3.40223	NO	NO	NO
Myo18a	5.81784	14.2641	NO	NO	NO		Foxred1	5.99708	10.4133	NO	NO	NO
Kif7	1.1297	3.08117	NO	NO	NO		Foxred1	6.00226	10.4275	NO	NO	NO
Sez6	0.0568477	0.349763	NO	NO	NO		Mdk	50.2649	84.3481	NO	NO	NO
Hnf1b	0.224884	0.818887	NO	NO	NO		Mdk	48.9934	82.3349	NO	NO	NO
Misp3	0.769489	1.91175	NO	NO	NO		Mdk	34.1324	56.951	NO	NO	NO
Art5	0.241731	0.862709	NO	NO	NO		Adora1	0.171576	0.401102	NO	NO	NO
Dido1	4.92536	8.05221	NO	NO	NO		Adora1	0.170234	0.395504	NO	NO	NO
Rad51c	1.80254	2.9244	NO	NO	NO		Kyat3	2.38767	5.16209	NO	NO	NO
Adcy9	0.677765	1.19559	NO	NO	NO		Nek1	2.04388	3.59622	Yes	Yes	Yes
Nek1	2.04388	5.15589	Yes	Yes	Yes		Nek1	2.08545	3.65428	Yes	Yes	Yes
Polr3gl	5.68121	14.21	NO	NO	NO		Nek1	2.09932	3.69806	Yes	Yes	Yes
Tuft1	1.59168	7.13088	NO	NO	NO		Polr3gl	5.68121	9.90323	NO	NO	NO
Rorc	0.0273933	0.2033	NO	NO	NO		Tuft1	1.59168	3.12937	NO	NO	NO
Kcnh2	1.89437	4.31604	NO	NO	NO		Zfp2	0.993977	1.70434	NO	NO	NO
Cmc4	0.574054	1.51725	NO	NO	NO		Agap2	0.155569	0.316815	NO	NO	NO
Ngb	0.118348	0.474825	NO	NO	NO		Car7	0.13133	0.414619	NO	NO	NO
Car7	0.13133	0.368615	NO	NO	NO		Car7	0.13513	0.517971	NO	NO	NO
Kctd19	0.0950009	1.14361	NO	NO	NO		Agtrap	15.6586	28.1434	NO	NO	NO
Capn5	4.89579	13.8052	NO	NO	NO		Caprin2	3.83188	7.85978	NO	NO	NO
Gab1	35.2478	57.6576	NO	NO	NO		Syt14	0.585711	0.975782	NO	Yes	NO
Caprin2	3.83188	8.67932	NO	NO	NO		Usp1	10.7311	19.4464	NO	Yes	NO
Syt14	0.585711	1.3374	NO	Yes	NO		Slc7a1	8.30756	27.3053	NO	NO	NO
Tspan33	0.980195	1.75192	NO	NO	NO		Mpdu1	40.4768	70.9783	NO	NO	NO
Usp1	10.7311	17.4404	NO	Yes	NO		Mpdu1	39.149	68.0637	NO	NO	NO
Slc7a1	8.30756	26.6899	NO	NO	NO		Slc7a3	22.1885	42.1321	NO	NO	NO
E4f1	3.47215	5.81926	NO	NO	NO		Dlgap3	5.98683	12.8599	NO	NO	NO
Azin2	3.19348	6.10365	NO	NO	NO		Cenpa	21.2575	34.4022	NO	NO	NO
Dlgap3	5.98683	19.5465	NO	NO	NO		Cenpa	20.1528	33.2679	NO	NO	NO
Cenpa	21.2575	35.555	NO	NO	NO		Cenpa	20.7395	33.444	NO	NO	NO
Aktip	6.71361	11.5407	NO	NO	NO		Cenpa	20.0247	33.6923	NO	NO	NO
Cdc37l1	3.28738	5.54017	NO	NO	NO		Nfe2	0.0801686	0.314771	NO	NO	NO
Gzmm	0.44503	1.42288	NO	NO	NO		Nfe2	0.0892751	0.320889	NO	NO	NO
Mdm4	8.14774	23.639	NO	NO	NO		Nfe2	0.103356	0.397207	NO	NO	NO
Qsox2	2.62438	5.19672	NO	NO	NO		Nfe2	0.100935	0.387902	NO	NO	NO
Aldoc	3.57908	7.49595	NO	NO	NO		Nfe2	0.0997335	0.390772	NO	NO	NO
Hus1	3.91253	7.95157	NO	NO	NO		Kcnt1	0.0219401	0.101503	NO	NO	NO
Stil	2.30705	4.90609	NO	NO	NO		Cdc37l1	2.96993	5.40291	NO	NO	NO
Col13a1	0.267195	3.85496	NO	NO	NO		Mcm5	64.1504	102.95	NO	NO	NO
Plekha7	7.50762	19.6772	NO	NO	NO		Kcnq2	0.112969	0.343755	NO	NO	NO
Ccna1	0.076644	0.641471	NO	NO	NO		Rnf138	8.33433	13.4922	NO	NO	NO
Dtl	16.5662	30.0092	NO	NO	NO		Rnf138	9.01772	14.5374	NO	NO	NO
Pigo	4.05078	7.80479	NO	NO	NO		Prrg3	0.62804	1.14318	NO	NO	NO
E2f2	1.77982	4.51212	NO	NO	NO		Aldoc	3.57908	5.98649	NO	NO	NO
Mad2l2	14.2049	35.5588	NO	NO	NO		Hus1	3.91253	8.57828	NO	NO	NO
Pank4	5.62922	9.99166	NO	NO	NO		Hus1	3.61251	7.92432	NO	NO	NO
Apoe	253.297	705.327	NO	NO	NO		Tmem265	3.50516	5.64285	NO	NO	NO
Ggt1	1.37864	9.66605	NO	NO	NO		Mlh3	2.3529	4.24605	NO	NO	NO
Itga3	6.83452	13.2533	NO	NO	NO		Col13a1	0.267195	1.6943	NO	NO	NO
Mmp11	7.97712	24.2434	NO	NO	NO		Pecam1	3.4546	9.62776	NO	NO	NO
Trim68	1.11464	2.47956	Yes	Yes	Yes		Pecam1	3.53141	9.56485	NO	NO	NO
Hhipl2	0.0196089	0.240557	NO	NO	NO		Plekha7	7.50762	12.3363	NO	NO	NO
Nadsyn1	0.740213	1.99004	NO	NO	NO		Plekha7	7.31631	12.0357	NO	NO	NO
Stat4	3.58642	6.22913	NO	NO	NO		Plekha7	7.01625	11.4132	NO	NO	NO
Zfp51	1.47102	2.87712	NO	Yes	NO		Plekha7	7.25343	11.8044	NO	NO	NO
Sema4f	0.542158	1.18367	NO	NO	NO		Dtl	16.5662	29.6468	NO	NO	NO
Aldh2	41.5551	77.5887	NO	NO	NO		Mcm10	21.1319	33.7725	NO	NO	NO
Porcn	10.7604	18.5034	NO	NO	NO		Pigo	4.05078	6.90111	NO	NO	NO
Gpr50	0.14831	0.658656	Yes	NO	NO		Pigo	4.07316	6.93225	NO	NO	NO
Lrrc31	0.121411	3.23779	NO	NO	NO		E2f2	1.77982	4.68527	NO	NO	NO
Gm45929	1.11504	8.7193	NO	NO	NO		Mad2l2	14.2049	28.121	NO	NO	NO
Dpm1	4.04237	8.56517	NO	NO	NO		Akna	3.03492	4.83367	NO	NO	NO
Tmem218	1.40171	3.06097	NO	NO	NO		Calca	0.272133	1.56324	Yes	Yes	Yes
Synpo2l	0.202579	0.841869	NO	NO	NO		Cenpi	3.22542	5.17882	NO	NO	NO
Mei1	0.035485	0.266934	NO	NO	NO		Spc25	11.1873	18.4025	NO	NO	NO
Ank1	0.121903	0.951345	NO	NO	NO		Bckdhb	12.6311	23.0428	Yes	Yes	Yes
Pde4c	0.279845	1.6995	NO	NO	NO		Ggt1	1.37864	5.46083	NO	NO	NO
Asic3	0.114538	0.524961	NO	NO	NO		Itga3	6.83452	15.4915	NO	NO	NO
Asb10	0.0133402	0.130735	NO	NO	NO		Itga3	6.93938	15.6178	NO	NO	NO
Bend6	0.399529	1.18684	NO	NO	NO		Ints7	7.89891	13.4707	NO	NO	NO
Ankle1	0.621376	1.84603	NO	NO	NO		Ints7	7.81806	13.3599	NO	NO	NO
Osbpl7	2.62259	4.62409	NO	NO	NO		Nadsyn1	0.740213	1.52775	NO	NO	NO
Cnpy1	4.67464	7.79132	NO	NO	NO		Sema4f	0.542158	0.890726	NO	NO	NO
Zfp423	5.34241	8.9004	NO	NO	NO		Pigbos1	4.72376	8.47399	NO	NO	NO
Ankrd23	0.70496	1.90281	NO	NO	NO		Gm27021	6.95892	12.3893	NO	NO	NO
Ankrd39	1.21203	2.0619	NO	NO	NO		Porcn	10.7604	21.8875	NO	NO	NO
Scrib	10.9811	20.8428	NO	NO	NO		Gpr50	0.14831	0.410828	Yes	NO	NO
Paqr6	0.0835928	0.531591	NO	NO	NO		Lrrc31	0.121411	0.738366	NO	NO	NO
Fam126b	0.590604	1.2137	NO	NO	NO		Zfp141	4.68838	7.61559	NO	NO	NO
Lgi2	0.34992	0.693871	NO	NO	NO		Zfp141	4.76789	7.67309	NO	NO	NO
Pmf1	34.677	56.4404	NO	NO	NO		Robo4	0.924801	3.95607	NO	NO	NO
Gata4	0.541544	2.61149	NO	NO	NO		Tcl1	10.8394	40.8083	NO	NO	NO
Rassf6	0.249437	0.801421	Yes	NO	NO		Tcl1	10.5205	39.5699	NO	NO	NO
Igfbp2	102.864	245.701	NO	NO	NO		Gm45929	1.11504	1.94495	NO	NO	NO
Usp37	4.58641	7.99786	NO	NO	NO		Dpm1	4.04237	6.71677	NO	NO	NO
Caps2	0.166872	0.823614	Yes	Yes	Yes		Tmem218	1.40171	2.89478	NO	NO	NO
Lrcol1	0.060175	0.463514	NO	NO	NO		Crocc2	0.258648	0.452058	NO	NO	NO
Cabp1	2.13956	8.09629	NO	NO	NO		Synpo2l	0.202579	0.755738	NO	NO	NO
Cnksr2	0.0866322	0.214247	Yes	Yes	Yes		Synpo2l	0.222105	0.899595	NO	NO	NO
Gemin8	1.17848	1.96188	NO	Yes	NO		Ankle1	0.621376	1.06205	NO	NO	NO
Rnf220	30.1238	55.8611	NO	NO	NO		Cnpy1	4.67464	7.78946	NO	NO	NO
Tenm4	0.817489	2.54206	NO	NO	NO		Cnpy1	4.63967	7.85606	NO	NO	NO
Tex26	0.0600783	0.897782	NO	NO	NO		Zfp423	5.34241	12.9391	NO	NO	NO
B3gat1	0.0304575	0.180118	NO	NO	NO		Tacc3	17.8309	29.1512	NO	NO	NO
Glb1l2	0.250716	1.08853	NO	NO	NO		Fam126b	0.590604	1.08841	NO	NO	NO
Marchf11	0.153954	0.619028	Yes	Yes	Yes		Fam126b	0.602079	1.11691	NO	NO	NO
Dixdc1	1.10615	2.55231	NO	NO	NO		Pmf1	34.677	56.5203	NO	NO	NO
Lingo1	0.72887	1.44762	NO	NO	NO		Gata4	0.541544	4.77496	NO	NO	NO
Celf6	0.0315056	0.170844	NO	NO	NO		Zfp606	0.448675	0.775992	NO	Yes	NO
Tmem209	12.8596	26.3297	NO	NO	NO		Gm21761	0.622677	7.47168	NO	NO	NO
Elovl2	0.647963	2.03032	NO	NO	NO		Pmvk	9.91507	17.5806	NO	NO	NO
Celf5	2.55209	7.44436	NO	NO	NO		Igfbp2	102.864	192.041	NO	NO	NO
Unc5a	0.189789	2.55284	NO	NO	NO		Usp37	4.58641	7.65205	NO	NO	NO
Xrn1	3.50035	7.04696	NO	NO	NO		Ltbp4	6.49536	12.7649	NO	NO	NO
Bmf	1.46212	4.14136	NO	NO	NO		P2rx2	0.294696	1.11204	NO	NO	NO
Kcnn2	0.372311	1.13432	Yes	Yes	Yes		P2rx2	0.334092	1.2196	NO	NO	NO
Hnf4a	0.055998	0.420263	NO	NO	NO		Lrcol1	0.060175	0.438073	NO	NO	NO
Cux2	0.389728	2.80367	NO	NO	NO		Cabp1	2.13956	8.51534	NO	NO	NO
Apool	6.18097	11.0627	Yes	Yes	Yes		Cabp1	3.50093	13.7795	NO	NO	NO
Cdk5rap2	3.2318	5.23832	NO	NO	NO		Gpr83	0.0792238	0.300138	NO	NO	NO
Actg1	1.66932	5.1256	NO	NO	NO		Siglech	0	0.0512153	Yes	NO	NO
Asgr2	0.0562171	0.971943	NO	NO	NO		Unc13b	1.41721	2.914	NO	NO	NO
Cd79b	0.456343	1.77446	NO	NO	NO		B3gat1	0.0304575	0.138154	NO	NO	NO
Krt19	3.4467	7.50147	NO	NO	NO		Glb1l2	0.250716	0.952351	NO	NO	NO
Aldh6a1	3.53279	12.1471	NO	NO	NO		Marchf11	0.153954	0.591415	Yes	Yes	Yes
Ppp1r1b	0.553869	2.38091	NO	NO	NO		Ing3	4.63089	7.41703	NO	NO	NO
Dmd	3.11965	8.30234	Yes	Yes	Yes		Ccdc33	0.0231018	0.144846	NO	NO	NO
Etv4	25.3475	45.4549	NO	NO	NO		Celf6	0.0315056	0.15256	NO	NO	NO
Pctp	1.76987	3.74593	NO	NO	NO		Tmem209	12.8596	30.3587	NO	NO	NO
C8b	0.0100082	0.162874	NO	Yes	NO		Khdc3	3.0602	5.50921	NO	NO	NO
2810408A11Rik	1.57608	5.22355	NO	NO	NO		Mkrn1	49.251	93.9863	NO	NO	NO
Nudt14	4.49196	8.07434	NO	NO	NO		Tpk1	1.03521	2.00885	Yes	Yes	Yes
Rnf167	20.1869	42.0647	NO	NO	NO		Elovl2	0.647963	1.472	NO	NO	NO
Qpct	1.11232	2.71485	NO	NO	NO		Unc5a	0.189789	0.550561	NO	NO	NO
Rasgef1a	0.343539	0.673632	NO	NO	NO		Chn2	0.280436	0.698279	NO	NO	NO
Prss36	1.4046	2.25486	NO	NO	NO		Chn2	0.282403	0.708646	NO	NO	NO
Mmp28	0.668758	1.20105	NO	NO	NO		1700037H04Rik	34.9856	56.1748	NO	NO	NO
Setdb2	2.8135	4.52757	NO	NO	NO		Bmf	1.46212	2.67476	NO	NO	NO
Gm45935	2.12217	3.57243	NO	NO	NO		Ric3	0.612557	1.57074	Yes	Yes	Yes
Klk8	4.78176	9.07239	NO	NO	NO		Kcnn2	0.372311	0.909212	Yes	Yes	Yes
Sntg2	0.0252486	0.277354	Yes	Yes	Yes		Hnf4a	0.055998	0.653476	NO	NO	NO
Slc6a16	0.248741	1.29331	NO	NO	NO		Hnf4a	0.0563842	0.647003	NO	NO	NO
Adamts8	0.21045	0.724463	NO	NO	NO		Cux2	0.389728	0.803734	NO	NO	NO
Suclg2	3.36665	6.41034	Yes	Yes	Yes		Mcm6	41.6225	66.3133	NO	NO	NO
Zfp354a	0.295234	0.896434	NO	NO	NO		Lta4h	22.6681	39.57	NO	NO	NO
Hspa12a	0.617997	1.95624	NO	NO	NO		Asgr2	0.0562171	1.87223	NO	NO	NO
Clgn	1.85083	4.05871	NO	NO	NO		Asgr2	0.0595387	1.98285	NO	NO	NO
Gdf15	1.56656	3.36105	NO	NO	NO		Asgr2	0.0661324	2.20244	NO	NO	NO
Zfand1	1.5956	2.66189	NO	NO	NO		Cd79b	0.456343	1.78316	NO	NO	NO
Alox12	0.326292	2.15828	NO	NO	NO		Krt13	0.165225	0.955933	NO	NO	NO
Rnf181	22.2394	38.0103	NO	NO	NO		Aldh6a1	3.53279	6.17996	NO	NO	NO
Trappc6a	7.51571	20.8277	NO	NO	NO		Ppp1r1b	0.553869	1.20241	NO	NO	NO
Zfp33b	4.24191	7.49541	NO	NO	NO		Dmd	3.11965	5.63573	Yes	Yes	Yes
Col26a1	0.119674	0.956661	NO	NO	NO		Dmd	3.13266	5.6653	Yes	Yes	Yes
Ccdc28a	1.20076	2.79879	NO	NO	NO		Dmd	3.10055	5.61084	Yes	Yes	Yes
Pyy	0.0177389	0.442429	NO	NO	NO		Dmd	3.11331	5.63749	Yes	Yes	Yes
Cyp11a1	0.482619	1.06419	NO	NO	NO		Etv4	25.3475	61.6465	NO	NO	NO
H2az2	13.4855	31.3847	NO	NO	NO		Etv4	25.4074	61.8305	NO	NO	NO
Slc4a8	0.930632	2.29163	NO	NO	NO		C8b	0.0100082	0.351443	NO	Yes	NO
Krba1	2.21974	3.59694	NO	NO	NO		2810408A11Rik	1.57608	3.52275	NO	NO	NO
Ipmk	7.65248	13.1995	NO	NO	NO		2810408A11Rik	1.57142	3.3805	NO	NO	NO
S100pbp	6.71782	12.0742	NO	NO	NO		2810408A11Rik	1.4966	3.34071	NO	NO	NO
Pcbp3	5.56122	11.2469	NO	NO	NO		Rnf167	20.1869	33.7005	NO	NO	NO
Nipal3	1.32264	3.53088	NO	NO	NO		Mrpl2	30.2654	50.7496	NO	NO	NO
Rpl22l1	5.29303	11.2132	NO	NO	NO		H2az1	6.25929	12.5609	NO	NO	NO
Usp48	19.697	41.8082	NO	NO	NO		Fbrsl1	20.1017	40.4779	NO	NO	NO
Spen	9.85496	22.217	NO	NO	NO		Prss36	1.4046	2.68106	NO	NO	NO
Zfp654	1.67907	3.34041	NO	NO	NO		Zfp873	0.454554	0.840327	NO	NO	NO
Rundc3b	0.592522	0.955247	NO	NO	NO		Mmp28	0.668758	1.064	NO	NO	NO
Slc30a3	0.667003	1.70073	NO	NO	NO		Klk1	0.298935	1.23414	NO	NO	NO
Jakmip1	0.304794	1.31625	NO	NO	NO		Klk1	0.309118	1.27618	NO	NO	NO
Ulk1	25.5337	47.1386	NO	NO	NO		Setdb2	2.8135	4.85021	NO	NO	NO
Abcc10	1.53073	3.52638	NO	NO	NO		Setdb2	2.82473	4.88468	NO	NO	NO
Mmab	2.40951	4.49225	NO	NO	NO		Gm45935	2.12217	3.78471	NO	NO	NO
Crb3	4.15086	9.35255	NO	NO	NO		Klk8	4.78176	8.12727	NO	NO	NO
Dcbld1	3.28962	8.58995	NO	NO	NO		6720489N17Rik	0.342262	0.651304	NO	NO	NO
Med13l	11.6043	22.1135	NO	NO	NO		Sycp2l	0.0845223	0.29414	NO	NO	NO
Ndufb8	11.3982	22.5522	NO	NO	NO		Slc6a16	0.248741	1.59635	NO	NO	NO
Oas2	13.8558	52.3566	NO	NO	NO		Zfp990	11.2867	19.683	NO	NO	NO
Rad51ap1	7.09223	12.6646	NO	NO	NO		Tipin	25.3	46.5277	NO	NO	NO
Akap7	1.47702	3.63809	NO	NO	NO		Tipin	25.2178	46.3766	NO	NO	NO
Nt5dc1	3.06281	5.47915	Yes	Yes	Yes		Tipin	25.2315	46.4018	NO	NO	NO
Tmtc1	0.228822	0.86972	NO	Yes	NO		Adamts8	0.21045	0.530185	NO	NO	NO
Slc8a2	0.605488	1.28077	NO	NO	NO		Suclg2	3.36665	6.62865	Yes	Yes	Yes
Lmntd2	0.905016	1.90205	NO	NO	NO		Zfp354a	0.295234	0.570032	NO	NO	NO
Fbxl3	7.8294	21.7499	NO	NO	NO		Clgn	1.85083	3.96421	NO	NO	NO
Bahcc1	4.21142	8.75609	NO	NO	NO		Clgn	1.78978	3.84097	NO	NO	NO
Lmo7	1.9593	4.3601	Yes	Yes	Yes		Habp2	0.0862312	0.838793	NO	NO	NO
Ybx2	1.63891	10.1965	NO	NO	NO		Habp2	0.0721517	0.745673	NO	NO	NO
Atxn2l	71.3665	143.553	NO	NO	NO		Cradd	4.23547	6.86632	NO	NO	NO
Ksr1	1.99513	3.36939	NO	NO	NO		Cradd	4.50332	7.31614	NO	NO	NO
Pycr1	3.88496	19.2796	NO	NO	NO		Cradd	4.49256	7.27765	NO	NO	NO
Ptprd	0.164549	0.324478	Yes	Yes	Yes		Tra2b	7.39663	12.5286	NO	NO	NO
Yjefn3	0.729772	2.49927	NO	NO	NO		Tra2b	7.57579	12.5163	NO	NO	NO
Gm10509	0.156027	0.412904	NO	NO	NO		Smim8	4.35078	7.23307	NO	NO	NO
Map4k1	3.99316	7.21225	NO	NO	NO		Smim8	5.02171	8.33156	NO	NO	NO
Sigirr	2.61971	7.29914	NO	NO	NO		Smim8	5.39185	8.95401	NO	NO	NO
Ckmt1	4.20118	14.5043	NO	NO	NO		Zfand1	1.5956	2.54142	NO	NO	NO
Eri2	1.94166	4.24344	NO	Yes	NO		Zfand1	1.48742	2.38214	NO	NO	NO
Paqr8	0.667742	1.12865	NO	NO	NO		Abhd6	1.57575	2.60916	NO	NO	NO
Cyb5r1	24.7009	47.6548	NO	NO	NO		Abhd6	1.72885	2.86145	NO	NO	NO
Plcb4	3.56092	6.29251	Yes	Yes	Yes		Aldh3a1	0.37694	0.855628	NO	NO	NO
Nuf2	5.27769	8.60251	NO	Yes	NO		Alox12	0.326292	0.789356	NO	NO	NO
Slc6a9	1.52736	4.33816	NO	NO	NO		B230311B06Rik	0.445274	1.34886	NO	NO	NO
Garnl3	1.95861	5.5332	NO	NO	NO		B230311B06Rik	0.51269	1.53191	NO	NO	NO
Strbp	1.76461	3.70001	NO	NO	NO		B230311B06Rik	0.42159	1.23278	NO	NO	NO
Bcar3	3.91484	10.7139	NO	NO	NO		B230311B06Rik	0.42394	1.28423	NO	NO	NO
Rif1	9.62535	15.4722	NO	NO	NO		Bmf	1.50516	2.75532	NO	NO	NO
Ccnl1	35.0832	56.528	NO	NO	NO		Glrb	0.210512	0.442413	Yes	Yes	Yes
Epb41l4b	0.321896	1.24191	NO	NO	NO		Glrb	0.211953	0.445442	Yes	Yes	Yes
Extl1	0.527283	3.06971	NO	NO	NO		Glrb	0.212161	0.445878	Yes	Yes	Yes
Rps21	58.3273	100.852	NO	NO	NO		Glrb	0.212438	0.446461	Yes	Yes	Yes
Naga	7.96713	14.5544	NO	NO	NO		Glrb	0.211603	0.424093	Yes	Yes	Yes
Top1mt	3.41396	5.53701	NO	NO	NO		Fam111a	6.54624	14.8416	NO	NO	NO
Klf15	0.455714	1.47508	NO	NO	NO		Zfp33b	4.24191	8.35705	NO	NO	NO
Ddx5	42.5295	72.7952	NO	NO	NO		Zfp33b	4.25985	8.34885	NO	NO	NO
Syt2	0.00894883	0.155833	NO	NO	NO		Col26a1	0.119674	0.380816	NO	NO	NO
Spidr	6.83418	12.9765	NO	NO	NO		Tet2	5.35154	16.9505	NO	NO	NO
Nphp4	1.22394	3.90941	NO	NO	NO		Pyy	0.0177389	0.675757	NO	NO	NO
Myl4	0.518483	8.27107	NO	NO	NO		Akap11	5.34469	11.1163	NO	NO	NO
Tmeff1	13.9966	26.1923	NO	NO	NO		Cyp11a1	0.482619	2.46008	NO	NO	NO
Ptk6	0.0136883	0.171159	NO	NO	NO		Zfp707	1.43731	2.99814	NO	NO	NO
Ssr2	142.087	283.928	NO	NO	NO		H2az2	13.4855	25.5794	NO	NO	NO
Mpp2	1.65659	2.74895	NO	NO	NO		Tmem209	12.8562	30.4134	NO	NO	NO
Coq3	2.36069	3.80381	NO	NO	NO		Acot11	0.588603	1.07387	NO	NO	NO
Cyb561	1.70877	3.6503	NO	NO	NO		Elavl4	0.171067	0.360029	Yes	Yes	Yes
Dennd2c	4.55347	7.49716	NO	NO	NO		Eif4a2	26.2636	57.2932	NO	NO	NO
Slc2a8	4.22125	7.41912	NO	NO	NO		S100pbp	6.71782	11.0539	NO	NO	NO
Sec61a2	9.35127	15.9073	NO	NO	NO		Nipal3	1.32264	2.55181	NO	NO	NO
Aldh1l1	1.35799	4.02404	NO	NO	NO		Rpl22l1	5.29303	9.96716	NO	NO	NO
Oscp1	0.343438	0.606281	NO	NO	NO		Zfp654	1.67907	3.25457	NO	NO	NO
Kcnc4	0.0578632	0.757369	NO	NO	NO		Vwa7	0.12513	0.378708	NO	NO	NO
Susd4	1.07261	4.45965	NO	NO	NO		Jakmip1	0.304794	0.618701	NO	NO	NO
Kyat1	2.36898	4.4234	NO	NO	NO		Fancd2	5.40261	10.9365	NO	NO	NO
Dennd4b	2.22751	3.67867	NO	NO	NO		Atp2b2	0.0178056	0.120219	NO	NO	NO
Optn	2.53876	5.06278	NO	NO	NO		Abcc10	1.53073	2.64482	NO	NO	NO
Ift52	8.76127	16.8618	NO	NO	NO		Dcbld1	3.28962	9.99368	NO	NO	NO
Agbl2	0.127512	0.357077	NO	NO	NO		Oas2	13.8558	28.8459	NO	NO	NO
Prkaa2	0.699507	2.20971	NO	Yes	NO		Rad51ap1	7.09223	13.1843	NO	NO	NO
Amhr2	0.703419	2.45481	NO	NO	NO		Hnrnph3	7.26551	13.4262	NO	NO	NO
Crtac1	0.161843	2.64383	NO	NO	NO		Akap7	1.47702	3.72708	NO	NO	NO
Taf6	21.2321	36.7647	NO	NO	NO		Lama3	0.567245	1.67013	NO	NO	NO
Slc25a28	11.3071	20.2637	NO	NO	NO		Adgrd1	0.0943536	0.79334	NO	NO	NO
Ppp6r2	2.06629	3.97784	NO	NO	NO		Zfp354a	0.305893	0.576117	NO	NO	NO
Smc4	11.6589	22.0065	NO	NO	NO		Tmtc1	0.228822	0.481897	NO	Yes	NO
Eif2s3y	5.99383	11.2764	NO	NO	NO		Grid2ip	0.0899743	0.240056	NO	NO	NO
Dop1b	3.63123	7.97292	NO	NO	NO		Lmntd2	0.905016	1.67254	NO	NO	NO
Slc25a27	0.164563	0.325072	NO	NO	NO		Dock9	2.10309	4.7465	NO	NO	NO
Mettl4	2.13152	3.75819	NO	NO	NO		Fbxl3	7.8294	13.9784	NO	NO	NO
Flywch2	5.18421	11.3606	NO	NO	NO		Fbxl3	7.82049	13.9961	NO	NO	NO
Kank3	5.20574	13.4337	NO	NO	NO		Urah	13.5407	24.0134	NO	NO	NO
Klf8	1.71536	5.52398	NO	NO	NO		Ybx2	1.63891	2.92429	NO	NO	NO
Adat1	1.25904	2.03987	NO	NO	NO		Mylpf	47.7449	81.5668	NO	NO	NO
Herpud1	6.17831	10.2909	NO	NO	NO		Pycr1	3.88496	6.55792	NO	NO	NO
Kcng4	0.00254854	0.136346	NO	NO	NO		Ankrd49	3.98388	6.69604	NO	NO	NO
Cfap97	1.45634	2.51657	NO	NO	NO		Trpa1	0.135147	0.385691	Yes	Yes	Yes
Dusp26	0.239919	0.719481	NO	NO	NO		Ddx11	5.78043	9.18715	NO	NO	NO
Nutf2	3.57292	6.01639	NO	NO	NO		Smim27	2.04029	4.22289	NO	NO	NO
Spata6	6.71064	11.2337	Yes	Yes	Yes		Ptprd	0.164549	0.310107	Yes	Yes	Yes
Zdhhc2	1.0154	1.76052	NO	Yes	NO		Ptprd	0.165297	0.311517	Yes	Yes	Yes
1700030J22Rik	0.863102	1.44422	NO	NO	NO		Ptprd	0.165356	0.311629	Yes	Yes	Yes
Igdcc3	3.65231	6.33822	NO	NO	NO		Eif1ad16	0.0769373	0.966857	NO	NO	NO
Sorl1	2.63848	9.64226	NO	NO	NO		Atp9a	3.37155	5.36315	NO	NO	NO
Arih2	7.76699	13.3359	NO	NO	NO		Atp9a	3.15545	5.01939	NO	NO	NO
Spc24	8.06737	13.0913	NO	NO	NO		Mttp	0.51024	1.17806	NO	NO	NO
Carmil2	1.44865	4.46729	NO	NO	NO		Mttp	0.50614	1.1686	NO	NO	NO
Dbt	3.97911	7.7836	NO	NO	NO		Map4k1	3.99316	7.73787	NO	NO	NO
Adhfe1	0.297546	0.843578	NO	NO	NO		Sigirr	2.61971	7.44317	NO	NO	NO
Tmem44	0.573449	1.22311	NO	NO	NO		Ckmt1	4.20118	11.8886	NO	NO	NO
Cggbp1	14.6644	29.0451	NO	NO	NO		Eri2	1.94166	4.75702	NO	Yes	NO
P4htm	0.337091	1.7187	NO	NO	NO		Cyb5r1	24.7009	40.8621	NO	NO	NO
Mei4	0.502303	1.01876	Yes	Yes	Yes		Plcb4	3.56092	7.02733	Yes	Yes	Yes
Pm20d1	0.365293	1.08161	NO	NO	NO		Plcb4	3.53184	6.98135	Yes	Yes	Yes
Rbbp5	9.63821	19.9977	NO	NO	NO		Plcb4	3.52193	6.97853	Yes	Yes	Yes
Csnk1a1	36.5887	63.465	NO	NO	NO		Plcb4	3.57602	6.98911	Yes	Yes	Yes
Zbtb7c	0.177992	3.79426	NO	NO	NO		Fbxo27	0.753282	1.86417	NO	NO	NO
Tbc1d8	2.76688	6.2975	NO	NO	NO		Nuf2	5.27769	9.15509	NO	Yes	NO
Pif1	2.64829	4.57969	NO	NO	NO		Scn3a	0.0743026	0.164944	Yes	Yes	Yes
Abcc8	0.0601257	0.169209	NO	NO	NO		Scn3a	0.0746963	0.165818	Yes	Yes	Yes
Rpl10a	16.573	44.2449	NO	NO	NO		Scn3a	0.0753775	0.16733	Yes	Yes	Yes
Olfm2	0.450149	3.02637	NO	NO	NO		Scn3a	0.0753775	0.16733	Yes	Yes	Yes
Gpatch2	2.80963	5.35294	NO	Yes	NO		Scn3a	0.0754486	0.167488	Yes	Yes	Yes
Cryz	5.86306	10.3929	NO	NO	NO		Scn3a	0.0753459	0.16726	Yes	Yes	Yes
Zfp40	0.278976	0.505117	Yes	Yes	Yes		Prkcz	0.871143	1.66168	NO	NO	NO
Tdrkh	0.59895	1.57542	NO	NO	NO		Ctcfl	0.113321	0.349421	NO	NO	NO
Map3k4	5.37057	11.9799	NO	NO	NO		Bcar3	3.91484	8.82472	NO	NO	NO
Mpzl2	3.33837	8.744	NO	NO	NO		Cdsn	0.565842	0.946379	NO	NO	NO
Tnfrsf13c	0.0839393	1.2584	NO	NO	NO		Fsd1l	0.928139	1.60616	NO	NO	NO
Catsperd	0.293333	1.20868	NO	NO	NO		Rps28	0.628901	1.78579	NO	NO	NO
Gm1070	0.166689	0.495059	NO	NO	NO		Zkscan16	0.0375036	0.105002	NO	NO	NO
Kdm4b	4.23084	7.99859	NO	NO	NO		Rif1	9.62535	17.3242	NO	NO	NO
Lrrc75a	2.17907	5.10204	NO	NO	NO		Rif1	9.64037	17.3518	NO	NO	NO
Wscd1	0.853811	2.83341	NO	NO	NO		Polr1h	26.5406	45.7943	NO	NO	NO
Gm38396	2.2791	4.32637	NO	NO	NO		Pdss1	2.86189	4.74264	NO	NO	NO
Gm7072	0.786137	1.45945	NO	NO	NO		Epb41l4b	0.321896	0.668886	NO	NO	NO
Aars2	5.36001	8.65148	NO	NO	NO		Extl1	0.527283	1.60493	NO	NO	NO
Slc9b1	2.68053	5.37064	NO	NO	NO		Wdr31	2.05284	3.40784	NO	NO	NO
Slc38a4	31.4809	54.4692	NO	NO	NO		Mindy3	8.1748	13.0156	Yes	Yes	Yes
Armh4	1.56879	2.85383	NO	Yes	NO		Mindy3	7.93994	12.8741	Yes	Yes	Yes
Fam241b	0.860913	3.89154	NO	NO	NO		Mindy3	8.018	13.0427	Yes	Yes	Yes
Fam161b	0.43455	0.931377	NO	NO	NO		Mindy3	8.18304	13.5153	Yes	Yes	Yes
Cfap300	1.60515	2.64811	NO	NO	NO		Mindy3	7.86419	13.0448	Yes	Yes	Yes
Brd8dc	0.0731269	0.276819	NO	NO	NO		Dph7	4.14809	6.94309	NO	NO	NO
Vpreb3	0.542996	2.16606	NO	NO	NO		Dph7	3.71155	6.22126	NO	NO	NO
Ndufb11	16.8097	29.7544	NO	NO	NO		Dph7	3.81093	6.26483	NO	NO	NO
Elfn2	0.0259681	0.157717	NO	NO	NO		Dph7	4.23912	6.89414	NO	NO	NO
Madcam1	0.454453	2.15431	NO	NO	NO		Dph7	4.09433	6.79526	NO	NO	NO
Septin3	2.63395	4.42003	NO	NO	NO		Dph7	4.18699	6.80936	NO	NO	NO
Gnaz	0.984106	2.97639	NO	NO	NO		Dscc1	2.55488	5.55372	NO	NO	NO
Zfp14	0.28733	0.681824	NO	NO	NO		9930104L06Rik	1.67226	2.72668	NO	NO	NO
Usp11	5.66667	25.7019	NO	NO	NO		9930104L06Rik	1.67403	2.72956	NO	NO	NO
Hap1	5.86341	37.0961	NO	NO	NO		Casq2	0.156502	0.50875	NO	NO	NO
Slc2a4	0.226131	1.08681	NO	NO	NO		Klf15	0.455714	0.832099	NO	NO	NO
Csad	5.9479	10.1388	NO	NO	NO		Nsun6	0.510013	0.8556	Yes	Yes	Yes
Cars2	6.11405	9.85169	NO	NO	NO		Syt2	0.00894883	0.185938	NO	NO	NO
Svop	0.612637	1.11588	NO	NO	NO		Nphp4	1.22394	2.09165	NO	NO	NO
Mlxipl	1.12118	3.86008	NO	NO	NO		Nphp4	1.19537	2.04547	NO	NO	NO
Scml4	0.0283963	0.194787	NO	NO	NO		Adal	3.10375	5.83495	NO	NO	NO
Rev1	7.36892	12.5443	NO	NO	NO		Myl4	0.518483	9.85823	NO	NO	NO
Afg1l	2.045	4.29459	NO	NO	NO		Myl4	0.542896	10.3224	NO	NO	NO
Rtkn2	1.52052	4.17583	NO	NO	NO		Tmeff1	13.9966	25.783	NO	NO	NO
Tpd52l1	5.3873	9.88924	Yes	Yes	Yes		Tbc1d31	4.30346	7.54765	NO	NO	NO
Fam229b	0.751331	1.79046	NO	NO	NO		Espl1	13.3138	24.0872	NO	NO	NO
Tmem108	0.754979	4.75849	NO	NO	NO		Ssr2	142.087	257.196	NO	NO	NO
Zbtb49	0.944715	1.72268	NO	NO	NO		Ssr2	146.515	265.15	NO	NO	NO
Mtus2	0.451515	1.33976	NO	NO	NO		Ssr2	147.317	266.647	NO	NO	NO
Rbm5	14.9965	25.9815	NO	NO	NO		Ssr2	143.067	259.823	NO	NO	NO
Pitpnc1	8.8419	17.5674	NO	NO	NO		Coq3	2.36069	4.06471	NO	NO	NO
8030474K03Rik	0.697087	8.58843	NO	NO	NO		Map2k6	2.91944	4.68478	Yes	Yes	Yes
Lrp11	7.0145	11.3133	NO	NO	NO		Btf3l4	0.540064	0.918228	NO	NO	NO
Adgrb1	0.580738	5.98742	NO	NO	NO		Cyb561	1.70877	2.78107	NO	NO	NO
Hscb	5.97385	16.1153	NO	NO	NO		Fam205c	0	0.0933344	NO	NO	NO
Hps4	3.4658	7.04248	NO	NO	NO		Fam205c	0	0.0999249	NO	NO	NO
Nudt13	0.943169	1.79023	NO	NO	NO		Aldh1l1	1.35799	2.55976	NO	NO	NO
Zc3h13	7.86164	21.676	NO	NO	NO		Cryzl2	1.4998	2.54713	NO	Yes	NO
Elapor2	0.0957191	0.534963	Yes	Yes	Yes		Cryzl2	1.58884	2.68635	NO	Yes	NO
Galnt11	6.97599	11.8169	NO	NO	NO		Usp1	10.968	19.8518	NO	Yes	NO
Slc7a4	0.360002	0.674688	NO	NO	NO		Dzip3	1.4066	2.42023	Yes	Yes	Yes
Zfp445	4.67527	8.47326	NO	NO	NO		Kcnc4	0.0578632	0.231161	NO	NO	NO
Oasl1	6.34795	23.0969	NO	NO	NO		Ndufaf1	4.78894	7.79885	NO	NO	NO
Sfswap	13.4278	24.0017	NO	NO	NO		Kyat1	2.36898	4.4117	NO	NO	NO
Hnrnpa3	0.378477	0.855845	NO	NO	NO		Kyat1	2.25162	4.2169	NO	NO	NO
Zfp512	5.68589	9.96932	NO	NO	NO		Dusp12	7.67982	12.6431	NO	NO	NO
Ppp2r2c	1.91949	5.36485	NO	NO	NO		Dusp12	7.90746	12.8509	NO	NO	NO
Ccdc60	0.267689	0.765542	NO	NO	NO		Apmap	3.2581	6.11248	NO	Yes	NO
Cdkn3	4.70706	8.46515	NO	NO	NO		Apmap	3.10233	5.85178	NO	Yes	NO
Dis3	22.1343	49.304	NO	NO	NO		Pecr	6.90354	13.8096	NO	NO	NO
Ap5m1	2.124	4.62854	NO	NO	NO		Ift52	8.76127	15.2372	NO	NO	NO
Shld2	1.7298	3.94932	NO	NO	NO		Ankrd35	0.350344	0.770898	NO	NO	NO
Frmd5	1.1142	1.8267	NO	NO	NO		Ankrd35	0.360464	0.776639	NO	NO	NO
Zfp959	0.867665	1.55661	Yes	Yes	Yes		Ankrd35	0.349944	0.770017	NO	NO	NO
Cpne5	2.66753	5.86126	NO	NO	NO		Pramel6	0.092757	0.374501	NO	NO	NO
Bbs9	1.87242	4.58195	NO	Yes	NO		Pramel6	0.102313	0.413082	NO	NO	NO
Rabggta	9.1756	15.0366	NO	NO	NO		Pramel6	0.0998601	0.429087	NO	NO	NO
Rec8	4.01415	6.81971	NO	NO	NO		Kdm4c	9.77511	17.4663	NO	NO	NO
Dzip1	3.28714	7.73869	NO	NO	NO		Prkaa2	0.699507	1.33863	NO	Yes	NO
Dclre1a	2.66843	4.3517	NO	NO	NO		Amhr2	0.703419	1.69589	NO	NO	NO
Morn2	3.11704	5.71184	NO	NO	NO		Mcm7	58.0621	95.2538	NO	NO	NO
Zfp235	0.416951	0.724376	NO	NO	NO		Mcm7	50.1358	82.232	NO	NO	NO
Caskin1	0.60099	1.30675	NO	NO	NO		Crtac1	0.161843	1.11805	NO	NO	NO
Zfp799	0.717262	1.45824	NO	NO	NO		Crtac1	0.168325	1.14788	NO	NO	NO
H2-DMa	0.997682	1.95469	NO	NO	NO		Ube2d3	18.7299	30.0625	NO	NO	NO
Ocln	0.507368	1.48548	NO	NO	NO		Ube2d3	18.7615	30.0954	NO	NO	NO
Cab39l	5.5518	9.69728	NO	NO	NO		Ube2d3	18.8663	30.1616	NO	NO	NO
Tmtc4	1.98415	4.91068	Yes	Yes	Yes		Ube2d3	18.6537	29.7318	NO	NO	NO
Ipo5	75.6836	129.673	NO	NO	NO		Tars2	11.191	18.1635	NO	NO	NO
Rcbtb1	7.62983	14.6172	NO	NO	NO		Tars2	10.8166	17.3125	NO	NO	NO
Rplp2	52.7825	100.303	NO	NO	NO		Tars2	11.1858	18.0762	NO	NO	NO
Zfp788	1.09061	1.94906	NO	Yes	NO		Smc4	11.6589	18.8873	NO	NO	NO
Slc12a7	11.6768	25.2026	NO	NO	NO		Uba1y	0.137614	0.414698	NO	NO	NO
Chmp2a	26.3873	42.4817	NO	NO	NO		Eif2s3y	5.99383	9.57969	NO	NO	NO
Ccp110	4.90417	9.70188	NO	NO	NO		Mettl4	2.13152	3.79902	NO	NO	NO
Rprd1a	2.70487	6.48984	NO	NO	NO		Mettl4	2.1355	3.78907	NO	NO	NO
Msc	0.862426	3.19563	NO	Yes	NO		Mettl4	2.14156	3.8189	NO	NO	NO
Rnf2	13.5351	23.7172	NO	NO	NO		Mettl4	2.14565	3.80901	NO	NO	NO
Zfp184	2.14149	3.50967	NO	NO	NO		Gpr160	0.779179	2.53043	NO	NO	NO
Kif27	0.0525415	0.191046	NO	NO	NO		Kank3	5.20574	8.88009	NO	NO	NO
Zfp553	12.2919	30.5714	NO	NO	NO		Klf8	1.71536	5.85315	NO	NO	NO
Gpa33	16.0177	32.7791	NO	NO	NO		Elavl4	0.164604	0.346427	Yes	Yes	Yes
Mapk4	1.46052	2.53768	NO	NO	NO		Herpud1	6.17831	10.2888	NO	NO	NO
Phf10	7.23831	14.9607	NO	NO	NO		Kcng4	0.00254854	0.103946	NO	NO	NO
Arhgap26	0.358433	1.33141	NO	Yes	NO		Nutf2	3.57292	6.05771	NO	NO	NO
Gm18905	0.0583235	0.319569	NO	NO	NO		Nutf2	3.4219	5.8493	NO	NO	NO
Gm15246	0.347021	2.35335	NO	NO	NO		1700018B08Rik	0.0277711	0.359989	NO	NO	NO
Acan	0.15983	0.689478	NO	NO	NO		1700018B08Rik	0.0278738	0.36132	NO	NO	NO
4933427D14Rik	1.43785	2.75378	NO	NO	NO		Sorl1	2.63848	7.15405	NO	NO	NO
Tdrp	3.78411	12.3454	NO	NO	NO		Carmil2	1.44865	3.23361	NO	NO	NO
Slain1	3.21961	10.4588	NO	Yes	NO		Mme	1.77661	7.99143	NO	Yes	NO
Dmac2l	1.2599	2.76345	NO	NO	NO		Dbt	3.97911	7.22086	NO	NO	NO
Tmem63c	0.131033	1.66346	NO	NO	NO		Zfp948	1.66764	3.53091	Yes	Yes	Yes
Plcd3	2.24155	5.46027	NO	NO	NO		Exoc3l	3.64555	11.8804	NO	NO	NO
Pdk2	2.30914	4.39205	NO	NO	NO		Cggbp1	14.6644	28.1765	NO	NO	NO
Pold2	40.0407	73.3669	NO	NO	NO		Ildr2	0.134841	0.306283	NO	NO	NO
Gstp3	1.51121	4.42514	NO	NO	NO		Ildr2	0.136976	0.307762	NO	NO	NO
Fam234b	1.04088	5.13768	NO	NO	NO		Ildr2	0.139164	0.308858	NO	NO	NO
Zfp977	0.76675	1.4295	NO	NO	NO		Ildr2	0.136008	0.307172	NO	NO	NO
Tarm1	1.86053	3.44759	NO	NO	NO		Ildr2	0.146889	0.324047	NO	NO	NO
Abtb1	4.84357	9.73814	NO	NO	NO		Cpne4	0.00294156	0.0964054	Yes	Yes	Yes
Gm5165	0.950232	1.79875	NO	NO	NO		Rlbp1	0.806411	2.08091	NO	NO	NO
Atad2b	2.53304	6.27254	NO	NO	NO		Dclk2	3.05415	5.02209	NO	NO	NO
Tert	2.03604	3.90061	NO	NO	NO		Pm20d1	0.365293	0.695145	NO	NO	NO
Otop2	0.0395522	0.183793	NO	NO	NO		Mei4	0.378786	0.653074	Yes	Yes	Yes
Sncb	0.423255	1.82849	NO	NO	NO		Rbbp5	9.63821	16.2372	NO	NO	NO
Klhl3	0.117222	0.23235	NO	NO	NO		Rbbp5	9.32787	15.7183	NO	NO	NO
Plaat3	1.17847	2.75938	NO	NO	NO		Mreg	9.94007	28.4414	NO	NO	NO
Gm550	0.555811	2.22484	NO	NO	NO		Zbtb7c	0.177992	1.75087	NO	NO	NO
Pigt	10.987	20.3721	NO	NO	NO		Xrcc5	22.9165	40.8774	NO	NO	NO
Knl1	1.90272	3.6084	NO	NO	NO		Xrcc5	22.949	40.9354	NO	NO	NO
Slc34a3	0.192288	0.700399	NO	NO	NO		Tmem266	0.390236	0.810731	NO	NO	NO
Dgke	2.09387	5.24038	NO	NO	NO		Rpl10a	16.573	27.7521	NO	NO	NO
Ranbp17	4.43024	7.31464	NO	NO	NO		Rapgef3	1.01237	3.95279	NO	NO	NO
Rnf212	0	0.22175	NO	NO	NO		Olfm2	0.450149	1.21623	NO	NO	NO
Hmx1	0.00846206	0.292655	NO	NO	NO		Satb1	0.503995	1.75732	Yes	Yes	Yes
Odad4	0.161687	0.696538	NO	NO	NO		Satb1	0.506981	1.7786	Yes	Yes	Yes
Lyrm7	0.394111	0.747804	NO	NO	NO		Satb1	0.505881	1.77474	Yes	Yes	Yes
Sfi1	1.36472	2.72626	NO	NO	NO		Olfm2	0.507	1.36299	NO	NO	NO
Pdgfa	17.9438	32.326	NO	NO	NO		Satb1	0.489342	1.68067	Yes	Yes	Yes
Ppp4r3b	5.70125	10.0879	NO	NO	NO		Sgsm3	4.14269	7.12328	NO	NO	NO
Rnf43	0.119027	0.350023	NO	NO	NO		Tcp11	1.51016	2.53429	NO	NO	NO
Hmgb2	1.75895	4.14761	NO	NO	NO		Dhx32	9.95584	17.353	NO	NO	NO
Sepsecs	1.37987	2.40415	NO	NO	NO		Tdrkh	0.59895	1.06984	NO	NO	NO
Ppp1r9a	0.952126	2.99399	NO	NO	NO		Tdrkh	0.572997	1.02968	NO	NO	NO
Clpb	5.96331	10.7702	NO	NO	NO		Tdrkh	1.36668	2.55182	NO	NO	NO
Zfp286	0.64537	1.32158	NO	NO	NO		Tdrkh	1.31957	2.41546	NO	NO	NO
Odad1	2.9964	5.08446	NO	NO	NO		Mpzl2	3.33837	8.05741	NO	NO	NO
Piwil2	0.750911	4.26507	NO	NO	NO		Atl2	6.63995	10.9178	NO	NO	NO
Mlycd	1.29528	4.30923	NO	NO	NO		Atl2	7.44477	12.2597	NO	NO	NO
Acyp1	2.8368	5.32705	NO	NO	NO		Tnfrsf13c	0.0839393	0.402496	NO	NO	NO
Phkb	2.75391	6.41195	NO	NO	NO		6030458C11Rik	4.0808	6.70959	NO	NO	NO
Colgalt1	22.5066	37.9315	NO	NO	NO		Snap91	0.112672	0.379723	Yes	Yes	Yes
Ppp1r3b	0.376616	0.855008	NO	NO	NO		Snap91	0.115436	0.38904	Yes	Yes	Yes
Pts	2.79842	4.89898	NO	NO	NO		Snap91	0.120119	0.395831	Yes	Yes	Yes
Zfp420	0.41728	1.21824	NO	NO	NO		Gng13	3.17578	8.69276	NO	NO	NO
Plagl1	1.3494	3.46744	NO	NO	NO		Cyp4f14	0.0103304	0.260092	NO	NO	NO
Rab44	0.05287	0.294063	NO	NO	NO		Spats1	0.595824	1.36555	NO	NO	NO
Mlc1	0.0221959	0.228206	NO	NO	NO		Spats1	0.57381	1.38905	NO	NO	NO
Gnmt	0.716701	1.55491	NO	NO	NO		Gm973	0.182254	0.405798	NO	NO	NO
Igfals	0.165239	1.30181	NO	NO	NO		Oard1	12.0438	20.5632	NO	NO	NO
Polh	1.85562	3.12211	NO	NO	NO		Oard1	14.8486	25.236	NO	NO	NO
Ppargc1b	0.399271	0.931706	NO	NO	NO		Gm1070	0.166689	0.932946	NO	NO	NO
Lims2	1.02193	1.84892	NO	NO	NO		Ppcdc	0.340697	0.740351	NO	NO	NO
Tctn3	1.81404	3.10834	NO	NO	NO		Ankrd33b	1.15162	4.16483	NO	NO	NO
Glce	3.76403	7.25032	NO	NO	NO		Ankrd33b	1.1336	4.0935	NO	NO	NO
Dtx3	12.8074	23.1927	NO	NO	NO		Wscd1	0.853811	1.43837	NO	NO	NO
Tmem59l	1.59611	3.13132	NO	NO	NO		Lysmd4	0.13151	0.619292	NO	NO	NO
Pex11g	0.284024	0.794742	NO	NO	NO		Wscd1	0.802241	1.36341	NO	NO	NO
Nudt12	0.326181	1.22878	Yes	Yes	Yes		Gm38396	2.2791	5.4541	NO	NO	NO
Polr1has	2.87563	5.62779	NO	NO	NO		Aars2	5.36001	8.74477	NO	NO	NO
Katnal2	0.274082	0.735925	NO	NO	NO		Kmt5c	15.5437	25.7133	NO	NO	NO
Osr2	3.61932	6.97553	NO	NO	NO		Wdr47	2.27082	3.88076	NO	NO	NO
Coro6	0.47771	0.940179	NO	NO	NO		Wdr47	2.26098	3.87541	NO	NO	NO
Rbm26	9.35306	24.9671	NO	NO	NO		Wdr47	2.24557	3.81515	NO	NO	NO
H2-Q2	0.111945	0.557648	NO	NO	NO		Slc9b1	2.68053	6.11845	NO	NO	NO
Pax2	0.0246622	0.310428	NO	NO	NO		Cdc45	11.7708	22.3959	NO	NO	NO
Arhgef38	0.0803984	0.250348	Yes	Yes	Yes		Fam241b	0.860913	2.60494	NO	NO	NO
Arhgef4	0.514368	1.28804	NO	NO	NO		Fam241b	0.730216	2.17885	NO	NO	NO
Dlec1	0.082052	0.328154	NO	NO	NO		Shld1	2.21301	3.65073	NO	NO	NO
Piwil4	0.197544	0.876865	NO	NO	NO		Shld1	2.17045	3.58053	NO	NO	NO
Prdm11	0.174233	0.333522	NO	NO	NO		4930519F16Rik	0.220932	0.60849	NO	NO	NO
Grtp1	6.77687	27.8271	NO	NO	NO		B3galt5	0	0.0594212	NO	NO	NO
Dab1	0.796968	1.91376	Yes	Yes	Yes		B3galt5	0	0.0615499	NO	NO	NO
Pnisr	11.3385	20.0434	NO	NO	NO		Vpreb3	0.542996	1.68235	NO	NO	NO
Tle7	0.0574488	0.681751	NO	NO	NO		Lifr	2.04691	3.66302	NO	NO	NO
Shoc1	0.0205595	0.29456	NO	NO	NO		Zfp740	12.4702	21.5925	NO	NO	NO
Gm38999	0.205593	1.76139	NO	NO	NO		Pan2	7.35003	11.8439	NO	NO	NO
Gm36210	0.244313	1.12264	NO	NO	NO		Mical1	4.66053	7.92222	NO	NO	NO
Rnf212b	0.152801	1.55504	NO	NO	NO		Mical1	4.80573	8.20144	NO	NO	NO
Hmcn2	0.126843	0.35522	NO	NO	NO		Usp17lb	0.291457	2.82288	Yes	Yes	Yes
Gm13420	0.114346	0.276673	NO	NO	NO		Usp11	5.66667	11.7323	NO	NO	NO
Ankrd31	0.130453	0.699905	NO	NO	NO		Bclaf3	5.07143	8.71774	NO	NO	NO
Sptbn5	0.067029	0.215249	NO	NO	NO		Bclaf3	5.03539	8.67003	NO	NO	NO
Emid1	0.424321	3.90667	NO	NO	NO		Bclaf3	5.03987	8.68109	NO	NO	NO
Trpv3	0.0230556	0.108203	NO	NO	NO		Bclaf3	5.09162	8.71579	NO	NO	NO
Ly6g6d	0.407254	1.50324	NO	NO	NO		Slc25a15	4.49527	7.15893	NO	NO	NO
Sall1	23.7683	55.2844	NO	NO	NO		Mcf2	1.59712	3.75323	Yes	NO	NO
Pzp	0.0415901	0.175349	NO	NO	NO		Mcf2	1.61758	3.80131	Yes	NO	NO
Abca4	0.0321585	0.165614	NO	NO	NO		Mcf2	1.55707	3.79891	Yes	NO	NO
Acads	10.6266	18.4479	NO	NO	NO		Mcf2	1.59128	3.78039	Yes	NO	NO
Chrna7	0.719416	1.96993	Yes	Yes	Yes		Gabra1	0.0422091	0.319261	Yes	Yes	Yes
Acvr1b	4.02173	11.4071	NO	NO	NO		Fgfr3	0.190093	1.48103	NO	NO	NO
Gpr182	0.0827174	0.421739	NO	NO	NO		Fgfr3	0.188584	1.53248	NO	NO	NO
Adrb1	0.113273	0.540501	NO	NO	NO		Tmem29	3.57872	5.70923	NO	NO	NO
Nr0b1	37.4622	77.5567	Yes	Yes	Yes		Gjc1	17.6806	29.6569	NO	NO	NO
Alppl2	0.00469883	0.199909	NO	NO	NO		Hap1	5.86341	16.7402	NO	NO	NO
Aplp1	27.4181	52.1216	NO	NO	NO		Coprs	11.4337	19.381	NO	NO	NO
Aqp7	0.0242202	0.130727	NO	NO	NO		Mtf2	20.316	43.9802	NO	NO	NO
Atp2a1	0.0920385	0.259062	NO	NO	NO		Mtf2	20.1684	44.0679	NO	NO	NO
Atp7b	0.40191	1.57896	NO	NO	NO		Slc2a4	0.226131	0.521355	NO	NO	NO
Bard1	2.86241	6.04437	NO	NO	NO		Csad	5.9479	12.8042	NO	NO	NO
Barx1	0.210128	1.04502	NO	NO	NO		Csad	5.53997	13.0234	NO	NO	NO
Hrk	0.0641365	1.9328	NO	NO	NO		Csad	5.86996	12.6144	NO	NO	NO
Bik	0.626407	2.42556	NO	NO	NO		Rasal1	0.781563	1.3196	NO	NO	NO
Bmp6	0.485553	0.985787	NO	NO	NO		Rasal1	0.743508	1.25534	NO	NO	NO
Bmp7	0.526056	4.33928	NO	NO	NO		Rasal1	0.845084	1.45095	NO	NO	NO
Bsn	0.0834012	0.179555	NO	NO	NO		Rasal1	0.810585	1.39172	NO	NO	NO
Car5a	0.0248627	0.380316	NO	NO	NO		Rbpj	7.05743	11.8349	NO	NO	NO
Cckbr	0.0314168	0.237784	NO	NO	NO		Tfr2	0.100479	0.661294	NO	NO	NO
Ccnb2	27.2079	51.9176	NO	NO	NO		Hnrnph3	7.5481	13.8036	NO	NO	NO
Ccnf	38.0337	70.4397	NO	NO	NO		Hnrnph3	7.43504	13.1367	NO	NO	NO
Cd3e	0.18353	0.746528	NO	NO	NO		Coq8a	2.39284	4.83017	NO	NO	NO
Cd79a	0.335716	1.24663	NO	NO	NO		Coq8a	2.57976	5.27455	NO	NO	NO
Cd9	58.6163	115.184	NO	NO	NO		Rtkn2	1.52052	3.02196	NO	NO	NO
Cdk1	11.8404	19.7908	NO	NO	NO		Rtkn2	1.52149	3.03173	NO	NO	NO
Chek1	6.80656	11.8101	Yes	NO	NO		Gprasp2	1.25158	2.80412	NO	NO	NO
Chkb	6.5319	10.5358	NO	NO	NO		Fam229b	0.751331	2.18225	NO	NO	NO
Ovgp1	0.259464	1.77011	NO	NO	NO		Fam229b	0.705332	2.06572	NO	NO	NO
Cidea	0.149357	2.17944	NO	NO	NO		Fam229b	0.697737	2.02658	NO	NO	NO
Cit	3.0093	6.96871	NO	NO	NO		Fam229b	0.754612	2.19177	NO	NO	NO
Clcn3	5.5315	9.07698	NO	NO	NO		Fam229b	0.673271	2.00124	NO	NO	NO
Col9a2	1.20856	5.6616	NO	NO	NO		Tmem108	0.754979	3.49936	NO	NO	NO
Cplx1	0.363746	3.17699	NO	NO	NO		Actr6	3.31233	5.33614	NO	NO	NO
Cry1	7.11305	12.3541	NO	NO	NO		Actr6	3.4026	5.45185	NO	NO	NO
Dhh	0.0669771	0.208597	NO	NO	NO		Sun1	12.3673	21.9523	NO	NO	NO
Dffb	1.83445	3.6228	NO	NO	NO		Sun1	12.5415	22.2229	NO	NO	NO
Dlx4	0.099386	0.473801	NO	NO	NO		Mtus2	0.451515	1.28048	NO	NO	NO
Drd4	0.0473363	0.284933	NO	NO	NO		Mtus2	0.798539	2.39471	NO	NO	NO
Dsg2	2.51691	12.4256	NO	NO	NO		Mtus2	0.83369	2.52404	NO	NO	NO
Eif4ebp1	145.147	240.932	NO	NO	NO		Zfp454	1.03406	1.69572	NO	NO	NO
Eln	0.165505	0.471346	NO	NO	NO		Pitpnc1	8.8419	16.6056	NO	NO	NO
Epha4	3.78944	9.5853	NO	NO	NO		Mettl25	1.65321	2.8664	Yes	Yes	Yes
Epha8	0.175545	0.462872	NO	NO	NO		Mettl25	1.60041	2.74895	Yes	Yes	Yes
Ptprv	0.725837	1.43061	NO	NO	NO		8030474K03Rik	0.697087	3.38266	NO	NO	NO
Esx1	0.643246	1.44197	NO	NO	NO		Ccdc38	2.28929	3.72364	NO	NO	NO
Faf1	17.4149	28.0327	NO	NO	NO		Adgrb1	0.580738	1.92986	NO	NO	NO
Fbp2	0.209728	0.915685	NO	NO	NO		Urah	13.4212	23.5896	NO	NO	NO
Fdx1	2.28565	3.73337	NO	NO	NO		Foxred1	5.86808	10.1805	NO	NO	NO
Fdxr	3.61247	8.14786	NO	NO	NO		Rsrc2	15.1176	24.5763	NO	NO	NO
Fgf3	0.152192	0.8408	NO	NO	NO		Rsrc2	15.6948	25.5221	NO	NO	NO
Fgfr4	0.345814	2.29085	NO	NO	NO		Rsrc2	16.649	27.2671	NO	NO	NO
Foxm1	11.6943	24.5796	NO	NO	NO		Rsrc2	15.1444	24.6064	NO	NO	NO
Dtx1	3.95606	6.76578	NO	NO	NO		Rsrc2	15.7148	25.5547	NO	NO	NO
G0s2	0.0718937	3.15823	NO	NO	NO		Lcorl	1.24157	2.04736	Yes	Yes	Yes
B4galnt2	0.193644	3.61508	NO	NO	NO		Lcorl	1.22532	2.02422	Yes	Yes	Yes
Gcgr	0.0321278	0.286413	NO	NO	NO		Lcorl	1.24293	2.09449	Yes	Yes	Yes
Gcnt2	4.54943	9.68597	NO	NO	NO		Zc3h13	7.86164	17.6693	NO	NO	NO
Gdf9	0.124352	0.388675	NO	NO	NO		Elapor2	0.0957191	0.237745	Yes	Yes	Yes
Gja4	0.211341	0.838797	NO	NO	NO		Elapor2	0.0486254	0.113806	Yes	Yes	Yes
Gpr27	0.233294	1.60162	NO	NO	NO		Elapor2	0.095983	0.244898	Yes	Yes	Yes
Grid1	0.0950657	0.279833	Yes	Yes	Yes		Sh3tc1	1.63946	2.67419	NO	NO	NO
Grin2d	0.347896	0.920414	NO	NO	NO		Rpl15	9.85925	17.7615	NO	NO	NO
Gspt2	2.04367	3.60511	NO	NO	NO		Rpl15	9.87745	17.8694	NO	NO	NO
Gstm6	0.565231	1.22773	NO	NO	NO		Paqr3	0.871134	1.42833	NO	NO	NO
Guca1a	1.16242	2.94667	NO	NO	NO		Oasl1	6.34795	12.9862	NO	NO	NO
H1f0	26.1468	56.1837	NO	NO	NO		Oasl1	6.69149	13.7111	NO	NO	NO
H2-Bl	0.635784	5.10658	NO	NO	NO		Ccdc60	0.267689	0.640507	NO	NO	NO
H2-Oa	0.175306	1.31975	NO	NO	NO		Slc5a6	2.45874	4.06582	NO	NO	NO
H3f3b	73.1702	123.368	NO	NO	NO		Zcwpw1	3.50589	13.6922	NO	NO	NO
Hcn2	2.43428	7.31123	NO	NO	NO		Dis3	22.1343	62.5148	NO	NO	NO
Hcn3	0.4993	1.95531	NO	NO	NO		Dis3	21.3877	60.2749	NO	NO	NO
Foxj1	0.501239	1.92664	NO	NO	NO		Ap5m1	2.124	3.39373	NO	NO	NO
Foxd1	0.172708	0.495723	NO	NO	NO		Shld2	1.7298	3.49714	NO	NO	NO
Mst1	0.142556	0.944413	NO	NO	NO		Treml2	0.236659	1.43572	NO	NO	NO
Foxa1	0.190041	0.656254	NO	NO	NO		Zfp959	0.867665	1.57495	Yes	Yes	Yes
Foxa3	0.238528	0.554067	NO	NO	NO		Tnnt1	1.54591	2.72392	NO	NO	NO
Onecut1	0.0608987	0.301037	NO	NO	NO		Morc2b	0.0280585	0.112375	NO	NO	NO
Hpgd	0.185143	0.627826	Yes	Yes	Yes		Ubtfl1	0.0296975	0.405532	Yes	Yes	Yes
Hspg2	22.8911	43.8633	NO	NO	NO		Cpne5	2.66753	4.68776	NO	NO	NO
Inhbb	4.70115	8.8176	NO	NO	NO		Bbs9	1.87242	3.84142	NO	Yes	NO
Ipp	1.1609	2.10698	NO	NO	NO		Bbs9	1.93961	3.95057	NO	Yes	NO
Kcnb1	0.162088	0.583555	NO	NO	NO		Ndrg2	6.24668	10.4821	NO	NO	NO
Kcnj4	1.00798	3.19139	NO	NO	NO		Ndrg2	6.55808	11.0047	NO	NO	NO
Kcnu1	0.0317949	0.171339	NO	NO	NO		Ndrg2	6.40482	10.7591	NO	NO	NO
Kcnq1	0.023498	0.221109	NO	NO	NO		Ndrg2	6.15606	10.3301	NO	NO	NO
Napsa	1.11047	9.42306	NO	NO	NO		Ndrg2	5.75733	9.661	NO	NO	NO
Kif4	4.7916	10.018	NO	NO	NO		Ndrg2	6.55155	10.9937	NO	NO	NO
Klf3	24.4899	76.8831	NO	NO	NO		Ndrg2	6.36565	10.6903	NO	NO	NO
Krt4	0.00491693	0.14541	NO	NO	NO		Ndrg2	6.6896	11.2343	NO	NO	NO
Lag3	0.496721	1.19162	NO	NO	NO		Ndrg2	6.6828	11.2229	NO	NO	NO
Lama1	2.23128	16.8044	NO	NO	NO		Ndrg2	6.2715	10.5321	NO	NO	NO
Lamc2	1.61186	5.48122	NO	NO	NO		Ndrg2	5.85787	9.83751	NO	NO	NO
Lrp5	10.6754	17.9085	NO	NO	NO		Ndrg2	6.72713	11.3498	NO	NO	NO
Lrrn1	0.157333	0.496444	Yes	Yes	Yes		Fbxl3	8.36151	14.7931	NO	NO	NO
Ltk	0.113999	1.03497	NO	NO	NO		Fbxl3	8.36326	14.7782	NO	NO	NO
Epcam	22.1512	35.9575	NO	NO	NO		Srsf7	39.1565	66.3264	NO	NO	NO
Mesp2	0.401358	2.39903	NO	NO	NO		Dclre1a	2.69548	4.30575	NO	NO	NO
Cxcl9	0.0490086	0.199421	NO	NO	NO		Morn2	3.11704	5.21867	NO	NO	NO
Mmp15	1.42429	2.62568	NO	NO	NO		Ocln	0.507368	1.04014	NO	NO	NO
Mras	4.35238	19.3115	NO	NO	NO		Ocln	0.503577	1.04731	NO	NO	NO
Msi1	3.07866	13.1942	NO	NO	NO		Ocln	0.509097	1.05879	NO	NO	NO
Mthfd2	12.9187	44.3556	NO	NO	NO		Ocln	0.539099	1.00857	NO	NO	NO
Mybl2	42.7744	125.832	NO	NO	NO		Rps24	7.15238	11.6011	NO	NO	NO
Mybpc3	0.152865	0.360278	NO	NO	NO		Rps24	7.21307	11.6974	NO	NO	NO
Nid2	39.0157	62.6474	NO	NO	NO		Tmtc4	1.98415	3.99886	Yes	Yes	Yes
Nkx2-5	0.162114	0.648647	NO	NO	NO		Tmtc4	2.04131	4.11206	Yes	Yes	Yes
Nlk	3.01879	5.63181	NO	NO	NO		Ipo5	75.6836	152.843	NO	NO	NO
Nos1	0.853682	2.47476	NO	NO	NO		Rcbtb1	7.62983	13.5074	NO	NO	NO
Nos3	0.37016	3.52614	NO	NO	NO		Cep55	11.0245	23.5377	NO	NO	NO
Npas2	0.153868	0.318272	NO	NO	NO		Elobl	0.146209	0.832037	NO	NO	NO
Npr1	2.14861	3.59803	NO	NO	NO		Msc	0.862426	3.59845	NO	Yes	NO
Ntrk3	0.0272441	0.167497	Yes	Yes	Yes		Psma8	1.91275	3.86158	NO	NO	NO
P2rx1	0.00836282	0.254206	NO	NO	NO		Rnf2	13.5351	22.9648	NO	NO	NO
Pde8a	3.48625	5.91002	NO	NO	NO		Rnf2	14.1971	24.0586	NO	NO	NO
Padi2	0.681316	7.32609	NO	NO	NO		Rnf2	14.2099	24.107	NO	NO	NO
Pdx1	0.0201355	0.169689	NO	NO	NO		Zfp184	2.14149	3.81851	NO	NO	NO
Pfkfb1	3.07982	4.99031	NO	NO	NO		Zfp553	12.2919	21.1124	NO	NO	NO
Pla2g2c	0.0943719	0.491973	NO	NO	NO		Gpa33	16.0177	26.9394	NO	NO	NO
Phox2a	0.702459	2.03744	NO	NO	NO		Gpa33	6.68451	11.1819	NO	NO	NO
Pola1	4.39844	9.12723	NO	NO	NO		Arhgap26	0.358433	0.652075	NO	Yes	NO
Ppl	0.512942	1.47325	NO	NO	NO		Celf6	0.0314693	0.152384	NO	NO	NO
Ptpn20	0.00980475	0.126592	NO	NO	NO		Brd8	14.5934	24.2193	NO	NO	NO
Rfx2	8.20533	32.3076	NO	NO	NO		Pfn4	0.225822	0.58328	NO	NO	NO
Rpl12	2.8121	6.27306	NO	NO	NO		Itgae	0.196403	0.400619	NO	NO	NO
Rpl28	2.85459	4.97067	NO	NO	NO		S100pbp	6.66618	10.9465	NO	NO	NO
Ryr1	0.407989	1.42679	NO	NO	NO		1700037H04Rik	35.3511	56.7017	NO	NO	NO
Stmn3	1.6823	4.66841	NO	NO	NO		Zfp707	1.42023	2.95773	NO	NO	NO
Selenbp1	0.317172	0.711309	NO	NO	NO		Zfp707	1.42194	2.923	NO	NO	NO
Slc1a1	0.108362	2.7543	NO	NO	NO		Nipal3	1.46408	2.72118	NO	NO	NO
Slc1a5	10.1284	40.8754	NO	NO	NO		Acan	0.15983	0.750017	NO	NO	NO
Sox1	0.130108	1.00565	NO	NO	NO		Tdrp	3.78411	6.01988	NO	NO	NO
Sox15	9.19845	14.9436	NO	NO	NO		Tdrp	3.68317	5.86146	NO	NO	NO
Stra8	0.84358	9.79004	NO	NO	NO		Tdrp	3.80455	6.06945	NO	NO	NO
Syngr1	13.4985	33.0833	NO	NO	NO		Tdrp	3.7198	5.91975	NO	NO	NO
Tacr2	0.0136518	0.290669	NO	NO	NO		Slain1	3.21961	5.20802	NO	Yes	NO
Hnf1a	0.778706	4.63231	NO	NO	NO		Galnt16	0.21326	0.449472	NO	NO	NO
Tex9	1.8892	4.08687	NO	NO	NO		Galnt16	0.214167	0.451382	NO	NO	NO
Tgm2	9.90736	20.1999	NO	NO	NO		Tmem63c	0.131033	0.815782	NO	NO	NO
Thrsp	0.130955	0.529693	NO	NO	NO		Tmem63c	0.131108	0.816252	NO	NO	NO
Tlx2	0.0276077	1.08871	NO	NO	NO		Plcd3	2.24155	3.83622	NO	NO	NO
Tnni3	1.2986	3.10179	NO	NO	NO		Tmem161b	3.19668	5.43954	Yes	Yes	Yes
Tuba3a	0.882022	4.47822	NO	NO	NO		Tmem161b	3.14822	5.42287	Yes	Yes	Yes
Tuba3b	0.0126447	0.584661	NO	NO	NO		Tmem161b	3.05197	5.24614	Yes	Yes	Yes
Ucp1	0.0556535	0.248364	NO	NO	NO		Pold2	40.0407	80.3247	NO	NO	NO
Vdr	0.343508	0.703767	NO	NO	NO		Gstp3	1.51121	6.84574	NO	NO	NO
Slc32a1	0.0724619	0.49096	NO	NO	NO		Gpr19	4.10681	6.75785	NO	NO	NO
Vil1	0.0783254	0.546217	NO	NO	NO		Gpr19	5.03864	8.3367	NO	NO	NO
Wnt10a	0.0204717	0.15605	NO	NO	NO		Gpr19	4.34864	7.11928	NO	NO	NO
Wnt3a	0.20724	0.510167	NO	NO	NO		Gpr19	4.1233	6.75116	NO	NO	NO
Wnt6	0.166503	1.22121	NO	NO	NO		Gpr19	4.89362	8.05557	NO	NO	NO
Zfp101	0.571365	1.6027	NO	NO	NO		Fam234b	1.04088	3.36641	NO	NO	NO
Trim25	23.1904	41.7185	NO	NO	NO		Fam234b	1.03865	3.35919	NO	NO	NO
Zfp42	31.6941	107.352	NO	NO	NO		Zfp977	0.76675	1.68853	NO	NO	NO
Zfp61	1.32278	2.48706	NO	NO	NO		C2cd5	5.70226	12.7318	NO	NO	NO
Zic3	17.0335	30.2941	NO	NO	NO		C2cd5	5.71715	12.8173	NO	NO	NO
Zik1	1.15231	2.25575	NO	NO	NO		C2cd5	6.11244	13.5951	NO	NO	NO
Chrnb2	0.198686	0.500947	NO	NO	NO		C2cd5	5.67808	12.7301	NO	NO	NO
Adcy1	0.452999	2.01631	NO	NO	NO		C2cd5	5.76037	12.9142	NO	NO	NO
Parp2	15.8733	27.9482	NO	NO	NO		C2cd5	5.87438	13.1752	NO	NO	NO
Adra2b	0.0173717	0.145154	NO	NO	NO		Abtb1	4.84357	8.34515	NO	NO	NO
Alox12b	0.0595067	0.321853	NO	NO	NO		Gm5165	0.950232	2.138	NO	NO	NO
Apoa1	0.010625	0.230043	NO	NO	NO		Atad2b	2.53304	4.15	NO	NO	NO
Apob	0.0370264	0.0926675	NO	Yes	NO		Sncb	0.423255	0.905616	NO	NO	NO
Apobec2	1.5566	4.2466	NO	NO	NO		Plaat3	1.17847	2.48868	NO	NO	NO
Aqp5	0.531492	1.16639	NO	NO	NO		Gm550	0.555811	1.42232	NO	NO	NO
Atp1b1	13.1237	62.3668	NO	NO	NO		Ubtf	22.2653	35.4041	NO	NO	NO
Akr1b7	0.040822	0.270057	NO	NO	NO		Ubtf	22.4636	35.7075	NO	NO	NO
Cep131	3.08893	5.03209	NO	NO	NO		Ubtf	21.3695	33.9934	NO	NO	NO
Glb1	19.9073	36.2992	NO	NO	NO		Ubtf	22.4755	35.7283	NO	NO	NO
Chic1	0.813811	1.32019	NO	NO	NO		Fgf11	0.52943	0.971048	NO	NO	NO
Klf5	47.8814	253.491	NO	NO	NO		Fgf11	0.529082	0.964913	NO	NO	NO
Aspm	3.77609	7.79876	NO	NO	NO		Cwc22	2.97363	5.49704	Yes	Yes	Yes
Casp14	0.0392115	0.264132	NO	NO	NO		Cwc22	2.97628	5.50193	Yes	Yes	Yes
Ccnk	33.6002	59.8187	NO	NO	NO		Cwc22	2.9398	5.39846	Yes	Yes	Yes
Entpd2	0.552514	2.9734	NO	NO	NO		Cwc22	2.25526	4.30792	Yes	Yes	Yes
Cdc25c	3.85677	9.33756	NO	NO	NO		Knl1	1.90272	3.3255	NO	NO	NO
Cdh4	0.213682	0.781312	NO	NO	NO		Slc34a3	0.192288	0.529607	NO	NO	NO
Cdk5r2	0.134838	0.656497	NO	NO	NO		Duox2	0.0119866	0.0981015	NO	NO	NO
Cdkn1b	4.32578	10.1972	NO	NO	NO		Acot8	5.91658	9.68206	NO	NO	NO
Cdx1	3.40273	29.0465	NO	NO	NO		Acot8	6.49032	10.7065	NO	NO	NO
Cebpg	2.65666	4.60354	NO	NO	NO		Rbm39	48.2729	81.9743	NO	NO	NO
Celsr1	0.743313	5.06378	NO	NO	NO		Rbm39	48.6122	82.5324	NO	NO	NO
Clcn2	3.76312	8.29361	NO	NO	NO		Rbm39	46.9929	79.4833	NO	NO	NO
Ccr4	0.0398041	0.274353	NO	NO	NO		Rbm39	45.8794	77.59	NO	NO	NO
Col15a1	0.0461548	0.312432	NO	NO	NO		Rbm39	47.8205	80.8675	NO	NO	NO
Col9a3	1.80487	2.94113	NO	NO	NO		Rbm39	47.9378	81.112	NO	NO	NO
Cox7a1	6.54044	10.9668	NO	NO	NO		Rbm39	48.1126	81.3627	NO	NO	NO
Cpt1b	0.574472	4.15726	NO	NO	NO		Pttg1	33.139	56.9213	NO	NO	NO
Ptgdr2	0.908404	1.6141	NO	NO	NO		Dgke	2.09387	5.03999	NO	NO	NO
Cyct	0.658977	2.87722	NO	NO	NO		Arl14ep	3.69736	7.46708	NO	NO	NO
Cyp46a1	0.238817	1.81226	NO	NO	NO		Arl14ep	3.89255	7.85837	NO	NO	NO
Des	4.94465	8.13947	NO	NO	NO		Ranbp17	4.43024	8.20479	NO	NO	NO
Dlx3	0.218681	1.27254	NO	NO	NO		Uqcr10	60.8878	97.7356	NO	NO	NO
S1pr4	0.0924597	0.520452	NO	NO	NO		Rnf212	0	0.16907	NO	NO	NO
Edn1	0.635696	1.95576	NO	NO	NO		Itgb3bp	3.23815	5.84206	NO	Yes	NO
Efna3	4.32088	11.1679	NO	NO	NO		Itgb3bp	3.49315	6.10419	NO	Yes	NO
En2	0.605362	1.03509	NO	NO	NO		Tox2	0.062387	0.3164	NO	NO	NO
Epas1	3.32856	6.11435	NO	NO	NO		Tox2	0.0732325	0.342082	NO	NO	NO
Epha2	29.7525	67.5999	NO	NO	NO		Rtel1	10.5644	19.1242	NO	NO	NO
Ephb3	3.52375	8.25701	NO	NO	NO		Pla2g4f	0.176552	0.464362	NO	NO	NO
Khdrbs3	5.64839	9.84247	Yes	Yes	Yes		Pla2g4f	0.176552	0.464362	NO	NO	NO
F2	0.0898047	0.467555	NO	NO	NO		Pla2g4f	0.176724	0.464813	NO	NO	NO
Faah	0.404223	1.88255	NO	NO	NO		Pla2g4e	0.175184	0.362318	NO	NO	NO
Fabp3	9.04848	22.7911	NO	NO	NO		Pla2g4e	0.179349	0.370931	NO	NO	NO
Fah	7.0299	14.3729	Yes	NO	NO		Accsl	1.56739	3.5153	NO	NO	NO
Fgf4	7.84128	42.4057	NO	NO	NO		Accsl	1.36989	3.55626	NO	NO	NO
Fzd9	1.40138	2.56962	NO	NO	NO		Rnf167	21.5819	36.1469	NO	NO	NO
Gpd1	0.277868	0.624521	NO	NO	NO		2810408A11Rik	1.49063	3.31092	NO	NO	NO
Gjb5	5.30141	9.58702	NO	NO	NO		Odad4	0.161687	0.399961	NO	NO	NO
Gli1	8.16415	17.6823	NO	NO	NO		Ppp1r9a	0.952126	2.28636	NO	NO	NO
Gp1ba	0.273249	0.525902	NO	NO	NO		Igsf23	0.989896	1.74839	NO	NO	NO
Grin2c	0.0269869	0.610512	NO	NO	NO		Igsf23	0.847939	1.49554	NO	NO	NO
Haspin	4.3216	10.4631	NO	NO	NO		Zfp286	0.64537	1.33652	NO	NO	NO
H2-Q10	0.344255	1.49906	NO	NO	NO		Zfp286	0.649609	1.3453	NO	NO	NO
Hal	0.169092	2.50663	NO	NO	NO		Zfp286	0.639798	1.26668	NO	NO	NO
Foxd3	4.41418	20.3369	NO	NO	NO		Cisd3	6.2175	13.4813	NO	NO	NO
H2ax	100.252	299.988	NO	NO	NO		Odad1	2.9964	4.88398	NO	NO	NO
Hoxc13	0.44263	1.7965	NO	NO	NO		Piwil2	0.750911	2.57072	NO	NO	NO
Hrc	0.159693	0.519946	NO	NO	NO		Ssbp1	5.05306	8.52065	NO	NO	NO
Hsd17b1	0.236576	1.379	NO	NO	NO		Rab44	0.05287	0.198083	NO	NO	NO
Elavl3	1.41513	2.84805	NO	NO	NO		Igfals	0.165239	0.660257	NO	NO	NO
Itga2b	0.526777	0.931603	NO	NO	NO		Igfals	0.162951	0.622237	NO	NO	NO
Jag2	3.24288	6.98742	NO	NO	NO		Lims2	1.02193	1.74872	NO	NO	NO
Kcna7	0.168981	0.38243	NO	NO	NO		Zfp982	1.35576	2.77329	NO	NO	NO
Kcnab3	0.809918	1.59847	NO	NO	NO		Boll	0.0921789	0.275318	Yes	Yes	Yes
Kcnh3	0.618852	1.85926	NO	NO	NO		Fbxo15	26.5012	51.3569	NO	NO	NO
Kcnk3	0.0318467	0.131967	NO	NO	NO		1700019D03Rik	1.96226	5.17527	NO	NO	NO
Kif11	10.8396	22.2413	NO	NO	NO		1700019D03Rik	1.93331	5.09438	NO	NO	NO
Kif15	5.21408	12.9412	NO	NO	NO		1700019D03Rik	1.97916	5.21985	NO	NO	NO
Klf12	1.12864	3.23034	Yes	NO	NO		1700019D03Rik	1.92231	5.06992	NO	NO	NO
Klf4	89.4159	258.366	NO	NO	NO		1700019D03Rik	1.98087	5.22435	NO	NO	NO
Lamc1	31.2705	67.9621	NO	NO	NO		1700019D03Rik	1.93581	5.10551	NO	NO	NO
Lat	1.03223	4.23522	NO	NO	NO		1700019D03Rik	2.01209	5.30669	NO	NO	NO
Lbx1	0.0359183	0.287093	NO	NO	NO		Setd6	8.41211	15.5591	NO	NO	NO
Lgals4	0.671693	2.91989	NO	NO	NO		Nudt12	0.326181	1.00799	Yes	Yes	Yes
Lgals6	0.7983	3.45978	NO	NO	NO		Zfp958	0.773047	1.32908	NO	NO	NO
Lhx3	0.0048847	0.120681	NO	NO	NO		Zfp958	0.778685	1.33608	NO	NO	NO
Phyh	13.0422	24.9352	NO	NO	NO		Dap3	8.34103	14.2161	NO	NO	NO
Matn1	0.163311	0.664346	NO	NO	NO		Mdga1	0.297294	0.600113	NO	NO	NO
Matn3	0.28901	1.36925	NO	NO	NO		Polr1has	2.87563	5.71732	NO	NO	NO
Mgat3	1.8432	4.63504	NO	NO	NO		Polr1has	2.34347	4.73476	NO	NO	NO
Bhlha15	0.143383	0.700223	NO	NO	NO		Polr1has	2.5311	5.05929	NO	NO	NO
Mog	0.102503	0.623639	NO	NO	NO		Cystm1	8.22719	18.9814	NO	NO	NO
Sik1	20.6054	40.0606	NO	NO	NO		Ecscr	2.76681	5.60141	NO	NO	NO
Ncoa1	2.72535	6.38402	NO	NO	NO		Ecscr	2.84313	5.70915	NO	NO	NO
Neb	0.0458374	0.135188	NO	NO	NO		Osr2	3.61932	7.39445	NO	NO	NO
Nfatc2ip	7.51899	29.4039	NO	NO	NO		Rbm26	9.35306	19.0183	NO	NO	NO
Nfe2l3	0.281879	0.838403	NO	NO	NO		Rbm26	9.3841	19.0815	NO	NO	NO
Nfyb	9.13954	18.8069	NO	NO	NO		Rbm26	7.76478	16.735	NO	NO	NO
Notch4	1.24162	2.87321	NO	NO	NO		1700019N19Rik	0	0.0937708	NO	NO	NO
Otx1	0.0432148	0.493359	NO	NO	NO		1700019N19Rik	0	0.112812	NO	NO	NO
Oxt	0	0.251926	NO	NO	NO		Ccnt1	2.79506	4.57569	NO	NO	NO
Pax8	0.500016	1.22367	NO	NO	NO		Cyp4f40	0.0268012	0.171932	NO	NO	NO
Padi3	0.655386	2.62934	NO	NO	NO		Pax2	0.0246622	0.120088	NO	NO	NO
Padi4	0.266733	2.01408	NO	NO	NO		Pax2	0.0239342	0.116543	NO	NO	NO
Phkg1	0.396115	0.832518	NO	NO	NO		Pax2	0.0239529	0.116635	NO	NO	NO
Piga	3.48767	8.73012	NO	NO	NO		Pax2	0.0255753	0.112432	NO	NO	NO
Pole2	8.23186	15.7813	NO	NO	NO		Pax2	0.0261284	0.114863	NO	NO	NO
Pou2f3	0.816553	6.87762	NO	NO	NO		Pax2	0.0261486	0.114952	NO	NO	NO
Pou4f1	0.394983	3.4747	NO	NO	NO		Pax2	0.0260212	0.114392	NO	NO	NO
Ppef2	0.221093	0.518444	NO	NO	NO		Pax2	0.0267412	0.114573	NO	NO	NO
Prkdc	1.78368	3.31949	NO	NO	NO		Pax2	0.0265871	0.113913	NO	NO	NO
St14	6.62495	22.6526	NO	NO	NO		Arhgef38	0.0803984	0.355654	Yes	Yes	Yes
Prtn3	0.104789	0.679268	NO	NO	NO		Boll	0.171446	0.466323	Yes	Yes	Yes
Ptprn2	0.0915288	0.303242	Yes	Yes	Yes		Boll	0.172689	0.490491	Yes	Yes	Yes
Pygm	0.611284	4.18962	NO	NO	NO		Piwil4	0.197544	0.838887	NO	NO	NO
Rev3l	2.35574	3.97867	NO	NO	NO		Piwil4	0.197728	0.839665	NO	NO	NO
Rps18	19.7373	33.879	NO	NO	NO		Piwil4	0.202305	0.935057	NO	NO	NO
Rps6ka2	2.52133	7.66664	NO	NO	NO		D430041D05Rik	0.0225184	0.078853	NO	NO	NO
Scnn1a	0.270483	0.857309	NO	NO	NO		Prdm11	0.174233	0.290736	NO	NO	NO
Srsf2	115.219	209.873	NO	NO	NO		Prdm11	0.17479	0.297723	NO	NO	NO
St6galnac3	0.33555	2.5156	NO	NO	NO		Grtp1	6.77687	20.9545	NO	NO	NO
St8sia1	0.35926	0.689529	NO	NO	NO		Slc2a7	0.116886	0.683743	NO	NO	NO
Slc2a3	123.741	375.948	NO	NO	NO		Cracr2a	0.120304	0.280984	NO	NO	NO
Slc4a1	0.0248426	0.272106	NO	NO	NO		Ptprd	0.154798	0.294268	Yes	Yes	Yes
Slc7a5	32.1245	84.4637	NO	NO	NO		Ptprd	0.165554	0.312002	Yes	Yes	Yes
Snrpc	11.1734	18.7748	NO	NO	NO		Ptprd	0.164804	0.310588	Yes	Yes	Yes
Sox10	0.0972606	0.583425	NO	NO	NO		Dab1	0.796968	2.54241	Yes	Yes	Yes
Sox2	84.6852	154.867	NO	NO	NO		Dab1	0.781637	2.4935	Yes	Yes	Yes
Sox7	0.196259	0.941405	NO	NO	NO		Dab1	1.12734	3.22409	Yes	Yes	Yes
Star	0.955997	2.54198	NO	NO	NO		Dab1	0.777177	2.46012	Yes	Yes	Yes
Stc2	1.61483	5.06579	NO	NO	NO		Etl4	7.91281	13.7645	Yes	Yes	Yes
Eif1	40.622	80.2846	NO	NO	NO		Fsd1l	0.924663	1.59846	NO	NO	NO
Sycp1	0.25944	0.863392	NO	NO	NO		Wdr76	3.69113	5.92618	NO	NO	NO
Sycp3	5.87791	26.7493	NO	NO	NO		Chd5	0.536261	1.05325	NO	NO	NO
Tbx3	17.3163	77.0738	NO	NO	NO		Trim63	0.625629	1.75604	NO	NO	NO
Tbx6	0.282686	0.907411	NO	NO	NO		Rexo5	0.891303	1.61995	NO	Yes	NO
Tdgf1	59.0559	152.608	NO	NO	NO		Meiosin	0.240942	0.688048	NO	NO	NO
Tie1	0.095387	0.306168	NO	NO	NO		Meiosin	0.248494	0.705287	NO	NO	NO
Top2a	45.5341	73.9166	NO	NO	NO		Tle7	0.0574488	0.284276	NO	NO	NO
Ppp1r13b	2.9195	5.79532	NO	NO	NO		Shoc1	0.0205595	0.231047	NO	NO	NO
Traip	5.22299	8.83678	NO	NO	NO		Gm38999	0.205593	1.25053	NO	NO	NO
Trap1a	25.3748	43.1913	NO	NO	NO		Gm36210	0.244313	0.508161	NO	NO	NO
Xntrpc	1.74375	3.75376	NO	NO	NO		Lsmem2	0.59182	1.71475	NO	NO	NO
Tnfrsf4	0.43516	1.6972	NO	NO	NO		Dnah12	0.0100057	0.0489518	NO	NO	NO
Zrsr1	2.23354	7.02381	NO	NO	NO		Rnf212b	0.152801	0.997484	NO	NO	NO
Lin7b	0.834582	1.96671	NO	NO	NO		Gm36718	0.115185	1.09512	NO	NO	NO
Vipr1	0.0834139	0.414568	NO	NO	NO		Ankrd31	0.130453	0.343259	NO	NO	NO
Vwf	0.254935	0.831752	NO	NO	NO		Vinac1	0.0236104	0.0700512	NO	NO	NO
Zan	0.0117462	0.129477	NO	NO	NO		Ppp1ccb	2.67964	4.85301	NO	NO	NO
Mkrn3	0.389685	0.741154	NO	NO	NO		Arhgap32	3.76797	6.51316	NO	NO	NO
Zfp59	0.874842	1.78205	NO	NO	NO		Arhgap32	3.70659	6.40976	NO	NO	NO
Ikzf3	0.0170281	0.253118	NO	NO	NO		Slc12a8	0.58921	1.4251	NO	NO	NO
Adam23	9.83841	19.3705	NO	NO	NO		Emid1	0.424321	1.01996	NO	NO	NO
Aloxe3	0.351917	0.694744	NO	NO	NO		Emid1	0.425726	1.02334	NO	NO	NO
Lamc3	0.033703	0.0929537	NO	NO	NO		Emid1	0.409782	0.985034	NO	NO	NO
Mmp17	1.33625	6.04254	NO	NO	NO		Emid1	0.428875	1.00917	NO	NO	NO
Nt5e	2.00371	4.31399	NO	NO	NO		Emid1	0.4143	1.00195	NO	NO	NO
Tenm1	0.0658188	0.168673	Yes	Yes	Yes		Emid1	0.448555	1.01681	NO	NO	NO
Spry4	7.08377	12.6864	NO	NO	NO		Ly6g6d	0.407254	2.20744	NO	NO	NO
Vax2	0.22516	0.926979	NO	NO	NO		Ly6g6d	0.316886	1.71761	NO	NO	NO
Clcn6	5.6228	9.34755	NO	NO	NO		Gm21818	0.0341343	1.00084	NO	NO	NO
Gnpda1	10.2355	21.9421	NO	NO	NO		Zfp982	1.26331	2.58049	NO	NO	NO
Map3k1	2.17878	4.54685	NO	NO	NO		Zfp982	1.28538	2.62699	NO	NO	NO
Mok	4.98089	9.22663	NO	NO	NO		Pzp	0.0415901	0.244714	NO	NO	NO
Sema4g	2.08665	10.3655	NO	NO	NO		Abca4	0.0321585	0.106369	NO	NO	NO
Dpysl4	0.313712	1.09753	NO	NO	NO		Chrna7	0.719416	1.75649	Yes	Yes	Yes
Figla	0.0261614	0.525463	NO	NO	NO		Acvr1b	4.02173	6.63761	NO	NO	NO
Pla2g2e	0.358692	1.63564	NO	NO	NO		Ada	3.86853	7.06835	NO	NO	NO
Asns	40.466	208.154	NO	NO	NO		Gpr182	0.0827174	0.86052	NO	NO	NO
Atp1b2	2.74018	16.6971	NO	NO	NO		Parp1	76.4006	131.831	NO	NO	NO
Btn1a1	0.0893842	0.395693	NO	NO	NO		Adrb1	0.113273	0.490192	NO	NO	NO
Clu	5.96566	11.0982	NO	NO	NO		Acan	0.159461	0.753398	NO	NO	NO
Cpt1a	20.4417	37.1224	NO	NO	NO		Nr0b1	37.4622	75.3249	Yes	Yes	Yes
Epb41l4a	6.39975	24.1543	NO	NO	NO		Alppl2	0.00469883	0.285117	NO	NO	NO
Cdca3	42.1609	71.8789	NO	NO	NO		Aldh3a1	0.3776	0.857125	NO	NO	NO
H2-Ke6	4.45631	11.465	NO	NO	NO		Alox12	0.324529	0.793037	NO	NO	NO
Hebp1	5.41821	20.5583	NO	NO	NO		Aplp1	27.4181	48.5115	NO	NO	NO
H3c1	0.082493	0.70252	NO	NO	NO		Apoc1	6.48565	15.548	NO	NO	NO
Hmmr	9.8099	27.8093	NO	NO	NO		Aqp8	0.0902266	1.17868	NO	NO	NO
Hspb1	18.3067	38.7033	NO	NO	NO		Art5	0.240145	0.700955	NO	NO	NO
Itgb7	4.21802	7.76304	NO	NO	NO		Asgr2	0.0592325	1.97265	NO	NO	NO
Muc1	1.90798	4.62428	NO	NO	NO		Atf1	10.0941	16.2142	NO	NO	NO
Mx2	3.04084	5.00183	NO	NO	NO		Slc7a1	8.17159	26.8576	NO	NO	NO
Nodal	9.18823	23.8651	NO	NO	NO		Slc7a3	21.1672	40.224	NO	NO	NO
Ppp1cc	0.75452	1.23615	NO	NO	NO		Bard1	2.86241	5.51849	NO	NO	NO
Sema5b	0.437976	6.35281	NO	NO	NO		Hrk	0.0641365	0.666683	NO	NO	NO
Sptb	0.454127	0.756685	NO	NO	NO		Bmp6	0.485553	1.10835	NO	NO	NO
Plek2	0.912728	3.9962	NO	NO	NO		Calca	0.279631	1.62073	Yes	Yes	Yes
Nufip1	11.3887	31.4677	NO	NO	NO		Camk2b	3.73913	6.671	NO	NO	NO
Pald1	9.46624	20.8015	NO	NO	NO		Capn3	0.770474	1.22612	NO	NO	NO
Mmel1	0.171117	0.580853	NO	NO	NO		Ccnb2	27.2079	50.6305	NO	NO	NO
Abcc2	0.0377955	0.120884	NO	NO	NO		Ccnd3	63.6062	120.516	NO	NO	NO
Dnah8	1.65218	5.41342	NO	NO	NO		Ccnf	38.0337	62.3505	NO	NO	NO
Ly75	2.60287	11.3515	NO	NO	NO		Cd1d2	0	0.0946828	NO	NO	NO
Sfrp1	5.26237	22.8862	NO	NO	NO		Cd3e	0.18353	0.802575	NO	NO	NO
Hdgfl3	1.60347	2.61483	NO	NO	NO		Cdk1	11.8404	21.9696	NO	NO	NO
Meltf	0.0463829	0.752575	NO	NO	NO		Cenpa	21.1697	35.3739	NO	NO	NO
Hey2	0.0960067	0.324344	NO	NO	NO		Chek1	6.80656	13.569	Yes	NO	NO
Fbxl6	8.96865	15.542	NO	NO	NO		Chga	3.16666	6.46521	NO	NO	NO
Zfp354c	0.93648	1.57527	NO	NO	NO		Ovgp1	0.259464	0.526399	NO	NO	NO
Chrna4	0.110499	0.659027	NO	NO	NO		Cidea	0.149357	0.62473	NO	NO	NO
Galnt3	0.462051	1.12507	Yes	Yes	Yes		Cit	3.0093	5.61344	NO	NO	NO
Gbx1	0.0848903	0.380572	NO	NO	NO		Cited1	0.848261	2.06433	NO	NO	NO
Slit1	0.107194	0.277852	NO	NO	NO		Col13a1	0.263838	1.66861	NO	NO	NO
Dkkl1	0.610978	2.69204	NO	NO	NO		Col17a1	0.131894	0.272081	NO	NO	NO
Icosl	1.87823	3.22938	NO	NO	NO		Cplx1	0.363746	1.05677	NO	NO	NO
Dmrt1	9.2184	17.8947	NO	NO	NO		Cry1	7.11305	13.1726	NO	NO	NO
Crym	0.762084	4.48646	Yes	NO	NO		Cux2	0.374078	0.777927	NO	NO	NO
Il27ra	0.177773	1.88833	NO	NO	NO		Cyb561	1.86369	3.05281	NO	NO	NO
Clasrp	9.58617	15.5588	NO	NO	NO		Cycs	0.244925	0.646249	NO	NO	NO
Zscan12	0.983654	1.69403	NO	NO	NO		Dcc	0.0195505	0.149954	Yes	Yes	Yes
Comp	0.179902	0.512305	NO	NO	NO		Dhh	0.0669771	0.191187	NO	NO	NO
Aqp3	5.50103	25.4063	NO	NO	NO		Dffb	1.83445	3.0693	NO	NO	NO
Prkn	0.355204	0.656865	NO	NO	NO		Dmd	1.01197	1.84824	Yes	Yes	Yes
Auh	3.19408	5.33873	NO	NO	NO		Dsg2	2.51691	9.58959	NO	NO	NO
Neu3	0.449026	0.845146	NO	NO	NO		Usp17la	0.179209	2.10544	Yes	Yes	Yes
Uchl3	11.5756	41.9647	NO	NO	NO		Ect2	15.8728	29.472	NO	NO	NO
Chst3	0.0512888	0.449672	NO	NO	NO		Cela2a	0.39765	1.10151	NO	NO	NO
Rbm3	0.751016	1.41754	NO	NO	NO		Elf3	5.02891	8.87264	NO	NO	NO
Irf6	0.924969	3.02175	NO	NO	NO		Eng	6.52692	10.5143	NO	NO	NO
Ppp1r3c	0.0690051	0.233383	NO	NO	NO		Epha4	3.78944	7.62377	NO	NO	NO
Fkbp1b	3.81843	7.33905	NO	NO	NO		Mpzl2	3.33524	8.04987	NO	NO	NO
Acsm3	0.316602	0.710204	NO	Yes	NO		Ezh2	26.1942	47.6307	NO	NO	NO
Spint1	7.49091	21.6298	NO	NO	NO		F2rl1	15.0013	28.1127	NO	NO	NO
Fanca	3.93946	8.4065	NO	NO	NO		Fbp2	0.209728	2.27789	NO	NO	NO
Hmgn2	1.56195	2.6227	NO	NO	NO		Fdx1	2.28565	4.35012	NO	NO	NO
Stag3	3.88891	28.4486	NO	NO	NO		Fdxr	3.61247	6.65969	NO	NO	NO
Phgdh	1.80626	3.80143	NO	NO	NO		Fgf3	0.152192	0.812926	NO	NO	NO
Olig1	0.0462828	0.448495	NO	NO	NO		Fgfr3	0.189057	1.49126	NO	NO	NO
Rpl5	2.97571	6.27017	NO	NO	NO		Fgfr4	0.345814	1.57539	NO	NO	NO
Spag5	9.28932	17.7317	NO	NO	NO		Folr1	10.0094	17.3609	NO	NO	NO
Septin1	23.9724	68.1719	NO	NO	NO		Fzd4	0.582411	0.928021	NO	Yes	NO
Zfp316	0.429029	0.762165	NO	NO	NO		G0s2	0.0718937	1.03377	NO	NO	NO
Akap8l	9.34556	22.239	NO	NO	NO		Gabpa	12.0426	19.7837	NO	NO	NO
Rpl36	2.36751	5.10245	NO	NO	NO		B4galnt2	0.193644	0.765055	NO	NO	NO
Golga4	5.88604	9.45643	NO	NO	NO		Gata4	0.535878	4.77214	NO	NO	NO
Wbp4	6.15766	14.5266	NO	NO	NO		Gc	0.00580619	0.201406	Yes	Yes	Yes
Sfrp5	0.161563	0.944488	NO	NO	NO		Gcnt2	4.54943	7.54472	NO	NO	NO
Syt7	1.16009	2.88307	NO	NO	NO		Ggt1	1.36551	5.44792	NO	NO	NO
Hs3st3b1	0.375703	0.662331	NO	NO	NO		Gja4	0.211341	0.559721	NO	NO	NO
Nup210	5.66673	11.1131	NO	NO	NO		Gjc1	13.7323	22.5573	NO	NO	NO
Apom	0.159574	0.653177	NO	NO	NO		Gpr19	5.22406	8.59163	NO	NO	NO
Slc1a4	3.26411	7.57332	NO	NO	NO		Gpr27	0.233294	0.610975	NO	NO	NO
Pgam2	1.56719	2.69922	NO	NO	NO		Rhpn1	0.719443	1.58897	NO	NO	NO
Tmem131	27.1234	59.235	NO	NO	NO		Guca1a	1.16242	2.60855	NO	NO	NO
Srcin1	0.439753	1.97258	NO	NO	NO		H2-Bl	0.635784	1.25692	NO	NO	NO
Nprl2	6.46751	10.656	NO	NO	NO		H2-Oa	0.175306	0.743074	NO	NO	NO
Mia	0.375303	1.98617	NO	NO	NO		Hcn2	2.43428	3.90581	NO	NO	NO
Egfl6	0.109462	0.375783	NO	NO	NO		Hdac2	36.8695	64.7296	NO	NO	NO
Prx	2.25093	5.10957	NO	NO	NO		Hdc	0.357424	1.04084	NO	NO	NO
[truncated: 2,046 more rows]

## Sheet: Extended Data Fig.6e
Extended Data Fig.6e: Gene ontology analysis of genes upregulated in CTH OE and CBS OE mESCs or genes upregulated in both CTH OE, CBS OE and Lmna-/- mESCs. Log2 fold change ≥ 0.58; p-adjusted value <0.05
Gene ontology: biological process, p<1E-03
GO	Term	GROUP	Count	percent	PValue
GO:0006357	regulation of transcription by RNA polymerase II	CTH OE	299	9.67324	1.92372e-29
GO:0007283	spermatogenesis	CTH OE	136	4.39987	4.30057e-26
GO:0051301	cell division	CTH OE	96	3.10579	5.49135e-18
GO:0007129	homologous chromosome pairing at meiosis	CTH OE	28	0.905856	3.76812e-17
GO:0030154	cell differentiation	CTH OE	138	4.46457	4.68345e-17
GO:0007059	chromosome segregation	CTH OE	42	1.35878	3.51015e-15
GO:0045944	positive regulation of transcription by RNA polymerase II	CTH OE	207	6.69686	2.1116e-12
GO:0007140	male meiotic nuclear division	CTH OE	22	0.711744	4.36247e-12
GO:0007141	male meiosis I	CTH OE	19	0.614688	4.86392e-11
GO:0034587	piRNA processing	CTH OE	15	0.48528	6.33636e-11
GO:0006355	regulation of DNA-templated transcription	CTH OE	166	5.37043	6.66108e-10
GO:0045893	positive regulation of DNA-templated transcription	CTH OE	132	4.27046	1.56999e-09
GO:0071805	potassium ion transmembrane transport	CTH OE	42	1.35878	1.88864e-09
GO:0006281	DNA repair	CTH OE	64	2.07053	2.25011e-09
GO:0048477	oogenesis	CTH OE	23	0.744096	2.64924e-09
GO:0006338	chromatin remodeling	CTH OE	116	3.75283	4.19736e-09
GO:0006813	potassium ion transport	CTH OE	29	0.938208	4.25755e-09
GO:0060271	cilium assembly	CTH OE	54	1.74701	5.92273e-09
GO:0051321	meiotic cell cycle	CTH OE	38	1.22938	2.06274e-08
GO:0006974	DNA damage response	CTH OE	68	2.19994	2.95908e-08
GO:0000724	double-strand break repair via homologous recombination	CTH OE	30	0.97056	3.63048e-08
GO:0035725	sodium ion transmembrane transport	CTH OE	35	1.13232	1.22271e-07
GO:0007099	centriole replication	CTH OE	14	0.452928	1.46713e-07
GO:0008608	attachment of spindle microtubules to kinetochore	CTH OE	12	0.388224	1.49386e-07
GO:0007131	reciprocal meiotic recombination	CTH OE	15	0.48528	1.61159e-07
GO:0045494	photoreceptor cell maintenance	CTH OE	19	0.614688	3.27876e-07
GO:1990573	potassium ion import across plasma membrane	CTH OE	18	0.582336	4.21094e-07
GO:0042391	regulation of membrane potential	CTH OE	28	0.905856	5.25981e-07
GO:0007268	chemical synaptic transmission	CTH OE	37	1.19702	6.09836e-07
GO:0019827	stem cell population maintenance	CTH OE	21	0.679392	6.77601e-07
GO:0007411	axon guidance	CTH OE	43	1.39114	8.58312e-07
GO:0000122	negative regulation of transcription by RNA polymerase II	CTH OE	148	4.78809	1.09577e-06
GO:0007094	mitotic spindle assembly checkpoint signaling	CTH OE	15	0.48528	1.15858e-06
GO:0031175	neuron projection development	CTH OE	41	1.32643	3.68979e-06
GO:0072659	protein localization to plasma membrane	CTH OE	38	1.22938	3.73074e-06
GO:0007130	synaptonemal complex assembly	CTH OE	13	0.420576	3.75472e-06
GO:0007420	brain development	CTH OE	47	1.52054	4.56423e-06
GO:0007010	cytoskeleton organization	CTH OE	34	1.09997	6.09045e-06
GO:0050804	modulation of chemical synaptic transmission	CTH OE	34	1.09997	7.09882e-06
GO:0048168	regulation of neuronal synaptic plasticity	CTH OE	14	0.452928	7.53117e-06
GO:0035556	intracellular signal transduction	CTH OE	73	2.3617	8.5636e-06
GO:0042276	error-prone translesion synthesis	CTH OE	8	0.258816	8.6627e-06
GO:0141196	transposable element silencing by piRNA-mediated DNA methylation	CTH OE	10	0.32352	1.07429e-05
GO:0000278	mitotic cell cycle	CTH OE	27	0.873504	1.55236e-05
GO:0034220	monoatomic ion transmembrane transport	CTH OE	24	0.776448	1.68069e-05
GO:0007018	microtubule-based movement	CTH OE	22	0.711744	2.02575e-05
GO:0051649	establishment of localization in cell	CTH OE	43	1.39114	3.00229e-05
GO:0000070	mitotic sister chromatid segregation	CTH OE	13	0.420576	3.03726e-05
GO:0006816	calcium ion transport	CTH OE	27	0.873504	3.06517e-05
GO:1905515	non-motile cilium assembly	CTH OE	19	0.614688	3.42016e-05
GO:0007173	epidermal growth factor receptor signaling pathway	CTH OE	24	0.776448	4.26902e-05
GO:0051382	kinetochore assembly	CTH OE	8	0.258816	4.77355e-05
GO:0001714	endodermal cell fate specification	CTH OE	6	0.194112	5.30336e-05
GO:1903861	positive regulation of dendrite extension	CTH OE	12	0.388224	5.75864e-05
GO:0010460	positive regulation of heart rate	CTH OE	12	0.388224	5.75864e-05
GO:0051026	chiasma assembly	CTH OE	7	0.226464	6.15238e-05
GO:0007601	visual perception	CTH OE	32	1.03526	6.29235e-05
GO:0048863	stem cell differentiation	CTH OE	21	0.679392	6.73721e-05
GO:0007613	memory	CTH OE	28	0.905856	7.18248e-05
GO:0007127	meiosis I	CTH OE	8	0.258816	9.45262e-05
GO:0008104	protein localization	CTH OE	40	1.29408	9.50704e-05
GO:0042472	inner ear morphogenesis	CTH OE	20	0.64704	0.000100512
GO:0071277	cellular response to calcium ion	CTH OE	22	0.711744	0.000112763
GO:0007052	mitotic spindle organization	CTH OE	16	0.517632	0.00013984
GO:0009566	fertilization	CTH OE	18	0.582336	0.000150693
GO:0007399	nervous system development	CTH OE	54	1.74701	0.000158449
GO:1900273	positive regulation of long-term synaptic potentiation	CTH OE	12	0.388224	0.000162138
GO:0051480	regulation of cytosolic calcium ion concentration	CTH OE	15	0.48528	0.000162834
GO:0051984	positive regulation of chromosome segregation	CTH OE	8	0.258816	0.000172809
GO:1990918	double-strand break repair involved in meiotic recombination	CTH OE	8	0.258816	0.000172809
GO:0002027	regulation of heart rate	CTH OE	14	0.452928	0.000185968
GO:0051726	regulation of cell cycle	CTH OE	44	1.42349	0.000196761
GO:0003341	cilium movement	CTH OE	16	0.517632	0.00021997
GO:0031547	brain-derived neurotrophic factor receptor signaling pathway	CTH OE	16	0.517632	0.00021997
GO:0000902	cell morphogenesis	CTH OE	30	0.97056	0.000248206
GO:0035790	platelet-derived growth factor receptor-alpha signaling pathway	CTH OE	15	0.48528	0.000261826
GO:0001508	action potential	CTH OE	15	0.48528	0.000261826
GO:0050885	neuromuscular process controlling balance	CTH OE	18	0.582336	0.00027186
GO:2000463	positive regulation of excitatory postsynaptic potential	CTH OE	13	0.420576	0.000271932
GO:0000012	single strand break repair	CTH OE	8	0.258816	0.000296224
GO:0090307	mitotic spindle assembly	CTH OE	14	0.452928	0.000307242
GO:0006915	apoptotic process	CTH OE	85	2.74992	0.00033322
GO:0051965	positive regulation of synapse assembly	CTH OE	20	0.64704	0.000351276
GO:0000082	G1/S transition of mitotic cell cycle	CTH OE	19	0.614688	0.000373985
GO:0007612	learning	CTH OE	19	0.614688	0.000373985
GO:0098655	monoatomic cation transmembrane transport	CTH OE	14	0.452928	0.000389688
GO:0048167	regulation of synaptic plasticity	CTH OE	18	0.582336	0.000393279
GO:0006874	intracellular calcium ion homeostasis	CTH OE	25	0.8088	0.000395856
GO:0007626	locomotory behavior	CTH OE	27	0.873504	0.000458592
GO:0007548	sex differentiation	CTH OE	8	0.258816	0.000481525
GO:0030198	extracellular matrix organization	CTH OE	34	1.09997	0.000491592
GO:0006094	gluconeogenesis	CTH OE	15	0.48528	0.000504939
GO:0035791	platelet-derived growth factor receptor-beta signaling pathway	CTH OE	15	0.48528	0.000504939
GO:0022008	neurogenesis	CTH OE	27	0.873504	0.00051797
GO:0001701	in utero embryonic development	CTH OE	57	1.84406	0.000533121
GO:0007368	determination of left/right symmetry	CTH OE	20	0.64704	0.000567868
GO:0001947	heart looping	CTH OE	17	0.549984	0.000589038
GO:1902476	chloride transmembrane transport	CTH OE	24	0.776448	0.000658547
GO:0050808	synapse organization	CTH OE	20	0.64704	0.000662011
GO:0060079	excitatory postsynaptic potential	CTH OE	17	0.549984	0.000703422
GO:0019228	neuronal action potential	CTH OE	15	0.48528	0.000756689
GO:0036323	vascular endothelial growth factor receptor-1 signaling pathway	CTH OE	14	0.452928	0.000757834
GO:0006629	lipid metabolic process	CTH OE	40	1.29408	0.00076719
GO:0007155	cell adhesion	CTH OE	76	2.45875	0.000769245
GO:0000226	microtubule cytoskeleton organization	CTH OE	29	0.938208	0.000791243
GO:0070588	calcium ion transmembrane transport	CTH OE	25	0.8088	0.000848092
GO:0007292	female gamete generation	CTH OE	6	0.194112	0.000860981
GO:0051256	mitotic spindle midzone assembly	CTH OE	6	0.194112	0.000860981
GO:0031297	replication fork processing	CTH OE	12	0.388224	0.000863985
GO:0016567	protein ubiquitination	CTH OE	66	2.13523	0.000921191
GO:0010628	positive regulation of gene expression	CTH OE	83	2.68522	0.00094418
GO:0060041	retina development in camera-type eye	CTH OE	23	0.744096	0.000959114
GO:0045665	negative regulation of neuron differentiation	CTH OE	19	0.614688	0.000981844
GO:0007283	spermatogenesis	CTH OE and Lmna-/-	107	4.50716	5.93359e-21
GO:0007129	homologous chromosome pairing at meiosis	CTH OE and Lmna-/-	25	1.05307	2.41009e-16
GO:0030154	cell differentiation	CTH OE and Lmna-/-	114	4.80202	5.55558e-16
GO:0007140	male meiotic nuclear division	CTH OE and Lmna-/-	21	0.884583	3.59024e-13
GO:0007141	male meiosis I	CTH OE and Lmna-/-	18	0.758214	8.87952e-12
GO:0006357	regulation of transcription by RNA polymerase II	CTH OE and Lmna-/-	195	8.21398	9.53758e-12
GO:0034587	piRNA processing	CTH OE and Lmna-/-	14	0.589722	5.00894e-11
GO:0071805	potassium ion transmembrane transport	CTH OE and Lmna-/-	37	1.55855	7.1025e-10
GO:0045494	photoreceptor cell maintenance	CTH OE and Lmna-/-	19	0.800337	5.64798e-09
GO:0048477	oogenesis	CTH OE and Lmna-/-	20	0.84246	7.36868e-09
GO:1990573	potassium ion import across plasma membrane	CTH OE and Lmna-/-	18	0.758214	8.79709e-09
GO:0006813	potassium ion transport	CTH OE and Lmna-/-	25	1.05307	9.54422e-09
GO:0007411	axon guidance	CTH OE and Lmna-/-	40	1.68492	1.75482e-08
GO:0007130	synaptonemal complex assembly	CTH OE and Lmna-/-	13	0.547599	2.21176e-07
GO:0051301	cell division	CTH OE and Lmna-/-	59	2.48526	2.46335e-07
GO:0035725	sodium ion transmembrane transport	CTH OE and Lmna-/-	29	1.22157	5.24226e-07
GO:0007131	reciprocal meiotic recombination	CTH OE and Lmna-/-	13	0.547599	5.71604e-07
GO:0051321	meiotic cell cycle	CTH OE and Lmna-/-	30	1.26369	6.61654e-07
GO:0007601	visual perception	CTH OE and Lmna-/-	31	1.30581	9.37678e-07
GO:0141196	transposable element silencing by piRNA-mediated DNA methylation	CTH OE and Lmna-/-	10	0.42123	1.1882e-06
GO:0060271	cilium assembly	CTH OE and Lmna-/-	40	1.68492	2.53276e-06
GO:0072659	protein localization to plasma membrane	CTH OE and Lmna-/-	32	1.34794	4.79799e-06
GO:0042391	regulation of membrane potential	CTH OE and Lmna-/-	22	0.926706	1.08055e-05
GO:0000724	double-strand break repair via homologous recombination	CTH OE and Lmna-/-	22	0.926706	1.08055e-05
GO:0007155	cell adhesion	CTH OE and Lmna-/-	69	2.90649	1.13345e-05
GO:0051649	establishment of localization in cell	CTH OE and Lmna-/-	37	1.55855	1.24368e-05
GO:0051026	chiasma assembly	CTH OE and Lmna-/-	7	0.294861	1.34234e-05
GO:0035790	platelet-derived growth factor receptor-alpha signaling pathway	CTH OE and Lmna-/-	15	0.631845	1.47268e-05
GO:0048168	regulation of neuronal synaptic plasticity	CTH OE and Lmna-/-	12	0.505476	1.98314e-05
GO:0007018	microtubule-based movement	CTH OE and Lmna-/-	19	0.800337	2.16902e-05
GO:0009566	fertilization	CTH OE and Lmna-/-	17	0.716091	2.2072e-05
GO:0007173	epidermal growth factor receptor signaling pathway	CTH OE and Lmna-/-	21	0.884583	2.67584e-05
GO:0007268	chemical synaptic transmission	CTH OE and Lmna-/-	28	1.17944	3.10556e-05
GO:1990918	double-strand break repair involved in meiotic recombination	CTH OE and Lmna-/-	8	0.336984	3.15876e-05
GO:0006816	calcium ion transport	CTH OE and Lmna-/-	23	0.968829	3.38704e-05
GO:0045944	positive regulation of transcription by RNA polymerase II	CTH OE and Lmna-/-	138	5.81297	3.91171e-05
GO:0034220	monoatomic ion transmembrane transport	CTH OE and Lmna-/-	20	0.84246	4.04703e-05
GO:0051480	regulation of cytosolic calcium ion concentration	CTH OE and Lmna-/-	14	0.589722	4.35814e-05
GO:0007059	chromosome segregation	CTH OE and Lmna-/-	22	0.926706	4.43596e-05
GO:0031175	neuron projection development	CTH OE and Lmna-/-	32	1.34794	4.67987e-05
GO:0031547	brain-derived neurotrophic factor receptor signaling pathway	CTH OE and Lmna-/-	15	0.631845	4.76152e-05
GO:0036323	vascular endothelial growth factor receptor-1 signaling pathway	CTH OE and Lmna-/-	14	0.589722	5.52025e-05
GO:0007099	centriole replication	CTH OE and Lmna-/-	10	0.42123	5.69472e-05
GO:0008104	protein localization	CTH OE and Lmna-/-	34	1.43218	5.84713e-05
GO:0002027	regulation of heart rate	CTH OE and Lmna-/-	13	0.547599	6.18323e-05
GO:0001508	action potential	CTH OE and Lmna-/-	14	0.589722	6.94237e-05
GO:0038145	macrophage colony-stimulating factor signaling pathway	CTH OE and Lmna-/-	14	0.589722	8.67145e-05
GO:1900273	positive regulation of long-term synaptic potentiation	CTH OE and Lmna-/-	11	0.463353	8.8315e-05
GO:0038109	Kit signaling pathway	CTH OE and Lmna-/-	14	0.589722	0.000107608
GO:1902476	chloride transmembrane transport	CTH OE and Lmna-/-	22	0.926706	0.000116794
GO:0019827	stem cell population maintenance	CTH OE and Lmna-/-	15	0.631845	0.000132251
GO:0035791	platelet-derived growth factor receptor-beta signaling pathway	CTH OE and Lmna-/-	14	0.589722	0.000132706
GO:0042472	inner ear morphogenesis	CTH OE and Lmna-/-	17	0.716091	0.000140688
GO:0038084	vascular endothelial growth factor signaling pathway	CTH OE and Lmna-/-	15	0.631845	0.000159712
GO:0003341	cilium movement	CTH OE and Lmna-/-	14	0.589722	0.000198303
GO:0060041	retina development in camera-type eye	CTH OE and Lmna-/-	21	0.884583	0.000200944
GO:0010460	positive regulation of heart rate	CTH OE and Lmna-/-	10	0.42123	0.000211129
GO:0048012	hepatocyte growth factor receptor signaling pathway	CTH OE and Lmna-/-	14	0.589722	0.000240399
GO:1905515	non-motile cilium assembly	CTH OE and Lmna-/-	15	0.631845	0.000273562
GO:0006355	regulation of DNA-templated transcription	CTH OE and Lmna-/-	111	4.67565	0.000277636
GO:0007010	cytoskeleton organization	CTH OE and Lmna-/-	25	1.05307	0.000316185
GO:0006629	lipid metabolic process	CTH OE and Lmna-/-	34	1.43218	0.000394932
GO:0038063	collagen-activated tyrosine kinase receptor signaling pathway	CTH OE and Lmna-/-	14	0.589722	0.000415359
GO:0009888	tissue development	CTH OE and Lmna-/-	13	0.547599	0.000437874
GO:0090307	mitotic spindle assembly	CTH OE and Lmna-/-	12	0.505476	0.000443849
GO:0042276	error-prone translesion synthesis	CTH OE and Lmna-/-	6	0.252738	0.000467251
GO:0048546	digestive tract morphogenesis	CTH OE and Lmna-/-	8	0.336984	0.00047425
GO:0007094	mitotic spindle assembly checkpoint signaling	CTH OE and Lmna-/-	10	0.42123	0.000615535
GO:0055075	potassium ion homeostasis	CTH OE and Lmna-/-	8	0.336984	0.000664771
GO:0030198	extracellular matrix organization	CTH OE and Lmna-/-	28	1.17944	0.000665279
GO:0001764	neuron migration	CTH OE and Lmna-/-	25	1.05307	0.000697037
GO:0055085	transmembrane transport	CTH OE and Lmna-/-	31	1.30581	0.000711922
GO:0007015	actin filament organization	CTH OE and Lmna-/-	25	1.05307	0.000765308
GO:0040011	locomotion	CTH OE and Lmna-/-	7	0.294861	0.000801647
GO:0071277	cellular response to calcium ion	CTH OE and Lmna-/-	17	0.716091	0.000929476
GO:0045893	positive regulation of DNA-templated transcription	CTH OE and Lmna-/-	85	3.58045	0.000939595
GO:0008543	fibroblast growth factor receptor signaling pathway	CTH OE and Lmna-/-	19	0.800337	0.000946716
GO:0007129	homologous chromosome pairing at meiosis	CBS OE	27	1.1775	3.51633e-19
GO:0007283	spermatogenesis	CBS OE	101	4.40471	4.57653e-19
GO:0051301	cell division	CBS OE	80	3.48888	1.16466e-17
GO:0007059	chromosome segregation	CBS OE	37	1.61361	1.96444e-15
GO:0006357	regulation of transcription by RNA polymerase II	CBS OE	199	8.67859	2.99553e-14
GO:0006260	DNA replication	CBS OE	34	1.48277	1.87002e-13
GO:0006281	DNA repair	CBS OE	60	2.61666	8.56484e-13
GO:0007140	male meiotic nuclear division	CBS OE	19	0.828609	3.02399e-11
GO:0030154	cell differentiation	CBS OE	99	4.31749	3.32307e-11
GO:0006974	DNA damage response	CBS OE	62	2.70388	6.09552e-11
GO:0007131	reciprocal meiotic recombination	CBS OE	16	0.697776	2.77279e-10
GO:0031297	replication fork processing	CBS OE	18	0.784998	3.31742e-10
GO:0000724	double-strand break repair via homologous recombination	CBS OE	27	1.1775	4.93839e-09
GO:0007141	male meiosis I	CBS OE	15	0.654165	1.05366e-08
GO:0048477	oogenesis	CBS OE	19	0.828609	2.78896e-08
GO:0006270	DNA replication initiation	CBS OE	13	0.566943	5.16085e-08
GO:0007130	synaptonemal complex assembly	CBS OE	13	0.566943	1.50109e-07
GO:0000070	mitotic sister chromatid segregation	CBS OE	14	0.610554	1.64984e-07
GO:0034587	piRNA processing	CBS OE	11	0.479721	2.27808e-07
GO:0007094	mitotic spindle assembly checkpoint signaling	CBS OE	14	0.610554	2.53851e-07
GO:0051321	meiotic cell cycle	CBS OE	30	1.30833	3.18346e-07
GO:0000727	double-strand break repair via break-induced replication	CBS OE	9	0.392499	3.21959e-07
GO:0051026	chiasma assembly	CBS OE	8	0.348888	3.65795e-07
GO:0009566	fertilization	CBS OE	19	0.828609	6.55766e-07
GO:0006355	regulation of DNA-templated transcription	CBS OE	120	5.23332	8.70123e-07
GO:0141196	transposable element silencing by piRNA-mediated DNA methylation	CBS OE	10	0.43611	8.80654e-07
GO:0019827	stem cell population maintenance	CBS OE	18	0.784998	9.36329e-07
GO:0008608	attachment of spindle microtubules to kinetochore	CBS OE	10	0.43611	1.64573e-06
GO:1990918	double-strand break repair involved in meiotic recombination	CBS OE	9	0.392499	1.70772e-06
GO:0048863	stem cell differentiation	CBS OE	20	0.87222	3.33787e-06
GO:0034080	CENP-A containing chromatin assembly	CBS OE	7	0.305277	1.09258e-05
GO:0006279	premeiotic DNA replication	CBS OE	6	0.261666	1.21189e-05
GO:0090307	mitotic spindle assembly	CBS OE	14	0.610554	1.40135e-05
GO:0000278	mitotic cell cycle	CBS OE	22	0.959442	3.53265e-05
GO:0006508	proteolysis	CBS OE	73	3.1836	3.89976e-05
GO:0001701	in utero embryonic development	CBS OE	49	2.13694	5.18955e-05
GO:0006816	calcium ion transport	CBS OE	22	0.959442	6.17938e-05
GO:0001890	placenta development	CBS OE	15	0.654165	7.44939e-05
GO:0051382	kinetochore assembly	CBS OE	7	0.305277	9.90034e-05
GO:0032259	methylation	CBS OE	26	1.13389	9.90411e-05
GO:0000082	G1/S transition of mitotic cell cycle	CBS OE	17	0.741387	0.000109835
GO:1990830	cellular response to leukemia inhibitory factor	CBS OE	43	1.87527	0.000111833
GO:0006813	potassium ion transport	CBS OE	18	0.784998	0.000113763
GO:1902975	mitotic DNA replication initiation	CBS OE	5	0.218055	0.000137791
GO:0051480	regulation of cytosolic calcium ion concentration	CBS OE	13	0.566943	0.000140757
GO:0010971	positive regulation of G2/M transition of mitotic cell cycle	CBS OE	10	0.43611	0.000161261
GO:0007127	meiosis I	CBS OE	7	0.305277	0.000172391
GO:0043066	negative regulation of apoptotic process	CBS OE	75	3.27082	0.000265837
GO:0006325	chromatin organization	CBS OE	38	1.65722	0.000279193
GO:0042446	hormone biosynthetic process	CBS OE	7	0.305277	0.000282888
GO:0006261	DNA-templated DNA replication	CBS OE	10	0.43611	0.000283812
GO:0098609	cell-cell adhesion	CBS OE	30	1.30833	0.000325625
GO:0007052	mitotic spindle organization	CBS OE	13	0.566943	0.000382376
GO:0035878	nail development	CBS OE	5	0.218055	0.000389136
GO:0006271	DNA strand elongation involved in DNA replication	CBS OE	5	0.218055	0.000389136
GO:2000042	negative regulation of double-strand break repair via homologous recombination	CBS OE	9	0.392499	0.000398998
GO:0007411	axon guidance	CBS OE	29	1.26472	0.000439889
GO:0010468	regulation of gene expression	CBS OE	52	2.26777	0.000529246
GO:0035556	intracellular signal transduction	CBS OE	52	2.26777	0.000589602
GO:0008543	fibroblast growth factor receptor signaling pathway	CBS OE	19	0.828609	0.000627463
GO:0043524	negative regulation of neuron apoptotic process	CBS OE	30	1.30833	0.000628834
GO:0031573	mitotic intra-S DNA damage checkpoint signaling	CBS OE	7	0.305277	0.000663497
GO:2000001	regulation of DNA damage checkpoint	CBS OE	7	0.305277	0.000663497
GO:0000077	DNA damage checkpoint signaling	CBS OE	12	0.523332	0.000715904
GO:0007268	chemical synaptic transmission	CBS OE	24	1.04666	0.000761419
GO:0008284	positive regulation of cell population proliferation	CBS OE	67	2.92194	0.000793509
GO:0008584	male gonad development	CBS OE	24	1.04666	0.000834885
GO:0034502	protein localization to chromosome	CBS OE	5	0.218055	0.000854885
GO:0010569	regulation of double-strand break repair via homologous recombination	CBS OE	7	0.305277	0.00096181
GO:0007129	homologous chromosome pairing at meiosis	CBS OE and Lmna-/-	23	1.39988	2.38771e-17
GO:0007283	spermatogenesis	CBS OE and Lmna-/-	75	4.56482	1.04303e-14
GO:0030154	cell differentiation	CBS OE and Lmna-/-	80	4.86914	1.54234e-11
GO:0007140	male meiotic nuclear division	CBS OE and Lmna-/-	17	1.03469	2.51948e-11
GO:0007141	male meiosis I	CBS OE and Lmna-/-	14	0.8521	2.00989e-09
GO:0034587	piRNA processing	CBS OE and Lmna-/-	11	0.669507	9.82904e-09
GO:0007130	synaptonemal complex assembly	CBS OE and Lmna-/-	12	0.730371	5.14796e-08
GO:0048477	oogenesis	CBS OE and Lmna-/-	16	0.973828	8.02929e-08
GO:0009566	fertilization	CBS OE and Lmna-/-	17	1.03469	1.89274e-07
GO:0051301	cell division	CBS OE and Lmna-/-	45	2.73889	7.97535e-07
GO:0141196	transposable element silencing by piRNA-mediated DNA methylation	CBS OE and Lmna-/-	9	0.547778	9.45204e-07
GO:0051026	chiasma assembly	CBS OE and Lmna-/-	7	0.42605	1.57778e-06
GO:0006813	potassium ion transport	CBS OE and Lmna-/-	17	1.03469	7.21905e-06
GO:0001890	placenta development	CBS OE and Lmna-/-	14	0.8521	9.86634e-06
GO:0007059	chromosome segregation	CBS OE and Lmna-/-	19	1.15642	1.06846e-05
GO:0006357	regulation of transcription by RNA polymerase II	CBS OE and Lmna-/-	123	7.48631	1.1736e-05
GO:0007131	reciprocal meiotic recombination	CBS OE and Lmna-/-	10	0.608643	1.19971e-05
GO:0048863	stem cell differentiation	CBS OE and Lmna-/-	16	0.973828	1.44032e-05
GO:0051480	regulation of cytosolic calcium ion concentration	CBS OE and Lmna-/-	12	0.730371	3.19875e-05
GO:0007411	axon guidance	CBS OE and Lmna-/-	26	1.58247	3.26208e-05
GO:0006508	proteolysis	CBS OE and Lmna-/-	57	3.46926	3.65017e-05
GO:0042446	hormone biosynthetic process	CBS OE and Lmna-/-	7	0.42605	4.48278e-05
GO:1990918	double-strand break repair involved in meiotic recombination	CBS OE and Lmna-/-	7	0.42605	4.48278e-05
GO:0001701	in utero embryonic development	CBS OE and Lmna-/-	39	2.37371	4.52797e-05
GO:0051321	meiotic cell cycle	CBS OE and Lmna-/-	21	1.27815	4.86971e-05
GO:0008584	male gonad development	CBS OE and Lmna-/-	22	1.33901	5.80918e-05
GO:0035878	nail development	CBS OE and Lmna-/-	5	0.304321	0.000106906
GO:0008543	fibroblast growth factor receptor signaling pathway	CBS OE and Lmna-/-	17	1.03469	0.000124539
GO:0043066	negative regulation of apoptotic process	CBS OE and Lmna-/-	59	3.59099	0.000142845
GO:0071805	potassium ion transmembrane transport	CBS OE and Lmna-/-	21	1.27815	0.000155473
GO:0007268	chemical synaptic transmission	CBS OE and Lmna-/-	21	1.27815	0.000155473
GO:0051382	kinetochore assembly	CBS OE and Lmna-/-	6	0.365186	0.000237141
GO:0006816	calcium ion transport	CBS OE and Lmna-/-	17	1.03469	0.000267597
GO:0007613	memory	CBS OE and Lmna-/-	18	1.09556	0.000288271
GO:0010526	transposable element silencing	CBS OE and Lmna-/-	6	0.365186	0.000368594
GO:0007127	meiosis I	CBS OE and Lmna-/-	6	0.365186	0.000368594
GO:0090307	mitotic spindle assembly	CBS OE and Lmna-/-	10	0.608643	0.000494584
GO:0031547	brain-derived neurotrophic factor receptor signaling pathway	CBS OE and Lmna-/-	11	0.669507	0.000545965
GO:0003341	cilium movement	CBS OE and Lmna-/-	11	0.669507	0.000545965
GO:0006633	fatty acid biosynthetic process	CBS OE and Lmna-/-	12	0.730371	0.000556117
GO:0050808	synapse organization	CBS OE and Lmna-/-	14	0.8521	0.000564422
GO:0140965	secondary piRNA processing	CBS OE and Lmna-/-	4	0.243457	0.00056578
GO:0010971	positive regulation of G2/M transition of mitotic cell cycle	CBS OE and Lmna-/-	8	0.486914	0.000633938
GO:0043524	negative regulation of neuron apoptotic process	CBS OE and Lmna-/-	24	1.46074	0.000639561
GO:0036323	vascular endothelial growth factor receptor-1 signaling pathway	CBS OE and Lmna-/-	10	0.608643	0.00094846
GO:0007601	visual perception	CBS OE and Lmna-/-	19	1.15642	0.000984953
GO:0060384	innervation	CBS OE and Lmna-/-	7	0.42605	0.000999595

## Sheet: Extended Data Fig.6f
Extended Data Fig.6f: Overlap of the genes downregulated in Lmna G609G/G609G mESCs with genes upregulated in CTH OE and CBS OE mESCs. Log2 fold change ≤- 0.58, ≥ 0.58; p-adjusted value <0.05
Genes down-regulated in Lmna G609G/G609G vs Control	Genes up-regulated in CTH OE vs. Ctrl	Genes up-regulated in CBS OE vs. Ctrl
Myl4	Fbxo41	Fbxo41
Adgrg6	Taf9b	Zfp456
Smim29	Primpol	Slc35d2
Rab11fip5	Zfp456	Plekha8
Slc13a5	Thnsl1	Usp17ld
Ypel2	Slc35d2	Prss48
Itgb4	Plekha8	Rtel1
Epb41l1	Ttyh1	Nol4l
Rtn1	Sohlh1	Zfp948
Asap3	Nol4l	Kcnq2
Pde2a	Panx2	Masp2
Txnip	Tdrd1	Kdm2b
Sesn1	Pram1	Zfp619
Grhl3	Kcnq2	Slc13a5
Capn11	Mars1	AU018091
Ccdc92b	Senp7	9930012K11Rik
Abi3bp	Zfp619	Sgpp2
Zfyve28	Ckap2	Slc28a1
Rap1gap2	Slc13a5	Rexo5
Cox17	AU018091	Zfp560
Pla2g4f	9930012K11Rik	Cntnap2
Mctp2	Scarf1	Pla2g4c
Rhox10	Celsr2	Ypel2
Ankrd34a	Whamm	Mreg
Rhox1	Rexo5	Zcwpw1
Pik3cd	Zfp560	Rsrc2
Rnf17	Amigo1	Itgb4
Sdhaf1	Gprasp1	Zfp69
Tmem181a	Asap2	Phactr3
Ezhip	Scube3	Slc7a6os
AU021092	Tacc2	Maneal
Itga1	Pla2g4c	Btbd8
Gm9	Ypel2	Pramel20
Nlrc4	Sp9	Cdsn
Gfod1	Ppp1r26	Zfp975
Treml2	Mreg	Zfp760
Cdkl4	Zcwpw1	Adora1
Tnfaip8l3	Rsrc2	Whrn
Crxos	Itgb4	Naaladl1
Fbxw10	Zfp69	Slc38a8
Tmem253	Phactr3	Cep44
Ak8	Adam22	Mdc1
Thnsl2	Zdhhc23	Hrh2
Tnfsfm13	Rffl	Birc5
Mansc4	Slc25a42	Mdk
Fbxo40	Btbd8	Nrp
Rusc2	Tceanc	Tmprss13
Xaf1	Rtn1	Arhgef39
Timm8a2	Zfp975	Rsad1
Mapt	Zfp760	Ric8b
Fthl17f	Whrn	Trim6
Rcsd1	Naaladl1	Zfp57
Aifm2	Unc13d	Zscan4c
Zfhx2	Slc38a8	Capn11
Catsperz	Cep44	Ccdc92b
Tesmin	Mdc1	Fam169b
BC051019	Xkr7	Eif1ad7
Cd74	Birc5	Zfp985
Sstr2	Mdk	Espl1
Smad7	Hs3st6	Zfyve28
Slc22a18	Acd	E130308A19Rik
Proc	Smim19	Cox17
Fcgr2b	Zfp787	Kbtbd7
Fhl1	Odf3b	Nxf3
Fmnl1	Tmem263	Pla2g4f
Brdt	Ctc1	Zfp873
Cenpm	Npcd	Carmil3
Aff1	Nrp	Mctp2
Cps1	Arhgef39	Apol7b
Aurkc	Uspl1	Rhox10
Tmsb15b2	Grm4	Timm9
Tead4	Rasl10b	Septin10
Cfap91	Ercc6l2	Zfp563
Dennd3	Ddn	Arl14ep
Rgs11	Zfp57	Zfp78
Grik3	Tmem151b	Orc2
Chrna9	Lingo3	Dmbx1
Rap1gap	Capn11	Unc13a
Mdga1	Ccdc92b	Lonrf2
Aspg	Zscan26	Zswim5
Prdm14	Dupd1	Trim38
2310009B15Rik	Adgrf3	Kcp
Nlrc3	Zmynd12	Pecam1
Adgrd1	Espl1	Rnf17
Rhobtb1	Zfyve28	Ntrk1
Cped1	Rap1gap2	Commd6
Cystm1	E130308A19Rik	Ecscr
Ctcfl	Zdhhc18	Selenoh
Ptprq	Izumo1	Naa11
Ankrd44	Trim15	AU015228
Ccnd3	Kbtbd7	Pls1
Tex264	Gpr139	Ezhip
Nup62cl	Fbxo10	Cln5
Sap25	Pla2g4f	Fancd2
Tmsb15b1	Bcat1	Pak6
Lhx6	Rabl6	Stox1
Ttll9	Zfp873	Agap2
Mcc	Carmil3	Gls2
Steap3	Lrp3	Gm525
Cisd3	Rhox10	Cryzl2
Fam131c	Septin10	Sbspon
Fthl17c	N4bp2	Zfp217
Slc2a7	Rbfox3	Myrfl
Aadacl4fm2	Zfp563	Abcc4
Tcp11	Pbx4	Rimbp3
Tmem35b	Arl14ep	D430041D05Rik
Fthl17d	Trp53i11	Iqsec3
Rnf39	Sox6	Zfp568
Myof	Dmbx1	Pgr15l
Rbis	Unc13a	Mucl3
Tomm5	Nova2	Treml2
Clec2l	Lonrf2	Rbm44
Isoc2a	Zswim5	Rnf224
Acp5	Kcp	Ceacam16
Calml4	Pecam1	Trim75
Steap2	Lrrc14b	Arl14epl
Apoc1	Rnf17	Accsl
Ap1m2	Ntrk1	Cracr2a
Fxyd5	Bbs1	Bclaf3
Synj2	Commd6	Iqgap3
Entrep1	Rmdn3	Mfsd2b
Eif1ad3	Shcbp1l	Mageb4
Bdh1	2510002D24Rik	Bex6
Kit	Cln6	Slc47a2
Tm9sf5	Tmem181a	Acsl6
Gpr160	Skap1	Prex2
Megf11	C77080	Crxos
Ost4	Pls1	Pramel17
Nfatc2	Ezhip	Ubtfl1
Dpysl3	Ttc7b	Adamts17
Hsbp1l1	AU021092	Thnsl2
Nkain4	Trim40	Calca
Lmo2	Cln5	7420426K07Rik
Kctd1	Fancd2	Tnfsfm13
Eif4a3l1	Zfp583	Pramel31
Arhgap40	Lemd1	Tdpoz8
Mak	Pak6	Tlcd5
Ndrg2	Spata5l1	Mrgprx2
Rwdd2a	Phactr2	Ldc1
Als2cl	Arfgef3	Dnai2
Cacnb1	Mcu	Kbtbd6
Grid2ip	Zfc3h1	Zfp936
Esrrb	Agap2	Tmem92
Tnfsf13	Gls2	Zfp345
Proser2	Slc4a7	Mansc4
Gjb3	Cryzl2	Golm1
Grm2	Slc30a10	Setd6
Uqcc3	Sbspon	Atp2b2
Rin3	Ciart	Xaf1
Atp5mc1	Cox18	Strip2
Islr2	Vsig10	Timm8a2
Cdkn1c	Ccdc61	Ripply1
Tfeb	Myrfl	BC147527
Ang	Abcc4	Wdr93
Fbxo44	Cdc42bpg	Deptor
Sh3d21	Sec31b	Cldn19
Zfp931	D430041D05Rik	Mapt
Nudt17	Zfp568	Ric3
Rsph4a	Ntn5	Stk35
Micos10	Dcp1b	Zfp953
Tnik	Treml2	Elavl4
Lix1l	Rbm44	Tmod2
Lpar5	Lgr6	Klk13
Susd1	Rnf224	Trim63
Atp2a3	Ceacam16	Cox8c
1810010H24Rik	Tmem102	Prkcz
Sema4a	Lrch1	Mrpl1
Mideas	Cdkl4	Trpm1
Ppfibp2	Garem1	Hnrnpa1
Plxdc1	Drc1	Npr3
Sult6b1	Spef1l	Ceacam1
Etfrf1	Bclaf3	Rreb1
Wnt7b	Iqgap3	Zfp982
Naaa	BC048644	Zfp951
Fbxo6	Mfsd2b	Zfp808
Pde9a	Mageb4	Kcnj10
Pabpc6	AW554918	Catsperz
Stat5a	Tnfaip8l3	Gtf2a2
Slc66a2	Pgap3	Pigl
Ankrd33b	Slc47a2	Myo6
Cpsf4l	Acsl6	Rad54b
Vill	Dnah1	Glyctk
Zfp169	Tmem253	Gm20767
Dnajc6	Smagp	Tesmin
Arhgap8	Ak8	Mks1
Eomes	Adamts17	Sco1
Slc52a3	Thnsl2	Tet2
P2rx2	Calca	Tacc3
Rgs9	Asic2	Clmn
Ccdc152	Limk2	Rspo4
Mgll	Pramel31	Kntc1
Cspg5	Shank1	Arrdc4
Zyg11a	Tlcd5	Cd74
Trim36	Pnldc1	Nusap1
Prr13	Dnai2	Oip5
Nod1	Zfp936	Fzd5
Bdh2	Zfr2	Pcdh8
Cacna2d2	Tmem92	Slc22a18
Tfpi	Mansc4	Rad17
Myc	Golm1	Zfp2
Fam236f	Setd6	Mef2b
Cebpzos	Atp2b2	Prss38
Mymx	Agap1	Ccnjl
Plekhd1	Prok2	Tulp2
Ak4	Kcnh6	Lyrm9
Grin1	Xaf1	Gsta3
Ablim2	Arhgef10	Scn8a
Rapgef3	Arnt	Tsks
Zfp997	Strip2	Lrba
Zmym3	Gpx4	Sdhaf3
Dact1	Timm8a2	Hnrnph3
Ddx43	Btrc	Brdt
Rgs22	Sgk3	Gsg1
Map7	Wdr93	Ret
Pierce2	Deptor	Cps1
Slc29a1	Dusp22	Rbpj
Slc44a2	Cldn19	Tead4
Pnck	Marveld2	Brca2
Topaz1	Mapt	Etl4
Magec2	Ric3	Cacna1s
1700013H16Rik	Stk35	Cfap91
Gm14295	Gng2	Dock9
Gsn	Tmod2	Pdzd2
Faiml	Rnf38	Zfp707
Lcp1	Atp8a1	Dennd3
Rpl31	Kif5a	Cubn
Irf5	Klk13	Lrp2
D16Ertd472e	Trim63	Gpat2
Cmtm7	Ldb3	Grik3
Hfm1	Prkcz	Aunip
Dnajc12	Trpm1	Chrna9
Rnf128	Npr3	Ankrd26
Bmp8a	Rreb1	Nccrp1
Cbs	Aifm2	Gli2
Ephx2	Zfhx2	Adamts14
Xbp1	Zfp808	Cntnap3
Sema6c	Kcnd3	Ogdhl
AA414768	Kif21b	Dhtkd1
Tle5	Kcnj10	Kcng1
Ampd3	Catsperz	Prrg3
Gm867	Wfdc10	Ankrd35
Fthl17-ps1	Pnkd	Kcnq4
Dazl	Pigl	Cyp2b23
Tekt1	Myo6	Mdga1
Cnga3	Rad54b	Aspg
Mroh6	Mroh8	Polr3g
Cobl	Glyctk	Adgrf5
Arhgap9	Tesmin	Focad
Ildr1	Mks1	Eml5
Lyrm1	Arhgap12	Crnn
Pacsin1	Zfp606	Prdm14
Camk2a	Sco1	Myo1a
Emp1	Tet2	Tln2
Tcl1	Flot2	Myh13
Mpv17l	Clmn	Alg6
Nell2	Zfp692	Dscaml1
Bmal2	Rspo4	Tbc1d4
Nxf2	Uevld	Ibtk
Cryab	Kntc1	Prr19
Ovol3	Blm	Arhgef26
Nanog	Arrdc4	C2cd4b
Zfp998	Hbs1l	Myo5c
Ism2	Nusap1	Zkscan2
Ftsj1	Oip5	Dnah2
Mzf1	Fzd5	Dgkh
Lrriq4	Smad7	Adgrd1
Scml2	Rbpms	Cystm1
Ppp1r14d	Ilf3	Chd5
Cd37	Ankdd1b	Kmt2c
Pla2g10	Pcdh8	Ctcfl
Tnfrsf25	Slc22a18	Tbc1d31
Cd68	Sema3b	Adamts3
Pcsk6	Zfp2	Plb1
Cib1	Zfp41	Agmat
Misp3	Mef2b	Unc13b
Kyat3	Mfge8	Fndc1
Polr3gl	Akna	Galnt16
Apod	Proca1	Fam184a
Fdx1	Fam83b	Ccdc15
Gjb1	Prss38	Nasp
Ldhb	Cep126	Camta1
Col13a1	Hsf5	Ccnd3
Nfkbie	Ccnjl	Rgs3
Pou6f1	Tulp2	Fam90a1a
Ccna1	Ttc21b	Tomt
E2f2	Lyrm9	Dnmt3l
Mad2l2	Scn8a	Dux
Spry1	Tsks	Clasp2
Ggt1	Lrba	Rnf144a
Ccdc116	Shprh	Sh3d19
Porcn	Srsf5	Pigyl
Robo4	Hnrnph3	Spint2
Synpo2l	Brdt	Sdr39u1
Specc1	Med1	Lig1
Fbxo17	Uhrf1bp1	Pars2
Cabp1	Ret	Liph
Khdc3	Ash2l	Slc12a8
Adissp	Cdc14a	Fetub
Bmf	Rapgefl1	Nr3c2
Ephx1	Sp2	Zfp991
Igf2	Tead4	Myh7b
Bmp4	Ddias	Pramel24
Etv4	Brca2	Cisd3
Sh3bp1	Etl4	Zbtb34
Ica1l	Cacna1s	Myom3
Mmp28	Kcnt2	Fam131c
Slc6a16	Tmem243	Myorg
Spa17	Pde11a	Pramel19
Adamts8	Srgap1	Zfp992
Uty	Dock9	Slc2a7
Ntan1	Slc25a18	Tmem235
Radx	Nhs	Pramel30
Prr5	Tecpr2	Tcp11
Cyp11a1	Pdzd2	Kif26a
Crb3	Zfp707	Nr1i2
Dcbld1	Dennd3	Ndufa4l2
Oas2	Rgs11	Tox2
Urah	Sapcd2	Pik3c2b
Cenpx	Gpat2	Duox1
Mylpf	Cep152	Ajap1
Sigirr	Grik3	Shisal2a
Paqr8	Aunip	Ctag2l1
Mcee	Morn1	Myh3
Zbtb7b	Ankrd26	Zscan4d
Ppcs	Nccrp1	Bicral
Gata2	Mki67	Pnma5
Polr1h	Gli2	Susd5
Extl1	Adamts14	Tmem233
Casq2	Cntnap3	Cyp4f40
Klf15	Ogdhl	Isoc2a
Lmna	Dhtkd1	Calml4
Ccdc163	Kcng1	Cnnm2
Ppdpf	Prrg3	Alkbh1
Agbl2	Ankrd35	Col6a6
Pla2g1b	Kcnq4	Kif19a
Crtac1	Marf1	Zfp980
Fndc3b	Rap1gap	Lin9
Pgm2	Mdga1	Tmc5
Uba1y	Phf21b	Gm11545
Eif2s3y	Aspg	Zfp185
Ldlrad4	Lama5	Aqp8
P4htm	Frmpd1	Bach2
Tmem266	Kif13b	C2cd5
Mpzl2	Focad	Cenpw
A930007A09Rik	Eml5	Trpc2
Lrrc75a	Hcn4	Apoc1
Slc38a4	Prdm14	Dzip3
Gstt1	Myo1a	Ppih
Srgn	Gpr179	Cdca2
Derl3	Ercc6	Lnpk
Hap1	Palb2	Ttk
Cavin1	Tln2	Zscan4f
Mlxipl	Myh13	Efcab12
Tmem106a	Fbxo43	Pclo
Fam229b	Kdm3b	Foxp4
8030474K03Rik	Alg6	Crem
Sh3tc1	Dscaml1	Cdc25b
Dkk3	Tbc1d4	Uhrf1
Mbnl2	Tmem28	Rad51ap2
Morn2	Mpp7	Ccnb1ip1
Stambpl1	Fam217b	Ubap1l
Msc	Prr19	Kcnip3
Acan	C2cd4b	Aldh3a1
Tmem63c	Myo5c	Nemp1
Gstp3	Mphosph9	Xkr5
Fam234b	Zkscan2	Boll
Lamtor2	Dnah2	Lifr
Plaat3	Slc9a5	Frrs1
Dgke	Plekhg4	Itga9
Mrps24	Cul9	Ltbp4
Pla2g4e	Dgkh	Glo1
Odad4	Sipa1l2	Cutc
Pts	L3mbtl1	Mtcl1
Lims2	Scaper	Fam189a2
Chst10	Adgrd1	Nedd4l
Piwil4	Chd2	Jmjd7
Nrsn2	Lrrc7	Mfsd4a
Vwa3b	Cenpf	Tasor
Shoc1	Cystm1	Kmt5c
Gm38999	Vps8	H2-M5
Gm19774	Chd5	Zbtb44
Ankrd31	Kmt2c	Eif1ad3
Gm14569	Ctcfl	Kit
Chrna5	Tbc1d31	Faim
Ccdc172	Prss33	Lepr
Gm4779	Plb1	Rad54l
Wfdc2	Unc13b	Cdc14b
Smim14	Galnt16	B3galt5
B3galt9	Rbm24	Eif4a2
Efna3	Fam184a	Pnp2
Gm14444	Ccdc15	Fam178b
Gm3739	Ino80d	Pramel16
Ydjc	Wdr86	Pramel21
Fkbp1b	Ncam1	Mroh7
Prss50	Ppp2r5c	Zfp534
Elf4	Mettl7a3	Sirt3
Notum	Camta1	Meioc
Gm9222	Ccnd3	Tspan32
Cfap92	Rgs3	Opn4
Gm53057	Neurl1b	Tm9sf5
Pzp	Klhl34	Hpca
Adora2b	Zfp800	Pttg1
Adrb1	Tomt	Gpr160
Nr0b1	Gnb1l	Megf11
Aplp1	Clasp2	Prr23a1
Fxyd2	Rnf144a	Iho1
Bid	Sh3d19	Cntfr
Bik	Pigyl	Poli
Cd3e	Spint2	Rbl1
Cd9	Sdr39u1	Tpx2
Cdx2	Ptpru	Gm14124
Socs3	Lig1	Nemp2
Col9a2	Mboat2	Eif4a3l1
Cox6a1	Disp3	Zfp949
Cox8a	Pars2	Syce1
Cplx1	Slc12a8	Ppfia4
Csrp2	Fetub	Gm13889
Cycs	Nr3c2	Btbd18
Efnb3	Kdf1	Sult6b2
Fbp2	Oas1b	Kcnt1
Fgfr4	Tle3	Mak
Gcm2	Myh7b	Nucks1
Gja4	Cisd3	Lrp4
Gsx1	Ppp1r3d	Gm14139
Guca1a	Zbtb34	Ddx4
Hand1	Tmem8b	Nat8f4
Hoxb13	Myom3	Pianp
Hoxb9	Fam131c	Ttc39a
Ifngr2	Myorg	Ndrg2
Inhbb	Slc2a7	Als2cl
Lamc2	Tmem235	Mtss1
Ltk	Tcp11	Msh5
Smad6	Dennd2d	Clcnka
Mras	Kif26a	Eng
Myom2	Zbtb3	Ezh2
Nfkb1	Ndufa4l2	Cacnb1
Pde8a	Tox2	Grid2ip
Rhox5	Pik3c2b	Ube2v2
Rhox6	Zfp541	Polq
Ptgs1	Arhgap44	Gjc1
S100a10	Duox1	B3gnt5
S100a13	Ajap1	Esrrb
Prrx2	Shisal2a	Tnfsf13
Selenbp1	Tmem35b	Grip2
St6galnac2	Zkscan16	Dpp4
Slc1a1	Rnf39	Sirt1
Sox15	D3Ertd751e	Lrrc57
Spink1	Bicral	Ppp1r16b
Stra8	Pnma5	Hopx
Syngr1	Prrt4	Als2
T	Akap5	Smyd1
Tcf15	Zfp267	Plekha6
Phlda1	Clec2l	Nfasc
Tgm3	Susd5	Grm2
Thrsp	Gpr25	Triml2
Thy1	Tmem233	Timd2
Phlda2	Isoc2a	Nxt2
Tst	Calml4	Dctd
Tuba3a	Cnnm2	Islr2
Tuba3b	Alkbh1	Cdc45
Tubb2a	Col6a6	Tgm1
Upk2	Kif19a	Tfeb
Zfy1	Ablim1	Gm15455
Abcg1	Brwd1	Cblc
Apobec2	Lin9	Taf7l2
Aqp5	Gm11545	Mgat4c
Neurog3	Zfp185	Cysltr2
Atox1	Bach2	1700012B07Rik
Atp1b1	Kazn	Fam174b
Klf5	C2cd5	9330159F19Rik
Tspo	Cenpw	Stk32c
Capns1	Bcan	Nsmce4a
Casp14	Cbfa2t3	Syce3
Casp6	Trpc2	Gm3604
Ccnd2	Rnft2	Susd2
Cdx1	Mdfi	Pkp3
Clgn	Apoc1	Rmi2
Cox7a1	Dzip3	Rpl10l
Cyct	Banp	Ccdc138
Dok2	Cdca2	Crybg2
Lefty1	Inpp5d	Megf6
Epas1	Yif1b	Gprasp2
Epha2	Lnpk	Adgre5
Erbb3	Hpn	Tchh
Faah	Zfp945	Elf3
Fabp3	Ttk	Plekhb1
Fcer1g	Zfp426	Otud6a
Il4i1	Zscan4f	Fgfr3
Fos	Dmtf1	Birc7
Gata6	Amy1	Lpar5
Gjb5	Ebf4	Susd1
Gna15	Adam11	Coq8a
Grin2c	Pclo	Atp2a3
Hal	Foxp4	Fignl1
Hbegf	Serac1	4930579F01Rik
Icam2	Zfp661	Pradc1
Klf4	Reps1	Mttp
Lat	Cdc25b	Rhpn1
Anxa1	Ubap1l	Rabggtb
Lrrn2	Wdfy1	Arhgap19
Sik1	Kcnip3	S100a14
Nfkbia	Tlk2	Senp3
Nefl	Arhgef16	Lrrcc1
Nid1	Bub1	Plxdc1
Notch4	Nemp1	Psma8
Pax8	Odf2	Tars2
Pdgfb	Xkr5	Sult6b1
Prkca	Phf8	Satb1
Pros1	Boll	Chn2
Ptgfrn	Fggy	Rpap1
Rbp1	Frrs1	Fbxo27
Rhd	Ltbp4	Dnaaf4
Sema7a	Stat5b	Pde9a
St8sia1	Mtcl1	Tcf19
Kdm5d	Syt3	Wdr90
Srms	Fam189a2	Pabpc6
Sycp3	Eml4	Rpl3l
Tbx3	Nedd4l	Zfp605
Tcea3	Jmjd7	Homer2
Cripto	Mfsd4a	Pias2
Tie1	Fnbp1l	Rerg
Tnfsf12	Lin54	Rpa1
Ucp2	Kmt5c	Phf11c
Lin7b	H2-M5	Ska1
Zfp36	Zbtb44	Erlin1
Creg1	Fcgbp	Cep55
Spry4	Kit	Bcas1
Tlr2	Eps15l1	Mical1
Mapk13	Fyn	Ankrd33b
Sema4g	Lepr	Dpys
Ddx3y	Pla2g5	Akap11
Atp1b2	Ccnc	Rnf165
Abca1	Cdc14b	Ildr2
Grcc10	Eif4a2	Dap3
Hebp1	Fam178b	Pdzk1ip1
Hspb1	Trp73	Egfl7
Atp1a4	Mroh7	Vill
Ly75	Sirt3	Zfp961
Ror2	Ccn6	Zfp809
Pcsk1n	Meioc	Arhgap8
Spag6l	Sec14l5	Trank1
Dkkl1	Tspan32	Dnah6
Dmrt1	Opn4	Zfp229
Aqp3	Tm9sf5	Mpp4
Map3k6	Lpin1	Hspb2
Auh	Hdac6	Bend4
Vamp8	Hpca	Slc52a3
Chst3	Rpl35a	P2rx2
Gipc2	Gfap	Majin
Cldn7	Gpr160	Rgs9
Septin1	Megf11	Nsun6
Bet1l	Nxpe3	Tmem215
Trpm1	Prr23a1	Slc4a5
Sfn	Iho1	Mgll
Sfrp5	Ly6h	Cspg5
Prss16	Cntfr	Ccdc33
Nphs1	Cpne6	Fam122b
Cited4	Dpp6	Spock1
Htra1	Poli	Fmr1nb
Nme4	Rtkn	Spata31d1b
B4galt6	Gcnt1	Gpr19
Acp6	Rbl1	Rad18
Acp3	Tpx2	Wipf3
Dusp14	Zfp937	Nrg2
Dipk1b	Fbrsl1	Col6a5
Chst5	Nemp2	Zyg11a
B3galnt1	Lrrc9	1110032F04Rik
Vsig2	Atat1	Tex11
Tmsb4x	Zfp949	Rmi1
Tesc	Nars	Mtbp
Tnfrsf13b	Tent5c	Ccdc125
Cdc42ep5	Syce1	Sarm1
Rnase4	Fam13c	Kcns3
Pgap6	Insyn2a	Fam114a2
Trpv4	Ppfia4	Tspan8
Ptges	Vwa5b2	Cd163
Arl6ip5	Gm13889	Elmod2
Pmepa1	Btbd18	Rbm20
Arpc1b	Kcnt1	Dtwd2
Atp5mk	Lrrc74b	Bdh2
Slc5a4b	Mak	Senp8
Pycard	Lrp4	Kdm4c
Rab3b	Adtrp	Olfr376
Asz1	Zfp212	Fxyd4
Jam2	Ddx4	Rlbp1
Zfp593	Gse1	Thpo
Tmem79	Cdin1	Cacna2d2
Plekhf1	Pianp	Camk2b
Dppa5a	Zfp691	Map3k9
Stmn2	Tenm3	Klk11
Tmem42	Ttc39a	Mymx
Ndufa3	Ndrg2	Plekhd1
Fbxo36	Dlgap2	Zkscan7
Arl4d	Fam98c	Zfp600
Camk2n1	Als2cl	Eif1ad8
Rmdn1	Mtss1	Slc25a13
1700020L24Rik	Msh5	Eif1ad4
Chmp4c	Cables1	Slc5a6
Ptpmt1	Clcnka	Ect2
Mrpl51	Rbm46	Ablim2
Uqcr11	Eng	Rapgef3
Rdm1	Cacnb1	Otub2
Emc2	Grid2ip	Igsf5
Slc16a9	Gtpbp8	Tfdp2
Tmem107	Casz1	Rhox13
Dmac1	Ube2v2	Zscan4b
2310030G06Rik	Polq	Pfdn6
Smarcd3	Gjc1	Tmem132b
Higd2a	Upp1	Ddc
Agpat2	B3gnt5	Dcaf12l1
Ubxn11	Mcf2l	Ddx19b
Rpp21	Rbp4	Kat2b
Mansc1	Ppm1b	Ndfip2
Mgarp	Esrrb	Dync1i1
Pllp	Tnfsf13	Ddx43
Ooep	Grip2	Tmc8
Tppp3	Macroh2a1	Nek10
Bphl	Qk	Gm3336
Lurap1	Shd	Fsd1l
Rpl39l	Dpp4	Srsf7
4930591A17Rik	Lnx1	Dclk2
C2cd6	Sirt1	Tpbgl
Ggct	Pum1	Arhgap32
Blvra	Lrrc57	Rgs22
Col6a4	Slc44a1	Frem1
Mocos	Prrc2b	Spc25
Lurap1l	Araf	Slc38a3
Hint2	Crybb3	Tex14
Fam216a	Proser2	Cacng5
Tusc1	Ppp1r16b	Zfp94
Vstm5	Rab17	Pnck
Pierce1	Nr5a2	Magec2
Pold4	Als2	1700013H16Rik
Steap1	Ralgps2	Cyp4f14
Eef2kmt	Gjb3	Gm11544
Cpm	Blzf1	Kat6b
Noxred1	Plekha6	Tmem39a
Fsip1	Nfasc	Shisa8
Izumo4	Svip	Fignl2
Ceacam20	Rnf152	Slc37a1
Atp5pd	Ccdc112	Cep57l1
Slc16a14	Gstm4	Zfp981
Lrrc34	Triml2	Zfp383
Tcp11x2	Sh3bp5l	Trim34b
Fam217a	Nxt2	Ggnbp1
Ppm1j	Islr2	Cacna1a
Borcs6	Cdc45	Rpl31
Ift70b	Tgm1	Shmt2
Cenpv	Tfeb	Pan2
Tex19.1	Palm	Mybpc1
Npl	Fmo5	D16Ertd472e
Dmgdh	Cblc	Pou5f1
Gtsf1	Fbxo44	Cmtm7
Ccdc3	Taf7l2	D430019H16Rik
Efhc2	Miga1	Slco2b1
Sohlh2	Mpst	Llgl2
Taf7l	Fzd6	Folr1
Nkx6-3	Parvg	Mllt10
Spsb1	Troap	Cars
Tdrd9	Stk32c	Cdh23
Lmbr1l	Nsmce4a	Slc7a7
Dusp9	Nrip2	Tdrd3
Tm4sf5	Syce3	Enox1
Snx24	Mdm1	Smim22
Iqcd	Susd2	Mtf2
Ly6k	Ccdc90b	Efcab15
Rbmxl2	Pkp3	Echdc2
Fam81a	Nudt17	Zfp850
Prelid2	Rmi2	Hsf4
Shisal2b	Rpl10l	Esp24
Mlana	Hif3a	Scgb1b3
Naa38	Ccdc138	Sun1
Ier5l	Sgsm1	Fsbp
Slc19a3	Crybg2	Rims2
Cpn1	Lrrc51	Usp17le
Tex13b	Megf6	Kcnj12
Nlrp4c	Eml2	Mical3
Cdo1	Tnik	Cbs
Ly6g6d	Ythdc2	Clip4
Amn	Gprasp2	Spag16
Spock2	Adgre5	Slc4a9
Cox6c	Lcorl	Aire
Slc15a1	Ppp1r36	Cdc7
Nat8f2	Cog5	Tktl2
Trim16	Elf3	Tk1
Myo1f	Shisal1	Sema6c
Vmn1r53	Begain	Ada
Smc1b	Plekhb1	Setmar
Cacng6	Otud6a	Kcnip2
Cacng7	Fgfr3	Ahsg
Cacng8	Birc7	Cited1
Ripply3	Zbtb5	Arc
Pycr2	Susd1	Gm867
Arhgap27	Coq8a	Zmat4
Brk1	Pcgf2	Foxn1
Kdelr3	Atp2a3	Gm11238
Acot3	Fignl1	Dazl
Praf2	2700049A03Rik	Fkbp6
Atp12a	Coa8	Tnnt1
Trib1	Mttp	Ecel1
Tmem63a	Hectd2	Lamb3
Klhdc8a	Cyp2d22	Itga6
Ccdc28a	Neurl1a	Snap91
Rab29	Arhgap19	Ube2t
Tmem51	Nr1h4	Dmc1
Shisa2	S100a14	Cryaa
Pim3	Senp3	Mroh2a
Ubtd1	Lrrcc1	Ace
Gca	Prph	Glrb
Rhov	Plxdc1	Rasal1
St8sia6	Psma8	Msh4
Sgcz	Sult6b1	Pcnt
Wipi1	Satb1	Cobl
Cth	Cfap70	Tcf24
Tcp11l2	Chn2	Ildr1
Stac2	Nkd1	Osgepl1
Itpka	Cacna1h	Prc1
Hpdl	Rpap1	Dhx32
Usp9y	Fbxo27	Pdyn
Hus1b	Dnaaf4	Atl2
Zc3h12a	Ush1c	Ssbp1
Dnajb13	Pde9a	Xndc1
Eeig1	Brme1	Camk2a
Mylip	Rab37	Kif14
Acsf2	Wdr90	Atp9a
Eva1b	Cracd	Rad1
Efhb	Ppp1r10	Cd1d2
Dstyk	Tbc1d24	Mme
She	Rpl3l	Sox17
Itpk1	Homer2	Tcl1
Rnd1	Add3	Oard1
Kank4	Ppp6r3	Tfr2
Fry	Pias2	Hormad1
Parp12	Fbxl16	Amph
Kirrel2	Pwwp2a	Sass6
Idh2	Phf11c	Slc25a40
Tph2	Wars	Brd8
Dleu7	Marchf5	Fhod3
Suox	Erlin1	Zfp740
Hmces	Cep55	Clec2i
Rab6b	Mipol1	Mcf2
Mmgt2	Ankrd33b	Nxf2
Rhof	Dpys	Zap70
Bola2	Ablim3	Ccdc63
Sowahb	Klhl29	Nanog
Rassf10	Akap11	Palb2
Mael	Rnf165	Cox6b2
Chchd10	Zfyve27	Zfp998
Ldhal6b	Dap3	Shisa7
Calhm6	Pdzk1ip1	Camk1d
Aard	Egfl7	Ccnc
Leng9	Vill	Abo
A2m	Cdpf1	Atp1a3
Gpr4	Arhgap8	Mid1
Dnajc22	Trappc9	Lrriq4
Fbxo2	Catsperg1	Wdr31
Ubald2	Trank1	Atp4a
Insyn1	Dnah6	C8a
Lefty2	Zfp229	Scml2
Strip2	Mpp4	Cwc22
Tafa4	Hspb2	Tmx2
Kndc1	Robo3	Ppp1r14d
Wscd2	Eomes	Adal
Dmrt3	Bend4	Col17a1
Gpr157	Slc52a3	Cpeb3
Fam167a	P2rx2	Wdr76
Crebl2	Majin	Tekt5
Smtnl2	Rgs9	Pla2g10
Zfp459	Nsun6	Mcm8
Pramel3e	Dcaf17	Foxa2
Mapk15	Slc4a5	Polr2a
Fads6	Arsg	Pfkp
Myo1g	Niban3	Fgf11
Vkorc1	Zfp712	Rbm39
Reep1	Cspg5	Sgk2
Themis	Ccdc33	Pcsk6
C130074G19Rik	6030458C11Rik	Myo18a
Fndc10	Fam122b	Kif7
Slc6a1	4931428F04Rik	Hnf1b
Slc9b2	Spock1	Art5
Tmem179	Vmac	Rad51c
Gprc5a	Dennd1b	Foxred1
Eras	Slc39a11	Kyat3
Mypn	Sec14l1	Nek1
Slfn5	Dynlt1a	Polr3gl
Nkx6-2	Large2	Tuft1
Tma7	Cep95	Car7
Coa4	Spata31d1b	Agtrap
Wfdc15a	Rhbdf2	Caprin2
Mafa	Sirt4	Syt14
Tspan15	Gpr19	Usp1
Bbln	Rad18	Slc7a1
Igsf21	Wipf3	Mpdu1
Vstm2l	Nrg2	Slc7a3
Trim67	Slc8a3	Dlgap3
Stard8	Zyg11a	Cenpa
Slc6a7	1110032F04Rik	Nfe2
Ccdc68	Tex11	Cdc37l1
Cenatac	Mtbp	Mcm5
Dyrk4	Fam83h	Rnf138
Arl5c	Arhgap39	Aldoc
Tmsb15l	R3hdm2	Hus1
Ndufs5-ps	Scara5	Tmem265
Gm7367	Ccdc125	Mlh3
2210409E12Rik	Ncmap	Col13a1
1700018B24Rik	Sarm1	Plekha7
Nphs1os	Kcns3	Dtl
1700108F19Rik	C2cd4c	Mcm10
2900041M22Rik	Fam114a2	Pigo
Trmt61b	Rnf144b	E2f2
Fam120aos	Elmod2	Mad2l2
Tmem51os1	Wdr59	Akna
1700096K18Rik	Rbm20	Cenpi
A230072C01Rik	Ncald	Bckdhb
2210417A02Rik	Wdr33	Ggt1
Snhg8	Dbndd1	Itga3
Mir22hg	Abat	Ints7
Gm10857	Il4i1b	Nadsyn1
1700048O20Rik	Bdh2	Sema4f
Gm41	Lrrc56	Pigbos1
Gm53	Senp8	Gm27021
Gm15915	Dis3l2	Porcn
B230208H11Rik	Thpo	Gpr50
Platr14	Cacna2d2	Lrrc31
Gm15441	Camk2b	Zfp141
Zfp593os	Map3k9	Robo4
Gm19784	Rasgrp4	Gm45929
6330410L21Rik	Klk11	Dpm1
Platr7	Mroh4	Tmem218
Mir124a-1hg	Zfp516	Crocc2
Snhg5	Mymx	Synpo2l
4930461G14Rik	Plekhd1	Ankle1
1700042O10Rik	Zkscan7	Cnpy1
AU040972	Ect2	Zfp423
Bcor	Slc45a3	Fam126b
5930403L14Rik	Grb10	Pmf1
4930444M15Rik	Grin1	Gata4
C330022C24Rik	Ablim2	Zfp606
4930506C21Rik	Tsc22d1	Gm21761
Gm6083	Rgs20	Pmvk
Dgkeos	Afap1l2	Igfbp2
Gm38509	Rapgef3	Usp37
C230014O12Rik	Otub2	Lrcol1
2400006E01Rik	Phka2	Cabp1
4930512J16Rik	Rpgr	Gpr83
Rbfaos	Zmym3	Siglech
Etaa1os	Prdm16	B3gat1
Gm45928	Tfdp2	Glb1l2
1110002J07Rik	Rhox13	Marchf11
Dancr	Psrc1	Ing3
2310043M15Rik	Tmem132b	Celf6
Gm13016	Kcng2	Tmem209
Gm15743	Caly	Khdc3
Gng5-ps	Bend7	Mkrn1
Gas5	Ddah2	Tpk1
Gm32885	Dcaf12l1	Elovl2
Gm41259	Ddx19b	Unc5a
Gm20544	Dnajc1	1700037H04Rik
B230217C12Rik	Kat2b	Bmf
Platr3	Kif17	Kcnn2
Platr27	Ndfip2	Hnf4a
Tbx3os1	Ddx43	Cux2
Gm46901	Lysmd4	Mcm6
Gm27204	Cldn7	Lta4h
Tnfsf13os	Dlc1	Asgr2
Gm41609	Acp4	Cd79b
Gm33531	Tmc8	Krt13
Grin1os	Cfap73	Aldh6a1
Gm20684	Foxl3	Ppp1r1b
A730049H05Rik	Gm3336	Dmd
	Gfy	Etv4
	Kifc1	C8b
	Srsf7	2810408A11Rik
	Dclk2	Rnf167
	Arhgap32	Mrpl2
	Gm5901	H2az1
	Rgs22	Fbrsl1
	Map7	Prss36
	Aatk	Mmp28
	Ccpg1os	Klk1
	Adgrg1	Setdb2
	Gm7694	Gm45935
	Itsn2	Klk8
	Tcof1	6720489N17Rik
	Spc25	Sycp2l
	Ascc1	Slc6a16
	Slc38a3	Zfp990
	Sptbn4	Tipin
	Tex14	Adamts8
	Cacng5	Suclg2
	Pnck	Zfp354a
	Vps37d	Clgn
	Adgrb2	Habp2
	Topaz1	Cradd
	Zfp839	Tra2b
	Tac2	Smim8
	Msi2	Zfand1
	Kcnj11	Abhd6
	Reep2	Alox12
	Reep6	B230311B06Rik
	Scarb1	Fam111a
	Cyb5r2	Zfp33b
	Nrxn2	Col26a1
	Kat6b	Pyy
	Tmem39a	Cyp11a1
	Psat1	H2az2
	Papln	Acot11
	Shisa8	S100pbp
	Fignl2	Nipal3
	Rnf223	Rpl22l1
	Fam160a2	Zfp654
	Ncoa6	Vwa7
	Cep57l1	Jakmip1
	Gm11837	Abcc10
	Zfp383	Dcbld1
	Trim34b	Oas2
	Zkscan8	Rad51ap1
	Ggnbp1	Akap7
	Cacna1a	Lama3
	Gga3	Tmtc1
	Greb1	Lmntd2
	Cadps2	Fbxl3
	Shmt2	Urah
	Pan2	Ybx2
	Syt1	Mylpf
	Rundc3a	Pycr1
	Pou5f1	Ankrd49
	Cyfip2	Trpa1
	Cmtm7	Ddx11
	Inca1	Smim27
	Osbpl1a	Ptprd
	D430019H16Rik	Eif1ad16
	Ehbp1	Map4k1
	Hfm1	Sigirr
	Zfp82	Ckmt1
	Llgl2	Eri2
	Gstz1	Cyb5r1
	Mllt10	Plcb4
	Rad51b	Nuf2
	Sulf2	Scn3a
	Cars	Bcar3
	Cdh23	Rps28
	Dmtn	Zkscan16
	Smc5	Rif1
	Kcnma1	Polr1h
	Serinc2	Pdss1
	Elmod3	Epb41l4b
	Tdrd3	Extl1
	Smim22	Mindy3
	Racgap1	Dph7
	Tmem52	Dscc1
	Tet1	9930104L06Rik
	Scn5a	Casq2
	Mtf2	Klf15
	Sez6l	Syt2
	Efcab15	Nphp4
	Zfp850	Myl4
	Ubox5	Tmeff1
	Hsf4	Ssr2
	Rslcan18	Coq3
	Mib2	Map2k6
	Sun1	Btf3l4
	Fsbp	Cyb561
	BC107364	Fam205c
	Rims2	Aldh1l1
	Epha10	Kcnc4
	9030624G23Rik	Ndufaf1
	Usp17le	Kyat1
	Kcnj12	Dusp12
	Dpf3	Apmap
	Eef2k	Pecr
	Zdbf2	Ift52
	Mical3	Pramel6
	Gm19345	Prkaa2
	Bin2	Amhr2
	Cbs	Mcm7
	Ephx2	Crtac1
	Enox2	Ube2d3
	Gabpb1	Smc4
	Scube1	Uba1y
	Clip4	Eif2s3y
	Spag16	Mettl4
	Myh14	Kank3
	Slc4a9	Klf8
	Aire	Herpud1
	Cdc7	Kcng4
	Sec1	Nutf2
	Rpl37rt	1700018B08Rik
	Sort1	Sorl1
	Socs1	Carmil2
	Gja3	Dbt
	C8g	Exoc3l
	Ano7	Cggbp1
	Eya2	Cpne4
	Sema6c	Pm20d1
	Tle5	Mei4
	Epc1	Rbbp5
	Setmar	Zbtb7c
	Kcnip2	Xrcc5
	Ahsg	Tmem266
	Arc	Rpl10a
	Fer1l5	Olfm2
	Gm867	Sgsm3
	Zmat4	Tdrkh
	Grip1	Mpzl2
	Dazl	Tnfrsf13c
	Fkbp6	6030458C11Rik
	Tnnt1	Gng13
	Ecel1	Spats1
	Lamb3	Gm973
	Sh3gl3	Gm1070
	Itga6	Ppcdc
	Snap91	Wscd1
	Ube2t	Lysmd4
	Dmc1	Gm38396
	Cryaa	Aars2
	Mroh2a	Wdr47
	Ace	Slc9b1
	Glrb	Fam241b
	Rasal1	Shld1
	Cnga3	4930519F16Rik
	Msh4	Vpreb3
	Deaf1	Usp17lb
	Tjp3	Usp11
	Pcnt	Slc25a15
	Cobl	Gabra1
	Tmem201	Tmem29
	Tcf24	Hap1
	Carf	Coprs
	Tbx1	Slc2a4
	Ildr1	Csad
	Wnt11	Rtkn2
	B4galt4	Fam229b
	Grk3	Tmem108
	Osgepl1	Actr6
	Zmym6	Mtus2
	Dapk1	Zfp454
	Zranb3	Pitpnc1
	Prc1	Mettl25
	Unk	8030474K03Rik
	Tubgcp2	Ccdc38
	Dhx32	Adgrb1
	Ghrl	Lcorl
	Elf1	Zc3h13
	Pdyn	Elapor2
	Atl2	Sh3tc1
	Xndc1	Rpl15
	Pacsin1	Paqr3
	Camk2a	Oasl1
	Sct	Ccdc60
	Alpl	Dis3
	Kif14	Ap5m1
	Atf4	Shld2
	Crhr2	Zfp959
	Atp9a	Morc2b
	Mme	Cpne5
	Sox17	Bbs9
	Tcl1	Dclre1a
	Tfr2	Morn2
	Hormad1	Ocln
	Amph	Rps24
	Sass6	Tmtc4
	Spata7	Ipo5
	Chfr	Rcbtb1
	Psd2	Elobl
	Tfcp2	Msc
	Brd8	Rnf2
	Zap70	Zfp184
	Btn2a2	Zfp553
	Mynn	Gpa33
	Fhod3	Arhgap26
	Arhgap33	Pfn4
	Mcf2	Itgae
	6820408C15Rik	Acan
	Mturn	Tdrp
	Rnf32	Slain1
	Rufy3	Tmem63c
	Poln	Plcd3
	Ccdc63	Tmem161b
	Nanog	Pold2
	Cox6b2	Gstp3
	Per3	Fam234b
	Csnk1e	Zfp977
	Zfp189	Abtb1
	Pld6	Gm5165
	Shisa7	Atad2b
	Ism2	Sncb
	Wnk2	Plaat3
	Slc26a8	Gm550
	Mybl1	Ubtf
	Snapc4	Knl1
	Usp45	Slc34a3
	Atp1a3	Duox2
	Tmem91	Acot8
	Ttc14	Dgke
	Zer1	Ranbp17
	Mid1	Uqcr10
	Dolpp1	Rnf212
	Lrriq4	Itgb3bp
	Plp1	Pla2g4e
	Ralgps1	Odad4
	Atp4a	Ppp1r9a
	Gapdhs	Igsf23
	Cntrl	Zfp286
	Scml2	Odad1
	Scn9a	Piwil2
	Kcnc3	Rab44
	Becn2	Igfals
	Foxj3	Lims2
	Ephb2	Fbxo15
	Ppp1r14d	1700019D03Rik
	Adal	Nudt12
	Col17a1	Zfp958
	Cpeb3	Polr1has
	Clstn1	Osr2
	Tekt5	Rbm26
	Usp43	1700019N19Rik
	Mcm8	Ccnt1
	Polr2a	Pax2
	Aifm3	Arhgef38
	Pfkp	Piwil4
	Dpf2	Prdm11
	Fgf11	Grtp1
	Rbm39	Dab1
	Dhx35	Meiosin
	Emilin3	Tle7
	Rph3al	Shoc1
	Apba2	Gm38999
	Pcsk6	Gm36210
	Pcmtd2	Lsmem2
	Myo18a	Dnah12
	Kif7	Rnf212b
	Sez6	Gm36718
	Hnf1b	Ankrd31
	Misp3	Vinac1
	Art5	Ppp1ccb
	Dido1	Emid1
	Rad51c	Ly6g6d
	Adcy9	Gm21818
	Nek1	Pzp
	Polr3gl	Abca4
	Tuft1	Chrna7
	Rorc	Acvr1b
	Kcnh2	Gpr182
	Cmc4	Parp1
	Ngb	Adrb1
	Car7	Nr0b1
	Kctd19	Alppl2
	Capn5	Aplp1
	Gab1	Atf1
	Caprin2	Bard1
	Syt14	Hrk
	Tspan33	Bmp6
	Usp1	Capn3
	Slc7a1	Ccnb2
	E4f1	Ccnf
	Azin2	Cd3e
	Dlgap3	Cdk1
	Cenpa	Chek1
	Aktip	Chga
	Cdc37l1	Ovgp1
	Gzmm	Cidea
	Mdm4	Cit
	Qsox2	Cplx1
	Aldoc	Cry1
	Hus1	Cycs
	Stil	Dcc
	Col13a1	Dhh
	Plekha7	Dffb
	Ccna1	Dsg2
	Dtl	Usp17la
	Pigo	Cela2a
	E2f2	Epha4
	Mad2l2	F2rl1
	Pank4	Fbp2
	Apoe	Fdx1
	Ggt1	Fdxr
	Itga3	Fgf3
	Mmp11	Fgfr4
	Trim68	Fzd4
	Hhipl2	G0s2
	Nadsyn1	Gabpa
	Stat4	B4galnt2
	Zfp51	Gc
	Sema4f	Gcnt2
	Aldh2	Gja4
	Porcn	Gpr27
	Gpr50	Guca1a
	Lrrc31	H2-Bl
	Gm45929	H2-Oa
	Dpm1	Hcn2
	Tmem218	Hdac2
	Synpo2l	Hdc
	Mei1	Hells
	Ank1	Foxq1
	Pde4c	Foxa1
	Asic3	Hsd17b2
	Asb10	Ipp
	Bend6	Kcnb1
	Ankle1	Kcnu1
	Osbpl7	Napsa
	Cnpy1	Kif4
	Zfp423	Lama1
	Ankrd23	Lrrn1
	Ankrd39	Ltk
	Scrib	Mcm3
	Paqr6	Mcm2
	Fam126b	Mcm4
	Lgi2	Mesp2
	Pmf1	Mfng
	Gata4	Mras
	Rassf6	Msh2
	Igfbp2	Mthfd2
	Usp37	Mmut
	Caps2	Mybl2
	Lrcol1	Mybpc3
	Cabp1	Klk1b3
	Cnksr2	Nid2
	Gemin8	Nos1
	Rnf220	Nos3
	Tenm4	Npr1
	Tex26	Ntrk3
	B3gat1	P2rx1
	Glb1l2	Pdha2
	Marchf11	Padi2
	Dixdc1	Pfkfb1
	Lingo1	Prkci
	Celf6	Pla2g2c
	Tmem209	Pola1
	Elovl2	Prim1
	Celf5	Prim2
	Unc5a	Psmc3ip
	Xrn1	Pipox
	Bmf	Ptpn20
	Kcnn2	Pura
	Hnf4a	Rad51b
	Cux2	Rfx2
	Apool	Rpl12
	Cdk5rap2	Polr2c
	Actg1	Rrm2
	Asgr2	Ryr1
	Cd79b	Stmn3
	Krt19	Slc1a1
	Aldh6a1	Slc1a5
	Ppp1r1b	Sox1
	Dmd	Serpina3m
	Etv4	Sephs2
	Pctp	Stra8
	C8b	Syngr1
	2810408A11Rik	Tacr2
	Nudt14	Hnf1a
	Rnf167	Tcf15
	Qpct	Tfam
	Rasgef1a	Tgm3
	Prss36	Tlx2
	Mmp28	Tnfrsf8
	Setdb2	Pglyrp1
	Gm45935	Tst
	Klk8	Tsx
	Sntg2	Tuba3a
	Slc6a16	Tuba3b
	Adamts8	Slc32a1
	Suclg2	Vil1
	Zfp354a	Wnt6
	Hspa12a	Zfp101
	Clgn	Zfp42
	Gdf15	Zic3
	Zfand1	Zik1
	Alox12	Slc30a1
	Rnf181	Adcy1
	Trappc6a	Parp2
	Zfp33b	Alox12b
	Col26a1	Apob
	Ccdc28a	Apobec2
	Pyy	Atp1b1
	Cyp11a1	Bche
	H2az2	Bmp15
	Slc4a8	Klf5
	Krba1	Bub1b
	Ipmk	Aspm
	S100pbp	Casq1
	Pcbp3	Ccna2
	Nipal3	Cdc25c
	Rpl22l1	Cdh4
	Usp48	Cdh5
	Spen	Cdk5r2
	Zfp654	Cdx1
	Rundc3b	Celsr1
	Slc30a3	Cga
	Jakmip1	Col15a1
	Ulk1	Cox7a1
	Abcc10	Cpt1b
	Mmab	Cyct
	Crb3	Dapk2
	Dcbld1	Dkk1
	Med13l	Usp17lc
	Ndufb8	S1pr4
	Oas2	Edn1
	Rad51ap1	Epas1
	Akap7	Ephb3
	Nt5dc1	Erf
	Tmtc1	F2
	Slc8a2	Faah
	Lmntd2	Fgf1
	Fbxl3	Fgf4
	Bahcc1	Fhl4
	Lmo7	Fkbp5
	Ybx2	Gast
	Atxn2l	Gata6
	Ksr1	Gjb5
	Pycr1	Haspin
	Ptprd	H1f6
	Yjefn3	H2-Q10
	Gm10509	Hal
	Map4k1	Hesx1
	Sigirr	Foxd3
	Ckmt1	H2ax
	Eri2	Hoxc13
	Paqr8	Elavl3
	Cyb5r1	Ihh
	Plcb4	Inhbc
	Nuf2	Kcnab3
	Slc6a9	Kif11
	Garnl3	Kif15
	Strbp	Klf12
	Bcar3	Lamc1
	Rif1	Lat
	Ccnl1	Lgals4
	Epb41l4b	Lgals6
	Extl1	Phyh
	Rps21	Muc13
	Naga	Matn3
	Top1mt	Mbd4
	Klf15	Mgat3
	Ddx5	Mog
	Syt2	Morc1
	Spidr	Neb
	Nphp4	Nfatc2ip
	Myl4	Notch4
	Tmeff1	Otx1
	Ptk6	Pax8
	Ssr2	Padi3
	Mpp2	Padi4
	Coq3	Abcb1a
	Cyb561	Piga
	Dennd2c	Pnliprp2
	Slc2a8	Pole
	Sec61a2	Pole2
	Aldh1l1	Pou2f3
	Oscp1	Pou4f1
	Kcnc4	Prkdc
	Susd4	Pygm
	Kyat1	Rad51
	Dennd4b	Rps12
	Optn	Rps6ka2
	Ift52	Shcbp1
	Agbl2	St6galnac3
	Prkaa2	Slc2a3
	Amhr2	Slc34a2
	Crtac1	Slc4a1
	Taf6	Slc7a5
	Slc25a28	Smr3a
	Ppp6r2	Sncg
	Smc4	Sox7
	Eif2s3y	Star
	Dop1b	Stc2
	Slc25a27	Plk4
	Mettl4	Eif1
	Flywch2	Sycp1
	Kank3	Sycp3
	Klf8	Tbx3
	Adat1	Tdgf1
	Herpud1	Tie1
	Kcng4	Trim28
	Cfap97	Top2a
	Dusp26	Trap1a
	Nutf2	Plscr1
	Spata6	Xntrpc
	Zdhhc2	Zrsr1
	1700030J22Rik	Ugt8a
	Igdcc3	Zan
	Sorl1	Zfp59
	Arih2	Zfp97
	Spc24	Ikzf3
	Carmil2	Adam23
	Dbt	Impdh2
	Adhfe1	Mmp17
	Tmem44	Nt5e
	Cggbp1	Spry2
	P4htm	Spry4
	Mei4	Clcn6
	Pm20d1	Gnpda1
	Rbbp5	Orc5
	Csnk1a1	Rpl27a
	Zbtb7c	Sema4g
	Tbc1d8	Dpysl4
	Pif1	Asns
	Abcc8	Atp1b2
	Rpl10a	Clu
	Olfm2	Epb41l4a
	Gpatch2	Cdca3
	Cryz	H2-Ke6
	Zfp40	Hebp1
	Tdrkh	Hmmr
	Map3k4	Hspb1
	Mpzl2	Itgb7
	Tnfrsf13c	Madcam1
	Catsperd	Nodal
	Gm1070	Sema5b
	Kdm4b	Sptb
	Lrrc75a	Ttr
	Wscd1	Podxl
	Gm38396	Dbf4
	Gm7072	Plek2
	Aars2	Nufip1
	Slc9b1	Clnk
	Slc38a4	Mmel1
	Armh4	Abcc2
	Fam241b	Dnah8
	Fam161b	Baz1a
	Cfap300	Ly75
	Brd8dc	Sfrp1
	Vpreb3	Hunk
	Ndufb11	Dkkl1
	Elfn2	Icosl
	Madcam1	Sntb1
	Septin3	Crym
	Gnaz	Il27ra
	Zfp14	Sfrp4
	Usp11	Aqp3
	Hap1	Uchl3
	Slc2a4	Rpl13
	Csad	Nptx2
	Cars2	Chst3
	Svop	Rbm3
	Mlxipl	Acrbp
	Scml4	Acsm3
	Rev1	Spint1
	Afg1l	Fanca
	Rtkn2	Stag3
	Tpd52l1	Rpl5
	Fam229b	Septin1
	Tmem108	Clca1
	Zbtb49	Nme6
	Mtus2	Wbp4
	Rbm5	Sfrp5
	Pitpnc1	Syt7
	8030474K03Rik	Nup210
	Lrp11	Apom
	Adgrb1	Ift20
	Hscb	Slc1a4
	Hps4	Mia
	Nudt13	Fbp1
	Zc3h13	Prx
	Elapor2	Ncapg
	Galnt11	Gabbr1
	Slc7a4	Ramp2
	Zfp445	Fmn2
	Oasl1	Nphs1
	Sfswap	Ppie
	Hnrnpa3	Tamalin
	Zfp512	Dnah10
	Ppp2r2c	Cited4
	Ccdc60	Htra1
	Cdkn3	Plce1
	Dis3	Cbln1
	Ap5m1	Rpl21
	Shld2	Diaph3
	Frmd5	Aldh18a1
	Zfp959	Clcnkb
	Cpne5	Slc2a5
	Bbs9	Cpb2
	Rabggta	Acp6
	Rec8	Slc5a1
	Dzip1	Acss2
	Dclre1a	Atr
	Morn2	Papolb
	Zfp235	Chst5
	Caskin1	Tex101
	Zfp799	Fgf21
	H2-DMa	Rfc2
	Ocln	Scube2
	Cab39l	Bcam
	Tmtc4	Vsig2
	Ipo5	Sult5a1
	Rcbtb1	Xrcc2
	Rplp2	As3mt
	Zfp788	Zc3h8
	Slc12a7	Nrip3
	Chmp2a	Fam3b
	Ccp110	Piwil1
	Rprd1a	Glp1r
	Msc	Snrpa1
	Rnf2	Tesc
	Zfp184	Rhbg
	Kif27	Tacr3
	Zfp553	Vstm2b
	Gpa33	Zbtb32
	Mapk4	Nectin1
	Phf10	Gpr180
	Arhgap26	Pga5
	Gm18905	Tulp1
	Gm15246	Nrip2
	Acan	Donson
	4933427D14Rik	Cenpk
	Tdrp	Eed
	Slain1	Cenph
	Dmac2l	Syt9
	Tmem63c	Niban1
	Plcd3	Nrgn
	Pdk2	Sv2a
	Pold2	Slc13a2
	Gstp3	Myl7
	Fam234b	Bhmt2
	Zfp977	Lpar3
	Tarm1	Pkmyt1
	Abtb1	Eefsec
	Gm5165	Pbk
	Atad2b	Slc5a4b
	Tert	Ndc80
	Otop2	Pla2g12b
	Sncb	Slc44a4
	Klhl3	Gtf2a1l
	Plaat3	Riox1
	Gm550	Capn9
	Pigt	Abcb6
	Knl1	Tfcp2l1
	Slc34a3	Paqr4
	Dgke	Jam2
	Ranbp17	Ryr2
	Rnf212	Cep70
	Hmx1	Sapcd1
	Odad4	Rps23
	Lyrm7	Nop56
	Sfi1	Mfn1
	Pdgfa	Ankrd22
	Ppp4r3b	Tomm20
	Rnf43	Kif23
	Hmgb2	1700016D06Rik
	Sepsecs	Popdc3
	Ppp1r9a	Ky
	Clpb	Lap3
	Zfp286	Tsnaxip1
	Odad1	Pcbd1
	Piwil2	Dppa5a
	Mlycd	Natd1
	Acyp1	Tspan13
	Phkb	Ska2
	Colgalt1	Dnajc15
	Ppp1r3b	Arl4d
	Pts	Uqcrc1
	Zfp420	Them5
	Plagl1	Serpinb1a
	Rab44	Llph
	Mlc1	Ing5
	Gnmt	1700020L24Rik
	Igfals	Ndufb11b
	Polh	Tsfm
	Ppargc1b	Mcts2
	Lims2	Lgals2
	Tctn3	Rdm1
	Glce	Gemin2
	Dtx3	Ribc1
	Tmem59l	Tex12
	Pex11g	Rbm4b
	Nudt12	Spesp1
	Polr1has	Klhl10
	Katnal2	Adat2
	Osr2	Tmem170
	Coro6	Plbd1
	Rbm26	Naa16
	H2-Q2	Tmem107
	Pax2	Dsn1
	Arhgef38	Trim59
	Arhgef4	2310030G06Rik
	Dlec1	Swsap1
	Piwil4	Pole4
	Prdm11	Smarcd3
	Grtp1	Timm21
	Dab1	Pgc
	Pnisr	Mastl
	Tle7	Ccdc77
	Shoc1	Eif2s2
	Gm38999	Obi1
	Gm36210	Gemin6
	Rnf212b	Cers4
	Hmcn2	Dipk1a
	Gm13420	Bbs2
	Ankrd31	Soga3
	Sptbn5	Poc5
	Emid1	Gpalpp1
	Trpv3	Slc47a1
	Ly6g6d	Patl2
	Sall1	Bend5
	Pzp	Tm7sf3
	Abca4	Elob
	Acads	Dgat2
	Chrna7	Pllp
	Acvr1b	Poldip2
	Gpr182	Knstrn
	Adrb1	Cmc1
	Nr0b1	Abca14
	Alppl2	Sugt1
	Aplp1	Zcchc10
	Aqp7	Ooep
	Atp2a1	Tppp3
	Atp7b	Mphosph10
	Bard1	Zwilch
	Barx1	Chd1l
	Hrk	Mrnip
	Bik	Cdca8
	Bmp6	Etaa1
	Bmp7	Rpl39l
	Bsn	4930591A17Rik
	Car5a	Mcrip2
	Cckbr	Mto1
	Ccnb2	Gabarapl2
	Ccnf	9530077C05Rik
	Cd3e	Col6a4
	Cd79a	Fitm1
	Cd9	Hddc3
	Cdk1	Gtf2f2
	Chek1	Ubac2
	Chkb	Atp2c2
	Ovgp1	Chac1
	Cidea	Gins1
	Cit	Dcps
	Clcn3	1700001L19Rik
	Col9a2	Cfap206
	Cplx1	C8g
	Cry1	Clic3
	Dhh	Ndufaf5
	Dffb	Hddc2
	Dlx4	Smyd3
	Drd4	Dph5
	Dsg2	Scrn1
	Eif4ebp1	Manba
	Eln	Ly6g6e
	Epha4	Spdl1
	Epha8	Polr3b
	Ptprv	Wdr77
	Esx1	Tmem144
	Faf1	Cep192
	Fbp2	Wdr20rt
	Fdx1	Tex19.2
	Fdxr	Cabs1
	Fgf3	Septin12
	Fgfr4	Zranb3
	Foxm1	Tex52
	Dtx1	Fbxo24
	G0s2	Dmrtc2
	B4galnt2	Noxred1
	Gcgr	Ccdc191
	Gcnt2	Ggt6
	Gdf9	Mcm9
	Gja4	Ceacam20
	Gpr27	Smug1
	Grid1	Amdhd1
	Grin2d	1300017J02Rik
	Gspt2	Mtfr2
	Gstm6	Lrrc34
	Guca1a	Tcp11x2
	H1f0	Dpep3
	H2-Bl	Fam217a
	H2-Oa	Cfap45
	H3f3b	Ppm1j
	Hcn2	Haus5
	Hcn3	Dus4l
	Foxj1	Tube1
	Foxd1	Prr23a3
	Mst1	Acad10
	Foxa1	Slc39a4
	Foxa3	Anks4b
	Onecut1	Gcnt3
	Hpgd	Cracdl
	Hspg2	Zbtb46
	Inhbb	Cenpn
	Ipp	Thumpd2
	Kcnb1	Spata31d1a
	Kcnj4	2200002D01Rik
	Kcnu1	Sgo1
	Kcnq1	Rab38
	Napsa	Pdia5
	Kif4	Skida1
	Klf3	Zfp518a
	Krt4	Ndc1
	Lag3	Zfp493
	Lama1	Cenpv
	Lamc2	Tm7sf2
	Lrp5	Zfp763
	Lrrn1	1700094D03Rik
	Ltk	Rec114
	Epcam	Tex19.1
	Mesp2	Ndufaf7
	Cxcl9	Dppa2
	Mmp15	Haus7
	Mras	Fcho1
	Msi1	Nphp3
	Mthfd2	Paqr5
	Mybl2	Npl
	Mybpc3	Dmgdh
	Nid2	Cyp2s1
	Nkx2-5	Gtsf1
	Nlk	Ccdc3
	Nos1	Mterf2
	Nos3	Lrrc2
	Npas2	Mei1
	Npr1	Myo18b
	Ntrk3	Hsf2bp
	P2rx1	Scara5
	Pde8a	Terb2
	Padi2	Efhc2
	Pdx1	Cfap20dc
	Pfkfb1	Sohlh2
	Pla2g2c	Taf7l
	Phox2a	Cep72
	Pola1	Stpg3
	Ppl	Pck2
	Ptpn20	Elovl7
	Rfx2	Nkx6-3
	Rpl12	Tmem81
	Rpl28	Drc3
	Ryr1	Tdrd9
	Stmn3	Wbp2nl
	Selenbp1	Kbtbd11
	Slc1a1	Parpbp
	Slc1a5	Mettl5
	Sox1	Tti1
	Sox15	Pibf1
	Stra8	Dusp9
	Syngr1	Tm4sf5
	Tacr2	Iqcd
	Hnf1a	Adad2
	Tex9	Cdyl2
	Tgm2	4930447C04Rik
	Thrsp	Wdr64
	Tlx2	Hormad2
	Tnni3	Tcam1
	Tuba3a	0610040J01Rik
	Tuba3b	Clybl
	Ucp1	Atp11b
	Vdr	Tgds
	Slc32a1	Pcolce2
	Vil1	Ly6k
	Wnt10a	Fahd2a
	Wnt3a	Plet1
	Wnt6	Tmem101
	Zfp101	2410137M14Rik
	Trim25	Rpl18a
	Zfp42	Nubpl
	Zfp61	Hyls1
	Zic3	Fam81a
	Zik1	Mettl15
	Chrnb2	Rnf225
	Adcy1	Arxes2
	Parp2	Ticrr
	Adra2b	Tstd3
	Alox12b	Gabpb2
	Apoa1	9430038I01Rik
	Apob	C330018D20Rik
	Apobec2	Stk31
	Aqp5	Spns3
	Atp1b1	Prelid2
	Akr1b7	Pramel13
	Cep131	Abcb5
	Glb1	Pmch
	Chic1	Ulbp1
	Klf5	Shisal2b
	Aspm	Pigh
	Casp14	Ccdc150
	Ccnk	Dnajc21
	Entpd2	Snrnp25
	Cdc25c	Acsbg3
	Cdh4	Efcab11
	Cdk5r2	Ak7
	Cdkn1b	Gins3
	Cdx1	Tspyl4
	Cebpg	Misp
	Celsr1	Spz1
	Clcn2	Slc19a3
	Ccr4	H1f1
	Col15a1	Gpx2
	Col9a3	Cpn1
	Cox7a1	Klb
	Cpt1b	Mov10l1
	Ptgdr2	Bglap3
	Cyct	Tex15
	Cyp46a1	Pramel1
	Des	Tktl1
	Dlx3	Tex13b
	S1pr4	Usp26
	Edn1	Cnnm1
	Efna3	Cenpq
	En2	D1Pas1
	Epas1	M1ap
	Epha2	Ngfr
	Ephb3	Peli2
	Khdrbs3	Amn
	F2	Uchl4
	Faah	Lmx1a
	Fabp3	Spock2
	Fah	Cox6c
	Fgf4	Slc15a1
	Fzd9	Tcf23
	Gpd1	Cox4i2
	Gjb5	Nat8f2
	Gli1	Immp2l
	Gp1ba	Magee2
	Grin2c	1700102P08Rik
	Haspin	Vmn1r53
	H2-Q10	Impa2
	Hal	Hnrnpa3
	Foxd3	Alpk3
	H2ax	Pnpla3
	Hoxc13	Tgs1
	Hrc	Necab2
	Hsd17b1	Rdh1
	Elavl3	Muc4
	Itga2b	Atp6v0a4
	Jag2	Smc1b
	Kcna7	Tm9sf2
	Kcnab3	Acss1
	Kcnh3	Wdr5
	Kcnk3	Elovl6
	Kif11	Gpha2
	Kif15	Cyp4f13
	Klf12	Nxf7
	Klf4	Rtn4ip1
	Lamc1	Parvb
	Lat	Cacng6
	Lbx1	Rogdi
	Lgals4	Zfp704
	Lgals6	Pdzd3
	Lhx3	Ripply3
	Phyh	Gsx2
	Matn1	Ppp1r14c
	Matn3	Osgep
	Mgat3	Qprt
	Bhlha15	Btbd10
	Mog	Klk10
	Sik1	Metrn
	Ncoa1	Ube2s
	Neb	Hrh3
	Nfatc2ip	Psph
	Nfe2l3	Acacb
	Nfyb	Itfg2
	Notch4	Pot1a
	Otx1	Nlrp6
	Oxt	Trf
	Pax8	Rpp25
	Padi3	Hemk1
	Padi4	Upb1
	Phkg1	Fig4
	Piga	Pnpo
	Pole2	Slf1
	Pou2f3	Kdelr3
	Pou4f1	Nrm
	Ppef2	Abhd3
	Prkdc	Yars
	St14	Atp12a
	Prtn3	Slc25a36
	Ptprn2	Pou4f2
	Pygm	Clca3b
	Rev3l	Ece2
	Rps18	Kif18a
	Rps6ka2	Mllt6
	Scnn1a	Slc6a13
	Srsf2	Angel1
	St6galnac3	Cep85
	St8sia1	Cdkal1
	Slc2a3	Spice1
	Slc4a1	Dlgap5
	Slc7a5	Hdhd5
	Snrpc	Ncaph
	Sox10	Eppk1
	Sox2	Ppp2r5a
	Sox7	Bpifb5
	Star	Gatb
	Stc2	Rad9b
	Eif1	Tmem45b
	Sycp1	H3c8
	Sycp3	Zfp979
	Tbx3	Pomt1
	Tbx6	Creb3l3
	Tdgf1	Lactb2
	Tie1	Slc44a3
	Top2a	Chtf18
	Ppp1r13b	Hkdc1
	Traip	Ubxn2a
	Trap1a	Oxnad1
	Xntrpc	Haus4
	Tnfrsf4	Shisa2
	Zrsr1	Ggact
	Lin7b	Pim3
	Vipr1	Rfc4
	Vwf	Gca
	Zan	Rhov
	Mkrn3	Ccm2l
	Zfp59	9430015G10Rik
	Ikzf3	Tmprss11d
	Adam23	Thumpd1
	Aloxe3	Cngb1
	Lamc3	Ice2
	Mmp17	Nup43
	Nt5e	Obox6
	Tenm1	Lctl
	Spry4	St8sia6
	Vax2	Rell1
	Clcn6	Fntb
	Gnpda1	Slc51a
	Map3k1	Fanci
	Mok	Cth
	Sema4g	Mtrf1
	Dpysl4	Ell3
	Figla	Tmem82
	Pla2g2e	Krt79
	Asns	Soat2
	Atp1b2	Tfb1m
	Btn1a1	Hibch
	Clu	Itpka
	Cpt1a	Sord
	Epb41l4a	Fam151a
	Cdca3	Paip2b
	H2-Ke6	Slc5a11
	Hebp1	Neil3
	H3c1	Prss50
	Hmmr	Zfp825
	Hspb1	Mettl22
	Itgb7	Slc29a4
	Muc1	Olfr985
	Mx2	Foxn4
	Nodal	Ly6g5b
	Ppp1cc	Serpinb6c
	Sema5b	Chrnb4
	Sptb	Ly6g5c
	Plek2	E2f4
	Nufip1	Asb16
	Pald1	Osbpl10
	Mmel1	Cdc5l
	Abcc2	Unc5cl
	Dnah8	Zfp472
	Ly75	Hus1b
	Sfrp1	Rtp3
	Hdgfl3	Zfp352
	Meltf	Padi6
	Hey2	Cadm4
	Fbxl6	Mmrn2
	Zfp354c	Atp10d
	Chrna4	Csrnp2
	Galnt3	Dock3
	Gbx1	Trpm6
	Slit1	Rhobtb2
	Dkkl1	Tcstv3
	Icosl	Dnajb13
	Dmrt1	Pms1
	Crym	Prkag3
	Il27ra	Acap1
	Clasrp	Acsf2
	Zscan12	Rps15a
	Comp	Scgb3a1
	Aqp3	Cntf
	Prkn	Dio3
	Auh	Ccnb1
	Neu3	Zfp536
	Uchl3	2810021J22Rik
	Chst3	Abraxas1
	Rbm3	Clic6
	Irf6	Tmc7
	Ppp1r3c	Slc38a5
	Fkbp1b	Efhb
	Acsm3	A730008H23Rik
	Spint1	She
	Fanca	Aldh5a1
	Hmgn2	Ybey
	Stag3	Papolg
	Phgdh	Cntrob
	Olig1	Tada2a
	Rpl5	Mis18bp1
	Spag5	Itpk1
	Septin1	Mier3
	Zfp316	Arl15
	Akap8l	Clic5
	Rpl36	Sh3tc2
	Golga4	Dars2
	Wbp4	Adap1
	Sfrp5	Fgd5
	Syt7	Elmo3
	Hs3st3b1	Slfn9
	Nup210	Ppwd1
	Apom	Ccdc14
	Slc1a4	Dact2
	Pgam2	Kank4
	Tmem131	Cdcp2
	Srcin1	Tmem132d
	Nprl2	Fry
	Mia	Slc13a4
	Egfl6	Kirrel2
	Prx	Hydin
[truncated: 1,146 more rows]

## Sheet: Extended Data Fig.6g
Extended Data Fig.6g:Gene ontology analysis of genes both downregulated in Lmna G609G/G609G mESC and upregulated in CTH OE or CBS OE mESC. Log2 fold change ≤- 0.58, ≥ 0.58; p-adjusted value <0.05
Gene ontology: biological process
KEGG	Term	GROUP	Count	percent	PValue
GO:0030154	cell differentiation	CTH OE & LmnaG609G/G609G	32	8.71935	1.07752e-10
GO:0007283	spermatogenesis	CTH OE & LmnaG609G/G609G	27	7.35695	9.13458e-10
GO:0098655	monoatomic cation transmembrane transport	CTH OE & LmnaG609G/G609G	7	1.90736	1.63772e-05
GO:0007140	male meiotic nuclear division	CTH OE & LmnaG609G/G609G	6	1.63488	8.14791e-05
GO:0072659	protein localization to plasma membrane	CTH OE & LmnaG609G/G609G	10	2.7248	0.000202175
GO:0019344	cysteine biosynthetic process	CTH OE & LmnaG609G/G609G	3	0.817439	0.000414222
GO:0070588	calcium ion transport	CTH OE & LmnaG609G/G609G	8	2.17984	0.000634335
GO:0035556	intracellular signal transduction	CTH OE & LmnaG609G/G609G	15	4.08719	0.000697074
GO:0019827	stem cell population maintenance	CTH OE & LmnaG609G/G609G	6	1.63488	0.000717124
GO:0035725	sodium ion transmembrane transport	CTH OE & LmnaG609G/G609G	8	2.17984	0.000965906
GO:0141196	transposable element silencing by piRNA-mediated DNA methylation	CTH OE & LmnaG609G/G609G	4	1.08992	0.000982892
GO:1990830	cellular response to leukemia inhibitory factor	CTH OE & LmnaG609G/G609G	12	3.26975	0.00132346
GO:0048013	ephrin receptor signaling pathway	CTH OE & LmnaG609G/G609G	6	1.63488	0.00196263
GO:0006357	regulation of transcription by RNA polymerase II	CTH OE & LmnaG609G/G609G	33	8.99183	0.00199853
GO:0000122	negative regulation of transcription by RNA polymerase II	CTH OE & LmnaG609G/G609G	24	6.53951	0.00212239
GO:0035235	ionotropic glutamate receptor signaling pathway	CTH OE & LmnaG609G/G609G	4	1.08992	0.00213075
GO:0006816	calcium ion transport	CTH OE & LmnaG609G/G609G	7	1.90736	0.00218189
GO:0045893	positive regulation of DNA-templated transcription	CTH OE & LmnaG609G/G609G	20	5.44959	0.00263015
GO:0036323	vascular endothelial growth factor receptor-1 signaling pathway	CTH OE & LmnaG609G/G609G	5	1.3624	0.00266855
GO:0035790	platelet-derived growth factor receptor-alpha signaling pathway	CTH OE & LmnaG609G/G609G	5	1.3624	0.00287396
GO:0045944	positive regulation of transcription by RNA polymerase II	CTH OE & LmnaG609G/G609G	28	7.62943	0.00293188
GO:0038145	macrophage colony-stimulating factor signaling pathway	CTH OE & LmnaG609G/G609G	5	1.3624	0.00308993
GO:0038109	Kit signaling pathway	CTH OE & LmnaG609G/G609G	5	1.3624	0.00331671
GO:0035791	platelet-derived growth factor receptor-beta signaling pathway	CTH OE & LmnaG609G/G609G	5	1.3624	0.00355456
GO:0031547	brain-derived neurotrophic factor receptor signaling pathway	CTH OE & LmnaG609G/G609G	5	1.3624	0.00406448
GO:0006883	intracellular sodium ion homeostasis	CTH OE & LmnaG609G/G609G	4	1.08992	0.00430179
GO:0048012	hepatocyte growth factor receptor signaling pathway	CTH OE & LmnaG609G/G609G	5	1.3624	0.00433703
GO:0038063	collagen-activated tyrosine kinase receptor signaling pathway	CTH OE & LmnaG609G/G609G	5	1.3624	0.005228
GO:0007154	cell communication	CTH OE & LmnaG609G/G609G	4	1.08992	0.00575059
GO:0038084	vascular endothelial growth factor signaling pathway	CTH OE & LmnaG609G/G609G	5	1.3624	0.0058854
GO:0030198	extracellular matrix organization	CTH OE & LmnaG609G/G609G	8	2.17984	0.00608703
GO:0051321	meiotic cell cycle	CTH OE & LmnaG609G/G609G	7	1.90736	0.006511
GO:0009880	embryonic pattern specification	CTH OE & LmnaG609G/G609G	4	1.08992	0.00685993
GO:0032526	response to retinoic acid	CTH OE & LmnaG609G/G609G	5	1.3624	0.00697113
GO:0009566	fertilization	CTH OE & LmnaG609G/G609G	5	1.3624	0.00736047
GO:0030317	flagellated sperm motility	CTH OE & LmnaG609G/G609G	8	2.17984	0.00742948
GO:0007010	cytoskeleton organization	CTH OE & LmnaG609G/G609G	7	1.90736	0.00819459
GO:0008543	fibroblast growth factor receptor signaling pathway	CTH OE & LmnaG609G/G609G	6	1.63488	0.00825145
GO:0046777	protein autophosphorylation	CTH OE & LmnaG609G/G609G	7	1.90736	0.00872818
GO:0071300	cellular response to retinoic acid	CTH OE & LmnaG609G/G609G	5	1.3624	0.00952205
GO:0098609	cell-cell adhesion	CTH OE & LmnaG609G/G609G	8	2.17984	0.00971303
GO:0010526	transposable element silencing	CTH OE & LmnaG609G/G609G	3	0.817439	0.00995964
GO:0007566	embryo implantation	CTH OE & LmnaG609G/G609G	5	1.3624	0.00999869
GO:0060444	branching involved in mammary gland duct morphogenesis	CTH OE & LmnaG609G/G609G	3	0.817439	0.0115296
GO:0008104	protein localization	CTH OE & LmnaG609G/G609G	8	2.17984	0.0127725
GO:0036376	sodium ion export across plasma membrane	CTH OE & LmnaG609G/G609G	3	0.817439	0.0132004
GO:0007216	G protein-coupled glutamate receptor signaling pathway	CTH OE & LmnaG609G/G609G	3	0.817439	0.0132004
GO:0035019	somatic stem cell population maintenance	CTH OE & LmnaG609G/G609G	5	1.3624	0.0137702
GO:0007129	homologous chromosome pairing at meiosis	CTH OE & LmnaG609G/G609G	4	1.08992	0.0142315
GO:0007399	nervous system development	CTH OE & LmnaG609G/G609G	10	2.7248	0.0146471
GO:0030007	intracellular potassium ion homeostasis	CTH OE & LmnaG609G/G609G	3	0.817439	0.0149695
GO:0009100	glycoprotein metabolic process	CTH OE & LmnaG609G/G609G	3	0.817439	0.0149695
GO:0048009	insulin-like growth factor receptor signaling pathway	CTH OE & LmnaG609G/G609G	5	1.3624	0.0162809
GO:0007281	germ cell development	CTH OE & LmnaG609G/G609G	5	1.3624	0.0162809
GO:1901653	cellular response to peptide	CTH OE & LmnaG609G/G609G	3	0.817439	0.0168344
GO:0040037	negative regulation of fibroblast growth factor receptor signaling pathway	CTH OE & LmnaG609G/G609G	3	0.817439	0.0168344
GO:0070373	negative regulation of ERK1 and ERK2 cascade	CTH OE & LmnaG609G/G609G	5	1.3624	0.0190612
GO:0034587	piRNA processing	CTH OE & LmnaG609G/G609G	3	0.817439	0.0208415
GO:1903976	negative regulation of glial cell migration	CTH OE & LmnaG609G/G609G	2	0.544959	0.0234877
GO:1902490	regulation of sperm capacitation	CTH OE & LmnaG609G/G609G	2	0.544959	0.0234877
GO:0019343	cysteine biosynthetic process via cystathionine	CTH OE & LmnaG609G/G609G	2	0.544959	0.0234877
GO:0048599	oocyte development	CTH OE & LmnaG609G/G609G	3	0.817439	0.0252023
GO:0035234	ectopic germ cell programmed cell death	CTH OE & LmnaG609G/G609G	3	0.817439	0.0252023
GO:0046785	microtubule polymerization	CTH OE & LmnaG609G/G609G	3	0.817439	0.0252023
GO:0007173	epidermal growth factor receptor signaling pathway	CTH OE & LmnaG609G/G609G	5	1.3624	0.0263377
GO:0006749	glutathione metabolic process	CTH OE & LmnaG609G/G609G	4	1.08992	0.0272922
GO:2000737	negative regulation of stem cell differentiation	CTH OE & LmnaG609G/G609G	3	0.817439	0.0275094
GO:0032781	positive regulation of ATP-dependent activity	CTH OE & LmnaG609G/G609G	3	0.817439	0.029898
GO:0007601	visual perception	CTH OE & LmnaG609G/G609G	6	1.63488	0.0331068
GO:0098877	neurotransmitter receptor transport to plasma membrane	CTH OE & LmnaG609G/G609G	2	0.544959	0.0350244
GO:0070814	hydrogen sulfide biosynthetic process	CTH OE & LmnaG609G/G609G	2	0.544959	0.0350244
GO:0019448	L-cysteine catabolic process	CTH OE & LmnaG609G/G609G	2	0.544959	0.0350244
GO:0036098	male germ-line stem cell population maintenance	CTH OE & LmnaG609G/G609G	2	0.544959	0.0350244
GO:0045026	plasma membrane fusion	CTH OE & LmnaG609G/G609G	2	0.544959	0.0350244
GO:0016525	negative regulation of angiogenesis	CTH OE & LmnaG609G/G609G	5	1.3624	0.0350732
GO:0008584	male gonad development	CTH OE & LmnaG609G/G609G	6	1.63488	0.0355914
GO:0098696	regulation of neurotransmitter receptor localization to postsynaptic specialization membrane	CTH OE & LmnaG609G/G609G	3	0.817439	0.0375304
GO:0032148	activation of protein kinase B activity	CTH OE & LmnaG609G/G609G	3	0.817439	0.042986
GO:0060079	excitatory postsynaptic potential	CTH OE & LmnaG609G/G609G	4	1.08992	0.0449927
GO:0017157	regulation of exocytosis	CTH OE & LmnaG609G/G609G	3	0.817439	0.0458179
GO:0019346	transsulfuration	CTH OE & LmnaG609G/G609G	2	0.544959	0.0464252
GO:1903539	protein localization to postsynaptic membrane	CTH OE & LmnaG609G/G609G	2	0.544959	0.0464252
GO:0061017	hepatoblast differentiation	CTH OE & LmnaG609G/G609G	2	0.544959	0.0464252
GO:0140965	secondary piRNA processing	CTH OE & LmnaG609G/G609G	2	0.544959	0.0464252
GO:0007165	signal transduction	CTH OE & LmnaG609G/G609G	18	4.90463	0.0494467
GO:0043433	negative regulation of DNA-binding transcription factor activity	CTH OE & LmnaG609G/G609G	4	1.08992	0.0555212
GO:0010454	negative regulation of cell fate commitment	CTH OE & LmnaG609G/G609G	2	0.544959	0.0576917
GO:0140991	piRNA-mediated gene silencing by mRNA destabilization	CTH OE & LmnaG609G/G609G	2	0.544959	0.0576917
GO:2000757	negative regulation of peptidyl-lysine acetylation	CTH OE & LmnaG609G/G609G	2	0.544959	0.0576917
GO:0048168	regulation of neuronal synaptic plasticity	CTH OE & LmnaG609G/G609G	3	0.817439	0.0577922
GO:0007613	memory	CTH OE & LmnaG609G/G609G	5	1.3624	0.0598157
GO:0001708	cell fate specification	CTH OE & LmnaG609G/G609G	3	0.817439	0.060938
GO:0043403	skeletal muscle tissue regeneration	CTH OE & LmnaG609G/G609G	3	0.817439	0.060938
GO:0019722	calcium-mediated signaling	CTH OE & LmnaG609G/G609G	5	1.3624	0.0612446
GO:0001892	embryonic placenta development	CTH OE & LmnaG609G/G609G	3	0.817439	0.0641411
GO:0008286	insulin receptor signaling pathway	CTH OE & LmnaG609G/G609G	5	1.3624	0.0656389
GO:0001501	skeletal system development	CTH OE & LmnaG609G/G609G	5	1.3624	0.0656389
GO:0048863	stem cell differentiation	CTH OE & LmnaG609G/G609G	4	1.08992	0.0671093
GO:0060761	negative regulation of response to cytokine stimulus	CTH OE & LmnaG609G/G609G	2	0.544959	0.0688254
GO:1901018	positive regulation of potassium ion transmembrane transporter activity	CTH OE & LmnaG609G/G609G	2	0.544959	0.0688254
GO:0001714	endodermal cell fate specification	CTH OE & LmnaG609G/G609G	2	0.544959	0.0688254
GO:0043697	cell dedifferentiation	CTH OE & LmnaG609G/G609G	2	0.544959	0.0688254
GO:0006812	monoatomic cation transport	CTH OE & LmnaG609G/G609G	3	0.817439	0.0707117
GO:0001568	blood vessel development	CTH OE & LmnaG609G/G609G	4	1.08992	0.0711979
GO:1903288	positive regulation of potassium ion import across plasma membrane	CTH OE & LmnaG609G/G609G	2	0.544959	0.079828
GO:2000210	positive regulation of anoikis	CTH OE & LmnaG609G/G609G	2	0.544959	0.079828
GO:1904062	regulation of monoatomic cation transmembrane transport	CTH OE & LmnaG609G/G609G	2	0.544959	0.079828
GO:0014905	myoblast fusion involved in skeletal muscle regeneration	CTH OE & LmnaG609G/G609G	2	0.544959	0.079828
GO:0045836	positive regulation of meiotic nuclear division	CTH OE & LmnaG609G/G609G	2	0.544959	0.079828
GO:1904428	negative regulation of tubulin deacetylation	CTH OE & LmnaG609G/G609G	2	0.544959	0.079828
GO:0001975	response to amphetamine	CTH OE & LmnaG609G/G609G	3	0.817439	0.0809533
GO:0048565	digestive tract development	CTH OE & LmnaG609G/G609G	3	0.817439	0.0809533
GO:0045664	regulation of neuron differentiation	CTH OE & LmnaG609G/G609G	3	0.817439	0.0809533
GO:0007169	cell surface receptor protein tyrosine kinase signaling pathway	CTH OE & LmnaG609G/G609G	4	1.08992	0.0841102
GO:0009966	regulation of signal transduction	CTH OE & LmnaG609G/G609G	4	1.08992	0.0841102
GO:0006694	steroid biosynthetic process	CTH OE & LmnaG609G/G609G	3	0.817439	0.0880189
GO:1902514	regulation of calcium ion transmembrane transport via high voltage-gated calcium channel	CTH OE & LmnaG609G/G609G	2	0.544959	0.0907009
GO:0034220	monoatomic ion transmembrane transport	CTH OE & LmnaG609G/G609G	4	1.08992	0.0909149
GO:0002027	regulation of heart rate	CTH OE & LmnaG609G/G609G	3	0.817439	0.0916183
GO:2001234	negative regulation of apoptotic signaling pathway	CTH OE & LmnaG609G/G609G	3	0.817439	0.0916183
GO:0050873	brown fat cell differentiation	CTH OE & LmnaG609G/G609G	3	0.817439	0.0916183
GO:0006836	neurotransmitter transport	CTH OE & LmnaG609G/G609G	3	0.817439	0.0916183
GO:1990573	potassium ion import across plasma membrane	CTH OE & LmnaG609G/G609G	3	0.817439	0.09526
GO:0000902	cell morphogenesis	CTH OE & LmnaG609G/G609G	5	1.3624	0.0970928
GO:0006351	DNA-templated transcription	CTH OE & LmnaG609G/G609G	4	1.08992	0.0979406
GO:0050804	modulation of chemical synaptic transmission	CTH OE & LmnaG609G/G609G	5	1.3624	0.0989144
GO:0030154	cell differentiation	CBS OE & LmnaG609G/G609G	29	8.45481	1.73166e-09
GO:0007283	spermatogenesis	CBS OE & LmnaG609G/G609G	23	6.70554	9.94634e-08
GO:0007140	male meiotic nuclear division	CBS OE & LmnaG609G/G609G	6	1.74927	5.83432e-05
GO:0019344	cysteine biosynthetic process	CBS OE & LmnaG609G/G609G	3	0.874636	0.000359632
GO:0019827	stem cell population maintenance	CBS OE & LmnaG609G/G609G	6	1.74927	0.000521045
GO:0007216	G protein-coupled glutamate receptor signaling pathway	CBS OE & LmnaG609G/G609G	4	1.16618	0.000544792
GO:0141196	transposable element silencing by piRNA-mediated DNA methylation	CBS OE & LmnaG609G/G609G	4	1.16618	0.000801017
GO:0006644	phospholipid metabolic process	CBS OE & LmnaG609G/G609G	5	1.45773	0.00206642
GO:1990830	cellular response to leukemia inhibitory factor	CBS OE & LmnaG609G/G609G	11	3.207	0.00256585
GO:0045893	positive regulation of DNA-templated transcription	CBS OE & LmnaG609G/G609G	19	5.53936	0.00281565
GO:0006883	sodium ion transmembrane transport	CBS OE & LmnaG609G/G609G	4	1.16618	0.00352891
GO:0051321	meiotic cell cycle	CBS OE & LmnaG609G/G609G	7	2.04082	0.00464764
GO:0030317	flagellated sperm motility	CBS OE & LmnaG609G/G609G	8	2.33236	0.00510701
GO:0007215	glutamate receptor signaling pathway	CBS OE & LmnaG609G/G609G	3	0.874636	0.005126
GO:0009880	embryonic pattern specification	CBS OE & LmnaG609G/G609G	4	1.16618	0.00564412
GO:0009566	fertilization	CBS OE & LmnaG609G/G609G	5	1.45773	0.00575692
GO:0001892	embryonic placenta development	CBS OE & LmnaG609G/G609G	4	1.16618	0.00666217
GO:0098609	cell-cell adhesion	CBS OE & LmnaG609G/G609G	8	2.33236	0.00673383
GO:0007566	embryo implantation	CBS OE & LmnaG609G/G609G	5	1.45773	0.00784945
GO:0010526	transposable element silencing	CBS OE & LmnaG609G/G609G	3	0.874636	0.00869364
GO:0048863	stem cell differentiation	CBS OE & LmnaG609G/G609G	5	1.45773	0.0113392
GO:0036376	sodium ion export across plasma membrane	CBS OE & LmnaG609G/G609G	3	0.874636	0.0115347
GO:0006119	oxidative phosphorylation	CBS OE & LmnaG609G/G609G	3	0.874636	0.0115347
GO:0007129	homologous chromosome pairing at meiosis	CBS OE & LmnaG609G/G609G	4	1.16618	0.011778
GO:0030007	intracellular potassium ion homeostasis	CBS OE & LmnaG609G/G609G	3	0.874636	0.0130875
GO:0009100	glycoprotein metabolic process	CBS OE & LmnaG609G/G609G	3	0.874636	0.0130875
GO:0006790	sulfur compound metabolic process	CBS OE & LmnaG609G/G609G	3	0.874636	0.0130875
GO:0098655	monoatomic cation transmembrane transport	CBS OE & LmnaG609G/G609G	4	1.16618	0.0141427
GO:0040037	negative regulation of fibroblast growth factor receptor signaling pathway	CBS OE & LmnaG609G/G609G	3	0.874636	0.0147257
GO:0070373	negative regulation of ERK1 and ERK2 cascade	CBS OE & LmnaG609G/G609G	5	1.45773	0.015102
GO:0035725	sodium ion transmembrane transport	CBS OE & LmnaG609G/G609G	6	1.74927	0.0151324
GO:0030198	extracellular matrix organization	CBS OE & LmnaG609G/G609G	7	2.04082	0.0157836
GO:0036323	vascular endothelial growth factor receptor-1 signaling pathway	CBS OE & LmnaG609G/G609G	4	1.16618	0.0167572
GO:0035790	platelet-derived growth factor receptor-alpha signaling pathway	CBS OE & LmnaG609G/G609G	4	1.16618	0.0176847
GO:0034587	piRNA processing	CBS OE & LmnaG609G/G609G	3	0.874636	0.01825
GO:0038145	macrophage colony-stimulating factor signaling pathway	CBS OE & LmnaG609G/G609G	4	1.16618	0.0186403
GO:0038109	Kit signaling pathway	CBS OE & LmnaG609G/G609G	4	1.16618	0.019624
GO:0035791	platelet-derived growth factor receptor-beta signaling pathway	CBS OE & LmnaG609G/G609G	4	1.16618	0.0206359
GO:1902490	regulation of sperm capacitation	CBS OE & LmnaG609G/G609G	2	0.58309	0.0218906
GO:0019343	cysteine biosynthetic process via cystathionine	CBS OE & LmnaG609G/G609G	2	0.58309	0.0218906
GO:1903976	negative regulation of glial cell migration	CBS OE & LmnaG609G/G609G	2	0.58309	0.0218906
GO:0006123	mitochondrial electron transport, cytochrome c to oxygen	CBS OE & LmnaG609G/G609G	3	0.874636	0.0220917
GO:0001516	prostaglandin biosynthetic process	CBS OE & LmnaG609G/G609G	3	0.874636	0.0220917
GO:0006749	glutathione metabolic process	CBS OE & LmnaG609G/G609G	4	1.16618	0.0227442
GO:0031547	brain-derived neurotrophic factor receptor signaling pathway	CBS OE & LmnaG609G/G609G	4	1.16618	0.0227442
GO:0048012	hepatocyte growth factor receptor signaling pathway	CBS OE & LmnaG609G/G609G	4	1.16618	0.0238407
GO:2000737	negative regulation of stem cell differentiation	CBS OE & LmnaG609G/G609G	3	0.874636	0.0241268
GO:0006357	regulation of transcription by RNA polymerase II	CBS OE & LmnaG609G/G609G	27	7.87172	0.0254249
GO:0032781	positive regulation of ATP-dependent activity	CBS OE & LmnaG609G/G609G	3	0.874636	0.0262353
GO:0060292	long-term synaptic depression	CBS OE & LmnaG609G/G609G	3	0.874636	0.0262353
GO:0038063	collagen-activated tyrosine kinase receptor signaling pathway	CBS OE & LmnaG609G/G609G	4	1.16618	0.0272991
GO:0045944	positive regulation of transcription by RNA polymerase II	CBS OE & LmnaG609G/G609G	23	6.70554	0.0277146
GO:0008543	fibroblast growth factor receptor signaling pathway	CBS OE & LmnaG609G/G609G	5	1.45773	0.0289591
GO:0008104	protein localization	CBS OE & LmnaG609G/G609G	7	2.04082	0.0290941
GO:0038084	vascular endothelial growth factor signaling pathway	CBS OE & LmnaG609G/G609G	4	1.16618	0.0297452
GO:0070814	hydrogen sulfide biosynthetic process	CBS OE & LmnaG609G/G609G	2	0.58309	0.032656
GO:2001023	regulation of response to drug	CBS OE & LmnaG609G/G609G	2	0.58309	0.032656
GO:0098877	neurotransmitter receptor transport to plasma membrane	CBS OE & LmnaG609G/G609G	2	0.58309	0.032656
GO:2000124	regulation of endocannabinoid signaling pathway	CBS OE & LmnaG609G/G609G	2	0.58309	0.032656
GO:0036098	male germ-line stem cell population maintenance	CBS OE & LmnaG609G/G609G	2	0.58309	0.032656
GO:0045026	plasma membrane fusion	CBS OE & LmnaG609G/G609G	2	0.58309	0.032656
GO:0032526	response to retinoic acid	CBS OE & LmnaG609G/G609G	4	1.16618	0.0336238
GO:0010666	positive regulation of cardiac muscle cell apoptotic process	CBS OE & LmnaG609G/G609G	3	0.874636	0.0353687
GO:0006816	calcium ion transport	CBS OE & LmnaG609G/G609G	5	1.45773	0.0354791
GO:0032148	activation of protein kinase B activity	CBS OE & LmnaG609G/G609G	3	0.874636	0.0378179
GO:0010467	gene expression	CBS OE & LmnaG609G/G609G	10	2.91545	0.0423474
GO:0061017	hepatoblast differentiation	CBS OE & LmnaG609G/G609G	2	0.58309	0.0433033
GO:0140965	secondary piRNA processing	CBS OE & LmnaG609G/G609G	2	0.58309	0.0433033
GO:0019346	transsulfuration	CBS OE & LmnaG609G/G609G	2	0.58309	0.0433033
GO:0007154	cell communication	CBS OE & LmnaG609G/G609G	3	0.874636	0.0455363
GO:0070588	calcium ion transmembrane transport	CBS OE & LmnaG609G/G609G	5	1.45773	0.0461505
GO:0048013	ephrin receptor signaling pathway	CBS OE & LmnaG609G/G609G	4	1.16618	0.0499534
GO:0001708	cell fate specification	CBS OE & LmnaG609G/G609G	3	0.874636	0.0537766
GO:0010454	negative regulation of cell fate commitment	CBS OE & LmnaG609G/G609G	2	0.58309	0.0538338
GO:0140991	piRNA-mediated gene silencing by mRNA destabilization	CBS OE & LmnaG609G/G609G	2	0.58309	0.0538338
GO:0007286	spermatid development	CBS OE & LmnaG609G/G609G	6	1.74927	0.0541616
GO:0035019	somatic stem cell population maintenance	CBS OE & LmnaG609G/G609G	4	1.16618	0.0549653
GO:0048009	insulin-like growth factor receptor signaling pathway	CBS OE & LmnaG609G/G609G	4	1.16618	0.0620053
GO:0007281	germ cell development	CBS OE & LmnaG609G/G609G	4	1.16618	0.0620053
GO:1901018	positive regulation of potassium ion transmembrane transporter activity	CBS OE & LmnaG609G/G609G	2	0.58309	0.0642488
GO:0043697	cell dedifferentiation	CBS OE & LmnaG609G/G609G	2	0.58309	0.0642488
GO:0071242	cellular response to ammonium ion	CBS OE & LmnaG609G/G609G	2	0.58309	0.0642488
GO:1904158	axonemal central apparatus assembly	CBS OE & LmnaG609G/G609G	2	0.58309	0.0642488
GO:0007399	nervous system development	CBS OE & LmnaG609G/G609G	8	2.33236	0.0651249
GO:0043393	regulation of protein binding	CBS OE & LmnaG609G/G609G	3	0.874636	0.0655032
GO:0009966	regulation of signal transduction	CBS OE & LmnaG609G/G609G	4	1.16618	0.0713614
GO:0048565	digestive tract development	CBS OE & LmnaG609G/G609G	3	0.874636	0.0716569
GO:0052651	monoacylglycerol catabolic process	CBS OE & LmnaG609G/G609G	2	0.58309	0.0745494
GO:0070292	N-acylphosphatidylethanolamine metabolic process	CBS OE & LmnaG609G/G609G	2	0.58309	0.0745494
GO:0045836	positive regulation of meiotic nuclear division	CBS OE & LmnaG609G/G609G	2	0.58309	0.0745494
GO:1904428	negative regulation of tubulin deacetylation	CBS OE & LmnaG609G/G609G	2	0.58309	0.0745494
GO:0090461	intracellular glutamate homeostasis	CBS OE & LmnaG609G/G609G	2	0.58309	0.0745494
GO:0007196	adenylate cyclase-inhibiting G protein-coupled glutamate receptor signaling pathway	CBS OE & LmnaG609G/G609G	2	0.58309	0.0745494
GO:1903288	positive regulation of potassium ion import across plasma membrane	CBS OE & LmnaG609G/G609G	2	0.58309	0.0745494
GO:0071371	cellular response to gonadotropin stimulus	CBS OE & LmnaG609G/G609G	2	0.58309	0.0745494
GO:0034220	monoatomic ion transmembrane transport	CBS OE & LmnaG609G/G609G	4	1.16618	0.077261
GO:2001234	negative regulation of apoptotic signaling pathway	CBS OE & LmnaG609G/G609G	3	0.874636	0.081219
GO:0002027	regulation of heart rate	CBS OE & LmnaG609G/G609G	3	0.874636	0.081219
GO:0006836	neurotransmitter transport	CBS OE & LmnaG609G/G609G	3	0.874636	0.081219
GO:0050804	modulation of chemical synaptic transmission	CBS OE & LmnaG609G/G609G	5	1.45773	0.0812776
GO:0006351	DNA-templated transcription	CBS OE & LmnaG609G/G609G	4	1.16618	0.0833672
GO:0007601	visual perception	CBS OE & LmnaG609G/G609G	5	1.45773	0.0844058
GO:1990573	potassium ion import across plasma membrane	CBS OE & LmnaG609G/G609G	3	0.874636	0.0844895
GO:1902514	regulation of calcium ion transmembrane transport via high voltage-gated calcium channel	CBS OE & LmnaG609G/G609G	2	0.58309	0.084737
GO:0050667	homocysteine metabolic process	CBS OE & LmnaG609G/G609G	2	0.58309	0.084737
GO:0007173	epidermal growth factor receptor signaling pathway	CBS OE & LmnaG609G/G609G	4	1.16618	0.0875496
GO:0007165	signal transduction	CBS OE & LmnaG609G/G609G	16	4.66472	0.0887893
GO:0008584	male gonad development	CBS OE & LmnaG609G/G609G	5	1.45773	0.0892071
GO:0045214	sarcomere organization	CBS OE & LmnaG609G/G609G	3	0.874636	0.0911474
GO:0003310	pancreatic A cell differentiation	CBS OE & LmnaG609G/G609G	2	0.58309	0.0948128
GO:0042743	hydrogen peroxide metabolic process	CBS OE & LmnaG609G/G609G	2	0.58309	0.0948128
GO:1900121	negative regulation of receptor binding	CBS OE & LmnaG609G/G609G	2	0.58309	0.0948128
GO:2000781	positive regulation of double-strand break repair	CBS OE & LmnaG609G/G609G	3	0.874636	0.097953
GO:0045494	photoreceptor cell maintenance	CBS OE & LmnaG609G/G609G	3	0.874636	0.097953

## Sheet: Extended Data Fig.6h
Extended Data Fig.6h: Relative mRNA expression
LADs gene
	Control				Lmna G609G/G609G				CTH OE Lmna G609G/G609G				CBS OE Lmna G609G/G609G
Dchs2	0.758382	1.23804	0.839373	1.49575	0.358556	0.421585	0.489999	0.554627	0.91155	0.917979	1.76082	1.6021	1.09558	1.28962	1.38356	1.52029
Mycbp2	1.01979	1.03971	1.14732	1.06015	0.626213	0.248907	0.350485	0.539662	1.18516	1.28042	0.966885	0.804622	0.830995	0.732369	0.852583	0.880621
Non-LADs gene
	Control				Lmna G609G/G609G				CTH OE Lmna G609G/G609G				CBS OE Lmna G609G/G609G
Bmp4	0.94813	1.01428	1.19762	0.871138	0.32	0.32	0.34	0.31	1.08274	1.1077	0.98731	0.996744	1.03488	1.15369	0.907742	1.05933
Klf4	0.956952	1.06231	1.17625	1.15959	0.353554	0.402972	0.415378	0.384438	0.736274	0.752039	0.856023	0.831395	0.63838	0.701987	0.72604	0.720892
Klf5	0.943909	0.9448	0.984279	0.987709	0.470465	0.384513	0.408411	0.441675	0.929829	0.968425	0.964964	0.870904	0.847034	0.868236	0.812184	0.796738
Smarcd3	1.03831	1.00111	1.02803	1.18633	0.358263	0.309982	0.276148	0.344862	0.651706	0.59377	0.715084	0.642214	0.581371	0.601322	0.530825	0.558852
