# Supplementary material for: Lamin A/C-regulated cysteine catabolic flux modulates stem cell fate through epigenome reprogramming
Source: Springer Nature journal article supplement (doi:10.1038/s42255-025-01443-2), 2026-01-28
Supplement: MOESM33 [file 42255_2025_1443_MOESM33_ESM.xlsx]

## Sheet: Extended Data Fig.7a
Extended Data Fig.7a
Relative mRNA expression
	200uM Cys			100uM Cys			50uM Cys
Gata4	0.860397	1.16225	1.0123	0.648052	0.617884	0.7952	0.656202	0.618327	0.4215
Isl1	0.966233	1.03495	1.0145	0.730808	0.710936	0.5147	0.208541	0.460236	0.3512
Nkx2-5	0.905521	1.10434	1.06741	0.701395	0.632567	0.4412	0.527518	0.375947	0.3147

## Sheet: Extended Data Fig.7b
Extended Data Fig.7b
Relative mRNA expression
	200uM Cys			100uM Cys			50uM Cys
Mlc2a	1.00549	0.994538	1.0145	0.58184	0.56414	0.69412	0.439053	0.509503	0.3412
Mlc2v	1.10778	0.902706	1.01235	0.140025	0.244283	0.1254	0.111181	0.067179	0.01236
Tnnt2	0.930391	1.07482	1.09412	0.432635	0.349663	0.31452	0.294945	0.113792	0.10214

## Sheet: Extended Data Fig.7h
Extended Data Fig.7h
Relative mRNA expression
	Control				Lmna G609G/+				Lmna G609G/G609G
Eomes	0.94	1.07	1.01	0.96	0.39	0.42	0.21	0.49	0.46	0.45	0.21	0.13
Brachyury	1.02	0.98	1.12	0.96	0.12	0.23	0.16	0.27	0.19	0.11	0.11	0.01
Mesp1	1.06	0.94	0.97	1.01	0.29	0.31	0.11	0.17	0.17	0.12	0.02	0.07
AFP	1.1	0.91	0.95	0.99	0.33	0.32	0.25	0.12	0.36	0.28	0.15	0.38
Foxa2	1.12	0.89	1.02	1.01	0.75	0.82	0.62	0.45	0.32	0.68	0.39	0.49
Synapt	1.11	0.9	1.03	1.05	1	0.93	0.94	0.76	0.9	0.92	0.96	1.23
Th	0.83	1.21	1.12	0.96	0.98	1.17	0.72	1.12	0.71	1.03	1.12	0.98

## Sheet: Extended Data Fig.7i
Extended Data Fig.7i
Relative mRNA expression
	Control				Lmna G609G/+				Lmna G609G/G609G
Mlc2a	0.901	1.109	1.069	0.935	0.352	0.353	0.191	0.185	0.0981	0.3933	0.2741	0.4669
Mlc2v	1.047	0.955	1.068	0.936	0.195	0.204	0.589	0.626	0.12563	0.54136	0.3512	0.6214
Tnnt2	1.074	0.931	1.032	0.969	0.308	0.289	0.45	0.381	0.264	0.063	0.356	0.2541
