# Supplementary material for: Lamin A/C-regulated cysteine catabolic flux modulates stem cell fate through epigenome reprogramming
Source: Springer Nature journal article supplement (doi:10.1038/s42255-025-01443-2), 2026-01-28
Supplement: MOESM34 [file 42255_2025_1443_MOESM34_ESM.xlsx]

## Sheet: Extended Data Fig.8a
Extended Data Fig.8a
SAM/SAH
shCtrl WT	shCtrl Lmna-/-	shCbs Lmna-/-	Lmna G609G/G609G	CBS OE-Lmna G609G/G609G	CBS OE	shCbs WT
5.98423	4.04504	7.49504	10.0936	4.60058	4.34185	10.3881
6.00399	3.7225	13.2554	13.1861	6.48416	3.92442	13.5349
7.31333	4.30504	8.21507	9.85454	5.55576	3.81262	13.8633
10.8413	3.17841	9.51245	11.9547	6.74125	3.72475	12.2542

## Sheet: Extended Data Fig.8g
Extended Data Fig.8g
Relative mRNA expression
	Control				Lmna G609G/G609G				Cbs OE-Lmna G609G/G609G
Cdkn2a	0.982505	1.01781	0.993795	1.00624	1.58773	1.76381	1.9007	2.16468	0.944018	1.08002	0.760559	0.73217
Ccl2	0.930476	1.07472	0.914402	1.09361	3.21155	3.21105	3.4847	3.82151	1.45673	1.47966	0.393051	0.393265
Cxcl1	1.00465	0.995375	0.959018	1.04273	2.55877	2.65426	2.6953	2.03864	1.18966	1.06061	0.7415	0.877179
IL-1a	0.934671	1.0699	0.87534	1.14241	2.70436	1.69551	1.8173	1.44794	0.938327	1.20561	0.355327	0.391886
IL-1b	1.27457	0.784576	1.03	0.97	2.20298	2.00252	1.74	1.8	1.19608	1.1649	0.62	0.31
IL-6	0.860645	1.16192	0.64	1.57	1.73189	1.86098	1.96	4.52	1.00853	1.14297	1.29	1.28
Mmp10	0.979153	1.02129	1.22205	0.8183	1.6701	1.81857	1.48717	1.76083	0.890189	0.952341	1.00196	1.0411
Tnfrsf1b	1.03185	0.969133	0.875271	1.1425	2.09279	2.24885	1.40645	1.37384	1.1066	1.22033	0.834599	0.573077
Vim	0.997365	1.00264	1.01	0.99	1.35987	1.26724	1.48	1.44	0.695623	0.706048	0.8	0.75

## Sheet: Extended Data Fig.8h
Extended Data Fig.8h
Ratio of peripheral to nucleoplasmic mean lamin A/C fluorescence intensity (a.u)		Cardiomyocyte nuclear size (µm2)
Young	Old	Young	Old
1.44644	3.85391	44.578	17.577
1.611	3.50487	23.033	24.589
1.39842	1.4746	16.829	14.111
1.47386	2.11524	19.665	39.566
1.23804	2.1286	24.037	11.058
1.57311	1.73944	74.908	14.308
0.882726	2.51806	19.419	30.911
2.29138	4.9853	43.525	20
1.15577	2.90817	10.359	56.907
1.29436	5.89153	25.081	26.095
1.21486	4.12932	18.326	19.045
1.95096	3.62159	12.102	39.96
1.07262	4.42928	13.245	13.638
1.88915	1.80298	31.314	18.306
1.55256	2.81404	28.222	21.26
1.22206	1.72159	31.551	30.261
0.949854	2.42163	17.174	14.751
1.93672	2.91017	24.155	26.991
1.40948	3.56582	20.138	41.368
1.46686	4.28499	22.56	12.496
1.28533	6.43964	40.679	33.392
2.10986	1.83796	32.476	14.554
1.33376	5.29592	25.928	29.571
2.12867	2.30676	29.699	11.689
0.92275	3.59659	42.422	33.668
1.54263	2.28494	15.194	10.527
1.491	1.26967	45.081	25.376
1.89255	4.82016	84.263	11.699
1.60447	4.0173	34.731	16.563
1.61345	4.14408	30.093	21.142
2.06552	2.20934	24.086	35.775
1.24461	1.27979	75.981	20.561
1.70002	3.35139	16.494	16.908
0.999865	1.40452	24.077	21.605
1.51976	1.53425	21.674	14.663
1.23427	2.14596	32.437	25.987
1.29449	1.44436	71.166	13.885
1.53753	3.83543	29.138	23.24
1.31698	3.19564	32.821	23.436
1.19132	2.67969	18.464	21.221
1.58469	3.59741	12.26	13.254
1.89175	2.35851	27.395	28.636
1.64809	5.03264	42.54	14.574
1.51354	1.59581	54.613	10.015
1.4408	5.93787	41.408	33.353
1.35071	3.47039	31.344	10.99
1.32449	2.74325	67.257	19.458
0.862141	3.71561	41.161	14.16
1.51952	2.76691	10.399	10.172
1.39897	1.72295	46.952	15.283
1.43095	1.86378	39.143	21.674
		56.395	31.117
		36.868	12.624
		21.487	10.241
		63.84	26.794
		38.365	15.765
		11.955	11.295
		32.457	16.691
		39.005	32.781
		33.057	28.537
		28.98	24.923
		42.619	13.245
		33.884	11.482
		18.03	22.915
		43.387	11.019
		23.752	15.756
		13.087	15.805
		13.048	25.13
		30.714	15.716
		24.707	11.846
		36.573	16.199
		18.444	17.459
		94.11	24.923
		21.241	20.354
		31.413	16.957
		44.716	19.773
		10.202	21.654
		12.23	16.051
		26.44	27.336
		22.393	10.281
		15.027	23.092
		31.117	13.481
		48.695	13.422
		47.355	32.594
		14.889	26.243
		21.91	17.922
		11.866	10.852
		17.942	23.702
		28.803	10.054
		33.609	27.641
		34.14	29.404
		36.366	26.135
		48.32	24.313
		37.439	30.911
		46.568	36.051
		17.469	34.82
		18.011	15.106
		17.321	14.574
		24.047	38.975
		39.458	29.384
		45.061	34.396
			15.539
		20.079	37.764
		30.339	17.696
		18.424	17.115
		46.44	18.995
		48.163	30.556
		28.449	29.128
			26.853
			11.246
			31.649
			32.23
			25.603
			37.045
			21.536
			18.897
			30.477
			55.263
Test method	p	Test method	p
Two-tailed unpaired t test	<0.0001	Two-tailed unpaired t test	<0.0001

## Sheet: Extended Data Fig.8j
Extended Data Fig.8j
Relative mRNA expression
	Young							Old
Cdkn2a	1.05	0.93	0.85	1.27	0.83	1.15	1.42	1.84	2.92	3.27	5.55	2.28	2	1.87
Ccl2	1.32	1.22	0.91	1.11	0.88	0.69	1.37	1.74	2.32	1.54	1.51	1.81	3.34	3.2
Cxcl1	1.13	1.06	0.78	1.02	0.85	1.24	1.89	3.09	2.55	2.06	2.65	1.82	4.56	4.76
IL-1a	1.17	0.84	1.06	1.01	1.01	0.95	1.23	1.62	2.26	1.72	3.18	3.99	2.97	2.6
IL-1b	0.57	1.67	0.69	0.91	1.51	1.11	1.41	4.55	4.66	2.06	2.06	2.33	4.22	5.08
IL-6	1.28	1.04	1.29	0.77	0.96	0.79	1.8	5.56	4.31	3.24	3.03	4.32	5.87	4.43
Mmp10	0.94	1.19	1.25	1.03	0.81	0.85	1.27	2.74	2.22	2.1	2.41	3.05	5.48	5.42
Tnfrsf1b	0.95	0.98	1.02	1	1.13	0.88	1.01	1.64	1.68	1.9	2.88	2.84	1.53	1.58
Vim	0.95	0.98	1.08	1.09	0.95	0.96	1.77	1.39	1.36	1.35	2.32	2.13	2.68	2.73
Mmp12	1.18	1.3	1.3	0.85	0.88	0.67	1.1	2.26	1.89	2.23	3.45	2.36	2.02	2.82
Tgfb1	0.91	1.01	1.12	1.06	0.92	1	1.01	1.35	1.31	1.15	1.19	1.16	1.03	0.95
