# Supplementary figures and images for: Lamin A/C-regulated cysteine catabolic flux modulates stem cell fate through epigenome reprogramming
Source: Springer Nature journal article supplement (doi:10.1038/s42255-025-01443-2), 2026-01-28

Full unedited blots for Fig. 1g

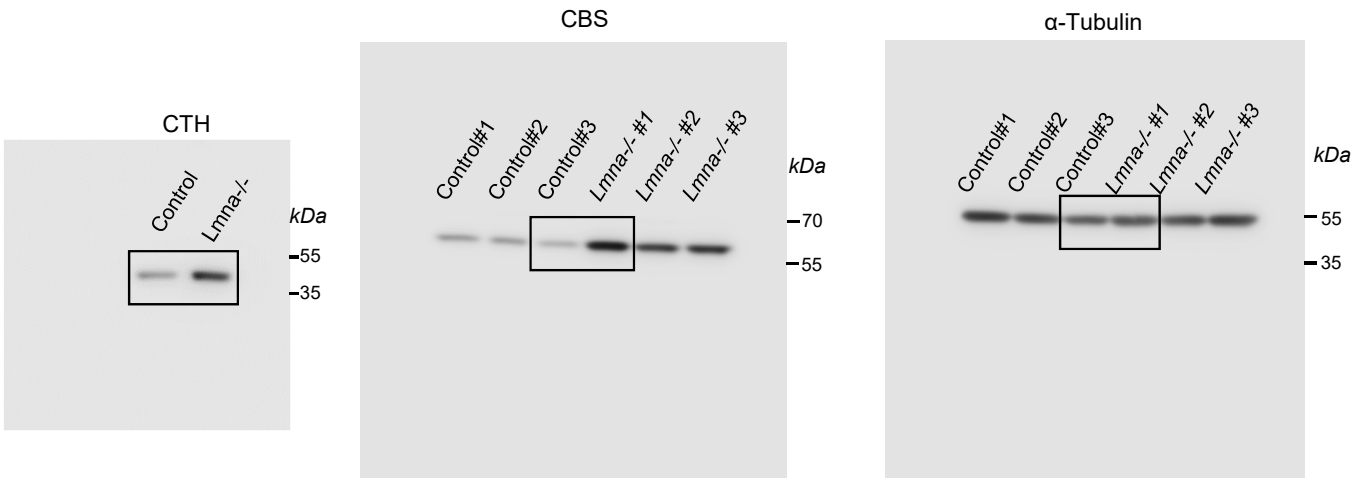

Full unedited blots for Fig. 1m

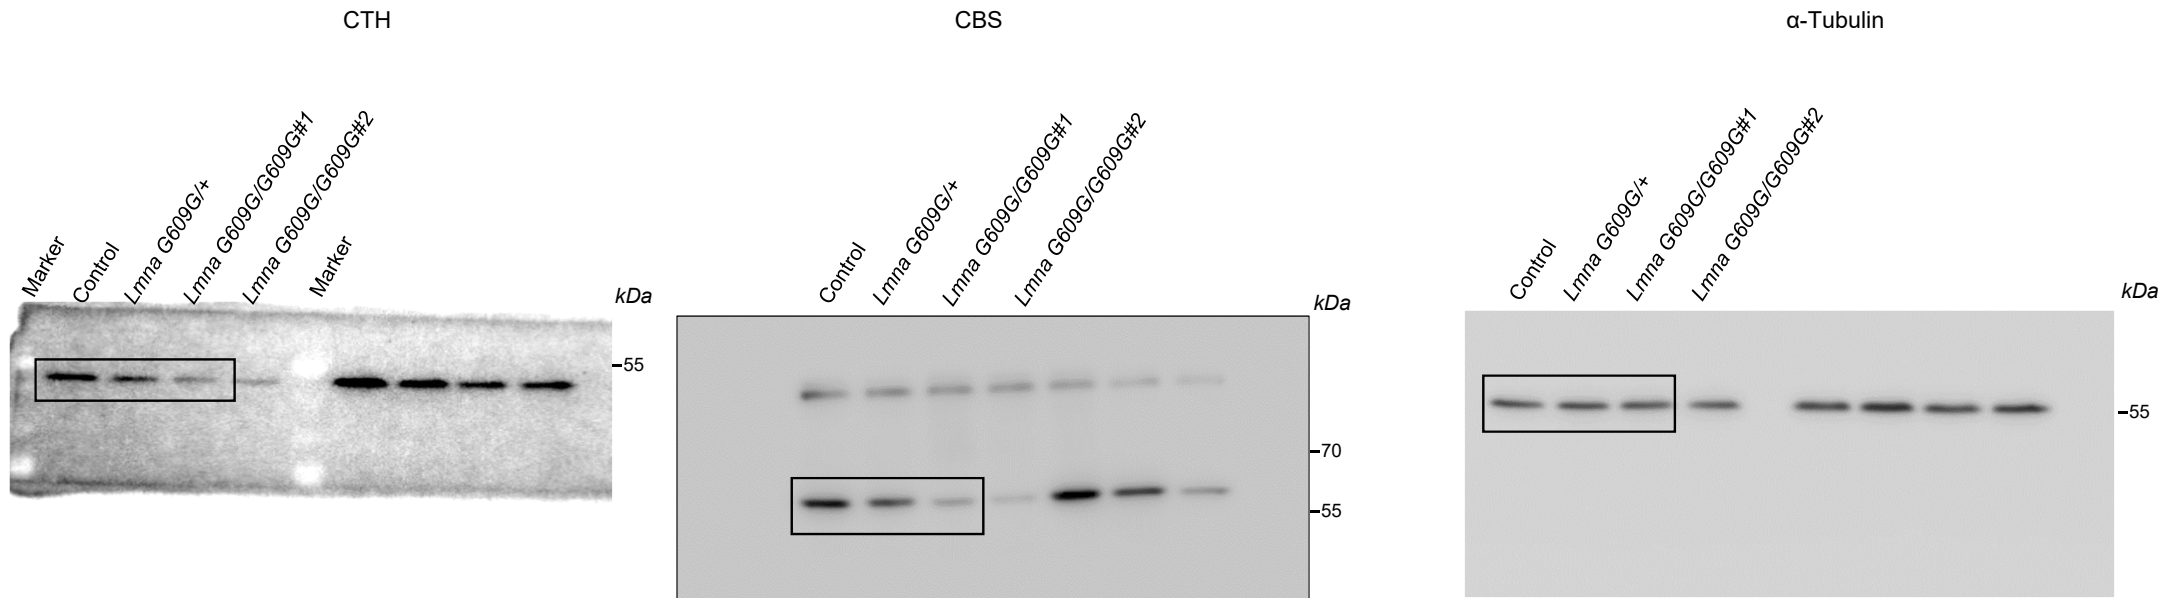

Supplement: MOESM10 [file 42255_2025_1443_MOESM10_ESM.pdf › 42255_2025_1443_MOESM10_ESM.pdf]

Full unedited blots for Fig. 5p

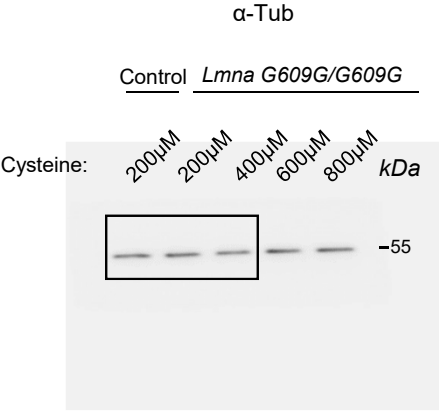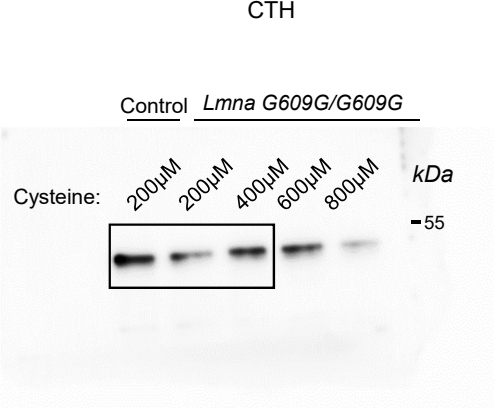

Supplement: MOESM16 [file 42255_2025_1443_MOESM16_ESM.pdf › 42255_2025_1443_MOESM16_ESM.pdf]

Full unedited blots for Fig. 8c

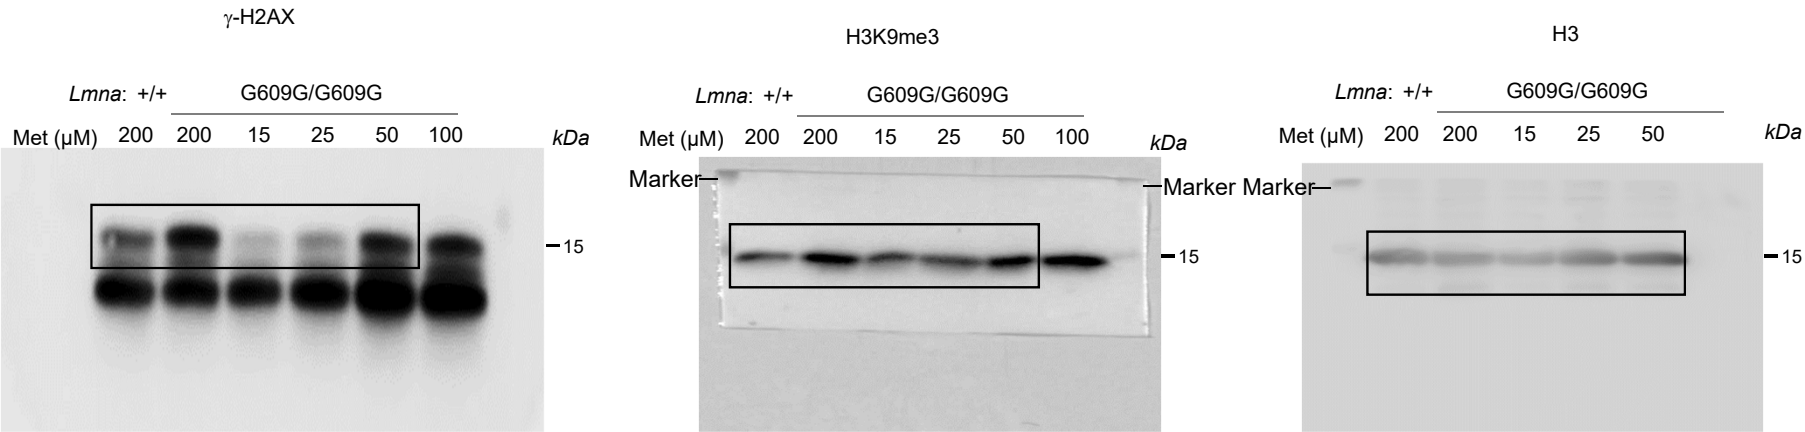

Supplement: MOESM21 [file 42255_2025_1443_MOESM21_ESM.pdf › 42255_2025_1443_MOESM21_ESM.pdf]

Full unedited blots for Extended Data Fig. 2f

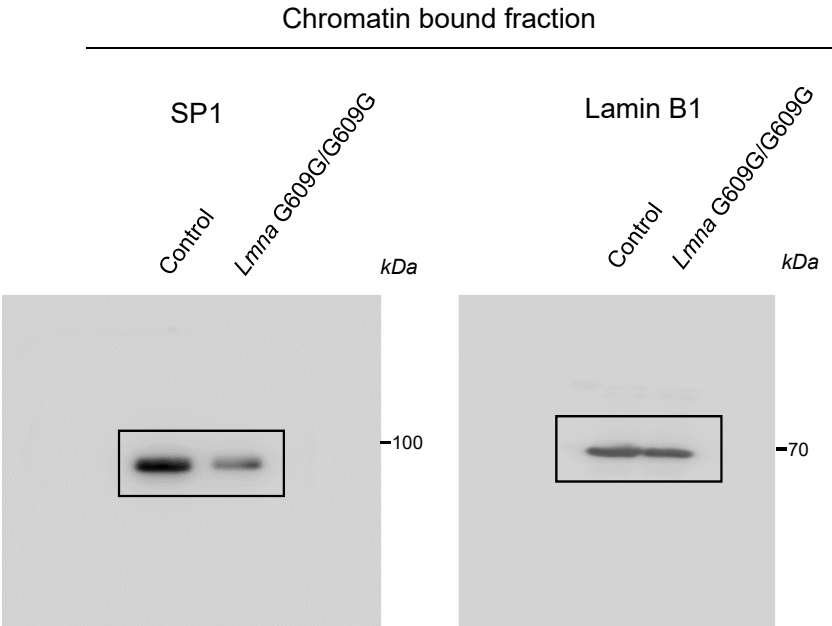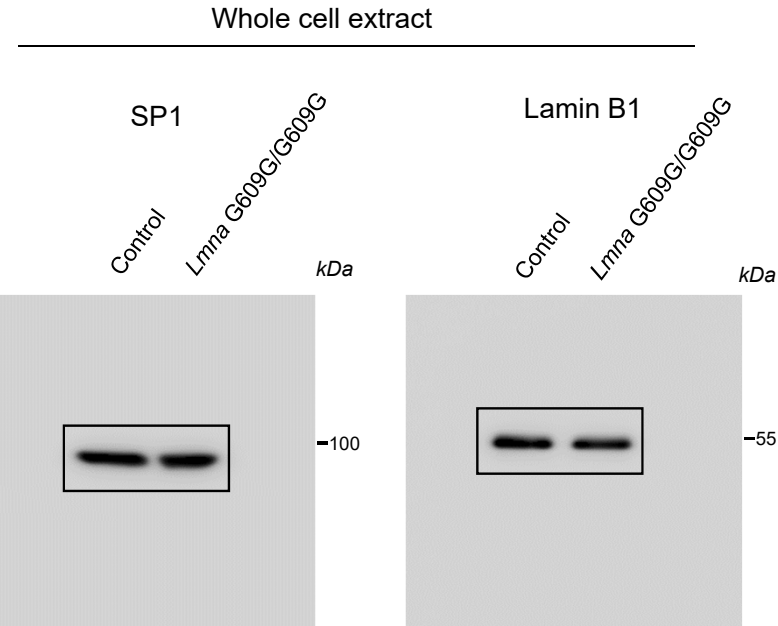

Supplement: MOESM25 [file 42255_2025_1443_MOESM25_ESM.pdf › 42255_2025_1443_MOESM25_ESM.pdf]

Full unedited blots for Extended Data Fig. 3c

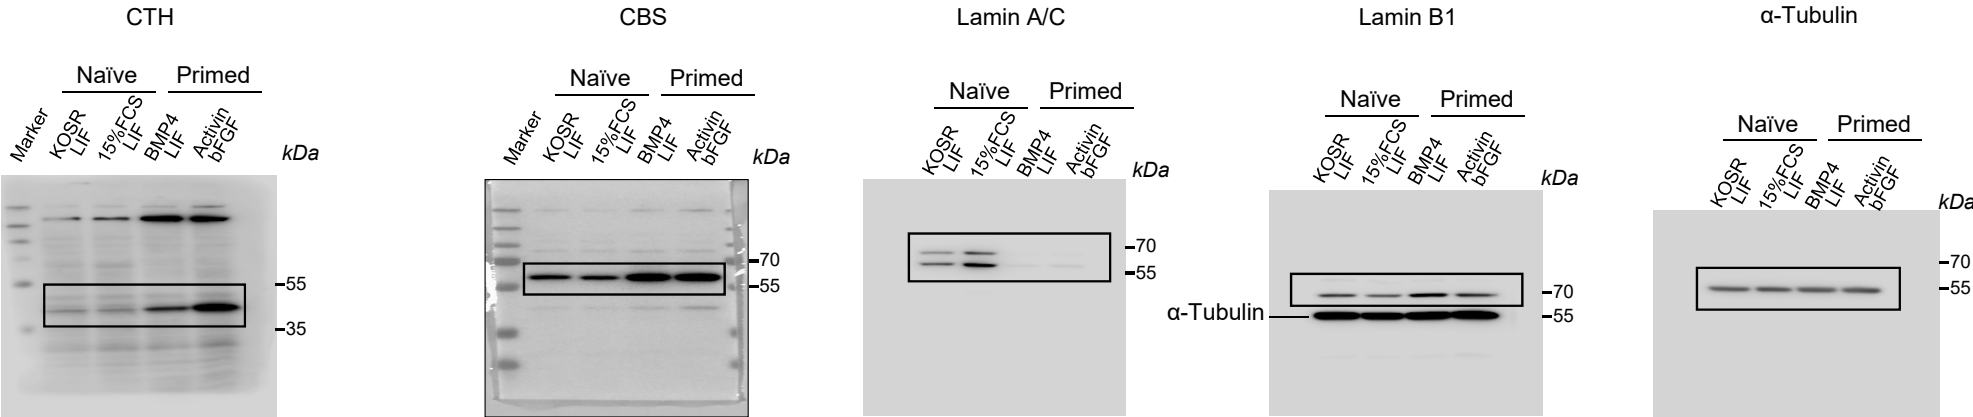

Supplement: MOESM27 [file 42255_2025_1443_MOESM27_ESM.pdf › 42255_2025_1443_MOESM27_ESM.pdf]
